# Supplementary material for: First-principles microkinetic analysis of Lewis acid sites in Zn-ZSM-5 for alkane dehydrogenation and its implication to methanol-to-aromatics conversion
Source: Royal Society of Chemistry journal article supplement (doi:10.1039/d0cy02318c), 2021-01-01
Supplement: d0cy02318c1.pdf [file d0cy02318c1.pdf]

# Supplementary Information

## **First-principles microkinetic analysis of Lewis acid sites in Zn-ZSM-5 for alkane dehydrogenation and its implication to methanol-to-aromatics conversion**

Yu-Jue Du, Wen-De Hu, Chuan-Ming Wang,\* Jian Zhou, Guang Yang, Yang-Dong  
Wang, Wei-Min Yang\*

State Key Laboratory of Green Chemical Engineering and Industrial Catalysis, Sinopec  
Shanghai Research Institute of Petrochemical Technology, Shanghai 201208, China

\*E-Mail: [wangcm.sshy@sinopec.com](mailto:wangcm.sshy@sinopec.com), [yangwm.sshy@sinopec.com](mailto:yangwm.sshy@sinopec.com)

## Supplemental Schemes, Figures and Tables

**Scheme S1** Schematic reaction mechanism of methanol to aromatics (MTA). HT: hydrogen transfer step; de-H<sub>2</sub>: dehydrogenation step.

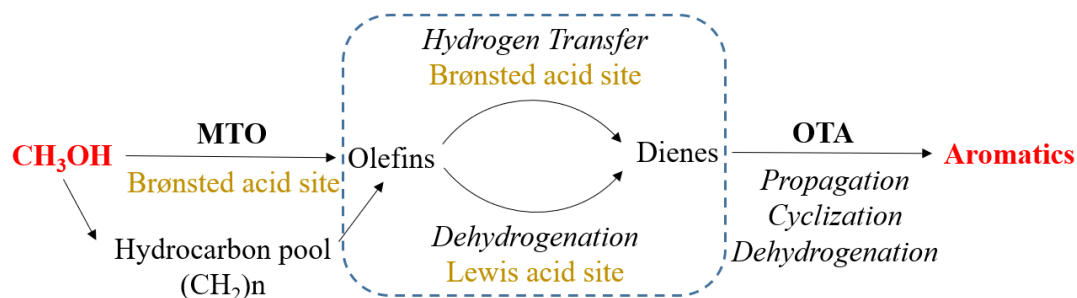

**Scheme S2** Reaction pathway of butane dehydrogenation on ZnOZn<sup>2+</sup> site for microkinetic modeling.

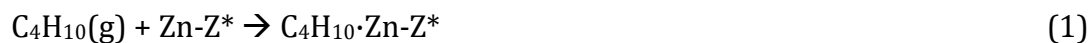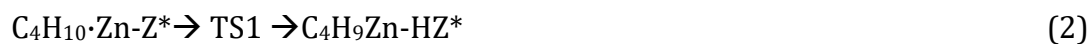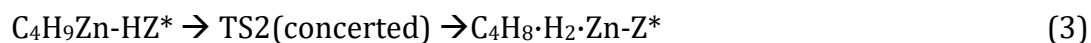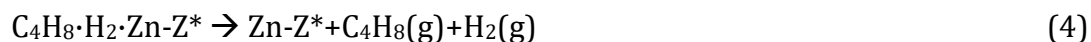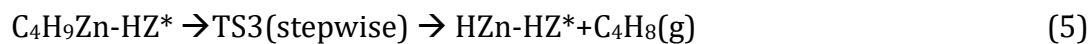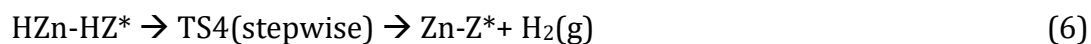

**Scheme S3** Reaction pathway of butane dehydrogenation on ZnOH<sup>+</sup> site for microkinetic modeling.

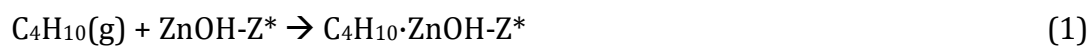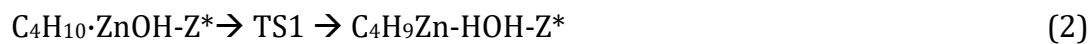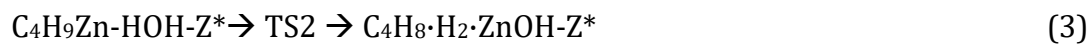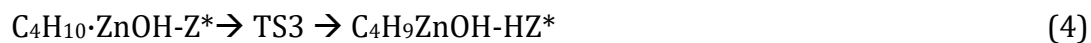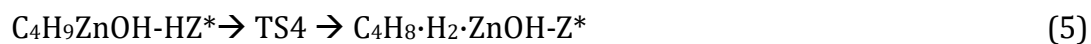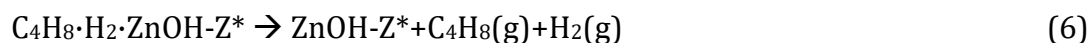

**Scheme S4** Reaction pathway of butane dehydrogenation on ZnH<sup>+</sup> site for microkinetic modeling.

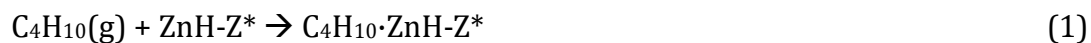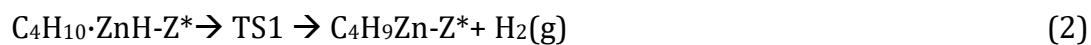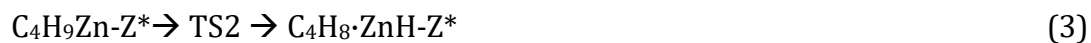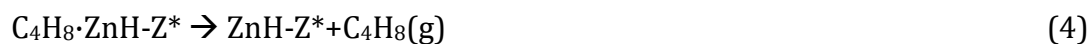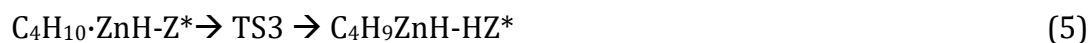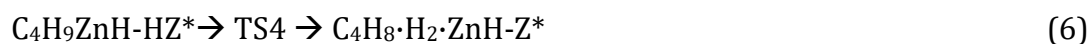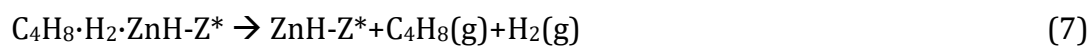

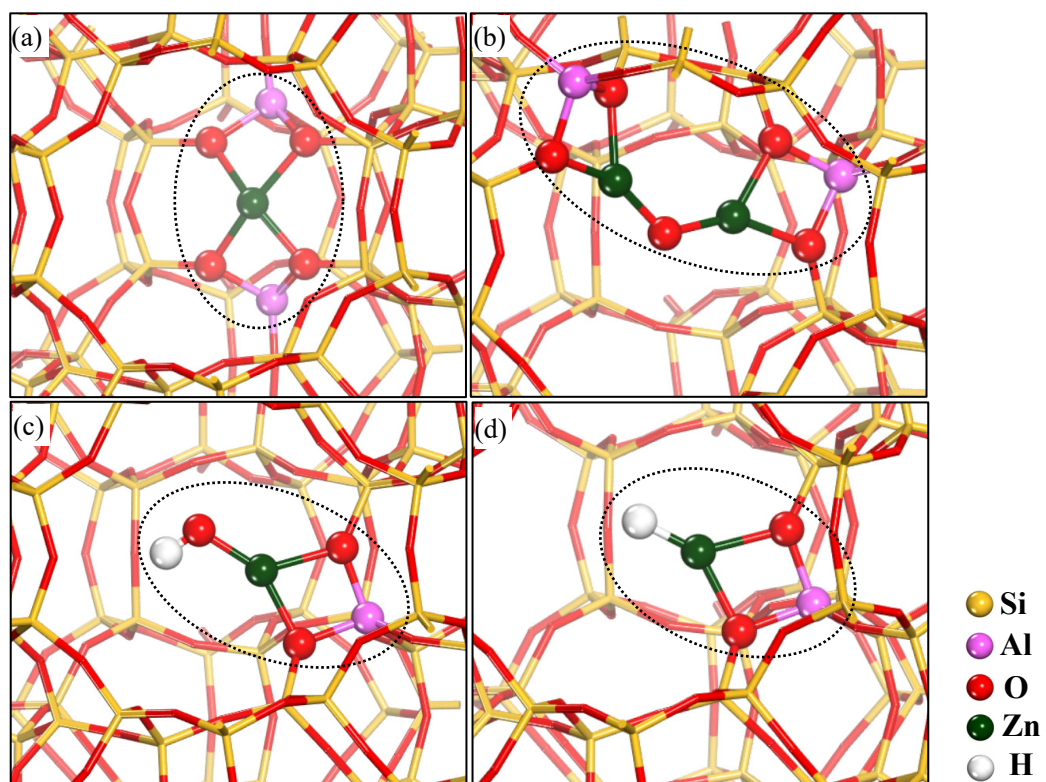

**Fig. S1** Investigated structures of four Zn sites. (a)  $\text{Zn}^{2+}$ , (b)  $\text{ZnOZn}^{2+}$ , (c)  $\text{ZnOH}^+$ , (d)  $\text{ZnH}^+$ .

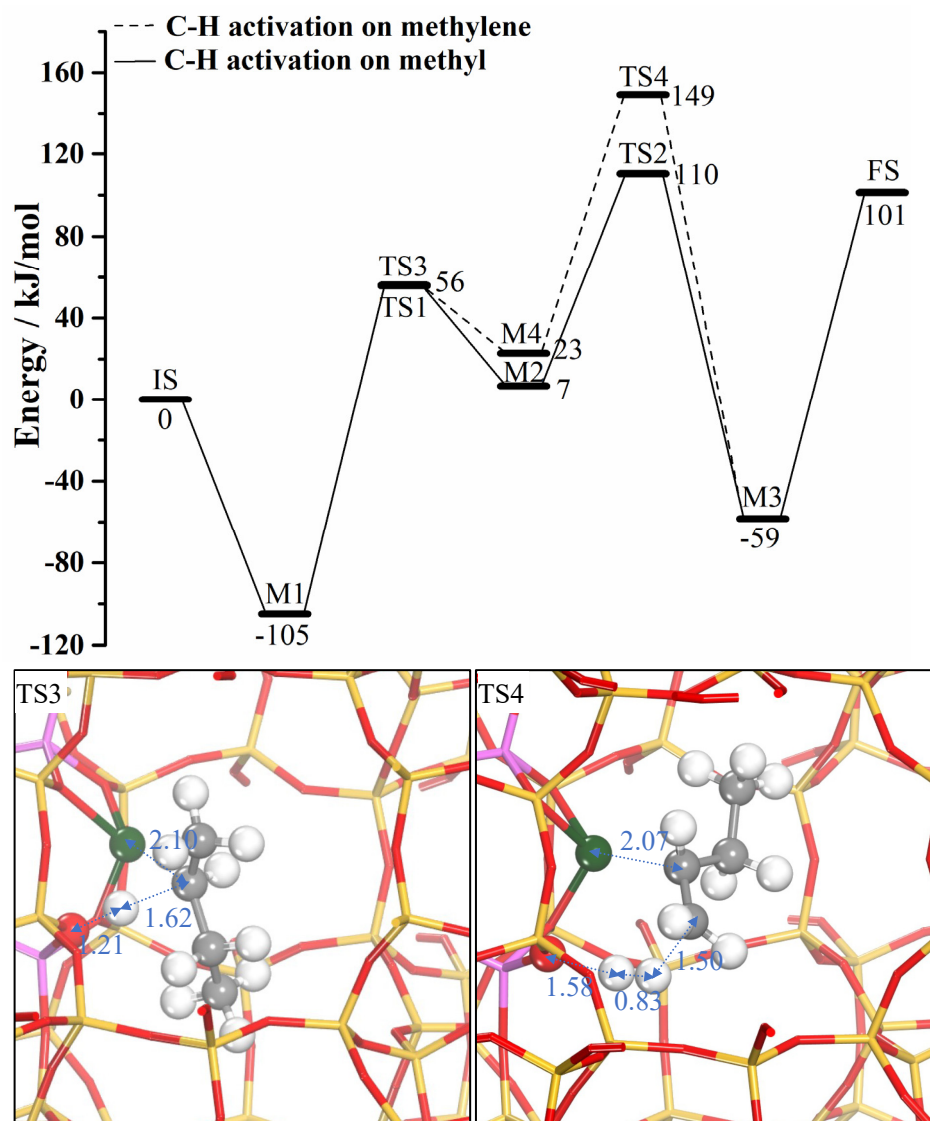

**Fig. S2** Energy profile of butane dehydrogenation on Zn<sup>2+</sup> site at 0 K. Solid line: first C-H activation on methyl group. Dash line: first C-H activation on methylene group.

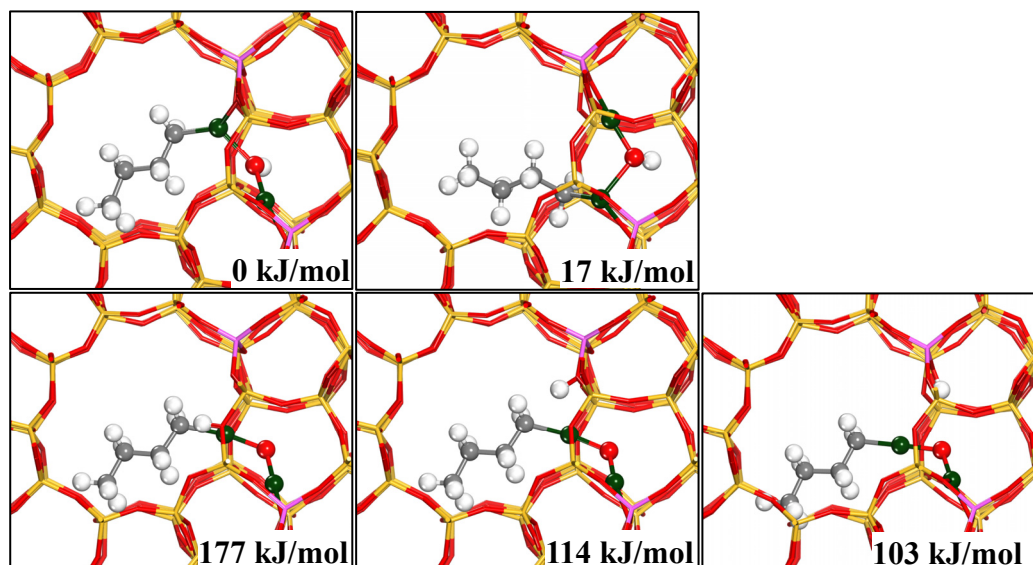

**Fig. S3** Investigated configurations for the intermediate state of a Zn-C<sub>4</sub>H<sub>9</sub> group and a bridging OH group (M2) in ZnO Zn<sup>2+</sup> catalyzed pathway. The most favorable structure is considered as energy reference, to which relative energies of other structures are listed.

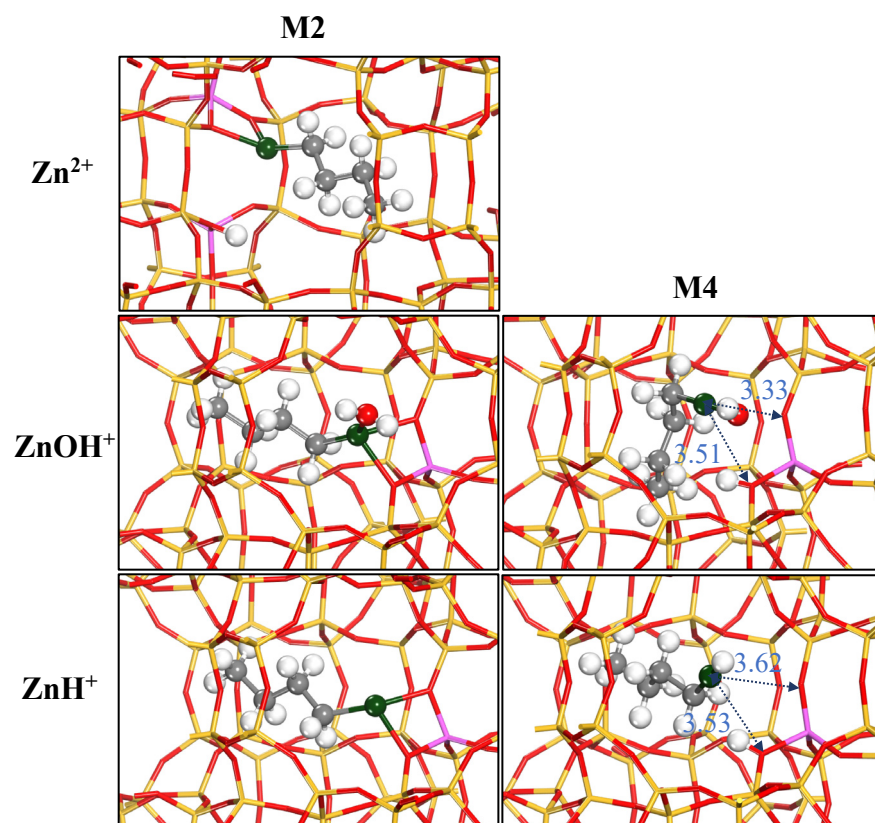

**Fig. S4** Optimized structures of intermediates M2 and M4 for butane dehydrogenation to 1-butene in Zn<sup>2+</sup>, ZnOH<sup>+</sup> and ZnH<sup>+</sup> catalyzed pathways.

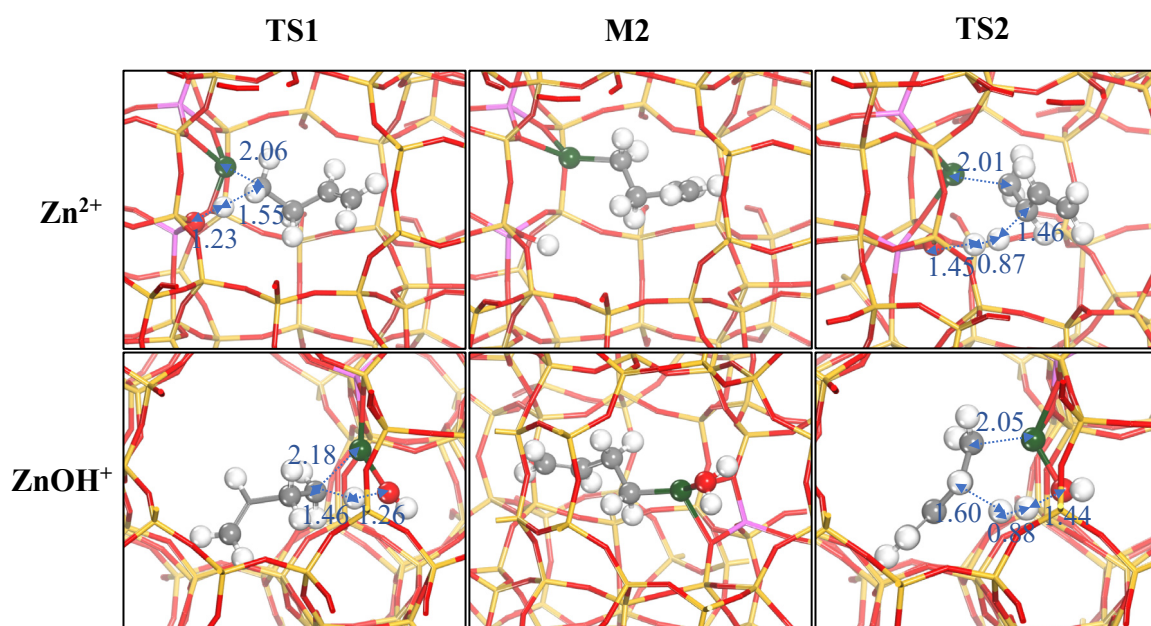

**Fig. S5** Optimized structures of key transition states (TS1 and TS2) and intermediate (M2) of 1-butene dehydrogenation to butadiene in Zn<sup>2+</sup> and ZnOH<sup>+</sup> catalyzed pathways.



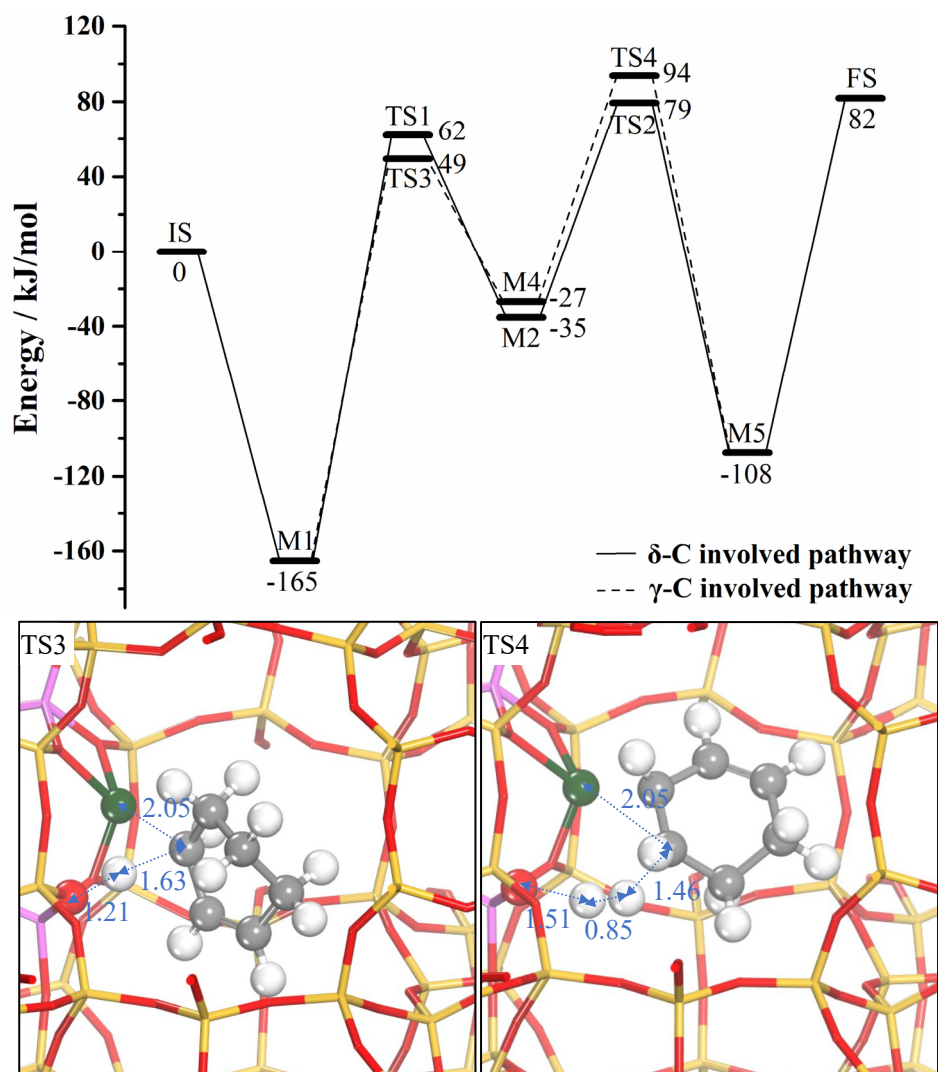

**Fig. S6** Energy profile of cyclohexene dehydrogenation to cyclohexadiene on Zn<sup>2+</sup> site at 0 K. Solid line: first C-H activation at the  $\delta$ -carbon atom of cyclohexene (next-nearest to double bond). Dash line: first C-H activation at the  $\gamma$ -carbon atom of cyclohexene (nearest to double bond).

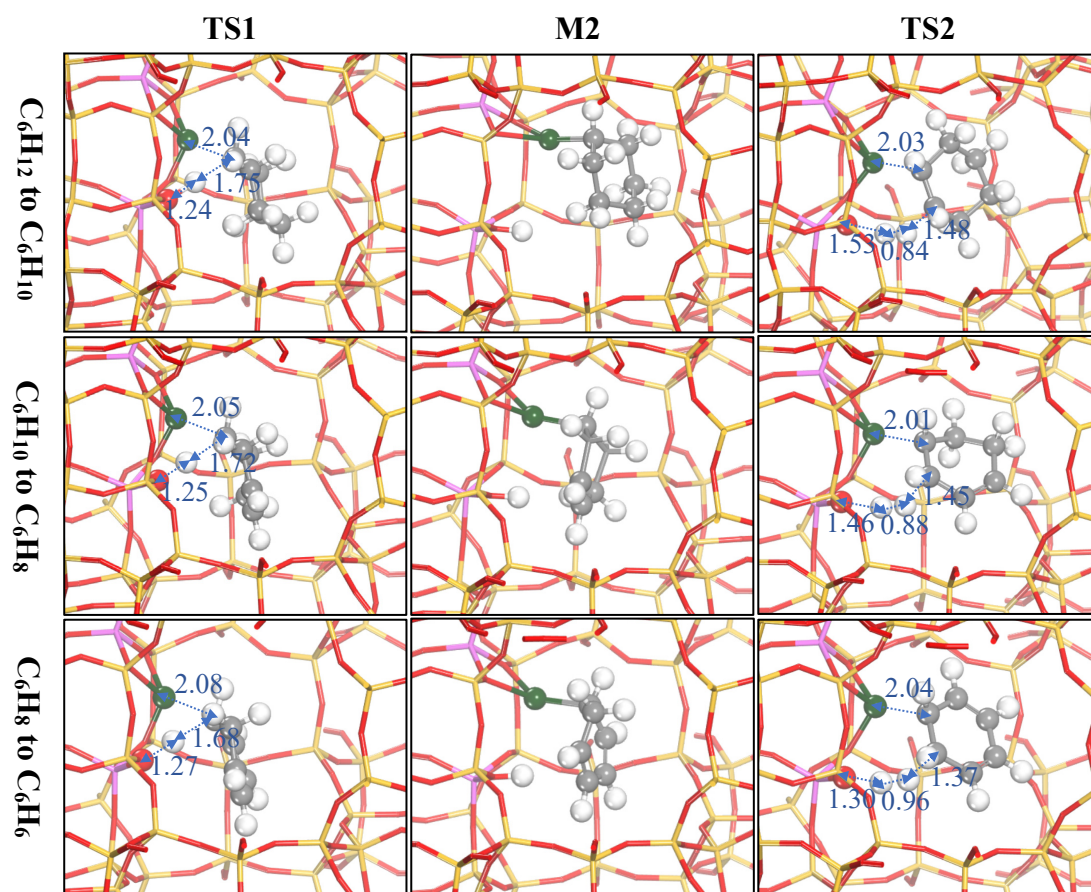

**Fig. S7** Optimized structures of key transition states (TS1 and TS2) and intermediate (M2) of three steps of cyclohexane dehydrogenation to benzene in  $Zn^{2+}$  catalyzed pathway.

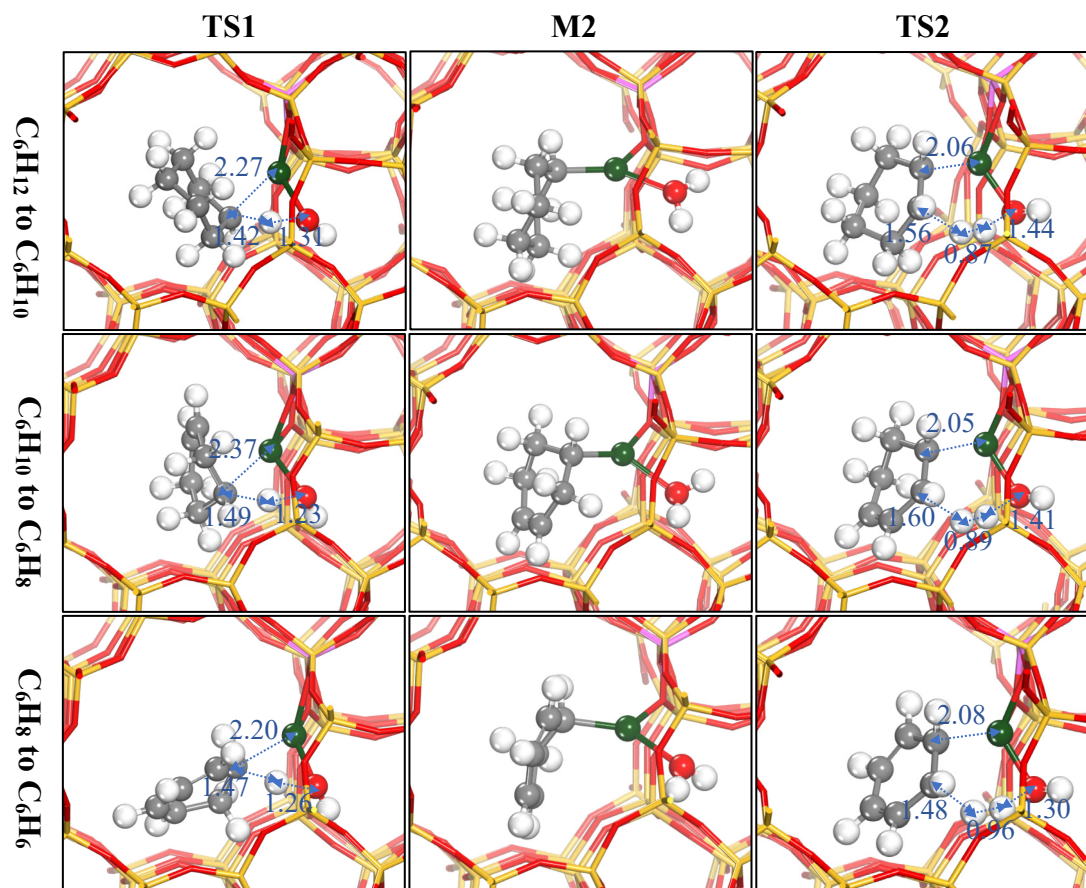

**Fig. S8** Optimized structures of key transition states (TS1 and TS2) and intermediate (M2) of three steps of cyclohexane dehydrogenation to benzene in  $ZnOH^+$  catalyzed pathway.

**Table S1** Calculated dehydrogenation activity (TOF, s<sup>-1</sup>) of butane/cyclohexane with sequence on ZnOH<sup>+</sup> and Zn<sup>2+</sup> sites at 1 bar and 673, 723 and 773 K, respectively.

| TOF   | Site              | C <sub>4</sub> H <sub>10</sub> | C <sub>4</sub> H <sub>8</sub> | C <sub>6</sub> H <sub>12</sub> | C <sub>6</sub> H <sub>10</sub> | C <sub>6</sub> H <sub>8</sub> |
|-------|-------------------|--------------------------------|-------------------------------|--------------------------------|--------------------------------|-------------------------------|
| 673 K | ZnOH <sup>+</sup> | 4.4×10 <sup>-7</sup>           | 2.5×10 <sup>-6</sup>          | 6.2×10 <sup>-7</sup>           | 1.4×10 <sup>-5</sup>           | 1.4×10 <sup>-3</sup>          |
|       | Zn <sup>2+</sup>  | 5.1×10 <sup>-7</sup>           | 1.4×10 <sup>-8</sup>          | 6.0×10 <sup>-7</sup>           | 2.0×10 <sup>-7</sup>           | 1.6×10 <sup>-8</sup>          |
| 723 K | ZnOH <sup>+</sup> | 2.3×10 <sup>-6</sup>           | 1.4×10 <sup>-5</sup>          | 5.2×10 <sup>-6</sup>           | 1.0×10 <sup>-4</sup>           | 3.9×10 <sup>-3</sup>          |
|       | Zn <sup>2+</sup>  | 6.5×10 <sup>-6</sup>           | 3.2×10 <sup>-7</sup>          | 1.1×10 <sup>-5</sup>           | 4.3×10 <sup>-6</sup>           | 3.6×10 <sup>-7</sup>          |
| 773 K | ZnOH <sup>+</sup> | 9.7×10 <sup>-6</sup>           | 5.6×10 <sup>-5</sup>          | 2.8×10 <sup>-5</sup>           | 4.1×10 <sup>-4</sup>           | 9.2×10 <sup>-3</sup>          |
|       | Zn <sup>2+</sup>  | 5.1×10 <sup>-5</sup>           | 5.1×10 <sup>-6</sup>          | 1.2×10 <sup>-4</sup>           | 6.0×10 <sup>-5</sup>           | 5.4×10 <sup>-6</sup>          |

## Supplemental structures in cif format

**C<sub>4</sub>H<sub>10</sub>-Phys.Ads-Zn<sup>2+</sup> (Fig. 3/M1)** Total energy = -1928.64575901 eV

```
data_
_audit_creation_method    'Materials Studio'
_cell_length_a            20.357621
_cell_length_b            20.050598
_cell_length_c            13.476578
_cell_angle_alpha         90.000000
_cell_angle_beta          90.000000
_cell_angle_gamma         90.000000
_symmetry_space_group_name_H-M  'P1'
loop_
_atom_site_type_symbol
_atom_site_label
_atom_site_fract_x
_atom_site_fract_y
_atom_site_fract_z
  H    H1            0.460181            0.600991            0.545149
  H    H2            0.539674            0.565965            0.549117
  H    H3            0.512246            0.606038            0.439831
  H    H4            0.590679            0.678787            0.536751
  H    H5            0.539130            0.673517            0.641400
  H    H6            0.450718            0.732366            0.553008
  H    H7            0.502735            0.737266            0.443321
  H    H8            0.531242            0.802910            0.645083
  H    H9            0.502861            0.845675            0.538617
  H    H10           0.581750            0.808223            0.538370
  C    C11           0.511066            0.608090            0.521077
  C    C12           0.539210            0.673870            0.559919
  C    C13           0.501887            0.736634            0.525979
  C    C14           0.531001            0.802366            0.563856
  O    O15           0.514573            0.031666            0.214308
  O    O16           0.013889            0.545822            0.711600
  O    O17           0.522067            0.442466            0.215734
  O    O18           0.010298            0.936511            0.698284
  O    O19           0.515829            0.935506            0.792539
  O    O20           0.015924            0.456193            0.290494
  O    O21           0.512144            0.552923            0.800150
  O    O22           0.020561            0.041376            0.287897
  O    O23           0.395661            0.063051            0.279577
```

|   |     |          |          |          |
|---|-----|----------|----------|----------|
| 0 | 024 | 0.131068 | 0.544844 | 0.788284 |
| 0 | 025 | 0.399112 | 0.423874 | 0.277359 |
| 0 | 026 | 0.128566 | 0.954813 | 0.772982 |
| 0 | 027 | 0.630870 | 0.943303 | 0.707952 |
| 0 | 028 | 0.898891 | 0.428655 | 0.214121 |
| 0 | 029 | 0.628392 | 0.532317 | 0.725187 |
| 0 | 030 | 0.894599 | 0.057063 | 0.241722 |
| 0 | 031 | 0.441214 | 0.116997 | 0.113553 |
| 0 | 032 | 0.106130 | 0.623298 | 0.633965 |
| 0 | 033 | 0.443690 | 0.364653 | 0.113997 |
| 0 | 034 | 0.109852 | 0.866739 | 0.628705 |
| 0 | 035 | 0.614947 | 0.862863 | 0.859910 |
| 0 | 036 | 0.937112 | 0.371420 | 0.381547 |
| 0 | 037 | 0.612398 | 0.622511 | 0.868164 |
| 0 | 038 | 0.946224 | 0.120815 | 0.395502 |
| 0 | 039 | 0.407844 | 0.989129 | 0.118176 |
| 0 | 040 | 0.113382 | 0.492502 | 0.610029 |
| 0 | 041 | 0.424620 | 0.495074 | 0.114100 |
| 0 | 042 | 0.100400 | 0.996180 | 0.589176 |
| 0 | 043 | 0.615680 | 0.994001 | 0.888609 |
| 0 | 044 | 0.905266 | 0.500631 | 0.375372 |
| 0 | 045 | 0.602720 | 0.493701 | 0.910826 |
| 0 | 046 | 0.930674 | 0.989420 | 0.404046 |
| 0 | 047 | 0.333103 | 0.062417 | 0.450501 |
| 0 | 048 | 0.201809 | 0.540583 | 0.947911 |
| 0 | 049 | 0.336371 | 0.426254 | 0.449810 |
| 0 | 050 | 0.198882 | 0.941798 | 0.935237 |
| 0 | 051 | 0.706820 | 0.922261 | 0.555368 |
| 0 | 052 | 0.834208 | 0.429741 | 0.046373 |
| 0 | 053 | 0.695447 | 0.549525 | 0.562722 |
| 0 | 054 | 0.831837 | 0.053669 | 0.070331 |
| 0 | 055 | 0.353110 | 0.948175 | 0.355366 |
| 0 | 056 | 0.208828 | 0.440005 | 0.817846 |
| 0 | 057 | 0.352189 | 0.538140 | 0.347119 |
| 0 | 058 | 0.216578 | 0.047895 | 0.818372 |
| 0 | 059 | 0.698281 | 0.043639 | 0.630769 |
| 0 | 060 | 0.855006 | 0.543704 | 0.141135 |
| 0 | 061 | 0.715995 | 0.440554 | 0.671889 |
| 0 | 062 | 0.853740 | 0.941800 | 0.169761 |
| 0 | 063 | 0.267248 | 0.037043 | 0.286461 |
| 0 | 064 | 0.260399 | 0.556128 | 0.773408 |
| 0 | 065 | 0.269652 | 0.444083 | 0.285626 |
| 0 | 066 | 0.256630 | 0.930892 | 0.758451 |
| 0 | 067 | 0.760970 | 0.950139 | 0.730093 |

|   |      |          |          |          |
|---|------|----------|----------|----------|
| 0 | 068  | 0.769859 | 0.457206 | 0.212688 |
| 0 | 069  | 0.755648 | 0.557594 | 0.738580 |
| 0 | 070  | 0.766535 | 0.029599 | 0.235190 |
| 0 | 071  | 0.300845 | 0.130679 | 0.609430 |
| 0 | 072  | 0.213809 | 0.622817 | 0.097829 |
| 0 | 073  | 0.300916 | 0.359633 | 0.608953 |
| 0 | 074  | 0.212622 | 0.865404 | 0.091738 |
| 0 | 075  | 0.718185 | 0.861355 | 0.385628 |
| 0 | 076  | 0.804282 | 0.357180 | 0.889729 |
| 0 | 077  | 0.716105 | 0.626679 | 0.408901 |
| 0 | 078  | 0.808126 | 0.118027 | 0.905794 |
| 0 | 079  | 0.217344 | 0.040957 | 0.536811 |
| 0 | 080  | 0.314257 | 0.545029 | 0.044194 |
| 0 | 081  | 0.213690 | 0.435744 | 0.516680 |
| 0 | 082  | 0.317059 | 0.926254 | 0.012060 |
| 0 | 083  | 0.812093 | 0.945936 | 0.444339 |
| 0 | 084  | 0.717836 | 0.444774 | 0.962621 |
| 0 | 085  | 0.814967 | 0.555830 | 0.490530 |
| 0 | 086  | 0.712365 | 0.049383 | 0.992141 |
| 0 | 087  | 0.326137 | 0.001603 | 0.625881 |
| 0 | 088  | 0.209069 | 0.491179 | 0.126899 |
| 0 | 089  | 0.310325 | 0.491555 | 0.616991 |
| 0 | 090  | 0.228488 | 0.997437 | 0.107343 |
| 0 | 091  | 0.696538 | 0.993057 | 0.389888 |
| 0 | 092  | 0.824830 | 0.485930 | 0.868415 |
| 0 | 093  | 0.721285 | 0.495762 | 0.387098 |
| 0 | 094  | 0.809800 | 0.985642 | 0.905301 |
| 0 | 095  | 0.126096 | 0.126440 | 0.597380 |
| 0 | 096  | 0.407116 | 0.625571 | 0.113057 |
| 0 | 097  | 0.123284 | 0.360374 | 0.603620 |
| 0 | 098  | 0.407592 | 0.857326 | 0.108892 |
| 0 | 099  | 0.905400 | 0.858917 | 0.400799 |
| 0 | 0100 | 0.626024 | 0.362653 | 0.897109 |
| 0 | 0101 | 0.909949 | 0.630307 | 0.416348 |
| 0 | 0102 | 0.622402 | 0.125710 | 0.904970 |
| 0 | 0103 | 0.112160 | 0.066098 | 0.424601 |
| 0 | 0104 | 0.424857 | 0.562661 | 0.944469 |
| 0 | 0105 | 0.093088 | 0.429106 | 0.442605 |
| 0 | 0106 | 0.440207 | 0.926516 | 0.950533 |
| 0 | 0107 | 0.910498 | 0.923592 | 0.571103 |
| 0 | 0108 | 0.610309 | 0.420221 | 0.071574 |
| 0 | 0109 | 0.937283 | 0.541836 | 0.555261 |
| 0 | 0110 | 0.591654 | 0.052145 | 0.061287 |
| 0 | 0111 | 0.142788 | 0.048499 | 0.233918 |

|   |      |          |          |          |
|---|------|----------|----------|----------|
| 0 | 0112 | 0.388527 | 0.535138 | 0.758459 |
| 0 | 0113 | 0.140998 | 0.424768 | 0.260203 |
| 0 | 0114 | 0.387101 | 0.939171 | 0.771353 |
| 0 | 0115 | 0.889718 | 0.949040 | 0.761373 |
| 0 | 0116 | 0.646175 | 0.431469 | 0.260012 |
| 0 | 0117 | 0.886046 | 0.560159 | 0.734695 |
| 0 | 0118 | 0.640078 | 0.063034 | 0.245415 |
| 0 | 0119 | 0.105395 | 0.946249 | 0.344941 |
| 0 | 0120 | 0.450448 | 0.444851 | 0.867478 |
| 0 | 0121 | 0.111259 | 0.541229 | 0.340139 |
| 0 | 0122 | 0.449609 | 0.040856 | 0.856923 |
| 0 | 0123 | 0.939339 | 0.042275 | 0.643717 |
| 0 | 0124 | 0.606473 | 0.537588 | 0.160169 |
| 0 | 0125 | 0.932995 | 0.442679 | 0.684039 |
| 0 | 0126 | 0.611364 | 0.945106 | 0.174644 |
| 0 | 0127 | 0.230344 | 0.125889 | 0.150921 |
| 0 | 0128 | 0.330929 | 0.620650 | 0.640905 |
| 0 | 0129 | 0.225317 | 0.359683 | 0.151633 |
| 0 | 0130 | 0.331891 | 0.869361 | 0.630563 |
| 0 | 0131 | 0.813779 | 0.860716 | 0.849873 |
| 0 | 0132 | 0.741289 | 0.367906 | 0.349853 |
| 0 | 0133 | 0.823086 | 0.618016 | 0.879676 |
| 0 | 0134 | 0.724313 | 0.122347 | 0.361621 |
| 0 | 0135 | 0.520587 | 0.854010 | 0.210552 |
| 0 | 0136 | 0.021432 | 0.349511 | 0.727632 |
| 0 | 0137 | 0.520308 | 0.629990 | 0.215751 |
| 0 | 0138 | 0.022411 | 0.132137 | 0.717954 |
| 0 | 0139 | 0.521408 | 0.139443 | 0.780134 |
| 0 | 0140 | 0.017981 | 0.630124 | 0.305390 |
| 0 | 0141 | 0.520209 | 0.347667 | 0.782740 |
| 0 | 0142 | 0.016962 | 0.855038 | 0.297897 |
| 0 | 0143 | 0.408862 | 0.818464 | 0.296392 |
| 0 | 0144 | 0.140856 | 0.328386 | 0.793825 |
| 0 | 0145 | 0.407819 | 0.667610 | 0.298713 |
| 0 | 0146 | 0.140026 | 0.153359 | 0.790552 |
| 0 | 0147 | 0.642031 | 0.149708 | 0.712948 |
| 0 | 0148 | 0.903744 | 0.653882 | 0.222970 |
| 0 | 0149 | 0.637398 | 0.336516 | 0.703690 |
| 0 | 0150 | 0.904180 | 0.824192 | 0.210244 |
| 0 | 0151 | 0.462037 | 0.741606 | 0.157196 |
| 0 | 0152 | 0.087788 | 0.242196 | 0.667675 |
| 0 | 0153 | 0.595627 | 0.243896 | 0.831011 |
| 0 | 0154 | 0.954970 | 0.743412 | 0.345864 |
| 0 | 0155 | 0.336984 | 0.817140 | 0.451016 |



|   |      |          |          |          |
|---|------|----------|----------|----------|
| 0 | 0156 | 0.206120 | 0.347061 | 0.959765 |
| 0 | 0157 | 0.336524 | 0.666439 | 0.456163 |
| 0 | 0158 | 0.204796 | 0.141002 | 0.958646 |
| 0 | 0159 | 0.710686 | 0.161738 | 0.549672 |
| 0 | 0160 | 0.831777 | 0.662776 | 0.064983 |
| 0 | 0161 | 0.705652 | 0.343293 | 0.537190 |
| 0 | 0162 | 0.839821 | 0.840893 | 0.041550 |
| 0 | 0163 | 0.269786 | 0.847070 | 0.267200 |
| 0 | 0164 | 0.271830 | 0.326135 | 0.794697 |
| 0 | 0165 | 0.267812 | 0.644845 | 0.274468 |
| 0 | 0166 | 0.270713 | 0.165859 | 0.794170 |
| 0 | 0167 | 0.772318 | 0.134297 | 0.718052 |
| 0 | 0168 | 0.775623 | 0.626757 | 0.235135 |
| 0 | 0169 | 0.767736 | 0.322849 | 0.706400 |
| 0 | 0170 | 0.773833 | 0.841759 | 0.209480 |
| 0 | 0171 | 0.297598 | 0.744286 | 0.602492 |
| 0 | 0172 | 0.244610 | 0.243085 | 0.068814 |
| 0 | 0173 | 0.747920 | 0.246783 | 0.413707 |
| 0 | 0174 | 0.797292 | 0.742931 | 0.921164 |
| 0 | 0175 | 0.220526 | 0.842255 | 0.531572 |
| 0 | 0176 | 0.327373 | 0.342504 | 0.031379 |
| 0 | 0177 | 0.219968 | 0.643829 | 0.541187 |
| 0 | 0178 | 0.327456 | 0.143953 | 0.023168 |
| 0 | 0179 | 0.829302 | 0.149634 | 0.469676 |
| 0 | 0180 | 0.715467 | 0.647368 | 0.982937 |
| 0 | 0181 | 0.830305 | 0.338980 | 0.486195 |
| 0 | 0182 | 0.716532 | 0.839431 | 0.980118 |
| 0 | 0183 | 0.137673 | 0.744158 | 0.577520 |
| 0 | 0184 | 0.408614 | 0.241618 | 0.076560 |
| 0 | 0185 | 0.916539 | 0.246557 | 0.430334 |
| 0 | 0186 | 0.631197 | 0.743614 | 0.931690 |
| 0 | 0187 | 0.105692 | 0.831097 | 0.438063 |
| 0 | 0188 | 0.435407 | 0.321425 | 0.926826 |
| 0 | 0189 | 0.107773 | 0.653651 | 0.442148 |
| 0 | 0190 | 0.439446 | 0.162177 | 0.927947 |
| 0 | 0191 | 0.934855 | 0.166231 | 0.581391 |
| 0 | 0192 | 0.596728 | 0.650656 | 0.061029 |
| 0 | 0193 | 0.946781 | 0.335496 | 0.570123 |
| 0 | 0194 | 0.595661 | 0.842644 | 0.051832 |
| 0 | 0195 | 0.140145 | 0.835506 | 0.247868 |
| 0 | 0196 | 0.394025 | 0.358518 | 0.745946 |
| 0 | 0197 | 0.138907 | 0.656700 | 0.250668 |
| 0 | 0198 | 0.393863 | 0.133168 | 0.746426 |
| 0 | 0199 | 0.897766 | 0.137685 | 0.766375 |

|    |       |          |          |          |
|----|-------|----------|----------|----------|
| O  | O200  | 0.647031 | 0.649892 | 0.244366 |
| O  | O201  | 0.894723 | 0.326613 | 0.752120 |
| O  | O202  | 0.645954 | 0.823262 | 0.231586 |
| O  | O203  | 0.217797 | 0.744873 | 0.166838 |
| O  | O204  | 0.342004 | 0.245494 | 0.681566 |
| O  | O205  | 0.818098 | 0.234733 | 0.828189 |
| O  | O206  | 0.729900 | 0.739866 | 0.314244 |
| Al | Al207 | 0.337521 | 0.865352 | 0.337516 |
| Al | Al208 | 0.335908 | 0.621391 | 0.340266 |
| Si | Si209 | 0.717148 | 0.660846 | 0.299463 |
| Si | Si210 | 0.439820 | 0.050227 | 0.181519 |
| Si | Si211 | 0.091206 | 0.551578 | 0.684935 |
| Si | Si212 | 0.446367 | 0.431581 | 0.181324 |
| Si | Si213 | 0.087920 | 0.938731 | 0.672157 |
| Si | Si214 | 0.594219 | 0.934454 | 0.813618 |
| Si | Si215 | 0.940067 | 0.439081 | 0.316265 |
| Si | Si216 | 0.589650 | 0.550187 | 0.826760 |
| Si | Si217 | 0.947346 | 0.052121 | 0.331901 |
| Si | Si218 | 0.337483 | 0.026058 | 0.342576 |
| Si | Si219 | 0.200692 | 0.520018 | 0.832858 |
| Si | Si220 | 0.339561 | 0.459481 | 0.339347 |
| Si | Si221 | 0.199960 | 0.968694 | 0.822334 |
| Si | Si222 | 0.699645 | 0.964859 | 0.656907 |
| Si | Si223 | 0.839354 | 0.464711 | 0.154434 |
| Si | Si224 | 0.699436 | 0.519759 | 0.674347 |
| Si | Si225 | 0.836567 | 0.020549 | 0.179708 |
| Si | Si226 | 0.294403 | 0.058825 | 0.554964 |
| Si | Si227 | 0.234910 | 0.550601 | 0.055694 |
| Si | Si228 | 0.290611 | 0.428386 | 0.547872 |
| Si | Si229 | 0.238974 | 0.932240 | 0.038341 |
| Si | Si230 | 0.733722 | 0.930640 | 0.442907 |
| Si | Si231 | 0.795096 | 0.429309 | 0.941760 |
| Si | Si232 | 0.737502 | 0.556919 | 0.461253 |
| Si | Si233 | 0.790537 | 0.051748 | 0.967819 |
| Si | Si234 | 0.139324 | 0.057670 | 0.536977 |
| Si | Si235 | 0.392298 | 0.556450 | 0.053945 |
| Si | Si236 | 0.136278 | 0.429208 | 0.543724 |
| Si | Si237 | 0.392915 | 0.925568 | 0.047538 |
| Si | Si238 | 0.889808 | 0.929348 | 0.455199 |
| Si | Si239 | 0.639425 | 0.429932 | 0.960511 |
| Si | Si240 | 0.891954 | 0.557038 | 0.459459 |
| Si | Si241 | 0.635665 | 0.055433 | 0.961185 |
| Si | Si242 | 0.095175 | 0.025252 | 0.323161 |
| Si | Si243 | 0.443358 | 0.523746 | 0.842606 |

|    |       |          |          |          |
|----|-------|----------|----------|----------|
| Si | Si244 | 0.090320 | 0.463058 | 0.332903 |
| Si | Si245 | 0.447454 | 0.960788 | 0.841678 |
| Si | Si246 | 0.937819 | 0.962902 | 0.668306 |
| Si | Si247 | 0.595600 | 0.457896 | 0.176396 |
| Si | Si248 | 0.942615 | 0.522406 | 0.671978 |
| Si | Si249 | 0.589158 | 0.023287 | 0.174143 |
| Si | Si250 | 0.217923 | 0.051599 | 0.195055 |
| Si | Si251 | 0.321990 | 0.549761 | 0.697776 |
| Si | Si252 | 0.211966 | 0.430445 | 0.206181 |
| Si | Si253 | 0.325027 | 0.936548 | 0.697007 |
| Si | Si254 | 0.818529 | 0.936874 | 0.810540 |
| Si | Si255 | 0.720124 | 0.438560 | 0.302321 |
| Si | Si256 | 0.822149 | 0.554830 | 0.805452 |
| Si | Si257 | 0.707322 | 0.052162 | 0.308240 |
| Si | Si258 | 0.450171 | 0.818246 | 0.191874 |
| Si | Si259 | 0.093323 | 0.320122 | 0.697958 |
| Si | Si260 | 0.449927 | 0.665646 | 0.194722 |
| Si | Si261 | 0.094182 | 0.163591 | 0.693218 |
| Si | Si262 | 0.595128 | 0.164794 | 0.807373 |
| Si | Si263 | 0.947175 | 0.664746 | 0.322408 |
| Si | Si264 | 0.594711 | 0.322459 | 0.803591 |
| Si | Si265 | 0.945840 | 0.820554 | 0.313382 |
| Si | Si266 | 0.206632 | 0.360675 | 0.841433 |
| Si | Si267 | 0.207609 | 0.126943 | 0.840288 |
| Si | Si268 | 0.705795 | 0.122468 | 0.654210 |
| Si | Si269 | 0.841454 | 0.621426 | 0.166903 |
| Si | Si270 | 0.706197 | 0.360877 | 0.654939 |
| Si | Si271 | 0.842958 | 0.862151 | 0.157681 |
| Si | Si272 | 0.295444 | 0.818980 | 0.555397 |
| Si | Si273 | 0.250889 | 0.322586 | 0.052772 |
| Si | Si274 | 0.295153 | 0.668141 | 0.560580 |
| Si | Si275 | 0.251755 | 0.163891 | 0.050283 |
| Si | Si276 | 0.753054 | 0.169656 | 0.448360 |
| Si | Si277 | 0.791902 | 0.667280 | 0.961453 |
| Si | Si278 | 0.755860 | 0.323890 | 0.447504 |
| Si | Si279 | 0.792208 | 0.821165 | 0.949319 |
| Si | Si280 | 0.142928 | 0.821419 | 0.543139 |
| Si | Si281 | 0.403613 | 0.317963 | 0.037482 |
| Si | Si282 | 0.142516 | 0.665938 | 0.548224 |
| Si | Si283 | 0.404148 | 0.165603 | 0.035885 |
| Si | Si284 | 0.906717 | 0.170449 | 0.468732 |
| Si | Si285 | 0.638920 | 0.665851 | 0.961209 |
| Si | Si286 | 0.907882 | 0.323270 | 0.466808 |
| Si | Si287 | 0.639854 | 0.822103 | 0.956306 |

|    |       |          |          |          |
|----|-------|----------|----------|----------|
| Si | Si288 | 0.092718 | 0.866889 | 0.331325 |
| Si | Si289 | 0.449769 | 0.367768 | 0.830515 |
| Si | Si290 | 0.094731 | 0.620476 | 0.333952 |
| Si | Si291 | 0.450746 | 0.119183 | 0.827444 |
| Si | Si292 | 0.948445 | 0.119449 | 0.677661 |
| Si | Si293 | 0.593328 | 0.616758 | 0.170498 |
| Si | Si294 | 0.948671 | 0.363570 | 0.683186 |
| Si | Si295 | 0.593924 | 0.866460 | 0.167013 |
| Si | Si296 | 0.211507 | 0.823269 | 0.195509 |
| Si | Si297 | 0.327112 | 0.322677 | 0.707847 |
| Si | Si298 | 0.210948 | 0.667272 | 0.199365 |
| Si | Si299 | 0.326789 | 0.168417 | 0.708151 |
| Si | Si300 | 0.824239 | 0.156333 | 0.803455 |
| Si | Si301 | 0.821587 | 0.311654 | 0.793882 |
| Si | Si302 | 0.717239 | 0.817126 | 0.285104 |
| Zn | Zn303 | 0.396173 | 0.742538 | 0.399438 |

**TS-C<sub>4</sub>H<sub>10</sub>-dehydro-Zn<sup>2+</sup> (Fig. 3/TS1)** Total energy = -1926.86064953 eV

data\_

\_audit\_creation\_method 'Materials Studio'

\_cell\_length\_a 20.357621

\_cell\_length\_b 20.050598

\_cell\_length\_c 13.476578

\_cell\_angle\_alpha 90.000000

\_cell\_angle\_beta 90.000000

\_cell\_angle\_gamma 90.000000

\_symmetry\_space\_group\_name\_H-M 'P1'

loop\_

\_atom\_site\_type\_symbol

\_atom\_site\_label

\_atom\_site\_fract\_x

\_atom\_site\_fract\_y

\_atom\_site\_fract\_z

|   |     |          |          |          |
|---|-----|----------|----------|----------|
| H | H1  | 0.419119 | 0.735686 | 0.587073 |
| H | H2  | 0.391263 | 0.687074 | 0.484136 |
| H | H3  | 0.465043 | 0.785025 | 0.513989 |
| H | H4  | 0.523883 | 0.658459 | 0.474757 |
| H | H5  | 0.500880 | 0.654999 | 0.599960 |
| H | H6  | 0.554408 | 0.776032 | 0.610989 |
| H | H7  | 0.591815 | 0.754695 | 0.497760 |
| H | H8  | 0.606520 | 0.683090 | 0.697887 |
| H | H9  | 0.668383 | 0.727076 | 0.632697 |
| H | H10 | 0.638576 | 0.650392 | 0.585923 |

|   |     |          |          |          |
|---|-----|----------|----------|----------|
| C | C11 | 0.449444 | 0.732053 | 0.520031 |
| C | C12 | 0.511451 | 0.689683 | 0.538967 |
| C | C13 | 0.571120 | 0.733487 | 0.566264 |
| C | C14 | 0.624347 | 0.696241 | 0.623777 |
| O | O15 | 0.511155 | 0.023786 | 0.207137 |
| O | O16 | 0.027553 | 0.532073 | 0.718197 |
| O | O17 | 0.526333 | 0.438036 | 0.211436 |
| O | O18 | 0.012614 | 0.939167 | 0.697945 |
| O | O19 | 0.519778 | 0.947808 | 0.786760 |
| O | O20 | 0.018406 | 0.452531 | 0.293151 |
| O | O21 | 0.518667 | 0.540124 | 0.798048 |
| O | O22 | 0.020105 | 0.039661 | 0.284990 |
| O | O23 | 0.392812 | 0.060955 | 0.269286 |
| O | O24 | 0.147082 | 0.561707 | 0.779339 |
| O | O25 | 0.403258 | 0.436615 | 0.270242 |
| O | O26 | 0.135180 | 0.951424 | 0.753499 |
| O | O27 | 0.636950 | 0.927147 | 0.712751 |
| O | O28 | 0.899521 | 0.429236 | 0.224964 |
| O | O29 | 0.642786 | 0.537080 | 0.748191 |
| O | O30 | 0.894512 | 0.045077 | 0.237551 |
| O | O31 | 0.442306 | 0.110255 | 0.101748 |
| O | O32 | 0.101074 | 0.618021 | 0.615974 |
| O | O33 | 0.441842 | 0.357484 | 0.125079 |
| O | O34 | 0.101518 | 0.863289 | 0.613838 |
| O | O35 | 0.600252 | 0.860137 | 0.870852 |
| O | O36 | 0.940338 | 0.369881 | 0.389233 |
| O | O37 | 0.601184 | 0.614229 | 0.897669 |
| O | O38 | 0.942160 | 0.119553 | 0.385210 |
| O | O39 | 0.402719 | 0.984151 | 0.111605 |
| O | O40 | 0.132058 | 0.489318 | 0.617878 |
| O | O41 | 0.435988 | 0.488258 | 0.093168 |
| O | O42 | 0.098655 | 0.993033 | 0.574263 |
| O | O43 | 0.626439 | 0.990010 | 0.884434 |
| O | O44 | 0.912494 | 0.499873 | 0.387916 |
| O | O45 | 0.603304 | 0.482616 | 0.919198 |
| O | O46 | 0.932867 | 0.988008 | 0.407087 |
| O | O47 | 0.331432 | 0.062318 | 0.440945 |
| O | O48 | 0.203275 | 0.549100 | 0.953490 |
| O | O49 | 0.342808 | 0.442932 | 0.440912 |
| O | O50 | 0.199481 | 0.944271 | 0.920412 |
| O | O51 | 0.701386 | 0.924542 | 0.546680 |
| O | O52 | 0.835857 | 0.423705 | 0.056959 |
| O | O53 | 0.705237 | 0.539697 | 0.577450 |
| O | O54 | 0.833951 | 0.033361 | 0.064994 |

|   |     |          |          |          |
|---|-----|----------|----------|----------|
| 0 | 055 | 0.349601 | 0.946633 | 0.347578 |
| 0 | 056 | 0.190452 | 0.442931 | 0.833634 |
| 0 | 057 | 0.336072 | 0.545240 | 0.317009 |
| 0 | 058 | 0.219797 | 0.047485 | 0.801704 |
| 0 | 059 | 0.695235 | 0.037650 | 0.650845 |
| 0 | 060 | 0.847723 | 0.540276 | 0.149072 |
| 0 | 061 | 0.719865 | 0.435738 | 0.696690 |
| 0 | 062 | 0.829867 | 0.933807 | 0.193896 |
| 0 | 063 | 0.264145 | 0.035315 | 0.278523 |
| 0 | 064 | 0.275757 | 0.538142 | 0.792517 |
| 0 | 065 | 0.272968 | 0.432408 | 0.277203 |
| 0 | 066 | 0.263570 | 0.929539 | 0.749161 |
| 0 | 067 | 0.768118 | 0.936372 | 0.712501 |
| 0 | 068 | 0.769479 | 0.447117 | 0.221370 |
| 0 | 069 | 0.771609 | 0.552425 | 0.745437 |
| 0 | 070 | 0.764466 | 0.045886 | 0.228659 |
| 0 | 071 | 0.299335 | 0.129916 | 0.601211 |
| 0 | 072 | 0.232920 | 0.620320 | 0.112301 |
| 0 | 073 | 0.327628 | 0.375059 | 0.602614 |
| 0 | 074 | 0.203165 | 0.864902 | 0.071959 |
| 0 | 075 | 0.726882 | 0.858793 | 0.383532 |
| 0 | 076 | 0.810532 | 0.354247 | 0.895627 |
| 0 | 077 | 0.720412 | 0.618468 | 0.424370 |
| 0 | 078 | 0.821134 | 0.111953 | 0.912341 |
| 0 | 079 | 0.218832 | 0.035378 | 0.533496 |
| 0 | 080 | 0.318526 | 0.532375 | 0.041396 |
| 0 | 081 | 0.222502 | 0.427601 | 0.512182 |
| 0 | 082 | 0.314890 | 0.919471 | 0.000475 |
| 0 | 083 | 0.813457 | 0.947253 | 0.450440 |
| 0 | 084 | 0.723965 | 0.443727 | 0.959748 |
| 0 | 085 | 0.824599 | 0.557603 | 0.505378 |
| 0 | 086 | 0.714731 | 0.055076 | 0.991808 |
| 0 | 087 | 0.331438 | 0.002806 | 0.617989 |
| 0 | 088 | 0.209654 | 0.489492 | 0.126350 |
| 0 | 089 | 0.306873 | 0.505298 | 0.605940 |
| 0 | 090 | 0.230696 | 0.994473 | 0.096553 |
| 0 | 091 | 0.700352 | 0.989396 | 0.377650 |
| 0 | 092 | 0.836744 | 0.483588 | 0.882448 |
| 0 | 093 | 0.738213 | 0.488317 | 0.402779 |
| 0 | 094 | 0.798800 | 0.982488 | 0.890881 |
| 0 | 095 | 0.127768 | 0.122524 | 0.586836 |
| 0 | 096 | 0.407844 | 0.617934 | 0.106400 |
| 0 | 097 | 0.125153 | 0.358135 | 0.591277 |
| 0 | 098 | 0.413472 | 0.854541 | 0.082146 |

|   |      |          |          |          |
|---|------|----------|----------|----------|
| 0 | 099  | 0.904355 | 0.858016 | 0.400609 |
| 0 | 0100 | 0.632715 | 0.353427 | 0.914893 |
| 0 | 0101 | 0.921512 | 0.629088 | 0.427875 |
| 0 | 0102 | 0.615463 | 0.121011 | 0.909701 |
| 0 | 0103 | 0.118084 | 0.063317 | 0.412326 |
| 0 | 0104 | 0.423158 | 0.560460 | 0.930589 |
| 0 | 0105 | 0.100130 | 0.439058 | 0.443309 |
| 0 | 0106 | 0.436558 | 0.936646 | 0.934615 |
| 0 | 0107 | 0.912837 | 0.920219 | 0.572552 |
| 0 | 0108 | 0.626259 | 0.417945 | 0.086243 |
| 0 | 0109 | 0.946837 | 0.541455 | 0.567672 |
| 0 | 0110 | 0.593294 | 0.040538 | 0.059107 |
| 0 | 0111 | 0.140340 | 0.039941 | 0.220443 |
| 0 | 0112 | 0.398801 | 0.543241 | 0.736343 |
| 0 | 0113 | 0.143082 | 0.421220 | 0.259324 |
| 0 | 0114 | 0.394455 | 0.927472 | 0.747734 |
| 0 | 0115 | 0.892731 | 0.948862 | 0.763636 |
| 0 | 0116 | 0.645756 | 0.448965 | 0.277109 |
| 0 | 0117 | 0.902117 | 0.556603 | 0.752618 |
| 0 | 0118 | 0.634880 | 0.060095 | 0.244989 |
| 0 | 0119 | 0.102460 | 0.942233 | 0.339823 |
| 0 | 0120 | 0.436906 | 0.441589 | 0.849000 |
| 0 | 0121 | 0.112197 | 0.542339 | 0.321848 |
| 0 | 0122 | 0.432023 | 0.043843 | 0.820908 |
| 0 | 0123 | 0.937456 | 0.040835 | 0.640229 |
| 0 | 0124 | 0.601374 | 0.539468 | 0.150758 |
| 0 | 0125 | 0.936409 | 0.437632 | 0.686923 |
| 0 | 0126 | 0.610928 | 0.938626 | 0.181487 |
| 0 | 0127 | 0.226082 | 0.121950 | 0.141828 |
| 0 | 0128 | 0.314929 | 0.629470 | 0.661617 |
| 0 | 0129 | 0.221229 | 0.356730 | 0.138829 |
| 0 | 0130 | 0.328337 | 0.870536 | 0.604701 |
| 0 | 0131 | 0.819891 | 0.856505 | 0.848058 |
| 0 | 0132 | 0.726724 | 0.361770 | 0.357166 |
| 0 | 0133 | 0.832774 | 0.616524 | 0.889667 |
| 0 | 0134 | 0.713118 | 0.122211 | 0.368999 |
| 0 | 0135 | 0.517421 | 0.848156 | 0.204721 |
| 0 | 0136 | 0.026516 | 0.344894 | 0.720151 |
| 0 | 0137 | 0.517014 | 0.631317 | 0.214324 |
| 0 | 0138 | 0.023593 | 0.130925 | 0.705536 |
| 0 | 0139 | 0.520961 | 0.136323 | 0.774101 |
| 0 | 0140 | 0.016151 | 0.630681 | 0.291150 |
| 0 | 0141 | 0.528398 | 0.353565 | 0.794897 |
| 0 | 0142 | 0.011679 | 0.854460 | 0.287005 |

|   |      |          |          |          |
|---|------|----------|----------|----------|
| 0 | 0143 | 0.401496 | 0.820636 | 0.273537 |
| 0 | 0144 | 0.148786 | 0.323739 | 0.778244 |
| 0 | 0145 | 0.402556 | 0.670416 | 0.290067 |
| 0 | 0146 | 0.140700 | 0.150936 | 0.780232 |
| 0 | 0147 | 0.644632 | 0.149893 | 0.722520 |
| 0 | 0148 | 0.893828 | 0.649206 | 0.237933 |
| 0 | 0149 | 0.645299 | 0.328907 | 0.720814 |
| 0 | 0150 | 0.896588 | 0.821513 | 0.211137 |
| 0 | 0151 | 0.456586 | 0.738060 | 0.143279 |
| 0 | 0152 | 0.091541 | 0.239222 | 0.654007 |
| 0 | 0153 | 0.589939 | 0.240224 | 0.840414 |
| 0 | 0154 | 0.953441 | 0.742455 | 0.343949 |
| 0 | 0155 | 0.325562 | 0.814008 | 0.427338 |
| 0 | 0156 | 0.210986 | 0.337514 | 0.946745 |
| 0 | 0157 | 0.342202 | 0.653653 | 0.470114 |
| 0 | 0158 | 0.205326 | 0.137167 | 0.948764 |
| 0 | 0159 | 0.713506 | 0.152570 | 0.560267 |
| 0 | 0160 | 0.826610 | 0.660528 | 0.075266 |
| 0 | 0161 | 0.707221 | 0.344717 | 0.550700 |
| 0 | 0162 | 0.833805 | 0.845658 | 0.042890 |
| 0 | 0163 | 0.263231 | 0.855539 | 0.243825 |
| 0 | 0164 | 0.277280 | 0.350735 | 0.779661 |
| 0 | 0165 | 0.260969 | 0.666234 | 0.294310 |
| 0 | 0166 | 0.271495 | 0.166685 | 0.787502 |
| 0 | 0167 | 0.773524 | 0.127972 | 0.730901 |
| 0 | 0168 | 0.765906 | 0.622612 | 0.240152 |
| 0 | 0169 | 0.776381 | 0.318811 | 0.710998 |
| 0 | 0170 | 0.765370 | 0.819830 | 0.202914 |
| 0 | 0171 | 0.290240 | 0.746147 | 0.587234 |
| 0 | 0172 | 0.245161 | 0.238399 | 0.063813 |
| 0 | 0173 | 0.742361 | 0.244022 | 0.429279 |
| 0 | 0174 | 0.799619 | 0.741019 | 0.928340 |
| 0 | 0175 | 0.212997 | 0.842761 | 0.518385 |
| 0 | 0176 | 0.329079 | 0.337526 | 0.029962 |
| 0 | 0177 | 0.216862 | 0.641367 | 0.529592 |
| 0 | 0178 | 0.326782 | 0.138765 | 0.018943 |
| 0 | 0179 | 0.826033 | 0.144653 | 0.461789 |
| 0 | 0180 | 0.717305 | 0.641951 | 0.972772 |
| 0 | 0181 | 0.827504 | 0.340452 | 0.479254 |
| 0 | 0182 | 0.715021 | 0.839972 | 0.963026 |
| 0 | 0183 | 0.133981 | 0.741002 | 0.567029 |
| 0 | 0184 | 0.409557 | 0.235812 | 0.071770 |
| 0 | 0185 | 0.910864 | 0.244736 | 0.426715 |
| 0 | 0186 | 0.632188 | 0.739495 | 0.929302 |



|    |       |          |          |          |
|----|-------|----------|----------|----------|
| O  | O187  | 0.100088 | 0.824060 | 0.423757 |
| O  | O188  | 0.442779 | 0.323751 | 0.935291 |
| O  | O189  | 0.106426 | 0.653473 | 0.426634 |
| O  | O190  | 0.436496 | 0.158333 | 0.918493 |
| O  | O191  | 0.932119 | 0.162885 | 0.573298 |
| O  | O192  | 0.610682 | 0.661747 | 0.083142 |
| O  | O193  | 0.940558 | 0.328327 | 0.574649 |
| O  | O194  | 0.603304 | 0.833285 | 0.061549 |
| O  | O195  | 0.134227 | 0.834366 | 0.233189 |
| O  | O196  | 0.404499 | 0.332938 | 0.747777 |
| O  | O197  | 0.136796 | 0.657511 | 0.234010 |
| O  | O198  | 0.395978 | 0.154660 | 0.730151 |
| O  | O199  | 0.901055 | 0.138783 | 0.762068 |
| O  | O200  | 0.638929 | 0.637510 | 0.273291 |
| O  | O201  | 0.902214 | 0.321402 | 0.762891 |
| O  | O202  | 0.639226 | 0.818143 | 0.250182 |
| O  | O203  | 0.215418 | 0.746668 | 0.152476 |
| O  | O204  | 0.320188 | 0.252059 | 0.661029 |
| O  | O205  | 0.821430 | 0.230534 | 0.836756 |
| O  | O206  | 0.721120 | 0.732530 | 0.332811 |
| Al | Al207 | 0.329764 | 0.865660 | 0.319393 |
| Al | Al208 | 0.331216 | 0.628699 | 0.338288 |
| Si | Si209 | 0.711877 | 0.653118 | 0.316493 |
| Si | Si210 | 0.437376 | 0.044976 | 0.172662 |
| Si | Si211 | 0.101404 | 0.550246 | 0.682102 |
| Si | Si212 | 0.450821 | 0.430399 | 0.175230 |
| Si | Si213 | 0.087895 | 0.936756 | 0.659689 |
| Si | Si214 | 0.595388 | 0.931701 | 0.814923 |
| Si | Si215 | 0.943128 | 0.437932 | 0.324793 |
| Si | Si216 | 0.592786 | 0.543365 | 0.841049 |
| Si | Si217 | 0.946597 | 0.048086 | 0.328628 |
| Si | Si218 | 0.334748 | 0.024609 | 0.333780 |
| Si | Si219 | 0.204028 | 0.522589 | 0.840428 |
| Si | Si220 | 0.338395 | 0.465764 | 0.325416 |
| Si | Si221 | 0.204490 | 0.968037 | 0.806547 |
| Si | Si222 | 0.700721 | 0.957080 | 0.656481 |
| Si | Si223 | 0.838223 | 0.460342 | 0.163938 |
| Si | Si224 | 0.709925 | 0.516003 | 0.692185 |
| Si | Si225 | 0.830843 | 0.014556 | 0.181608 |
| Si | Si226 | 0.295343 | 0.057649 | 0.547528 |
| Si | Si227 | 0.241002 | 0.548680 | 0.059665 |
| Si | Si228 | 0.299570 | 0.437471 | 0.540535 |
| Si | Si229 | 0.236938 | 0.930390 | 0.024233 |
| Si | Si230 | 0.735872 | 0.929861 | 0.438829 |

|    |       |          |          |          |
|----|-------|----------|----------|----------|
| Si | Si231 | 0.801710 | 0.426113 | 0.948507 |
| Si | Si232 | 0.747315 | 0.550963 | 0.476890 |
| Si | Si233 | 0.792076 | 0.045737 | 0.964686 |
| Si | Si234 | 0.141195 | 0.053794 | 0.526611 |
| Si | Si235 | 0.396115 | 0.549656 | 0.043161 |
| Si | Si236 | 0.145173 | 0.428607 | 0.540965 |
| Si | Si237 | 0.391276 | 0.924794 | 0.031830 |
| Si | Si238 | 0.890909 | 0.928138 | 0.457321 |
| Si | Si239 | 0.646868 | 0.423994 | 0.970217 |
| Si | Si240 | 0.901255 | 0.556710 | 0.472157 |
| Si | Si241 | 0.637759 | 0.051581 | 0.960996 |
| Si | Si242 | 0.095107 | 0.021165 | 0.314791 |
| Si | Si243 | 0.444255 | 0.521094 | 0.829587 |
| Si | Si244 | 0.093632 | 0.463708 | 0.328849 |
| Si | Si245 | 0.445432 | 0.964186 | 0.822071 |
| Si | Si246 | 0.939095 | 0.962067 | 0.668173 |
| Si | Si247 | 0.599673 | 0.460761 | 0.180876 |
| Si | Si248 | 0.953137 | 0.516733 | 0.682030 |
| Si | Si249 | 0.587283 | 0.016244 | 0.173679 |
| Si | Si250 | 0.215993 | 0.047112 | 0.184870 |
| Si | Si251 | 0.323777 | 0.552734 | 0.699595 |
| Si | Si252 | 0.212468 | 0.425558 | 0.200239 |
| Si | Si253 | 0.328852 | 0.933541 | 0.680060 |
| Si | Si254 | 0.819890 | 0.931582 | 0.803390 |
| Si | Si255 | 0.720285 | 0.436858 | 0.314401 |
| Si | Si256 | 0.835431 | 0.551907 | 0.817800 |
| Si | Si257 | 0.703726 | 0.054318 | 0.305487 |
| Si | Si258 | 0.447421 | 0.815927 | 0.173403 |
| Si | Si259 | 0.097967 | 0.316646 | 0.686179 |
| Si | Si260 | 0.445846 | 0.663287 | 0.187467 |
| Si | Si261 | 0.095970 | 0.160817 | 0.681571 |
| Si | Si262 | 0.592628 | 0.161932 | 0.811527 |
| Si | Si263 | 0.946670 | 0.663116 | 0.324971 |
| Si | Si264 | 0.598958 | 0.318888 | 0.817845 |
| Si | Si265 | 0.941864 | 0.819150 | 0.310732 |
| Si | Si266 | 0.207199 | 0.363849 | 0.833963 |
| Si | Si267 | 0.208692 | 0.125393 | 0.829843 |
| Si | Si268 | 0.706913 | 0.116786 | 0.666904 |
| Si | Si269 | 0.833636 | 0.617722 | 0.176345 |
| Si | Si270 | 0.711662 | 0.357227 | 0.669547 |
| Si | Si271 | 0.831982 | 0.855627 | 0.162309 |
| Si | Si272 | 0.288708 | 0.819285 | 0.534299 |
| Si | Si273 | 0.251962 | 0.317505 | 0.045163 |
| Si | Si274 | 0.288818 | 0.667205 | 0.563474 |

|    |       |          |          |          |
|----|-------|----------|----------|----------|
| Si | Si275 | 0.250779 | 0.159446 | 0.042687 |
| Si | Si276 | 0.748876 | 0.165556 | 0.454641 |
| Si | Si277 | 0.794083 | 0.664712 | 0.965845 |
| Si | Si278 | 0.751047 | 0.322213 | 0.455099 |
| Si | Si279 | 0.792146 | 0.820315 | 0.946831 |
| Si | Si280 | 0.136725 | 0.818076 | 0.530043 |
| Si | Si281 | 0.405451 | 0.313865 | 0.040601 |
| Si | Si282 | 0.138903 | 0.663338 | 0.534517 |
| Si | Si283 | 0.403623 | 0.160611 | 0.028099 |
| Si | Si284 | 0.902894 | 0.167533 | 0.461392 |
| Si | Si285 | 0.640365 | 0.664024 | 0.970951 |
| Si | Si286 | 0.904831 | 0.320760 | 0.467718 |
| Si | Si287 | 0.638144 | 0.818174 | 0.956055 |
| Si | Si288 | 0.087974 | 0.863809 | 0.319847 |
| Si | Si289 | 0.453022 | 0.363175 | 0.831590 |
| Si | Si290 | 0.093301 | 0.620997 | 0.317969 |
| Si | Si291 | 0.446072 | 0.123220 | 0.810945 |
| Si | Si292 | 0.948524 | 0.118267 | 0.670635 |
| Si | Si293 | 0.592384 | 0.617279 | 0.180260 |
| Si | Si294 | 0.951356 | 0.358102 | 0.685518 |
| Si | Si295 | 0.593462 | 0.859909 | 0.173697 |
| Si | Si296 | 0.205081 | 0.825221 | 0.177748 |
| Si | Si297 | 0.331970 | 0.327650 | 0.698752 |
| Si | Si298 | 0.212553 | 0.672399 | 0.200112 |
| Si | Si299 | 0.322300 | 0.174712 | 0.694811 |
| Si | Si300 | 0.829174 | 0.152467 | 0.809376 |
| Si | Si301 | 0.828077 | 0.307227 | 0.801601 |
| Si | Si302 | 0.713329 | 0.808140 | 0.292632 |
| Zn | Zn303 | 0.411403 | 0.755786 | 0.383939 |

**M-C<sub>4</sub>H<sub>9</sub>Zn-OH-Zn<sup>2+</sup> (Fig. 3/M2)** Total energy = -1927.50322408 eV

data\_

\_audit\_creation\_method 'Materials Studio'

\_cell\_length\_a 20.357621

\_cell\_length\_b 20.050598

\_cell\_length\_c 13.476578

\_cell\_angle\_alpha 90.000000

\_cell\_angle\_beta 90.000000

\_cell\_angle\_gamma 90.000000

\_symmetry\_space\_group\_name\_H-M 'P1'

loop\_

\_atom\_site\_type\_symbol

\_atom\_site\_label

| <u>_atom_site_fract_x</u> |     | <u>_atom_site_fract_y</u> |          | <u>_atom_site_fract_z</u> |
|---------------------------|-----|---------------------------|----------|---------------------------|
| H                         | H1  | 0.502039                  | 0.829361 | 0.515342                  |
| H                         | H2  | 0.380276                  | 0.625582 | 0.494828                  |
| H                         | H3  | 0.547179                  | 0.799512 | 0.413148                  |
| H                         | H4  | 0.541290                  | 0.682247 | 0.485683                  |
| H                         | H5  | 0.498953                  | 0.714697 | 0.589239                  |
| H                         | H6  | 0.596905                  | 0.791878 | 0.619707                  |
| H                         | H7  | 0.638499                  | 0.750294 | 0.523539                  |
| H                         | H8  | 0.588584                  | 0.687179 | 0.717095                  |
| H                         | H9  | 0.671794                  | 0.699494 | 0.683685                  |
| H                         | H10 | 0.623213                  | 0.641090 | 0.618062                  |
| C                         | C11 | 0.510165                  | 0.785332 | 0.468378                  |
| C                         | C12 | 0.535079                  | 0.727275 | 0.531406                  |
| C                         | C13 | 0.601010                  | 0.743752 | 0.581306                  |
| C                         | C14 | 0.622500                  | 0.689831 | 0.654231                  |
| O                         | O15 | 0.510267                  | 0.023803 | 0.208127                  |
| O                         | O16 | 0.024819                  | 0.532152 | 0.717856                  |
| O                         | O17 | 0.524838                  | 0.437885 | 0.211743                  |
| O                         | O18 | 0.011912                  | 0.936177 | 0.693433                  |
| O                         | O19 | 0.518760                  | 0.948054 | 0.784040                  |
| O                         | O20 | 0.017265                  | 0.452869 | 0.293661                  |
| O                         | O21 | 0.516649                  | 0.539801 | 0.799537                  |
| O                         | O22 | 0.019098                  | 0.039874 | 0.285139                  |
| O                         | O23 | 0.391586                  | 0.059188 | 0.270473                  |
| O                         | O24 | 0.142913                  | 0.562592 | 0.783860                  |
| O                         | O25 | 0.402241                  | 0.434362 | 0.273772                  |
| O                         | O26 | 0.133535                  | 0.950863 | 0.753210                  |
| O                         | O27 | 0.636819                  | 0.928620 | 0.712809                  |
| O                         | O28 | 0.898765                  | 0.429998 | 0.222848                  |
| O                         | O29 | 0.640204                  | 0.533050 | 0.747383                  |
| O                         | O30 | 0.893259                  | 0.046377 | 0.238299                  |
| O                         | O31 | 0.439328                  | 0.107596 | 0.101592                  |
| O                         | O32 | 0.098755                  | 0.621047 | 0.621876                  |
| O                         | O33 | 0.441051                  | 0.356561 | 0.125830                  |
| O                         | O34 | 0.104945                  | 0.866567 | 0.606471                  |
| O                         | O35 | 0.599216                  | 0.860297 | 0.869004                  |
| O                         | O36 | 0.938540                  | 0.369294 | 0.386547                  |
| O                         | O37 | 0.601114                  | 0.614211 | 0.894972                  |
| O                         | O38 | 0.941822                  | 0.118587 | 0.387907                  |
| O                         | O39 | 0.402405                  | 0.980370 | 0.115214                  |
| O                         | O40 | 0.131317                  | 0.492893 | 0.618317                  |
| O                         | O41 | 0.431959                  | 0.487484 | 0.096987                  |

|   |     |          |          |          |
|---|-----|----------|----------|----------|
| 0 | 042 | 0.096995 | 0.996950 | 0.576074 |
| 0 | 043 | 0.623986 | 0.990399 | 0.884763 |
| 0 | 044 | 0.910367 | 0.499306 | 0.387229 |
| 0 | 045 | 0.601345 | 0.483189 | 0.921085 |
| 0 | 046 | 0.931821 | 0.986766 | 0.405745 |
| 0 | 047 | 0.330044 | 0.062459 | 0.441235 |
| 0 | 048 | 0.199242 | 0.549588 | 0.958415 |
| 0 | 049 | 0.341101 | 0.450861 | 0.443322 |
| 0 | 050 | 0.198713 | 0.945363 | 0.919942 |
| 0 | 051 | 0.701277 | 0.923933 | 0.547283 |
| 0 | 052 | 0.834744 | 0.424394 | 0.055113 |
| 0 | 053 | 0.702511 | 0.540297 | 0.576596 |
| 0 | 054 | 0.832957 | 0.035022 | 0.065459 |
| 0 | 055 | 0.345090 | 0.945894 | 0.348777 |
| 0 | 056 | 0.187878 | 0.444472 | 0.835934 |
| 0 | 057 | 0.335796 | 0.546121 | 0.307571 |
| 0 | 058 | 0.218009 | 0.047584 | 0.799190 |
| 0 | 059 | 0.696052 | 0.038127 | 0.648616 |
| 0 | 060 | 0.847310 | 0.541043 | 0.146604 |
| 0 | 061 | 0.721528 | 0.435780 | 0.693392 |
| 0 | 062 | 0.831237 | 0.934081 | 0.192051 |
| 0 | 063 | 0.262469 | 0.036935 | 0.278720 |
| 0 | 064 | 0.271809 | 0.541843 | 0.797773 |
| 0 | 065 | 0.271954 | 0.431520 | 0.280394 |
| 0 | 066 | 0.261829 | 0.929052 | 0.747931 |
| 0 | 067 | 0.768077 | 0.937224 | 0.713020 |
| 0 | 068 | 0.768658 | 0.448737 | 0.220071 |
| 0 | 069 | 0.768334 | 0.553871 | 0.745460 |
| 0 | 070 | 0.763214 | 0.044086 | 0.229427 |
| 0 | 071 | 0.300541 | 0.130262 | 0.602074 |
| 0 | 072 | 0.230562 | 0.620430 | 0.116802 |
| 0 | 073 | 0.326335 | 0.375349 | 0.599345 |
| 0 | 074 | 0.204845 | 0.864804 | 0.070398 |
| 0 | 075 | 0.724315 | 0.859398 | 0.382358 |
| 0 | 076 | 0.808753 | 0.354452 | 0.894167 |
| 0 | 077 | 0.720027 | 0.620064 | 0.424447 |
| 0 | 078 | 0.818202 | 0.112457 | 0.911764 |
| 0 | 079 | 0.217585 | 0.037555 | 0.535311 |
| 0 | 080 | 0.316294 | 0.534433 | 0.041737 |
| 0 | 081 | 0.220685 | 0.429806 | 0.512049 |
| 0 | 082 | 0.314981 | 0.920988 | 0.997388 |
| 0 | 083 | 0.811558 | 0.948011 | 0.447582 |
| 0 | 084 | 0.722416 | 0.444092 | 0.959520 |
| 0 | 085 | 0.822475 | 0.556027 | 0.506381 |

|   |      |          |          |          |
|---|------|----------|----------|----------|
| 0 | 086  | 0.713346 | 0.053586 | 0.992378 |
| 0 | 087  | 0.329984 | 0.002085 | 0.617418 |
| 0 | 088  | 0.209140 | 0.489278 | 0.129984 |
| 0 | 089  | 0.303348 | 0.504729 | 0.612920 |
| 0 | 090  | 0.230940 | 0.994290 | 0.096809 |
| 0 | 091  | 0.697564 | 0.990051 | 0.379086 |
| 0 | 092  | 0.834655 | 0.483623 | 0.879768 |
| 0 | 093  | 0.735601 | 0.489750 | 0.401149 |
| 0 | 094  | 0.799131 | 0.982537 | 0.891714 |
| 0 | 095  | 0.126383 | 0.126159 | 0.583485 |
| 0 | 096  | 0.406534 | 0.618000 | 0.110569 |
| 0 | 097  | 0.124398 | 0.361217 | 0.595201 |
| 0 | 098  | 0.414674 | 0.852474 | 0.070340 |
| 0 | 099  | 0.901407 | 0.857059 | 0.401572 |
| 0 | 0100 | 0.631423 | 0.354328 | 0.913151 |
| 0 | 0101 | 0.916524 | 0.629083 | 0.425331 |
| 0 | 0102 | 0.615682 | 0.121629 | 0.909484 |
| 0 | 0103 | 0.117939 | 0.063801 | 0.411107 |
| 0 | 0104 | 0.422825 | 0.560384 | 0.934958 |
| 0 | 0105 | 0.097864 | 0.440247 | 0.445464 |
| 0 | 0106 | 0.436570 | 0.942772 | 0.933683 |
| 0 | 0107 | 0.909676 | 0.920958 | 0.572176 |
| 0 | 0108 | 0.624540 | 0.416961 | 0.085941 |
| 0 | 0109 | 0.945859 | 0.542827 | 0.565346 |
| 0 | 0110 | 0.591431 | 0.041785 | 0.059036 |
| 0 | 0111 | 0.138989 | 0.038586 | 0.219287 |
| 0 | 0112 | 0.395879 | 0.540551 | 0.742357 |
| 0 | 0113 | 0.142167 | 0.420355 | 0.262203 |
| 0 | 0114 | 0.392790 | 0.927280 | 0.748485 |
| 0 | 0115 | 0.892946 | 0.949799 | 0.763540 |
| 0 | 0116 | 0.644667 | 0.447516 | 0.276120 |
| 0 | 0117 | 0.899021 | 0.557078 | 0.749122 |
| 0 | 0118 | 0.633868 | 0.060450 | 0.244307 |
| 0 | 0119 | 0.100723 | 0.942236 | 0.341089 |
| 0 | 0120 | 0.436731 | 0.440794 | 0.855506 |
| 0 | 0121 | 0.111863 | 0.542069 | 0.321880 |
| 0 | 0122 | 0.431024 | 0.045403 | 0.811951 |
| 0 | 0123 | 0.939132 | 0.040724 | 0.639778 |
| 0 | 0124 | 0.600428 | 0.538740 | 0.150305 |
| 0 | 0125 | 0.933844 | 0.438404 | 0.683254 |
| 0 | 0126 | 0.610060 | 0.939030 | 0.179907 |
| 0 | 0127 | 0.223580 | 0.121869 | 0.140492 |
| 0 | 0128 | 0.316493 | 0.628641 | 0.664010 |
| 0 | 0129 | 0.220340 | 0.356483 | 0.140399 |

|   |      |          |          |          |
|---|------|----------|----------|----------|
| 0 | 0130 | 0.328131 | 0.869470 | 0.605300 |
| 0 | 0131 | 0.820578 | 0.856901 | 0.847431 |
| 0 | 0132 | 0.728051 | 0.362671 | 0.356003 |
| 0 | 0133 | 0.832114 | 0.616500 | 0.888780 |
| 0 | 0134 | 0.712422 | 0.122511 | 0.367633 |
| 0 | 0135 | 0.515117 | 0.849676 | 0.199418 |
| 0 | 0136 | 0.024412 | 0.346888 | 0.721220 |
| 0 | 0137 | 0.517332 | 0.631519 | 0.214039 |
| 0 | 0138 | 0.023233 | 0.132542 | 0.705102 |
| 0 | 0139 | 0.520938 | 0.138056 | 0.774358 |
| 0 | 0140 | 0.014916 | 0.629596 | 0.295282 |
| 0 | 0141 | 0.525961 | 0.352282 | 0.794948 |
| 0 | 0142 | 0.008918 | 0.855228 | 0.289537 |
| 0 | 0143 | 0.397060 | 0.823763 | 0.262626 |
| 0 | 0144 | 0.146111 | 0.325062 | 0.781671 |
| 0 | 0145 | 0.404165 | 0.671345 | 0.293243 |
| 0 | 0146 | 0.140952 | 0.152510 | 0.777431 |
| 0 | 0147 | 0.644614 | 0.149456 | 0.721961 |
| 0 | 0148 | 0.895085 | 0.649900 | 0.233554 |
| 0 | 0149 | 0.642534 | 0.331932 | 0.718242 |
| 0 | 0150 | 0.894279 | 0.820261 | 0.211991 |
| 0 | 0151 | 0.456390 | 0.737860 | 0.141682 |
| 0 | 0152 | 0.089985 | 0.241684 | 0.654447 |
| 0 | 0153 | 0.591364 | 0.240869 | 0.839054 |
| 0 | 0154 | 0.952430 | 0.742197 | 0.344601 |
| 0 | 0155 | 0.330904 | 0.813525 | 0.425950 |
| 0 | 0156 | 0.211247 | 0.339219 | 0.947421 |
| 0 | 0157 | 0.337865 | 0.640856 | 0.470804 |
| 0 | 0158 | 0.203681 | 0.136729 | 0.947283 |
| 0 | 0159 | 0.712306 | 0.153614 | 0.558801 |
| 0 | 0160 | 0.825312 | 0.661467 | 0.073981 |
| 0 | 0161 | 0.706148 | 0.344399 | 0.548909 |
| 0 | 0162 | 0.832910 | 0.844957 | 0.042262 |
| 0 | 0163 | 0.256721 | 0.855275 | 0.249684 |
| 0 | 0164 | 0.274179 | 0.354005 | 0.776575 |
| 0 | 0165 | 0.259649 | 0.668716 | 0.296350 |
| 0 | 0166 | 0.271773 | 0.166147 | 0.788107 |
| 0 | 0167 | 0.773860 | 0.129143 | 0.728189 |
| 0 | 0168 | 0.767266 | 0.623277 | 0.241314 |
| 0 | 0169 | 0.773118 | 0.316830 | 0.711119 |
| 0 | 0170 | 0.762936 | 0.822145 | 0.201339 |
| 0 | 0171 | 0.295277 | 0.744063 | 0.582234 |
| 0 | 0172 | 0.242410 | 0.238305 | 0.062673 |
| 0 | 0173 | 0.741841 | 0.244340 | 0.426853 |

|    |       |          |          |          |
|----|-------|----------|----------|----------|
| O  | O174  | 0.799010 | 0.741167 | 0.925944 |
| O  | O175  | 0.216012 | 0.839100 | 0.512728 |
| O  | O176  | 0.328284 | 0.336212 | 0.032378 |
| O  | O177  | 0.214914 | 0.641722 | 0.535843 |
| O  | O178  | 0.324809 | 0.139063 | 0.018243 |
| O  | O179  | 0.825021 | 0.144766 | 0.461134 |
| O  | O180  | 0.716630 | 0.642119 | 0.970924 |
| O  | O181  | 0.827129 | 0.339666 | 0.480498 |
| O  | O182  | 0.714503 | 0.840225 | 0.959682 |
| O  | O183  | 0.133169 | 0.742513 | 0.566935 |
| O  | O184  | 0.408947 | 0.234168 | 0.073096 |
| O  | O185  | 0.910587 | 0.244195 | 0.426583 |
| O  | O186  | 0.631390 | 0.739601 | 0.928155 |
| O  | O187  | 0.102533 | 0.822433 | 0.418397 |
| O  | O188  | 0.440825 | 0.321323 | 0.935554 |
| O  | O189  | 0.105281 | 0.651354 | 0.430922 |
| O  | O190  | 0.435686 | 0.156395 | 0.919362 |
| O  | O191  | 0.929889 | 0.163204 | 0.575049 |
| O  | O192  | 0.610085 | 0.660779 | 0.081182 |
| O  | O193  | 0.941353 | 0.328754 | 0.572616 |
| O  | O194  | 0.603343 | 0.833866 | 0.059682 |
| O  | O195  | 0.128830 | 0.836986 | 0.225170 |
| O  | O196  | 0.401486 | 0.335499 | 0.748484 |
| O  | O197  | 0.134991 | 0.659069 | 0.238761 |
| O  | O198  | 0.396511 | 0.159538 | 0.730602 |
| O  | O199  | 0.900903 | 0.136864 | 0.763921 |
| O  | O200  | 0.639831 | 0.636684 | 0.270920 |
| O  | O201  | 0.899636 | 0.322513 | 0.759589 |
| O  | O202  | 0.636775 | 0.818393 | 0.248795 |
| O  | O203  | 0.212023 | 0.747274 | 0.152870 |
| O  | O204  | 0.317362 | 0.253501 | 0.661710 |
| O  | O205  | 0.822027 | 0.230540 | 0.836326 |
| O  | O206  | 0.720191 | 0.733396 | 0.330208 |
| Al | Al207 | 0.327464 | 0.864803 | 0.316372 |
| Al | Al208 | 0.331632 | 0.630087 | 0.328945 |
| Si | Si209 | 0.711940 | 0.653756 | 0.315582 |
| Si | Si210 | 0.435963 | 0.042914 | 0.173918 |
| Si | Si211 | 0.098799 | 0.551820 | 0.684811 |
| Si | Si212 | 0.449089 | 0.429321 | 0.177226 |
| Si | Si213 | 0.087689 | 0.937711 | 0.657157 |
| Si | Si214 | 0.594181 | 0.932168 | 0.813937 |
| Si | Si215 | 0.941646 | 0.437931 | 0.323536 |
| Si | Si216 | 0.591290 | 0.542766 | 0.840866 |
| Si | Si217 | 0.945624 | 0.047880 | 0.329126 |



|    |       |          |          |          |
|----|-------|----------|----------|----------|
| Si | Si218 | 0.332579 | 0.024090 | 0.334492 |
| Si | Si219 | 0.200198 | 0.524110 | 0.844934 |
| Si | Si220 | 0.337413 | 0.467065 | 0.324945 |
| Si | Si221 | 0.203073 | 0.968065 | 0.805451 |
| Si | Si222 | 0.700818 | 0.957568 | 0.656302 |
| Si | Si223 | 0.837361 | 0.461227 | 0.162005 |
| Si | Si224 | 0.708161 | 0.515636 | 0.690884 |
| Si | Si225 | 0.830247 | 0.014896 | 0.181648 |
| Si | Si226 | 0.294652 | 0.058131 | 0.548233 |
| Si | Si227 | 0.238925 | 0.549177 | 0.063125 |
| Si | Si228 | 0.297504 | 0.439387 | 0.541635 |
| Si | Si229 | 0.237217 | 0.931041 | 0.022865 |
| Si | Si230 | 0.733888 | 0.930095 | 0.438312 |
| Si | Si231 | 0.800079 | 0.426418 | 0.946948 |
| Si | Si232 | 0.745145 | 0.551650 | 0.476515 |
| Si | Si233 | 0.790805 | 0.045872 | 0.965005 |
| Si | Si234 | 0.140189 | 0.056324 | 0.526115 |
| Si | Si235 | 0.394260 | 0.550271 | 0.047000 |
| Si | Si236 | 0.143586 | 0.431083 | 0.542739 |
| Si | Si237 | 0.391515 | 0.924960 | 0.028964 |
| Si | Si238 | 0.888638 | 0.928002 | 0.456506 |
| Si | Si239 | 0.645338 | 0.424231 | 0.970184 |
| Si | Si240 | 0.898653 | 0.556459 | 0.470894 |
| Si | Si241 | 0.636363 | 0.051760 | 0.961180 |
| Si | Si242 | 0.094104 | 0.021089 | 0.314582 |
| Si | Si243 | 0.443176 | 0.520169 | 0.834635 |
| Si | Si244 | 0.092355 | 0.463660 | 0.330181 |
| Si | Si245 | 0.444671 | 0.965972 | 0.819060 |
| Si | Si246 | 0.938627 | 0.961803 | 0.666912 |
| Si | Si247 | 0.598265 | 0.460123 | 0.180507 |
| Si | Si248 | 0.950692 | 0.517433 | 0.679590 |
| Si | Si249 | 0.586100 | 0.016560 | 0.173324 |
| Si | Si250 | 0.214688 | 0.047076 | 0.184380 |
| Si | Si251 | 0.321357 | 0.551982 | 0.706006 |
| Si | Si252 | 0.211542 | 0.424885 | 0.202922 |
| Si | Si253 | 0.327637 | 0.932969 | 0.679822 |
| Si | Si254 | 0.820145 | 0.932149 | 0.803474 |
| Si | Si255 | 0.719549 | 0.437496 | 0.313073 |
| Si | Si256 | 0.833070 | 0.552339 | 0.816006 |
| Si | Si257 | 0.702319 | 0.054159 | 0.305474 |
| Si | Si258 | 0.445466 | 0.816332 | 0.167031 |
| Si | Si259 | 0.096116 | 0.318726 | 0.688395 |
| Si | Si260 | 0.445964 | 0.664266 | 0.190143 |
| Si | Si261 | 0.095208 | 0.163003 | 0.680042 |

|    |       |          |          |          |
|----|-------|----------|----------|----------|
| Si | Si262 | 0.593045 | 0.162457 | 0.811160 |
| Si | Si263 | 0.945040 | 0.663057 | 0.324501 |
| Si | Si264 | 0.597685 | 0.319694 | 0.816342 |
| Si | Si265 | 0.939498 | 0.818780 | 0.311716 |
| Si | Si266 | 0.205268 | 0.365529 | 0.834994 |
| Si | Si267 | 0.207952 | 0.125490 | 0.828294 |
| Si | Si268 | 0.706895 | 0.117298 | 0.665249 |
| Si | Si269 | 0.833656 | 0.618481 | 0.174589 |
| Si | Si270 | 0.710274 | 0.357395 | 0.667694 |
| Si | Si271 | 0.830817 | 0.855724 | 0.161519 |
| Si | Si272 | 0.292191 | 0.818114 | 0.531119 |
| Si | Si273 | 0.250868 | 0.317429 | 0.046232 |
| Si | Si274 | 0.287256 | 0.665407 | 0.567787 |
| Si | Si275 | 0.248675 | 0.159332 | 0.041587 |
| Si | Si276 | 0.747981 | 0.165966 | 0.453208 |
| Si | Si277 | 0.793252 | 0.665078 | 0.964239 |
| Si | Si278 | 0.750797 | 0.322298 | 0.453979 |
| Si | Si279 | 0.791705 | 0.820407 | 0.945251 |
| Si | Si280 | 0.138734 | 0.818495 | 0.525263 |
| Si | Si281 | 0.404592 | 0.312265 | 0.042040 |
| Si | Si282 | 0.136763 | 0.664281 | 0.538414 |
| Si | Si283 | 0.402055 | 0.159155 | 0.028424 |
| Si | Si284 | 0.901938 | 0.167252 | 0.462310 |
| Si | Si285 | 0.639654 | 0.663991 | 0.969105 |
| Si | Si286 | 0.904393 | 0.320387 | 0.466712 |
| Si | Si287 | 0.637518 | 0.818411 | 0.954023 |
| Si | Si288 | 0.086043 | 0.864252 | 0.317453 |
| Si | Si289 | 0.451101 | 0.362533 | 0.833377 |
| Si | Si290 | 0.092059 | 0.620517 | 0.321246 |
| Si | Si291 | 0.445817 | 0.124782 | 0.809563 |
| Si | Si292 | 0.948215 | 0.118222 | 0.671311 |
| Si | Si293 | 0.592159 | 0.616880 | 0.179025 |
| Si | Si294 | 0.949654 | 0.359081 | 0.683647 |
| Si | Si295 | 0.591667 | 0.860441 | 0.171429 |
| Si | Si296 | 0.201796 | 0.826128 | 0.176828 |
| Si | Si297 | 0.329569 | 0.329378 | 0.697666 |
| Si | Si298 | 0.210196 | 0.673816 | 0.202676 |
| Si | Si299 | 0.322061 | 0.176127 | 0.695238 |
| Si | Si300 | 0.828637 | 0.152382 | 0.808871 |
| Si | Si301 | 0.826233 | 0.307174 | 0.800327 |
| Si | Si302 | 0.711051 | 0.809081 | 0.290898 |
| Zn | Zn303 | 0.428790 | 0.777083 | 0.392363 |

**TS-C<sub>4</sub>H<sub>9</sub>Zn-HTransfer-Concerted-Zn<sup>2+</sup> (Fig. 3/TS2)** Total energy = -1926.20592093 eV

data\_

\_audit\_creation\_method 'Materials Studio'

\_cell\_length\_a 20.357621

\_cell\_length\_b 20.050598

\_cell\_length\_c 13.476578

\_cell\_angle\_alpha 90.000000

\_cell\_angle\_beta 90.000000

\_cell\_angle\_gamma 90.000000

\_symmetry\_space\_group\_name\_H-M 'P1'

loop\_

\_atom\_site\_type\_symbol

\_atom\_site\_label

\_atom\_site\_fract\_x

\_atom\_site\_fract\_y

\_atom\_site\_fract\_z

|   |     |          |          |          |
|---|-----|----------|----------|----------|
| H | H1  | 0.521070 | 0.798646 | 0.467389 |
| H | H2  | 0.405874 | 0.657030 | 0.525199 |
| H | H3  | 0.537250 | 0.720052 | 0.407041 |
| H | H4  | 0.526755 | 0.669355 | 0.566742 |
| H | H5  | 0.440260 | 0.671941 | 0.555289 |
| H | H6  | 0.455235 | 0.799234 | 0.627015 |
| H | H7  | 0.536626 | 0.778791 | 0.657085 |
| H | H8  | 0.414552 | 0.704477 | 0.733204 |
| H | H9  | 0.467428 | 0.757018 | 0.801966 |
| H | H10 | 0.496691 | 0.679673 | 0.757396 |
| C | C11 | 0.504799 | 0.746968 | 0.457669 |
| C | C12 | 0.497726 | 0.714448 | 0.553883 |
| C | C13 | 0.487392 | 0.757086 | 0.644760 |
| C | C14 | 0.465147 | 0.722104 | 0.739702 |
| O | O15 | 0.513243 | 0.026436 | 0.207507 |
| O | O16 | 0.022268 | 0.536047 | 0.715255 |
| O | O17 | 0.524732 | 0.438644 | 0.207723 |
| O | O18 | 0.014466 | 0.936649 | 0.692661 |
| O | O19 | 0.522216 | 0.951957 | 0.780227 |
| O | O20 | 0.016450 | 0.454409 | 0.287652 |
| O | O21 | 0.514347 | 0.543806 | 0.798191 |
| O | O22 | 0.022405 | 0.041538 | 0.286195 |
| O | O23 | 0.394473 | 0.058719 | 0.271389 |
| O | O24 | 0.141062 | 0.560242 | 0.783533 |
| O | O25 | 0.401304 | 0.431024 | 0.266843 |
| O | O26 | 0.136839 | 0.944839 | 0.751501 |
| O | O27 | 0.641315 | 0.927833 | 0.714373 |
| O | O28 | 0.898460 | 0.430529 | 0.216956 |

|   |     |          |          |          |
|---|-----|----------|----------|----------|
| 0 | 029 | 0.636027 | 0.537799 | 0.737495 |
| 0 | 030 | 0.896900 | 0.047118 | 0.238416 |
| 0 | 031 | 0.441116 | 0.111942 | 0.105370 |
| 0 | 032 | 0.100587 | 0.622357 | 0.622806 |
| 0 | 033 | 0.442879 | 0.360230 | 0.112529 |
| 0 | 034 | 0.104750 | 0.867244 | 0.598648 |
| 0 | 035 | 0.598521 | 0.865090 | 0.873049 |
| 0 | 036 | 0.937940 | 0.369962 | 0.380226 |
| 0 | 037 | 0.601839 | 0.619439 | 0.884837 |
| 0 | 038 | 0.944074 | 0.120776 | 0.386874 |
| 0 | 039 | 0.406327 | 0.984180 | 0.111322 |
| 0 | 040 | 0.127591 | 0.492564 | 0.616941 |
| 0 | 041 | 0.432996 | 0.491770 | 0.095904 |
| 0 | 042 | 0.100069 | 0.998485 | 0.578700 |
| 0 | 043 | 0.627268 | 0.995038 | 0.881386 |
| 0 | 044 | 0.909109 | 0.499867 | 0.381531 |
| 0 | 045 | 0.602900 | 0.488447 | 0.915344 |
| 0 | 046 | 0.935021 | 0.989198 | 0.407355 |
| 0 | 047 | 0.331632 | 0.063933 | 0.440418 |
| 0 | 048 | 0.201177 | 0.554396 | 0.954117 |
| 0 | 049 | 0.339730 | 0.444062 | 0.437246 |
| 0 | 050 | 0.201454 | 0.942503 | 0.919353 |
| 0 | 051 | 0.704991 | 0.925100 | 0.547682 |
| 0 | 052 | 0.834238 | 0.425271 | 0.049843 |
| 0 | 053 | 0.701072 | 0.543584 | 0.570461 |
| 0 | 054 | 0.835635 | 0.039938 | 0.066760 |
| 0 | 055 | 0.349288 | 0.945929 | 0.353220 |
| 0 | 056 | 0.185233 | 0.443372 | 0.845744 |
| 0 | 057 | 0.342202 | 0.545444 | 0.310700 |
| 0 | 058 | 0.213924 | 0.046710 | 0.800198 |
| 0 | 059 | 0.692970 | 0.040239 | 0.644780 |
| 0 | 060 | 0.847752 | 0.541914 | 0.140787 |
| 0 | 061 | 0.715638 | 0.437948 | 0.687128 |
| 0 | 062 | 0.832257 | 0.936889 | 0.189314 |
| 0 | 063 | 0.265844 | 0.033999 | 0.277480 |
| 0 | 064 | 0.270007 | 0.534994 | 0.791016 |
| 0 | 065 | 0.271528 | 0.435997 | 0.272228 |
| 0 | 066 | 0.266016 | 0.931290 | 0.748543 |
| 0 | 067 | 0.771624 | 0.945545 | 0.712574 |
| 0 | 068 | 0.768681 | 0.450377 | 0.215413 |
| 0 | 069 | 0.764878 | 0.554293 | 0.741850 |
| 0 | 070 | 0.766793 | 0.047407 | 0.231907 |
| 0 | 071 | 0.304893 | 0.130455 | 0.603248 |
| 0 | 072 | 0.228773 | 0.620350 | 0.117699 |

|   |      |          |          |          |
|---|------|----------|----------|----------|
| 0 | 073  | 0.315999 | 0.371457 | 0.593368 |
| 0 | 074  | 0.213745 | 0.862363 | 0.070241 |
| 0 | 075  | 0.728036 | 0.858637 | 0.384575 |
| 0 | 076  | 0.808892 | 0.356483 | 0.888022 |
| 0 | 077  | 0.718368 | 0.619404 | 0.415718 |
| 0 | 078  | 0.821272 | 0.116739 | 0.912683 |
| 0 | 079  | 0.220551 | 0.038704 | 0.537731 |
| 0 | 080  | 0.315322 | 0.534642 | 0.043746 |
| 0 | 081  | 0.217373 | 0.434918 | 0.504273 |
| 0 | 082  | 0.319534 | 0.923848 | 0.993905 |
| 0 | 083  | 0.814655 | 0.949208 | 0.446029 |
| 0 | 084  | 0.722226 | 0.445653 | 0.954423 |
| 0 | 085  | 0.821290 | 0.557191 | 0.500039 |
| 0 | 086  | 0.716417 | 0.056523 | 0.991565 |
| 0 | 087  | 0.333873 | 0.001667 | 0.614994 |
| 0 | 088  | 0.205138 | 0.488965 | 0.121971 |
| 0 | 089  | 0.305701 | 0.502732 | 0.605984 |
| 0 | 090  | 0.232906 | 0.993002 | 0.095378 |
| 0 | 091  | 0.699936 | 0.988726 | 0.376803 |
| 0 | 092  | 0.833992 | 0.486268 | 0.875649 |
| 0 | 093  | 0.734474 | 0.488700 | 0.397709 |
| 0 | 094  | 0.804191 | 0.986196 | 0.893326 |
| 0 | 095  | 0.128617 | 0.127464 | 0.583084 |
| 0 | 096  | 0.404732 | 0.621312 | 0.107002 |
| 0 | 097  | 0.124129 | 0.361790 | 0.589527 |
| 0 | 098  | 0.417858 | 0.855679 | 0.072901 |
| 0 | 099  | 0.905522 | 0.859489 | 0.399814 |
| 0 | 0100 | 0.629806 | 0.358609 | 0.905193 |
| 0 | 0101 | 0.916697 | 0.629379 | 0.421449 |
| 0 | 0102 | 0.618109 | 0.125512 | 0.912009 |
| 0 | 0103 | 0.121702 | 0.063199 | 0.411781 |
| 0 | 0104 | 0.419664 | 0.562515 | 0.932310 |
| 0 | 0105 | 0.094121 | 0.442274 | 0.442045 |
| 0 | 0106 | 0.441540 | 0.942395 | 0.931434 |
| 0 | 0107 | 0.911726 | 0.922185 | 0.572240 |
| 0 | 0108 | 0.623237 | 0.419664 | 0.079070 |
| 0 | 0109 | 0.944163 | 0.541738 | 0.560678 |
| 0 | 0110 | 0.594760 | 0.042357 | 0.058264 |
| 0 | 0111 | 0.142073 | 0.037142 | 0.219862 |
| 0 | 0112 | 0.394097 | 0.540397 | 0.739734 |
| 0 | 0113 | 0.141732 | 0.421398 | 0.260264 |
| 0 | 0114 | 0.396884 | 0.926905 | 0.746214 |
| 0 | 0115 | 0.896337 | 0.949685 | 0.764501 |
| 0 | 0116 | 0.644812 | 0.446599 | 0.270411 |

|   |      |          |          |          |
|---|------|----------|----------|----------|
| 0 | 0117 | 0.895650 | 0.559898 | 0.742438 |
| 0 | 0118 | 0.637118 | 0.061359 | 0.243726 |
| 0 | 0119 | 0.101632 | 0.941890 | 0.341802 |
| 0 | 0120 | 0.438196 | 0.442619 | 0.855935 |
| 0 | 0121 | 0.111065 | 0.543430 | 0.317315 |
| 0 | 0122 | 0.431431 | 0.046023 | 0.810810 |
| 0 | 0123 | 0.941029 | 0.041745 | 0.641296 |
| 0 | 0124 | 0.600666 | 0.540232 | 0.148700 |
| 0 | 0125 | 0.932913 | 0.440302 | 0.684447 |
| 0 | 0126 | 0.611605 | 0.940102 | 0.180215 |
| 0 | 0127 | 0.226717 | 0.120158 | 0.140891 |
| 0 | 0128 | 0.311093 | 0.626933 | 0.663439 |
| 0 | 0129 | 0.218544 | 0.356861 | 0.137554 |
| 0 | 0130 | 0.330351 | 0.868637 | 0.606115 |
| 0 | 0131 | 0.818545 | 0.860222 | 0.845567 |
| 0 | 0132 | 0.729149 | 0.362214 | 0.349671 |
| 0 | 0133 | 0.828456 | 0.619325 | 0.882119 |
| 0 | 0134 | 0.713144 | 0.121496 | 0.372606 |
| 0 | 0135 | 0.517239 | 0.850036 | 0.203894 |
| 0 | 0136 | 0.024382 | 0.348591 | 0.717056 |
| 0 | 0137 | 0.515772 | 0.631730 | 0.211646 |
| 0 | 0138 | 0.025615 | 0.133212 | 0.705520 |
| 0 | 0139 | 0.523673 | 0.136807 | 0.775410 |
| 0 | 0140 | 0.014944 | 0.631651 | 0.290711 |
| 0 | 0141 | 0.524087 | 0.352990 | 0.788556 |
| 0 | 0142 | 0.012176 | 0.853757 | 0.285624 |
| 0 | 0143 | 0.399320 | 0.823502 | 0.264946 |
| 0 | 0144 | 0.145877 | 0.326725 | 0.776957 |
| 0 | 0145 | 0.403219 | 0.673445 | 0.291450 |
| 0 | 0146 | 0.143895 | 0.156034 | 0.776315 |
| 0 | 0147 | 0.647433 | 0.152184 | 0.724311 |
| 0 | 0148 | 0.894308 | 0.650625 | 0.230332 |
| 0 | 0149 | 0.641072 | 0.331188 | 0.711826 |
| 0 | 0150 | 0.895943 | 0.823545 | 0.209821 |
| 0 | 0151 | 0.457376 | 0.739613 | 0.141471 |
| 0 | 0152 | 0.089942 | 0.242768 | 0.651701 |
| 0 | 0153 | 0.590192 | 0.243111 | 0.837552 |
| 0 | 0154 | 0.951211 | 0.743100 | 0.341681 |
| 0 | 0155 | 0.334336 | 0.811289 | 0.428853 |
| 0 | 0156 | 0.209232 | 0.332880 | 0.945085 |
| 0 | 0157 | 0.341433 | 0.646611 | 0.472579 |
| 0 | 0158 | 0.204790 | 0.136810 | 0.948214 |
| 0 | 0159 | 0.715559 | 0.157371 | 0.561704 |
| 0 | 0160 | 0.826775 | 0.662556 | 0.068402 |

|   |      |          |          |          |
|---|------|----------|----------|----------|
| 0 | 0161 | 0.705277 | 0.345931 | 0.542593 |
| 0 | 0162 | 0.833660 | 0.847227 | 0.040295 |
| 0 | 0163 | 0.259795 | 0.856449 | 0.254149 |
| 0 | 0164 | 0.273659 | 0.356619 | 0.778187 |
| 0 | 0165 | 0.261881 | 0.664151 | 0.298456 |
| 0 | 0166 | 0.275202 | 0.161626 | 0.790591 |
| 0 | 0167 | 0.775607 | 0.124688 | 0.729264 |
| 0 | 0168 | 0.766275 | 0.623574 | 0.233123 |
| 0 | 0169 | 0.772379 | 0.321174 | 0.705039 |
| 0 | 0170 | 0.764459 | 0.825180 | 0.200395 |
| 0 | 0171 | 0.294310 | 0.743463 | 0.586840 |
| 0 | 0172 | 0.244071 | 0.237373 | 0.066425 |
| 0 | 0173 | 0.743273 | 0.244693 | 0.424117 |
| 0 | 0174 | 0.797891 | 0.744095 | 0.923684 |
| 0 | 0175 | 0.218437 | 0.839482 | 0.511986 |
| 0 | 0176 | 0.326645 | 0.337425 | 0.030224 |
| 0 | 0177 | 0.215200 | 0.642019 | 0.529713 |
| 0 | 0178 | 0.326736 | 0.139431 | 0.017251 |
| 0 | 0179 | 0.827070 | 0.145737 | 0.461442 |
| 0 | 0180 | 0.715239 | 0.645860 | 0.971363 |
| 0 | 0181 | 0.827166 | 0.341228 | 0.476890 |
| 0 | 0182 | 0.714325 | 0.843310 | 0.961000 |
| 0 | 0183 | 0.134256 | 0.742821 | 0.564259 |
| 0 | 0184 | 0.409215 | 0.236780 | 0.069293 |
| 0 | 0185 | 0.911511 | 0.245619 | 0.426233 |
| 0 | 0186 | 0.630754 | 0.743328 | 0.925385 |
| 0 | 0187 | 0.107136 | 0.820565 | 0.412474 |
| 0 | 0188 | 0.435442 | 0.320099 | 0.924441 |
| 0 | 0189 | 0.101985 | 0.650105 | 0.432170 |
| 0 | 0190 | 0.438813 | 0.155583 | 0.920727 |
| 0 | 0191 | 0.932710 | 0.164090 | 0.574270 |
| 0 | 0192 | 0.604966 | 0.661204 | 0.073763 |
| 0 | 0193 | 0.941981 | 0.333413 | 0.567766 |
| 0 | 0194 | 0.604062 | 0.833747 | 0.062571 |
| 0 | 0195 | 0.132624 | 0.840118 | 0.220286 |
| 0 | 0196 | 0.399953 | 0.343724 | 0.737529 |
| 0 | 0197 | 0.136417 | 0.662341 | 0.242156 |
| 0 | 0198 | 0.399719 | 0.162014 | 0.732139 |
| 0 | 0199 | 0.902593 | 0.139605 | 0.762686 |
| 0 | 0200 | 0.639153 | 0.642083 | 0.262890 |
| 0 | 0201 | 0.899219 | 0.322527 | 0.753483 |
| 0 | 0202 | 0.638964 | 0.820295 | 0.251742 |
| 0 | 0203 | 0.217333 | 0.747195 | 0.158612 |
| 0 | 0204 | 0.316321 | 0.253377 | 0.667931 |

|    |       |          |          |          |
|----|-------|----------|----------|----------|
| O  | O205  | 0.819210 | 0.232308 | 0.828045 |
| O  | O206  | 0.723463 | 0.733855 | 0.326264 |
| Al | Al207 | 0.330607 | 0.865077 | 0.321106 |
| Al | Al208 | 0.333880 | 0.628333 | 0.340589 |
| Si | Si209 | 0.712024 | 0.654939 | 0.308143 |
| Si | Si210 | 0.438811 | 0.045528 | 0.173965 |
| Si | Si211 | 0.097381 | 0.552634 | 0.683700 |
| Si | Si212 | 0.449193 | 0.430575 | 0.171358 |
| Si | Si213 | 0.090024 | 0.936798 | 0.655249 |
| Si | Si214 | 0.596973 | 0.935562 | 0.813558 |
| Si | Si215 | 0.941104 | 0.438815 | 0.317766 |
| Si | Si216 | 0.589971 | 0.546955 | 0.834569 |
| Si | Si217 | 0.948853 | 0.049660 | 0.329580 |
| Si | Si218 | 0.335523 | 0.023708 | 0.335370 |
| Si | Si219 | 0.199287 | 0.523017 | 0.843968 |
| Si | Si220 | 0.338422 | 0.466041 | 0.320913 |
| Si | Si221 | 0.204628 | 0.966384 | 0.805234 |
| Si | Si222 | 0.703100 | 0.960282 | 0.655703 |
| Si | Si223 | 0.837241 | 0.462193 | 0.156591 |
| Si | Si224 | 0.704740 | 0.518089 | 0.684403 |
| Si | Si225 | 0.832975 | 0.017784 | 0.182010 |
| Si | Si226 | 0.297813 | 0.058804 | 0.548492 |
| Si | Si227 | 0.237576 | 0.550434 | 0.061098 |
| Si | Si228 | 0.294643 | 0.438202 | 0.535004 |
| Si | Si229 | 0.241588 | 0.930097 | 0.021410 |
| Si | Si230 | 0.737226 | 0.930340 | 0.438158 |
| Si | Si231 | 0.799833 | 0.428127 | 0.941629 |
| Si | Si232 | 0.744084 | 0.552154 | 0.470136 |
| Si | Si233 | 0.794214 | 0.049842 | 0.965575 |
| Si | Si234 | 0.143174 | 0.057200 | 0.527320 |
| Si | Si235 | 0.392738 | 0.552519 | 0.045397 |
| Si | Si236 | 0.140967 | 0.432870 | 0.538187 |
| Si | Si237 | 0.395682 | 0.927391 | 0.027251 |
| Si | Si238 | 0.891900 | 0.929691 | 0.456153 |
| Si | Si239 | 0.644769 | 0.427588 | 0.963769 |
| Si | Si240 | 0.897823 | 0.556714 | 0.465811 |
| Si | Si241 | 0.639436 | 0.054871 | 0.960802 |
| Si | Si242 | 0.096985 | 0.020861 | 0.315418 |
| Si | Si243 | 0.441136 | 0.521964 | 0.832696 |
| Si | Si244 | 0.091174 | 0.465227 | 0.326206 |
| Si | Si245 | 0.447712 | 0.967065 | 0.816956 |
| Si | Si246 | 0.941205 | 0.962599 | 0.667178 |
| Si | Si247 | 0.597938 | 0.461095 | 0.175940 |
| Si | Si248 | 0.948822 | 0.519417 | 0.676359 |



|    |       |          |          |          |
|----|-------|----------|----------|----------|
| Si | Si249 | 0.588908 | 0.017985 | 0.172870 |
| Si | Si250 | 0.217570 | 0.045260 | 0.183972 |
| Si | Si251 | 0.319610 | 0.550161 | 0.700531 |
| Si | Si252 | 0.210012 | 0.426282 | 0.198023 |
| Si | Si253 | 0.330895 | 0.933134 | 0.678789 |
| Si | Si254 | 0.822620 | 0.935932 | 0.803705 |
| Si | Si255 | 0.719636 | 0.437275 | 0.307903 |
| Si | Si256 | 0.830431 | 0.554451 | 0.810743 |
| Si | Si257 | 0.704848 | 0.054625 | 0.306613 |
| Si | Si258 | 0.447599 | 0.817957 | 0.168777 |
| Si | Si259 | 0.096014 | 0.320202 | 0.683862 |
| Si | Si260 | 0.444785 | 0.665570 | 0.187450 |
| Si | Si261 | 0.097187 | 0.164594 | 0.679297 |
| Si | Si262 | 0.594707 | 0.164436 | 0.812193 |
| Si | Si263 | 0.944798 | 0.663984 | 0.320796 |
| Si | Si264 | 0.596117 | 0.321435 | 0.810589 |
| Si | Si265 | 0.941606 | 0.820145 | 0.309083 |
| Si | Si266 | 0.203909 | 0.365097 | 0.835854 |
| Si | Si267 | 0.208674 | 0.125048 | 0.829150 |
| Si | Si268 | 0.708083 | 0.118404 | 0.665771 |
| Si | Si269 | 0.833950 | 0.619243 | 0.168993 |
| Si | Si270 | 0.708036 | 0.359115 | 0.661478 |
| Si | Si271 | 0.832262 | 0.858508 | 0.159572 |
| Si | Si272 | 0.293723 | 0.816206 | 0.533642 |
| Si | Si273 | 0.249804 | 0.316347 | 0.045360 |
| Si | Si274 | 0.288741 | 0.664369 | 0.562279 |
| Si | Si275 | 0.250498 | 0.158812 | 0.042268 |
| Si | Si276 | 0.749984 | 0.167016 | 0.454460 |
| Si | Si277 | 0.792119 | 0.667646 | 0.960627 |
| Si | Si278 | 0.751177 | 0.323112 | 0.449305 |
| Si | Si279 | 0.791328 | 0.823301 | 0.944061 |
| Si | Si280 | 0.140969 | 0.818111 | 0.521267 |
| Si | Si281 | 0.403299 | 0.314060 | 0.034548 |
| Si | Si282 | 0.137716 | 0.664240 | 0.536696 |
| Si | Si283 | 0.403606 | 0.160816 | 0.028393 |
| Si | Si284 | 0.903959 | 0.168678 | 0.462039 |
| Si | Si285 | 0.638234 | 0.667097 | 0.964437 |
| Si | Si286 | 0.904594 | 0.322472 | 0.462904 |
| Si | Si287 | 0.637461 | 0.821432 | 0.955464 |
| Si | Si288 | 0.089149 | 0.864053 | 0.313924 |
| Si | Si289 | 0.449227 | 0.364830 | 0.826420 |
| Si | Si290 | 0.091656 | 0.622014 | 0.320313 |
| Si | Si291 | 0.448157 | 0.125192 | 0.810206 |
| Si | Si292 | 0.950514 | 0.119504 | 0.671264 |

|    |       |          |          |          |
|----|-------|----------|----------|----------|
| Si | Si293 | 0.590472 | 0.618498 | 0.174058 |
| Si | Si294 | 0.949577 | 0.361239 | 0.680254 |
| Si | Si295 | 0.593444 | 0.861480 | 0.174020 |
| Si | Si296 | 0.206932 | 0.826307 | 0.178367 |
| Si | Si297 | 0.326260 | 0.331087 | 0.695524 |
| Si | Si298 | 0.212482 | 0.673099 | 0.206346 |
| Si | Si299 | 0.324405 | 0.175895 | 0.697927 |
| Si | Si300 | 0.829837 | 0.153751 | 0.806862 |
| Si | Si301 | 0.825332 | 0.309198 | 0.793726 |
| Si | Si302 | 0.713901 | 0.810315 | 0.290944 |
| Zn | Zn303 | 0.420814 | 0.760561 | 0.381783 |

**C<sub>4</sub>H<sub>8</sub>-Phys.Ads-H<sub>2</sub>-Phys.Ads-Zn<sup>2+</sup> (Fig. 3/M3)** Total energy = -1927.88596482 eV

data\_

\_audit\_creation\_method 'Materials Studio'

\_cell\_length\_a 20.357621

\_cell\_length\_b 20.050598

\_cell\_length\_c 13.476578

\_cell\_angle\_alpha 90.000000

\_cell\_angle\_beta 90.000000

\_cell\_angle\_gamma 90.000000

\_symmetry\_space\_group\_name\_H-M 'P1'

loop\_

\_atom\_site\_type\_symbol

\_atom\_site\_label

\_atom\_site\_fract\_x

\_atom\_site\_fract\_y

\_atom\_site\_fract\_z

|   |     |          |          |          |
|---|-----|----------|----------|----------|
| H | H1  | 0.506669 | 0.818996 | 0.418881 |
| H | H2  | 0.477311 | 0.561364 | 0.501895 |
| H | H3  | 0.523760 | 0.733016 | 0.374861 |
| H | H4  | 0.509743 | 0.688966 | 0.540639 |
| H | H5  | 0.485558 | 0.561259 | 0.555344 |
| H | H6  | 0.474202 | 0.831913 | 0.603438 |
| H | H7  | 0.550616 | 0.798685 | 0.636254 |
| H | H8  | 0.418441 | 0.737192 | 0.699896 |
| H | H9  | 0.473340 | 0.782873 | 0.775666 |
| H | H10 | 0.497108 | 0.704246 | 0.728286 |
| C | C11 | 0.506290 | 0.765663 | 0.433805 |
| C | C12 | 0.503823 | 0.742489 | 0.528850 |
| C | C13 | 0.499230 | 0.784783 | 0.619854 |
| C | C14 | 0.470067 | 0.750050 | 0.711097 |
| O | O15 | 0.514221 | 0.029809 | 0.207341 |

|   |     |          |          |          |
|---|-----|----------|----------|----------|
| 0 | 016 | 0.021140 | 0.540809 | 0.711970 |
| 0 | 017 | 0.522948 | 0.439956 | 0.206088 |
| 0 | 018 | 0.016250 | 0.940542 | 0.698200 |
| 0 | 019 | 0.524949 | 0.952428 | 0.784630 |
| 0 | 020 | 0.014242 | 0.456460 | 0.283795 |
| 0 | 021 | 0.514051 | 0.547749 | 0.798545 |
| 0 | 022 | 0.023113 | 0.042020 | 0.286457 |
| 0 | 023 | 0.395014 | 0.060710 | 0.269339 |
| 0 | 024 | 0.141344 | 0.560119 | 0.774530 |
| 0 | 025 | 0.397741 | 0.430568 | 0.257112 |
| 0 | 026 | 0.140120 | 0.942208 | 0.751803 |
| 0 | 027 | 0.643205 | 0.927814 | 0.716848 |
| 0 | 028 | 0.895534 | 0.428054 | 0.217971 |
| 0 | 029 | 0.635052 | 0.537104 | 0.736858 |
| 0 | 030 | 0.897704 | 0.047175 | 0.240140 |
| 0 | 031 | 0.442422 | 0.116368 | 0.105897 |
| 0 | 032 | 0.101155 | 0.622260 | 0.612918 |
| 0 | 033 | 0.443719 | 0.364586 | 0.101067 |
| 0 | 034 | 0.100731 | 0.866187 | 0.600748 |
| 0 | 035 | 0.601207 | 0.866283 | 0.877286 |
| 0 | 036 | 0.939358 | 0.371695 | 0.382496 |
| 0 | 037 | 0.604129 | 0.620422 | 0.883794 |
| 0 | 038 | 0.945575 | 0.122070 | 0.386823 |
| 0 | 039 | 0.408986 | 0.988514 | 0.106526 |
| 0 | 040 | 0.122097 | 0.491857 | 0.609431 |
| 0 | 041 | 0.434738 | 0.496214 | 0.092003 |
| 0 | 042 | 0.102821 | 0.997312 | 0.579941 |
| 0 | 043 | 0.630836 | 0.996213 | 0.883230 |
| 0 | 044 | 0.906962 | 0.500950 | 0.378199 |
| 0 | 045 | 0.601397 | 0.489276 | 0.915015 |
| 0 | 046 | 0.936269 | 0.990662 | 0.409937 |
| 0 | 047 | 0.335666 | 0.060643 | 0.441643 |
| 0 | 048 | 0.205957 | 0.547527 | 0.939992 |
| 0 | 049 | 0.337590 | 0.432065 | 0.430592 |
| 0 | 050 | 0.201640 | 0.947670 | 0.922978 |
| 0 | 051 | 0.704942 | 0.926200 | 0.548369 |
| 0 | 052 | 0.833142 | 0.427925 | 0.049236 |
| 0 | 053 | 0.699518 | 0.543327 | 0.569708 |
| 0 | 054 | 0.838007 | 0.038862 | 0.067286 |
| 0 | 055 | 0.349193 | 0.946292 | 0.343564 |
| 0 | 056 | 0.193603 | 0.443135 | 0.818177 |
| 0 | 057 | 0.344237 | 0.542891 | 0.323415 |
| 0 | 058 | 0.213177 | 0.048026 | 0.795275 |
| 0 | 059 | 0.694364 | 0.040588 | 0.647399 |

|   |      |          |          |          |
|---|------|----------|----------|----------|
| 0 | 060  | 0.848282 | 0.542310 | 0.146325 |
| 0 | 061  | 0.716431 | 0.438580 | 0.687777 |
| 0 | 062  | 0.832215 | 0.937184 | 0.192370 |
| 0 | 063  | 0.266151 | 0.039892 | 0.279698 |
| 0 | 064  | 0.270800 | 0.544091 | 0.771375 |
| 0 | 065  | 0.268055 | 0.441766 | 0.267791 |
| 0 | 066  | 0.269714 | 0.932880 | 0.756671 |
| 0 | 067  | 0.773387 | 0.945144 | 0.712182 |
| 0 | 068  | 0.766131 | 0.451140 | 0.213965 |
| 0 | 069  | 0.763505 | 0.556213 | 0.740949 |
| 0 | 070  | 0.767874 | 0.048994 | 0.231220 |
| 0 | 071  | 0.305386 | 0.131058 | 0.599446 |
| 0 | 072  | 0.221243 | 0.621526 | 0.097036 |
| 0 | 073  | 0.308174 | 0.369595 | 0.595235 |
| 0 | 074  | 0.214492 | 0.865253 | 0.071868 |
| 0 | 075  | 0.730776 | 0.859503 | 0.386275 |
| 0 | 076  | 0.808718 | 0.358029 | 0.888292 |
| 0 | 077  | 0.717805 | 0.619938 | 0.415502 |
| 0 | 078  | 0.824261 | 0.117545 | 0.914559 |
| 0 | 079  | 0.222517 | 0.037848 | 0.534865 |
| 0 | 080  | 0.315041 | 0.535598 | 0.046555 |
| 0 | 081  | 0.215432 | 0.436474 | 0.500245 |
| 0 | 082  | 0.320264 | 0.926296 | 0.995056 |
| 0 | 083  | 0.816321 | 0.950212 | 0.451336 |
| 0 | 084  | 0.721045 | 0.446910 | 0.953568 |
| 0 | 085  | 0.819572 | 0.556029 | 0.499310 |
| 0 | 086  | 0.718843 | 0.058600 | 0.994387 |
| 0 | 087  | 0.334761 | 0.003813 | 0.620179 |
| 0 | 088  | 0.202329 | 0.489253 | 0.113592 |
| 0 | 089  | 0.309955 | 0.501671 | 0.592889 |
| 0 | 090  | 0.235326 | 0.995453 | 0.099399 |
| 0 | 091  | 0.702606 | 0.989253 | 0.376843 |
| 0 | 092  | 0.832625 | 0.487782 | 0.874307 |
| 0 | 093  | 0.731575 | 0.489293 | 0.396068 |
| 0 | 094  | 0.804166 | 0.987663 | 0.892871 |
| 0 | 095  | 0.130850 | 0.126361 | 0.584486 |
| 0 | 096  | 0.405578 | 0.624780 | 0.098365 |
| 0 | 097  | 0.124410 | 0.360919 | 0.586974 |
| 0 | 098  | 0.413555 | 0.857484 | 0.085554 |
| 0 | 099  | 0.906767 | 0.860857 | 0.402402 |
| 0 | 0100 | 0.629326 | 0.359231 | 0.904846 |
| 0 | 0101 | 0.914985 | 0.629705 | 0.423582 |
| 0 | 0102 | 0.621099 | 0.126898 | 0.912815 |
| 0 | 0103 | 0.121833 | 0.063193 | 0.413087 |

|   |      |          |          |          |
|---|------|----------|----------|----------|
| 0 | 0104 | 0.414582 | 0.563343 | 0.925174 |
| 0 | 0105 | 0.092465 | 0.438017 | 0.436234 |
| 0 | 0106 | 0.443781 | 0.934011 | 0.934306 |
| 0 | 0107 | 0.915112 | 0.922642 | 0.574784 |
| 0 | 0108 | 0.622008 | 0.419848 | 0.078234 |
| 0 | 0109 | 0.942400 | 0.538761 | 0.558511 |
| 0 | 0110 | 0.596682 | 0.044322 | 0.059088 |
| 0 | 0111 | 0.142837 | 0.040573 | 0.220480 |
| 0 | 0112 | 0.396377 | 0.535229 | 0.731933 |
| 0 | 0113 | 0.138909 | 0.423090 | 0.253091 |
| 0 | 0114 | 0.400367 | 0.928736 | 0.747730 |
| 0 | 0115 | 0.897369 | 0.948889 | 0.767248 |
| 0 | 0116 | 0.642795 | 0.442810 | 0.270652 |
| 0 | 0117 | 0.894159 | 0.560494 | 0.739725 |
| 0 | 0118 | 0.638338 | 0.062013 | 0.245394 |
| 0 | 0119 | 0.103283 | 0.942807 | 0.339297 |
| 0 | 0120 | 0.441877 | 0.443562 | 0.856505 |
| 0 | 0121 | 0.110050 | 0.543502 | 0.319632 |
| 0 | 0122 | 0.434649 | 0.044223 | 0.827465 |
| 0 | 0123 | 0.939483 | 0.042688 | 0.644470 |
| 0 | 0124 | 0.602661 | 0.539767 | 0.151392 |
| 0 | 0125 | 0.935200 | 0.440745 | 0.688612 |
| 0 | 0126 | 0.610930 | 0.941535 | 0.180133 |
| 0 | 0127 | 0.226524 | 0.123823 | 0.139217 |
| 0 | 0128 | 0.326537 | 0.626818 | 0.642061 |
| 0 | 0129 | 0.219039 | 0.357328 | 0.137598 |
| 0 | 0130 | 0.331152 | 0.871465 | 0.610789 |
| 0 | 0131 | 0.817705 | 0.861056 | 0.848593 |
| 0 | 0132 | 0.730506 | 0.362265 | 0.349868 |
| 0 | 0133 | 0.828659 | 0.620754 | 0.880449 |
| 0 | 0134 | 0.714718 | 0.122034 | 0.373801 |
| 0 | 0135 | 0.516823 | 0.851851 | 0.208746 |
| 0 | 0136 | 0.026158 | 0.348182 | 0.717805 |
| 0 | 0137 | 0.515309 | 0.630445 | 0.208872 |
| 0 | 0138 | 0.026756 | 0.132304 | 0.705395 |
| 0 | 0139 | 0.525109 | 0.134804 | 0.778506 |
| 0 | 0140 | 0.014475 | 0.632146 | 0.295611 |
| 0 | 0141 | 0.525109 | 0.352882 | 0.785829 |
| 0 | 0142 | 0.013060 | 0.853875 | 0.287738 |
| 0 | 0143 | 0.399981 | 0.818256 | 0.274089 |
| 0 | 0144 | 0.148500 | 0.324061 | 0.773235 |
| 0 | 0145 | 0.401843 | 0.670717 | 0.284491 |
| 0 | 0146 | 0.144342 | 0.158324 | 0.776244 |
| 0 | 0147 | 0.648059 | 0.152870 | 0.724156 |

|   |      |          |          |          |
|---|------|----------|----------|----------|
| 0 | 0148 | 0.894113 | 0.652423 | 0.232655 |
| 0 | 0149 | 0.643031 | 0.330765 | 0.712400 |
| 0 | 0150 | 0.896358 | 0.823980 | 0.213204 |
| 0 | 0151 | 0.460084 | 0.741071 | 0.142551 |
| 0 | 0152 | 0.089373 | 0.242116 | 0.648446 |
| 0 | 0153 | 0.590130 | 0.243272 | 0.837224 |
| 0 | 0154 | 0.951329 | 0.743797 | 0.345678 |
| 0 | 0155 | 0.332257 | 0.815237 | 0.434441 |
| 0 | 0156 | 0.206390 | 0.342755 | 0.945303 |
| 0 | 0157 | 0.338889 | 0.665321 | 0.452157 |
| 0 | 0158 | 0.206636 | 0.135921 | 0.945475 |
| 0 | 0159 | 0.717792 | 0.157237 | 0.563182 |
| 0 | 0160 | 0.828936 | 0.661484 | 0.068188 |
| 0 | 0161 | 0.706437 | 0.346881 | 0.542950 |
| 0 | 0162 | 0.835440 | 0.847746 | 0.042972 |
| 0 | 0163 | 0.260789 | 0.850655 | 0.254978 |
| 0 | 0164 | 0.278130 | 0.345061 | 0.783596 |
| 0 | 0165 | 0.259483 | 0.655949 | 0.279065 |
| 0 | 0166 | 0.275722 | 0.163071 | 0.786364 |
| 0 | 0167 | 0.776363 | 0.125420 | 0.732467 |
| 0 | 0168 | 0.765682 | 0.626159 | 0.232457 |
| 0 | 0169 | 0.774405 | 0.322253 | 0.704721 |
| 0 | 0170 | 0.764801 | 0.825113 | 0.201731 |
| 0 | 0171 | 0.293810 | 0.746839 | 0.590833 |
| 0 | 0172 | 0.242607 | 0.240165 | 0.056308 |
| 0 | 0173 | 0.744428 | 0.245161 | 0.425801 |
| 0 | 0174 | 0.798787 | 0.744869 | 0.926306 |
| 0 | 0175 | 0.217387 | 0.844779 | 0.519833 |
| 0 | 0176 | 0.325555 | 0.340566 | 0.025989 |
| 0 | 0177 | 0.219467 | 0.643240 | 0.531034 |
| 0 | 0178 | 0.327509 | 0.141632 | 0.017695 |
| 0 | 0179 | 0.828806 | 0.146664 | 0.461795 |
| 0 | 0180 | 0.716521 | 0.646240 | 0.973321 |
| 0 | 0181 | 0.828298 | 0.342105 | 0.477432 |
| 0 | 0182 | 0.715316 | 0.843417 | 0.968349 |
| 0 | 0183 | 0.137067 | 0.743529 | 0.563487 |
| 0 | 0184 | 0.408274 | 0.240599 | 0.067623 |
| 0 | 0185 | 0.913167 | 0.246913 | 0.427377 |
| 0 | 0186 | 0.632136 | 0.744024 | 0.928144 |
| 0 | 0187 | 0.109140 | 0.822450 | 0.413403 |
| 0 | 0188 | 0.431950 | 0.319560 | 0.915889 |
| 0 | 0189 | 0.110174 | 0.654984 | 0.423964 |
| 0 | 0190 | 0.439182 | 0.159719 | 0.920480 |
| 0 | 0191 | 0.934430 | 0.164672 | 0.574494 |

|    |       |          |          |          |
|----|-------|----------|----------|----------|
| O  | O192  | 0.605404 | 0.660154 | 0.073496 |
| O  | O193  | 0.942487 | 0.334487 | 0.569884 |
| O  | O194  | 0.603321 | 0.833194 | 0.066449 |
| O  | O195  | 0.133023 | 0.839805 | 0.220297 |
| O  | O196  | 0.402246 | 0.350609 | 0.728550 |
| O  | O197  | 0.132963 | 0.659188 | 0.230032 |
| O  | O198  | 0.400877 | 0.153429 | 0.731250 |
| O  | O199  | 0.903698 | 0.142737 | 0.763154 |
| O  | O200  | 0.638241 | 0.643529 | 0.263417 |
| O  | O201  | 0.900723 | 0.323014 | 0.756223 |
| O  | O202  | 0.639197 | 0.823361 | 0.255650 |
| O  | O203  | 0.214143 | 0.746721 | 0.150862 |
| O  | O204  | 0.327070 | 0.251344 | 0.664230 |
| O  | O205  | 0.819298 | 0.233605 | 0.830216 |
| O  | O206  | 0.722169 | 0.734997 | 0.328369 |
| Al | Al207 | 0.331231 | 0.863963 | 0.321577 |
| Al | Al208 | 0.330771 | 0.626781 | 0.331805 |
| Si | Si209 | 0.711312 | 0.656186 | 0.308530 |
| Si | Si210 | 0.440086 | 0.048871 | 0.172326 |
| Si | Si211 | 0.096116 | 0.553691 | 0.676230 |
| Si | Si212 | 0.448359 | 0.432977 | 0.164948 |
| Si | Si213 | 0.091006 | 0.936667 | 0.657714 |
| Si | Si214 | 0.599894 | 0.936296 | 0.816964 |
| Si | Si215 | 0.939718 | 0.439259 | 0.316734 |
| Si | Si216 | 0.589809 | 0.548233 | 0.834231 |
| Si | Si217 | 0.949899 | 0.050444 | 0.330847 |
| Si | Si218 | 0.336590 | 0.024815 | 0.333099 |
| Si | Si219 | 0.203115 | 0.523247 | 0.826612 |
| Si | Si220 | 0.336995 | 0.463569 | 0.318939 |
| Si | Si221 | 0.205964 | 0.967764 | 0.807258 |
| Si | Si222 | 0.704381 | 0.960580 | 0.657038 |
| Si | Si223 | 0.835715 | 0.462584 | 0.157583 |
| Si | Si224 | 0.704019 | 0.518530 | 0.683902 |
| Si | Si225 | 0.834051 | 0.018000 | 0.183057 |
| Si | Si226 | 0.299490 | 0.058291 | 0.548056 |
| Si | Si227 | 0.236078 | 0.549146 | 0.050733 |
| Si | Si228 | 0.292994 | 0.434940 | 0.529564 |
| Si | Si229 | 0.242568 | 0.933164 | 0.023931 |
| Si | Si230 | 0.739093 | 0.931250 | 0.440050 |
| Si | Si231 | 0.798787 | 0.429872 | 0.941023 |
| Si | Si232 | 0.742351 | 0.552059 | 0.469325 |
| Si | Si233 | 0.796292 | 0.050732 | 0.966779 |
| Si | Si234 | 0.144961 | 0.056388 | 0.527740 |
| Si | Si235 | 0.392001 | 0.554781 | 0.040430 |

|    |       |          |          |          |
|----|-------|----------|----------|----------|
| Si | Si236 | 0.138967 | 0.431757 | 0.533324 |
| Si | Si237 | 0.396153 | 0.927325 | 0.030568 |
| Si | Si238 | 0.893778 | 0.930869 | 0.459391 |
| Si | Si239 | 0.643644 | 0.428473 | 0.963124 |
| Si | Si240 | 0.895997 | 0.556178 | 0.464816 |
| Si | Si241 | 0.642126 | 0.056454 | 0.962366 |
| Si | Si242 | 0.097882 | 0.022008 | 0.315294 |
| Si | Si243 | 0.441220 | 0.522369 | 0.828903 |
| Si | Si244 | 0.089232 | 0.465337 | 0.322611 |
| Si | Si245 | 0.450584 | 0.965185 | 0.823478 |
| Si | Si246 | 0.942392 | 0.963639 | 0.670650 |
| Si | Si247 | 0.597090 | 0.460412 | 0.176044 |
| Si | Si248 | 0.948254 | 0.520048 | 0.675434 |
| Si | Si249 | 0.589813 | 0.019832 | 0.173494 |
| Si | Si250 | 0.218345 | 0.049373 | 0.185020 |
| Si | Si251 | 0.325128 | 0.551083 | 0.684734 |
| Si | Si252 | 0.207815 | 0.428321 | 0.192887 |
| Si | Si253 | 0.333048 | 0.935400 | 0.684078 |
| Si | Si254 | 0.823154 | 0.936192 | 0.805082 |
| Si | Si255 | 0.718140 | 0.436674 | 0.307369 |
| Si | Si256 | 0.829427 | 0.555821 | 0.809103 |
| Si | Si257 | 0.706495 | 0.055463 | 0.307188 |
| Si | Si258 | 0.447217 | 0.817791 | 0.176732 |
| Si | Si259 | 0.097032 | 0.319284 | 0.681673 |
| Si | Si260 | 0.445476 | 0.666019 | 0.182485 |
| Si | Si261 | 0.097904 | 0.164487 | 0.678599 |
| Si | Si262 | 0.595868 | 0.164544 | 0.812980 |
| Si | Si263 | 0.944282 | 0.664783 | 0.323986 |
| Si | Si264 | 0.596842 | 0.321490 | 0.809888 |
| Si | Si265 | 0.942378 | 0.820762 | 0.312089 |
| Si | Si266 | 0.206717 | 0.363909 | 0.829738 |
| Si | Si267 | 0.209547 | 0.126179 | 0.826103 |
| Si | Si268 | 0.709424 | 0.118867 | 0.667552 |
| Si | Si269 | 0.834339 | 0.620155 | 0.170848 |
| Si | Si270 | 0.709508 | 0.359707 | 0.661901 |
| Si | Si271 | 0.832877 | 0.858812 | 0.162287 |
| Si | Si272 | 0.292364 | 0.820208 | 0.539764 |
| Si | Si273 | 0.248655 | 0.319828 | 0.041472 |
| Si | Si274 | 0.293922 | 0.669695 | 0.552953 |
| Si | Si275 | 0.250840 | 0.160901 | 0.039309 |
| Si | Si276 | 0.751618 | 0.167486 | 0.455669 |
| Si | Si277 | 0.793295 | 0.668022 | 0.961376 |
| Si | Si278 | 0.752404 | 0.323700 | 0.449972 |
| Si | Si279 | 0.792044 | 0.823877 | 0.947777 |



|    |       |          |          |          |
|----|-------|----------|----------|----------|
| Si | Si280 | 0.140670 | 0.819678 | 0.523655 |
| Si | Si281 | 0.402092 | 0.316778 | 0.027919 |
| Si | Si282 | 0.141923 | 0.665569 | 0.532333 |
| Si | Si283 | 0.404072 | 0.164198 | 0.028331 |
| Si | Si284 | 0.905609 | 0.169811 | 0.462421 |
| Si | Si285 | 0.639586 | 0.667352 | 0.965119 |
| Si | Si286 | 0.905853 | 0.323689 | 0.464420 |
| Si | Si287 | 0.638489 | 0.821748 | 0.960237 |
| Si | Si288 | 0.090285 | 0.864689 | 0.314088 |
| Si | Si289 | 0.450174 | 0.366436 | 0.821634 |
| Si | Si290 | 0.092339 | 0.622544 | 0.317088 |
| Si | Si291 | 0.449783 | 0.123231 | 0.814468 |
| Si | Si292 | 0.951119 | 0.120490 | 0.672254 |
| Si | Si293 | 0.590795 | 0.618047 | 0.174105 |
| Si | Si294 | 0.951072 | 0.361618 | 0.682627 |
| Si | Si295 | 0.592860 | 0.862867 | 0.176948 |
| Si | Si296 | 0.206891 | 0.825410 | 0.176966 |
| Si | Si297 | 0.328867 | 0.329226 | 0.693500 |
| Si | Si298 | 0.208342 | 0.670742 | 0.191299 |
| Si | Si299 | 0.327419 | 0.173855 | 0.695539 |
| Si | Si300 | 0.831037 | 0.155206 | 0.808831 |
| Si | Si301 | 0.826293 | 0.310312 | 0.794954 |
| Si | Si302 | 0.714349 | 0.811604 | 0.292970 |
| Zn | Zn303 | 0.401224 | 0.744674 | 0.393752 |

**TS-C<sub>4</sub>H<sub>9</sub>-HTransfer-Stepwise-Zn<sup>2+</sup> (Fig. 3/TS3)** Total energy = -1925.69057410 eV

data\_

\_audit\_creation\_method 'Materials Studio'

\_cell\_length\_a 20.357621

\_cell\_length\_b 20.050598

\_cell\_length\_c 13.476578

\_cell\_angle\_alpha 90.000000

\_cell\_angle\_beta 90.000000

\_cell\_angle\_gamma 90.000000

\_symmetry\_space\_group\_name\_H-M 'P1'

loop\_

\_atom\_site\_type\_symbol

\_atom\_site\_label

\_atom\_site\_fract\_x

\_atom\_site\_fract\_y

\_atom\_site\_fract\_z

|   |    |          |          |          |
|---|----|----------|----------|----------|
| H | H1 | 0.527045 | 0.825087 | 0.563935 |
|---|----|----------|----------|----------|

|   |    |          |          |          |
|---|----|----------|----------|----------|
| H | H2 | 0.380517 | 0.672915 | 0.449219 |
|---|----|----------|----------|----------|

|   |     |          |          |          |
|---|-----|----------|----------|----------|
| H | H3  | 0.555449 | 0.832832 | 0.435100 |
| H | H4  | 0.538479 | 0.715185 | 0.404612 |
| H | H5  | 0.444280 | 0.709441 | 0.450637 |
| H | H6  | 0.507818 | 0.703841 | 0.627881 |
| H | H7  | 0.585925 | 0.692324 | 0.575753 |
| H | H8  | 0.465791 | 0.603216 | 0.535803 |
| H | H9  | 0.538812 | 0.581772 | 0.597927 |
| H | H10 | 0.540548 | 0.597514 | 0.468709 |
| C | C11 | 0.525116 | 0.806183 | 0.488335 |
| C | C12 | 0.522327 | 0.734406 | 0.476411 |
| C | C13 | 0.532869 | 0.686428 | 0.560685 |
| C | C14 | 0.518561 | 0.613023 | 0.539187 |
| O | O15 | 0.515943 | 0.030137 | 0.211944 |
| O | O16 | 0.028170 | 0.527057 | 0.706137 |
| O | O17 | 0.520927 | 0.443671 | 0.197710 |
| O | O18 | 0.014217 | 0.933657 | 0.701999 |
| O | O19 | 0.521499 | 0.950426 | 0.791046 |
| O | O20 | 0.013388 | 0.451168 | 0.280051 |
| O | O21 | 0.517673 | 0.539639 | 0.787730 |
| O | O22 | 0.023478 | 0.041518 | 0.293226 |
| O | O23 | 0.398268 | 0.058314 | 0.281809 |
| O | O24 | 0.149680 | 0.553790 | 0.760359 |
| O | O25 | 0.395989 | 0.449555 | 0.242815 |
| O | O26 | 0.136137 | 0.938194 | 0.766981 |
| O | O27 | 0.637419 | 0.927121 | 0.712047 |
| O | O28 | 0.891271 | 0.424736 | 0.228193 |
| O | O29 | 0.644645 | 0.548603 | 0.751335 |
| O | O30 | 0.901003 | 0.036061 | 0.234231 |
| O | O31 | 0.440559 | 0.118475 | 0.119205 |
| O | O32 | 0.100459 | 0.609440 | 0.597865 |
| O | O33 | 0.438861 | 0.364964 | 0.104176 |
| O | O34 | 0.104087 | 0.858399 | 0.616325 |
| O | O35 | 0.601225 | 0.861872 | 0.872398 |
| O | O36 | 0.942263 | 0.368285 | 0.388500 |
| O | O37 | 0.590869 | 0.614967 | 0.902374 |
| O | O38 | 0.936532 | 0.118885 | 0.379470 |
| O | O39 | 0.408937 | 0.990287 | 0.114180 |
| O | O40 | 0.130141 | 0.480088 | 0.602166 |
| O | O41 | 0.438519 | 0.494989 | 0.067702 |
| O | O42 | 0.104668 | 0.989470 | 0.589490 |
| O | O43 | 0.631236 | 0.991080 | 0.882630 |
| O | O44 | 0.912555 | 0.497953 | 0.386285 |
| O | O45 | 0.601481 | 0.482820 | 0.910838 |
| O | O46 | 0.934825 | 0.988042 | 0.411740 |

|   |     |          |          |          |
|---|-----|----------|----------|----------|
| 0 | 047 | 0.338856 | 0.053547 | 0.453538 |
| 0 | 048 | 0.213224 | 0.554499 | 0.928581 |
| 0 | 049 | 0.335000 | 0.426065 | 0.409693 |
| 0 | 050 | 0.199308 | 0.954343 | 0.937839 |
| 0 | 051 | 0.701538 | 0.923068 | 0.545214 |
| 0 | 052 | 0.831175 | 0.424898 | 0.057670 |
| 0 | 053 | 0.700337 | 0.541230 | 0.576648 |
| 0 | 054 | 0.838006 | 0.036204 | 0.064476 |
| 0 | 055 | 0.341532 | 0.945021 | 0.338884 |
| 0 | 056 | 0.191784 | 0.438635 | 0.837973 |
| 0 | 057 | 0.310105 | 0.538415 | 0.314067 |
| 0 | 058 | 0.205232 | 0.048079 | 0.799923 |
| 0 | 059 | 0.692850 | 0.037723 | 0.642880 |
| 0 | 060 | 0.846618 | 0.539694 | 0.154606 |
| 0 | 061 | 0.705529 | 0.436913 | 0.697259 |
| 0 | 062 | 0.824388 | 0.933425 | 0.186763 |
| 0 | 063 | 0.267714 | 0.049691 | 0.291563 |
| 0 | 064 | 0.277069 | 0.524047 | 0.763768 |
| 0 | 065 | 0.268539 | 0.422721 | 0.241872 |
| 0 | 066 | 0.266018 | 0.933360 | 0.772741 |
| 0 | 067 | 0.768508 | 0.940972 | 0.711462 |
| 0 | 068 | 0.762494 | 0.449923 | 0.219647 |
| 0 | 069 | 0.774641 | 0.546228 | 0.736979 |
| 0 | 070 | 0.771706 | 0.049614 | 0.233123 |
| 0 | 071 | 0.304924 | 0.121322 | 0.611995 |
| 0 | 072 | 0.222369 | 0.625341 | 0.091318 |
| 0 | 073 | 0.328721 | 0.359972 | 0.574127 |
| 0 | 074 | 0.212561 | 0.871352 | 0.084926 |
| 0 | 075 | 0.730724 | 0.859348 | 0.381283 |
| 0 | 076 | 0.810325 | 0.353085 | 0.897517 |
| 0 | 077 | 0.717259 | 0.619578 | 0.424880 |
| 0 | 078 | 0.820980 | 0.113954 | 0.910658 |
| 0 | 079 | 0.222659 | 0.031159 | 0.539037 |
| 0 | 080 | 0.319696 | 0.543618 | 0.041194 |
| 0 | 081 | 0.219241 | 0.413941 | 0.498967 |
| 0 | 082 | 0.319331 | 0.927920 | 0.003863 |
| 0 | 083 | 0.814674 | 0.948887 | 0.455239 |
| 0 | 084 | 0.722026 | 0.444003 | 0.953338 |
| 0 | 085 | 0.819248 | 0.551083 | 0.498793 |
| 0 | 086 | 0.717950 | 0.053168 | 0.996253 |
| 0 | 087 | 0.332483 | 0.992022 | 0.626223 |
| 0 | 088 | 0.206534 | 0.494506 | 0.103108 |
| 0 | 089 | 0.310320 | 0.491288 | 0.577852 |
| 0 | 090 | 0.239973 | 0.998985 | 0.113892 |

|   |      |          |          |          |
|---|------|----------|----------|----------|
| 0 | 091  | 0.703218 | 0.989297 | 0.375678 |
| 0 | 092  | 0.836750 | 0.482426 | 0.881728 |
| 0 | 093  | 0.725591 | 0.488852 | 0.400075 |
| 0 | 094  | 0.802378 | 0.983609 | 0.891175 |
| 0 | 095  | 0.133007 | 0.118910 | 0.599629 |
| 0 | 096  | 0.420880 | 0.626637 | 0.068035 |
| 0 | 097  | 0.112898 | 0.351310 | 0.565697 |
| 0 | 098  | 0.409683 | 0.858611 | 0.099775 |
| 0 | 099  | 0.901969 | 0.858884 | 0.400047 |
| 0 | 0100 | 0.631239 | 0.353700 | 0.908437 |
| 0 | 0101 | 0.911826 | 0.628084 | 0.421141 |
| 0 | 0102 | 0.621050 | 0.121450 | 0.914009 |
| 0 | 0103 | 0.118949 | 0.060922 | 0.425955 |
| 0 | 0104 | 0.411534 | 0.559491 | 0.901413 |
| 0 | 0105 | 0.100781 | 0.436559 | 0.421838 |
| 0 | 0106 | 0.443434 | 0.932747 | 0.945193 |
| 0 | 0107 | 0.915337 | 0.917645 | 0.574111 |
| 0 | 0108 | 0.623298 | 0.419003 | 0.078650 |
| 0 | 0109 | 0.941394 | 0.544188 | 0.564921 |
| 0 | 0110 | 0.594936 | 0.038181 | 0.058274 |
| 0 | 0111 | 0.144278 | 0.038640 | 0.233823 |
| 0 | 0112 | 0.401251 | 0.528380 | 0.709422 |
| 0 | 0113 | 0.137209 | 0.425871 | 0.233175 |
| 0 | 0114 | 0.396386 | 0.922161 | 0.761694 |
| 0 | 0115 | 0.893533 | 0.942467 | 0.765235 |
| 0 | 0116 | 0.638389 | 0.442149 | 0.272043 |
| 0 | 0117 | 0.904617 | 0.554902 | 0.753937 |
| 0 | 0118 | 0.641445 | 0.060958 | 0.240514 |
| 0 | 0119 | 0.101416 | 0.941611 | 0.350850 |
| 0 | 0120 | 0.440001 | 0.438210 | 0.841021 |
| 0 | 0121 | 0.105679 | 0.543312 | 0.309241 |
| 0 | 0122 | 0.429356 | 0.040568 | 0.831563 |
| 0 | 0123 | 0.939173 | 0.037056 | 0.647036 |
| 0 | 0124 | 0.605563 | 0.540410 | 0.149862 |
| 0 | 0125 | 0.933210 | 0.436921 | 0.679306 |
| 0 | 0126 | 0.610476 | 0.939109 | 0.185097 |
| 0 | 0127 | 0.221448 | 0.126359 | 0.148075 |
| 0 | 0128 | 0.318736 | 0.615465 | 0.635777 |
| 0 | 0129 | 0.204874 | 0.362134 | 0.098743 |
| 0 | 0130 | 0.321715 | 0.859293 | 0.636672 |
| 0 | 0131 | 0.812461 | 0.856288 | 0.846611 |
| 0 | 0132 | 0.724503 | 0.361528 | 0.354520 |
| 0 | 0133 | 0.829621 | 0.615443 | 0.882814 |
| 0 | 0134 | 0.714636 | 0.122154 | 0.371953 |

|   |      |          |          |          |
|---|------|----------|----------|----------|
| 0 | 0135 | 0.517654 | 0.848488 | 0.213119 |
| 0 | 0136 | 0.025635 | 0.345636 | 0.713789 |
| 0 | 0137 | 0.515361 | 0.629749 | 0.205284 |
| 0 | 0138 | 0.024239 | 0.127798 | 0.710116 |
| 0 | 0139 | 0.521352 | 0.130316 | 0.786067 |
| 0 | 0140 | 0.008637 | 0.630604 | 0.288339 |
| 0 | 0141 | 0.527657 | 0.347662 | 0.787448 |
| 0 | 0142 | 0.011616 | 0.853742 | 0.293630 |
| 0 | 0143 | 0.403546 | 0.820121 | 0.288561 |
| 0 | 0144 | 0.151604 | 0.327580 | 0.749681 |
| 0 | 0145 | 0.392689 | 0.650222 | 0.259459 |
| 0 | 0146 | 0.139729 | 0.160347 | 0.787075 |
| 0 | 0147 | 0.642153 | 0.146849 | 0.723575 |
| 0 | 0148 | 0.887377 | 0.654489 | 0.231511 |
| 0 | 0149 | 0.646209 | 0.321412 | 0.717405 |
| 0 | 0150 | 0.898438 | 0.825631 | 0.208820 |
| 0 | 0151 | 0.455585 | 0.740291 | 0.148894 |
| 0 | 0152 | 0.085810 | 0.236392 | 0.648091 |
| 0 | 0153 | 0.589444 | 0.237705 | 0.842657 |
| 0 | 0154 | 0.948420 | 0.742716 | 0.343802 |
| 0 | 0155 | 0.337096 | 0.823524 | 0.449642 |
| 0 | 0156 | 0.215811 | 0.318838 | 0.915064 |
| 0 | 0157 | 0.335566 | 0.651322 | 0.445168 |
| 0 | 0158 | 0.204444 | 0.133868 | 0.953888 |
| 0 | 0159 | 0.710716 | 0.156083 | 0.562240 |
| 0 | 0160 | 0.818043 | 0.655360 | 0.069804 |
| 0 | 0161 | 0.707642 | 0.346991 | 0.548542 |
| 0 | 0162 | 0.834064 | 0.842849 | 0.040075 |
| 0 | 0163 | 0.260747 | 0.837969 | 0.262756 |
| 0 | 0164 | 0.278875 | 0.358496 | 0.754261 |
| 0 | 0165 | 0.250128 | 0.664476 | 0.277152 |
| 0 | 0166 | 0.271776 | 0.160922 | 0.793974 |
| 0 | 0167 | 0.771416 | 0.124599 | 0.730281 |
| 0 | 0168 | 0.760867 | 0.621675 | 0.239015 |
| 0 | 0169 | 0.777588 | 0.327656 | 0.709346 |
| 0 | 0170 | 0.767463 | 0.816278 | 0.202042 |
| 0 | 0171 | 0.295235 | 0.737191 | 0.583437 |
| 0 | 0172 | 0.243242 | 0.239239 | 0.062593 |
| 0 | 0173 | 0.742462 | 0.244672 | 0.429072 |
| 0 | 0174 | 0.797034 | 0.739548 | 0.925171 |
| 0 | 0175 | 0.216028 | 0.835023 | 0.522399 |
| 0 | 0176 | 0.323694 | 0.340170 | 0.021076 |
| 0 | 0177 | 0.215759 | 0.638527 | 0.516312 |
| 0 | 0178 | 0.325366 | 0.138424 | 0.028408 |

|    |       |          |          |          |
|----|-------|----------|----------|----------|
| O  | O179  | 0.825160 | 0.145505 | 0.471333 |
| O  | O180  | 0.712127 | 0.640623 | 0.957305 |
| O  | O181  | 0.827254 | 0.341900 | 0.472754 |
| O  | O182  | 0.712782 | 0.837012 | 0.970683 |
| O  | O183  | 0.132985 | 0.735298 | 0.564506 |
| O  | O184  | 0.404977 | 0.240519 | 0.070094 |
| O  | O185  | 0.909875 | 0.243084 | 0.426904 |
| O  | O186  | 0.626867 | 0.740398 | 0.929232 |
| O  | O187  | 0.103609 | 0.821389 | 0.424513 |
| O  | O188  | 0.433823 | 0.318388 | 0.918996 |
| O  | O189  | 0.105622 | 0.655231 | 0.413253 |
| O  | O190  | 0.437323 | 0.154101 | 0.930680 |
| O  | O191  | 0.937228 | 0.157317 | 0.569768 |
| O  | O192  | 0.614442 | 0.663242 | 0.084621 |
| O  | O193  | 0.937243 | 0.325279 | 0.574077 |
| O  | O194  | 0.599138 | 0.834520 | 0.063462 |
| O  | O195  | 0.132372 | 0.839775 | 0.232261 |
| O  | O196  | 0.405746 | 0.334980 | 0.727944 |
| O  | O197  | 0.126039 | 0.657749 | 0.217228 |
| O  | O198  | 0.397533 | 0.153863 | 0.742616 |
| O  | O199  | 0.899334 | 0.139645 | 0.757345 |
| O  | O200  | 0.634500 | 0.639607 | 0.275933 |
| O  | O201  | 0.902321 | 0.322138 | 0.764105 |
| O  | O202  | 0.640876 | 0.819285 | 0.250085 |
| O  | O203  | 0.204406 | 0.748920 | 0.140936 |
| O  | O204  | 0.319298 | 0.245846 | 0.664931 |
| O  | O205  | 0.817433 | 0.231226 | 0.827617 |
| O  | O206  | 0.720055 | 0.732697 | 0.333772 |
| Al | Al207 | 0.328918 | 0.860988 | 0.327448 |
| Al | Al208 | 0.320339 | 0.623183 | 0.312656 |
| Si | Si209 | 0.708480 | 0.653705 | 0.316677 |
| Si | Si210 | 0.440917 | 0.049198 | 0.181700 |
| Si | Si211 | 0.101675 | 0.542471 | 0.665836 |
| Si | Si212 | 0.447139 | 0.438335 | 0.153444 |
| Si | Si213 | 0.090601 | 0.930148 | 0.668761 |
| Si | Si214 | 0.597413 | 0.933004 | 0.815695 |
| Si | Si215 | 0.940389 | 0.435539 | 0.321576 |
| Si | Si216 | 0.589647 | 0.546251 | 0.838368 |
| Si | Si217 | 0.948149 | 0.046181 | 0.329846 |
| Si | Si218 | 0.336659 | 0.024499 | 0.340722 |
| Si | Si219 | 0.207768 | 0.517478 | 0.822852 |
| Si | Si220 | 0.327151 | 0.461209 | 0.301316 |
| Si | Si221 | 0.201361 | 0.968285 | 0.819910 |
| Si | Si222 | 0.700445 | 0.957586 | 0.653965 |

|    |       |          |          |          |
|----|-------|----------|----------|----------|
| Si | Si223 | 0.832928 | 0.460059 | 0.165622 |
| Si | Si224 | 0.706625 | 0.517772 | 0.691214 |
| Si | Si225 | 0.833744 | 0.013863 | 0.179761 |
| Si | Si226 | 0.299620 | 0.049762 | 0.557284 |
| Si | Si227 | 0.240467 | 0.554778 | 0.041681 |
| Si | Si228 | 0.297955 | 0.422843 | 0.515058 |
| Si | Si229 | 0.242538 | 0.937753 | 0.036017 |
| Si | Si230 | 0.737787 | 0.929953 | 0.438552 |
| Si | Si231 | 0.799912 | 0.425865 | 0.947421 |
| Si | Si232 | 0.741135 | 0.549971 | 0.474408 |
| Si | Si233 | 0.794941 | 0.046885 | 0.964816 |
| Si | Si234 | 0.145153 | 0.050331 | 0.538567 |
| Si | Si235 | 0.397043 | 0.556485 | 0.020129 |
| Si | Si236 | 0.141450 | 0.420785 | 0.521624 |
| Si | Si237 | 0.395074 | 0.927815 | 0.041112 |
| Si | Si238 | 0.891826 | 0.928191 | 0.460145 |
| Si | Si239 | 0.644774 | 0.424554 | 0.963084 |
| Si | Si240 | 0.896166 | 0.555108 | 0.467715 |
| Si | Si241 | 0.641472 | 0.050770 | 0.962832 |
| Si | Si242 | 0.097116 | 0.020711 | 0.326243 |
| Si | Si243 | 0.442754 | 0.516374 | 0.810873 |
| Si | Si244 | 0.089546 | 0.464181 | 0.310183 |
| Si | Si245 | 0.447573 | 0.961700 | 0.832528 |
| Si | Si246 | 0.941029 | 0.957806 | 0.671768 |
| Si | Si247 | 0.596597 | 0.461231 | 0.173815 |
| Si | Si248 | 0.951824 | 0.515697 | 0.676543 |
| Si | Si249 | 0.590412 | 0.017452 | 0.174642 |
| Si | Si250 | 0.218678 | 0.052737 | 0.197523 |
| Si | Si251 | 0.326201 | 0.538182 | 0.672233 |
| Si | Si252 | 0.205029 | 0.427201 | 0.169936 |
| Si | Si253 | 0.328599 | 0.928015 | 0.699375 |
| Si | Si254 | 0.819083 | 0.931375 | 0.803250 |
| Si | Si255 | 0.713106 | 0.435895 | 0.311505 |
| Si | Si256 | 0.835867 | 0.549509 | 0.814171 |
| Si | Si257 | 0.708286 | 0.055212 | 0.305591 |
| Si | Si258 | 0.446477 | 0.816302 | 0.185910 |
| Si | Si259 | 0.093927 | 0.315259 | 0.669684 |
| Si | Si260 | 0.444341 | 0.661150 | 0.171998 |
| Si | Si261 | 0.095599 | 0.160564 | 0.686260 |
| Si | Si262 | 0.593210 | 0.159216 | 0.816187 |
| Si | Si263 | 0.939538 | 0.664002 | 0.321102 |
| Si | Si264 | 0.598581 | 0.315361 | 0.813959 |
| Si | Si265 | 0.940475 | 0.820038 | 0.311333 |
| Si | Si266 | 0.209495 | 0.361281 | 0.813871 |

|    |       |          |          |          |
|----|-------|----------|----------|----------|
| Si | Si267 | 0.204889 | 0.125795 | 0.834242 |
| Si | Si268 | 0.704578 | 0.116123 | 0.665698 |
| Si | Si269 | 0.828249 | 0.617327 | 0.174154 |
| Si | Si270 | 0.709017 | 0.358397 | 0.667764 |
| Si | Si271 | 0.831850 | 0.854938 | 0.159162 |
| Si | Si272 | 0.291248 | 0.814959 | 0.548606 |
| Si | Si273 | 0.247249 | 0.315460 | 0.025333 |
| Si | Si274 | 0.288705 | 0.660630 | 0.548618 |
| Si | Si275 | 0.248773 | 0.159683 | 0.047141 |
| Si | Si276 | 0.748451 | 0.166730 | 0.457840 |
| Si | Si277 | 0.789243 | 0.662505 | 0.958535 |
| Si | Si278 | 0.750464 | 0.323254 | 0.452516 |
| Si | Si279 | 0.789237 | 0.818503 | 0.946652 |
| Si | Si280 | 0.138475 | 0.813211 | 0.531595 |
| Si | Si281 | 0.400243 | 0.316344 | 0.028590 |
| Si | Si282 | 0.137597 | 0.659537 | 0.522305 |
| Si | Si283 | 0.401688 | 0.162655 | 0.037516 |
| Si | Si284 | 0.902432 | 0.165941 | 0.462027 |
| Si | Si285 | 0.636014 | 0.664472 | 0.968575 |
| Si | Si286 | 0.904124 | 0.319670 | 0.465238 |
| Si | Si287 | 0.635335 | 0.818318 | 0.959265 |
| Si | Si288 | 0.088028 | 0.863937 | 0.324243 |
| Si | Si289 | 0.451664 | 0.359639 | 0.818947 |
| Si | Si290 | 0.086942 | 0.621859 | 0.306615 |
| Si | Si291 | 0.446184 | 0.119639 | 0.822932 |
| Si | Si292 | 0.949732 | 0.115517 | 0.671317 |
| Si | Si293 | 0.591847 | 0.617802 | 0.178730 |
| Si | Si294 | 0.949538 | 0.357685 | 0.682688 |
| Si | Si295 | 0.592489 | 0.860563 | 0.176708 |
| Si | Si296 | 0.204082 | 0.824653 | 0.182672 |
| Si | Si297 | 0.333066 | 0.324355 | 0.681347 |
| Si | Si298 | 0.201941 | 0.673494 | 0.183717 |
| Si | Si299 | 0.323817 | 0.169713 | 0.703310 |
| Si | Si300 | 0.827462 | 0.152590 | 0.805485 |
| Si | Si301 | 0.827249 | 0.309031 | 0.799899 |
| Si | Si302 | 0.714905 | 0.808079 | 0.291833 |
| Zn | Zn303 | 0.433560 | 0.797565 | 0.431540 |

**C<sub>4</sub>H<sub>8</sub>-Phys.Ads-ZnH-OH-Zn<sup>2+</sup>(Fig. 3/M4)** Total energy = -1927.04054925 eV

data\_

\_audit\_creation\_method 'Materials Studio'  
\_cell\_length\_a 20.357621  
\_cell\_length\_b 20.050598



|                                |     |           |          |          |
|--------------------------------|-----|-----------|----------|----------|
| _cell_length_c                 |     | 13.476578 |          |          |
| _cell_angle_alpha              |     | 90.000000 |          |          |
| _cell_angle_beta               |     | 90.000000 |          |          |
| _cell_angle_gamma              |     | 90.000000 |          |          |
| _symmetry_space_group_name_H-M |     | 'P1'      |          |          |
| loop_                          |     |           |          |          |
| _atom_site_type_symbol         |     |           |          |          |
| _atom_site_label               |     |           |          |          |
| _atom_site_fract_x             |     |           |          |          |
| _atom_site_fract_y             |     |           |          |          |
| _atom_site_fract_z             |     |           |          |          |
| H                              | H1  | 0.488790  | 0.875857 | 0.560030 |
| H                              | H2  | 0.377118  | 0.667013 | 0.446308 |
| H                              | H3  | 0.501136  | 0.888441 | 0.424683 |
| H                              | H4  | 0.572924  | 0.791410 | 0.417206 |
| H                              | H5  | 0.438547  | 0.701756 | 0.460424 |
| H                              | H6  | 0.552249  | 0.784996 | 0.644467 |
| H                              | H7  | 0.628340  | 0.782521 | 0.582596 |
| H                              | H8  | 0.523326  | 0.672731 | 0.578162 |
| H                              | H9  | 0.604004  | 0.668542 | 0.626099 |
| H                              | H10 | 0.591390  | 0.673558 | 0.496674 |
| C                              | C11 | 0.508891  | 0.857763 | 0.490185 |
| C                              | C12 | 0.551400  | 0.805492 | 0.488425 |
| C                              | C13 | 0.576372  | 0.767654 | 0.576528 |
| C                              | C14 | 0.573404  | 0.691108 | 0.568563 |
| O                              | O15 | 0.519132  | 0.030353 | 0.211919 |
| O                              | O16 | 0.028280  | 0.524633 | 0.706657 |
| O                              | O17 | 0.518050  | 0.443408 | 0.197724 |
| O                              | O18 | 0.014691  | 0.929501 | 0.703481 |
| O                              | O19 | 0.519961  | 0.944653 | 0.791602 |
| O                              | O20 | 0.010221  | 0.449053 | 0.279521 |
| O                              | O21 | 0.518790  | 0.536347 | 0.786966 |
| O                              | O22 | 0.024711  | 0.044229 | 0.296282 |
| O                              | O23 | 0.402842  | 0.053381 | 0.289176 |
| O                              | O24 | 0.152373  | 0.547358 | 0.750021 |
| O                              | O25 | 0.390779  | 0.434051 | 0.230816 |
| O                              | O26 | 0.134611  | 0.938745 | 0.775549 |
| O                              | O27 | 0.635169  | 0.924029 | 0.708720 |
| O                              | O28 | 0.886841  | 0.422123 | 0.235213 |
| O                              | O29 | 0.646532  | 0.548176 | 0.756776 |
| O                              | O30 | 0.905177  | 0.031707 | 0.226061 |
| O                              | O31 | 0.439717  | 0.121504 | 0.131301 |
| O                              | O32 | 0.097753  | 0.607157 | 0.594855 |
| O                              | O33 | 0.446333  | 0.366003 | 0.084226 |

|   |     |          |          |          |
|---|-----|----------|----------|----------|
| 0 | 034 | 0.109217 | 0.854663 | 0.627780 |
| 0 | 035 | 0.603306 | 0.858617 | 0.870211 |
| 0 | 036 | 0.941800 | 0.366742 | 0.393303 |
| 0 | 037 | 0.588995 | 0.612283 | 0.905700 |
| 0 | 038 | 0.929816 | 0.117210 | 0.372063 |
| 0 | 039 | 0.411428 | 0.993439 | 0.113398 |
| 0 | 040 | 0.123317 | 0.477360 | 0.589979 |
| 0 | 041 | 0.436086 | 0.497218 | 0.069448 |
| 0 | 042 | 0.106574 | 0.985133 | 0.593686 |
| 0 | 043 | 0.630038 | 0.988768 | 0.879312 |
| 0 | 044 | 0.912916 | 0.496526 | 0.390954 |
| 0 | 045 | 0.600767 | 0.480343 | 0.913104 |
| 0 | 046 | 0.934010 | 0.986688 | 0.407269 |
| 0 | 047 | 0.341104 | 0.047947 | 0.458656 |
| 0 | 048 | 0.214417 | 0.552561 | 0.919608 |
| 0 | 049 | 0.333328 | 0.419882 | 0.402841 |
| 0 | 050 | 0.199416 | 0.950292 | 0.945393 |
| 0 | 051 | 0.699753 | 0.922603 | 0.542055 |
| 0 | 052 | 0.827664 | 0.421023 | 0.063676 |
| 0 | 053 | 0.699862 | 0.542446 | 0.580176 |
| 0 | 054 | 0.839720 | 0.033897 | 0.058442 |
| 0 | 055 | 0.341355 | 0.941706 | 0.338366 |
| 0 | 056 | 0.194045 | 0.434362 | 0.835785 |
| 0 | 057 | 0.318647 | 0.533476 | 0.305722 |
| 0 | 058 | 0.206958 | 0.046083 | 0.809845 |
| 0 | 059 | 0.690716 | 0.035395 | 0.645525 |
| 0 | 060 | 0.844940 | 0.536891 | 0.157127 |
| 0 | 061 | 0.700512 | 0.435039 | 0.695384 |
| 0 | 062 | 0.826553 | 0.930501 | 0.180396 |
| 0 | 063 | 0.271657 | 0.049989 | 0.294757 |
| 0 | 064 | 0.279369 | 0.517428 | 0.757740 |
| 0 | 065 | 0.261398 | 0.422585 | 0.241647 |
| 0 | 066 | 0.264612 | 0.930397 | 0.778405 |
| 0 | 067 | 0.766516 | 0.936745 | 0.708921 |
| 0 | 068 | 0.758811 | 0.449625 | 0.224135 |
| 0 | 069 | 0.776041 | 0.539275 | 0.738035 |
| 0 | 070 | 0.775758 | 0.046692 | 0.229316 |
| 0 | 071 | 0.308047 | 0.113933 | 0.619666 |
| 0 | 072 | 0.216322 | 0.626239 | 0.080100 |
| 0 | 073 | 0.325416 | 0.351222 | 0.564537 |
| 0 | 074 | 0.215848 | 0.870196 | 0.096153 |
| 0 | 075 | 0.731885 | 0.857764 | 0.380313 |
| 0 | 076 | 0.810802 | 0.348629 | 0.903042 |
| 0 | 077 | 0.717265 | 0.618320 | 0.425244 |

|   |      |          |          |          |
|---|------|----------|----------|----------|
| 0 | 078  | 0.820338 | 0.110869 | 0.903922 |
| 0 | 079  | 0.223699 | 0.027961 | 0.540997 |
| 0 | 080  | 0.319084 | 0.549313 | 0.037184 |
| 0 | 081  | 0.218630 | 0.413129 | 0.497649 |
| 0 | 082  | 0.320218 | 0.928002 | 0.010483 |
| 0 | 083  | 0.815433 | 0.946186 | 0.458236 |
| 0 | 084  | 0.720204 | 0.438264 | 0.954367 |
| 0 | 085  | 0.818025 | 0.549212 | 0.499773 |
| 0 | 086  | 0.718940 | 0.048729 | 0.992275 |
| 0 | 087  | 0.331690 | 0.983484 | 0.627885 |
| 0 | 088  | 0.207668 | 0.495363 | 0.096556 |
| 0 | 089  | 0.315841 | 0.483616 | 0.573706 |
| 0 | 090  | 0.239688 | 0.999214 | 0.118707 |
| 0 | 091  | 0.706202 | 0.987983 | 0.372245 |
| 0 | 092  | 0.835691 | 0.478192 | 0.887579 |
| 0 | 093  | 0.722060 | 0.486968 | 0.405195 |
| 0 | 094  | 0.803627 | 0.980254 | 0.886389 |
| 0 | 095  | 0.135386 | 0.114501 | 0.608096 |
| 0 | 096  | 0.422921 | 0.628700 | 0.062738 |
| 0 | 097  | 0.114075 | 0.346741 | 0.564595 |
| 0 | 098  | 0.410612 | 0.861184 | 0.109933 |
| 0 | 099  | 0.901374 | 0.857439 | 0.394716 |
| 0 | 0100 | 0.626292 | 0.350319 | 0.913150 |
| 0 | 0101 | 0.910274 | 0.627117 | 0.422415 |
| 0 | 0102 | 0.623811 | 0.119444 | 0.910861 |
| 0 | 0103 | 0.118198 | 0.059937 | 0.432967 |
| 0 | 0104 | 0.412190 | 0.557788 | 0.898586 |
| 0 | 0105 | 0.102324 | 0.425185 | 0.411583 |
| 0 | 0106 | 0.443694 | 0.929227 | 0.948854 |
| 0 | 0107 | 0.919704 | 0.914276 | 0.569072 |
| 0 | 0108 | 0.622055 | 0.417580 | 0.082223 |
| 0 | 0109 | 0.939428 | 0.545485 | 0.569085 |
| 0 | 0110 | 0.595823 | 0.036676 | 0.055316 |
| 0 | 0111 | 0.146759 | 0.040629 | 0.241716 |
| 0 | 0112 | 0.403413 | 0.526878 | 0.705963 |
| 0 | 0113 | 0.131507 | 0.428339 | 0.219179 |
| 0 | 0114 | 0.394813 | 0.915900 | 0.766419 |
| 0 | 0115 | 0.892350 | 0.935860 | 0.759257 |
| 0 | 0116 | 0.634881 | 0.440208 | 0.276121 |
| 0 | 0117 | 0.905352 | 0.548983 | 0.759792 |
| 0 | 0118 | 0.645469 | 0.059543 | 0.235706 |
| 0 | 0119 | 0.099951 | 0.942296 | 0.353081 |
| 0 | 0120 | 0.439073 | 0.435746 | 0.838446 |
| 0 | 0121 | 0.102928 | 0.539919 | 0.316810 |

|   |      |          |          |          |
|---|------|----------|----------|----------|
| 0 | 0122 | 0.428214 | 0.035320 | 0.831886 |
| 0 | 0123 | 0.939777 | 0.032839 | 0.647065 |
| 0 | 0124 | 0.604624 | 0.539082 | 0.153455 |
| 0 | 0125 | 0.934334 | 0.434158 | 0.674510 |
| 0 | 0126 | 0.612349 | 0.938091 | 0.182625 |
| 0 | 0127 | 0.223902 | 0.127053 | 0.153227 |
| 0 | 0128 | 0.317516 | 0.609079 | 0.628622 |
| 0 | 0129 | 0.203937 | 0.363463 | 0.090741 |
| 0 | 0130 | 0.318096 | 0.851450 | 0.645669 |
| 0 | 0131 | 0.810478 | 0.852258 | 0.844294 |
| 0 | 0132 | 0.721769 | 0.360026 | 0.358347 |
| 0 | 0133 | 0.828238 | 0.611040 | 0.883546 |
| 0 | 0134 | 0.719267 | 0.120575 | 0.366264 |
| 0 | 0135 | 0.520761 | 0.847537 | 0.216883 |
| 0 | 0136 | 0.026105 | 0.342579 | 0.711985 |
| 0 | 0137 | 0.514138 | 0.629082 | 0.205042 |
| 0 | 0138 | 0.023405 | 0.124496 | 0.711084 |
| 0 | 0139 | 0.520799 | 0.124642 | 0.788539 |
| 0 | 0140 | 0.006420 | 0.626809 | 0.288470 |
| 0 | 0141 | 0.527063 | 0.345626 | 0.784034 |
| 0 | 0142 | 0.013521 | 0.851479 | 0.294233 |
| 0 | 0143 | 0.408412 | 0.817331 | 0.295871 |
| 0 | 0144 | 0.151829 | 0.323976 | 0.749686 |
| 0 | 0145 | 0.390497 | 0.651948 | 0.253298 |
| 0 | 0146 | 0.137049 | 0.156504 | 0.794388 |
| 0 | 0147 | 0.639280 | 0.146448 | 0.719998 |
| 0 | 0148 | 0.885359 | 0.652485 | 0.232677 |
| 0 | 0149 | 0.647908 | 0.317335 | 0.723555 |
| 0 | 0150 | 0.902382 | 0.823674 | 0.204025 |
| 0 | 0151 | 0.457392 | 0.741247 | 0.148116 |
| 0 | 0152 | 0.086480 | 0.232359 | 0.650322 |
| 0 | 0153 | 0.585397 | 0.234739 | 0.843054 |
| 0 | 0154 | 0.948628 | 0.740642 | 0.342225 |
| 0 | 0155 | 0.339848 | 0.822314 | 0.456627 |
| 0 | 0156 | 0.220641 | 0.314439 | 0.911349 |
| 0 | 0157 | 0.332206 | 0.646324 | 0.439100 |
| 0 | 0158 | 0.205239 | 0.134585 | 0.959280 |
| 0 | 0159 | 0.705763 | 0.151141 | 0.556476 |
| 0 | 0160 | 0.817508 | 0.652233 | 0.069719 |
| 0 | 0161 | 0.706809 | 0.341988 | 0.552220 |
| 0 | 0162 | 0.835542 | 0.838121 | 0.037006 |
| 0 | 0163 | 0.265978 | 0.828579 | 0.268818 |
| 0 | 0164 | 0.279418 | 0.354162 | 0.747340 |
| 0 | 0165 | 0.247513 | 0.654077 | 0.269829 |

|    |       |          |          |          |
|----|-------|----------|----------|----------|
| 0  | 0166  | 0.268806 | 0.160977 | 0.794780 |
| 0  | 0167  | 0.768804 | 0.125534 | 0.725244 |
| 0  | 0168  | 0.758862 | 0.619819 | 0.238214 |
| 0  | 0169  | 0.778696 | 0.330224 | 0.712873 |
| 0  | 0170  | 0.771780 | 0.812997 | 0.202817 |
| 0  | 0171  | 0.293920 | 0.731398 | 0.580321 |
| 0  | 0172  | 0.244891 | 0.239993 | 0.066484 |
| 0  | 0173  | 0.741913 | 0.242387 | 0.428962 |
| 0  | 0174  | 0.796152 | 0.735419 | 0.923376 |
| 0  | 0175  | 0.216580 | 0.831186 | 0.522001 |
| 0  | 0176  | 0.325316 | 0.340402 | 0.023045 |
| 0  | 0177  | 0.213106 | 0.634286 | 0.513089 |
| 0  | 0178  | 0.326775 | 0.138941 | 0.031473 |
| 0  | 0179  | 0.824355 | 0.144645 | 0.479054 |
| 0  | 0180  | 0.711016 | 0.637234 | 0.958288 |
| 0  | 0181  | 0.825970 | 0.339723 | 0.473707 |
| 0  | 0182  | 0.713135 | 0.833203 | 0.972800 |
| 0  | 0183  | 0.132602 | 0.732552 | 0.565120 |
| 0  | 0184  | 0.408021 | 0.240725 | 0.065998 |
| 0  | 0185  | 0.908525 | 0.240771 | 0.426767 |
| 0  | 0186  | 0.626503 | 0.737551 | 0.929829 |
| 0  | 0187  | 0.099994 | 0.824193 | 0.434519 |
| 0  | 0188  | 0.427915 | 0.312958 | 0.905908 |
| 0  | 0189  | 0.103752 | 0.655655 | 0.410806 |
| 0  | 0190  | 0.441379 | 0.145251 | 0.939289 |
| 0  | 0191  | 0.941290 | 0.151294 | 0.563423 |
| 0  | 0192  | 0.614423 | 0.661632 | 0.086624 |
| 0  | 0193  | 0.934812 | 0.319672 | 0.577097 |
| 0  | 0194  | 0.598095 | 0.833426 | 0.061687 |
| 0  | 0195  | 0.136997 | 0.838395 | 0.244702 |
| 0  | 0196  | 0.406589 | 0.336336 | 0.715580 |
| 0  | 0197  | 0.123145 | 0.651670 | 0.214290 |
| 0  | 0198  | 0.396221 | 0.151604 | 0.754045 |
| 0  | 0199  | 0.897208 | 0.137802 | 0.749134 |
| 0  | 0200  | 0.633249 | 0.639183 | 0.277995 |
| 0  | 0201  | 0.903172 | 0.322296 | 0.768145 |
| 0  | 0202  | 0.644559 | 0.818239 | 0.245722 |
| 0  | 0203  | 0.201488 | 0.746570 | 0.145514 |
| 0  | 0204  | 0.322343 | 0.240529 | 0.663765 |
| 0  | 0205  | 0.817738 | 0.229435 | 0.824438 |
| 0  | 0206  | 0.720488 | 0.731219 | 0.334141 |
| Al | Al207 | 0.332479 | 0.856880 | 0.333727 |
| Al | Al208 | 0.320455 | 0.618619 | 0.305727 |
| Si | Si209 | 0.707689 | 0.652283 | 0.317218 |

|    |       |          |          |          |
|----|-------|----------|----------|----------|
| Si | Si210 | 0.443289 | 0.049501 | 0.186322 |
| Si | Si211 | 0.100378 | 0.538895 | 0.659898 |
| Si | Si212 | 0.446422 | 0.435560 | 0.146272 |
| Si | Si213 | 0.092024 | 0.927182 | 0.675141 |
| Si | Si214 | 0.596711 | 0.929636 | 0.813952 |
| Si | Si215 | 0.938379 | 0.433587 | 0.325405 |
| Si | Si216 | 0.589577 | 0.543941 | 0.840599 |
| Si | Si217 | 0.947878 | 0.044934 | 0.325702 |
| Si | Si218 | 0.338998 | 0.021171 | 0.344530 |
| Si | Si219 | 0.209733 | 0.512815 | 0.815993 |
| Si | Si220 | 0.326102 | 0.454842 | 0.294401 |
| Si | Si221 | 0.201158 | 0.966216 | 0.827946 |
| Si | Si222 | 0.698625 | 0.955239 | 0.652275 |
| Si | Si223 | 0.829640 | 0.457662 | 0.170537 |
| Si | Si224 | 0.705996 | 0.515730 | 0.693144 |
| Si | Si225 | 0.836779 | 0.010802 | 0.173511 |
| Si | Si226 | 0.300950 | 0.043797 | 0.561657 |
| Si | Si227 | 0.239488 | 0.556061 | 0.033732 |
| Si | Si228 | 0.297928 | 0.417191 | 0.509366 |
| Si | Si229 | 0.243449 | 0.936397 | 0.043794 |
| Si | Si230 | 0.738759 | 0.928535 | 0.437281 |
| Si | Si231 | 0.798372 | 0.421375 | 0.952209 |
| Si | Si232 | 0.739765 | 0.549003 | 0.476829 |
| Si | Si233 | 0.795791 | 0.043747 | 0.959423 |
| Si | Si234 | 0.146234 | 0.047038 | 0.543983 |
| Si | Si235 | 0.396996 | 0.558447 | 0.017165 |
| Si | Si236 | 0.140209 | 0.415882 | 0.515677 |
| Si | Si237 | 0.396217 | 0.928291 | 0.046243 |
| Si | Si238 | 0.892874 | 0.926036 | 0.457101 |
| Si | Si239 | 0.642509 | 0.421279 | 0.966093 |
| Si | Si240 | 0.895118 | 0.554391 | 0.470479 |
| Si | Si241 | 0.642323 | 0.048197 | 0.959450 |
| Si | Si242 | 0.097517 | 0.021668 | 0.331038 |
| Si | Si243 | 0.443400 | 0.514157 | 0.808524 |
| Si | Si244 | 0.087167 | 0.460802 | 0.306108 |
| Si | Si245 | 0.446515 | 0.956522 | 0.835140 |
| Si | Si246 | 0.942151 | 0.953341 | 0.669503 |
| Si | Si247 | 0.594443 | 0.459973 | 0.176703 |
| Si | Si248 | 0.951775 | 0.513201 | 0.677946 |
| Si | Si249 | 0.592833 | 0.016570 | 0.172035 |
| Si | Si250 | 0.220787 | 0.053470 | 0.202895 |
| Si | Si251 | 0.328514 | 0.532752 | 0.666540 |
| Si | Si252 | 0.201912 | 0.428183 | 0.162696 |
| Si | Si253 | 0.326577 | 0.921461 | 0.704689 |

|    |       |          |          |          |
|----|-------|----------|----------|----------|
| Si | Si254 | 0.818212 | 0.926809 | 0.799322 |
| Si | Si255 | 0.709637 | 0.434459 | 0.315960 |
| Si | Si256 | 0.835730 | 0.544096 | 0.817548 |
| Si | Si257 | 0.712150 | 0.053343 | 0.301061 |
| Si | Si258 | 0.448991 | 0.815933 | 0.190864 |
| Si | Si259 | 0.094512 | 0.311618 | 0.669129 |
| Si | Si260 | 0.444432 | 0.661933 | 0.168785 |
| Si | Si261 | 0.095397 | 0.156987 | 0.691097 |
| Si | Si262 | 0.591982 | 0.156634 | 0.815256 |
| Si | Si263 | 0.938169 | 0.661812 | 0.321457 |
| Si | Si264 | 0.596696 | 0.312475 | 0.815929 |
| Si | Si265 | 0.942037 | 0.817920 | 0.308750 |
| Si | Si266 | 0.211552 | 0.357062 | 0.810666 |
| Si | Si267 | 0.204082 | 0.124507 | 0.840006 |
| Si | Si268 | 0.701503 | 0.114567 | 0.662875 |
| Si | Si269 | 0.826764 | 0.614827 | 0.174819 |
| Si | Si270 | 0.708364 | 0.356243 | 0.670718 |
| Si | Si271 | 0.834844 | 0.851689 | 0.155755 |
| Si | Si272 | 0.291306 | 0.810265 | 0.551170 |
| Si | Si273 | 0.248944 | 0.315020 | 0.023776 |
| Si | Si274 | 0.286614 | 0.655352 | 0.543717 |
| Si | Si275 | 0.250330 | 0.160308 | 0.051649 |
| Si | Si276 | 0.748098 | 0.164395 | 0.456908 |
| Si | Si277 | 0.788229 | 0.658711 | 0.958630 |
| Si | Si278 | 0.749132 | 0.320736 | 0.454562 |
| Si | Si279 | 0.789065 | 0.814382 | 0.945204 |
| Si | Si280 | 0.139046 | 0.811221 | 0.537078 |
| Si | Si281 | 0.401658 | 0.315240 | 0.020114 |
| Si | Si282 | 0.135644 | 0.657412 | 0.520342 |
| Si | Si283 | 0.403498 | 0.161562 | 0.042297 |
| Si | Si284 | 0.901405 | 0.163306 | 0.460509 |
| Si | Si285 | 0.635127 | 0.661751 | 0.970318 |
| Si | Si286 | 0.902728 | 0.316888 | 0.467245 |
| Si | Si287 | 0.635592 | 0.815475 | 0.959030 |
| Si | Si288 | 0.088539 | 0.863828 | 0.330583 |
| Si | Si289 | 0.450240 | 0.357686 | 0.811011 |
| Si | Si290 | 0.084812 | 0.618534 | 0.306820 |
| Si | Si291 | 0.446295 | 0.114303 | 0.828714 |
| Si | Si292 | 0.950052 | 0.111755 | 0.667920 |
| Si | Si293 | 0.590854 | 0.616720 | 0.180887 |
| Si | Si294 | 0.949685 | 0.354930 | 0.683045 |
| Si | Si295 | 0.594492 | 0.859507 | 0.175250 |
| Si | Si296 | 0.206854 | 0.821034 | 0.191225 |
| Si | Si297 | 0.333432 | 0.319901 | 0.674134 |

|    |       |          |          |          |
|----|-------|----------|----------|----------|
| Si | Si298 | 0.198496 | 0.669152 | 0.179391 |
| Si | Si299 | 0.324007 | 0.165791 | 0.707970 |
| Si | Si300 | 0.826224 | 0.151010 | 0.799839 |
| Si | Si301 | 0.827903 | 0.307973 | 0.802207 |
| Si | Si302 | 0.717656 | 0.806238 | 0.290420 |
| Zn | Zn303 | 0.433114 | 0.776917 | 0.432433 |

**ZnH-OH-Zn<sup>2+</sup> (Fig. 3/M5)** Total energy = -1865.12577695 eV

data\_

\_audit\_creation\_method 'Materials Studio'

\_cell\_length\_a 20.357621

\_cell\_length\_b 20.050598

\_cell\_length\_c 13.476578

\_cell\_angle\_alpha 90.000000

\_cell\_angle\_beta 90.000000

\_cell\_angle\_gamma 90.000000

\_symmetry\_space\_group\_name\_H-M 'P1'

loop\_

\_atom\_site\_type\_symbol

\_atom\_site\_label

\_atom\_site\_fract\_x

\_atom\_site\_fract\_y

\_atom\_site\_fract\_z

|   |     |          |          |          |
|---|-----|----------|----------|----------|
| H | H1  | 0.380828 | 0.639750 | 0.459881 |
| H | H2  | 0.468623 | 0.724714 | 0.479030 |
| O | O3  | 0.519086 | 0.030166 | 0.211376 |
| O | O4  | 0.028130 | 0.525216 | 0.707136 |
| O | O5  | 0.518068 | 0.442199 | 0.199194 |
| O | O6  | 0.014830 | 0.929559 | 0.702879 |
| O | O7  | 0.520335 | 0.945801 | 0.791173 |
| O | O8  | 0.009779 | 0.448704 | 0.280026 |
| O | O9  | 0.519128 | 0.535636 | 0.787996 |
| O | O10 | 0.024597 | 0.044419 | 0.296213 |
| O | O11 | 0.402723 | 0.053185 | 0.288861 |
| O | O12 | 0.152527 | 0.547314 | 0.749213 |
| O | O13 | 0.390435 | 0.430727 | 0.230539 |
| O | O14 | 0.134930 | 0.939293 | 0.773457 |
| O | O15 | 0.636188 | 0.923578 | 0.710068 |
| O | O16 | 0.886319 | 0.421884 | 0.236501 |
| O | O17 | 0.646922 | 0.547416 | 0.758255 |
| O | O18 | 0.905176 | 0.031418 | 0.225914 |
| O | O19 | 0.439567 | 0.120899 | 0.130742 |
| O | O20 | 0.098152 | 0.607383 | 0.594916 |



|   |     |          |          |          |
|---|-----|----------|----------|----------|
| 0 | 021 | 0.447324 | 0.365418 | 0.082866 |
| 0 | 022 | 0.108938 | 0.855206 | 0.625346 |
| 0 | 023 | 0.602277 | 0.859157 | 0.871986 |
| 0 | 024 | 0.941827 | 0.366421 | 0.394153 |
| 0 | 025 | 0.588813 | 0.612114 | 0.906425 |
| 0 | 026 | 0.929339 | 0.116905 | 0.371924 |
| 0 | 027 | 0.410917 | 0.992743 | 0.113884 |
| 0 | 028 | 0.122082 | 0.477428 | 0.589351 |
| 0 | 029 | 0.436295 | 0.496913 | 0.072160 |
| 0 | 030 | 0.106194 | 0.985648 | 0.592190 |
| 0 | 031 | 0.630177 | 0.988906 | 0.879607 |
| 0 | 032 | 0.913052 | 0.496181 | 0.392311 |
| 0 | 033 | 0.600689 | 0.480294 | 0.914929 |
| 0 | 034 | 0.934394 | 0.986292 | 0.407156 |
| 0 | 035 | 0.340479 | 0.049850 | 0.457963 |
| 0 | 036 | 0.212549 | 0.553511 | 0.920375 |
| 0 | 037 | 0.333003 | 0.423750 | 0.403585 |
| 0 | 038 | 0.199940 | 0.951645 | 0.942532 |
| 0 | 039 | 0.699978 | 0.924090 | 0.542025 |
| 0 | 040 | 0.827686 | 0.420622 | 0.064619 |
| 0 | 041 | 0.700086 | 0.541972 | 0.581053 |
| 0 | 042 | 0.839962 | 0.033747 | 0.058078 |
| 0 | 043 | 0.340155 | 0.942433 | 0.340561 |
| 0 | 044 | 0.193164 | 0.434575 | 0.836846 |
| 0 | 045 | 0.323291 | 0.535137 | 0.298966 |
| 0 | 046 | 0.208911 | 0.046217 | 0.806164 |
| 0 | 047 | 0.690679 | 0.035589 | 0.648246 |
| 0 | 048 | 0.844960 | 0.536635 | 0.157633 |
| 0 | 049 | 0.700938 | 0.434735 | 0.696282 |
| 0 | 050 | 0.826226 | 0.930620 | 0.180590 |
| 0 | 051 | 0.271468 | 0.050358 | 0.293485 |
| 0 | 052 | 0.279205 | 0.517277 | 0.760757 |
| 0 | 053 | 0.260521 | 0.425232 | 0.242820 |
| 0 | 054 | 0.264485 | 0.929038 | 0.774748 |
| 0 | 055 | 0.767387 | 0.936842 | 0.708322 |
| 0 | 056 | 0.758455 | 0.449647 | 0.224578 |
| 0 | 057 | 0.776347 | 0.538996 | 0.738750 |
| 0 | 058 | 0.775781 | 0.047240 | 0.228450 |
| 0 | 059 | 0.307777 | 0.115744 | 0.618742 |
| 0 | 060 | 0.219705 | 0.625772 | 0.082787 |
| 0 | 061 | 0.325715 | 0.353019 | 0.564265 |
| 0 | 062 | 0.214210 | 0.869444 | 0.090748 |
| 0 | 063 | 0.732481 | 0.857921 | 0.380739 |
| 0 | 064 | 0.810698 | 0.348758 | 0.903536 |

|   |      |          |          |          |
|---|------|----------|----------|----------|
| 0 | 065  | 0.716859 | 0.618344 | 0.426225 |
| 0 | 066  | 0.820569 | 0.110649 | 0.903524 |
| 0 | 067  | 0.223751 | 0.028573 | 0.541438 |
| 0 | 068  | 0.318317 | 0.544992 | 0.035023 |
| 0 | 069  | 0.218587 | 0.414702 | 0.498363 |
| 0 | 070  | 0.319868 | 0.928219 | 0.008941 |
| 0 | 071  | 0.815587 | 0.946690 | 0.457975 |
| 0 | 072  | 0.720150 | 0.438149 | 0.955682 |
| 0 | 073  | 0.818060 | 0.549734 | 0.499987 |
| 0 | 074  | 0.719083 | 0.049086 | 0.992134 |
| 0 | 075  | 0.332320 | 0.985613 | 0.627986 |
| 0 | 076  | 0.205498 | 0.495044 | 0.095841 |
| 0 | 077  | 0.315630 | 0.485328 | 0.575457 |
| 0 | 078  | 0.239143 | 0.997895 | 0.118596 |
| 0 | 079  | 0.706604 | 0.988033 | 0.371266 |
| 0 | 080  | 0.835654 | 0.478290 | 0.888933 |
| 0 | 081  | 0.722303 | 0.486948 | 0.405994 |
| 0 | 082  | 0.803586 | 0.980082 | 0.886320 |
| 0 | 083  | 0.134969 | 0.115051 | 0.606829 |
| 0 | 084  | 0.417812 | 0.627770 | 0.069958 |
| 0 | 085  | 0.115040 | 0.346503 | 0.565455 |
| 0 | 086  | 0.410293 | 0.860656 | 0.105813 |
| 0 | 087  | 0.901236 | 0.857130 | 0.395398 |
| 0 | 088  | 0.626274 | 0.350271 | 0.913700 |
| 0 | 089  | 0.910987 | 0.626870 | 0.421867 |
| 0 | 090  | 0.623887 | 0.119680 | 0.910460 |
| 0 | 091  | 0.118826 | 0.060149 | 0.431735 |
| 0 | 092  | 0.413977 | 0.558666 | 0.901928 |
| 0 | 093  | 0.102302 | 0.423877 | 0.411509 |
| 0 | 094  | 0.443525 | 0.930739 | 0.947410 |
| 0 | 095  | 0.919539 | 0.914184 | 0.569261 |
| 0 | 096  | 0.621984 | 0.416728 | 0.083365 |
| 0 | 097  | 0.939308 | 0.546367 | 0.569823 |
| 0 | 098  | 0.595903 | 0.037337 | 0.055247 |
| 0 | 099  | 0.146443 | 0.040050 | 0.240700 |
| 0 | 0100 | 0.403228 | 0.527077 | 0.709179 |
| 0 | 0101 | 0.130788 | 0.427556 | 0.219205 |
| 0 | 0102 | 0.394753 | 0.916048 | 0.765472 |
| 0 | 0103 | 0.892824 | 0.935477 | 0.760010 |
| 0 | 0104 | 0.634798 | 0.440174 | 0.277336 |
| 0 | 0105 | 0.905474 | 0.548625 | 0.760898 |
| 0 | 0106 | 0.645405 | 0.059868 | 0.235589 |
| 0 | 0107 | 0.099647 | 0.942204 | 0.352909 |
| 0 | 0108 | 0.438793 | 0.435975 | 0.841476 |

|   |      |          |          |          |
|---|------|----------|----------|----------|
| 0 | 0109 | 0.102782 | 0.539019 | 0.318103 |
| 0 | 0110 | 0.427549 | 0.035838 | 0.829168 |
| 0 | 0111 | 0.939431 | 0.032661 | 0.647342 |
| 0 | 0112 | 0.604042 | 0.538325 | 0.153499 |
| 0 | 0113 | 0.934586 | 0.434395 | 0.673484 |
| 0 | 0114 | 0.612694 | 0.938376 | 0.181890 |
| 0 | 0115 | 0.223311 | 0.126268 | 0.151469 |
| 0 | 0116 | 0.317501 | 0.609830 | 0.633289 |
| 0 | 0117 | 0.204851 | 0.362898 | 0.092505 |
| 0 | 0118 | 0.320092 | 0.853314 | 0.639168 |
| 0 | 0119 | 0.810596 | 0.852097 | 0.844420 |
| 0 | 0120 | 0.721872 | 0.360004 | 0.359031 |
| 0 | 0121 | 0.828475 | 0.611068 | 0.884285 |
| 0 | 0122 | 0.719531 | 0.120723 | 0.365769 |
| 0 | 0123 | 0.519904 | 0.848870 | 0.215218 |
| 0 | 0124 | 0.026231 | 0.343126 | 0.711960 |
| 0 | 0125 | 0.514335 | 0.628594 | 0.204349 |
| 0 | 0126 | 0.023364 | 0.124128 | 0.710942 |
| 0 | 0127 | 0.520809 | 0.124907 | 0.787952 |
| 0 | 0128 | 0.007295 | 0.627170 | 0.287935 |
| 0 | 0129 | 0.526947 | 0.346340 | 0.784760 |
| 0 | 0130 | 0.012816 | 0.851676 | 0.293803 |
| 0 | 0131 | 0.406498 | 0.818125 | 0.291133 |
| 0 | 0132 | 0.151681 | 0.323829 | 0.750847 |
| 0 | 0133 | 0.393951 | 0.656904 | 0.262614 |
| 0 | 0134 | 0.137122 | 0.155773 | 0.793721 |
| 0 | 0135 | 0.639301 | 0.147544 | 0.719869 |
| 0 | 0136 | 0.886070 | 0.652086 | 0.232043 |
| 0 | 0137 | 0.647680 | 0.317373 | 0.724044 |
| 0 | 0138 | 0.901280 | 0.823341 | 0.204660 |
| 0 | 0139 | 0.458002 | 0.741353 | 0.146889 |
| 0 | 0140 | 0.086118 | 0.232471 | 0.651091 |
| 0 | 0141 | 0.584685 | 0.235006 | 0.843404 |
| 0 | 0142 | 0.948914 | 0.740524 | 0.341967 |
| 0 | 0143 | 0.337814 | 0.818417 | 0.449858 |
| 0 | 0144 | 0.221279 | 0.315128 | 0.911805 |
| 0 | 0145 | 0.334214 | 0.641572 | 0.444050 |
| 0 | 0146 | 0.205648 | 0.133543 | 0.957720 |
| 0 | 0147 | 0.705379 | 0.150402 | 0.556080 |
| 0 | 0148 | 0.816860 | 0.651943 | 0.070470 |
| 0 | 0149 | 0.706771 | 0.341809 | 0.552849 |
| 0 | 0150 | 0.835103 | 0.838228 | 0.037353 |
| 0 | 0151 | 0.264639 | 0.831029 | 0.264222 |
| 0 | 0152 | 0.278921 | 0.355425 | 0.746753 |

|    |       |          |          |          |
|----|-------|----------|----------|----------|
| 0  | 0153  | 0.249769 | 0.656636 | 0.271726 |
| 0  | 0154  | 0.268790 | 0.162414 | 0.793950 |
| 0  | 0155  | 0.768793 | 0.126863 | 0.725053 |
| 0  | 0156  | 0.759413 | 0.619446 | 0.240071 |
| 0  | 0157  | 0.778641 | 0.329616 | 0.713432 |
| 0  | 0158  | 0.770473 | 0.813500 | 0.202672 |
| 0  | 0159  | 0.294564 | 0.731672 | 0.580280 |
| 0  | 0160  | 0.244675 | 0.239339 | 0.065385 |
| 0  | 0161  | 0.741810 | 0.242258 | 0.429531 |
| 0  | 0162  | 0.796258 | 0.735387 | 0.924053 |
| 0  | 0163  | 0.216659 | 0.830942 | 0.520923 |
| 0  | 0164  | 0.325753 | 0.339950 | 0.024176 |
| 0  | 0165  | 0.213740 | 0.634825 | 0.513563 |
| 0  | 0166  | 0.326789 | 0.138502 | 0.030927 |
| 0  | 0167  | 0.824237 | 0.144581 | 0.479672 |
| 0  | 0168  | 0.710962 | 0.637179 | 0.957860 |
| 0  | 0169  | 0.825957 | 0.339460 | 0.474413 |
| 0  | 0170  | 0.712915 | 0.833263 | 0.972265 |
| 0  | 0171  | 0.132657 | 0.732820 | 0.564587 |
| 0  | 0172  | 0.408268 | 0.240124 | 0.065705 |
| 0  | 0173  | 0.908496 | 0.240504 | 0.427021 |
| 0  | 0174  | 0.626219 | 0.737582 | 0.930451 |
| 0  | 0175  | 0.100803 | 0.823391 | 0.431839 |
| 0  | 0176  | 0.427351 | 0.312325 | 0.905155 |
| 0  | 0177  | 0.104714 | 0.655227 | 0.410607 |
| 0  | 0178  | 0.441274 | 0.144776 | 0.938642 |
| 0  | 0179  | 0.941525 | 0.150888 | 0.563108 |
| 0  | 0180  | 0.614762 | 0.661130 | 0.086826 |
| 0  | 0181  | 0.934775 | 0.319202 | 0.577753 |
| 0  | 0182  | 0.598439 | 0.832789 | 0.062926 |
| 0  | 0183  | 0.135609 | 0.839357 | 0.241148 |
| 0  | 0184  | 0.406418 | 0.338412 | 0.715581 |
| 0  | 0185  | 0.125221 | 0.649768 | 0.215146 |
| 0  | 0186  | 0.396304 | 0.152885 | 0.753480 |
| 0  | 0187  | 0.897275 | 0.138031 | 0.748819 |
| 0  | 0188  | 0.633556 | 0.638214 | 0.277893 |
| 0  | 0189  | 0.903257 | 0.323163 | 0.768788 |
| 0  | 0190  | 0.643693 | 0.818688 | 0.247532 |
| 0  | 0191  | 0.200825 | 0.746318 | 0.145114 |
| 0  | 0192  | 0.322695 | 0.242089 | 0.663418 |
| 0  | 0193  | 0.818680 | 0.229606 | 0.825650 |
| 0  | 0194  | 0.720602 | 0.731118 | 0.333678 |
| Al | Al195 | 0.330574 | 0.858255 | 0.330649 |
| Al | Al196 | 0.322389 | 0.620018 | 0.305452 |

|    |       |          |          |          |
|----|-------|----------|----------|----------|
| Si | Si197 | 0.707594 | 0.652257 | 0.318167 |
| Si | Si198 | 0.443264 | 0.049033 | 0.186121 |
| Si | Si199 | 0.100008 | 0.538976 | 0.659750 |
| Si | Si200 | 0.446808 | 0.434114 | 0.146882 |
| Si | Si201 | 0.091917 | 0.927596 | 0.673534 |
| Si | Si202 | 0.596792 | 0.929694 | 0.814206 |
| Si | Si203 | 0.938009 | 0.433271 | 0.326407 |
| Si | Si204 | 0.589908 | 0.543671 | 0.841743 |
| Si | Si205 | 0.947718 | 0.044684 | 0.325624 |
| Si | Si206 | 0.338599 | 0.022051 | 0.344517 |
| Si | Si207 | 0.208826 | 0.512974 | 0.817213 |
| Si | Si208 | 0.326784 | 0.455707 | 0.293053 |
| Si | Si209 | 0.201986 | 0.966389 | 0.824763 |
| Si | Si210 | 0.698954 | 0.955312 | 0.652899 |
| Si | Si211 | 0.829404 | 0.457509 | 0.171304 |
| Si | Si212 | 0.706267 | 0.515463 | 0.693990 |
| Si | Si213 | 0.836702 | 0.010822 | 0.173211 |
| Si | Si214 | 0.300928 | 0.045315 | 0.561429 |
| Si | Si215 | 0.239071 | 0.555140 | 0.033946 |
| Si | Si216 | 0.297769 | 0.419113 | 0.510093 |
| Si | Si217 | 0.242951 | 0.936377 | 0.041357 |
| Si | Si218 | 0.738819 | 0.928837 | 0.437269 |
| Si | Si219 | 0.798328 | 0.421323 | 0.953196 |
| Si | Si220 | 0.739668 | 0.549186 | 0.477592 |
| Si | Si221 | 0.795877 | 0.043641 | 0.959200 |
| Si | Si222 | 0.146235 | 0.047509 | 0.543119 |
| Si | Si223 | 0.396273 | 0.557312 | 0.019768 |
| Si | Si224 | 0.140006 | 0.415798 | 0.515933 |
| Si | Si225 | 0.395928 | 0.928770 | 0.044243 |
| Si | Si226 | 0.892770 | 0.925988 | 0.457243 |
| Si | Si227 | 0.642496 | 0.421023 | 0.967234 |
| Si | Si228 | 0.895124 | 0.554609 | 0.470883 |
| Si | Si229 | 0.642433 | 0.048443 | 0.959288 |
| Si | Si230 | 0.097369 | 0.021603 | 0.330461 |
| Si | Si231 | 0.443904 | 0.514328 | 0.811379 |
| Si | Si232 | 0.086700 | 0.459953 | 0.306528 |
| Si | Si233 | 0.446636 | 0.957182 | 0.833209 |
| Si | Si234 | 0.942020 | 0.953161 | 0.669671 |
| Si | Si235 | 0.594420 | 0.459294 | 0.177667 |
| Si | Si236 | 0.951610 | 0.513489 | 0.678253 |
| Si | Si237 | 0.592956 | 0.016774 | 0.171778 |
| Si | Si238 | 0.220409 | 0.052919 | 0.201830 |
| Si | Si239 | 0.328391 | 0.532914 | 0.670109 |
| Si | Si240 | 0.201236 | 0.428182 | 0.163039 |

|    |       |          |          |          |
|----|-------|----------|----------|----------|
| Si | Si241 | 0.327408 | 0.922098 | 0.701969 |
| Si | Si242 | 0.818418 | 0.926597 | 0.799352 |
| Si | Si243 | 0.709666 | 0.434489 | 0.316886 |
| Si | Si244 | 0.835780 | 0.544029 | 0.818552 |
| Si | Si245 | 0.712264 | 0.053495 | 0.300529 |
| Si | Si246 | 0.449188 | 0.816688 | 0.187153 |
| Si | Si247 | 0.094551 | 0.311625 | 0.669844 |
| Si | Si248 | 0.444839 | 0.662678 | 0.171652 |
| Si | Si249 | 0.095158 | 0.156841 | 0.690755 |
| Si | Si250 | 0.591903 | 0.156962 | 0.815122 |
| Si | Si251 | 0.938640 | 0.661719 | 0.320955 |
| Si | Si252 | 0.596501 | 0.312658 | 0.816427 |
| Si | Si253 | 0.941430 | 0.817829 | 0.308855 |
| Si | Si254 | 0.211393 | 0.357445 | 0.811120 |
| Si | Si255 | 0.204677 | 0.124328 | 0.838277 |
| Si | Si256 | 0.701393 | 0.114855 | 0.663297 |
| Si | Si257 | 0.826725 | 0.614603 | 0.175479 |
| Si | Si258 | 0.708407 | 0.355997 | 0.671361 |
| Si | Si259 | 0.833878 | 0.851715 | 0.156118 |
| Si | Si260 | 0.291672 | 0.810211 | 0.548066 |
| Si | Si261 | 0.249377 | 0.314707 | 0.024300 |
| Si | Si262 | 0.286496 | 0.655225 | 0.547710 |
| Si | Si263 | 0.250253 | 0.159642 | 0.050354 |
| Si | Si264 | 0.747977 | 0.164153 | 0.457000 |
| Si | Si265 | 0.788144 | 0.658713 | 0.959075 |
| Si | Si266 | 0.749090 | 0.320551 | 0.455193 |
| Si | Si267 | 0.788869 | 0.814405 | 0.945310 |
| Si | Si268 | 0.139015 | 0.811405 | 0.535378 |
| Si | Si269 | 0.401986 | 0.314574 | 0.019823 |
| Si | Si270 | 0.135810 | 0.657637 | 0.520425 |
| Si | Si271 | 0.403553 | 0.160975 | 0.041718 |
| Si | Si272 | 0.901243 | 0.162992 | 0.460580 |
| Si | Si273 | 0.635165 | 0.661807 | 0.970345 |
| Si | Si274 | 0.902644 | 0.316493 | 0.467878 |
| Si | Si275 | 0.635301 | 0.815551 | 0.959516 |
| Si | Si276 | 0.088012 | 0.863968 | 0.328911 |
| Si | Si277 | 0.450136 | 0.358209 | 0.811729 |
| Si | Si278 | 0.085359 | 0.617733 | 0.307108 |
| Si | Si279 | 0.446206 | 0.114636 | 0.827516 |
| Si | Si280 | 0.949949 | 0.111540 | 0.667805 |
| Si | Si281 | 0.591315 | 0.616151 | 0.180851 |
| Si | Si282 | 0.949696 | 0.355172 | 0.683145 |
| Si | Si283 | 0.594491 | 0.859838 | 0.175964 |
| Si | Si284 | 0.205315 | 0.821790 | 0.187534 |

|    |       |          |          |          |
|----|-------|----------|----------|----------|
| Si | Si285 | 0.333441 | 0.321429 | 0.673959 |
| Si | Si286 | 0.199977 | 0.669275 | 0.180624 |
| Si | Si287 | 0.324166 | 0.167204 | 0.707338 |
| Si | Si288 | 0.826415 | 0.151262 | 0.799927 |
| Si | Si289 | 0.828087 | 0.308102 | 0.802863 |
| Si | Si290 | 0.716915 | 0.806414 | 0.291414 |
| Zn | Zn291 | 0.427957 | 0.771060 | 0.415349 |

**TS-H<sub>2</sub>-Dis-Zn<sup>2+</sup> (Fig. 3/TS4)** Total energy = -1864.73065817 eV

data\_

\_audit\_creation\_method 'Materials Studio'

\_cell\_length\_a 20.357621

\_cell\_length\_b 20.050598

\_cell\_length\_c 13.476578

\_cell\_angle\_alpha 90.000000

\_cell\_angle\_beta 90.000000

\_cell\_angle\_gamma 90.000000

\_symmetry\_space\_group\_name\_H-M 'P1'

loop\_

\_atom\_site\_type\_symbol

\_atom\_site\_label

\_atom\_site\_fract\_x

\_atom\_site\_fract\_y

\_atom\_site\_fract\_z

|   |     |          |          |          |
|---|-----|----------|----------|----------|
| H | H1  | 0.393182 | 0.671245 | 0.467672 |
| H | H2  | 0.432743 | 0.697515 | 0.472164 |
| O | O3  | 0.517224 | 0.026644 | 0.208447 |
| O | O4  | 0.026642 | 0.527685 | 0.713553 |
| O | O5  | 0.517574 | 0.439193 | 0.205593 |
| O | O6  | 0.014970 | 0.931273 | 0.698932 |
| O | O7  | 0.520696 | 0.945645 | 0.784547 |
| O | O8  | 0.010050 | 0.449005 | 0.282004 |
| O | O9  | 0.519100 | 0.536113 | 0.790634 |
| O | O10 | 0.024644 | 0.043909 | 0.292545 |
| O | O11 | 0.400455 | 0.053184 | 0.283833 |
| O | O12 | 0.151549 | 0.549713 | 0.752668 |
| O | O13 | 0.389918 | 0.421019 | 0.236171 |
| O | O14 | 0.135919 | 0.943259 | 0.762553 |
| O | O15 | 0.638241 | 0.921513 | 0.710416 |
| O | O16 | 0.886582 | 0.423497 | 0.238308 |
| O | O17 | 0.646357 | 0.546205 | 0.757167 |
| O | O18 | 0.903570 | 0.033245 | 0.225960 |
| O | O19 | 0.439933 | 0.117175 | 0.124328 |

|   |     |          |          |          |
|---|-----|----------|----------|----------|
| 0 | 020 | 0.095763 | 0.610211 | 0.600245 |
| 0 | 021 | 0.449520 | 0.362677 | 0.084711 |
| 0 | 022 | 0.107597 | 0.857613 | 0.617221 |
| 0 | 023 | 0.599779 | 0.858555 | 0.871207 |
| 0 | 024 | 0.941188 | 0.366792 | 0.395039 |
| 0 | 025 | 0.590415 | 0.613169 | 0.904570 |
| 0 | 026 | 0.931557 | 0.117640 | 0.371731 |
| 0 | 027 | 0.408107 | 0.989163 | 0.112375 |
| 0 | 028 | 0.118425 | 0.479754 | 0.593991 |
| 0 | 029 | 0.433791 | 0.493927 | 0.082573 |
| 0 | 030 | 0.103196 | 0.987896 | 0.582634 |
| 0 | 031 | 0.628602 | 0.988105 | 0.878779 |
| 0 | 032 | 0.913938 | 0.496810 | 0.395486 |
| 0 | 033 | 0.601722 | 0.481672 | 0.917499 |
| 0 | 034 | 0.935084 | 0.986733 | 0.405611 |
| 0 | 035 | 0.335887 | 0.058443 | 0.451255 |
| 0 | 036 | 0.207139 | 0.553724 | 0.926828 |
| 0 | 037 | 0.334987 | 0.429476 | 0.412606 |
| 0 | 038 | 0.201641 | 0.944965 | 0.929578 |
| 0 | 039 | 0.701108 | 0.925652 | 0.541623 |
| 0 | 040 | 0.828256 | 0.419279 | 0.066002 |
| 0 | 041 | 0.700940 | 0.542519 | 0.580747 |
| 0 | 042 | 0.839090 | 0.033325 | 0.056992 |
| 0 | 043 | 0.348888 | 0.942100 | 0.358267 |
| 0 | 044 | 0.188678 | 0.435697 | 0.839284 |
| 0 | 045 | 0.341060 | 0.536464 | 0.296722 |
| 0 | 046 | 0.214804 | 0.045468 | 0.804210 |
| 0 | 047 | 0.690267 | 0.035396 | 0.652901 |
| 0 | 048 | 0.843389 | 0.536440 | 0.156252 |
| 0 | 049 | 0.702260 | 0.434678 | 0.694602 |
| 0 | 050 | 0.827185 | 0.930565 | 0.180731 |
| 0 | 051 | 0.270166 | 0.035565 | 0.286155 |
| 0 | 052 | 0.277789 | 0.517870 | 0.770715 |
| 0 | 053 | 0.260785 | 0.435153 | 0.254391 |
| 0 | 054 | 0.264709 | 0.927635 | 0.758154 |
| 0 | 055 | 0.769105 | 0.936532 | 0.706919 |
| 0 | 056 | 0.758389 | 0.448326 | 0.224997 |
| 0 | 057 | 0.775748 | 0.539555 | 0.739822 |
| 0 | 058 | 0.773495 | 0.046319 | 0.225225 |
| 0 | 059 | 0.306830 | 0.119181 | 0.617445 |
| 0 | 060 | 0.223750 | 0.623211 | 0.090422 |
| 0 | 061 | 0.318916 | 0.356955 | 0.570761 |
| 0 | 062 | 0.212166 | 0.862930 | 0.077948 |
| 0 | 063 | 0.731455 | 0.857731 | 0.381023 |



|   |      |          |          |          |
|---|------|----------|----------|----------|
| 0 | 064  | 0.810916 | 0.348153 | 0.904287 |
| 0 | 065  | 0.715282 | 0.617671 | 0.424670 |
| 0 | 066  | 0.820493 | 0.109571 | 0.901699 |
| 0 | 067  | 0.223273 | 0.029894 | 0.542295 |
| 0 | 068  | 0.316065 | 0.537781 | 0.031771 |
| 0 | 069  | 0.217466 | 0.424455 | 0.498597 |
| 0 | 070  | 0.319623 | 0.923789 | 0.003290 |
| 0 | 071  | 0.816016 | 0.946515 | 0.453367 |
| 0 | 072  | 0.719374 | 0.435387 | 0.959596 |
| 0 | 073  | 0.818807 | 0.553511 | 0.499141 |
| 0 | 074  | 0.718285 | 0.049084 | 0.988874 |
| 0 | 075  | 0.335518 | 0.989909 | 0.619700 |
| 0 | 076  | 0.202979 | 0.492116 | 0.099083 |
| 0 | 077  | 0.315373 | 0.488959 | 0.585193 |
| 0 | 078  | 0.234365 | 0.992412 | 0.107190 |
| 0 | 079  | 0.705909 | 0.987954 | 0.370062 |
| 0 | 080  | 0.833313 | 0.478215 | 0.891128 |
| 0 | 081  | 0.725270 | 0.486209 | 0.407306 |
| 0 | 082  | 0.803534 | 0.978784 | 0.886035 |
| 0 | 083  | 0.133274 | 0.116940 | 0.599139 |
| 0 | 084  | 0.408455 | 0.623471 | 0.086976 |
| 0 | 085  | 0.121168 | 0.348550 | 0.573352 |
| 0 | 086  | 0.415229 | 0.858479 | 0.091825 |
| 0 | 087  | 0.903464 | 0.857289 | 0.393801 |
| 0 | 088  | 0.622845 | 0.350882 | 0.916053 |
| 0 | 089  | 0.915855 | 0.627575 | 0.425430 |
| 0 | 090  | 0.621701 | 0.118986 | 0.908362 |
| 0 | 091  | 0.122253 | 0.060638 | 0.422914 |
| 0 | 092  | 0.418858 | 0.559391 | 0.914158 |
| 0 | 093  | 0.098994 | 0.424265 | 0.418412 |
| 0 | 094  | 0.442177 | 0.935601 | 0.939144 |
| 0 | 095  | 0.918304 | 0.914932 | 0.568011 |
| 0 | 096  | 0.620266 | 0.417251 | 0.086145 |
| 0 | 097  | 0.938473 | 0.546657 | 0.574258 |
| 0 | 098  | 0.595685 | 0.037103 | 0.054451 |
| 0 | 099  | 0.145542 | 0.040026 | 0.231204 |
| 0 | 0100 | 0.401106 | 0.532099 | 0.720411 |
| 0 | 0101 | 0.132149 | 0.424430 | 0.227696 |
| 0 | 0102 | 0.395089 | 0.916715 | 0.756246 |
| 0 | 0103 | 0.893969 | 0.935233 | 0.760021 |
| 0 | 0104 | 0.635201 | 0.442043 | 0.280088 |
| 0 | 0105 | 0.904116 | 0.549073 | 0.765312 |
| 0 | 0106 | 0.643052 | 0.059637 | 0.235940 |
| 0 | 0107 | 0.101191 | 0.941904 | 0.345534 |

|   |      |          |          |          |
|---|------|----------|----------|----------|
| 0 | 0108 | 0.439180 | 0.437320 | 0.846159 |
| 0 | 0109 | 0.104014 | 0.538239 | 0.319311 |
| 0 | 0110 | 0.428127 | 0.037369 | 0.815161 |
| 0 | 0111 | 0.937754 | 0.033397 | 0.646524 |
| 0 | 0112 | 0.599586 | 0.538297 | 0.156348 |
| 0 | 0113 | 0.934659 | 0.434994 | 0.677569 |
| 0 | 0114 | 0.613200 | 0.937868 | 0.180979 |
| 0 | 0115 | 0.231136 | 0.120702 | 0.148493 |
| 0 | 0116 | 0.312763 | 0.613023 | 0.644843 |
| 0 | 0117 | 0.212179 | 0.359755 | 0.110584 |
| 0 | 0118 | 0.325410 | 0.857317 | 0.619527 |
| 0 | 0119 | 0.811885 | 0.851069 | 0.843109 |
| 0 | 0120 | 0.720675 | 0.359469 | 0.360367 |
| 0 | 0121 | 0.825447 | 0.610892 | 0.887446 |
| 0 | 0122 | 0.719182 | 0.120740 | 0.363009 |
| 0 | 0123 | 0.519848 | 0.847883 | 0.212201 |
| 0 | 0124 | 0.026600 | 0.343787 | 0.711802 |
| 0 | 0125 | 0.511098 | 0.628377 | 0.211856 |
| 0 | 0126 | 0.024115 | 0.123622 | 0.708488 |
| 0 | 0127 | 0.522112 | 0.126502 | 0.779170 |
| 0 | 0128 | 0.009285 | 0.627206 | 0.286339 |
| 0 | 0129 | 0.525910 | 0.347209 | 0.782949 |
| 0 | 0130 | 0.013509 | 0.851670 | 0.287858 |
| 0 | 0131 | 0.404533 | 0.818078 | 0.280008 |
| 0 | 0132 | 0.150139 | 0.321480 | 0.760874 |
| 0 | 0133 | 0.393868 | 0.667832 | 0.275654 |
| 0 | 0134 | 0.138557 | 0.152046 | 0.789643 |
| 0 | 0135 | 0.642563 | 0.150382 | 0.720253 |
| 0 | 0136 | 0.886081 | 0.649428 | 0.237019 |
| 0 | 0137 | 0.647691 | 0.318675 | 0.726761 |
| 0 | 0138 | 0.900593 | 0.822107 | 0.203650 |
| 0 | 0139 | 0.457984 | 0.739647 | 0.143452 |
| 0 | 0140 | 0.087034 | 0.233275 | 0.652554 |
| 0 | 0141 | 0.583807 | 0.235591 | 0.843135 |
| 0 | 0142 | 0.950680 | 0.740506 | 0.340072 |
| 0 | 0143 | 0.332727 | 0.807786 | 0.435474 |
| 0 | 0144 | 0.218026 | 0.319764 | 0.923823 |
| 0 | 0145 | 0.335428 | 0.641045 | 0.453676 |
| 0 | 0146 | 0.205935 | 0.132556 | 0.956170 |
| 0 | 0147 | 0.705839 | 0.147551 | 0.553760 |
| 0 | 0148 | 0.819780 | 0.654068 | 0.072977 |
| 0 | 0149 | 0.706159 | 0.339827 | 0.554149 |
| 0 | 0150 | 0.834163 | 0.838525 | 0.036805 |
| 0 | 0151 | 0.265682 | 0.846594 | 0.254582 |

|    |       |          |          |          |
|----|-------|----------|----------|----------|
| 0  | 0152  | 0.277042 | 0.355186 | 0.757059 |
| 0  | 0153  | 0.252996 | 0.650189 | 0.280455 |
| 0  | 0154  | 0.269639 | 0.163995 | 0.794391 |
| 0  | 0155  | 0.771395 | 0.127019 | 0.721467 |
| 0  | 0156  | 0.758427 | 0.619591 | 0.238687 |
| 0  | 0157  | 0.778835 | 0.329074 | 0.714161 |
| 0  | 0158  | 0.769702 | 0.814154 | 0.202296 |
| 0  | 0159  | 0.292884 | 0.732483 | 0.582480 |
| 0  | 0160  | 0.246466 | 0.236543 | 0.066936 |
| 0  | 0161  | 0.741648 | 0.241499 | 0.429590 |
| 0  | 0162  | 0.793590 | 0.735401 | 0.925548 |
| 0  | 0163  | 0.216419 | 0.831657 | 0.516773 |
| 0  | 0164  | 0.327974 | 0.337045 | 0.026723 |
| 0  | 0165  | 0.212510 | 0.634158 | 0.519790 |
| 0  | 0166  | 0.329131 | 0.138064 | 0.020417 |
| 0  | 0167  | 0.824558 | 0.143500 | 0.475991 |
| 0  | 0168  | 0.710228 | 0.637254 | 0.969959 |
| 0  | 0169  | 0.825223 | 0.339245 | 0.475023 |
| 0  | 0170  | 0.712438 | 0.835979 | 0.968386 |
| 0  | 0171  | 0.131797 | 0.734476 | 0.563010 |
| 0  | 0172  | 0.411959 | 0.237286 | 0.062178 |
| 0  | 0173  | 0.908252 | 0.241009 | 0.427665 |
| 0  | 0174  | 0.627642 | 0.737655 | 0.931479 |
| 0  | 0175  | 0.101813 | 0.822802 | 0.424997 |
| 0  | 0176  | 0.428306 | 0.312568 | 0.904857 |
| 0  | 0177  | 0.104079 | 0.653499 | 0.414207 |
| 0  | 0178  | 0.445107 | 0.142229 | 0.933244 |
| 0  | 0179  | 0.940853 | 0.151626 | 0.563098 |
| 0  | 0180  | 0.607361 | 0.661074 | 0.086964 |
| 0  | 0181  | 0.934281 | 0.320515 | 0.578618 |
| 0  | 0182  | 0.599139 | 0.832598 | 0.062100 |
| 0  | 0183  | 0.136259 | 0.837973 | 0.234258 |
| 0  | 0184  | 0.403861 | 0.342809 | 0.717341 |
| 0  | 0185  | 0.128971 | 0.650322 | 0.220185 |
| 0  | 0186  | 0.396975 | 0.156867 | 0.750533 |
| 0  | 0187  | 0.899071 | 0.139062 | 0.750136 |
| 0  | 0188  | 0.632467 | 0.639364 | 0.276908 |
| 0  | 0189  | 0.903646 | 0.322700 | 0.769620 |
| 0  | 0190  | 0.643136 | 0.818030 | 0.247441 |
| 0  | 0191  | 0.210964 | 0.744206 | 0.156147 |
| 0  | 0192  | 0.321276 | 0.245315 | 0.664646 |
| 0  | 0193  | 0.818833 | 0.229184 | 0.826395 |
| 0  | 0194  | 0.720520 | 0.730990 | 0.333315 |
| Al | Al195 | 0.332317 | 0.861277 | 0.327980 |

|    |       |          |          |          |
|----|-------|----------|----------|----------|
| Al | Al196 | 0.326201 | 0.618447 | 0.322434 |
| Si | Si197 | 0.706827 | 0.652296 | 0.317109 |
| Si | Si198 | 0.441735 | 0.046336 | 0.182129 |
| Si | Si199 | 0.098063 | 0.541726 | 0.664630 |
| Si | Si200 | 0.446520 | 0.429392 | 0.153095 |
| Si | Si201 | 0.091213 | 0.929985 | 0.665187 |
| Si | Si202 | 0.596359 | 0.928902 | 0.812130 |
| Si | Si203 | 0.938181 | 0.434117 | 0.328439 |
| Si | Si204 | 0.590449 | 0.543882 | 0.842317 |
| Si | Si205 | 0.948113 | 0.045284 | 0.324131 |
| Si | Si206 | 0.338892 | 0.020830 | 0.344282 |
| Si | Si207 | 0.205894 | 0.514106 | 0.822566 |
| Si | Si208 | 0.331698 | 0.457160 | 0.299380 |
| Si | Si209 | 0.204470 | 0.965287 | 0.813915 |
| Si | Si210 | 0.700075 | 0.955184 | 0.653417 |
| Si | Si211 | 0.829299 | 0.457211 | 0.171920 |
| Si | Si212 | 0.706436 | 0.515370 | 0.693398 |
| Si | Si213 | 0.835900 | 0.010955 | 0.172346 |
| Si | Si214 | 0.300334 | 0.049641 | 0.557603 |
| Si | Si215 | 0.237440 | 0.552322 | 0.038158 |
| Si | Si216 | 0.296341 | 0.425007 | 0.516569 |
| Si | Si217 | 0.241739 | 0.930608 | 0.031041 |
| Si | Si218 | 0.738855 | 0.929163 | 0.435963 |
| Si | Si219 | 0.797737 | 0.420114 | 0.955219 |
| Si | Si220 | 0.740528 | 0.549835 | 0.477337 |
| Si | Si221 | 0.795350 | 0.042928 | 0.957695 |
| Si | Si222 | 0.145834 | 0.049079 | 0.536576 |
| Si | Si223 | 0.393889 | 0.553495 | 0.028661 |
| Si | Si224 | 0.139539 | 0.419156 | 0.521086 |
| Si | Si225 | 0.395852 | 0.927775 | 0.036363 |
| Si | Si226 | 0.893318 | 0.926211 | 0.454962 |
| Si | Si227 | 0.641230 | 0.420910 | 0.970077 |
| Si | Si228 | 0.896542 | 0.555861 | 0.473456 |
| Si | Si229 | 0.641338 | 0.048120 | 0.957466 |
| Si | Si230 | 0.098289 | 0.021428 | 0.323327 |
| Si | Si231 | 0.444215 | 0.516232 | 0.818847 |
| Si | Si232 | 0.086688 | 0.459225 | 0.311378 |
| Si | Si233 | 0.446501 | 0.958773 | 0.823511 |
| Si | Si234 | 0.941538 | 0.953871 | 0.668049 |
| Si | Si235 | 0.592975 | 0.458970 | 0.181372 |
| Si | Si236 | 0.950754 | 0.514303 | 0.682984 |
| Si | Si237 | 0.591959 | 0.015883 | 0.170578 |
| Si | Si238 | 0.220807 | 0.046531 | 0.193861 |
| Si | Si239 | 0.326380 | 0.536827 | 0.680259 |

|    |       |          |          |          |
|----|-------|----------|----------|----------|
| Si | Si240 | 0.202983 | 0.428163 | 0.172848 |
| Si | Si241 | 0.329544 | 0.923731 | 0.688345 |
| Si | Si242 | 0.819477 | 0.925862 | 0.798705 |
| Si | Si243 | 0.710186 | 0.434276 | 0.318342 |
| Si | Si244 | 0.834028 | 0.544182 | 0.821465 |
| Si | Si245 | 0.710845 | 0.053206 | 0.298821 |
| Si | Si246 | 0.449958 | 0.816550 | 0.178912 |
| Si | Si247 | 0.095981 | 0.312090 | 0.674342 |
| Si | Si248 | 0.442585 | 0.663371 | 0.177866 |
| Si | Si249 | 0.095739 | 0.156553 | 0.687711 |
| Si | Si250 | 0.592366 | 0.158021 | 0.812569 |
| Si | Si251 | 0.940922 | 0.661273 | 0.322128 |
| Si | Si252 | 0.595087 | 0.313548 | 0.817131 |
| Si | Si253 | 0.942512 | 0.817602 | 0.306384 |
| Si | Si254 | 0.208825 | 0.358295 | 0.819768 |
| Si | Si255 | 0.206484 | 0.123199 | 0.836459 |
| Si | Si256 | 0.702793 | 0.114797 | 0.662950 |
| Si | Si257 | 0.826975 | 0.614467 | 0.176838 |
| Si | Si258 | 0.708619 | 0.355582 | 0.672197 |
| Si | Si259 | 0.833563 | 0.851658 | 0.155655 |
| Si | Si260 | 0.291271 | 0.808261 | 0.539999 |
| Si | Si261 | 0.251275 | 0.313550 | 0.032518 |
| Si | Si262 | 0.286570 | 0.654774 | 0.550830 |
| Si | Si263 | 0.253050 | 0.157311 | 0.047059 |
| Si | Si264 | 0.748122 | 0.163123 | 0.454983 |
| Si | Si265 | 0.787282 | 0.659228 | 0.963666 |
| Si | Si266 | 0.748477 | 0.319714 | 0.455988 |
| Si | Si267 | 0.788275 | 0.814873 | 0.944315 |
| Si | Si268 | 0.138755 | 0.812135 | 0.530088 |
| Si | Si269 | 0.404241 | 0.312557 | 0.020024 |
| Si | Si270 | 0.135343 | 0.657977 | 0.523970 |
| Si | Si271 | 0.406052 | 0.158730 | 0.035089 |
| Si | Si272 | 0.901551 | 0.163170 | 0.459670 |
| Si | Si273 | 0.634073 | 0.662136 | 0.973259 |
| Si | Si274 | 0.902136 | 0.316910 | 0.468838 |
| Si | Si275 | 0.635208 | 0.816132 | 0.957977 |
| Si | Si276 | 0.089024 | 0.863548 | 0.322254 |
| Si | Si277 | 0.449531 | 0.360098 | 0.812508 |
| Si | Si278 | 0.086994 | 0.617188 | 0.309331 |
| Si | Si279 | 0.447733 | 0.115818 | 0.819687 |
| Si | Si280 | 0.950143 | 0.111947 | 0.667258 |
| Si | Si281 | 0.587894 | 0.616201 | 0.183049 |
| Si | Si282 | 0.949878 | 0.355673 | 0.684408 |
| Si | Si283 | 0.594824 | 0.859464 | 0.174966 |

|    |       |          |          |          |
|----|-------|----------|----------|----------|
| Si | Si284 | 0.207354 | 0.822832 | 0.183035 |
| Si | Si285 | 0.330271 | 0.324579 | 0.679043 |
| Si | Si286 | 0.205032 | 0.666753 | 0.188763 |
| Si | Si287 | 0.324005 | 0.170075 | 0.706483 |
| Si | Si288 | 0.827452 | 0.151159 | 0.799234 |
| Si | Si289 | 0.828423 | 0.307673 | 0.803517 |
| Si | Si290 | 0.716490 | 0.806383 | 0.291354 |
| Zn | Zn291 | 0.405611 | 0.745669 | 0.378917 |

**C<sub>4</sub>H<sub>10</sub>-Phys.Ads-ZnOZn<sup>2+</sup> (Fig. 4/M1)** Total energy = -1931.89802043 eV

data\_

\_audit\_creation\_method 'Materials Studio'

\_cell\_length\_a 20.357621

\_cell\_length\_b 20.050598

\_cell\_length\_c 13.476578

\_cell\_angle\_alpha 90.000000

\_cell\_angle\_beta 90.000000

\_cell\_angle\_gamma 90.000000

\_symmetry\_space\_group\_name\_H-M 'P1'

loop\_

\_atom\_site\_type\_symbol

\_atom\_site\_label

\_atom\_site\_fract\_x

\_atom\_site\_fract\_y

\_atom\_site\_fract\_z

|   |     |          |          |          |
|---|-----|----------|----------|----------|
| H | H1  | 0.618761 | 0.717376 | 0.547733 |
| H | H2  | 0.594255 | 0.781601 | 0.463204 |
| H | H3  | 0.551753 | 0.704804 | 0.466525 |
| H | H4  | 0.488874 | 0.795558 | 0.555796 |
| H | H5  | 0.556453 | 0.809299 | 0.634465 |
| H | H6  | 0.546878 | 0.691913 | 0.698220 |
| H | H7  | 0.478119 | 0.678990 | 0.621578 |
| H | H8  | 0.486420 | 0.782004 | 0.790755 |
| H | H9  | 0.442417 | 0.705825 | 0.794382 |
| H | H10 | 0.417188 | 0.770239 | 0.713324 |
| C | C11 | 0.576546 | 0.742080 | 0.512845 |
| C | C12 | 0.530484 | 0.770557 | 0.592101 |
| C | C13 | 0.504814 | 0.717273 | 0.663874 |
| C | C14 | 0.460168 | 0.745379 | 0.745174 |
| O | O15 | 0.526791 | 0.042652 | 0.215283 |
| O | O16 | 0.017970 | 0.550706 | 0.713749 |
| O | O17 | 0.521773 | 0.451853 | 0.216935 |
| O | O18 | 0.018419 | 0.937933 | 0.699460 |

|   |     |          |          |          |
|---|-----|----------|----------|----------|
| 0 | 019 | 0.517102 | 0.948500 | 0.794236 |
| 0 | 020 | 0.018493 | 0.456991 | 0.294934 |
| 0 | 021 | 0.514025 | 0.538626 | 0.792886 |
| 0 | 022 | 0.025954 | 0.047005 | 0.292405 |
| 0 | 023 | 0.410546 | 0.053669 | 0.296197 |
| 0 | 024 | 0.132850 | 0.551377 | 0.797823 |
| 0 | 025 | 0.402679 | 0.432936 | 0.288843 |
| 0 | 026 | 0.131855 | 0.938189 | 0.795224 |
| 0 | 027 | 0.626889 | 0.949442 | 0.693977 |
| 0 | 028 | 0.899010 | 0.437258 | 0.226381 |
| 0 | 029 | 0.635041 | 0.529870 | 0.734006 |
| 0 | 030 | 0.913336 | 0.050933 | 0.202754 |
| 0 | 031 | 0.438130 | 0.124233 | 0.135204 |
| 0 | 032 | 0.112373 | 0.629550 | 0.643312 |
| 0 | 033 | 0.443036 | 0.364204 | 0.131126 |
| 0 | 034 | 0.116394 | 0.865926 | 0.633194 |
| 0 | 035 | 0.615815 | 0.868876 | 0.847634 |
| 0 | 036 | 0.937372 | 0.378426 | 0.392635 |
| 0 | 037 | 0.600928 | 0.621369 | 0.868914 |
| 0 | 038 | 0.934022 | 0.128597 | 0.361566 |
| 0 | 039 | 0.423640 | 0.993244 | 0.121305 |
| 0 | 040 | 0.120279 | 0.499046 | 0.617278 |
| 0 | 041 | 0.418213 | 0.492648 | 0.114160 |
| 0 | 042 | 0.123244 | 0.997632 | 0.620774 |
| 0 | 043 | 0.626208 | 0.999770 | 0.875841 |
| 0 | 044 | 0.914744 | 0.509520 | 0.388466 |
| 0 | 045 | 0.603396 | 0.492875 | 0.918148 |
| 0 | 046 | 0.920437 | 0.998480 | 0.383473 |
| 0 | 047 | 0.342049 | 0.038822 | 0.460312 |
| 0 | 048 | 0.199521 | 0.542690 | 0.962197 |
| 0 | 049 | 0.340915 | 0.454856 | 0.458948 |
| 0 | 050 | 0.196710 | 0.953858 | 0.961844 |
| 0 | 051 | 0.694011 | 0.953224 | 0.527679 |
| 0 | 052 | 0.831852 | 0.424941 | 0.060725 |
| 0 | 053 | 0.705906 | 0.554256 | 0.576185 |
| 0 | 054 | 0.842222 | 0.052923 | 0.039214 |
| 0 | 055 | 0.333253 | 0.948357 | 0.314860 |
| 0 | 056 | 0.214204 | 0.449565 | 0.820750 |
| 0 | 057 | 0.336723 | 0.545032 | 0.312245 |
| 0 | 058 | 0.206519 | 0.045334 | 0.817637 |
| 0 | 059 | 0.712922 | 0.047984 | 0.666962 |
| 0 | 060 | 0.845136 | 0.544401 | 0.141887 |
| 0 | 061 | 0.725051 | 0.441809 | 0.674909 |
| 0 | 062 | 0.837490 | 0.946726 | 0.157318 |

|   |      |          |          |          |
|---|------|----------|----------|----------|
| 0 | 063  | 0.280682 | 0.066491 | 0.291169 |
| 0 | 064  | 0.262777 | 0.568813 | 0.793912 |
| 0 | 065  | 0.271543 | 0.431341 | 0.297598 |
| 0 | 066  | 0.263001 | 0.928458 | 0.795815 |
| 0 | 067  | 0.756085 | 0.925395 | 0.694521 |
| 0 | 068  | 0.769061 | 0.454133 | 0.226858 |
| 0 | 069  | 0.761385 | 0.556042 | 0.754540 |
| 0 | 070  | 0.785056 | 0.061983 | 0.213041 |
| 0 | 071  | 0.321143 | 0.120336 | 0.610137 |
| 0 | 072  | 0.215914 | 0.620344 | 0.117678 |
| 0 | 073  | 0.317456 | 0.373918 | 0.609189 |
| 0 | 074  | 0.226821 | 0.873301 | 0.110661 |
| 0 | 075  | 0.727234 | 0.861779 | 0.393495 |
| 0 | 076  | 0.805460 | 0.353141 | 0.900964 |
| 0 | 077  | 0.706127 | 0.619858 | 0.410765 |
| 0 | 078  | 0.809842 | 0.125900 | 0.887876 |
| 0 | 079  | 0.221115 | 0.055755 | 0.525834 |
| 0 | 080  | 0.317968 | 0.557311 | 0.037244 |
| 0 | 081  | 0.219194 | 0.440546 | 0.523657 |
| 0 | 082  | 0.317953 | 0.950669 | 0.027503 |
| 0 | 083  | 0.817686 | 0.942738 | 0.468173 |
| 0 | 084  | 0.718893 | 0.442712 | 0.965755 |
| 0 | 085  | 0.819527 | 0.573621 | 0.484424 |
| 0 | 086  | 0.715862 | 0.062471 | 0.987569 |
| 0 | 087  | 0.308138 | 0.990564 | 0.635760 |
| 0 | 088  | 0.226268 | 0.489545 | 0.135770 |
| 0 | 089  | 0.305903 | 0.504316 | 0.633730 |
| 0 | 090  | 0.223698 | 0.003225 | 0.139659 |
| 0 | 091  | 0.723697 | 0.989597 | 0.345752 |
| 0 | 092  | 0.829878 | 0.482454 | 0.883400 |
| 0 | 093  | 0.732935 | 0.489984 | 0.408765 |
| 0 | 094  | 0.796934 | 0.993263 | 0.877211 |
| 0 | 095  | 0.128039 | 0.130169 | 0.607902 |
| 0 | 096  | 0.419958 | 0.625371 | 0.106191 |
| 0 | 097  | 0.124578 | 0.366858 | 0.602156 |
| 0 | 098  | 0.404169 | 0.863149 | 0.097509 |
| 0 | 099  | 0.905446 | 0.866257 | 0.377036 |
| 0 | 0100 | 0.622132 | 0.360911 | 0.912927 |
| 0 | 0101 | 0.917500 | 0.641674 | 0.404158 |
| 0 | 0102 | 0.622530 | 0.131547 | 0.897555 |
| 0 | 0103 | 0.100915 | 0.058463 | 0.450365 |
| 0 | 0104 | 0.432780 | 0.556152 | 0.943854 |
| 0 | 0105 | 0.100233 | 0.440721 | 0.444400 |
| 0 | 0106 | 0.435286 | 0.938670 | 0.944066 |



|   |      |          |          |          |
|---|------|----------|----------|----------|
| 0 | 0107 | 0.936370 | 0.925453 | 0.546387 |
| 0 | 0108 | 0.616007 | 0.425553 | 0.084844 |
| 0 | 0109 | 0.938115 | 0.568595 | 0.562567 |
| 0 | 0110 | 0.592210 | 0.052991 | 0.047523 |
| 0 | 0111 | 0.151493 | 0.069977 | 0.269760 |
| 0 | 0112 | 0.390490 | 0.560078 | 0.757828 |
| 0 | 0113 | 0.143460 | 0.427222 | 0.258573 |
| 0 | 0114 | 0.391308 | 0.929950 | 0.758563 |
| 0 | 0115 | 0.892271 | 0.951010 | 0.728964 |
| 0 | 0116 | 0.643746 | 0.456652 | 0.273650 |
| 0 | 0117 | 0.891368 | 0.551364 | 0.745385 |
| 0 | 0118 | 0.654187 | 0.061904 | 0.220096 |
| 0 | 0119 | 0.113593 | 0.952070 | 0.334913 |
| 0 | 0120 | 0.426064 | 0.445056 | 0.838293 |
| 0 | 0121 | 0.112975 | 0.546126 | 0.325014 |
| 0 | 0122 | 0.431049 | 0.045980 | 0.828472 |
| 0 | 0123 | 0.957789 | 0.043220 | 0.625126 |
| 0 | 0124 | 0.599913 | 0.548761 | 0.149764 |
| 0 | 0125 | 0.945444 | 0.450365 | 0.644162 |
| 0 | 0126 | 0.609432 | 0.945457 | 0.159294 |
| 0 | 0127 | 0.226351 | 0.135932 | 0.148055 |
| 0 | 0128 | 0.316667 | 0.635998 | 0.647592 |
| 0 | 0129 | 0.225611 | 0.357567 | 0.150709 |
| 0 | 0130 | 0.312413 | 0.858672 | 0.647407 |
| 0 | 0131 | 0.810606 | 0.852888 | 0.826716 |
| 0 | 0132 | 0.720277 | 0.365532 | 0.354769 |
| 0 | 0133 | 0.832215 | 0.614743 | 0.891779 |
| 0 | 0134 | 0.721914 | 0.124059 | 0.354343 |
| 0 | 0135 | 0.517984 | 0.855098 | 0.194520 |
| 0 | 0136 | 0.019305 | 0.352305 | 0.717889 |
| 0 | 0137 | 0.527027 | 0.649775 | 0.215955 |
| 0 | 0138 | 0.016660 | 0.146886 | 0.711503 |
| 0 | 0139 | 0.517074 | 0.140948 | 0.780565 |
| 0 | 0140 | 0.024136 | 0.640640 | 0.287811 |
| 0 | 0141 | 0.520943 | 0.358876 | 0.787651 |
| 0 | 0142 | 0.021560 | 0.864484 | 0.284476 |
| 0 | 0143 | 0.407165 | 0.839925 | 0.291700 |
| 0 | 0144 | 0.137288 | 0.343761 | 0.796171 |
| 0 | 0145 | 0.410535 | 0.654420 | 0.297903 |
| 0 | 0146 | 0.131164 | 0.153772 | 0.801386 |
| 0 | 0147 | 0.634442 | 0.152634 | 0.703878 |
| 0 | 0148 | 0.908030 | 0.651999 | 0.208046 |
| 0 | 0149 | 0.640010 | 0.345690 | 0.717600 |
| 0 | 0150 | 0.913710 | 0.840985 | 0.182845 |

|   |      |          |          |          |
|---|------|----------|----------|----------|
| 0 | 0151 | 0.444699 | 0.746806 | 0.163977 |
| 0 | 0152 | 0.096107 | 0.248830 | 0.673348 |
| 0 | 0153 | 0.589111 | 0.247889 | 0.825346 |
| 0 | 0154 | 0.955417 | 0.752194 | 0.316625 |
| 0 | 0155 | 0.339423 | 0.855731 | 0.455125 |
| 0 | 0156 | 0.210403 | 0.354731 | 0.956651 |
| 0 | 0157 | 0.336081 | 0.636470 | 0.454280 |
| 0 | 0158 | 0.209243 | 0.139659 | 0.954653 |
| 0 | 0159 | 0.704545 | 0.149433 | 0.541703 |
| 0 | 0160 | 0.816743 | 0.664693 | 0.072822 |
| 0 | 0161 | 0.703699 | 0.341235 | 0.548277 |
| 0 | 0162 | 0.840732 | 0.849966 | 0.020756 |
| 0 | 0163 | 0.276261 | 0.832842 | 0.285310 |
| 0 | 0164 | 0.267626 | 0.333182 | 0.782870 |
| 0 | 0165 | 0.281110 | 0.661428 | 0.278679 |
| 0 | 0166 | 0.260098 | 0.161154 | 0.775462 |
| 0 | 0167 | 0.764233 | 0.164920 | 0.713595 |
| 0 | 0168 | 0.783469 | 0.631682 | 0.256155 |
| 0 | 0169 | 0.769214 | 0.322362 | 0.715873 |
| 0 | 0170 | 0.783855 | 0.829722 | 0.196798 |
| 0 | 0171 | 0.301771 | 0.746625 | 0.549550 |
| 0 | 0172 | 0.248202 | 0.246720 | 0.053024 |
| 0 | 0173 | 0.740775 | 0.246302 | 0.420458 |
| 0 | 0174 | 0.800990 | 0.741074 | 0.917493 |
| 0 | 0175 | 0.216602 | 0.843810 | 0.512870 |
| 0 | 0176 | 0.330602 | 0.347975 | 0.033227 |
| 0 | 0177 | 0.215408 | 0.647488 | 0.523043 |
| 0 | 0178 | 0.329725 | 0.144132 | 0.027383 |
| 0 | 0179 | 0.825917 | 0.151100 | 0.467285 |
| 0 | 0180 | 0.712989 | 0.646932 | 0.958345 |
| 0 | 0181 | 0.823006 | 0.344796 | 0.473012 |
| 0 | 0182 | 0.716619 | 0.838062 | 0.964696 |
| 0 | 0183 | 0.133524 | 0.746651 | 0.565034 |
| 0 | 0184 | 0.409409 | 0.244430 | 0.074371 |
| 0 | 0185 | 0.908021 | 0.251007 | 0.418727 |
| 0 | 0186 | 0.630190 | 0.746188 | 0.910027 |
| 0 | 0187 | 0.096273 | 0.841749 | 0.440297 |
| 0 | 0188 | 0.443585 | 0.332984 | 0.938764 |
| 0 | 0189 | 0.094687 | 0.646097 | 0.450673 |
| 0 | 0190 | 0.446559 | 0.152558 | 0.943171 |
| 0 | 0191 | 0.941050 | 0.163294 | 0.554422 |
| 0 | 0192 | 0.601355 | 0.664301 | 0.056687 |
| 0 | 0193 | 0.933387 | 0.327946 | 0.574218 |
| 0 | 0194 | 0.595480 | 0.842166 | 0.038616 |

|    |       |          |          |          |
|----|-------|----------|----------|----------|
| O  | O195  | 0.147287 | 0.836176 | 0.257978 |
| O  | O196  | 0.396328 | 0.330904 | 0.753685 |
| O  | O197  | 0.151368 | 0.666874 | 0.275598 |
| O  | O198  | 0.389647 | 0.163242 | 0.766189 |
| O  | O199  | 0.889023 | 0.129778 | 0.730939 |
| O  | O200  | 0.655875 | 0.654383 | 0.234379 |
| O  | O201  | 0.892778 | 0.357625 | 0.757090 |
| O  | O202  | 0.643176 | 0.825266 | 0.222269 |
| O  | O203  | 0.220036 | 0.747838 | 0.162837 |
| O  | O204  | 0.319997 | 0.246988 | 0.657815 |
| O  | O205  | 0.846079 | 0.241182 | 0.815244 |
| O  | O206  | 0.727185 | 0.739200 | 0.340735 |
| O  | O207  | 0.757891 | 0.758072 | 0.606504 |
| Al | Al208 | 0.818848 | 0.939197 | 0.786499 |
| Al | Al209 | 0.719022 | 0.818580 | 0.276268 |
| Si | Si210 | 0.741232 | 0.937849 | 0.433161 |
| Si | Si211 | 0.717679 | 0.660680 | 0.308439 |
| Si | Si212 | 0.449667 | 0.053581 | 0.191201 |
| Si | Si213 | 0.095779 | 0.557499 | 0.691995 |
| Si | Si214 | 0.446300 | 0.435484 | 0.187845 |
| Si | Si215 | 0.097034 | 0.935395 | 0.686759 |
| Si | Si216 | 0.595811 | 0.942117 | 0.804936 |
| Si | Si217 | 0.942501 | 0.445655 | 0.326592 |
| Si | Si218 | 0.589252 | 0.545865 | 0.829190 |
| Si | Si219 | 0.948148 | 0.056542 | 0.310610 |
| Si | Si220 | 0.341589 | 0.026919 | 0.341514 |
| Si | Si221 | 0.202469 | 0.528084 | 0.844457 |
| Si | Si222 | 0.338003 | 0.465982 | 0.339816 |
| Si | Si223 | 0.199595 | 0.966387 | 0.843136 |
| Si | Si224 | 0.697114 | 0.969931 | 0.645529 |
| Si | Si225 | 0.836417 | 0.465155 | 0.164779 |
| Si | Si226 | 0.706813 | 0.520346 | 0.684984 |
| Si | Si227 | 0.844728 | 0.027200 | 0.152452 |
| Si | Si228 | 0.297832 | 0.051373 | 0.558582 |
| Si | Si229 | 0.240434 | 0.552493 | 0.064102 |
| Si | Si230 | 0.295858 | 0.443250 | 0.556946 |
| Si | Si231 | 0.241372 | 0.945193 | 0.060667 |
| Si | Si232 | 0.796513 | 0.425641 | 0.952832 |
| Si | Si233 | 0.741806 | 0.558885 | 0.469775 |
| Si | Si234 | 0.791529 | 0.057575 | 0.946343 |
| Si | Si235 | 0.143393 | 0.060365 | 0.551883 |
| Si | Si236 | 0.396920 | 0.557710 | 0.050973 |
| Si | Si237 | 0.141230 | 0.436841 | 0.547330 |
| Si | Si238 | 0.395172 | 0.936435 | 0.047718 |

|    |       |          |          |          |
|----|-------|----------|----------|----------|
| Si | Si239 | 0.895794 | 0.933382 | 0.443593 |
| Si | Si240 | 0.640227 | 0.429927 | 0.970070 |
| Si | Si241 | 0.897466 | 0.572683 | 0.459577 |
| Si | Si242 | 0.639845 | 0.061489 | 0.951746 |
| Si | Si243 | 0.097900 | 0.031565 | 0.336891 |
| Si | Si244 | 0.440667 | 0.524623 | 0.833682 |
| Si | Si245 | 0.093779 | 0.467502 | 0.330968 |
| Si | Si246 | 0.443564 | 0.966040 | 0.831450 |
| Si | Si247 | 0.949822 | 0.964262 | 0.652005 |
| Si | Si248 | 0.595305 | 0.470483 | 0.180721 |
| Si | Si249 | 0.947660 | 0.529862 | 0.667416 |
| Si | Si250 | 0.595634 | 0.024953 | 0.160869 |
| Si | Si251 | 0.220783 | 0.067897 | 0.211793 |
| Si | Si252 | 0.318776 | 0.566375 | 0.708120 |
| Si | Si253 | 0.216550 | 0.427080 | 0.210473 |
| Si | Si254 | 0.318759 | 0.927679 | 0.709455 |
| Si | Si255 | 0.716704 | 0.441730 | 0.315359 |
| Si | Si256 | 0.828729 | 0.550567 | 0.818572 |
| Si | Si257 | 0.721184 | 0.059240 | 0.283436 |
| Si | Si258 | 0.444242 | 0.826066 | 0.186640 |
| Si | Si259 | 0.094137 | 0.327718 | 0.697426 |
| Si | Si260 | 0.450618 | 0.669359 | 0.195862 |
| Si | Si261 | 0.092533 | 0.169997 | 0.698368 |
| Si | Si262 | 0.590751 | 0.168709 | 0.801943 |
| Si | Si263 | 0.951553 | 0.672124 | 0.304521 |
| Si | Si264 | 0.593112 | 0.327824 | 0.811195 |
| Si | Si265 | 0.949166 | 0.830744 | 0.289737 |
| Si | Si266 | 0.339028 | 0.869120 | 0.336438 |
| Si | Si267 | 0.207173 | 0.370043 | 0.838922 |
| Si | Si268 | 0.340841 | 0.624285 | 0.335864 |
| Si | Si269 | 0.201853 | 0.124902 | 0.837353 |
| Si | Si270 | 0.703876 | 0.128534 | 0.657333 |
| Si | Si271 | 0.838547 | 0.622765 | 0.169551 |
| Si | Si272 | 0.709160 | 0.362686 | 0.664174 |
| Si | Si273 | 0.842712 | 0.866538 | 0.140255 |
| Si | Si274 | 0.292390 | 0.826206 | 0.541813 |
| Si | Si275 | 0.253842 | 0.326569 | 0.048380 |
| Si | Si276 | 0.292055 | 0.667122 | 0.543511 |
| Si | Si277 | 0.253661 | 0.166900 | 0.045576 |
| Si | Si278 | 0.748815 | 0.167914 | 0.445825 |
| Si | Si279 | 0.790592 | 0.666155 | 0.959484 |
| Si | Si280 | 0.746989 | 0.324131 | 0.449922 |
| Si | Si281 | 0.792569 | 0.820552 | 0.935933 |
| Si | Si282 | 0.140462 | 0.824702 | 0.537362 |

|    |       |          |          |          |
|----|-------|----------|----------|----------|
| Si | Si283 | 0.406476 | 0.322449 | 0.044205 |
| Si | Si284 | 0.139128 | 0.667540 | 0.545430 |
| Si | Si285 | 0.406085 | 0.166192 | 0.044930 |
| Si | Si286 | 0.902475 | 0.172818 | 0.450097 |
| Si | Si287 | 0.636354 | 0.669699 | 0.948664 |
| Si | Si288 | 0.900593 | 0.325621 | 0.464287 |
| Si | Si289 | 0.638890 | 0.824123 | 0.941892 |
| Si | Si290 | 0.094950 | 0.873549 | 0.329136 |
| Si | Si291 | 0.446591 | 0.367054 | 0.829447 |
| Si | Si292 | 0.095883 | 0.624869 | 0.334324 |
| Si | Si293 | 0.445860 | 0.125450 | 0.829488 |
| Si | Si294 | 0.950601 | 0.120796 | 0.656142 |
| Si | Si295 | 0.595983 | 0.628919 | 0.164598 |
| Si | Si296 | 0.947860 | 0.371814 | 0.673356 |
| Si | Si297 | 0.592608 | 0.866062 | 0.154978 |
| Si | Si298 | 0.217617 | 0.823809 | 0.204372 |
| Si | Si299 | 0.325239 | 0.322380 | 0.700775 |
| Si | Si300 | 0.217276 | 0.673077 | 0.208420 |
| Si | Si301 | 0.322662 | 0.171813 | 0.702432 |
| Si | Si302 | 0.827632 | 0.164846 | 0.787005 |
| Si | Si303 | 0.828259 | 0.318721 | 0.797179 |
| Zn | Zn304 | 0.772022 | 0.821289 | 0.698425 |
| Zn | Zn305 | 0.739632 | 0.775757 | 0.478302 |

**TS-C<sub>4</sub>H<sub>10</sub>-dehydro-ZnOZn<sup>2+</sup> (Fig. 4/TS1)** Total energy = -1930.31485715 eV

data\_

\_audit\_creation\_method 'Materials Studio'

\_cell\_length\_a 20.357621

\_cell\_length\_b 20.050598

\_cell\_length\_c 13.476578

\_cell\_angle\_alpha 90.000000

\_cell\_angle\_beta 90.000000

\_cell\_angle\_gamma 90.000000

\_symmetry\_space\_group\_name\_H-M 'P1'

loop\_

\_atom\_site\_type\_symbol

\_atom\_site\_label

\_atom\_site\_fract\_x

\_atom\_site\_fract\_y

\_atom\_site\_fract\_z

|   |    |          |          |          |
|---|----|----------|----------|----------|
| H | H1 | 0.622872 | 0.673725 | 0.559130 |
| H | H2 | 0.593045 | 0.735930 | 0.480443 |
| H | H3 | 0.569546 | 0.811764 | 0.623583 |

|   |     |          |          |          |
|---|-----|----------|----------|----------|
| H | H4  | 0.598483 | 0.751091 | 0.706570 |
| H | H5  | 0.510352 | 0.672199 | 0.649483 |
| H | H6  | 0.479481 | 0.734607 | 0.570276 |
| H | H7  | 0.489226 | 0.746218 | 0.798001 |
| H | H8  | 0.416156 | 0.731930 | 0.729965 |
| H | H9  | 0.458053 | 0.808785 | 0.718215 |
| H | H10 | 0.679429 | 0.747291 | 0.595801 |
| C | C11 | 0.617889 | 0.727919 | 0.552392 |
| C | C12 | 0.574235 | 0.757667 | 0.634669 |
| C | C13 | 0.505491 | 0.726449 | 0.640773 |
| C | C14 | 0.464832 | 0.754924 | 0.726592 |
| O | O15 | 0.524083 | 0.044104 | 0.213636 |
| O | O16 | 0.017073 | 0.555069 | 0.708716 |
| O | O17 | 0.524672 | 0.445985 | 0.214177 |
| O | O18 | 0.017882 | 0.938102 | 0.694860 |
| O | O19 | 0.517073 | 0.947260 | 0.793217 |
| O | O20 | 0.022628 | 0.456139 | 0.291924 |
| O | O21 | 0.514656 | 0.542508 | 0.787027 |
| O | O22 | 0.022812 | 0.040020 | 0.293624 |
| O | O23 | 0.406712 | 0.058605 | 0.292308 |
| O | O24 | 0.131000 | 0.552145 | 0.797717 |
| O | O25 | 0.406529 | 0.433576 | 0.292615 |
| O | O26 | 0.131097 | 0.939062 | 0.791436 |
| O | O27 | 0.626117 | 0.956294 | 0.692570 |
| O | O28 | 0.905319 | 0.440511 | 0.214502 |
| O | O29 | 0.633316 | 0.531817 | 0.718086 |
| O | O30 | 0.911184 | 0.055911 | 0.202660 |
| O | O31 | 0.438075 | 0.127735 | 0.132278 |
| O | O32 | 0.115976 | 0.628014 | 0.638714 |
| O | O33 | 0.438808 | 0.363918 | 0.131813 |
| O | O34 | 0.116443 | 0.865442 | 0.630749 |
| O | O35 | 0.620228 | 0.871986 | 0.842132 |
| O | O36 | 0.937676 | 0.376471 | 0.379431 |
| O | O37 | 0.605805 | 0.624853 | 0.853406 |
| O | O38 | 0.936955 | 0.126661 | 0.366489 |
| O | O39 | 0.420389 | 0.996909 | 0.118810 |
| O | O40 | 0.118194 | 0.496726 | 0.619205 |
| O | O41 | 0.420375 | 0.493775 | 0.118996 |
| O | O42 | 0.122564 | 0.997003 | 0.615651 |
| O | O43 | 0.623641 | 0.002371 | 0.877467 |
| O | O44 | 0.917261 | 0.507961 | 0.382155 |
| O | O45 | 0.608479 | 0.496857 | 0.905740 |
| O | O46 | 0.911877 | 0.997669 | 0.378907 |
| O | O47 | 0.341150 | 0.040139 | 0.458076 |

|   |     |          |          |          |
|---|-----|----------|----------|----------|
| 0 | 048 | 0.201164 | 0.543431 | 0.960470 |
| 0 | 049 | 0.342394 | 0.456072 | 0.459440 |
| 0 | 050 | 0.195356 | 0.953867 | 0.958713 |
| 0 | 051 | 0.692169 | 0.953168 | 0.525398 |
| 0 | 052 | 0.836886 | 0.426801 | 0.050011 |
| 0 | 053 | 0.707254 | 0.554515 | 0.562785 |
| 0 | 054 | 0.842099 | 0.057442 | 0.036955 |
| 0 | 055 | 0.334100 | 0.950322 | 0.311750 |
| 0 | 056 | 0.212966 | 0.450482 | 0.818649 |
| 0 | 057 | 0.338509 | 0.545305 | 0.311705 |
| 0 | 058 | 0.206081 | 0.045827 | 0.815135 |
| 0 | 059 | 0.713919 | 0.051946 | 0.656962 |
| 0 | 060 | 0.845113 | 0.545552 | 0.134506 |
| 0 | 061 | 0.722553 | 0.441739 | 0.662528 |
| 0 | 062 | 0.839897 | 0.949661 | 0.151683 |
| 0 | 063 | 0.275746 | 0.066021 | 0.292007 |
| 0 | 064 | 0.260324 | 0.570214 | 0.789057 |
| 0 | 065 | 0.275309 | 0.430942 | 0.295565 |
| 0 | 066 | 0.262292 | 0.928987 | 0.793056 |
| 0 | 067 | 0.754849 | 0.929920 | 0.693259 |
| 0 | 068 | 0.774847 | 0.449955 | 0.218415 |
| 0 | 069 | 0.759548 | 0.555694 | 0.743377 |
| 0 | 070 | 0.782001 | 0.062128 | 0.208349 |
| 0 | 071 | 0.320527 | 0.121279 | 0.608273 |
| 0 | 072 | 0.222743 | 0.621210 | 0.114211 |
| 0 | 073 | 0.319113 | 0.374754 | 0.609094 |
| 0 | 074 | 0.226358 | 0.874173 | 0.108309 |
| 0 | 075 | 0.717706 | 0.860152 | 0.390745 |
| 0 | 076 | 0.805533 | 0.356497 | 0.890756 |
| 0 | 077 | 0.707306 | 0.617094 | 0.394841 |
| 0 | 078 | 0.807806 | 0.132720 | 0.888604 |
| 0 | 079 | 0.220640 | 0.056657 | 0.524698 |
| 0 | 080 | 0.321619 | 0.554508 | 0.030352 |
| 0 | 081 | 0.221498 | 0.445003 | 0.528177 |
| 0 | 082 | 0.316829 | 0.951201 | 0.023060 |
| 0 | 083 | 0.815144 | 0.933406 | 0.466829 |
| 0 | 084 | 0.720997 | 0.444863 | 0.963843 |
| 0 | 085 | 0.821215 | 0.573928 | 0.472768 |
| 0 | 086 | 0.715502 | 0.064731 | 0.985725 |
| 0 | 087 | 0.308399 | 0.991328 | 0.633745 |
| 0 | 088 | 0.229928 | 0.490412 | 0.134132 |
| 0 | 089 | 0.312920 | 0.504952 | 0.636212 |
| 0 | 090 | 0.223243 | 0.004320 | 0.135616 |
| 0 | 091 | 0.726360 | 0.987091 | 0.343192 |

|   |      |          |          |          |
|---|------|----------|----------|----------|
| 0 | 092  | 0.829417 | 0.486189 | 0.874977 |
| 0 | 093  | 0.736294 | 0.488211 | 0.397803 |
| 0 | 094  | 0.798304 | 0.000193 | 0.871917 |
| 0 | 095  | 0.125868 | 0.129724 | 0.605005 |
| 0 | 096  | 0.420596 | 0.625805 | 0.103214 |
| 0 | 097  | 0.127562 | 0.365683 | 0.597584 |
| 0 | 098  | 0.404014 | 0.866087 | 0.096236 |
| 0 | 099  | 0.908042 | 0.864536 | 0.374486 |
| 0 | 0100 | 0.625770 | 0.364765 | 0.899754 |
| 0 | 0101 | 0.919916 | 0.640771 | 0.392948 |
| 0 | 0102 | 0.622543 | 0.134393 | 0.895624 |
| 0 | 0103 | 0.101534 | 0.058919 | 0.445565 |
| 0 | 0104 | 0.439743 | 0.551962 | 0.946231 |
| 0 | 0105 | 0.104422 | 0.442062 | 0.442171 |
| 0 | 0106 | 0.435158 | 0.941605 | 0.942787 |
| 0 | 0107 | 0.935746 | 0.927076 | 0.542226 |
| 0 | 0108 | 0.613585 | 0.427290 | 0.072052 |
| 0 | 0109 | 0.939540 | 0.570786 | 0.553536 |
| 0 | 0110 | 0.592288 | 0.058533 | 0.048500 |
| 0 | 0111 | 0.146972 | 0.069892 | 0.261562 |
| 0 | 0112 | 0.389456 | 0.567198 | 0.766136 |
| 0 | 0113 | 0.147497 | 0.427132 | 0.256584 |
| 0 | 0114 | 0.390903 | 0.930270 | 0.757567 |
| 0 | 0115 | 0.891935 | 0.951534 | 0.725304 |
| 0 | 0116 | 0.648710 | 0.460062 | 0.257675 |
| 0 | 0117 | 0.889612 | 0.552887 | 0.733432 |
| 0 | 0118 | 0.651589 | 0.059259 | 0.223960 |
| 0 | 0119 | 0.116701 | 0.951236 | 0.332758 |
| 0 | 0120 | 0.426689 | 0.447743 | 0.826573 |
| 0 | 0121 | 0.116117 | 0.546271 | 0.320763 |
| 0 | 0122 | 0.432169 | 0.046602 | 0.822183 |
| 0 | 0123 | 0.957329 | 0.044510 | 0.622890 |
| 0 | 0124 | 0.591595 | 0.548520 | 0.140084 |
| 0 | 0125 | 0.948213 | 0.453061 | 0.635622 |
| 0 | 0126 | 0.604666 | 0.946884 | 0.151392 |
| 0 | 0127 | 0.226412 | 0.136880 | 0.146128 |
| 0 | 0128 | 0.317571 | 0.637426 | 0.645792 |
| 0 | 0129 | 0.229320 | 0.358398 | 0.147318 |
| 0 | 0130 | 0.312721 | 0.859330 | 0.645487 |
| 0 | 0131 | 0.808172 | 0.857943 | 0.826686 |
| 0 | 0132 | 0.718628 | 0.364856 | 0.343986 |
| 0 | 0133 | 0.830312 | 0.618721 | 0.876596 |
| 0 | 0134 | 0.721102 | 0.120914 | 0.355648 |
| 0 | 0135 | 0.518276 | 0.852667 | 0.191301 |



|   |      |          |          |          |
|---|------|----------|----------|----------|
| 0 | 0136 | 0.019374 | 0.353272 | 0.708731 |
| 0 | 0137 | 0.529078 | 0.655655 | 0.208029 |
| 0 | 0138 | 0.016054 | 0.147499 | 0.711615 |
| 0 | 0139 | 0.517707 | 0.142360 | 0.777127 |
| 0 | 0140 | 0.028188 | 0.641222 | 0.280983 |
| 0 | 0141 | 0.521210 | 0.360577 | 0.780872 |
| 0 | 0142 | 0.023521 | 0.865134 | 0.281215 |
| 0 | 0143 | 0.407925 | 0.841908 | 0.290233 |
| 0 | 0144 | 0.135824 | 0.344832 | 0.792500 |
| 0 | 0145 | 0.414338 | 0.653265 | 0.295833 |
| 0 | 0146 | 0.131516 | 0.154509 | 0.798369 |
| 0 | 0147 | 0.635068 | 0.154609 | 0.701776 |
| 0 | 0148 | 0.912805 | 0.651155 | 0.197148 |
| 0 | 0149 | 0.639156 | 0.343916 | 0.705411 |
| 0 | 0150 | 0.915811 | 0.843808 | 0.179010 |
| 0 | 0151 | 0.440234 | 0.747921 | 0.160843 |
| 0 | 0152 | 0.095826 | 0.248847 | 0.670101 |
| 0 | 0153 | 0.588752 | 0.250076 | 0.821520 |
| 0 | 0154 | 0.958092 | 0.751916 | 0.307386 |
| 0 | 0155 | 0.339597 | 0.858387 | 0.453179 |
| 0 | 0156 | 0.208225 | 0.354980 | 0.953984 |
| 0 | 0157 | 0.339636 | 0.637114 | 0.452934 |
| 0 | 0158 | 0.208526 | 0.139764 | 0.952935 |
| 0 | 0159 | 0.704416 | 0.157414 | 0.539261 |
| 0 | 0160 | 0.822443 | 0.665400 | 0.060705 |
| 0 | 0161 | 0.704316 | 0.339517 | 0.537615 |
| 0 | 0162 | 0.840736 | 0.850772 | 0.019707 |
| 0 | 0163 | 0.277210 | 0.834794 | 0.282888 |
| 0 | 0164 | 0.266265 | 0.334131 | 0.780607 |
| 0 | 0165 | 0.285230 | 0.662861 | 0.277121 |
| 0 | 0166 | 0.260788 | 0.161465 | 0.774951 |
| 0 | 0167 | 0.764979 | 0.167256 | 0.710814 |
| 0 | 0168 | 0.787269 | 0.637718 | 0.244995 |
| 0 | 0169 | 0.769153 | 0.323795 | 0.706760 |
| 0 | 0170 | 0.786563 | 0.833754 | 0.199181 |
| 0 | 0171 | 0.304653 | 0.747700 | 0.545948 |
| 0 | 0172 | 0.248628 | 0.247380 | 0.049339 |
| 0 | 0173 | 0.742878 | 0.246011 | 0.407591 |
| 0 | 0174 | 0.800424 | 0.744388 | 0.910745 |
| 0 | 0175 | 0.217229 | 0.843295 | 0.511044 |
| 0 | 0176 | 0.330370 | 0.348941 | 0.022332 |
| 0 | 0177 | 0.218084 | 0.648806 | 0.518193 |
| 0 | 0178 | 0.329496 | 0.144570 | 0.024163 |
| 0 | 0179 | 0.825787 | 0.150960 | 0.464299 |

|    |       |          |          |          |
|----|-------|----------|----------|----------|
| O  | O180  | 0.713967 | 0.649647 | 0.955148 |
| O  | O181  | 0.823059 | 0.345788 | 0.460857 |
| O  | O182  | 0.716151 | 0.839354 | 0.966729 |
| O  | O183  | 0.134410 | 0.746068 | 0.563040 |
| O  | O184  | 0.409134 | 0.246301 | 0.064593 |
| O  | O185  | 0.908283 | 0.250103 | 0.414644 |
| O  | O186  | 0.631464 | 0.748547 | 0.903625 |
| O  | O187  | 0.097156 | 0.841001 | 0.437843 |
| O  | O188  | 0.447230 | 0.340334 | 0.937916 |
| O  | O189  | 0.097470 | 0.646301 | 0.445819 |
| O  | O190  | 0.446699 | 0.151686 | 0.939493 |
| O  | O191  | 0.938515 | 0.165990 | 0.557279 |
| O  | O192  | 0.598540 | 0.662480 | 0.043502 |
| O  | O193  | 0.933289 | 0.331462 | 0.564278 |
| O  | O194  | 0.592155 | 0.843815 | 0.030444 |
| O  | O195  | 0.148529 | 0.834385 | 0.255985 |
| O  | O196  | 0.395462 | 0.330081 | 0.756251 |
| O  | O197  | 0.155582 | 0.666326 | 0.271215 |
| O  | O198  | 0.390235 | 0.164182 | 0.762736 |
| O  | O199  | 0.888701 | 0.128872 | 0.733462 |
| O  | O200  | 0.659018 | 0.649469 | 0.216688 |
| O  | O201  | 0.892428 | 0.361287 | 0.746549 |
| O  | O202  | 0.645056 | 0.827433 | 0.209875 |
| O  | O203  | 0.223796 | 0.748431 | 0.159966 |
| O  | O204  | 0.319432 | 0.247847 | 0.656655 |
| O  | O205  | 0.847991 | 0.244594 | 0.807214 |
| O  | O206  | 0.720826 | 0.738488 | 0.329904 |
| O  | O207  | 0.737006 | 0.766555 | 0.610267 |
| Al | Al208 | 0.818425 | 0.943432 | 0.783902 |
| Al | Al209 | 0.718553 | 0.819126 | 0.270764 |
| Si | Si210 | 0.738655 | 0.934265 | 0.431344 |
| Si | Si211 | 0.718335 | 0.660631 | 0.294663 |
| Si | Si212 | 0.447329 | 0.056865 | 0.188659 |
| Si | Si213 | 0.095575 | 0.557947 | 0.690217 |
| Si | Si214 | 0.447668 | 0.434343 | 0.189258 |
| Si | Si215 | 0.096522 | 0.935300 | 0.682823 |
| Si | Si216 | 0.596088 | 0.945071 | 0.803374 |
| Si | Si217 | 0.945745 | 0.445424 | 0.318087 |
| Si | Si218 | 0.591253 | 0.548985 | 0.816985 |
| Si | Si219 | 0.945747 | 0.055238 | 0.311109 |
| Si | Si220 | 0.339325 | 0.028981 | 0.339190 |
| Si | Si221 | 0.201440 | 0.529054 | 0.842431 |
| Si | Si222 | 0.340643 | 0.466433 | 0.340277 |
| Si | Si223 | 0.198739 | 0.966835 | 0.840091 |

|    |       |          |          |          |
|----|-------|----------|----------|----------|
| Si | Si224 | 0.696462 | 0.973754 | 0.641816 |
| Si | Si225 | 0.840732 | 0.465778 | 0.155236 |
| Si | Si226 | 0.705805 | 0.520615 | 0.671601 |
| Si | Si227 | 0.844081 | 0.030309 | 0.149609 |
| Si | Si228 | 0.297348 | 0.052243 | 0.556865 |
| Si | Si229 | 0.244309 | 0.552391 | 0.060606 |
| Si | Si230 | 0.298700 | 0.445072 | 0.558795 |
| Si | Si231 | 0.240442 | 0.945811 | 0.057252 |
| Si | Si232 | 0.798201 | 0.428401 | 0.944804 |
| Si | Si233 | 0.743842 | 0.558110 | 0.456576 |
| Si | Si234 | 0.791287 | 0.062705 | 0.944317 |
| Si | Si235 | 0.142627 | 0.060501 | 0.548366 |
| Si | Si236 | 0.400158 | 0.556488 | 0.050193 |
| Si | Si237 | 0.143191 | 0.437415 | 0.546897 |
| Si | Si238 | 0.394065 | 0.938903 | 0.045526 |
| Si | Si239 | 0.893482 | 0.930816 | 0.440482 |
| Si | Si240 | 0.642214 | 0.432948 | 0.959814 |
| Si | Si241 | 0.899472 | 0.572673 | 0.449820 |
| Si | Si242 | 0.639171 | 0.064757 | 0.951543 |
| Si | Si243 | 0.096893 | 0.029913 | 0.333371 |
| Si | Si244 | 0.442517 | 0.527059 | 0.831780 |
| Si | Si245 | 0.097573 | 0.467641 | 0.328244 |
| Si | Si246 | 0.443671 | 0.966724 | 0.829163 |
| Si | Si247 | 0.949298 | 0.965166 | 0.648172 |
| Si | Si248 | 0.594907 | 0.470263 | 0.170745 |
| Si | Si249 | 0.948227 | 0.532524 | 0.658880 |
| Si | Si250 | 0.593169 | 0.026454 | 0.159604 |
| Si | Si251 | 0.218235 | 0.068432 | 0.208563 |
| Si | Si252 | 0.319831 | 0.568879 | 0.708955 |
| Si | Si253 | 0.220416 | 0.427476 | 0.208140 |
| Si | Si254 | 0.318557 | 0.928359 | 0.707492 |
| Si | Si255 | 0.719571 | 0.440936 | 0.303461 |
| Si | Si256 | 0.827253 | 0.552800 | 0.806988 |
| Si | Si257 | 0.720345 | 0.057123 | 0.282812 |
| Si | Si258 | 0.443350 | 0.827076 | 0.184151 |
| Si | Si259 | 0.094387 | 0.327965 | 0.692268 |
| Si | Si260 | 0.451236 | 0.670862 | 0.191876 |
| Si | Si261 | 0.091880 | 0.170187 | 0.696102 |
| Si | Si262 | 0.591019 | 0.170774 | 0.799217 |
| Si | Si263 | 0.954964 | 0.671934 | 0.294847 |
| Si | Si264 | 0.593731 | 0.329459 | 0.802047 |
| Si | Si265 | 0.951254 | 0.831040 | 0.285294 |
| Si | Si266 | 0.339657 | 0.871259 | 0.334387 |
| Si | Si267 | 0.205564 | 0.370881 | 0.836211 |

|    |       |          |          |          |
|----|-------|----------|----------|----------|
| Si | Si268 | 0.344191 | 0.624567 | 0.334540 |
| Si | Si269 | 0.201784 | 0.125337 | 0.835374 |
| Si | Si270 | 0.704406 | 0.132551 | 0.653076 |
| Si | Si271 | 0.842037 | 0.624500 | 0.159449 |
| Si | Si272 | 0.708531 | 0.362148 | 0.653083 |
| Si | Si273 | 0.844355 | 0.869230 | 0.138540 |
| Si | Si274 | 0.293357 | 0.827090 | 0.539490 |
| Si | Si275 | 0.254207 | 0.327225 | 0.043221 |
| Si | Si276 | 0.294532 | 0.668205 | 0.540653 |
| Si | Si277 | 0.253482 | 0.167421 | 0.043070 |
| Si | Si278 | 0.749108 | 0.168836 | 0.441382 |
| Si | Si279 | 0.791646 | 0.668645 | 0.950367 |
| Si | Si280 | 0.747252 | 0.323813 | 0.438348 |
| Si | Si281 | 0.791931 | 0.823237 | 0.934761 |
| Si | Si282 | 0.141085 | 0.824151 | 0.535239 |
| Si | Si283 | 0.406293 | 0.324887 | 0.038850 |
| Si | Si284 | 0.141495 | 0.667304 | 0.541313 |
| Si | Si285 | 0.405793 | 0.167484 | 0.040019 |
| Si | Si286 | 0.902583 | 0.172793 | 0.450258 |
| Si | Si287 | 0.637488 | 0.671335 | 0.939272 |
| Si | Si288 | 0.900676 | 0.326106 | 0.454582 |
| Si | Si289 | 0.639185 | 0.826201 | 0.937561 |
| Si | Si290 | 0.096693 | 0.872903 | 0.326734 |
| Si | Si291 | 0.447526 | 0.369623 | 0.825258 |
| Si | Si292 | 0.099302 | 0.625082 | 0.329350 |
| Si | Si293 | 0.446487 | 0.126036 | 0.825232 |
| Si | Si294 | 0.949684 | 0.121558 | 0.656854 |
| Si | Si295 | 0.594794 | 0.628803 | 0.152902 |
| Si | Si296 | 0.948504 | 0.374400 | 0.663821 |
| Si | Si297 | 0.591260 | 0.866946 | 0.147410 |
| Si | Si298 | 0.218976 | 0.824200 | 0.201823 |
| Si | Si299 | 0.325023 | 0.322929 | 0.700622 |
| Si | Si300 | 0.221918 | 0.673596 | 0.205403 |
| Si | Si301 | 0.322594 | 0.172553 | 0.700618 |
| Si | Si302 | 0.827750 | 0.167751 | 0.785253 |
| Si | Si303 | 0.828619 | 0.321625 | 0.787555 |
| Zn | Zn304 | 0.765343 | 0.825594 | 0.702141 |
| Zn | Zn305 | 0.701323 | 0.774296 | 0.472297 |

**M-C<sub>4</sub>H<sub>9</sub>Zn-OH-ZnOZn<sup>2+</sup> (Fig. 4/M2)** Total energy = -1931.65794708 eV

data\_

\_audit\_creation\_method 'Materials Studio'

\_cell\_length\_a 20.357621

|                                |     |           |          |          |
|--------------------------------|-----|-----------|----------|----------|
| _cell_length_b                 |     | 20.050598 |          |          |
| _cell_length_c                 |     | 13.476578 |          |          |
| _cell_angle_alpha              |     | 90.000000 |          |          |
| _cell_angle_beta               |     | 90.000000 |          |          |
| _cell_angle_gamma              |     | 90.000000 |          |          |
| _symmetry_space_group_name_H-M |     | 'P1'      |          |          |
| loop_                          |     |           |          |          |
| _atom_site_type_symbol         |     |           |          |          |
| _atom_site_label               |     |           |          |          |
| _atom_site_fract_x             |     |           |          |          |
| _atom_site_fract_y             |     |           |          |          |
| _atom_site_fract_z             |     |           |          |          |
| H                              | H1  | 0.592336  | 0.694163 | 0.477140 |
| H                              | H2  | 0.559464  | 0.769415 | 0.430186 |
| H                              | H3  | 0.558813  | 0.816858 | 0.606200 |
| H                              | H4  | 0.588636  | 0.740250 | 0.650974 |
| H                              | H5  | 0.486498  | 0.683745 | 0.585509 |
| H                              | H6  | 0.457299  | 0.761868 | 0.545484 |
| H                              | H7  | 0.488106  | 0.724127 | 0.762385 |
| H                              | H8  | 0.408507  | 0.733132 | 0.711144 |
| H                              | H9  | 0.460165  | 0.803545 | 0.723112 |
| H                              | H10 | 0.764858  | 0.730324 | 0.599519 |
| C                              | C11 | 0.589194  | 0.748034 | 0.490281 |
| C                              | C12 | 0.558677  | 0.762850 | 0.591931 |
| C                              | C13 | 0.487807  | 0.737413 | 0.602109 |
| C                              | C14 | 0.459344  | 0.750231 | 0.705563 |
| O                              | O15 | 0.524748  | 0.042255 | 0.215711 |
| O                              | O16 | 0.018891  | 0.552163 | 0.712167 |
| O                              | O17 | 0.524687  | 0.446138 | 0.215594 |
| O                              | O18 | 0.017066  | 0.936346 | 0.695552 |
| O                              | O19 | 0.516669  | 0.940687 | 0.795171 |
| O                              | O20 | 0.022272  | 0.455957 | 0.292882 |
| O                              | O21 | 0.515335  | 0.540411 | 0.789055 |
| O                              | O22 | 0.023349  | 0.040155 | 0.291043 |
| O                              | O23 | 0.406768  | 0.057780 | 0.292240 |
| O                              | O24 | 0.133476  | 0.551645 | 0.797761 |
| O                              | O25 | 0.406234  | 0.432899 | 0.292226 |
| O                              | O26 | 0.130141  | 0.939274 | 0.792413 |
| O                              | O27 | 0.625596  | 0.956217 | 0.696847 |
| O                              | O28 | 0.904090  | 0.435674 | 0.219144 |
| O                              | O29 | 0.635179  | 0.531747 | 0.724293 |
| O                              | O30 | 0.909325  | 0.063370 | 0.206554 |
| O                              | O31 | 0.439634  | 0.124111 | 0.129384 |
| O                              | O32 | 0.114586  | 0.628649 | 0.640892 |

|   |     |          |          |          |
|---|-----|----------|----------|----------|
| 0 | 033 | 0.440752 | 0.361791 | 0.134085 |
| 0 | 034 | 0.116568 | 0.863785 | 0.633514 |
| 0 | 035 | 0.622418 | 0.867458 | 0.840192 |
| 0 | 036 | 0.940267 | 0.376750 | 0.386737 |
| 0 | 037 | 0.604436 | 0.621507 | 0.862990 |
| 0 | 038 | 0.941375 | 0.126085 | 0.373416 |
| 0 | 039 | 0.421171 | 0.993292 | 0.121730 |
| 0 | 040 | 0.120837 | 0.497704 | 0.618067 |
| 0 | 041 | 0.420843 | 0.491221 | 0.116532 |
| 0 | 042 | 0.121137 | 0.995188 | 0.614679 |
| 0 | 043 | 0.621050 | 0.996801 | 0.884080 |
| 0 | 044 | 0.916356 | 0.507405 | 0.382608 |
| 0 | 045 | 0.607072 | 0.492272 | 0.908600 |
| 0 | 046 | 0.913088 | 0.997028 | 0.376204 |
| 0 | 047 | 0.341895 | 0.037604 | 0.458959 |
| 0 | 048 | 0.200947 | 0.540572 | 0.962214 |
| 0 | 049 | 0.342407 | 0.453912 | 0.460233 |
| 0 | 050 | 0.196188 | 0.951712 | 0.958712 |
| 0 | 051 | 0.693964 | 0.941959 | 0.535008 |
| 0 | 052 | 0.836067 | 0.424304 | 0.053357 |
| 0 | 053 | 0.707148 | 0.556604 | 0.567646 |
| 0 | 054 | 0.840192 | 0.066604 | 0.041023 |
| 0 | 055 | 0.336940 | 0.947535 | 0.312878 |
| 0 | 056 | 0.213088 | 0.448339 | 0.819194 |
| 0 | 057 | 0.337636 | 0.543786 | 0.313152 |
| 0 | 058 | 0.208021 | 0.043859 | 0.815617 |
| 0 | 059 | 0.715864 | 0.048541 | 0.655468 |
| 0 | 060 | 0.853671 | 0.543504 | 0.132037 |
| 0 | 061 | 0.724142 | 0.442529 | 0.664896 |
| 0 | 062 | 0.862247 | 0.950725 | 0.131305 |
| 0 | 063 | 0.275797 | 0.061893 | 0.293645 |
| 0 | 064 | 0.263207 | 0.567515 | 0.793648 |
| 0 | 065 | 0.275056 | 0.428960 | 0.297119 |
| 0 | 066 | 0.261062 | 0.925778 | 0.791578 |
| 0 | 067 | 0.754022 | 0.928163 | 0.704815 |
| 0 | 068 | 0.774860 | 0.456042 | 0.220190 |
| 0 | 069 | 0.761728 | 0.556075 | 0.746189 |
| 0 | 070 | 0.781100 | 0.040207 | 0.209081 |
| 0 | 071 | 0.319034 | 0.120131 | 0.606920 |
| 0 | 072 | 0.220193 | 0.618666 | 0.116389 |
| 0 | 073 | 0.320358 | 0.373265 | 0.611115 |
| 0 | 074 | 0.225094 | 0.871875 | 0.108654 |
| 0 | 075 | 0.719285 | 0.861036 | 0.388522 |
| 0 | 076 | 0.805384 | 0.352554 | 0.895228 |

|   |      |          |          |          |
|---|------|----------|----------|----------|
| 0 | 077  | 0.713390 | 0.624685 | 0.404524 |
| 0 | 078  | 0.800766 | 0.128016 | 0.880058 |
| 0 | 079  | 0.220599 | 0.052990 | 0.524300 |
| 0 | 080  | 0.320586 | 0.553355 | 0.034367 |
| 0 | 081  | 0.221158 | 0.439703 | 0.527068 |
| 0 | 082  | 0.317296 | 0.947948 | 0.025708 |
| 0 | 083  | 0.815833 | 0.935233 | 0.465626 |
| 0 | 084  | 0.720843 | 0.442316 | 0.965167 |
| 0 | 085  | 0.822590 | 0.571285 | 0.482284 |
| 0 | 086  | 0.714573 | 0.060149 | 0.986725 |
| 0 | 087  | 0.309094 | 0.990308 | 0.635438 |
| 0 | 088  | 0.228912 | 0.487849 | 0.135956 |
| 0 | 089  | 0.309270 | 0.503523 | 0.635246 |
| 0 | 090  | 0.223099 | 0.002105 | 0.135815 |
| 0 | 091  | 0.718583 | 0.993724 | 0.362264 |
| 0 | 092  | 0.829526 | 0.481500 | 0.875432 |
| 0 | 093  | 0.733740 | 0.492790 | 0.399491 |
| 0 | 094  | 0.803699 | 0.994697 | 0.884773 |
| 0 | 095  | 0.127072 | 0.127731 | 0.605343 |
| 0 | 096  | 0.420988 | 0.623703 | 0.104013 |
| 0 | 097  | 0.125544 | 0.365611 | 0.602051 |
| 0 | 098  | 0.405326 | 0.862704 | 0.097174 |
| 0 | 099  | 0.908608 | 0.864186 | 0.374541 |
| 0 | 0100 | 0.626410 | 0.360577 | 0.903180 |
| 0 | 0101 | 0.919592 | 0.639546 | 0.399333 |
| 0 | 0102 | 0.624377 | 0.129404 | 0.890484 |
| 0 | 0103 | 0.101621 | 0.058128 | 0.444798 |
| 0 | 0104 | 0.436563 | 0.551547 | 0.944240 |
| 0 | 0105 | 0.103025 | 0.439714 | 0.444253 |
| 0 | 0106 | 0.435219 | 0.939830 | 0.944790 |
| 0 | 0107 | 0.935957 | 0.927242 | 0.541372 |
| 0 | 0108 | 0.614300 | 0.423536 | 0.075394 |
| 0 | 0109 | 0.941911 | 0.566335 | 0.556616 |
| 0 | 0110 | 0.591951 | 0.059568 | 0.050446 |
| 0 | 0111 | 0.147724 | 0.069578 | 0.260945 |
| 0 | 0112 | 0.391123 | 0.563216 | 0.760288 |
| 0 | 0113 | 0.146999 | 0.424850 | 0.259085 |
| 0 | 0114 | 0.390089 | 0.928836 | 0.760240 |
| 0 | 0115 | 0.890840 | 0.951379 | 0.723547 |
| 0 | 0116 | 0.648485 | 0.456340 | 0.261149 |
| 0 | 0117 | 0.891423 | 0.550755 | 0.737309 |
| 0 | 0118 | 0.652291 | 0.059954 | 0.225302 |
| 0 | 0119 | 0.116623 | 0.950911 | 0.331181 |
| 0 | 0120 | 0.428043 | 0.445177 | 0.827793 |

|   |      |          |          |          |
|---|------|----------|----------|----------|
| 0 | 0121 | 0.116888 | 0.544381 | 0.324188 |
| 0 | 0122 | 0.436441 | 0.044149 | 0.822851 |
| 0 | 0123 | 0.958264 | 0.043917 | 0.623352 |
| 0 | 0124 | 0.595212 | 0.545942 | 0.140316 |
| 0 | 0125 | 0.949639 | 0.449660 | 0.642470 |
| 0 | 0126 | 0.606683 | 0.946896 | 0.151559 |
| 0 | 0127 | 0.230033 | 0.134432 | 0.147164 |
| 0 | 0128 | 0.315893 | 0.635556 | 0.646848 |
| 0 | 0129 | 0.229001 | 0.355776 | 0.149867 |
| 0 | 0130 | 0.314131 | 0.858039 | 0.644431 |
| 0 | 0131 | 0.813403 | 0.853623 | 0.826970 |
| 0 | 0132 | 0.725214 | 0.367378 | 0.347206 |
| 0 | 0133 | 0.832780 | 0.613822 | 0.883580 |
| 0 | 0134 | 0.731952 | 0.125508 | 0.339969 |
| 0 | 0135 | 0.520719 | 0.851886 | 0.190010 |
| 0 | 0136 | 0.020040 | 0.349600 | 0.717334 |
| 0 | 0137 | 0.528713 | 0.649551 | 0.212048 |
| 0 | 0138 | 0.018144 | 0.145103 | 0.714451 |
| 0 | 0139 | 0.519838 | 0.140925 | 0.773753 |
| 0 | 0140 | 0.026489 | 0.637015 | 0.284133 |
| 0 | 0141 | 0.522250 | 0.356700 | 0.783488 |
| 0 | 0142 | 0.024282 | 0.863427 | 0.281450 |
| 0 | 0143 | 0.410685 | 0.839199 | 0.290994 |
| 0 | 0144 | 0.137837 | 0.341104 | 0.795667 |
| 0 | 0145 | 0.412725 | 0.652158 | 0.296137 |
| 0 | 0146 | 0.133968 | 0.152858 | 0.798754 |
| 0 | 0147 | 0.637873 | 0.152278 | 0.696747 |
| 0 | 0148 | 0.910941 | 0.652955 | 0.203616 |
| 0 | 0149 | 0.639889 | 0.345301 | 0.707294 |
| 0 | 0150 | 0.916443 | 0.836005 | 0.181228 |
| 0 | 0151 | 0.444392 | 0.745390 | 0.162016 |
| 0 | 0152 | 0.097122 | 0.246890 | 0.670809 |
| 0 | 0153 | 0.593216 | 0.246902 | 0.818673 |
| 0 | 0154 | 0.961006 | 0.750176 | 0.316024 |
| 0 | 0155 | 0.340210 | 0.854252 | 0.452350 |
| 0 | 0156 | 0.210364 | 0.353950 | 0.956308 |
| 0 | 0157 | 0.338572 | 0.636052 | 0.453895 |
| 0 | 0158 | 0.209772 | 0.137268 | 0.954311 |
| 0 | 0159 | 0.704704 | 0.148738 | 0.529044 |
| 0 | 0160 | 0.822221 | 0.664056 | 0.065278 |
| 0 | 0161 | 0.705623 | 0.341010 | 0.539572 |
| 0 | 0162 | 0.844258 | 0.843853 | 0.019629 |
| 0 | 0163 | 0.279836 | 0.832383 | 0.280204 |
| 0 | 0164 | 0.268125 | 0.332411 | 0.782881 |



|    |       |          |          |          |
|----|-------|----------|----------|----------|
| 0  | 0165  | 0.283312 | 0.660727 | 0.278608 |
| 0  | 0166  | 0.263435 | 0.159427 | 0.777465 |
| 0  | 0167  | 0.768375 | 0.165188 | 0.698073 |
| 0  | 0168  | 0.785932 | 0.625329 | 0.245293 |
| 0  | 0169  | 0.769249 | 0.323776 | 0.709460 |
| 0  | 0170  | 0.787011 | 0.851692 | 0.198434 |
| 0  | 0171  | 0.301208 | 0.745850 | 0.547494 |
| 0  | 0172  | 0.249283 | 0.245220 | 0.050488 |
| 0  | 0173  | 0.744078 | 0.246882 | 0.411685 |
| 0  | 0174  | 0.801198 | 0.739514 | 0.909552 |
| 0  | 0175  | 0.217198 | 0.844149 | 0.511886 |
| 0  | 0176  | 0.331627 | 0.346459 | 0.027310 |
| 0  | 0177  | 0.216644 | 0.645876 | 0.518838 |
| 0  | 0178  | 0.331347 | 0.143484 | 0.021881 |
| 0  | 0179  | 0.828313 | 0.151829 | 0.465705 |
| 0  | 0180  | 0.715140 | 0.645388 | 0.957343 |
| 0  | 0181  | 0.825973 | 0.344442 | 0.468322 |
| 0  | 0182  | 0.719233 | 0.836789 | 0.964160 |
| 0  | 0183  | 0.135196 | 0.745564 | 0.561705 |
| 0  | 0184  | 0.411611 | 0.243836 | 0.066240 |
| 0  | 0185  | 0.911664 | 0.249996 | 0.417422 |
| 0  | 0186  | 0.633626 | 0.745324 | 0.907058 |
| 0  | 0187  | 0.096647 | 0.842442 | 0.440269 |
| 0  | 0188  | 0.447656 | 0.338322 | 0.939966 |
| 0  | 0189  | 0.095828 | 0.645041 | 0.447813 |
| 0  | 0190  | 0.448413 | 0.151221 | 0.936794 |
| 0  | 0191  | 0.939526 | 0.166831 | 0.562606 |
| 0  | 0192  | 0.602299 | 0.662740 | 0.052184 |
| 0  | 0193  | 0.936216 | 0.328608 | 0.570059 |
| 0  | 0194  | 0.595418 | 0.844087 | 0.029871 |
| 0  | 0195  | 0.150327 | 0.833180 | 0.260456 |
| 0  | 0196  | 0.396908 | 0.327468 | 0.757494 |
| 0  | 0197  | 0.153557 | 0.665010 | 0.272845 |
| 0  | 0198  | 0.392440 | 0.160197 | 0.758962 |
| 0  | 0199  | 0.890630 | 0.126682 | 0.737531 |
| 0  | 0200  | 0.657945 | 0.645405 | 0.228966 |
| 0  | 0201  | 0.892960 | 0.357504 | 0.751824 |
| 0  | 0202  | 0.648133 | 0.827176 | 0.209136 |
| 0  | 0203  | 0.222348 | 0.746257 | 0.161105 |
| 0  | 0204  | 0.320403 | 0.246055 | 0.657806 |
| 0  | 0205  | 0.845254 | 0.241137 | 0.808249 |
| 0  | 0206  | 0.732450 | 0.739073 | 0.314383 |
| 0  | 0207  | 0.750329 | 0.776105 | 0.592764 |
| Al | Al208 | 0.821160 | 0.941379 | 0.791213 |

|    |       |          |          |          |
|----|-------|----------|----------|----------|
| Al | Al209 | 0.723142 | 0.820683 | 0.268285 |
| Si | Si210 | 0.738381 | 0.933393 | 0.435047 |
| Si | Si211 | 0.722138 | 0.660816 | 0.296437 |
| Si | Si212 | 0.448086 | 0.054430 | 0.189210 |
| Si | Si213 | 0.097047 | 0.557378 | 0.691239 |
| Si | Si214 | 0.448098 | 0.433207 | 0.189529 |
| Si | Si215 | 0.095881 | 0.934072 | 0.683720 |
| Si | Si216 | 0.595537 | 0.940763 | 0.806442 |
| Si | Si217 | 0.945825 | 0.444105 | 0.321113 |
| Si | Si218 | 0.591272 | 0.546510 | 0.822153 |
| Si | Si219 | 0.946849 | 0.056596 | 0.312284 |
| Si | Si220 | 0.340393 | 0.026305 | 0.339988 |
| Si | Si221 | 0.202827 | 0.526960 | 0.844097 |
| Si | Si222 | 0.340370 | 0.464882 | 0.341097 |
| Si | Si223 | 0.198894 | 0.964988 | 0.840199 |
| Si | Si224 | 0.696571 | 0.970540 | 0.647044 |
| Si | Si225 | 0.842140 | 0.464907 | 0.157148 |
| Si | Si226 | 0.706923 | 0.521193 | 0.675511 |
| Si | Si227 | 0.848335 | 0.029542 | 0.147109 |
| Si | Si228 | 0.297352 | 0.050125 | 0.556923 |
| Si | Si229 | 0.243185 | 0.550184 | 0.063090 |
| Si | Si230 | 0.298118 | 0.442440 | 0.558915 |
| Si | Si231 | 0.240505 | 0.943327 | 0.057966 |
| Si | Si232 | 0.797987 | 0.425042 | 0.947660 |
| Si | Si233 | 0.744512 | 0.560936 | 0.461627 |
| Si | Si234 | 0.790516 | 0.061359 | 0.946877 |
| Si | Si235 | 0.142637 | 0.058459 | 0.547823 |
| Si | Si236 | 0.399462 | 0.554935 | 0.050385 |
| Si | Si237 | 0.142865 | 0.435799 | 0.548223 |
| Si | Si238 | 0.394640 | 0.935815 | 0.047758 |
| Si | Si239 | 0.893996 | 0.930961 | 0.439181 |
| Si | Si240 | 0.642137 | 0.429210 | 0.962783 |
| Si | Si241 | 0.900132 | 0.570432 | 0.454450 |
| Si | Si242 | 0.638337 | 0.061529 | 0.952516 |
| Si | Si243 | 0.097187 | 0.029639 | 0.332132 |
| Si | Si244 | 0.442533 | 0.524827 | 0.831029 |
| Si | Si245 | 0.097259 | 0.465910 | 0.330409 |
| Si | Si246 | 0.444192 | 0.963850 | 0.830898 |
| Si | Si247 | 0.949252 | 0.964610 | 0.647746 |
| Si | Si248 | 0.595910 | 0.467970 | 0.172971 |
| Si | Si249 | 0.949997 | 0.529320 | 0.663089 |
| Si | Si250 | 0.594064 | 0.026242 | 0.161062 |
| Si | Si251 | 0.219308 | 0.066143 | 0.209018 |
| Si | Si252 | 0.319726 | 0.566551 | 0.708671 |

|    |       |          |          |          |
|----|-------|----------|----------|----------|
| Si | Si253 | 0.219868 | 0.425055 | 0.210265 |
| Si | Si254 | 0.318565 | 0.926513 | 0.707856 |
| Si | Si255 | 0.720820 | 0.443333 | 0.306286 |
| Si | Si256 | 0.828924 | 0.549537 | 0.810752 |
| Si | Si257 | 0.721248 | 0.054923 | 0.283661 |
| Si | Si258 | 0.446242 | 0.824669 | 0.184706 |
| Si | Si259 | 0.095022 | 0.325602 | 0.696430 |
| Si | Si260 | 0.451927 | 0.667949 | 0.193491 |
| Si | Si261 | 0.093728 | 0.168185 | 0.697032 |
| Si | Si262 | 0.593846 | 0.167726 | 0.794978 |
| Si | Si263 | 0.954645 | 0.670525 | 0.300877 |
| Si | Si264 | 0.595341 | 0.326894 | 0.803448 |
| Si | Si265 | 0.952408 | 0.828369 | 0.288009 |
| Si | Si266 | 0.341868 | 0.868199 | 0.333896 |
| Si | Si267 | 0.207202 | 0.368798 | 0.838375 |
| Si | Si268 | 0.342961 | 0.623158 | 0.335508 |
| Si | Si269 | 0.203856 | 0.123290 | 0.836497 |
| Si | Si270 | 0.706217 | 0.129089 | 0.645559 |
| Si | Si271 | 0.843245 | 0.621215 | 0.162116 |
| Si | Si272 | 0.709435 | 0.363052 | 0.655302 |
| Si | Si273 | 0.850365 | 0.870502 | 0.134887 |
| Si | Si274 | 0.293043 | 0.825500 | 0.539387 |
| Si | Si275 | 0.255196 | 0.325112 | 0.046096 |
| Si | Si276 | 0.292851 | 0.666215 | 0.541562 |
| Si | Si277 | 0.255381 | 0.165374 | 0.043448 |
| Si | Si278 | 0.752311 | 0.168341 | 0.436466 |
| Si | Si279 | 0.792685 | 0.664744 | 0.954080 |
| Si | Si280 | 0.750170 | 0.324657 | 0.442112 |
| Si | Si281 | 0.794841 | 0.818488 | 0.934655 |
| Si | Si282 | 0.141243 | 0.824050 | 0.536350 |
| Si | Si283 | 0.407764 | 0.322602 | 0.041661 |
| Si | Si284 | 0.140624 | 0.666411 | 0.542266 |
| Si | Si285 | 0.407854 | 0.165477 | 0.038380 |
| Si | Si286 | 0.905350 | 0.173022 | 0.454233 |
| Si | Si287 | 0.638648 | 0.668640 | 0.945587 |
| Si | Si288 | 0.903574 | 0.325219 | 0.460271 |
| Si | Si289 | 0.641719 | 0.823506 | 0.937734 |
| Si | Si290 | 0.097138 | 0.872396 | 0.327907 |
| Si | Si291 | 0.448606 | 0.367013 | 0.827156 |
| Si | Si292 | 0.098266 | 0.622888 | 0.331775 |
| Si | Si293 | 0.449016 | 0.123923 | 0.823181 |
| Si | Si294 | 0.951261 | 0.120508 | 0.659929 |
| Si | Si295 | 0.596515 | 0.625921 | 0.159487 |
| Si | Si296 | 0.949799 | 0.371020 | 0.670534 |

|    |       |          |          |          |
|----|-------|----------|----------|----------|
| Si | Si297 | 0.594151 | 0.866597 | 0.147413 |
| Si | Si298 | 0.219443 | 0.822177 | 0.202778 |
| Si | Si299 | 0.326368 | 0.321021 | 0.702110 |
| Si | Si300 | 0.220018 | 0.671554 | 0.206995 |
| Si | Si301 | 0.323751 | 0.170377 | 0.700306 |
| Si | Si302 | 0.826512 | 0.164751 | 0.781187 |
| Si | Si303 | 0.828058 | 0.318899 | 0.790903 |
| Zn | Zn304 | 0.769511 | 0.829067 | 0.700818 |
| Zn | Zn305 | 0.678178 | 0.784499 | 0.473655 |

### TS-C<sub>4</sub>H<sub>9</sub>Zn-HTransfer-Concerted-ZnOZn<sup>2+</sup> (Fig. 4/TS2)

Total energy = -1929.38299437 eV

data\_

\_audit\_creation\_method 'Materials Studio'

\_cell\_length\_a 20.357621

\_cell\_length\_b 20.050598

\_cell\_length\_c 13.476578

\_cell\_angle\_alpha 90.000000

\_cell\_angle\_beta 90.000000

\_cell\_angle\_gamma 90.000000

\_symmetry\_space\_group\_name\_H-M 'P1'

loop\_

\_atom\_site\_type\_symbol

\_atom\_site\_label

\_atom\_site\_fract\_x

\_atom\_site\_fract\_y

\_atom\_site\_fract\_z

|   |     |          |          |          |
|---|-----|----------|----------|----------|
| H | H1  | 0.576403 | 0.752031 | 0.407882 |
| H | H2  | 0.655113 | 0.754098 | 0.640997 |
| H | H3  | 0.583271 | 0.839746 | 0.440571 |
| H | H4  | 0.550206 | 0.818607 | 0.606927 |
| H | H5  | 0.612677 | 0.752017 | 0.639764 |
| H | H6  | 0.533141 | 0.672960 | 0.538255 |
| H | H7  | 0.469292 | 0.731635 | 0.535226 |
| H | H8  | 0.539419 | 0.684455 | 0.724965 |
| H | H9  | 0.458428 | 0.664534 | 0.688075 |
| H | H10 | 0.478427 | 0.747402 | 0.721510 |
| C | C11 | 0.589053 | 0.788196 | 0.465380 |
| C | C12 | 0.559943 | 0.775205 | 0.560201 |
| C | C13 | 0.514137 | 0.717384 | 0.576210 |
| C | C14 | 0.496625 | 0.702520 | 0.684069 |
| O | O15 | 0.529922 | 0.042128 | 0.214570 |
| O | O16 | 0.025269 | 0.545430 | 0.718485 |

|   |     |          |          |          |
|---|-----|----------|----------|----------|
| 0 | 017 | 0.526818 | 0.447353 | 0.220700 |
| 0 | 018 | 0.021682 | 0.932809 | 0.694286 |
| 0 | 019 | 0.519576 | 0.940304 | 0.792153 |
| 0 | 020 | 0.021952 | 0.455519 | 0.298660 |
| 0 | 021 | 0.519480 | 0.534040 | 0.798202 |
| 0 | 022 | 0.028081 | 0.046290 | 0.290906 |
| 0 | 023 | 0.413021 | 0.052248 | 0.294335 |
| 0 | 024 | 0.141070 | 0.554471 | 0.799075 |
| 0 | 025 | 0.406594 | 0.431235 | 0.288102 |
| 0 | 026 | 0.133469 | 0.938593 | 0.794982 |
| 0 | 027 | 0.628811 | 0.947159 | 0.691131 |
| 0 | 028 | 0.901870 | 0.438157 | 0.232704 |
| 0 | 029 | 0.641885 | 0.534998 | 0.744208 |
| 0 | 030 | 0.916027 | 0.052462 | 0.199776 |
| 0 | 031 | 0.440370 | 0.120748 | 0.131394 |
| 0 | 032 | 0.114054 | 0.628858 | 0.643264 |
| 0 | 033 | 0.447960 | 0.360975 | 0.132585 |
| 0 | 034 | 0.124772 | 0.865735 | 0.633082 |
| 0 | 035 | 0.621953 | 0.863479 | 0.841190 |
| 0 | 036 | 0.940785 | 0.378641 | 0.398321 |
| 0 | 037 | 0.599789 | 0.618106 | 0.885251 |
| 0 | 038 | 0.937040 | 0.129785 | 0.358834 |
| 0 | 039 | 0.427784 | 0.989566 | 0.121654 |
| 0 | 040 | 0.129787 | 0.498601 | 0.621364 |
| 0 | 041 | 0.426680 | 0.490001 | 0.112824 |
| 0 | 042 | 0.124682 | 0.997565 | 0.619964 |
| 0 | 043 | 0.626918 | 0.994005 | 0.875654 |
| 0 | 044 | 0.920094 | 0.509944 | 0.394894 |
| 0 | 045 | 0.608689 | 0.488238 | 0.923197 |
| 0 | 046 | 0.921032 | 0.000202 | 0.381169 |
| 0 | 047 | 0.345554 | 0.037339 | 0.459647 |
| 0 | 048 | 0.204835 | 0.538691 | 0.964521 |
| 0 | 049 | 0.345821 | 0.452480 | 0.459134 |
| 0 | 050 | 0.200468 | 0.950741 | 0.960751 |
| 0 | 051 | 0.696653 | 0.953689 | 0.526399 |
| 0 | 052 | 0.837550 | 0.424155 | 0.065027 |
| 0 | 053 | 0.710607 | 0.551137 | 0.582509 |
| 0 | 054 | 0.845931 | 0.052879 | 0.034606 |
| 0 | 055 | 0.338103 | 0.945579 | 0.316135 |
| 0 | 056 | 0.215428 | 0.447218 | 0.820001 |
| 0 | 057 | 0.339806 | 0.542606 | 0.312524 |
| 0 | 058 | 0.210472 | 0.043780 | 0.818669 |
| 0 | 059 | 0.714024 | 0.047276 | 0.669344 |
| 0 | 060 | 0.846623 | 0.544040 | 0.145786 |

|   |      |          |          |          |
|---|------|----------|----------|----------|
| 0 | 061  | 0.727798 | 0.441603 | 0.689209 |
| 0 | 062  | 0.843803 | 0.946228 | 0.152295 |
| 0 | 063  | 0.282716 | 0.062460 | 0.291414 |
| 0 | 064  | 0.271822 | 0.563635 | 0.799490 |
| 0 | 065  | 0.275862 | 0.427944 | 0.298504 |
| 0 | 066  | 0.264471 | 0.926143 | 0.792822 |
| 0 | 067  | 0.757825 | 0.924730 | 0.693327 |
| 0 | 068  | 0.771851 | 0.452231 | 0.229134 |
| 0 | 069  | 0.769582 | 0.556741 | 0.757939 |
| 0 | 070  | 0.787400 | 0.060592 | 0.206815 |
| 0 | 071  | 0.321585 | 0.119337 | 0.608053 |
| 0 | 072  | 0.219752 | 0.618146 | 0.118303 |
| 0 | 073  | 0.322687 | 0.371476 | 0.609659 |
| 0 | 074  | 0.230345 | 0.870706 | 0.110267 |
| 0 | 075  | 0.725493 | 0.866400 | 0.386147 |
| 0 | 076  | 0.812100 | 0.349601 | 0.907519 |
| 0 | 077  | 0.713113 | 0.624036 | 0.424471 |
| 0 | 078  | 0.807452 | 0.120348 | 0.879498 |
| 0 | 079  | 0.223765 | 0.052081 | 0.523244 |
| 0 | 080  | 0.321915 | 0.551792 | 0.044792 |
| 0 | 081  | 0.224027 | 0.436727 | 0.522031 |
| 0 | 082  | 0.321808 | 0.947494 | 0.027606 |
| 0 | 083  | 0.820052 | 0.941313 | 0.465451 |
| 0 | 084  | 0.724529 | 0.439040 | 0.969441 |
| 0 | 085  | 0.825505 | 0.572583 | 0.495051 |
| 0 | 086  | 0.718885 | 0.054628 | 0.985099 |
| 0 | 087  | 0.311594 | 0.989417 | 0.635105 |
| 0 | 088  | 0.226845 | 0.487474 | 0.140408 |
| 0 | 089  | 0.308796 | 0.501533 | 0.633596 |
| 0 | 090  | 0.226871 | 0.000779 | 0.137996 |
| 0 | 091  | 0.727810 | 0.996784 | 0.349692 |
| 0 | 092  | 0.834973 | 0.478771 | 0.885254 |
| 0 | 093  | 0.738824 | 0.493911 | 0.410060 |
| 0 | 094  | 0.802902 | 0.987116 | 0.876727 |
| 0 | 095  | 0.132412 | 0.129462 | 0.604628 |
| 0 | 096  | 0.423615 | 0.622821 | 0.106754 |
| 0 | 097  | 0.129173 | 0.366117 | 0.604469 |
| 0 | 098  | 0.408736 | 0.859902 | 0.097277 |
| 0 | 099  | 0.909020 | 0.867974 | 0.370148 |
| 0 | 0100 | 0.627036 | 0.356615 | 0.920624 |
| 0 | 0101 | 0.922230 | 0.641776 | 0.411512 |
| 0 | 0102 | 0.627756 | 0.125845 | 0.893312 |
| 0 | 0103 | 0.103733 | 0.057324 | 0.447923 |
| 0 | 0104 | 0.433093 | 0.554806 | 0.942403 |

|   |      |          |          |          |
|---|------|----------|----------|----------|
| 0 | 0105 | 0.103141 | 0.442234 | 0.449414 |
| 0 | 0106 | 0.438808 | 0.935475 | 0.943758 |
| 0 | 0107 | 0.939712 | 0.924536 | 0.540785 |
| 0 | 0108 | 0.623020 | 0.422537 | 0.091405 |
| 0 | 0109 | 0.944461 | 0.567519 | 0.569750 |
| 0 | 0110 | 0.595330 | 0.050045 | 0.046209 |
| 0 | 0111 | 0.153811 | 0.068525 | 0.266510 |
| 0 | 0112 | 0.397707 | 0.555541 | 0.752601 |
| 0 | 0113 | 0.146964 | 0.424085 | 0.265215 |
| 0 | 0114 | 0.393296 | 0.928450 | 0.759081 |
| 0 | 0115 | 0.895577 | 0.944770 | 0.724726 |
| 0 | 0116 | 0.647596 | 0.457856 | 0.279925 |
| 0 | 0117 | 0.899499 | 0.551770 | 0.754775 |
| 0 | 0118 | 0.656918 | 0.063766 | 0.218757 |
| 0 | 0119 | 0.116126 | 0.951099 | 0.332170 |
| 0 | 0120 | 0.429598 | 0.441949 | 0.840624 |
| 0 | 0121 | 0.116250 | 0.544914 | 0.324602 |
| 0 | 0122 | 0.438953 | 0.042730 | 0.828739 |
| 0 | 0123 | 0.960889 | 0.039998 | 0.626254 |
| 0 | 0124 | 0.601606 | 0.546049 | 0.150402 |
| 0 | 0125 | 0.947383 | 0.448605 | 0.651565 |
| 0 | 0126 | 0.613758 | 0.945147 | 0.163832 |
| 0 | 0127 | 0.231307 | 0.133358 | 0.147422 |
| 0 | 0128 | 0.319935 | 0.632680 | 0.649770 |
| 0 | 0129 | 0.226972 | 0.355169 | 0.152571 |
| 0 | 0130 | 0.316230 | 0.857263 | 0.645561 |
| 0 | 0131 | 0.810215 | 0.847674 | 0.822265 |
| 0 | 0132 | 0.724654 | 0.367844 | 0.363049 |
| 0 | 0133 | 0.837208 | 0.610775 | 0.902675 |
| 0 | 0134 | 0.727658 | 0.130821 | 0.344452 |
| 0 | 0135 | 0.523643 | 0.852436 | 0.193187 |
| 0 | 0136 | 0.025092 | 0.352174 | 0.721726 |
| 0 | 0137 | 0.528814 | 0.645714 | 0.220914 |
| 0 | 0138 | 0.020820 | 0.143978 | 0.708971 |
| 0 | 0139 | 0.521849 | 0.139376 | 0.778603 |
| 0 | 0140 | 0.025864 | 0.639093 | 0.290250 |
| 0 | 0141 | 0.526169 | 0.356456 | 0.794196 |
| 0 | 0142 | 0.026593 | 0.861214 | 0.282143 |
| 0 | 0143 | 0.413509 | 0.838197 | 0.291733 |
| 0 | 0144 | 0.143788 | 0.338003 | 0.796745 |
| 0 | 0145 | 0.411273 | 0.653543 | 0.298012 |
| 0 | 0146 | 0.135230 | 0.152153 | 0.798406 |
| 0 | 0147 | 0.639273 | 0.154854 | 0.701510 |
| 0 | 0148 | 0.908951 | 0.650525 | 0.214690 |

|   |      |          |          |          |
|---|------|----------|----------|----------|
| 0 | 0149 | 0.644967 | 0.342748 | 0.725092 |
| 0 | 0150 | 0.919539 | 0.839487 | 0.177839 |
| 0 | 0151 | 0.449736 | 0.744186 | 0.164403 |
| 0 | 0152 | 0.098516 | 0.247242 | 0.671156 |
| 0 | 0153 | 0.593499 | 0.244623 | 0.831254 |
| 0 | 0154 | 0.957838 | 0.751675 | 0.317739 |
| 0 | 0155 | 0.345010 | 0.851237 | 0.454197 |
| 0 | 0156 | 0.215376 | 0.353750 | 0.957990 |
| 0 | 0157 | 0.338948 | 0.633056 | 0.456148 |
| 0 | 0158 | 0.210872 | 0.138952 | 0.954555 |
| 0 | 0159 | 0.706738 | 0.143366 | 0.535500 |
| 0 | 0160 | 0.816874 | 0.664664 | 0.080047 |
| 0 | 0161 | 0.708109 | 0.344519 | 0.555821 |
| 0 | 0162 | 0.844632 | 0.848829 | 0.016746 |
| 0 | 0163 | 0.282714 | 0.829927 | 0.282937 |
| 0 | 0164 | 0.274626 | 0.332950 | 0.785653 |
| 0 | 0165 | 0.281528 | 0.658332 | 0.282777 |
| 0 | 0166 | 0.264741 | 0.159290 | 0.777378 |
| 0 | 0167 | 0.769691 | 0.164547 | 0.703720 |
| 0 | 0168 | 0.784640 | 0.629833 | 0.262986 |
| 0 | 0169 | 0.774563 | 0.322234 | 0.721524 |
| 0 | 0170 | 0.790239 | 0.829511 | 0.195537 |
| 0 | 0171 | 0.307336 | 0.743618 | 0.552286 |
| 0 | 0172 | 0.251487 | 0.244918 | 0.053951 |
| 0 | 0173 | 0.742778 | 0.248098 | 0.429197 |
| 0 | 0174 | 0.805163 | 0.737678 | 0.919759 |
| 0 | 0175 | 0.221695 | 0.839480 | 0.509092 |
| 0 | 0176 | 0.334012 | 0.346469 | 0.039437 |
| 0 | 0177 | 0.218552 | 0.646429 | 0.525762 |
| 0 | 0178 | 0.332524 | 0.142489 | 0.022859 |
| 0 | 0179 | 0.828836 | 0.151393 | 0.465498 |
| 0 | 0180 | 0.716218 | 0.644580 | 0.959360 |
| 0 | 0181 | 0.827381 | 0.344472 | 0.480621 |
| 0 | 0182 | 0.719950 | 0.834577 | 0.964784 |
| 0 | 0183 | 0.136050 | 0.745733 | 0.564623 |
| 0 | 0184 | 0.412175 | 0.241472 | 0.075342 |
| 0 | 0185 | 0.911957 | 0.251104 | 0.422183 |
| 0 | 0186 | 0.631501 | 0.743489 | 0.916232 |
| 0 | 0187 | 0.100113 | 0.842237 | 0.441049 |
| 0 | 0188 | 0.445241 | 0.329687 | 0.940287 |
| 0 | 0189 | 0.098647 | 0.644759 | 0.450442 |
| 0 | 0190 | 0.449726 | 0.151588 | 0.940242 |
| 0 | 0191 | 0.944105 | 0.159718 | 0.553199 |
| 0 | 0192 | 0.609684 | 0.665510 | 0.069780 |



|    |       |          |          |          |
|----|-------|----------|----------|----------|
| O  | O193  | 0.938722 | 0.326522 | 0.578927 |
| O  | O194  | 0.598084 | 0.847152 | 0.033537 |
| O  | O195  | 0.153270 | 0.834666 | 0.260804 |
| O  | O196  | 0.402712 | 0.328117 | 0.752652 |
| O  | O197  | 0.152322 | 0.665838 | 0.273056 |
| O  | O198  | 0.394103 | 0.157782 | 0.761947 |
| O  | O199  | 0.893242 | 0.127804 | 0.731073 |
| O  | O200  | 0.655916 | 0.645871 | 0.251299 |
| O  | O201  | 0.899195 | 0.352452 | 0.763508 |
| O  | O202  | 0.650199 | 0.822881 | 0.212706 |
| O  | O203  | 0.224009 | 0.745493 | 0.163228 |
| O  | O204  | 0.324109 | 0.245033 | 0.659559 |
| O  | O205  | 0.847962 | 0.237083 | 0.818455 |
| O  | O206  | 0.727317 | 0.740238 | 0.340100 |
| O  | O207  | 0.722894 | 0.766026 | 0.609121 |
| Al | Al208 | 0.822508 | 0.934063 | 0.783414 |
| Al | Al209 | 0.724689 | 0.817826 | 0.273923 |
| Si | Si210 | 0.743409 | 0.939578 | 0.430151 |
| Si | Si211 | 0.720385 | 0.661145 | 0.317632 |
| Si | Si212 | 0.452732 | 0.051259 | 0.189807 |
| Si | Si213 | 0.102210 | 0.556627 | 0.694386 |
| Si | Si214 | 0.451666 | 0.432533 | 0.188629 |
| Si | Si215 | 0.100498 | 0.934129 | 0.685180 |
| Si | Si216 | 0.598625 | 0.936951 | 0.802242 |
| Si | Si217 | 0.946073 | 0.445755 | 0.332153 |
| Si | Si218 | 0.593604 | 0.543772 | 0.838505 |
| Si | Si219 | 0.950271 | 0.057333 | 0.308178 |
| Si | Si220 | 0.344829 | 0.024528 | 0.341004 |
| Si | Si221 | 0.208390 | 0.525850 | 0.846533 |
| Si | Si222 | 0.341992 | 0.463506 | 0.339948 |
| Si | Si223 | 0.202164 | 0.964740 | 0.842382 |
| Si | Si224 | 0.699165 | 0.969621 | 0.644084 |
| Si | Si225 | 0.839684 | 0.464737 | 0.169041 |
| Si | Si226 | 0.712431 | 0.520905 | 0.693445 |
| Si | Si227 | 0.848436 | 0.026940 | 0.148045 |
| Si | Si228 | 0.300341 | 0.049591 | 0.556995 |
| Si | Si229 | 0.243877 | 0.549105 | 0.067831 |
| Si | Si230 | 0.300402 | 0.440283 | 0.556624 |
| Si | Si231 | 0.244953 | 0.942399 | 0.059803 |
| Si | Si232 | 0.802357 | 0.422780 | 0.957103 |
| Si | Si233 | 0.747579 | 0.560243 | 0.477420 |
| Si | Si234 | 0.794388 | 0.052635 | 0.942443 |
| Si | Si235 | 0.146178 | 0.058960 | 0.549423 |
| Si | Si236 | 0.401056 | 0.554644 | 0.052342 |

|    |       |          |          |          |
|----|-------|----------|----------|----------|
| Si | Si237 | 0.146515 | 0.435929 | 0.549808 |
| Si | Si238 | 0.399067 | 0.933159 | 0.047716 |
| Si | Si239 | 0.897926 | 0.933440 | 0.439179 |
| Si | Si240 | 0.646041 | 0.426049 | 0.976075 |
| Si | Si241 | 0.902996 | 0.572563 | 0.467259 |
| Si | Si242 | 0.642839 | 0.056121 | 0.949861 |
| Si | Si243 | 0.100204 | 0.030498 | 0.334376 |
| Si | Si244 | 0.444874 | 0.521311 | 0.834388 |
| Si | Si245 | 0.097088 | 0.466450 | 0.334615 |
| Si | Si246 | 0.447421 | 0.962343 | 0.831108 |
| Si | Si247 | 0.953003 | 0.960411 | 0.648409 |
| Si | Si248 | 0.599920 | 0.468301 | 0.185148 |
| Si | Si249 | 0.953469 | 0.528024 | 0.674226 |
| Si | Si250 | 0.599187 | 0.024481 | 0.161049 |
| Si | Si251 | 0.223788 | 0.065259 | 0.210517 |
| Si | Si252 | 0.324226 | 0.562465 | 0.708721 |
| Si | Si253 | 0.219061 | 0.424201 | 0.213993 |
| Si | Si254 | 0.321270 | 0.926118 | 0.708194 |
| Si | Si255 | 0.720994 | 0.443261 | 0.320463 |
| Si | Si256 | 0.835363 | 0.548843 | 0.825138 |
| Si | Si257 | 0.724970 | 0.062665 | 0.280065 |
| Si | Si258 | 0.449838 | 0.823602 | 0.186184 |
| Si | Si259 | 0.098926 | 0.325672 | 0.698585 |
| Si | Si260 | 0.453381 | 0.666766 | 0.197231 |
| Si | Si261 | 0.096266 | 0.168249 | 0.695629 |
| Si | Si262 | 0.595645 | 0.166457 | 0.801200 |
| Si | Si263 | 0.953760 | 0.671433 | 0.309235 |
| Si | Si264 | 0.597942 | 0.324632 | 0.818214 |
| Si | Si265 | 0.953103 | 0.829713 | 0.286455 |
| Si | Si266 | 0.344722 | 0.866233 | 0.335845 |
| Si | Si267 | 0.212183 | 0.367676 | 0.839920 |
| Si | Si268 | 0.342627 | 0.621791 | 0.337249 |
| Si | Si269 | 0.205260 | 0.123444 | 0.837132 |
| Si | Si270 | 0.707216 | 0.127651 | 0.653190 |
| Si | Si271 | 0.839321 | 0.621987 | 0.176064 |
| Si | Si272 | 0.713659 | 0.362718 | 0.672785 |
| Si | Si273 | 0.848208 | 0.865706 | 0.136574 |
| Si | Si274 | 0.297165 | 0.822994 | 0.540840 |
| Si | Si275 | 0.257054 | 0.324809 | 0.051002 |
| Si | Si276 | 0.295495 | 0.664328 | 0.545750 |
| Si | Si277 | 0.256776 | 0.165151 | 0.044526 |
| Si | Si278 | 0.751902 | 0.168641 | 0.443516 |
| Si | Si279 | 0.793849 | 0.663767 | 0.965140 |
| Si | Si280 | 0.750903 | 0.325815 | 0.457704 |

|    |       |          |          |          |
|----|-------|----------|----------|----------|
| Si | Si281 | 0.795720 | 0.817384 | 0.934511 |
| Si | Si282 | 0.145196 | 0.823470 | 0.536368 |
| Si | Si283 | 0.409639 | 0.319770 | 0.046851 |
| Si | Si284 | 0.141978 | 0.666553 | 0.545924 |
| Si | Si285 | 0.408895 | 0.163892 | 0.042165 |
| Si | Si286 | 0.905673 | 0.172282 | 0.449505 |
| Si | Si287 | 0.639507 | 0.667902 | 0.958169 |
| Si | Si288 | 0.904797 | 0.325171 | 0.469664 |
| Si | Si289 | 0.642206 | 0.822269 | 0.941128 |
| Si | Si290 | 0.099066 | 0.872167 | 0.328620 |
| Si | Si291 | 0.450879 | 0.364130 | 0.831742 |
| Si | Si292 | 0.098230 | 0.623504 | 0.334186 |
| Si | Si293 | 0.450835 | 0.122720 | 0.827426 |
| Si | Si294 | 0.954167 | 0.117831 | 0.655279 |
| Si | Si295 | 0.599308 | 0.625579 | 0.173444 |
| Si | Si296 | 0.952689 | 0.369812 | 0.678828 |
| Si | Si297 | 0.597862 | 0.865750 | 0.152489 |
| Si | Si298 | 0.222461 | 0.821518 | 0.204600 |
| Si | Si299 | 0.330800 | 0.320406 | 0.701815 |
| Si | Si300 | 0.219572 | 0.670906 | 0.209011 |
| Si | Si301 | 0.326108 | 0.169294 | 0.701915 |
| Si | Si302 | 0.829946 | 0.161929 | 0.783328 |
| Si | Si303 | 0.833364 | 0.315538 | 0.802692 |
| Zn | Zn304 | 0.759371 | 0.821418 | 0.700175 |
| Zn | Zn305 | 0.689736 | 0.784913 | 0.478197 |

**C<sub>4</sub>H<sub>8</sub>-Phys.Ads-H<sub>2</sub>-Phys.Ads-ZnOZn<sup>2+</sup> (Fig. 4/M3)** Total energy = -1930.47936236 eV

data\_

\_audit\_creation\_method 'Materials Studio'

\_cell\_length\_a 20.357621

\_cell\_length\_b 20.050598

\_cell\_length\_c 13.476578

\_cell\_angle\_alpha 90.000000

\_cell\_angle\_beta 90.000000

\_cell\_angle\_gamma 90.000000

\_symmetry\_space\_group\_name\_H-M 'P1'

loop\_

\_atom\_site\_type\_symbol

\_atom\_site\_label

\_atom\_site\_fract\_x

\_atom\_site\_fract\_y

\_atom\_site\_fract\_z

|   |    |          |          |          |
|---|----|----------|----------|----------|
| H | H1 | 0.591288 | 0.714017 | 0.400671 |
|---|----|----------|----------|----------|

|   |     |          |          |          |
|---|-----|----------|----------|----------|
| H | H2  | 0.705735 | 0.688550 | 0.699015 |
| H | H3  | 0.593710 | 0.804647 | 0.374048 |
| H | H4  | 0.551686 | 0.828944 | 0.539309 |
| H | H5  | 0.692429 | 0.669262 | 0.741085 |
| H | H6  | 0.560646 | 0.677522 | 0.573651 |
| H | H7  | 0.483378 | 0.716294 | 0.567158 |
| H | H8  | 0.589806 | 0.753651 | 0.718985 |
| H | H9  | 0.518983 | 0.705601 | 0.743811 |
| H | H10 | 0.511027 | 0.790675 | 0.710310 |
| C | C11 | 0.587392 | 0.764911 | 0.427785 |
| C | C12 | 0.559774 | 0.777145 | 0.517301 |
| C | C13 | 0.535228 | 0.724906 | 0.587305 |
| C | C14 | 0.539066 | 0.744966 | 0.696642 |
| O | O15 | 0.527809 | 0.042852 | 0.211873 |
| O | O16 | 0.022359 | 0.550746 | 0.714736 |
| O | O17 | 0.526598 | 0.446883 | 0.215009 |
| O | O18 | 0.020026 | 0.934885 | 0.691425 |
| O | O19 | 0.519502 | 0.941813 | 0.790858 |
| O | O20 | 0.023955 | 0.456909 | 0.294894 |
| O | O21 | 0.518314 | 0.539866 | 0.792794 |
| O | O22 | 0.026117 | 0.042732 | 0.291635 |
| O | O23 | 0.410420 | 0.057048 | 0.291047 |
| O | O24 | 0.137201 | 0.552391 | 0.799120 |
| O | O25 | 0.408354 | 0.432472 | 0.291506 |
| O | O26 | 0.132395 | 0.940575 | 0.791372 |
| O | O27 | 0.627814 | 0.952069 | 0.688758 |
| O | O28 | 0.904635 | 0.440930 | 0.224331 |
| O | O29 | 0.638991 | 0.532795 | 0.732967 |
| O | O30 | 0.914730 | 0.056422 | 0.199010 |
| O | O31 | 0.440759 | 0.123501 | 0.127617 |
| O | O32 | 0.116594 | 0.629600 | 0.643519 |
| O | O33 | 0.443814 | 0.360972 | 0.134274 |
| O | O34 | 0.122882 | 0.867606 | 0.629672 |
| O | O35 | 0.623747 | 0.867455 | 0.837976 |
| O | O36 | 0.941040 | 0.378476 | 0.388809 |
| O | O37 | 0.604446 | 0.620990 | 0.873037 |
| O | O38 | 0.938981 | 0.129308 | 0.361426 |
| O | O39 | 0.424043 | 0.992323 | 0.120493 |
| O | O40 | 0.124870 | 0.498985 | 0.619192 |
| O | O41 | 0.422252 | 0.489937 | 0.115006 |
| O | O42 | 0.122379 | 0.999479 | 0.616308 |
| O | O43 | 0.626003 | 0.998002 | 0.873792 |
| O | O44 | 0.920872 | 0.509923 | 0.389610 |
| O | O45 | 0.608226 | 0.491601 | 0.915546 |

|   |     |          |          |          |
|---|-----|----------|----------|----------|
| 0 | 046 | 0.915612 | 0.000228 | 0.377215 |
| 0 | 047 | 0.345164 | 0.038909 | 0.457685 |
| 0 | 048 | 0.204566 | 0.541193 | 0.963106 |
| 0 | 049 | 0.345788 | 0.454671 | 0.460009 |
| 0 | 050 | 0.199277 | 0.952507 | 0.957478 |
| 0 | 051 | 0.694869 | 0.954469 | 0.523369 |
| 0 | 052 | 0.835992 | 0.424055 | 0.061038 |
| 0 | 053 | 0.711047 | 0.555604 | 0.575915 |
| 0 | 054 | 0.845773 | 0.057062 | 0.032514 |
| 0 | 055 | 0.338412 | 0.948412 | 0.312288 |
| 0 | 056 | 0.216483 | 0.448811 | 0.820150 |
| 0 | 057 | 0.340773 | 0.543910 | 0.312038 |
| 0 | 058 | 0.210088 | 0.045282 | 0.815125 |
| 0 | 059 | 0.713650 | 0.050766 | 0.661399 |
| 0 | 060 | 0.846569 | 0.545175 | 0.137488 |
| 0 | 061 | 0.724863 | 0.441244 | 0.671330 |
| 0 | 062 | 0.846209 | 0.948741 | 0.146794 |
| 0 | 063 | 0.279361 | 0.063624 | 0.291862 |
| 0 | 064 | 0.267120 | 0.567660 | 0.794729 |
| 0 | 065 | 0.277157 | 0.429277 | 0.297936 |
| 0 | 066 | 0.263367 | 0.927475 | 0.789547 |
| 0 | 067 | 0.756984 | 0.928931 | 0.690965 |
| 0 | 068 | 0.774355 | 0.454204 | 0.227481 |
| 0 | 069 | 0.766150 | 0.551989 | 0.754746 |
| 0 | 070 | 0.785479 | 0.060147 | 0.202959 |
| 0 | 071 | 0.320739 | 0.121520 | 0.605210 |
| 0 | 072 | 0.220080 | 0.618879 | 0.118698 |
| 0 | 073 | 0.322261 | 0.374274 | 0.611025 |
| 0 | 074 | 0.229003 | 0.871694 | 0.106358 |
| 0 | 075 | 0.719799 | 0.865249 | 0.383602 |
| 0 | 076 | 0.811211 | 0.352120 | 0.900877 |
| 0 | 077 | 0.712672 | 0.623679 | 0.412341 |
| 0 | 078 | 0.806733 | 0.125600 | 0.878949 |
| 0 | 079 | 0.223803 | 0.051749 | 0.523398 |
| 0 | 080 | 0.322995 | 0.556995 | 0.038547 |
| 0 | 081 | 0.224422 | 0.442026 | 0.525638 |
| 0 | 082 | 0.320888 | 0.947311 | 0.022327 |
| 0 | 083 | 0.817588 | 0.936869 | 0.462069 |
| 0 | 084 | 0.724130 | 0.442131 | 0.962607 |
| 0 | 085 | 0.825084 | 0.573623 | 0.484470 |
| 0 | 086 | 0.718334 | 0.058507 | 0.983528 |
| 0 | 087 | 0.314004 | 0.991611 | 0.634768 |
| 0 | 088 | 0.232012 | 0.488282 | 0.136634 |
| 0 | 089 | 0.312856 | 0.504611 | 0.635061 |

|   |      |          |          |          |
|---|------|----------|----------|----------|
| 0 | 090  | 0.227930 | 0.001713 | 0.134956 |
| 0 | 091  | 0.727217 | 0.994061 | 0.344542 |
| 0 | 092  | 0.836635 | 0.481348 | 0.883776 |
| 0 | 093  | 0.736382 | 0.493256 | 0.406851 |
| 0 | 094  | 0.802382 | 0.992256 | 0.873915 |
| 0 | 095  | 0.132933 | 0.131253 | 0.602115 |
| 0 | 096  | 0.426229 | 0.622707 | 0.108047 |
| 0 | 097  | 0.130009 | 0.366944 | 0.601474 |
| 0 | 098  | 0.408763 | 0.861962 | 0.094588 |
| 0 | 099  | 0.909623 | 0.867394 | 0.367975 |
| 0 | 0100 | 0.627142 | 0.360053 | 0.911007 |
| 0 | 0101 | 0.922924 | 0.642102 | 0.402909 |
| 0 | 0102 | 0.627344 | 0.129879 | 0.892186 |
| 0 | 0103 | 0.105129 | 0.060180 | 0.443954 |
| 0 | 0104 | 0.437770 | 0.553480 | 0.945293 |
| 0 | 0105 | 0.105588 | 0.441976 | 0.445130 |
| 0 | 0106 | 0.439512 | 0.939402 | 0.942955 |
| 0 | 0107 | 0.937953 | 0.926417 | 0.537932 |
| 0 | 0108 | 0.621700 | 0.424885 | 0.082713 |
| 0 | 0109 | 0.943270 | 0.570156 | 0.563040 |
| 0 | 0110 | 0.594617 | 0.053608 | 0.044615 |
| 0 | 0111 | 0.150899 | 0.067954 | 0.259604 |
| 0 | 0112 | 0.395008 | 0.564155 | 0.759930 |
| 0 | 0113 | 0.148911 | 0.426848 | 0.259844 |
| 0 | 0114 | 0.392780 | 0.927304 | 0.759568 |
| 0 | 0115 | 0.894133 | 0.948794 | 0.721579 |
| 0 | 0116 | 0.648425 | 0.460121 | 0.270231 |
| 0 | 0117 | 0.895890 | 0.552803 | 0.745846 |
| 0 | 0118 | 0.655009 | 0.063815 | 0.218548 |
| 0 | 0119 | 0.117143 | 0.951246 | 0.333648 |
| 0 | 0120 | 0.429021 | 0.446115 | 0.830816 |
| 0 | 0121 | 0.118089 | 0.546379 | 0.324040 |
| 0 | 0122 | 0.437347 | 0.043684 | 0.821213 |
| 0 | 0123 | 0.960317 | 0.042411 | 0.621430 |
| 0 | 0124 | 0.597700 | 0.547542 | 0.144243 |
| 0 | 0125 | 0.948688 | 0.451489 | 0.644001 |
| 0 | 0126 | 0.611705 | 0.946687 | 0.158661 |
| 0 | 0127 | 0.231090 | 0.134212 | 0.145281 |
| 0 | 0128 | 0.319278 | 0.636592 | 0.648235 |
| 0 | 0129 | 0.229882 | 0.356467 | 0.150677 |
| 0 | 0130 | 0.315585 | 0.859106 | 0.642564 |
| 0 | 0131 | 0.810124 | 0.852077 | 0.819606 |
| 0 | 0132 | 0.722266 | 0.368294 | 0.355456 |
| 0 | 0133 | 0.834409 | 0.613699 | 0.892189 |

|   |      |          |          |          |
|---|------|----------|----------|----------|
| 0 | 0134 | 0.727440 | 0.127962 | 0.344385 |
| 0 | 0135 | 0.523455 | 0.852523 | 0.190071 |
| 0 | 0136 | 0.023528 | 0.353472 | 0.715060 |
| 0 | 0137 | 0.531625 | 0.650695 | 0.219628 |
| 0 | 0138 | 0.021541 | 0.144692 | 0.707161 |
| 0 | 0139 | 0.522504 | 0.139315 | 0.774881 |
| 0 | 0140 | 0.029177 | 0.641073 | 0.286479 |
| 0 | 0141 | 0.524921 | 0.359552 | 0.786946 |
| 0 | 0142 | 0.026755 | 0.862945 | 0.279166 |
| 0 | 0143 | 0.413309 | 0.840819 | 0.289408 |
| 0 | 0144 | 0.140876 | 0.341896 | 0.794921 |
| 0 | 0145 | 0.414675 | 0.653581 | 0.299179 |
| 0 | 0146 | 0.136140 | 0.154342 | 0.795850 |
| 0 | 0147 | 0.640195 | 0.158096 | 0.700142 |
| 0 | 0148 | 0.913566 | 0.649276 | 0.205997 |
| 0 | 0149 | 0.643138 | 0.342655 | 0.715760 |
| 0 | 0150 | 0.919792 | 0.841177 | 0.174517 |
| 0 | 0151 | 0.447705 | 0.745447 | 0.163451 |
| 0 | 0152 | 0.098384 | 0.248872 | 0.669414 |
| 0 | 0153 | 0.590563 | 0.247306 | 0.826728 |
| 0 | 0154 | 0.958729 | 0.752138 | 0.310803 |
| 0 | 0155 | 0.343775 | 0.854929 | 0.451163 |
| 0 | 0156 | 0.212690 | 0.354086 | 0.956544 |
| 0 | 0157 | 0.339744 | 0.634516 | 0.454885 |
| 0 | 0158 | 0.210747 | 0.139608 | 0.952558 |
| 0 | 0159 | 0.706383 | 0.150434 | 0.533110 |
| 0 | 0160 | 0.822083 | 0.666927 | 0.071648 |
| 0 | 0161 | 0.707656 | 0.339133 | 0.547391 |
| 0 | 0162 | 0.844722 | 0.850083 | 0.013919 |
| 0 | 0163 | 0.282592 | 0.832822 | 0.279188 |
| 0 | 0164 | 0.271385 | 0.332944 | 0.783663 |
| 0 | 0165 | 0.285721 | 0.660859 | 0.278687 |
| 0 | 0166 | 0.266089 | 0.160412 | 0.776689 |
| 0 | 0167 | 0.770929 | 0.166280 | 0.700536 |
| 0 | 0168 | 0.788948 | 0.633688 | 0.255314 |
| 0 | 0169 | 0.772862 | 0.323812 | 0.715976 |
| 0 | 0170 | 0.790568 | 0.833868 | 0.194197 |
| 0 | 0171 | 0.307437 | 0.746139 | 0.546969 |
| 0 | 0172 | 0.251302 | 0.245828 | 0.052058 |
| 0 | 0173 | 0.745813 | 0.248172 | 0.415054 |
| 0 | 0174 | 0.804295 | 0.740689 | 0.913722 |
| 0 | 0175 | 0.220619 | 0.841358 | 0.506999 |
| 0 | 0176 | 0.333440 | 0.347169 | 0.030068 |
| 0 | 0177 | 0.218965 | 0.648395 | 0.522250 |

|    |       |          |          |          |
|----|-------|----------|----------|----------|
| O  | O178  | 0.332385 | 0.143620 | 0.020298 |
| O  | O179  | 0.829046 | 0.151484 | 0.463477 |
| O  | O180  | 0.716407 | 0.647967 | 0.961821 |
| O  | O181  | 0.826704 | 0.346665 | 0.470452 |
| O  | O182  | 0.720156 | 0.837519 | 0.963452 |
| O  | O183  | 0.136318 | 0.746820 | 0.564955 |
| O  | O184  | 0.412859 | 0.243434 | 0.065905 |
| O  | O185  | 0.911312 | 0.251621 | 0.417896 |
| O  | O186  | 0.632592 | 0.746385 | 0.911953 |
| O  | O187  | 0.099316 | 0.840819 | 0.438093 |
| O  | O188  | 0.448489 | 0.337911 | 0.940047 |
| O  | O189  | 0.098366 | 0.645642 | 0.450632 |
| O  | O190  | 0.449480 | 0.150870 | 0.935644 |
| O  | O191  | 0.943002 | 0.163714 | 0.554299 |
| O  | O192  | 0.604545 | 0.665659 | 0.059563 |
| O  | O193  | 0.937283 | 0.329686 | 0.571537 |
| O  | O194  | 0.596691 | 0.848996 | 0.028097 |
| O  | O195  | 0.153092 | 0.835535 | 0.258020 |
| O  | O196  | 0.400096 | 0.329000 | 0.755978 |
| O  | O197  | 0.156282 | 0.667307 | 0.276560 |
| O  | O198  | 0.395214 | 0.160249 | 0.756808 |
| O  | O199  | 0.894052 | 0.128521 | 0.731970 |
| O  | O200  | 0.660433 | 0.646444 | 0.235141 |
| O  | O201  | 0.897092 | 0.356974 | 0.755212 |
| O  | O202  | 0.649962 | 0.824454 | 0.205584 |
| O  | O203  | 0.224666 | 0.746651 | 0.161270 |
| O  | O204  | 0.323315 | 0.247110 | 0.657399 |
| O  | O205  | 0.849332 | 0.240461 | 0.811847 |
| O  | O206  | 0.726477 | 0.740871 | 0.332610 |
| O  | O207  | 0.740597 | 0.766911 | 0.596549 |
| Al | Al208 | 0.821304 | 0.938332 | 0.781373 |
| Al | Al209 | 0.723670 | 0.819549 | 0.268290 |
| Si | Si210 | 0.740912 | 0.938068 | 0.427446 |
| Si | Si211 | 0.722405 | 0.661683 | 0.306688 |
| Si | Si212 | 0.450796 | 0.054019 | 0.187131 |
| Si | Si213 | 0.100113 | 0.557802 | 0.693104 |
| Si | Si214 | 0.450274 | 0.432744 | 0.188881 |
| Si | Si215 | 0.098868 | 0.936017 | 0.681931 |
| Si | Si216 | 0.598667 | 0.940484 | 0.800106 |
| Si | Si217 | 0.947579 | 0.446737 | 0.325419 |
| Si | Si218 | 0.593619 | 0.546369 | 0.829437 |
| Si | Si219 | 0.948774 | 0.057289 | 0.307885 |
| Si | Si220 | 0.343335 | 0.027219 | 0.338798 |
| Si | Si221 | 0.206445 | 0.527414 | 0.845085 |



|    |       |          |          |          |
|----|-------|----------|----------|----------|
| Si | Si222 | 0.342914 | 0.464988 | 0.340792 |
| Si | Si223 | 0.201203 | 0.966326 | 0.838974 |
| Si | Si224 | 0.698263 | 0.972715 | 0.640506 |
| Si | Si225 | 0.840659 | 0.466122 | 0.163497 |
| Si | Si226 | 0.710355 | 0.520244 | 0.683679 |
| Si | Si227 | 0.848365 | 0.029501 | 0.145117 |
| Si | Si228 | 0.300616 | 0.050888 | 0.555829 |
| Si | Si229 | 0.245403 | 0.551367 | 0.064989 |
| Si | Si230 | 0.301174 | 0.443667 | 0.558562 |
| Si | Si231 | 0.244230 | 0.943309 | 0.055930 |
| Si | Si232 | 0.801956 | 0.424772 | 0.952246 |
| Si | Si233 | 0.747056 | 0.561268 | 0.469582 |
| Si | Si234 | 0.793877 | 0.057240 | 0.940752 |
| Si | Si235 | 0.146097 | 0.060580 | 0.546899 |
| Si | Si236 | 0.401954 | 0.555603 | 0.052395 |
| Si | Si237 | 0.146325 | 0.437542 | 0.548228 |
| Si | Si238 | 0.398143 | 0.935261 | 0.045301 |
| Si | Si239 | 0.895845 | 0.932690 | 0.436232 |
| Si | Si240 | 0.645520 | 0.429122 | 0.967751 |
| Si | Si241 | 0.902966 | 0.573564 | 0.459511 |
| Si | Si242 | 0.642243 | 0.059903 | 0.948323 |
| Si | Si243 | 0.099623 | 0.030382 | 0.332250 |
| Si | Si244 | 0.444869 | 0.525482 | 0.832957 |
| Si | Si245 | 0.099059 | 0.467770 | 0.331209 |
| Si | Si246 | 0.447087 | 0.963582 | 0.828769 |
| Si | Si247 | 0.951634 | 0.962953 | 0.645004 |
| Si | Si248 | 0.598779 | 0.469569 | 0.177630 |
| Si | Si249 | 0.951949 | 0.530927 | 0.667677 |
| Si | Si250 | 0.597353 | 0.026118 | 0.158470 |
| Si | Si251 | 0.222398 | 0.065933 | 0.207642 |
| Si | Si252 | 0.323260 | 0.567216 | 0.709257 |
| Si | Si253 | 0.221785 | 0.425840 | 0.211156 |
| Si | Si254 | 0.321278 | 0.927257 | 0.706635 |
| Si | Si255 | 0.720561 | 0.444164 | 0.314485 |
| Si | Si256 | 0.833292 | 0.549492 | 0.819025 |
| Si | Si257 | 0.723867 | 0.061207 | 0.277593 |
| Si | Si258 | 0.449025 | 0.825092 | 0.183735 |
| Si | Si259 | 0.097964 | 0.327531 | 0.695305 |
| Si | Si260 | 0.454982 | 0.668397 | 0.197206 |
| Si | Si261 | 0.096715 | 0.169814 | 0.693350 |
| Si | Si262 | 0.595224 | 0.168917 | 0.798522 |
| Si | Si263 | 0.956142 | 0.671890 | 0.302182 |
| Si | Si264 | 0.596511 | 0.327000 | 0.810419 |
| Si | Si265 | 0.953580 | 0.830612 | 0.282718 |

|    |       |          |          |          |
|----|-------|----------|----------|----------|
| Si | Si266 | 0.344325 | 0.869171 | 0.332694 |
| Si | Si267 | 0.210120 | 0.369214 | 0.838629 |
| Si | Si268 | 0.344857 | 0.623089 | 0.336257 |
| Si | Si269 | 0.205740 | 0.124851 | 0.834858 |
| Si | Si270 | 0.707535 | 0.131403 | 0.649650 |
| Si | Si271 | 0.842864 | 0.623421 | 0.167519 |
| Si | Si272 | 0.711930 | 0.361666 | 0.662776 |
| Si | Si273 | 0.848874 | 0.868121 | 0.133034 |
| Si | Si274 | 0.296430 | 0.825465 | 0.537505 |
| Si | Si275 | 0.256878 | 0.325701 | 0.047366 |
| Si | Si276 | 0.295713 | 0.666816 | 0.542984 |
| Si | Si277 | 0.256633 | 0.166076 | 0.042407 |
| Si | Si278 | 0.752576 | 0.169537 | 0.439127 |
| Si | Si279 | 0.794226 | 0.666679 | 0.959087 |
| Si | Si280 | 0.750747 | 0.325398 | 0.447826 |
| Si | Si281 | 0.795572 | 0.820323 | 0.930430 |
| Si | Si282 | 0.144350 | 0.824340 | 0.534474 |
| Si | Si283 | 0.409410 | 0.322334 | 0.042345 |
| Si | Si284 | 0.142548 | 0.667722 | 0.545312 |
| Si | Si285 | 0.408937 | 0.165238 | 0.037092 |
| Si | Si286 | 0.905781 | 0.173362 | 0.448832 |
| Si | Si287 | 0.639747 | 0.670285 | 0.951723 |
| Si | Si288 | 0.904166 | 0.326665 | 0.461895 |
| Si | Si289 | 0.642847 | 0.825111 | 0.937117 |
| Si | Si290 | 0.099115 | 0.872550 | 0.326772 |
| Si | Si291 | 0.450500 | 0.368148 | 0.828278 |
| Si | Si292 | 0.100408 | 0.624993 | 0.334044 |
| Si | Si293 | 0.450865 | 0.123387 | 0.822186 |
| Si | Si294 | 0.954190 | 0.119719 | 0.654209 |
| Si | Si295 | 0.598941 | 0.627230 | 0.165095 |
| Si | Si296 | 0.951745 | 0.372693 | 0.671430 |
| Si | Si297 | 0.596730 | 0.867294 | 0.146749 |
| Si | Si298 | 0.222237 | 0.822963 | 0.201453 |
| Si | Si299 | 0.329131 | 0.322009 | 0.701883 |
| Si | Si300 | 0.221788 | 0.672364 | 0.208451 |
| Si | Si301 | 0.326234 | 0.171248 | 0.699181 |
| Si | Si302 | 0.830588 | 0.164620 | 0.781034 |
| Si | Si303 | 0.832516 | 0.318462 | 0.795821 |
| Zn | Zn304 | 0.765061 | 0.825380 | 0.689847 |
| Zn | Zn305 | 0.701741 | 0.780916 | 0.475743 |

**TS-C<sub>4</sub>H<sub>9</sub>-HTransfer-Stepwise-ZnOZn<sup>2+</sup> (Fig. 4/TS3)** Total energy = -1929.37338476 eV  
data\_

```

_audit_creation_method    'Materials Studio'
_cell_length_a           20.357621
_cell_length_b           20.050598
_cell_length_c           13.476578
_cell_angle_alpha        90.000000
_cell_angle_beta         90.000000
_cell_angle_gamma        90.000000
_symmetry_space_group_name_H-M  'P1'
loop_
_atom_site_type_symbol
_atom_site_label
_atom_site_fract_x
_atom_site_fract_y
_atom_site_fract_z
  H    H1           0.732847           0.735353           0.616625
  H    H2           0.534617           0.844526           0.474782
  H    H3           0.558993           0.846470           0.606143
  H    H4           0.576795           0.727251           0.607479
  H    H5           0.638323           0.720550           0.489310
  H    H6           0.530197           0.722572           0.391399
  H    H7           0.473748           0.717946           0.489228
  H    H8           0.587972           0.618545           0.462882
  H    H9           0.505594           0.603474           0.427519
  H    H10          0.525588           0.614199           0.554274
  C    C11          0.562648           0.821787           0.534668
  C    C12          0.565996           0.749730           0.535483
  C    C13          0.524840           0.706214           0.468464
  C    C14          0.536856           0.631240           0.478866
  O    O15          0.524270           0.040764           0.216268
  O    O16          0.020067           0.552385           0.709088
  O    O17          0.527534           0.442689           0.214911
  O    O18          0.018979           0.936454           0.696358
  O    O19          0.519259           0.942426           0.797141
  O    O20          0.024579           0.452096           0.290315
  O    O21          0.516393           0.540665           0.784592
  O    O22          0.023475           0.036631           0.292707
  O    O23          0.405961           0.059260           0.290904
  O    O24          0.134709           0.553216           0.794877
  O    O25          0.408820           0.434041           0.291652
  O    O26          0.133013           0.937282           0.789959
  O    O27          0.628520           0.957247           0.700494
  O    O28          0.907405           0.430256           0.214686
  O    O29          0.635160           0.532310           0.716761
  O    O30          0.909110           0.063611           0.211760

```

|   |     |          |          |          |
|---|-----|----------|----------|----------|
| 0 | 031 | 0.441989 | 0.126058 | 0.130468 |
| 0 | 032 | 0.116107 | 0.625894 | 0.632891 |
| 0 | 033 | 0.439862 | 0.362963 | 0.131985 |
| 0 | 034 | 0.115554 | 0.860327 | 0.633292 |
| 0 | 035 | 0.623826 | 0.868208 | 0.844154 |
| 0 | 036 | 0.942100 | 0.373178 | 0.383813 |
| 0 | 037 | 0.606292 | 0.621577 | 0.857233 |
| 0 | 038 | 0.943399 | 0.121131 | 0.381317 |
| 0 | 039 | 0.420111 | 0.996029 | 0.119267 |
| 0 | 040 | 0.121965 | 0.494449 | 0.619151 |
| 0 | 041 | 0.426396 | 0.493807 | 0.117548 |
| 0 | 042 | 0.123649 | 0.990956 | 0.610719 |
| 0 | 043 | 0.624083 | 0.997407 | 0.887782 |
| 0 | 044 | 0.918217 | 0.504038 | 0.377254 |
| 0 | 045 | 0.609295 | 0.492526 | 0.902242 |
| 0 | 046 | 0.913122 | 0.992252 | 0.376906 |
| 0 | 047 | 0.342583 | 0.036774 | 0.457980 |
| 0 | 048 | 0.201566 | 0.540184 | 0.960004 |
| 0 | 049 | 0.343191 | 0.453976 | 0.458236 |
| 0 | 050 | 0.196937 | 0.950452 | 0.957262 |
| 0 | 051 | 0.695985 | 0.943708 | 0.537396 |
| 0 | 052 | 0.838530 | 0.421665 | 0.048482 |
| 0 | 053 | 0.706912 | 0.555823 | 0.559292 |
| 0 | 054 | 0.841481 | 0.069383 | 0.044799 |
| 0 | 055 | 0.339347 | 0.947217 | 0.310887 |
| 0 | 056 | 0.212461 | 0.448243 | 0.816680 |
| 0 | 057 | 0.338145 | 0.543744 | 0.311211 |
| 0 | 058 | 0.210012 | 0.042554 | 0.814328 |
| 0 | 059 | 0.716770 | 0.050944 | 0.654812 |
| 0 | 060 | 0.861046 | 0.539452 | 0.128171 |
| 0 | 061 | 0.720257 | 0.440216 | 0.654449 |
| 0 | 062 | 0.864016 | 0.952088 | 0.130809 |
| 0 | 063 | 0.274838 | 0.060167 | 0.293770 |
| 0 | 064 | 0.264454 | 0.566961 | 0.791961 |
| 0 | 065 | 0.277871 | 0.428154 | 0.293226 |
| 0 | 066 | 0.264097 | 0.924942 | 0.791818 |
| 0 | 067 | 0.756788 | 0.932010 | 0.707663 |
| 0 | 068 | 0.779049 | 0.453932 | 0.216261 |
| 0 | 069 | 0.762364 | 0.551365 | 0.737013 |
| 0 | 070 | 0.781015 | 0.039603 | 0.209900 |
| 0 | 071 | 0.321955 | 0.118999 | 0.607145 |
| 0 | 072 | 0.228055 | 0.619151 | 0.110990 |
| 0 | 073 | 0.323123 | 0.372981 | 0.609197 |
| 0 | 074 | 0.226025 | 0.871722 | 0.108449 |

|   |      |          |          |          |
|---|------|----------|----------|----------|
| 0 | 075  | 0.714102 | 0.854743 | 0.397634 |
| 0 | 076  | 0.804027 | 0.355565 | 0.887468 |
| 0 | 077  | 0.720050 | 0.623221 | 0.395551 |
| 0 | 078  | 0.802021 | 0.133170 | 0.885813 |
| 0 | 079  | 0.222305 | 0.053220 | 0.525964 |
| 0 | 080  | 0.322439 | 0.545228 | 0.029218 |
| 0 | 081  | 0.222369 | 0.437797 | 0.526216 |
| 0 | 082  | 0.317869 | 0.947378 | 0.023630 |
| 0 | 083  | 0.815616 | 0.928736 | 0.464182 |
| 0 | 084  | 0.722033 | 0.443836 | 0.965633 |
| 0 | 085  | 0.824783 | 0.565275 | 0.480445 |
| 0 | 086  | 0.715707 | 0.063809 | 0.990263 |
| 0 | 087  | 0.311346 | 0.988953 | 0.634690 |
| 0 | 088  | 0.227505 | 0.488318 | 0.135317 |
| 0 | 089  | 0.310056 | 0.503161 | 0.633286 |
| 0 | 090  | 0.223961 | 0.002173 | 0.133396 |
| 0 | 091  | 0.718860 | 0.985743 | 0.358123 |
| 0 | 092  | 0.829949 | 0.485440 | 0.876090 |
| 0 | 093  | 0.734876 | 0.490380 | 0.394059 |
| 0 | 094  | 0.804780 | 0.999737 | 0.886451 |
| 0 | 095  | 0.125711 | 0.123850 | 0.606457 |
| 0 | 096  | 0.416759 | 0.625110 | 0.096585 |
| 0 | 097  | 0.126473 | 0.362816 | 0.599058 |
| 0 | 098  | 0.406610 | 0.864622 | 0.098133 |
| 0 | 099  | 0.912720 | 0.859248 | 0.383321 |
| 0 | 0100 | 0.630265 | 0.361467 | 0.896013 |
| 0 | 0101 | 0.918848 | 0.636390 | 0.395030 |
| 0 | 0102 | 0.624265 | 0.130029 | 0.892194 |
| 0 | 0103 | 0.104273 | 0.056098 | 0.443008 |
| 0 | 0104 | 0.439034 | 0.549820 | 0.941429 |
| 0 | 0105 | 0.104199 | 0.438998 | 0.443515 |
| 0 | 0106 | 0.436397 | 0.940159 | 0.944441 |
| 0 | 0107 | 0.933975 | 0.927059 | 0.547095 |
| 0 | 0108 | 0.613032 | 0.422614 | 0.068608 |
| 0 | 0109 | 0.945216 | 0.563611 | 0.550732 |
| 0 | 0110 | 0.592662 | 0.060468 | 0.052647 |
| 0 | 0111 | 0.147146 | 0.068397 | 0.257808 |
| 0 | 0112 | 0.392142 | 0.563366 | 0.758118 |
| 0 | 0113 | 0.149580 | 0.422171 | 0.259755 |
| 0 | 0114 | 0.393098 | 0.927424 | 0.758992 |
| 0 | 0115 | 0.894062 | 0.950621 | 0.732412 |
| 0 | 0116 | 0.652135 | 0.454180 | 0.252833 |
| 0 | 0117 | 0.892204 | 0.546496 | 0.729996 |
| 0 | 0118 | 0.651914 | 0.056546 | 0.227894 |

|   |      |          |          |          |
|---|------|----------|----------|----------|
| 0 | 0119 | 0.118606 | 0.949006 | 0.328095 |
| 0 | 0120 | 0.429159 | 0.444919 | 0.822640 |
| 0 | 0121 | 0.117719 | 0.542307 | 0.320925 |
| 0 | 0122 | 0.435878 | 0.043909 | 0.821290 |
| 0 | 0123 | 0.957926 | 0.043654 | 0.627448 |
| 0 | 0124 | 0.594942 | 0.544081 | 0.137057 |
| 0 | 0125 | 0.955428 | 0.447767 | 0.637010 |
| 0 | 0126 | 0.605140 | 0.945610 | 0.148372 |
| 0 | 0127 | 0.230909 | 0.134319 | 0.147003 |
| 0 | 0128 | 0.316900 | 0.635184 | 0.644628 |
| 0 | 0129 | 0.231053 | 0.355784 | 0.146370 |
| 0 | 0130 | 0.316454 | 0.856593 | 0.644785 |
| 0 | 0131 | 0.810533 | 0.857418 | 0.836267 |
| 0 | 0132 | 0.727175 | 0.365026 | 0.340948 |
| 0 | 0133 | 0.831741 | 0.618057 | 0.865632 |
| 0 | 0134 | 0.730616 | 0.118893 | 0.346823 |
| 0 | 0135 | 0.520698 | 0.850663 | 0.194648 |
| 0 | 0136 | 0.020819 | 0.345570 | 0.714577 |
| 0 | 0137 | 0.526229 | 0.647333 | 0.203511 |
| 0 | 0138 | 0.018267 | 0.145090 | 0.717264 |
| 0 | 0139 | 0.520350 | 0.139871 | 0.773704 |
| 0 | 0140 | 0.025417 | 0.632921 | 0.280072 |
| 0 | 0141 | 0.523958 | 0.357333 | 0.780296 |
| 0 | 0142 | 0.024899 | 0.861691 | 0.281569 |
| 0 | 0143 | 0.409791 | 0.836362 | 0.290765 |
| 0 | 0144 | 0.138898 | 0.339897 | 0.792855 |
| 0 | 0145 | 0.410936 | 0.652840 | 0.289161 |
| 0 | 0146 | 0.134761 | 0.150628 | 0.799354 |
| 0 | 0147 | 0.638327 | 0.153395 | 0.698565 |
| 0 | 0148 | 0.909017 | 0.652936 | 0.200974 |
| 0 | 0149 | 0.640658 | 0.340028 | 0.701140 |
| 0 | 0150 | 0.914156 | 0.836637 | 0.188256 |
| 0 | 0151 | 0.444151 | 0.745765 | 0.156610 |
| 0 | 0152 | 0.099680 | 0.244196 | 0.669504 |
| 0 | 0153 | 0.591823 | 0.246897 | 0.820293 |
| 0 | 0154 | 0.963156 | 0.747235 | 0.314033 |
| 0 | 0155 | 0.340639 | 0.855297 | 0.452305 |
| 0 | 0156 | 0.211025 | 0.353319 | 0.953336 |
| 0 | 0157 | 0.342071 | 0.636179 | 0.452113 |
| 0 | 0158 | 0.212144 | 0.135614 | 0.953592 |
| 0 | 0159 | 0.705534 | 0.153333 | 0.532064 |
| 0 | 0160 | 0.828108 | 0.657483 | 0.053264 |
| 0 | 0161 | 0.706046 | 0.336463 | 0.532603 |
| 0 | 0162 | 0.841073 | 0.842220 | 0.029954 |

|   |      |          |          |          |
|---|------|----------|----------|----------|
| 0 | 0163 | 0.279091 | 0.833046 | 0.281309 |
| 0 | 0164 | 0.269378 | 0.333197 | 0.780094 |
| 0 | 0165 | 0.280463 | 0.659865 | 0.282226 |
| 0 | 0166 | 0.263788 | 0.158881 | 0.775482 |
| 0 | 0167 | 0.768839 | 0.166421 | 0.702059 |
| 0 | 0168 | 0.782400 | 0.617400 | 0.227604 |
| 0 | 0169 | 0.770901 | 0.324048 | 0.702077 |
| 0 | 0170 | 0.785728 | 0.860614 | 0.211075 |
| 0 | 0171 | 0.303229 | 0.745445 | 0.544883 |
| 0 | 0172 | 0.250189 | 0.244733 | 0.048220 |
| 0 | 0173 | 0.746115 | 0.243876 | 0.403234 |
| 0 | 0174 | 0.801009 | 0.741418 | 0.910317 |
| 0 | 0175 | 0.218333 | 0.844024 | 0.514199 |
| 0 | 0176 | 0.332605 | 0.345919 | 0.021867 |
| 0 | 0177 | 0.219172 | 0.644861 | 0.513879 |
| 0 | 0178 | 0.333075 | 0.143388 | 0.023485 |
| 0 | 0179 | 0.828668 | 0.149728 | 0.466520 |
| 0 | 0180 | 0.716728 | 0.644948 | 0.952700 |
| 0 | 0181 | 0.826972 | 0.341450 | 0.463391 |
| 0 | 0182 | 0.717386 | 0.835345 | 0.972115 |
| 0 | 0183 | 0.137427 | 0.743655 | 0.558384 |
| 0 | 0184 | 0.413327 | 0.244675 | 0.063403 |
| 0 | 0185 | 0.913137 | 0.246497 | 0.416533 |
| 0 | 0186 | 0.633931 | 0.744858 | 0.905411 |
| 0 | 0187 | 0.098577 | 0.841503 | 0.439115 |
| 0 | 0188 | 0.449909 | 0.339752 | 0.938032 |
| 0 | 0189 | 0.098958 | 0.645720 | 0.439554 |
| 0 | 0190 | 0.449740 | 0.149965 | 0.937183 |
| 0 | 0191 | 0.938254 | 0.166707 | 0.567064 |
| 0 | 0192 | 0.603910 | 0.660250 | 0.048248 |
| 0 | 0193 | 0.936461 | 0.326588 | 0.567516 |
| 0 | 0194 | 0.593300 | 0.840057 | 0.033119 |
| 0 | 0195 | 0.150231 | 0.830504 | 0.258018 |
| 0 | 0196 | 0.398380 | 0.326187 | 0.756480 |
| 0 | 0197 | 0.151441 | 0.661712 | 0.259333 |
| 0 | 0198 | 0.392958 | 0.161075 | 0.760487 |
| 0 | 0199 | 0.890769 | 0.126503 | 0.742283 |
| 0 | 0200 | 0.654572 | 0.644366 | 0.229781 |
| 0 | 0201 | 0.893660 | 0.360083 | 0.747454 |
| 0 | 0202 | 0.647914 | 0.827540 | 0.213395 |
| 0 | 0203 | 0.225080 | 0.745853 | 0.159471 |
| 0 | 0204 | 0.321286 | 0.245572 | 0.656478 |
| 0 | 0205 | 0.847317 | 0.243753 | 0.805772 |
| 0 | 0206 | 0.740631 | 0.735355 | 0.293730 |

|    |       |          |          |          |
|----|-------|----------|----------|----------|
| O  | O207  | 0.725056 | 0.782902 | 0.615256 |
| Al | Al208 | 0.822544 | 0.943895 | 0.796335 |
| Al | Al209 | 0.723104 | 0.818742 | 0.272516 |
| Si | Si210 | 0.737859 | 0.928694 | 0.436836 |
| Si | Si211 | 0.724298 | 0.658087 | 0.286003 |
| Si | Si212 | 0.448202 | 0.055556 | 0.188804 |
| Si | Si213 | 0.098289 | 0.556400 | 0.688006 |
| Si | Si214 | 0.450469 | 0.433384 | 0.188775 |
| Si | Si215 | 0.097398 | 0.931732 | 0.682402 |
| Si | Si216 | 0.598036 | 0.942034 | 0.809793 |
| Si | Si217 | 0.948019 | 0.440166 | 0.317399 |
| Si | Si218 | 0.592684 | 0.546624 | 0.816168 |
| Si | Si219 | 0.947303 | 0.053246 | 0.316235 |
| Si | Si220 | 0.340560 | 0.025993 | 0.338967 |
| Si | Si221 | 0.203384 | 0.526988 | 0.841691 |
| Si | Si222 | 0.342016 | 0.464878 | 0.339136 |
| Si | Si223 | 0.201068 | 0.963652 | 0.838826 |
| Si | Si224 | 0.698824 | 0.972762 | 0.649071 |
| Si | Si225 | 0.846297 | 0.461431 | 0.152816 |
| Si | Si226 | 0.706165 | 0.519322 | 0.666337 |
| Si | Si227 | 0.849026 | 0.030433 | 0.149522 |
| Si | Si228 | 0.299183 | 0.049319 | 0.557109 |
| Si | Si229 | 0.245244 | 0.548299 | 0.059798 |
| Si | Si230 | 0.299415 | 0.441758 | 0.557245 |
| Si | Si231 | 0.241240 | 0.942825 | 0.056606 |
| Si | Si232 | 0.798833 | 0.426571 | 0.944392 |
| Si | Si233 | 0.746910 | 0.558910 | 0.455033 |
| Si | Si234 | 0.791743 | 0.065511 | 0.950579 |
| Si | Si235 | 0.143959 | 0.056090 | 0.547118 |
| Si | Si236 | 0.400818 | 0.553397 | 0.046627 |
| Si | Si237 | 0.143998 | 0.433663 | 0.547277 |
| Si | Si238 | 0.395219 | 0.936964 | 0.046928 |
| Si | Si239 | 0.894509 | 0.927159 | 0.442737 |
| Si | Si240 | 0.643685 | 0.429637 | 0.957848 |
| Si | Si241 | 0.901774 | 0.566652 | 0.450050 |
| Si | Si242 | 0.639628 | 0.063068 | 0.955431 |
| Si | Si243 | 0.098223 | 0.027537 | 0.330621 |
| Si | Si244 | 0.443980 | 0.524384 | 0.827422 |
| Si | Si245 | 0.098960 | 0.463695 | 0.328950 |
| Si | Si246 | 0.445783 | 0.963908 | 0.830519 |
| Si | Si247 | 0.949916 | 0.964295 | 0.652511 |
| Si | Si248 | 0.597309 | 0.465943 | 0.168338 |
| Si | Si249 | 0.952534 | 0.527323 | 0.657829 |
| Si | Si250 | 0.593682 | 0.024880 | 0.161690 |



|    |       |          |          |          |
|----|-------|----------|----------|----------|
| Si | Si251 | 0.219356 | 0.065573 | 0.207638 |
| Si | Si252 | 0.320664 | 0.566192 | 0.706631 |
| Si | Si253 | 0.221468 | 0.424320 | 0.208217 |
| Si | Si254 | 0.321212 | 0.925387 | 0.707491 |
| Si | Si255 | 0.723726 | 0.441179 | 0.300312 |
| Si | Si256 | 0.829262 | 0.549240 | 0.802324 |
| Si | Si257 | 0.721016 | 0.050245 | 0.285455 |
| Si | Si258 | 0.446165 | 0.824342 | 0.184467 |
| Si | Si259 | 0.096272 | 0.323020 | 0.693947 |
| Si | Si260 | 0.449924 | 0.667817 | 0.185972 |
| Si | Si261 | 0.094243 | 0.165944 | 0.697849 |
| Si | Si262 | 0.593758 | 0.167835 | 0.796317 |
| Si | Si263 | 0.954205 | 0.667992 | 0.297390 |
| Si | Si264 | 0.596663 | 0.326183 | 0.799566 |
| Si | Si265 | 0.953408 | 0.826026 | 0.291456 |
| Si | Si266 | 0.342068 | 0.867979 | 0.333592 |
| Si | Si267 | 0.207840 | 0.368559 | 0.835505 |
| Si | Si268 | 0.342778 | 0.623108 | 0.333329 |
| Si | Si269 | 0.205265 | 0.121906 | 0.835811 |
| Si | Si270 | 0.706980 | 0.131450 | 0.647530 |
| Si | Si271 | 0.845059 | 0.616929 | 0.153797 |
| Si | Si272 | 0.709198 | 0.360145 | 0.647695 |
| Si | Si273 | 0.848763 | 0.872758 | 0.142974 |
| Si | Si274 | 0.294412 | 0.825183 | 0.539458 |
| Si | Si275 | 0.256366 | 0.324614 | 0.042547 |
| Si | Si276 | 0.294887 | 0.665772 | 0.538836 |
| Si | Si277 | 0.256782 | 0.164815 | 0.043109 |
| Si | Si278 | 0.752828 | 0.166561 | 0.436790 |
| Si | Si279 | 0.794274 | 0.664332 | 0.945939 |
| Si | Si280 | 0.751439 | 0.321572 | 0.435426 |
| Si | Si281 | 0.793311 | 0.819136 | 0.942107 |
| Si | Si282 | 0.142346 | 0.822510 | 0.535678 |
| Si | Si283 | 0.408883 | 0.323321 | 0.038524 |
| Si | Si284 | 0.142777 | 0.664911 | 0.535924 |
| Si | Si285 | 0.409533 | 0.165928 | 0.038450 |
| Si | Si286 | 0.905939 | 0.170472 | 0.457187 |
| Si | Si287 | 0.640045 | 0.667601 | 0.941829 |
| Si | Si288 | 0.904658 | 0.322255 | 0.457334 |
| Si | Si289 | 0.640743 | 0.822247 | 0.941082 |
| Si | Si290 | 0.098132 | 0.870664 | 0.326350 |
| Si | Si291 | 0.450288 | 0.366929 | 0.824287 |
| Si | Si292 | 0.098393 | 0.620783 | 0.324656 |
| Si | Si293 | 0.449444 | 0.123542 | 0.823213 |
| Si | Si294 | 0.951035 | 0.120280 | 0.663974 |

|    |       |          |          |          |
|----|-------|----------|----------|----------|
| Si | Si295 | 0.595883 | 0.624073 | 0.155790 |
| Si | Si296 | 0.951697 | 0.369593 | 0.666742 |
| Si | Si297 | 0.593671 | 0.865145 | 0.149858 |
| Si | Si298 | 0.220131 | 0.821475 | 0.201829 |
| Si | Si299 | 0.327952 | 0.320645 | 0.700338 |
| Si | Si300 | 0.221223 | 0.670552 | 0.202826 |
| Si | Si301 | 0.324867 | 0.170070 | 0.699776 |
| Si | Si302 | 0.827463 | 0.166879 | 0.784248 |
| Si | Si303 | 0.828735 | 0.320866 | 0.785259 |
| Zn | Zn304 | 0.760905 | 0.831759 | 0.716887 |
| Zn | Zn305 | 0.658414 | 0.802047 | 0.495635 |

**C<sub>4</sub>H<sub>8</sub>-Phys.Ads-ZnH-OH-ZnOZn<sup>2+</sup>(Fig. 4/M4)** Total energy = -1930.66256420 eV

data\_

\_audit\_creation\_method 'Materials Studio'

\_cell\_length\_a 20.357621

\_cell\_length\_b 20.050598

\_cell\_length\_c 13.476578

\_cell\_angle\_alpha 90.000000

\_cell\_angle\_beta 90.000000

\_cell\_angle\_gamma 90.000000

\_symmetry\_space\_group\_name\_H-M 'P1'

loop\_

\_atom\_site\_type\_symbol

\_atom\_site\_label

\_atom\_site\_fract\_x

\_atom\_site\_fract\_y

\_atom\_site\_fract\_z

|   |     |          |          |          |
|---|-----|----------|----------|----------|
| H | H1  | 0.810202 | 0.735191 | 0.597591 |
| H | H2  | 0.556035 | 0.697773 | 0.423233 |
| H | H3  | 0.524522 | 0.776689 | 0.370478 |
| H | H4  | 0.464661 | 0.799892 | 0.522434 |
| H | H5  | 0.660088 | 0.730428 | 0.546794 |
| H | H6  | 0.529055 | 0.669346 | 0.596261 |
| H | H7  | 0.445849 | 0.688319 | 0.617658 |
| H | H8  | 0.561689 | 0.770755 | 0.696716 |
| H | H9  | 0.510556 | 0.717179 | 0.767045 |
| H | H10 | 0.477714 | 0.790850 | 0.713834 |
| C | C11 | 0.526367 | 0.742397 | 0.432581 |
| C | C12 | 0.493863 | 0.754417 | 0.516729 |
| C | C13 | 0.494574 | 0.710771 | 0.607286 |
| C | C14 | 0.512222 | 0.749657 | 0.701836 |
| O | O15 | 0.524186 | 0.040592 | 0.216924 |

|   |     |          |          |          |
|---|-----|----------|----------|----------|
| 0 | 016 | 0.018814 | 0.553834 | 0.705904 |
| 0 | 017 | 0.525592 | 0.446139 | 0.214348 |
| 0 | 018 | 0.019012 | 0.937564 | 0.699099 |
| 0 | 019 | 0.519506 | 0.946338 | 0.795510 |
| 0 | 020 | 0.022461 | 0.455455 | 0.290863 |
| 0 | 021 | 0.516341 | 0.542107 | 0.784664 |
| 0 | 022 | 0.024537 | 0.037730 | 0.291577 |
| 0 | 023 | 0.406061 | 0.059033 | 0.291233 |
| 0 | 024 | 0.133267 | 0.551280 | 0.793196 |
| 0 | 025 | 0.406260 | 0.433054 | 0.288697 |
| 0 | 026 | 0.133762 | 0.937754 | 0.789383 |
| 0 | 027 | 0.630490 | 0.956033 | 0.702878 |
| 0 | 028 | 0.905367 | 0.433766 | 0.214270 |
| 0 | 029 | 0.635196 | 0.526646 | 0.718092 |
| 0 | 030 | 0.909076 | 0.059738 | 0.211538 |
| 0 | 031 | 0.441744 | 0.125307 | 0.129926 |
| 0 | 032 | 0.116483 | 0.626880 | 0.634255 |
| 0 | 033 | 0.441528 | 0.363500 | 0.129489 |
| 0 | 034 | 0.114719 | 0.861930 | 0.631847 |
| 0 | 035 | 0.620192 | 0.868754 | 0.847540 |
| 0 | 036 | 0.940608 | 0.374213 | 0.381725 |
| 0 | 037 | 0.609993 | 0.621433 | 0.851391 |
| 0 | 038 | 0.943509 | 0.122525 | 0.377430 |
| 0 | 039 | 0.420284 | 0.994841 | 0.120780 |
| 0 | 040 | 0.119822 | 0.495582 | 0.614972 |
| 0 | 041 | 0.423363 | 0.493697 | 0.115483 |
| 0 | 042 | 0.122317 | 0.992919 | 0.611106 |
| 0 | 043 | 0.624488 | 0.998328 | 0.888908 |
| 0 | 044 | 0.914767 | 0.504691 | 0.378762 |
| 0 | 045 | 0.607500 | 0.493523 | 0.905220 |
| 0 | 046 | 0.916361 | 0.993145 | 0.380461 |
| 0 | 047 | 0.342638 | 0.037145 | 0.457970 |
| 0 | 048 | 0.200668 | 0.541057 | 0.957937 |
| 0 | 049 | 0.342137 | 0.453956 | 0.456347 |
| 0 | 050 | 0.197561 | 0.951799 | 0.956466 |
| 0 | 051 | 0.696031 | 0.941985 | 0.538816 |
| 0 | 052 | 0.837317 | 0.425313 | 0.048230 |
| 0 | 053 | 0.705331 | 0.553183 | 0.559598 |
| 0 | 054 | 0.841681 | 0.065519 | 0.045489 |
| 0 | 055 | 0.337000 | 0.948016 | 0.310413 |
| 0 | 056 | 0.213598 | 0.448542 | 0.815508 |
| 0 | 057 | 0.336845 | 0.543649 | 0.309210 |
| 0 | 058 | 0.210945 | 0.042952 | 0.812291 |
| 0 | 059 | 0.720728 | 0.047247 | 0.659177 |

|   |      |          |          |          |
|---|------|----------|----------|----------|
| 0 | 060  | 0.854566 | 0.543100 | 0.133075 |
| 0 | 061  | 0.725943 | 0.440114 | 0.657442 |
| 0 | 062  | 0.859786 | 0.948232 | 0.134389 |
| 0 | 063  | 0.275090 | 0.062029 | 0.293859 |
| 0 | 064  | 0.263026 | 0.567878 | 0.789077 |
| 0 | 065  | 0.275019 | 0.428850 | 0.292925 |
| 0 | 066  | 0.264525 | 0.924641 | 0.790961 |
| 0 | 067  | 0.759203 | 0.926579 | 0.706621 |
| 0 | 068  | 0.775915 | 0.453051 | 0.215889 |
| 0 | 069  | 0.761522 | 0.554609 | 0.737076 |
| 0 | 070  | 0.780375 | 0.039021 | 0.211123 |
| 0 | 071  | 0.322674 | 0.118550 | 0.608133 |
| 0 | 072  | 0.225142 | 0.619389 | 0.110535 |
| 0 | 073  | 0.321359 | 0.373002 | 0.606975 |
| 0 | 074  | 0.226667 | 0.872313 | 0.106810 |
| 0 | 075  | 0.722611 | 0.854902 | 0.399205 |
| 0 | 076  | 0.805136 | 0.354372 | 0.889692 |
| 0 | 077  | 0.709219 | 0.615485 | 0.390507 |
| 0 | 078  | 0.805716 | 0.132196 | 0.887886 |
| 0 | 079  | 0.222574 | 0.053156 | 0.526881 |
| 0 | 080  | 0.321260 | 0.548497 | 0.027251 |
| 0 | 081  | 0.221372 | 0.439102 | 0.525103 |
| 0 | 082  | 0.318412 | 0.948299 | 0.022051 |
| 0 | 083  | 0.817336 | 0.934207 | 0.468909 |
| 0 | 084  | 0.720592 | 0.442426 | 0.964070 |
| 0 | 085  | 0.820651 | 0.571009 | 0.474517 |
| 0 | 086  | 0.715747 | 0.065912 | 0.991059 |
| 0 | 087  | 0.311896 | 0.988412 | 0.634054 |
| 0 | 088  | 0.227693 | 0.488340 | 0.132361 |
| 0 | 089  | 0.310108 | 0.503261 | 0.631985 |
| 0 | 090  | 0.225098 | 0.002660 | 0.133427 |
| 0 | 091  | 0.718699 | 0.984738 | 0.359275 |
| 0 | 092  | 0.827719 | 0.483848 | 0.872579 |
| 0 | 093  | 0.735989 | 0.485607 | 0.396931 |
| 0 | 094  | 0.801758 | 0.998911 | 0.886330 |
| 0 | 095  | 0.126905 | 0.125802 | 0.605519 |
| 0 | 096  | 0.417537 | 0.625434 | 0.095844 |
| 0 | 097  | 0.126000 | 0.363721 | 0.598956 |
| 0 | 098  | 0.406673 | 0.863881 | 0.093509 |
| 0 | 099  | 0.910219 | 0.860529 | 0.381888 |
| 0 | 0100 | 0.626813 | 0.361717 | 0.897714 |
| 0 | 0101 | 0.918741 | 0.637471 | 0.394027 |
| 0 | 0102 | 0.623234 | 0.131174 | 0.894335 |
| 0 | 0103 | 0.104911 | 0.057798 | 0.442634 |

|   |      |          |          |          |
|---|------|----------|----------|----------|
| 0 | 0104 | 0.438355 | 0.550230 | 0.940497 |
| 0 | 0105 | 0.103747 | 0.437382 | 0.440879 |
| 0 | 0106 | 0.437414 | 0.942688 | 0.943832 |
| 0 | 0107 | 0.936074 | 0.925392 | 0.548228 |
| 0 | 0108 | 0.612858 | 0.423309 | 0.070912 |
| 0 | 0109 | 0.940111 | 0.565225 | 0.551237 |
| 0 | 0110 | 0.593027 | 0.061250 | 0.054254 |
| 0 | 0111 | 0.147679 | 0.068839 | 0.257005 |
| 0 | 0112 | 0.391363 | 0.563346 | 0.757742 |
| 0 | 0113 | 0.146938 | 0.424012 | 0.255122 |
| 0 | 0114 | 0.393625 | 0.927451 | 0.759171 |
| 0 | 0115 | 0.893584 | 0.953621 | 0.730828 |
| 0 | 0116 | 0.649832 | 0.451256 | 0.257470 |
| 0 | 0117 | 0.891455 | 0.547619 | 0.731462 |
| 0 | 0118 | 0.651478 | 0.056081 | 0.230254 |
| 0 | 0119 | 0.119181 | 0.949936 | 0.329963 |
| 0 | 0120 | 0.430038 | 0.445223 | 0.821675 |
| 0 | 0121 | 0.117710 | 0.543152 | 0.323206 |
| 0 | 0122 | 0.433887 | 0.045519 | 0.818950 |
| 0 | 0123 | 0.959143 | 0.043995 | 0.624357 |
| 0 | 0124 | 0.599411 | 0.544915 | 0.141958 |
| 0 | 0125 | 0.953568 | 0.448890 | 0.636326 |
| 0 | 0126 | 0.605320 | 0.945777 | 0.147357 |
| 0 | 0127 | 0.231093 | 0.134963 | 0.146218 |
| 0 | 0128 | 0.317111 | 0.635403 | 0.642899 |
| 0 | 0129 | 0.229711 | 0.355916 | 0.145577 |
| 0 | 0130 | 0.318192 | 0.856198 | 0.644027 |
| 0 | 0131 | 0.819308 | 0.856804 | 0.833988 |
| 0 | 0132 | 0.726956 | 0.361592 | 0.340532 |
| 0 | 0133 | 0.832347 | 0.616243 | 0.870706 |
| 0 | 0134 | 0.731261 | 0.118056 | 0.348648 |
| 0 | 0135 | 0.520069 | 0.851172 | 0.191192 |
| 0 | 0136 | 0.020227 | 0.347356 | 0.714242 |
| 0 | 0137 | 0.527196 | 0.647739 | 0.201705 |
| 0 | 0138 | 0.019194 | 0.144794 | 0.716516 |
| 0 | 0139 | 0.520475 | 0.140573 | 0.773369 |
| 0 | 0140 | 0.026457 | 0.634268 | 0.280701 |
| 0 | 0141 | 0.522877 | 0.355700 | 0.778057 |
| 0 | 0142 | 0.024114 | 0.864099 | 0.284301 |
| 0 | 0143 | 0.408307 | 0.838509 | 0.286798 |
| 0 | 0144 | 0.137953 | 0.341524 | 0.793163 |
| 0 | 0145 | 0.412283 | 0.650961 | 0.288762 |
| 0 | 0146 | 0.135509 | 0.151285 | 0.798754 |
| 0 | 0147 | 0.639252 | 0.148679 | 0.700123 |

|   |      |          |          |          |
|---|------|----------|----------|----------|
| 0 | 0148 | 0.911366 | 0.654490 | 0.199803 |
| 0 | 0149 | 0.640886 | 0.344025 | 0.702308 |
| 0 | 0150 | 0.915829 | 0.835129 | 0.187316 |
| 0 | 0151 | 0.443765 | 0.745697 | 0.157039 |
| 0 | 0152 | 0.098965 | 0.245424 | 0.670440 |
| 0 | 0153 | 0.594281 | 0.246893 | 0.815761 |
| 0 | 0154 | 0.963973 | 0.748448 | 0.316801 |
| 0 | 0155 | 0.340454 | 0.855580 | 0.450731 |
| 0 | 0156 | 0.211454 | 0.353987 | 0.952433 |
| 0 | 0157 | 0.340989 | 0.635851 | 0.450149 |
| 0 | 0158 | 0.212448 | 0.135126 | 0.952992 |
| 0 | 0159 | 0.707348 | 0.148732 | 0.534983 |
| 0 | 0160 | 0.827531 | 0.661673 | 0.055545 |
| 0 | 0161 | 0.706369 | 0.337537 | 0.534331 |
| 0 | 0162 | 0.843863 | 0.839553 | 0.026597 |
| 0 | 0163 | 0.277422 | 0.833354 | 0.281167 |
| 0 | 0164 | 0.268177 | 0.332562 | 0.778211 |
| 0 | 0165 | 0.282438 | 0.660949 | 0.277993 |
| 0 | 0166 | 0.264494 | 0.159695 | 0.775616 |
| 0 | 0167 | 0.769122 | 0.164825 | 0.705550 |
| 0 | 0168 | 0.784824 | 0.629752 | 0.235189 |
| 0 | 0169 | 0.770204 | 0.321705 | 0.704812 |
| 0 | 0170 | 0.786318 | 0.848305 | 0.205075 |
| 0 | 0171 | 0.302763 | 0.745644 | 0.543167 |
| 0 | 0172 | 0.249728 | 0.244991 | 0.046672 |
| 0 | 0173 | 0.745404 | 0.242239 | 0.408771 |
| 0 | 0174 | 0.801291 | 0.740537 | 0.905628 |
| 0 | 0175 | 0.218755 | 0.845336 | 0.515626 |
| 0 | 0176 | 0.332576 | 0.345929 | 0.023410 |
| 0 | 0177 | 0.218753 | 0.645230 | 0.513353 |
| 0 | 0178 | 0.333245 | 0.143953 | 0.022671 |
| 0 | 0179 | 0.830099 | 0.149241 | 0.467312 |
| 0 | 0180 | 0.717047 | 0.644807 | 0.955922 |
| 0 | 0181 | 0.826734 | 0.340970 | 0.464044 |
| 0 | 0182 | 0.720517 | 0.837625 | 0.964254 |
| 0 | 0183 | 0.138085 | 0.744635 | 0.560055 |
| 0 | 0184 | 0.413896 | 0.244674 | 0.063762 |
| 0 | 0185 | 0.913395 | 0.247165 | 0.415592 |
| 0 | 0186 | 0.636514 | 0.744891 | 0.904872 |
| 0 | 0187 | 0.099909 | 0.840833 | 0.437853 |
| 0 | 0188 | 0.448621 | 0.338911 | 0.935761 |
| 0 | 0189 | 0.098113 | 0.646849 | 0.441516 |
| 0 | 0190 | 0.450066 | 0.150260 | 0.936921 |
| 0 | 0191 | 0.940465 | 0.167049 | 0.564886 |

|    |       |          |          |          |
|----|-------|----------|----------|----------|
| O  | O192  | 0.600398 | 0.657507 | 0.041362 |
| O  | O193  | 0.937043 | 0.327729 | 0.566100 |
| O  | O194  | 0.598237 | 0.837488 | 0.036193 |
| O  | O195  | 0.148735 | 0.832299 | 0.254453 |
| O  | O196  | 0.397091 | 0.327359 | 0.754084 |
| O  | O197  | 0.152921 | 0.662628 | 0.263098 |
| O  | O198  | 0.393533 | 0.163764 | 0.760092 |
| O  | O199  | 0.891896 | 0.126430 | 0.740117 |
| O  | O200  | 0.656769 | 0.652337 | 0.218321 |
| O  | O201  | 0.892865 | 0.360004 | 0.746339 |
| O  | O202  | 0.646913 | 0.829345 | 0.219369 |
| O  | O203  | 0.223683 | 0.746473 | 0.158205 |
| O  | O204  | 0.320676 | 0.245760 | 0.654178 |
| O  | O205  | 0.848817 | 0.243044 | 0.806545 |
| O  | O206  | 0.730361 | 0.736518 | 0.323182 |
| O  | O207  | 0.793330 | 0.779690 | 0.585859 |
| Al | Al208 | 0.823020 | 0.944272 | 0.796846 |
| Al | Al209 | 0.722039 | 0.818964 | 0.275591 |
| Si | Si210 | 0.739881 | 0.929645 | 0.439866 |
| Si | Si211 | 0.720076 | 0.659577 | 0.290419 |
| Si | Si212 | 0.448139 | 0.055089 | 0.189085 |
| Si | Si213 | 0.097263 | 0.556688 | 0.686235 |
| Si | Si214 | 0.449035 | 0.434142 | 0.186892 |
| Si | Si215 | 0.097307 | 0.932999 | 0.682524 |
| Si | Si216 | 0.597955 | 0.942728 | 0.811141 |
| Si | Si217 | 0.945998 | 0.442139 | 0.317309 |
| Si | Si218 | 0.592870 | 0.546026 | 0.815723 |
| Si | Si219 | 0.948300 | 0.053257 | 0.315755 |
| Si | Si220 | 0.340187 | 0.026598 | 0.338974 |
| Si | Si221 | 0.202792 | 0.527155 | 0.839810 |
| Si | Si222 | 0.340168 | 0.464850 | 0.337226 |
| Si | Si223 | 0.201906 | 0.964154 | 0.837845 |
| Si | Si224 | 0.700895 | 0.969168 | 0.651368 |
| Si | Si225 | 0.843248 | 0.463927 | 0.153652 |
| Si | Si226 | 0.706808 | 0.518378 | 0.667804 |
| Si | Si227 | 0.847977 | 0.027329 | 0.150882 |
| Si | Si228 | 0.299565 | 0.049220 | 0.557440 |
| Si | Si229 | 0.244080 | 0.549399 | 0.058026 |
| Si | Si230 | 0.298537 | 0.442232 | 0.555583 |
| Si | Si231 | 0.241928 | 0.943673 | 0.055703 |
| Si | Si232 | 0.797656 | 0.426230 | 0.943859 |
| Si | Si233 | 0.743135 | 0.556219 | 0.454063 |
| Si | Si234 | 0.791696 | 0.064818 | 0.951527 |
| Si | Si235 | 0.144221 | 0.057390 | 0.547102 |

|    |       |          |          |          |
|----|-------|----------|----------|----------|
| Si | Si236 | 0.399763 | 0.554491 | 0.045278 |
| Si | Si237 | 0.143037 | 0.434051 | 0.545315 |
| Si | Si238 | 0.395665 | 0.937304 | 0.045546 |
| Si | Si239 | 0.895630 | 0.928204 | 0.444619 |
| Si | Si240 | 0.641870 | 0.429788 | 0.959006 |
| Si | Si241 | 0.898588 | 0.568562 | 0.448911 |
| Si | Si242 | 0.639517 | 0.064005 | 0.956568 |
| Si | Si243 | 0.098980 | 0.028549 | 0.330621 |
| Si | Si244 | 0.443865 | 0.524879 | 0.826591 |
| Si | Si245 | 0.097681 | 0.464704 | 0.327718 |
| Si | Si246 | 0.445828 | 0.965804 | 0.829430 |
| Si | Si247 | 0.950735 | 0.965152 | 0.652243 |
| Si | Si248 | 0.597026 | 0.466408 | 0.170853 |
| Si | Si249 | 0.950608 | 0.528406 | 0.657292 |
| Si | Si250 | 0.593650 | 0.024906 | 0.162608 |
| Si | Si251 | 0.219944 | 0.066327 | 0.207164 |
| Si | Si252 | 0.320243 | 0.566499 | 0.705143 |
| Si | Si253 | 0.219775 | 0.424994 | 0.206140 |
| Si | Si254 | 0.321982 | 0.925021 | 0.707033 |
| Si | Si255 | 0.722307 | 0.438045 | 0.301774 |
| Si | Si256 | 0.828161 | 0.549521 | 0.803007 |
| Si | Si257 | 0.720687 | 0.049666 | 0.287275 |
| Si | Si258 | 0.445499 | 0.824676 | 0.181799 |
| Si | Si259 | 0.095619 | 0.324347 | 0.694096 |
| Si | Si260 | 0.450539 | 0.667759 | 0.185923 |
| Si | Si261 | 0.094865 | 0.166912 | 0.697505 |
| Si | Si262 | 0.594333 | 0.167283 | 0.795943 |
| Si | Si263 | 0.955399 | 0.669344 | 0.297727 |
| Si | Si264 | 0.596185 | 0.326677 | 0.798721 |
| Si | Si265 | 0.953365 | 0.826983 | 0.292523 |
| Si | Si266 | 0.340806 | 0.868684 | 0.332015 |
| Si | Si267 | 0.207696 | 0.368987 | 0.834659 |
| Si | Si268 | 0.343233 | 0.622927 | 0.331540 |
| Si | Si269 | 0.205929 | 0.122187 | 0.835003 |
| Si | Si270 | 0.708692 | 0.127514 | 0.650730 |
| Si | Si271 | 0.844534 | 0.621823 | 0.156585 |
| Si | Si272 | 0.710515 | 0.360694 | 0.649663 |
| Si | Si273 | 0.849232 | 0.867898 | 0.140679 |
| Si | Si274 | 0.294910 | 0.825456 | 0.538690 |
| Si | Si275 | 0.256073 | 0.324888 | 0.042184 |
| Si | Si276 | 0.294730 | 0.665952 | 0.537186 |
| Si | Si277 | 0.256894 | 0.165117 | 0.042150 |
| Si | Si278 | 0.753659 | 0.164689 | 0.439761 |
| Si | Si279 | 0.794258 | 0.664799 | 0.947090 |



|    |       |          |          |          |
|----|-------|----------|----------|----------|
| Si | Si280 | 0.751229 | 0.320371 | 0.437446 |
| Si | Si281 | 0.796230 | 0.818659 | 0.936901 |
| Si | Si282 | 0.142827 | 0.823325 | 0.535817 |
| Si | Si283 | 0.409024 | 0.323202 | 0.037796 |
| Si | Si284 | 0.142837 | 0.665884 | 0.537089 |
| Si | Si285 | 0.409790 | 0.165960 | 0.038240 |
| Si | Si286 | 0.906984 | 0.170927 | 0.455715 |
| Si | Si287 | 0.640719 | 0.667269 | 0.938753 |
| Si | Si288 | 0.904557 | 0.322855 | 0.456401 |
| Si | Si289 | 0.643002 | 0.822358 | 0.940083 |
| Si | Si290 | 0.098261 | 0.871775 | 0.326288 |
| Si | Si291 | 0.449543 | 0.366807 | 0.822445 |
| Si | Si292 | 0.099030 | 0.621781 | 0.326702 |
| Si | Si293 | 0.449327 | 0.124799 | 0.822428 |
| Si | Si294 | 0.952254 | 0.120478 | 0.661987 |
| Si | Si295 | 0.596178 | 0.625412 | 0.151918 |
| Si | Si296 | 0.950961 | 0.370559 | 0.665981 |
| Si | Si297 | 0.594099 | 0.865263 | 0.150729 |
| Si | Si298 | 0.219245 | 0.822235 | 0.200186 |
| Si | Si299 | 0.326770 | 0.320863 | 0.698162 |
| Si | Si300 | 0.221197 | 0.671251 | 0.202263 |
| Si | Si301 | 0.325238 | 0.170783 | 0.699276 |
| Si | Si302 | 0.829115 | 0.166059 | 0.785297 |
| Si | Si303 | 0.829057 | 0.319937 | 0.786578 |
| Zn | Zn304 | 0.790333 | 0.830170 | 0.699440 |
| Zn | Zn305 | 0.706351 | 0.771656 | 0.483048 |

**ZnH-OH-ZnOZn<sup>2+</sup> (Fig. 4/M5)** Total energy = -1869.06417743 eV

data\_

\_audit\_creation\_method 'Materials Studio'

\_cell\_length\_a 20.357621

\_cell\_length\_b 20.050598

\_cell\_length\_c 13.476578

\_cell\_angle\_alpha 90.000000

\_cell\_angle\_beta 90.000000

\_cell\_angle\_gamma 90.000000

\_symmetry\_space\_group\_name\_H-M 'P1'

loop\_

\_atom\_site\_type\_symbol

\_atom\_site\_label

\_atom\_site\_fract\_x

\_atom\_site\_fract\_y

\_atom\_site\_fract\_z

|   |     |          |          |          |
|---|-----|----------|----------|----------|
| H | H1  | 0.740267 | 0.729084 | 0.624445 |
| H | H2  | 0.613246 | 0.745393 | 0.489926 |
| O | O3  | 0.524730 | 0.041791 | 0.216781 |
| O | O4  | 0.019725 | 0.552355 | 0.708226 |
| O | O5  | 0.526725 | 0.443374 | 0.213287 |
| O | O6  | 0.018791 | 0.936382 | 0.697358 |
| O | O7  | 0.519256 | 0.941074 | 0.797846 |
| O | O8  | 0.024432 | 0.453197 | 0.289484 |
| O | O9  | 0.516489 | 0.540746 | 0.785464 |
| O | O10 | 0.023667 | 0.036644 | 0.292555 |
| O | O11 | 0.406187 | 0.058625 | 0.291501 |
| O | O12 | 0.134080 | 0.551619 | 0.794890 |
| O | O13 | 0.408276 | 0.433024 | 0.290898 |
| O | O14 | 0.132981 | 0.937218 | 0.790334 |
| O | O15 | 0.628246 | 0.957792 | 0.700776 |
| O | O16 | 0.906639 | 0.431373 | 0.215270 |
| O | O17 | 0.635440 | 0.530035 | 0.717705 |
| O | O18 | 0.909107 | 0.063578 | 0.211393 |
| O | O19 | 0.441271 | 0.125238 | 0.130338 |
| O | O20 | 0.116439 | 0.626219 | 0.634850 |
| O | O21 | 0.440167 | 0.362250 | 0.131238 |
| O | O22 | 0.115390 | 0.860619 | 0.633290 |
| O | O23 | 0.625365 | 0.868637 | 0.843852 |
| O | O24 | 0.942929 | 0.373716 | 0.383563 |
| O | O25 | 0.607784 | 0.621245 | 0.855841 |
| O | O26 | 0.944088 | 0.122017 | 0.380149 |
| O | O27 | 0.421238 | 0.994655 | 0.120716 |
| O | O28 | 0.121476 | 0.494891 | 0.617367 |
| O | O29 | 0.424178 | 0.492640 | 0.116506 |
| O | O30 | 0.122956 | 0.991491 | 0.611444 |
| O | O31 | 0.622901 | 0.997829 | 0.888231 |
| O | O32 | 0.918104 | 0.504397 | 0.377807 |
| O | O33 | 0.609020 | 0.492499 | 0.903414 |
| O | O34 | 0.913089 | 0.993374 | 0.377371 |
| O | O35 | 0.342560 | 0.036554 | 0.458260 |
| O | O36 | 0.201453 | 0.539871 | 0.959569 |
| O | O37 | 0.343258 | 0.453651 | 0.457975 |
| O | O38 | 0.197216 | 0.951047 | 0.957341 |
| O | O39 | 0.694523 | 0.939225 | 0.537672 |
| O | O40 | 0.838107 | 0.423033 | 0.049481 |
| O | O41 | 0.707564 | 0.556443 | 0.561449 |
| O | O42 | 0.841230 | 0.067960 | 0.044633 |
| O | O43 | 0.338450 | 0.947107 | 0.311038 |
| O | O44 | 0.213153 | 0.447796 | 0.816445 |

|   |     |          |          |          |
|---|-----|----------|----------|----------|
| 0 | 045 | 0.338603 | 0.543420 | 0.310845 |
| 0 | 046 | 0.209660 | 0.042710 | 0.813582 |
| 0 | 047 | 0.717412 | 0.049236 | 0.649705 |
| 0 | 048 | 0.859533 | 0.541151 | 0.130181 |
| 0 | 049 | 0.723222 | 0.440700 | 0.654996 |
| 0 | 050 | 0.865222 | 0.951217 | 0.131220 |
| 0 | 051 | 0.275019 | 0.060496 | 0.293970 |
| 0 | 052 | 0.263752 | 0.566887 | 0.790929 |
| 0 | 053 | 0.277251 | 0.428226 | 0.293662 |
| 0 | 054 | 0.264018 | 0.924961 | 0.791897 |
| 0 | 055 | 0.756627 | 0.930472 | 0.706127 |
| 0 | 056 | 0.778126 | 0.455458 | 0.217018 |
| 0 | 057 | 0.762084 | 0.552745 | 0.739610 |
| 0 | 058 | 0.781324 | 0.037545 | 0.210529 |
| 0 | 059 | 0.321690 | 0.118674 | 0.607430 |
| 0 | 060 | 0.225607 | 0.618983 | 0.111246 |
| 0 | 061 | 0.322653 | 0.372275 | 0.608256 |
| 0 | 062 | 0.225946 | 0.871721 | 0.107980 |
| 0 | 063 | 0.718852 | 0.855651 | 0.394634 |
| 0 | 064 | 0.805125 | 0.354551 | 0.889277 |
| 0 | 065 | 0.716663 | 0.623608 | 0.397487 |
| 0 | 066 | 0.802632 | 0.132082 | 0.885516 |
| 0 | 067 | 0.222225 | 0.052498 | 0.526144 |
| 0 | 068 | 0.322102 | 0.548086 | 0.028962 |
| 0 | 069 | 0.222384 | 0.438031 | 0.526118 |
| 0 | 070 | 0.317966 | 0.948101 | 0.024901 |
| 0 | 071 | 0.816321 | 0.930907 | 0.467847 |
| 0 | 072 | 0.722052 | 0.443239 | 0.964714 |
| 0 | 073 | 0.823809 | 0.566899 | 0.477553 |
| 0 | 074 | 0.715694 | 0.063201 | 0.989729 |
| 0 | 075 | 0.311526 | 0.988743 | 0.634976 |
| 0 | 076 | 0.228671 | 0.488122 | 0.134439 |
| 0 | 077 | 0.310639 | 0.502415 | 0.633652 |
| 0 | 078 | 0.223427 | 0.002011 | 0.134248 |
| 0 | 079 | 0.719238 | 0.987460 | 0.361682 |
| 0 | 080 | 0.830252 | 0.484089 | 0.875102 |
| 0 | 081 | 0.733132 | 0.491018 | 0.394655 |
| 0 | 082 | 0.804284 | 0.998733 | 0.885574 |
| 0 | 083 | 0.126475 | 0.124407 | 0.606361 |
| 0 | 084 | 0.418359 | 0.624521 | 0.098668 |
| 0 | 085 | 0.126222 | 0.363164 | 0.598515 |
| 0 | 086 | 0.406081 | 0.863607 | 0.097126 |
| 0 | 087 | 0.910886 | 0.860477 | 0.380747 |
| 0 | 088 | 0.630093 | 0.361228 | 0.895540 |

|   |      |          |          |          |
|---|------|----------|----------|----------|
| 0 | 089  | 0.919476 | 0.636805 | 0.394430 |
| 0 | 090  | 0.625061 | 0.130497 | 0.891465 |
| 0 | 091  | 0.104017 | 0.056511 | 0.443504 |
| 0 | 092  | 0.439041 | 0.550177 | 0.942010 |
| 0 | 093  | 0.104611 | 0.438679 | 0.442031 |
| 0 | 094  | 0.436152 | 0.940442 | 0.944768 |
| 0 | 095  | 0.935810 | 0.926586 | 0.545750 |
| 0 | 096  | 0.613377 | 0.421892 | 0.068702 |
| 0 | 097  | 0.943657 | 0.564219 | 0.551087 |
| 0 | 098  | 0.593081 | 0.062455 | 0.053117 |
| 0 | 099  | 0.147258 | 0.068954 | 0.258461 |
| 0 | 0100 | 0.391753 | 0.563016 | 0.759182 |
| 0 | 0101 | 0.149200 | 0.422621 | 0.257593 |
| 0 | 0102 | 0.393017 | 0.927025 | 0.759410 |
| 0 | 0103 | 0.893299 | 0.950979 | 0.729635 |
| 0 | 0104 | 0.651172 | 0.453456 | 0.253165 |
| 0 | 0105 | 0.891912 | 0.547175 | 0.730564 |
| 0 | 0106 | 0.652404 | 0.055917 | 0.228535 |
| 0 | 0107 | 0.119026 | 0.949457 | 0.329044 |
| 0 | 0108 | 0.429650 | 0.444854 | 0.823655 |
| 0 | 0109 | 0.118146 | 0.542583 | 0.320586 |
| 0 | 0110 | 0.436935 | 0.043454 | 0.820160 |
| 0 | 0111 | 0.958469 | 0.043566 | 0.626134 |
| 0 | 0112 | 0.595665 | 0.543809 | 0.136035 |
| 0 | 0113 | 0.954189 | 0.448073 | 0.637096 |
| 0 | 0114 | 0.604407 | 0.946661 | 0.145295 |
| 0 | 0115 | 0.231201 | 0.134173 | 0.146897 |
| 0 | 0116 | 0.317031 | 0.634618 | 0.644196 |
| 0 | 0117 | 0.231492 | 0.355677 | 0.146050 |
| 0 | 0118 | 0.316432 | 0.856424 | 0.644733 |
| 0 | 0119 | 0.811874 | 0.856479 | 0.833004 |
| 0 | 0120 | 0.727655 | 0.365503 | 0.341204 |
| 0 | 0121 | 0.833167 | 0.616665 | 0.869939 |
| 0 | 0122 | 0.731884 | 0.119946 | 0.344926 |
| 0 | 0123 | 0.520578 | 0.851361 | 0.191958 |
| 0 | 0124 | 0.020984 | 0.346632 | 0.714842 |
| 0 | 0125 | 0.528075 | 0.647581 | 0.203985 |
| 0 | 0126 | 0.018806 | 0.144603 | 0.717008 |
| 0 | 0127 | 0.520873 | 0.140086 | 0.773436 |
| 0 | 0128 | 0.026807 | 0.634296 | 0.280384 |
| 0 | 0129 | 0.524027 | 0.356954 | 0.779585 |
| 0 | 0130 | 0.024645 | 0.863068 | 0.282851 |
| 0 | 0131 | 0.409626 | 0.836986 | 0.289865 |
| 0 | 0132 | 0.139138 | 0.339854 | 0.792348 |

|   |      |          |          |          |
|---|------|----------|----------|----------|
| 0 | 0133 | 0.413045 | 0.651872 | 0.291249 |
| 0 | 0134 | 0.135252 | 0.151543 | 0.799080 |
| 0 | 0135 | 0.638845 | 0.151179 | 0.697394 |
| 0 | 0136 | 0.911152 | 0.653962 | 0.200138 |
| 0 | 0137 | 0.640837 | 0.342240 | 0.700202 |
| 0 | 0138 | 0.915738 | 0.835529 | 0.186160 |
| 0 | 0139 | 0.444850 | 0.745332 | 0.158030 |
| 0 | 0140 | 0.098968 | 0.244619 | 0.669056 |
| 0 | 0141 | 0.593571 | 0.246887 | 0.816729 |
| 0 | 0142 | 0.963565 | 0.748135 | 0.315681 |
| 0 | 0143 | 0.340355 | 0.854899 | 0.451961 |
| 0 | 0144 | 0.211151 | 0.352910 | 0.953032 |
| 0 | 0145 | 0.341231 | 0.635859 | 0.451517 |
| 0 | 0146 | 0.211914 | 0.135230 | 0.953662 |
| 0 | 0147 | 0.706280 | 0.153250 | 0.530914 |
| 0 | 0148 | 0.827074 | 0.659494 | 0.056197 |
| 0 | 0149 | 0.707204 | 0.337124 | 0.533007 |
| 0 | 0150 | 0.843799 | 0.842648 | 0.025476 |
| 0 | 0151 | 0.278742 | 0.832789 | 0.281097 |
| 0 | 0152 | 0.269604 | 0.332589 | 0.779887 |
| 0 | 0153 | 0.283027 | 0.660046 | 0.278717 |
| 0 | 0154 | 0.264409 | 0.158854 | 0.776232 |
| 0 | 0155 | 0.769225 | 0.164358 | 0.701622 |
| 0 | 0156 | 0.785324 | 0.622185 | 0.234166 |
| 0 | 0157 | 0.770661 | 0.323527 | 0.703730 |
| 0 | 0158 | 0.787094 | 0.857019 | 0.205001 |
| 0 | 0159 | 0.302616 | 0.745188 | 0.545158 |
| 0 | 0160 | 0.250218 | 0.244439 | 0.048050 |
| 0 | 0161 | 0.746962 | 0.244480 | 0.403401 |
| 0 | 0162 | 0.802382 | 0.740760 | 0.908775 |
| 0 | 0163 | 0.218231 | 0.844038 | 0.514515 |
| 0 | 0164 | 0.332855 | 0.345254 | 0.021178 |
| 0 | 0165 | 0.218877 | 0.644755 | 0.514326 |
| 0 | 0166 | 0.333010 | 0.143068 | 0.022379 |
| 0 | 0167 | 0.829488 | 0.150061 | 0.465953 |
| 0 | 0168 | 0.717340 | 0.645116 | 0.953120 |
| 0 | 0169 | 0.827811 | 0.342162 | 0.463041 |
| 0 | 0170 | 0.719227 | 0.834977 | 0.970783 |
| 0 | 0171 | 0.137069 | 0.743702 | 0.558756 |
| 0 | 0172 | 0.413619 | 0.243969 | 0.062850 |
| 0 | 0173 | 0.913839 | 0.247045 | 0.416388 |
| 0 | 0174 | 0.635225 | 0.744860 | 0.904352 |
| 0 | 0175 | 0.098706 | 0.841470 | 0.439123 |
| 0 | 0176 | 0.450110 | 0.338831 | 0.937261 |

|    |       |          |          |          |
|----|-------|----------|----------|----------|
| O  | O177  | 0.098372 | 0.644720 | 0.441729 |
| O  | O178  | 0.450091 | 0.149033 | 0.937049 |
| O  | O179  | 0.938978 | 0.166778 | 0.566626 |
| O  | O180  | 0.603629 | 0.659961 | 0.046371 |
| O  | O181  | 0.937076 | 0.326863 | 0.567451 |
| O  | O182  | 0.594729 | 0.839931 | 0.031860 |
| O  | O183  | 0.149802 | 0.831134 | 0.257381 |
| O  | O184  | 0.398546 | 0.326594 | 0.755508 |
| O  | O185  | 0.153432 | 0.662528 | 0.263922 |
| O  | O186  | 0.393498 | 0.160619 | 0.760150 |
| O  | O187  | 0.891403 | 0.126031 | 0.741771 |
| O  | O188  | 0.657157 | 0.644013 | 0.225063 |
| O  | O189  | 0.893735 | 0.359301 | 0.747673 |
| O  | O190  | 0.648304 | 0.829964 | 0.212260 |
| O  | O191  | 0.224437 | 0.745935 | 0.159124 |
| O  | O192  | 0.321759 | 0.245159 | 0.656354 |
| O  | O193  | 0.847157 | 0.242832 | 0.805538 |
| O  | O194  | 0.735349 | 0.736993 | 0.303804 |
| O  | O195  | 0.740658 | 0.775832 | 0.606280 |
| Al | Al196 | 0.822432 | 0.943365 | 0.794987 |
| Al | Al197 | 0.723549 | 0.819980 | 0.269271 |
| Si | Si198 | 0.738955 | 0.929291 | 0.437993 |
| Si | Si199 | 0.723368 | 0.658998 | 0.288557 |
| Si | Si200 | 0.448344 | 0.055091 | 0.189359 |
| Si | Si201 | 0.098060 | 0.556130 | 0.687864 |
| Si | Si202 | 0.449689 | 0.432939 | 0.187816 |
| Si | Si203 | 0.097263 | 0.931859 | 0.682855 |
| Si | Si204 | 0.597997 | 0.941867 | 0.810126 |
| Si | Si205 | 0.948062 | 0.440896 | 0.317363 |
| Si | Si206 | 0.592852 | 0.546174 | 0.816415 |
| Si | Si207 | 0.947602 | 0.053788 | 0.315830 |
| Si | Si208 | 0.340456 | 0.025783 | 0.339248 |
| Si | Si209 | 0.203267 | 0.526457 | 0.841326 |
| Si | Si210 | 0.341905 | 0.464583 | 0.338864 |
| Si | Si211 | 0.201082 | 0.963840 | 0.838823 |
| Si | Si212 | 0.698347 | 0.971216 | 0.647969 |
| Si | Si213 | 0.845476 | 0.462799 | 0.153811 |
| Si | Si214 | 0.706950 | 0.519366 | 0.668065 |
| Si | Si215 | 0.849332 | 0.029447 | 0.149575 |
| Si | Si216 | 0.299135 | 0.048959 | 0.557322 |
| Si | Si217 | 0.244876 | 0.548856 | 0.059457 |
| Si | Si218 | 0.299501 | 0.441489 | 0.556976 |
| Si | Si219 | 0.241206 | 0.943085 | 0.056976 |
| Si | Si220 | 0.798979 | 0.426071 | 0.944741 |

|    |       |          |          |          |
|----|-------|----------|----------|----------|
| Si | Si221 | 0.745572 | 0.559392 | 0.455714 |
| Si | Si222 | 0.791676 | 0.064504 | 0.950145 |
| Si | Si223 | 0.143945 | 0.056243 | 0.547439 |
| Si | Si224 | 0.400620 | 0.553880 | 0.047037 |
| Si | Si225 | 0.143965 | 0.433835 | 0.546293 |
| Si | Si226 | 0.395272 | 0.936540 | 0.047455 |
| Si | Si227 | 0.894884 | 0.928036 | 0.442674 |
| Si | Si228 | 0.643600 | 0.429258 | 0.957710 |
| Si | Si229 | 0.901220 | 0.567393 | 0.449509 |
| Si | Si230 | 0.639508 | 0.063525 | 0.955237 |
| Si | Si231 | 0.098377 | 0.027915 | 0.331079 |
| Si | Si232 | 0.444041 | 0.524465 | 0.828145 |
| Si | Si233 | 0.099087 | 0.464022 | 0.327794 |
| Si | Si234 | 0.445919 | 0.963398 | 0.830646 |
| Si | Si235 | 0.950349 | 0.964272 | 0.651471 |
| Si | Si236 | 0.596999 | 0.465708 | 0.167727 |
| Si | Si237 | 0.951844 | 0.527671 | 0.657811 |
| Si | Si238 | 0.593783 | 0.025788 | 0.161387 |
| Si | Si239 | 0.219405 | 0.065695 | 0.208033 |
| Si | Si240 | 0.320660 | 0.565830 | 0.706571 |
| Si | Si241 | 0.221626 | 0.424366 | 0.207505 |
| Si | Si242 | 0.321222 | 0.925089 | 0.707638 |
| Si | Si243 | 0.722865 | 0.441598 | 0.300827 |
| Si | Si244 | 0.829489 | 0.549086 | 0.803860 |
| Si | Si245 | 0.721576 | 0.050458 | 0.285895 |
| Si | Si246 | 0.446179 | 0.824165 | 0.184007 |
| Si | Si247 | 0.096217 | 0.323476 | 0.693615 |
| Si | Si248 | 0.451482 | 0.667518 | 0.187922 |
| Si | Si249 | 0.094566 | 0.166339 | 0.697580 |
| Si | Si250 | 0.594575 | 0.167553 | 0.794898 |
| Si | Si251 | 0.955468 | 0.668862 | 0.297689 |
| Si | Si252 | 0.597021 | 0.326508 | 0.798209 |
| Si | Si253 | 0.953532 | 0.826640 | 0.291123 |
| Si | Si254 | 0.341771 | 0.867807 | 0.333301 |
| Si | Si255 | 0.208167 | 0.368174 | 0.835208 |
| Si | Si256 | 0.343961 | 0.622798 | 0.333000 |
| Si | Si257 | 0.205417 | 0.122034 | 0.835722 |
| Si | Si258 | 0.707544 | 0.129993 | 0.645822 |
| Si | Si259 | 0.845690 | 0.618992 | 0.156120 |
| Si | Si260 | 0.710184 | 0.360860 | 0.648077 |
| Si | Si261 | 0.850762 | 0.871550 | 0.139439 |
| Si | Si262 | 0.294336 | 0.824916 | 0.539423 |
| Si | Si263 | 0.256575 | 0.324296 | 0.042220 |
| Si | Si264 | 0.294781 | 0.665511 | 0.538744 |

|    |       |          |          |          |
|----|-------|----------|----------|----------|
| Si | Si265 | 0.256818 | 0.164543 | 0.042823 |
| Si | Si266 | 0.753732 | 0.167010 | 0.435974 |
| Si | Si267 | 0.794855 | 0.664373 | 0.947336 |
| Si | Si268 | 0.752259 | 0.322159 | 0.435578 |
| Si | Si269 | 0.794896 | 0.818751 | 0.939227 |
| Si | Si270 | 0.142301 | 0.822530 | 0.535918 |
| Si | Si271 | 0.409114 | 0.322606 | 0.037853 |
| Si | Si272 | 0.142691 | 0.664838 | 0.537237 |
| Si | Si273 | 0.409517 | 0.165234 | 0.037951 |
| Si | Si274 | 0.906739 | 0.170953 | 0.456725 |
| Si | Si275 | 0.640664 | 0.667559 | 0.940690 |
| Si | Si276 | 0.905463 | 0.322810 | 0.457150 |
| Si | Si277 | 0.642356 | 0.822210 | 0.940044 |
| Si | Si278 | 0.098278 | 0.871203 | 0.326754 |
| Si | Si279 | 0.450472 | 0.366813 | 0.823936 |
| Si | Si280 | 0.099296 | 0.621108 | 0.326259 |
| Si | Si281 | 0.450048 | 0.123124 | 0.822803 |
| Si | Si282 | 0.951627 | 0.120083 | 0.663344 |
| Si | Si283 | 0.596704 | 0.623869 | 0.154123 |
| Si | Si284 | 0.951614 | 0.369859 | 0.666978 |
| Si | Si285 | 0.593543 | 0.866134 | 0.147864 |
| Si | Si286 | 0.219813 | 0.821565 | 0.201481 |
| Si | Si287 | 0.328055 | 0.320371 | 0.699802 |
| Si | Si288 | 0.221753 | 0.670719 | 0.203102 |
| Si | Si289 | 0.325228 | 0.169764 | 0.699935 |
| Si | Si290 | 0.827814 | 0.165862 | 0.783854 |
| Si | Si291 | 0.828952 | 0.320174 | 0.786213 |
| Zn | Zn292 | 0.766086 | 0.830869 | 0.709165 |
| Zn | Zn293 | 0.676167 | 0.785506 | 0.479635 |

**TS-H<sub>2</sub>-Dis-ZnOZn<sup>2+</sup> (Fig. 4/TS4)** Total energy = -1867.77232936 eV

data\_

\_audit\_creation\_method 'Materials Studio'

\_cell\_length\_a 20.357621

\_cell\_length\_b 20.050598

\_cell\_length\_c 13.476578

\_cell\_angle\_alpha 90.000000

\_cell\_angle\_beta 90.000000

\_cell\_angle\_gamma 90.000000

\_symmetry\_space\_group\_name\_H-M 'P1'

loop\_

\_atom\_site\_type\_symbol

\_atom\_site\_label



\_atom\_site\_fract\_x  
\_atom\_site\_fract\_y  
\_atom\_site\_fract\_z

|   |     |          |          |          |
|---|-----|----------|----------|----------|
| H | H1  | 0.680502 | 0.745974 | 0.590109 |
| H | H2  | 0.646771 | 0.736606 | 0.541641 |
| O | O3  | 0.524681 | 0.040691 | 0.215276 |
| O | O4  | 0.019599 | 0.552424 | 0.708034 |
| O | O5  | 0.525842 | 0.446275 | 0.212304 |
| O | O6  | 0.018507 | 0.935860 | 0.696148 |
| O | O7  | 0.518877 | 0.940978 | 0.796528 |
| O | O8  | 0.023824 | 0.454114 | 0.289773 |
| O | O9  | 0.516199 | 0.540020 | 0.785932 |
| O | O10 | 0.024056 | 0.037244 | 0.291716 |
| O | O11 | 0.406654 | 0.058116 | 0.291354 |
| O | O12 | 0.133737 | 0.550673 | 0.794909 |
| O | O13 | 0.407775 | 0.432435 | 0.290263 |
| O | O14 | 0.132371 | 0.937413 | 0.790187 |
| O | O15 | 0.627587 | 0.956975 | 0.697956 |
| O | O16 | 0.905494 | 0.434189 | 0.216182 |
| O | O17 | 0.635444 | 0.529425 | 0.720021 |
| O | O18 | 0.910064 | 0.060768 | 0.207626 |
| O | O19 | 0.441168 | 0.124440 | 0.129574 |
| O | O20 | 0.116832 | 0.626504 | 0.636257 |
| O | O21 | 0.441524 | 0.362148 | 0.130864 |
| O | O22 | 0.115990 | 0.861212 | 0.632569 |
| O | O23 | 0.624676 | 0.868248 | 0.841728 |
| O | O24 | 0.942162 | 0.374056 | 0.382652 |
| O | O25 | 0.606579 | 0.621504 | 0.856557 |
| O | O26 | 0.942970 | 0.123470 | 0.374674 |
| O | O27 | 0.420611 | 0.993824 | 0.120785 |
| O | O28 | 0.121110 | 0.495291 | 0.616315 |
| O | O29 | 0.421741 | 0.491884 | 0.115588 |
| O | O30 | 0.122591 | 0.992304 | 0.611775 |
| O | O31 | 0.623062 | 0.997408 | 0.885441 |
| O | O32 | 0.917856 | 0.504891 | 0.380047 |
| O | O33 | 0.608323 | 0.493165 | 0.906045 |
| O | O34 | 0.913506 | 0.994682 | 0.377263 |
| O | O35 | 0.342693 | 0.036516 | 0.458038 |
| O | O36 | 0.201306 | 0.539940 | 0.959245 |
| O | O37 | 0.343309 | 0.453409 | 0.457763 |
| O | O38 | 0.196681 | 0.951131 | 0.957156 |
| O | O39 | 0.693810 | 0.945668 | 0.533164 |
| O | O40 | 0.837644 | 0.426093 | 0.050672 |
| O | O41 | 0.707731 | 0.554037 | 0.563710 |

|   |     |          |          |          |
|---|-----|----------|----------|----------|
| 0 | 042 | 0.842890 | 0.062884 | 0.039823 |
| 0 | 043 | 0.338123 | 0.947051 | 0.310989 |
| 0 | 044 | 0.213819 | 0.447691 | 0.816418 |
| 0 | 045 | 0.338971 | 0.543289 | 0.310753 |
| 0 | 046 | 0.209205 | 0.042813 | 0.813464 |
| 0 | 047 | 0.717504 | 0.049213 | 0.656716 |
| 0 | 048 | 0.853749 | 0.543939 | 0.136754 |
| 0 | 049 | 0.724519 | 0.440447 | 0.661217 |
| 0 | 050 | 0.858765 | 0.948459 | 0.137792 |
| 0 | 051 | 0.275537 | 0.060770 | 0.293420 |
| 0 | 052 | 0.263318 | 0.567054 | 0.790223 |
| 0 | 053 | 0.276610 | 0.428523 | 0.293941 |
| 0 | 054 | 0.263360 | 0.924950 | 0.791431 |
| 0 | 055 | 0.756021 | 0.928035 | 0.701416 |
| 0 | 056 | 0.775854 | 0.453783 | 0.218112 |
| 0 | 057 | 0.761919 | 0.553761 | 0.742707 |
| 0 | 058 | 0.780952 | 0.043893 | 0.206502 |
| 0 | 059 | 0.321327 | 0.118589 | 0.607043 |
| 0 | 060 | 0.223397 | 0.618858 | 0.111872 |
| 0 | 061 | 0.322078 | 0.372085 | 0.607984 |
| 0 | 062 | 0.226119 | 0.871802 | 0.107600 |
| 0 | 063 | 0.719970 | 0.859267 | 0.390962 |
| 0 | 064 | 0.807063 | 0.353830 | 0.892732 |
| 0 | 065 | 0.712546 | 0.620263 | 0.398932 |
| 0 | 066 | 0.803658 | 0.129556 | 0.883814 |
| 0 | 067 | 0.222143 | 0.052147 | 0.525201 |
| 0 | 068 | 0.321585 | 0.550979 | 0.028835 |
| 0 | 069 | 0.222307 | 0.438553 | 0.525521 |
| 0 | 070 | 0.317615 | 0.948286 | 0.023439 |
| 0 | 071 | 0.816289 | 0.932936 | 0.467345 |
| 0 | 072 | 0.722205 | 0.443209 | 0.962899 |
| 0 | 073 | 0.823116 | 0.569170 | 0.476202 |
| 0 | 074 | 0.716158 | 0.061737 | 0.988428 |
| 0 | 075 | 0.311213 | 0.988722 | 0.634693 |
| 0 | 076 | 0.229634 | 0.487985 | 0.133591 |
| 0 | 077 | 0.310736 | 0.502274 | 0.633455 |
| 0 | 078 | 0.223545 | 0.002038 | 0.134071 |
| 0 | 079 | 0.721378 | 0.988980 | 0.355655 |
| 0 | 080 | 0.831143 | 0.482873 | 0.873608 |
| 0 | 081 | 0.734379 | 0.489353 | 0.397059 |
| 0 | 082 | 0.802204 | 0.995987 | 0.881204 |
| 0 | 083 | 0.127454 | 0.125233 | 0.605739 |
| 0 | 084 | 0.420026 | 0.624053 | 0.099389 |
| 0 | 085 | 0.126574 | 0.363475 | 0.598330 |

|   |      |          |          |          |
|---|------|----------|----------|----------|
| 0 | 086  | 0.404857 | 0.863004 | 0.095865 |
| 0 | 087  | 0.909081 | 0.861817 | 0.377298 |
| 0 | 088  | 0.628442 | 0.361535 | 0.898912 |
| 0 | 089  | 0.919835 | 0.637420 | 0.394061 |
| 0 | 090  | 0.625444 | 0.130054 | 0.891724 |
| 0 | 091  | 0.103715 | 0.057037 | 0.443483 |
| 0 | 092  | 0.438707 | 0.550144 | 0.942146 |
| 0 | 093  | 0.104614 | 0.438569 | 0.441303 |
| 0 | 094  | 0.436295 | 0.940305 | 0.944461 |
| 0 | 095  | 0.936307 | 0.926047 | 0.543649 |
| 0 | 096  | 0.615130 | 0.423619 | 0.071665 |
| 0 | 097  | 0.942684 | 0.565398 | 0.552212 |
| 0 | 098  | 0.593127 | 0.060154 | 0.051250 |
| 0 | 099  | 0.147715 | 0.069093 | 0.258717 |
| 0 | 0100 | 0.391480 | 0.562725 | 0.759402 |
| 0 | 0101 | 0.148617 | 0.423503 | 0.256225 |
| 0 | 0102 | 0.392427 | 0.927239 | 0.759611 |
| 0 | 0103 | 0.892828 | 0.951058 | 0.727125 |
| 0 | 0104 | 0.649491 | 0.452784 | 0.258490 |
| 0 | 0105 | 0.891879 | 0.549055 | 0.731927 |
| 0 | 0106 | 0.651822 | 0.058395 | 0.227061 |
| 0 | 0107 | 0.119057 | 0.949808 | 0.329612 |
| 0 | 0108 | 0.428984 | 0.444522 | 0.824497 |
| 0 | 0109 | 0.118028 | 0.543025 | 0.320644 |
| 0 | 0110 | 0.436944 | 0.043513 | 0.820377 |
| 0 | 0111 | 0.958923 | 0.043071 | 0.624182 |
| 0 | 0112 | 0.599404 | 0.545577 | 0.141209 |
| 0 | 0113 | 0.952314 | 0.448836 | 0.638194 |
| 0 | 0114 | 0.606984 | 0.946186 | 0.149058 |
| 0 | 0115 | 0.231216 | 0.134220 | 0.146595 |
| 0 | 0116 | 0.317327 | 0.634455 | 0.643822 |
| 0 | 0117 | 0.231004 | 0.355635 | 0.146346 |
| 0 | 0118 | 0.316236 | 0.856508 | 0.644437 |
| 0 | 0119 | 0.812123 | 0.854725 | 0.828791 |
| 0 | 0120 | 0.726467 | 0.364180 | 0.344096 |
| 0 | 0121 | 0.833750 | 0.615146 | 0.875738 |
| 0 | 0122 | 0.730925 | 0.122156 | 0.344520 |
| 0 | 0123 | 0.519826 | 0.852404 | 0.189118 |
| 0 | 0124 | 0.021319 | 0.348198 | 0.714574 |
| 0 | 0125 | 0.528907 | 0.648521 | 0.205872 |
| 0 | 0126 | 0.019167 | 0.144139 | 0.715328 |
| 0 | 0127 | 0.521161 | 0.140058 | 0.773729 |
| 0 | 0128 | 0.027587 | 0.635627 | 0.280731 |
| 0 | 0129 | 0.523756 | 0.356980 | 0.780272 |

|   |      |          |          |          |
|---|------|----------|----------|----------|
| 0 | 0130 | 0.024406 | 0.864009 | 0.282920 |
| 0 | 0131 | 0.409493 | 0.837194 | 0.288932 |
| 0 | 0132 | 0.139279 | 0.340075 | 0.792304 |
| 0 | 0133 | 0.413676 | 0.651688 | 0.291845 |
| 0 | 0134 | 0.135404 | 0.152119 | 0.798484 |
| 0 | 0135 | 0.639155 | 0.152784 | 0.698096 |
| 0 | 0136 | 0.912482 | 0.654934 | 0.199506 |
| 0 | 0137 | 0.641130 | 0.342339 | 0.703744 |
| 0 | 0138 | 0.916740 | 0.834932 | 0.183463 |
| 0 | 0139 | 0.445092 | 0.745286 | 0.158105 |
| 0 | 0140 | 0.098376 | 0.245170 | 0.668962 |
| 0 | 0141 | 0.593019 | 0.246934 | 0.819517 |
| 0 | 0142 | 0.963378 | 0.749160 | 0.316457 |
| 0 | 0143 | 0.340638 | 0.854593 | 0.451579 |
| 0 | 0144 | 0.211518 | 0.353026 | 0.953140 |
| 0 | 0145 | 0.340896 | 0.635921 | 0.451010 |
| 0 | 0146 | 0.211671 | 0.135424 | 0.953450 |
| 0 | 0147 | 0.706583 | 0.150409 | 0.531968 |
| 0 | 0148 | 0.824807 | 0.661975 | 0.059173 |
| 0 | 0149 | 0.707677 | 0.338196 | 0.536969 |
| 0 | 0150 | 0.844834 | 0.843207 | 0.021243 |
| 0 | 0151 | 0.278517 | 0.832717 | 0.281001 |
| 0 | 0152 | 0.269668 | 0.332194 | 0.779991 |
| 0 | 0153 | 0.284066 | 0.660012 | 0.276739 |
| 0 | 0154 | 0.264744 | 0.158604 | 0.776447 |
| 0 | 0155 | 0.769528 | 0.165575 | 0.701717 |
| 0 | 0156 | 0.786895 | 0.632886 | 0.241180 |
| 0 | 0157 | 0.770736 | 0.322611 | 0.707891 |
| 0 | 0158 | 0.787189 | 0.844910 | 0.199721 |
| 0 | 0159 | 0.302866 | 0.745157 | 0.545249 |
| 0 | 0160 | 0.250228 | 0.244492 | 0.048015 |
| 0 | 0161 | 0.747135 | 0.244606 | 0.408890 |
| 0 | 0162 | 0.802045 | 0.740223 | 0.908445 |
| 0 | 0163 | 0.218415 | 0.843788 | 0.513499 |
| 0 | 0164 | 0.333014 | 0.345362 | 0.023023 |
| 0 | 0165 | 0.218787 | 0.644923 | 0.514637 |
| 0 | 0166 | 0.332886 | 0.143085 | 0.021924 |
| 0 | 0167 | 0.829757 | 0.149136 | 0.465747 |
| 0 | 0168 | 0.716607 | 0.644885 | 0.953682 |
| 0 | 0169 | 0.827788 | 0.343323 | 0.464884 |
| 0 | 0170 | 0.719699 | 0.835706 | 0.968272 |
| 0 | 0171 | 0.137035 | 0.743900 | 0.559044 |
| 0 | 0172 | 0.413587 | 0.243675 | 0.063887 |
| 0 | 0173 | 0.912794 | 0.247647 | 0.416355 |

|    |       |          |          |          |
|----|-------|----------|----------|----------|
| O  | O174  | 0.634890 | 0.745172 | 0.904878 |
| O  | O175  | 0.098759 | 0.841257 | 0.438598 |
| O  | O176  | 0.449484 | 0.337980 | 0.937038 |
| O  | O177  | 0.097979 | 0.644265 | 0.443380 |
| O  | O178  | 0.449881 | 0.149495 | 0.936623 |
| O  | O179  | 0.940542 | 0.165872 | 0.563320 |
| O  | O180  | 0.602945 | 0.660369 | 0.046368 |
| O  | O181  | 0.937789 | 0.327609 | 0.567144 |
| O  | O182  | 0.595285 | 0.841820 | 0.029976 |
| O  | O183  | 0.149495 | 0.831702 | 0.256627 |
| O  | O184  | 0.398482 | 0.326535 | 0.754759 |
| O  | O185  | 0.154401 | 0.663372 | 0.267063 |
| O  | O186  | 0.393790 | 0.160463 | 0.759197 |
| O  | O187  | 0.891780 | 0.126402 | 0.738759 |
| O  | O188  | 0.658175 | 0.650103 | 0.223867 |
| O  | O189  | 0.894160 | 0.358076 | 0.748335 |
| O  | O190  | 0.646618 | 0.826773 | 0.210365 |
| O  | O191  | 0.224076 | 0.746058 | 0.159011 |
| O  | O192  | 0.321594 | 0.244961 | 0.656012 |
| O  | O193  | 0.847883 | 0.241858 | 0.808449 |
| O  | O194  | 0.728101 | 0.739105 | 0.326089 |
| O  | O195  | 0.741269 | 0.765966 | 0.610063 |
| Al | Al196 | 0.821014 | 0.941103 | 0.789817 |
| Al | Al197 | 0.720973 | 0.820883 | 0.269257 |
| Si | Si198 | 0.739040 | 0.932739 | 0.436002 |
| Si | Si199 | 0.721123 | 0.660337 | 0.295028 |
| Si | Si200 | 0.448281 | 0.054359 | 0.188707 |
| Si | Si201 | 0.097894 | 0.556066 | 0.687865 |
| Si | Si202 | 0.449163 | 0.433200 | 0.187120 |
| Si | Si203 | 0.097020 | 0.932156 | 0.682398 |
| Si | Si204 | 0.597799 | 0.941425 | 0.807474 |
| Si | Si205 | 0.947462 | 0.441927 | 0.318088 |
| Si | Si206 | 0.592362 | 0.546177 | 0.817870 |
| Si | Si207 | 0.947706 | 0.054042 | 0.313293 |
| Si | Si208 | 0.340683 | 0.025739 | 0.339053 |
| Si | Si209 | 0.203223 | 0.526269 | 0.841069 |
| Si | Si210 | 0.341696 | 0.464383 | 0.338674 |
| Si | Si211 | 0.200528 | 0.963935 | 0.838566 |
| Si | Si212 | 0.698341 | 0.971098 | 0.647053 |
| Si | Si213 | 0.843262 | 0.464507 | 0.156121 |
| Si | Si214 | 0.707394 | 0.519152 | 0.671825 |
| Si | Si215 | 0.848487 | 0.028268 | 0.147905 |
| Si | Si216 | 0.298983 | 0.048860 | 0.556883 |
| Si | Si217 | 0.244383 | 0.549471 | 0.059307 |

|    |       |          |          |          |
|----|-------|----------|----------|----------|
| Si | Si218 | 0.299379 | 0.441429 | 0.556698 |
| Si | Si219 | 0.241004 | 0.943211 | 0.056431 |
| Si | Si220 | 0.799445 | 0.426300 | 0.945088 |
| Si | Si221 | 0.745123 | 0.557777 | 0.458285 |
| Si | Si222 | 0.791851 | 0.061432 | 0.946876 |
| Si | Si223 | 0.143964 | 0.056660 | 0.547192 |
| Si | Si224 | 0.400186 | 0.554261 | 0.046967 |
| Si | Si225 | 0.143911 | 0.434090 | 0.545701 |
| Si | Si226 | 0.394786 | 0.936247 | 0.046491 |
| Si | Si227 | 0.894655 | 0.929078 | 0.441361 |
| Si | Si228 | 0.643559 | 0.429898 | 0.959375 |
| Si | Si229 | 0.900912 | 0.568560 | 0.450198 |
| Si | Si230 | 0.639963 | 0.062306 | 0.953694 |
| Si | Si231 | 0.098499 | 0.028325 | 0.331099 |
| Si | Si232 | 0.443663 | 0.524086 | 0.828436 |
| Si | Si233 | 0.098735 | 0.464484 | 0.327385 |
| Si | Si234 | 0.445862 | 0.963407 | 0.830218 |
| Si | Si235 | 0.950204 | 0.963833 | 0.649734 |
| Si | Si236 | 0.597515 | 0.466973 | 0.170481 |
| Si | Si237 | 0.951112 | 0.528545 | 0.658696 |
| Si | Si238 | 0.594191 | 0.025537 | 0.160820 |
| Si | Si239 | 0.219679 | 0.065771 | 0.207839 |
| Si | Si240 | 0.320551 | 0.565710 | 0.706349 |
| Si | Si241 | 0.221383 | 0.424620 | 0.207152 |
| Si | Si242 | 0.320793 | 0.925161 | 0.707524 |
| Si | Si243 | 0.721778 | 0.440089 | 0.303682 |
| Si | Si244 | 0.829689 | 0.549528 | 0.805739 |
| Si | Si245 | 0.721479 | 0.053618 | 0.283205 |
| Si | Si246 | 0.445613 | 0.824343 | 0.182754 |
| Si | Si247 | 0.096249 | 0.324041 | 0.693482 |
| Si | Si248 | 0.452080 | 0.667633 | 0.188663 |
| Si | Si249 | 0.094757 | 0.166718 | 0.696850 |
| Si | Si250 | 0.594731 | 0.167763 | 0.795851 |
| Si | Si251 | 0.956176 | 0.669837 | 0.297904 |
| Si | Si252 | 0.596542 | 0.326518 | 0.800835 |
| Si | Si253 | 0.953345 | 0.827427 | 0.289783 |
| Si | Si254 | 0.341633 | 0.867773 | 0.332968 |
| Si | Si255 | 0.208404 | 0.368081 | 0.835252 |
| Si | Si256 | 0.344251 | 0.622673 | 0.332648 |
| Si | Si257 | 0.205317 | 0.122175 | 0.835462 |
| Si | Si258 | 0.707802 | 0.129632 | 0.647995 |
| Si | Si259 | 0.844700 | 0.622792 | 0.159203 |
| Si | Si260 | 0.710761 | 0.360846 | 0.652520 |
| Si | Si261 | 0.850042 | 0.867946 | 0.137188 |

|    |       |          |          |          |
|----|-------|----------|----------|----------|
| Si | Si262 | 0.294455 | 0.824866 | 0.539107 |
| Si | Si263 | 0.256590 | 0.324343 | 0.042699 |
| Si | Si264 | 0.294772 | 0.665524 | 0.538665 |
| Si | Si265 | 0.256727 | 0.164598 | 0.042494 |
| Si | Si266 | 0.753759 | 0.166622 | 0.437825 |
| Si | Si267 | 0.794082 | 0.664628 | 0.948779 |
| Si | Si268 | 0.752196 | 0.322366 | 0.439418 |
| Si | Si269 | 0.795202 | 0.818736 | 0.935610 |
| Si | Si270 | 0.142446 | 0.822641 | 0.535474 |
| Si | Si271 | 0.409267 | 0.322280 | 0.038455 |
| Si | Si272 | 0.142662 | 0.664961 | 0.538261 |
| Si | Si273 | 0.409420 | 0.165070 | 0.037762 |
| Si | Si274 | 0.906691 | 0.170950 | 0.454609 |
| Si | Si275 | 0.640208 | 0.667943 | 0.940508 |
| Si | Si276 | 0.905261 | 0.323391 | 0.457418 |
| Si | Si277 | 0.642771 | 0.822871 | 0.938128 |
| Si | Si278 | 0.098200 | 0.871623 | 0.326624 |
| Si | Si279 | 0.450052 | 0.366510 | 0.824063 |
| Si | Si280 | 0.099647 | 0.621587 | 0.327565 |
| Si | Si281 | 0.450181 | 0.123173 | 0.822533 |
| Si | Si282 | 0.952177 | 0.119662 | 0.660941 |
| Si | Si283 | 0.597438 | 0.625837 | 0.154925 |
| Si | Si284 | 0.951429 | 0.370376 | 0.667287 |
| Si | Si285 | 0.593278 | 0.866130 | 0.146384 |
| Si | Si286 | 0.219619 | 0.821778 | 0.201171 |
| Si | Si287 | 0.327882 | 0.320141 | 0.699452 |
| Si | Si288 | 0.221635 | 0.670958 | 0.203424 |
| Si | Si289 | 0.325272 | 0.169572 | 0.699641 |
| Si | Si290 | 0.828430 | 0.165267 | 0.783471 |
| Si | Si291 | 0.829805 | 0.319232 | 0.789103 |
| Zn | Zn292 | 0.767678 | 0.824696 | 0.703841 |
| Zn | Zn293 | 0.713677 | 0.772685 | 0.470269 |

**C<sub>4</sub>H<sub>10</sub>-Phys.Ads-ZnOH<sup>+</sup> (Fig. 5/M1)** Total energy = -1939.24721801 eV

data\_

```

_audit_creation_method    'Materials Studio'
_cell_length_a            20.357621
_cell_length_b            20.050598
_cell_length_c            13.476578
_cell_angle_alpha        90.000000
_cell_angle_beta         90.000000
_cell_angle_gamma        90.000000
_symmetry_space_group_name_H-M  'P1'

```

| loop_                  |     |          |          |          |
|------------------------|-----|----------|----------|----------|
| _atom_site_type_symbol |     |          |          |          |
| _atom_site_label       |     |          |          |          |
| _atom_site_fract_x     |     |          |          |          |
| _atom_site_fract_y     |     |          |          |          |
| _atom_site_fract_z     |     |          |          |          |
| H                      | H1  | 0.758272 | 0.753340 | 0.654768 |
| H                      | H2  | 0.487878 | 0.647537 | 0.635141 |
| H                      | H3  | 0.533516 | 0.592860 | 0.558697 |
| H                      | H4  | 0.461941 | 0.632083 | 0.512026 |
| H                      | H5  | 0.562705 | 0.688509 | 0.446183 |
| H                      | H6  | 0.590614 | 0.702560 | 0.568825 |
| H                      | H7  | 0.492143 | 0.774381 | 0.601276 |
| H                      | H8  | 0.465237 | 0.761273 | 0.478699 |
| H                      | H9  | 0.595160 | 0.829742 | 0.537053 |
| H                      | H10 | 0.524101 | 0.870897 | 0.493442 |
| H                      | H11 | 0.567582 | 0.816688 | 0.413648 |
| C                      | C12 | 0.505136 | 0.639266 | 0.559133 |
| C                      | C13 | 0.546176 | 0.698303 | 0.522543 |
| C                      | C14 | 0.509395 | 0.765046 | 0.525226 |
| C                      | C15 | 0.551430 | 0.823865 | 0.490477 |
| O                      | O16 | 0.520382 | 0.035746 | 0.215936 |
| O                      | O17 | 0.017695 | 0.541541 | 0.717889 |
| O                      | O18 | 0.523982 | 0.440614 | 0.216277 |
| O                      | O19 | 0.012262 | 0.935444 | 0.708162 |
| O                      | O20 | 0.513463 | 0.947594 | 0.789541 |
| O                      | O21 | 0.019037 | 0.455856 | 0.294131 |
| O                      | O22 | 0.513529 | 0.539210 | 0.795796 |
| O                      | O23 | 0.021057 | 0.040208 | 0.293547 |
| O                      | O24 | 0.403802 | 0.056440 | 0.294265 |
| O                      | O25 | 0.134941 | 0.556808 | 0.792430 |
| O                      | O26 | 0.403203 | 0.432731 | 0.286007 |
| O                      | O27 | 0.127870 | 0.940390 | 0.793781 |
| O                      | O28 | 0.627426 | 0.944446 | 0.701878 |
| O                      | O29 | 0.901909 | 0.436374 | 0.217528 |
| O                      | O30 | 0.632720 | 0.536575 | 0.729291 |
| O                      | O31 | 0.904394 | 0.043822 | 0.213293 |
| O                      | O32 | 0.437878 | 0.121487 | 0.130809 |
| O                      | O33 | 0.101402 | 0.623640 | 0.630527 |
| O                      | O34 | 0.438980 | 0.363295 | 0.126168 |
| O                      | O35 | 0.110514 | 0.864777 | 0.634807 |
| O                      | O36 | 0.605084 | 0.863282 | 0.852815 |
| O                      | O37 | 0.937575 | 0.371481 | 0.380131 |
| O                      | O38 | 0.601186 | 0.618912 | 0.876670 |



|   |     |          |          |          |
|---|-----|----------|----------|----------|
| 0 | 039 | 0.931039 | 0.120634 | 0.370089 |
| 0 | 040 | 0.413618 | 0.992093 | 0.123618 |
| 0 | 041 | 0.121304 | 0.492942 | 0.621339 |
| 0 | 042 | 0.426725 | 0.494855 | 0.114710 |
| 0 | 043 | 0.110882 | 0.996178 | 0.616177 |
| 0 | 044 | 0.619412 | 0.992958 | 0.884625 |
| 0 | 045 | 0.912181 | 0.501704 | 0.386910 |
| 0 | 046 | 0.605983 | 0.487847 | 0.909466 |
| 0 | 047 | 0.920037 | 0.989605 | 0.391964 |
| 0 | 048 | 0.339664 | 0.038383 | 0.461751 |
| 0 | 049 | 0.196234 | 0.538076 | 0.960749 |
| 0 | 050 | 0.339843 | 0.451971 | 0.455318 |
| 0 | 051 | 0.196005 | 0.951840 | 0.958374 |
| 0 | 052 | 0.693583 | 0.940768 | 0.536601 |
| 0 | 053 | 0.838240 | 0.426369 | 0.048873 |
| 0 | 054 | 0.702983 | 0.537513 | 0.567557 |
| 0 | 055 | 0.838844 | 0.037860 | 0.043796 |
| 0 | 056 | 0.334663 | 0.946126 | 0.318066 |
| 0 | 057 | 0.203492 | 0.446112 | 0.816809 |
| 0 | 058 | 0.333451 | 0.542831 | 0.310025 |
| 0 | 059 | 0.207473 | 0.043836 | 0.814700 |
| 0 | 060 | 0.706226 | 0.045393 | 0.657138 |
| 0 | 061 | 0.849566 | 0.544558 | 0.132704 |
| 0 | 062 | 0.717184 | 0.437612 | 0.696672 |
| 0 | 063 | 0.828560 | 0.938872 | 0.175053 |
| 0 | 064 | 0.272673 | 0.060409 | 0.297010 |
| 0 | 065 | 0.265314 | 0.560672 | 0.797152 |
| 0 | 066 | 0.272715 | 0.427486 | 0.291501 |
| 0 | 067 | 0.257616 | 0.924426 | 0.788952 |
| 0 | 068 | 0.757971 | 0.930368 | 0.706895 |
| 0 | 069 | 0.772175 | 0.452459 | 0.212658 |
| 0 | 070 | 0.760528 | 0.557775 | 0.741311 |
| 0 | 071 | 0.775089 | 0.057294 | 0.211497 |
| 0 | 072 | 0.312954 | 0.119305 | 0.610814 |
| 0 | 073 | 0.224924 | 0.618800 | 0.109338 |
| 0 | 074 | 0.315254 | 0.371235 | 0.605384 |
| 0 | 075 | 0.219361 | 0.870498 | 0.108851 |
| 0 | 076 | 0.716454 | 0.873346 | 0.372772 |
| 0 | 077 | 0.806608 | 0.355459 | 0.892279 |
| 0 | 078 | 0.720951 | 0.631286 | 0.432144 |
| 0 | 079 | 0.810152 | 0.119055 | 0.895186 |
| 0 | 080 | 0.218649 | 0.043678 | 0.531860 |
| 0 | 081 | 0.315605 | 0.536648 | 0.035807 |
| 0 | 082 | 0.217641 | 0.437665 | 0.517637 |

|   |      |          |          |          |
|---|------|----------|----------|----------|
| 0 | 083  | 0.317142 | 0.937126 | 0.021993 |
| 0 | 084  | 0.815051 | 0.932363 | 0.468500 |
| 0 | 085  | 0.720866 | 0.441827 | 0.966383 |
| 0 | 086  | 0.822703 | 0.560891 | 0.499126 |
| 0 | 087  | 0.715308 | 0.051166 | 0.985882 |
| 0 | 088  | 0.313779 | 0.988792 | 0.638623 |
| 0 | 089  | 0.215373 | 0.488692 | 0.139353 |
| 0 | 090  | 0.303006 | 0.501545 | 0.629717 |
| 0 | 091  | 0.229619 | 0.000597 | 0.133863 |
| 0 | 092  | 0.725851 | 0.004585 | 0.374336 |
| 0 | 093  | 0.827528 | 0.485345 | 0.873367 |
| 0 | 094  | 0.732771 | 0.504935 | 0.382371 |
| 0 | 095  | 0.799998 | 0.989104 | 0.870501 |
| 0 | 096  | 0.129102 | 0.127152 | 0.603492 |
| 0 | 097  | 0.401561 | 0.625180 | 0.103582 |
| 0 | 098  | 0.128025 | 0.360826 | 0.602151 |
| 0 | 099  | 0.410915 | 0.860858 | 0.098302 |
| 0 | 0100 | 0.907686 | 0.857007 | 0.388326 |
| 0 | 0101 | 0.628968 | 0.356907 | 0.904160 |
| 0 | 0102 | 0.911724 | 0.634141 | 0.403697 |
| 0 | 0103 | 0.622750 | 0.125097 | 0.901252 |
| 0 | 0104 | 0.103060 | 0.057348 | 0.443168 |
| 0 | 0105 | 0.428257 | 0.556552 | 0.941849 |
| 0 | 0106 | 0.095316 | 0.435871 | 0.449444 |
| 0 | 0107 | 0.438147 | 0.939664 | 0.947932 |
| 0 | 0108 | 0.930416 | 0.918419 | 0.557091 |
| 0 | 0109 | 0.614242 | 0.418369 | 0.075815 |
| 0 | 0110 | 0.945558 | 0.560407 | 0.557875 |
| 0 | 0111 | 0.594672 | 0.050016 | 0.057454 |
| 0 | 0112 | 0.145346 | 0.060539 | 0.256169 |
| 0 | 0113 | 0.391136 | 0.552991 | 0.752441 |
| 0 | 0114 | 0.143234 | 0.421349 | 0.267407 |
| 0 | 0115 | 0.387352 | 0.923695 | 0.768177 |
| 0 | 0116 | 0.885934 | 0.946495 | 0.738736 |
| 0 | 0117 | 0.646858 | 0.450007 | 0.261913 |
| 0 | 0118 | 0.890309 | 0.555449 | 0.737212 |
| 0 | 0119 | 0.646256 | 0.058494 | 0.239075 |
| 0 | 0120 | 0.110302 | 0.946484 | 0.336843 |
| 0 | 0121 | 0.429474 | 0.442400 | 0.843122 |
| 0 | 0122 | 0.114758 | 0.541935 | 0.335002 |
| 0 | 0123 | 0.426077 | 0.043252 | 0.826891 |
| 0 | 0124 | 0.947330 | 0.038179 | 0.630908 |
| 0 | 0125 | 0.594500 | 0.540380 | 0.139341 |
| 0 | 0126 | 0.938092 | 0.445911 | 0.651581 |

|   |      |          |          |          |
|---|------|----------|----------|----------|
| 0 | 0127 | 0.608635 | 0.941718 | 0.170107 |
| 0 | 0128 | 0.224982 | 0.132616 | 0.150025 |
| 0 | 0129 | 0.315218 | 0.632423 | 0.650661 |
| 0 | 0130 | 0.221719 | 0.355458 | 0.148350 |
| 0 | 0131 | 0.313555 | 0.855843 | 0.645694 |
| 0 | 0132 | 0.818464 | 0.860271 | 0.844463 |
| 0 | 0133 | 0.730828 | 0.373541 | 0.356860 |
| 0 | 0134 | 0.828128 | 0.618639 | 0.879425 |
| 0 | 0135 | 0.720688 | 0.134768 | 0.348566 |
| 0 | 0136 | 0.521066 | 0.846283 | 0.204991 |
| 0 | 0137 | 0.021876 | 0.353216 | 0.717352 |
| 0 | 0138 | 0.513587 | 0.633993 | 0.205129 |
| 0 | 0139 | 0.018418 | 0.136253 | 0.709868 |
| 0 | 0140 | 0.517775 | 0.133809 | 0.783651 |
| 0 | 0141 | 0.019460 | 0.628202 | 0.291440 |
| 0 | 0142 | 0.522002 | 0.354451 | 0.789752 |
| 0 | 0143 | 0.020004 | 0.857700 | 0.285045 |
| 0 | 0144 | 0.406356 | 0.836431 | 0.292019 |
| 0 | 0145 | 0.139236 | 0.332127 | 0.793784 |
| 0 | 0146 | 0.401121 | 0.655497 | 0.295602 |
| 0 | 0147 | 0.133060 | 0.152532 | 0.796808 |
| 0 | 0148 | 0.634878 | 0.151295 | 0.707963 |
| 0 | 0149 | 0.907121 | 0.651641 | 0.207340 |
| 0 | 0150 | 0.638085 | 0.332448 | 0.710371 |
| 0 | 0151 | 0.907376 | 0.833042 | 0.195538 |
| 0 | 0152 | 0.444055 | 0.742777 | 0.162880 |
| 0 | 0153 | 0.089290 | 0.243836 | 0.668609 |
| 0 | 0154 | 0.586738 | 0.242246 | 0.832298 |
| 0 | 0155 | 0.958400 | 0.744395 | 0.323753 |
| 0 | 0156 | 0.335449 | 0.850449 | 0.452980 |
| 0 | 0157 | 0.207869 | 0.352388 | 0.955124 |
| 0 | 0158 | 0.331553 | 0.631838 | 0.456135 |
| 0 | 0159 | 0.205839 | 0.135451 | 0.956385 |
| 0 | 0160 | 0.702788 | 0.153084 | 0.542851 |
| 0 | 0161 | 0.825004 | 0.665407 | 0.062775 |
| 0 | 0162 | 0.706445 | 0.351489 | 0.546700 |
| 0 | 0163 | 0.832158 | 0.842145 | 0.037723 |
| 0 | 0164 | 0.275948 | 0.832422 | 0.279181 |
| 0 | 0165 | 0.270316 | 0.335788 | 0.784550 |
| 0 | 0166 | 0.270334 | 0.656908 | 0.286967 |
| 0 | 0167 | 0.263382 | 0.160512 | 0.784077 |
| 0 | 0168 | 0.765055 | 0.155014 | 0.716165 |
| 0 | 0169 | 0.780054 | 0.630513 | 0.240535 |
| 0 | 0170 | 0.768680 | 0.317833 | 0.711368 |

|    |       |          |          |          |
|----|-------|----------|----------|----------|
| O  | O171  | 0.777919 | 0.821212 | 0.214116 |
| O  | O172  | 0.298443 | 0.742834 | 0.551042 |
| O  | O173  | 0.243938 | 0.243591 | 0.052875 |
| O  | O174  | 0.740305 | 0.252073 | 0.425375 |
| O  | O175  | 0.794344 | 0.743226 | 0.914239 |
| O  | O176  | 0.213647 | 0.841596 | 0.518866 |
| O  | O177  | 0.327125 | 0.344136 | 0.031275 |
| O  | O178  | 0.212417 | 0.643337 | 0.530573 |
| O  | O179  | 0.326908 | 0.141597 | 0.027846 |
| O  | O180  | 0.822755 | 0.152371 | 0.469207 |
| O  | O181  | 0.713301 | 0.644884 | 0.966404 |
| O  | O182  | 0.828357 | 0.343212 | 0.479737 |
| O  | O183  | 0.712991 | 0.842553 | 0.961267 |
| O  | O184  | 0.131621 | 0.744158 | 0.572493 |
| O  | O185  | 0.406761 | 0.241767 | 0.074327 |
| O  | O186  | 0.909890 | 0.246190 | 0.419759 |
| O  | O187  | 0.630281 | 0.743232 | 0.919064 |
| O  | O188  | 0.094055 | 0.836667 | 0.442933 |
| O  | O189  | 0.439660 | 0.327159 | 0.935147 |
| O  | O190  | 0.098716 | 0.653659 | 0.438782 |
| O  | O191  | 0.442089 | 0.151206 | 0.939324 |
| O  | O192  | 0.937122 | 0.159468 | 0.560609 |
| O  | O193  | 0.600690 | 0.661220 | 0.064834 |
| O  | O194  | 0.943313 | 0.327505 | 0.566357 |
| O  | O195  | 0.595497 | 0.839936 | 0.045066 |
| O  | O196  | 0.146398 | 0.830372 | 0.261867 |
| O  | O197  | 0.397721 | 0.331981 | 0.747243 |
| O  | O198  | 0.142807 | 0.657809 | 0.252397 |
| O  | O199  | 0.392110 | 0.160587 | 0.756817 |
| O  | O200  | 0.891405 | 0.130197 | 0.742537 |
| O  | O201  | 0.638384 | 0.640126 | 0.252278 |
| O  | O202  | 0.895015 | 0.341673 | 0.749635 |
| O  | O203  | 0.648070 | 0.821247 | 0.223102 |
| O  | O204  | 0.219108 | 0.744585 | 0.161618 |
| O  | O205  | 0.317976 | 0.245940 | 0.659716 |
| O  | O206  | 0.836813 | 0.236545 | 0.825489 |
| O  | O207  | 0.717433 | 0.744193 | 0.343806 |
| O  | O208  | 0.745440 | 0.776712 | 0.594981 |
| Al | Al209 | 0.712634 | 0.658412 | 0.303847 |
| Si | Si210 | 0.444204 | 0.051628 | 0.190578 |
| Si | Si211 | 0.094030 | 0.553650 | 0.689518 |
| Si | Si212 | 0.447545 | 0.433025 | 0.185688 |
| Si | Si213 | 0.090611 | 0.934367 | 0.687691 |
| Si | Si214 | 0.591228 | 0.937143 | 0.808198 |

|    |       |          |          |          |
|----|-------|----------|----------|----------|
| Si | Si215 | 0.942751 | 0.441380 | 0.320314 |
| Si | Si216 | 0.589251 | 0.545757 | 0.829235 |
| Si | Si217 | 0.943759 | 0.048719 | 0.317951 |
| Si | Si218 | 0.337667 | 0.025252 | 0.343287 |
| Si | Si219 | 0.200196 | 0.525161 | 0.842536 |
| Si | Si220 | 0.337422 | 0.463701 | 0.336251 |
| Si | Si221 | 0.197413 | 0.965088 | 0.839797 |
| Si | Si222 | 0.696476 | 0.965150 | 0.650864 |
| Si | Si223 | 0.840614 | 0.465613 | 0.154034 |
| Si | Si224 | 0.703418 | 0.516907 | 0.683805 |
| Si | Si225 | 0.836863 | 0.019208 | 0.160886 |
| Si | Si226 | 0.295953 | 0.047765 | 0.561377 |
| Si | Si227 | 0.238307 | 0.545817 | 0.062105 |
| Si | Si228 | 0.294107 | 0.440481 | 0.552550 |
| Si | Si229 | 0.240610 | 0.939962 | 0.056538 |
| Si | Si230 | 0.738282 | 0.937477 | 0.437714 |
| Si | Si231 | 0.798169 | 0.427422 | 0.945055 |
| Si | Si232 | 0.745259 | 0.557373 | 0.470644 |
| Si | Si233 | 0.791329 | 0.049401 | 0.948577 |
| Si | Si234 | 0.140733 | 0.055912 | 0.548989 |
| Si | Si235 | 0.392985 | 0.553325 | 0.049492 |
| Si | Si236 | 0.140743 | 0.431980 | 0.548155 |
| Si | Si237 | 0.394764 | 0.932464 | 0.048081 |
| Si | Si238 | 0.893317 | 0.924553 | 0.450957 |
| Si | Si239 | 0.642703 | 0.425995 | 0.963849 |
| Si | Si240 | 0.898582 | 0.564063 | 0.460778 |
| Si | Si241 | 0.638039 | 0.054902 | 0.956654 |
| Si | Si242 | 0.094742 | 0.025948 | 0.332759 |
| Si | Si243 | 0.440385 | 0.522420 | 0.834176 |
| Si | Si244 | 0.093107 | 0.463729 | 0.336111 |
| Si | Si245 | 0.441230 | 0.963772 | 0.832944 |
| Si | Si246 | 0.943564 | 0.959512 | 0.659231 |
| Si | Si247 | 0.595007 | 0.462778 | 0.173067 |
| Si | Si248 | 0.947465 | 0.525568 | 0.667190 |
| Si | Si249 | 0.592634 | 0.021258 | 0.170419 |
| Si | Si250 | 0.218230 | 0.062651 | 0.209033 |
| Si | Si251 | 0.318417 | 0.561222 | 0.707274 |
| Si | Si252 | 0.213498 | 0.423813 | 0.211135 |
| Si | Si253 | 0.317901 | 0.923916 | 0.709987 |
| Si | Si254 | 0.815695 | 0.931933 | 0.789289 |
| Si | Si255 | 0.720922 | 0.445026 | 0.303275 |
| Si | Si256 | 0.826744 | 0.553549 | 0.808801 |
| Si | Si257 | 0.716924 | 0.063190 | 0.293162 |
| Si | Si258 | 0.445863 | 0.821347 | 0.189489 |

|    |       |          |          |          |
|----|-------|----------|----------|----------|
| Si | Si259 | 0.094280 | 0.322295 | 0.695367 |
| Si | Si260 | 0.440853 | 0.664434 | 0.191413 |
| Si | Si261 | 0.092214 | 0.165131 | 0.694649 |
| Si | Si262 | 0.590585 | 0.163407 | 0.806374 |
| Si | Si263 | 0.949201 | 0.665005 | 0.306503 |
| Si | Si264 | 0.593699 | 0.321236 | 0.809504 |
| Si | Si265 | 0.948595 | 0.822585 | 0.297954 |
| Si | Si266 | 0.337997 | 0.866334 | 0.335322 |
| Si | Si267 | 0.205331 | 0.366566 | 0.837193 |
| Si | Si268 | 0.334050 | 0.621711 | 0.337022 |
| Si | Si269 | 0.202280 | 0.123110 | 0.837833 |
| Si | Si270 | 0.702226 | 0.125895 | 0.656135 |
| Si | Si271 | 0.838739 | 0.622567 | 0.162786 |
| Si | Si272 | 0.707190 | 0.359675 | 0.666360 |
| Si | Si273 | 0.836730 | 0.859241 | 0.154884 |
| Si | Si274 | 0.290019 | 0.822474 | 0.542499 |
| Si | Si275 | 0.250379 | 0.323486 | 0.047122 |
| Si | Si276 | 0.289242 | 0.663175 | 0.546914 |
| Si | Si277 | 0.250677 | 0.163753 | 0.046550 |
| Si | Si278 | 0.746682 | 0.172993 | 0.446762 |
| Si | Si279 | 0.789969 | 0.667506 | 0.955720 |
| Si | Si280 | 0.751473 | 0.329698 | 0.452378 |
| Si | Si281 | 0.789448 | 0.821879 | 0.940417 |
| Si | Si282 | 0.137315 | 0.821955 | 0.541872 |
| Si | Si283 | 0.403128 | 0.319377 | 0.041554 |
| Si | Si284 | 0.136094 | 0.666095 | 0.543121 |
| Si | Si285 | 0.403419 | 0.163902 | 0.042883 |
| Si | Si286 | 0.900510 | 0.169063 | 0.454450 |
| Si | Si287 | 0.636268 | 0.666740 | 0.957666 |
| Si | Si288 | 0.904824 | 0.322201 | 0.461069 |
| Si | Si289 | 0.636096 | 0.821962 | 0.944777 |
| Si | Si290 | 0.092971 | 0.867667 | 0.331308 |
| Si | Si291 | 0.447076 | 0.364116 | 0.828483 |
| Si | Si292 | 0.094395 | 0.620241 | 0.329381 |
| Si | Si293 | 0.444288 | 0.122074 | 0.826820 |
| Si | Si294 | 0.948195 | 0.116382 | 0.661293 |
| Si | Si295 | 0.588056 | 0.619334 | 0.167164 |
| Si | Si296 | 0.949477 | 0.366994 | 0.671315 |
| Si | Si297 | 0.593256 | 0.862484 | 0.160589 |
| Si | Si298 | 0.215235 | 0.820486 | 0.202961 |
| Si | Si299 | 0.325218 | 0.322031 | 0.699283 |
| Si | Si300 | 0.214466 | 0.668630 | 0.202395 |
| Si | Si301 | 0.321593 | 0.170448 | 0.702722 |
| Si | Si302 | 0.825659 | 0.159627 | 0.794048 |

|    |       |          |          |          |
|----|-------|----------|----------|----------|
| Si | Si303 | 0.826783 | 0.313564 | 0.794353 |
| Si | Si304 | 0.715056 | 0.816796 | 0.287825 |
| Zn | Zn305 | 0.730155 | 0.721713 | 0.491756 |

**TS-C<sub>4</sub>H<sub>10</sub>-Dehydro-on-HydroxyO-ZnOH<sup>+</sup> (Fig. 5/TS1)**

Total energy = -1937.62921097 eV

data\_

\_audit\_creation\_method 'Materials Studio'

\_cell\_length\_a 20.357621

\_cell\_length\_b 20.050598

\_cell\_length\_c 13.476578

\_cell\_angle\_alpha 90.000000

\_cell\_angle\_beta 90.000000

\_cell\_angle\_gamma 90.000000

\_symmetry\_space\_group\_name\_H-M 'P1'

loop\_

\_atom\_site\_type\_symbol

\_atom\_site\_label

\_atom\_site\_fract\_x

\_atom\_site\_fract\_y

\_atom\_site\_fract\_z

|   |     |          |          |          |
|---|-----|----------|----------|----------|
| H | H1  | 0.792079 | 0.754157 | 0.639534 |
| H | H2  | 0.484300 | 0.804770 | 0.771315 |
| H | H3  | 0.422728 | 0.748959 | 0.730418 |
| H | H4  | 0.453639 | 0.810495 | 0.648868 |
| H | H5  | 0.500804 | 0.694598 | 0.614299 |
| H | H6  | 0.533427 | 0.693905 | 0.734941 |
| H | H7  | 0.600717 | 0.796707 | 0.691070 |
| H | H8  | 0.571311 | 0.791063 | 0.569130 |
| H | H9  | 0.650663 | 0.682029 | 0.678256 |
| H | H10 | 0.700146 | 0.745808 | 0.619631 |
| H | H11 | 0.617875 | 0.672406 | 0.561853 |
| C | C12 | 0.467274 | 0.775527 | 0.707713 |
| C | C13 | 0.520428 | 0.726919 | 0.673215 |
| C | C14 | 0.583115 | 0.761250 | 0.635234 |
| C | C15 | 0.638039 | 0.711087 | 0.611824 |
| O | O16 | 0.511162 | 0.031181 | 0.208840 |
| O | O17 | 0.020945 | 0.533496 | 0.709431 |
| O | O18 | 0.524368 | 0.440008 | 0.199689 |
| O | O19 | 0.012810 | 0.945839 | 0.702569 |
| O | O20 | 0.522030 | 0.958728 | 0.787228 |
| O | O21 | 0.018095 | 0.455757 | 0.283410 |
| O | O22 | 0.513507 | 0.547720 | 0.790971 |

|   |     |          |          |          |
|---|-----|----------|----------|----------|
| 0 | 023 | 0.021324 | 0.042773 | 0.289902 |
| 0 | 024 | 0.393047 | 0.062161 | 0.273832 |
| 0 | 025 | 0.137953 | 0.562573 | 0.780685 |
| 0 | 026 | 0.404301 | 0.452450 | 0.269003 |
| 0 | 027 | 0.135759 | 0.951422 | 0.759308 |
| 0 | 028 | 0.640596 | 0.933690 | 0.719382 |
| 0 | 029 | 0.901472 | 0.429973 | 0.206989 |
| 0 | 030 | 0.634519 | 0.540926 | 0.725834 |
| 0 | 031 | 0.895645 | 0.038945 | 0.245670 |
| 0 | 032 | 0.437917 | 0.116636 | 0.107791 |
| 0 | 033 | 0.097424 | 0.619455 | 0.614353 |
| 0 | 034 | 0.430387 | 0.366543 | 0.123718 |
| 0 | 035 | 0.098553 | 0.866678 | 0.617362 |
| 0 | 036 | 0.597748 | 0.870578 | 0.878899 |
| 0 | 037 | 0.939058 | 0.367991 | 0.369971 |
| 0 | 038 | 0.604061 | 0.622977 | 0.873632 |
| 0 | 039 | 0.940267 | 0.120993 | 0.387093 |
| 0 | 040 | 0.404011 | 0.988040 | 0.114132 |
| 0 | 041 | 0.129638 | 0.490662 | 0.617814 |
| 0 | 042 | 0.433718 | 0.497051 | 0.087506 |
| 0 | 043 | 0.101023 | 0.996637 | 0.580280 |
| 0 | 044 | 0.628706 | 0.999553 | 0.886769 |
| 0 | 045 | 0.908964 | 0.496991 | 0.374622 |
| 0 | 046 | 0.603756 | 0.491777 | 0.904152 |
| 0 | 047 | 0.938309 | 0.990073 | 0.417877 |
| 0 | 048 | 0.333947 | 0.059355 | 0.446122 |
| 0 | 049 | 0.198992 | 0.557982 | 0.951481 |
| 0 | 050 | 0.337405 | 0.451958 | 0.436038 |
| 0 | 051 | 0.199895 | 0.949938 | 0.928055 |
| 0 | 052 | 0.706823 | 0.928945 | 0.554596 |
| 0 | 053 | 0.837956 | 0.427763 | 0.038620 |
| 0 | 054 | 0.701507 | 0.534108 | 0.559831 |
| 0 | 055 | 0.834051 | 0.047895 | 0.075537 |
| 0 | 056 | 0.345791 | 0.947260 | 0.341960 |
| 0 | 057 | 0.190756 | 0.448670 | 0.839455 |
| 0 | 058 | 0.324307 | 0.553287 | 0.311402 |
| 0 | 059 | 0.215346 | 0.051941 | 0.804425 |
| 0 | 060 | 0.690841 | 0.045603 | 0.643146 |
| 0 | 061 | 0.851844 | 0.542495 | 0.134676 |
| 0 | 062 | 0.712462 | 0.436988 | 0.692437 |
| 0 | 063 | 0.816968 | 0.940040 | 0.187583 |
| 0 | 064 | 0.263623 | 0.042673 | 0.283773 |
| 0 | 065 | 0.268409 | 0.549390 | 0.787015 |
| 0 | 066 | 0.275009 | 0.436029 | 0.265028 |



|   |      |          |          |          |
|---|------|----------|----------|----------|
| 0 | 067  | 0.265119 | 0.934563 | 0.759333 |
| 0 | 068  | 0.770167 | 0.956211 | 0.721388 |
| 0 | 069  | 0.771371 | 0.448890 | 0.203191 |
| 0 | 070  | 0.763880 | 0.555691 | 0.728578 |
| 0 | 071  | 0.766363 | 0.055712 | 0.241841 |
| 0 | 072  | 0.303719 | 0.132295 | 0.602542 |
| 0 | 073  | 0.234391 | 0.627978 | 0.108828 |
| 0 | 074  | 0.324525 | 0.376899 | 0.592320 |
| 0 | 075  | 0.209708 | 0.872082 | 0.082603 |
| 0 | 076  | 0.726543 | 0.867038 | 0.386508 |
| 0 | 077  | 0.806695 | 0.364159 | 0.875170 |
| 0 | 078  | 0.723163 | 0.625292 | 0.423972 |
| 0 | 079  | 0.821152 | 0.121661 | 0.916930 |
| 0 | 080  | 0.220225 | 0.039601 | 0.538194 |
| 0 | 081  | 0.314747 | 0.535543 | 0.035571 |
| 0 | 082  | 0.217529 | 0.429111 | 0.504611 |
| 0 | 083  | 0.318233 | 0.924699 | 0.999971 |
| 0 | 084  | 0.816189 | 0.952952 | 0.451123 |
| 0 | 085  | 0.722969 | 0.451918 | 0.952556 |
| 0 | 086  | 0.823081 | 0.554004 | 0.495634 |
| 0 | 087  | 0.715688 | 0.063532 | 0.997380 |
| 0 | 088  | 0.331636 | 0.004050 | 0.623790 |
| 0 | 089  | 0.205487 | 0.499053 | 0.125932 |
| 0 | 090  | 0.297471 | 0.505718 | 0.606310 |
| 0 | 091  | 0.237087 | 0.000570 | 0.101349 |
| 0 | 092  | 0.700860 | 0.996368 | 0.387453 |
| 0 | 093  | 0.832940 | 0.494079 | 0.869594 |
| 0 | 094  | 0.735138 | 0.498179 | 0.376867 |
| 0 | 095  | 0.804652 | 0.990725 | 0.904483 |
| 0 | 096  | 0.127669 | 0.126681 | 0.588382 |
| 0 | 097  | 0.400218 | 0.626124 | 0.096505 |
| 0 | 098  | 0.118648 | 0.360969 | 0.581971 |
| 0 | 099  | 0.418011 | 0.858341 | 0.078368 |
| 0 | 0100 | 0.906478 | 0.861408 | 0.407942 |
| 0 | 0101 | 0.635318 | 0.363159 | 0.892150 |
| 0 | 0102 | 0.916048 | 0.626923 | 0.408017 |
| 0 | 0103 | 0.617382 | 0.130105 | 0.913061 |
| 0 | 0104 | 0.120545 | 0.064915 | 0.415389 |
| 0 | 0105 | 0.417877 | 0.567138 | 0.923064 |
| 0 | 0106 | 0.094998 | 0.446881 | 0.439957 |
| 0 | 0107 | 0.440983 | 0.944438 | 0.937214 |
| 0 | 0108 | 0.911053 | 0.923174 | 0.581462 |
| 0 | 0109 | 0.619966 | 0.420441 | 0.066776 |
| 0 | 0110 | 0.946162 | 0.542088 | 0.551715 |

|   |      |          |          |          |
|---|------|----------|----------|----------|
| 0 | 0111 | 0.593482 | 0.049054 | 0.061342 |
| 0 | 0112 | 0.141144 | 0.039619 | 0.222994 |
| 0 | 0113 | 0.392388 | 0.538403 | 0.732664 |
| 0 | 0114 | 0.144276 | 0.427194 | 0.260009 |
| 0 | 0115 | 0.396212 | 0.931154 | 0.753245 |
| 0 | 0116 | 0.894463 | 0.951734 | 0.773592 |
| 0 | 0117 | 0.646109 | 0.448607 | 0.255685 |
| 0 | 0118 | 0.894464 | 0.563415 | 0.731231 |
| 0 | 0119 | 0.635484 | 0.060399 | 0.247578 |
| 0 | 0120 | 0.101562 | 0.943961 | 0.344939 |
| 0 | 0121 | 0.438775 | 0.446459 | 0.853941 |
| 0 | 0122 | 0.109388 | 0.548459 | 0.317119 |
| 0 | 0123 | 0.429445 | 0.049895 | 0.821392 |
| 0 | 0124 | 0.933379 | 0.044840 | 0.646503 |
| 0 | 0125 | 0.597541 | 0.541218 | 0.134254 |
| 0 | 0126 | 0.928497 | 0.441578 | 0.677862 |
| 0 | 0127 | 0.605299 | 0.941797 | 0.174403 |
| 0 | 0128 | 0.222491 | 0.126972 | 0.143642 |
| 0 | 0129 | 0.319271 | 0.631100 | 0.650919 |
| 0 | 0130 | 0.216382 | 0.365934 | 0.126901 |
| 0 | 0131 | 0.326861 | 0.871115 | 0.616135 |
| 0 | 0132 | 0.811471 | 0.865654 | 0.851373 |
| 0 | 0133 | 0.728885 | 0.367992 | 0.344528 |
| 0 | 0134 | 0.823329 | 0.627295 | 0.863591 |
| 0 | 0135 | 0.704761 | 0.128727 | 0.376004 |
| 0 | 0136 | 0.513808 | 0.849991 | 0.213117 |
| 0 | 0137 | 0.020377 | 0.349769 | 0.712644 |
| 0 | 0138 | 0.511102 | 0.629770 | 0.199722 |
| 0 | 0139 | 0.021088 | 0.135439 | 0.702621 |
| 0 | 0140 | 0.520461 | 0.141005 | 0.779873 |
| 0 | 0141 | 0.019406 | 0.642532 | 0.287630 |
| 0 | 0142 | 0.523732 | 0.356393 | 0.788069 |
| 0 | 0143 | 0.012839 | 0.853210 | 0.291660 |
| 0 | 0144 | 0.391106 | 0.833215 | 0.267323 |
| 0 | 0145 | 0.142075 | 0.334174 | 0.771690 |
| 0 | 0146 | 0.399213 | 0.659998 | 0.287865 |
| 0 | 0147 | 0.137930 | 0.156724 | 0.780872 |
| 0 | 0148 | 0.643270 | 0.155751 | 0.723574 |
| 0 | 0149 | 0.902457 | 0.651990 | 0.213523 |
| 0 | 0150 | 0.636885 | 0.329733 | 0.701103 |
| 0 | 0151 | 0.895952 | 0.836235 | 0.214101 |
| 0 | 0152 | 0.448462 | 0.742059 | 0.153164 |
| 0 | 0153 | 0.088481 | 0.243649 | 0.652501 |
| 0 | 0154 | 0.588870 | 0.247029 | 0.838250 |

|   |      |          |          |          |
|---|------|----------|----------|----------|
| 0 | 0155 | 0.943351 | 0.745296 | 0.339365 |
| 0 | 0156 | 0.323349 | 0.831097 | 0.429564 |
| 0 | 0157 | 0.206434 | 0.335472 | 0.937175 |
| 0 | 0158 | 0.333940 | 0.645423 | 0.455676 |
| 0 | 0159 | 0.203074 | 0.143067 | 0.949250 |
| 0 | 0160 | 0.715582 | 0.164496 | 0.565418 |
| 0 | 0161 | 0.831986 | 0.659968 | 0.053376 |
| 0 | 0162 | 0.704817 | 0.353907 | 0.536578 |
| 0 | 0163 | 0.830835 | 0.847104 | 0.045415 |
| 0 | 0164 | 0.263231 | 0.861601 | 0.260612 |
| 0 | 0165 | 0.270850 | 0.356986 | 0.768792 |
| 0 | 0166 | 0.267880 | 0.669870 | 0.291318 |
| 0 | 0167 | 0.269059 | 0.170145 | 0.785847 |
| 0 | 0168 | 0.771386 | 0.128418 | 0.735516 |
| 0 | 0169 | 0.774141 | 0.630549 | 0.225064 |
| 0 | 0170 | 0.768193 | 0.318996 | 0.698135 |
| 0 | 0171 | 0.765627 | 0.820396 | 0.209676 |
| 0 | 0172 | 0.296615 | 0.746833 | 0.572691 |
| 0 | 0173 | 0.240253 | 0.243836 | 0.067323 |
| 0 | 0174 | 0.741221 | 0.250279 | 0.423460 |
| 0 | 0175 | 0.793810 | 0.748258 | 0.921952 |
| 0 | 0176 | 0.212352 | 0.844259 | 0.529796 |
| 0 | 0177 | 0.323908 | 0.340357 | 0.019044 |
| 0 | 0178 | 0.214925 | 0.645267 | 0.535131 |
| 0 | 0179 | 0.323690 | 0.145370 | 0.021520 |
| 0 | 0180 | 0.822342 | 0.148056 | 0.456270 |
| 0 | 0181 | 0.714109 | 0.648655 | 0.969597 |
| 0 | 0182 | 0.827178 | 0.346072 | 0.469635 |
| 0 | 0183 | 0.710403 | 0.845545 | 0.973498 |
| 0 | 0184 | 0.130872 | 0.743434 | 0.574074 |
| 0 | 0185 | 0.406219 | 0.242525 | 0.073512 |
| 0 | 0186 | 0.908223 | 0.246296 | 0.422542 |
| 0 | 0187 | 0.629970 | 0.746744 | 0.921668 |
| 0 | 0188 | 0.102114 | 0.825602 | 0.428365 |
| 0 | 0189 | 0.440445 | 0.327634 | 0.933693 |
| 0 | 0190 | 0.107319 | 0.658293 | 0.427994 |
| 0 | 0191 | 0.435320 | 0.162601 | 0.923907 |
| 0 | 0192 | 0.926547 | 0.165825 | 0.573195 |
| 0 | 0193 | 0.599586 | 0.662386 | 0.063673 |
| 0 | 0194 | 0.941826 | 0.336005 | 0.559486 |
| 0 | 0195 | 0.596799 | 0.831224 | 0.065773 |
| 0 | 0196 | 0.136238 | 0.838028 | 0.238252 |
| 0 | 0197 | 0.398739 | 0.342377 | 0.746713 |
| 0 | 0198 | 0.142443 | 0.664040 | 0.238515 |

|    |       |          |          |          |
|----|-------|----------|----------|----------|
| O  | O199  | 0.395677 | 0.162911 | 0.735969 |
| O  | O200  | 0.899044 | 0.146051 | 0.763580 |
| O  | O201  | 0.634694 | 0.641233 | 0.252775 |
| O  | O202  | 0.895169 | 0.322315 | 0.742921 |
| O  | O203  | 0.638378 | 0.826473 | 0.252825 |
| O  | O204  | 0.222054 | 0.753816 | 0.159442 |
| O  | O205  | 0.318836 | 0.256071 | 0.660113 |
| O  | O206  | 0.815473 | 0.237112 | 0.831111 |
| O  | O207  | 0.714892 | 0.740878 | 0.346537 |
| O  | O208  | 0.755842 | 0.771200 | 0.600192 |
| Al | Al209 | 0.711369 | 0.656295 | 0.300000 |
| Si | Si210 | 0.436920 | 0.049636 | 0.175132 |
| Si | Si211 | 0.096083 | 0.551522 | 0.679629 |
| Si | Si212 | 0.447492 | 0.439223 | 0.169727 |
| Si | Si213 | 0.087930 | 0.940216 | 0.664768 |
| Si | Si214 | 0.596777 | 0.940780 | 0.819136 |
| Si | Si215 | 0.942434 | 0.437681 | 0.309299 |
| Si | Si216 | 0.589732 | 0.550729 | 0.824468 |
| Si | Si217 | 0.947865 | 0.048413 | 0.335045 |
| Si | Si218 | 0.333940 | 0.027371 | 0.335856 |
| Si | Si219 | 0.199310 | 0.529125 | 0.839251 |
| Si | Si220 | 0.335358 | 0.473318 | 0.320327 |
| Si | Si221 | 0.203964 | 0.971943 | 0.812752 |
| Si | Si222 | 0.702256 | 0.966176 | 0.660693 |
| Si | Si223 | 0.840531 | 0.463084 | 0.146836 |
| Si | Si224 | 0.703118 | 0.516702 | 0.677098 |
| Si | Si225 | 0.828428 | 0.020413 | 0.188130 |
| Si | Si226 | 0.297213 | 0.059101 | 0.552691 |
| Si | Si227 | 0.238438 | 0.555615 | 0.055862 |
| Si | Si228 | 0.294099 | 0.440730 | 0.535274 |
| Si | Si229 | 0.241352 | 0.936622 | 0.028502 |
| Si | Si230 | 0.738042 | 0.936371 | 0.445065 |
| Si | Si231 | 0.799977 | 0.434192 | 0.933550 |
| Si | Si232 | 0.745943 | 0.552073 | 0.463895 |
| Si | Si233 | 0.793655 | 0.056037 | 0.972892 |
| Si | Si234 | 0.142502 | 0.057252 | 0.530616 |
| Si | Si235 | 0.391834 | 0.556668 | 0.036015 |
| Si | Si236 | 0.140524 | 0.432237 | 0.535978 |
| Si | Si237 | 0.394930 | 0.929199 | 0.032380 |
| Si | Si238 | 0.892710 | 0.931456 | 0.464812 |
| Si | Si239 | 0.645730 | 0.431694 | 0.954123 |
| Si | Si240 | 0.898786 | 0.555083 | 0.456858 |
| Si | Si241 | 0.639103 | 0.060492 | 0.964542 |
| Si | Si242 | 0.096016 | 0.022839 | 0.318759 |

|    |       |          |          |          |
|----|-------|----------|----------|----------|
| Si | Si243 | 0.440777 | 0.525075 | 0.825623 |
| Si | Si244 | 0.091665 | 0.469645 | 0.324369 |
| Si | Si245 | 0.447133 | 0.971039 | 0.823856 |
| Si | Si246 | 0.938121 | 0.966308 | 0.675616 |
| Si | Si247 | 0.596879 | 0.462998 | 0.163938 |
| Si | Si248 | 0.947338 | 0.520131 | 0.668152 |
| Si | Si249 | 0.586540 | 0.020648 | 0.173681 |
| Si | Si250 | 0.216218 | 0.052147 | 0.188102 |
| Si | Si251 | 0.319112 | 0.555719 | 0.694783 |
| Si | Si252 | 0.210705 | 0.432434 | 0.194120 |
| Si | Si253 | 0.329469 | 0.935595 | 0.688085 |
| Si | Si254 | 0.819919 | 0.941495 | 0.812290 |
| Si | Si255 | 0.720645 | 0.441028 | 0.294671 |
| Si | Si256 | 0.828612 | 0.559510 | 0.799098 |
| Si | Si257 | 0.702246 | 0.059984 | 0.312984 |
| Si | Si258 | 0.442878 | 0.820661 | 0.178213 |
| Si | Si259 | 0.092315 | 0.322097 | 0.679902 |
| Si | Si260 | 0.440328 | 0.664475 | 0.184292 |
| Si | Si261 | 0.093717 | 0.165536 | 0.681165 |
| Si | Si262 | 0.592348 | 0.168254 | 0.813628 |
| Si | Si263 | 0.945143 | 0.666652 | 0.311740 |
| Si | Si264 | 0.595942 | 0.324084 | 0.804821 |
| Si | Si265 | 0.939903 | 0.823889 | 0.313227 |
| Si | Si266 | 0.330669 | 0.868722 | 0.324223 |
| Si | Si267 | 0.202789 | 0.369221 | 0.828629 |
| Si | Si268 | 0.331843 | 0.632027 | 0.336919 |
| Si | Si269 | 0.205853 | 0.130435 | 0.830329 |
| Si | Si270 | 0.705617 | 0.123369 | 0.667416 |
| Si | Si271 | 0.838310 | 0.620973 | 0.158613 |
| Si | Si272 | 0.704933 | 0.359838 | 0.656695 |
| Si | Si273 | 0.827979 | 0.861336 | 0.163878 |
| Si | Si274 | 0.289568 | 0.823541 | 0.537559 |
| Si | Si275 | 0.247014 | 0.321667 | 0.038171 |
| Si | Si276 | 0.291156 | 0.667587 | 0.552378 |
| Si | Si277 | 0.247361 | 0.165105 | 0.044576 |
| Si | Si278 | 0.746003 | 0.172694 | 0.455093 |
| Si | Si279 | 0.790628 | 0.670328 | 0.952676 |
| Si | Si280 | 0.750508 | 0.329104 | 0.444234 |
| Si | Si281 | 0.786717 | 0.826293 | 0.949299 |
| Si | Si282 | 0.135985 | 0.820278 | 0.537153 |
| Si | Si283 | 0.400436 | 0.319679 | 0.037442 |
| Si | Si284 | 0.137738 | 0.666498 | 0.538000 |
| Si | Si285 | 0.400689 | 0.166663 | 0.032005 |
| Si | Si286 | 0.899417 | 0.169914 | 0.459918 |

|    |       |          |          |          |
|----|-------|----------|----------|----------|
| Si | Si287 | 0.636928 | 0.669613 | 0.958285 |
| Si | Si288 | 0.903827 | 0.324050 | 0.455384 |
| Si | Si289 | 0.633821 | 0.823426 | 0.959947 |
| Si | Si290 | 0.088344 | 0.865329 | 0.325434 |
| Si | Si291 | 0.449992 | 0.368103 | 0.830231 |
| Si | Si292 | 0.094675 | 0.628018 | 0.318309 |
| Si | Si293 | 0.445207 | 0.129054 | 0.815382 |
| Si | Si294 | 0.945114 | 0.123046 | 0.671670 |
| Si | Si295 | 0.587030 | 0.619186 | 0.164888 |
| Si | Si296 | 0.946247 | 0.362607 | 0.672964 |
| Si | Si297 | 0.588524 | 0.862607 | 0.175957 |
| Si | Si298 | 0.207803 | 0.831187 | 0.186231 |
| Si | Si299 | 0.328134 | 0.333132 | 0.692945 |
| Si | Si300 | 0.216498 | 0.677855 | 0.199334 |
| Si | Si301 | 0.322160 | 0.179281 | 0.696289 |
| Si | Si302 | 0.826693 | 0.158509 | 0.810501 |
| Si | Si303 | 0.821823 | 0.311813 | 0.787160 |
| Si | Si304 | 0.711295 | 0.815418 | 0.297786 |
| Zn | Zn305 | 0.710789 | 0.716757 | 0.493683 |

**M-C<sub>4</sub>H<sub>9</sub>Zn-OH<sub>2</sub>-ZnOH<sup>+</sup> (Fig. 5/M2)** Total energy = -1938.95629429 eV

data\_

\_audit\_creation\_method 'Materials Studio'

\_cell\_length\_a 20.357621

\_cell\_length\_b 20.050598

\_cell\_length\_c 13.476578

\_cell\_angle\_alpha 90.000000

\_cell\_angle\_beta 90.000000

\_cell\_angle\_gamma 90.000000

\_symmetry\_space\_group\_name\_H-M 'P1'

loop\_

\_atom\_site\_type\_symbol

\_atom\_site\_label

\_atom\_site\_fract\_x

\_atom\_site\_fract\_y

\_atom\_site\_fract\_z

|   |    |          |          |          |
|---|----|----------|----------|----------|
| H | H1 | 0.791891 | 0.731885 | 0.526176 |
| H | H2 | 0.457947 | 0.768866 | 0.788556 |
| H | H3 | 0.380597 | 0.754455 | 0.732027 |
| H | H4 | 0.429971 | 0.821876 | 0.692545 |
| H | H5 | 0.435873 | 0.726657 | 0.571226 |
| H | H6 | 0.463942 | 0.673451 | 0.665969 |
| H | H7 | 0.563612 | 0.746272 | 0.687517 |

|   |     |          |          |          |
|---|-----|----------|----------|----------|
| H | H8  | 0.535733 | 0.798114 | 0.591103 |
| H | H9  | 0.568111 | 0.648543 | 0.569225 |
| H | H10 | 0.758576 | 0.762226 | 0.620321 |
| H | H11 | 0.539174 | 0.699648 | 0.472464 |
| C | C12 | 0.431240 | 0.770092 | 0.717903 |
| C | C13 | 0.464310 | 0.725537 | 0.640632 |
| C | C14 | 0.535421 | 0.746346 | 0.617988 |
| C | C15 | 0.567517 | 0.700135 | 0.541933 |
| O | O16 | 0.489263 | 0.028534 | 0.215744 |
| O | O17 | 0.995974 | 0.530957 | 0.714044 |
| O | O18 | 0.501565 | 0.433872 | 0.208098 |
| O | O19 | 0.982353 | 0.933173 | 0.706750 |
| O | O20 | 0.487086 | 0.944945 | 0.792569 |
| O | O21 | 0.996491 | 0.451236 | 0.292052 |
| O | O22 | 0.490370 | 0.539205 | 0.792862 |
| O | O23 | 0.993263 | 0.036758 | 0.292089 |
| O | O24 | 0.372952 | 0.057460 | 0.290534 |
| O | O25 | 0.112813 | 0.558476 | 0.787026 |
| O | O26 | 0.382588 | 0.441987 | 0.283856 |
| O | O27 | 0.099325 | 0.942079 | 0.787873 |
| O | O28 | 0.600467 | 0.941296 | 0.703150 |
| O | O29 | 0.881207 | 0.434163 | 0.208096 |
| O | O30 | 0.610803 | 0.537323 | 0.727053 |
| O | O31 | 0.873469 | 0.040081 | 0.220808 |
| O | O32 | 0.411972 | 0.114926 | 0.122716 |
| O | O33 | 0.072977 | 0.617074 | 0.621296 |
| O | O34 | 0.407096 | 0.359976 | 0.133527 |
| O | O35 | 0.079994 | 0.861197 | 0.634670 |
| O | O36 | 0.579710 | 0.859856 | 0.853176 |
| O | O37 | 0.911811 | 0.364901 | 0.368034 |
| O | O38 | 0.578411 | 0.616246 | 0.878032 |
| O | O39 | 0.906097 | 0.115896 | 0.376477 |
| O | O40 | 0.380190 | 0.986563 | 0.126257 |
| O | O41 | 0.103596 | 0.488137 | 0.621155 |
| O | O42 | 0.407063 | 0.490629 | 0.102854 |
| O | O43 | 0.078436 | 0.991932 | 0.606832 |
| O | O44 | 0.594543 | 0.989297 | 0.886011 |
| O | O45 | 0.887724 | 0.495095 | 0.381607 |
| O | O46 | 0.582208 | 0.484154 | 0.903378 |
| O | O47 | 0.896947 | 0.984345 | 0.396797 |
| O | O48 | 0.311709 | 0.041307 | 0.461955 |
| O | O49 | 0.172579 | 0.542760 | 0.959477 |
| O | O50 | 0.316583 | 0.448236 | 0.451816 |
| O | O51 | 0.167558 | 0.949622 | 0.952796 |

|   |     |          |          |          |
|---|-----|----------|----------|----------|
| 0 | 052 | 0.667043 | 0.925714 | 0.539614 |
| 0 | 053 | 0.815490 | 0.423694 | 0.041766 |
| 0 | 054 | 0.678406 | 0.529088 | 0.562348 |
| 0 | 055 | 0.807532 | 0.030858 | 0.051905 |
| 0 | 056 | 0.314468 | 0.943089 | 0.328453 |
| 0 | 057 | 0.170934 | 0.444470 | 0.825377 |
| 0 | 058 | 0.304155 | 0.545247 | 0.317472 |
| 0 | 059 | 0.180868 | 0.043908 | 0.813627 |
| 0 | 060 | 0.680392 | 0.038133 | 0.643300 |
| 0 | 061 | 0.823595 | 0.540997 | 0.129551 |
| 0 | 062 | 0.690882 | 0.433740 | 0.698269 |
| 0 | 063 | 0.800329 | 0.932860 | 0.184505 |
| 0 | 064 | 0.242031 | 0.051014 | 0.298167 |
| 0 | 065 | 0.243485 | 0.552637 | 0.796643 |
| 0 | 066 | 0.252597 | 0.427783 | 0.283334 |
| 0 | 067 | 0.228782 | 0.924512 | 0.782139 |
| 0 | 068 | 0.731131 | 0.925177 | 0.708848 |
| 0 | 069 | 0.750409 | 0.444406 | 0.207753 |
| 0 | 070 | 0.739552 | 0.553711 | 0.732097 |
| 0 | 071 | 0.743901 | 0.049158 | 0.221271 |
| 0 | 072 | 0.278327 | 0.122872 | 0.607690 |
| 0 | 073 | 0.208096 | 0.618893 | 0.110301 |
| 0 | 074 | 0.297067 | 0.371318 | 0.606803 |
| 0 | 075 | 0.187159 | 0.868012 | 0.102966 |
| 0 | 076 | 0.687792 | 0.868595 | 0.368276 |
| 0 | 077 | 0.785719 | 0.355769 | 0.882036 |
| 0 | 078 | 0.698371 | 0.623151 | 0.428417 |
| 0 | 079 | 0.786359 | 0.113567 | 0.903134 |
| 0 | 080 | 0.190832 | 0.037057 | 0.534464 |
| 0 | 081 | 0.292256 | 0.531177 | 0.035233 |
| 0 | 082 | 0.194924 | 0.427852 | 0.513039 |
| 0 | 083 | 0.288585 | 0.930027 | 0.015523 |
| 0 | 084 | 0.785144 | 0.932976 | 0.459171 |
| 0 | 085 | 0.698718 | 0.440562 | 0.957517 |
| 0 | 086 | 0.799227 | 0.552215 | 0.499482 |
| 0 | 087 | 0.685777 | 0.051857 | 0.991792 |
| 0 | 088 | 0.291377 | 0.994251 | 0.642356 |
| 0 | 089 | 0.188679 | 0.489160 | 0.136410 |
| 0 | 090 | 0.274211 | 0.500791 | 0.621493 |
| 0 | 091 | 0.205136 | 0.997167 | 0.127614 |
| 0 | 092 | 0.685611 | 0.000286 | 0.381709 |
| 0 | 093 | 0.806383 | 0.485825 | 0.869091 |
| 0 | 094 | 0.712977 | 0.496544 | 0.378806 |
| 0 | 095 | 0.766009 | 0.985285 | 0.876290 |



|   |      |          |          |          |
|---|------|----------|----------|----------|
| 0 | 096  | 0.102334 | 0.122477 | 0.603942 |
| 0 | 097  | 0.377724 | 0.620458 | 0.102743 |
| 0 | 098  | 0.103053 | 0.355912 | 0.599690 |
| 0 | 099  | 0.381696 | 0.855465 | 0.095376 |
| 0 | 0100 | 0.879287 | 0.852144 | 0.395555 |
| 0 | 0101 | 0.607871 | 0.353796 | 0.897666 |
| 0 | 0102 | 0.887807 | 0.626789 | 0.406330 |
| 0 | 0103 | 0.591101 | 0.121131 | 0.904878 |
| 0 | 0104 | 0.078887 | 0.057669 | 0.437487 |
| 0 | 0105 | 0.401200 | 0.557758 | 0.934313 |
| 0 | 0106 | 0.071203 | 0.432950 | 0.449553 |
| 0 | 0107 | 0.412043 | 0.937692 | 0.950806 |
| 0 | 0108 | 0.893606 | 0.915623 | 0.564569 |
| 0 | 0109 | 0.593556 | 0.415236 | 0.069533 |
| 0 | 0110 | 0.922897 | 0.548154 | 0.555034 |
| 0 | 0111 | 0.564080 | 0.044295 | 0.058606 |
| 0 | 0112 | 0.116601 | 0.051597 | 0.248266 |
| 0 | 0113 | 0.367937 | 0.541848 | 0.743938 |
| 0 | 0114 | 0.122102 | 0.420651 | 0.269313 |
| 0 | 0115 | 0.359413 | 0.924689 | 0.772270 |
| 0 | 0116 | 0.857395 | 0.949332 | 0.747601 |
| 0 | 0117 | 0.624469 | 0.447826 | 0.255482 |
| 0 | 0118 | 0.869837 | 0.558190 | 0.735673 |
| 0 | 0119 | 0.614549 | 0.057964 | 0.240158 |
| 0 | 0120 | 0.080000 | 0.942267 | 0.342598 |
| 0 | 0121 | 0.411044 | 0.439711 | 0.849168 |
| 0 | 0122 | 0.089464 | 0.539818 | 0.337956 |
| 0 | 0123 | 0.401999 | 0.042247 | 0.832046 |
| 0 | 0124 | 0.917194 | 0.036799 | 0.631728 |
| 0 | 0125 | 0.568475 | 0.536494 | 0.133789 |
| 0 | 0126 | 0.905369 | 0.440288 | 0.665767 |
| 0 | 0127 | 0.582353 | 0.938390 | 0.174549 |
| 0 | 0128 | 0.198721 | 0.127789 | 0.151922 |
| 0 | 0129 | 0.293072 | 0.628889 | 0.653875 |
| 0 | 0130 | 0.197508 | 0.355873 | 0.145247 |
| 0 | 0131 | 0.289960 | 0.861309 | 0.639498 |
| 0 | 0132 | 0.792292 | 0.858040 | 0.847129 |
| 0 | 0133 | 0.704483 | 0.366595 | 0.349742 |
| 0 | 0134 | 0.801045 | 0.619019 | 0.872444 |
| 0 | 0135 | 0.690537 | 0.130312 | 0.354299 |
| 0 | 0136 | 0.491404 | 0.845884 | 0.203374 |
| 0 | 0137 | 0.996077 | 0.350117 | 0.713382 |
| 0 | 0138 | 0.489017 | 0.629639 | 0.206006 |
| 0 | 0139 | 0.992088 | 0.132099 | 0.710153 |

|   |      |          |          |          |
|---|------|----------|----------|----------|
| 0 | 0140 | 0.489805 | 0.134865 | 0.780989 |
| 0 | 0141 | 0.995547 | 0.626978 | 0.293284 |
| 0 | 0142 | 0.497486 | 0.347952 | 0.790759 |
| 0 | 0143 | 0.990550 | 0.852598 | 0.289643 |
| 0 | 0144 | 0.376185 | 0.829412 | 0.287798 |
| 0 | 0145 | 0.112922 | 0.328136 | 0.791217 |
| 0 | 0146 | 0.375896 | 0.654215 | 0.293793 |
| 0 | 0147 | 0.106157 | 0.151581 | 0.796799 |
| 0 | 0148 | 0.608676 | 0.139815 | 0.710914 |
| 0 | 0149 | 0.883152 | 0.645724 | 0.208904 |
| 0 | 0150 | 0.611694 | 0.328797 | 0.703445 |
| 0 | 0151 | 0.877489 | 0.826652 | 0.202206 |
| 0 | 0152 | 0.420543 | 0.738533 | 0.158947 |
| 0 | 0153 | 0.062027 | 0.239972 | 0.665629 |
| 0 | 0154 | 0.566452 | 0.238106 | 0.828955 |
| 0 | 0155 | 0.928779 | 0.739315 | 0.330805 |
| 0 | 0156 | 0.306159 | 0.839564 | 0.448812 |
| 0 | 0157 | 0.180429 | 0.345070 | 0.953422 |
| 0 | 0158 | 0.308413 | 0.638563 | 0.458845 |
| 0 | 0159 | 0.177887 | 0.134244 | 0.957953 |
| 0 | 0160 | 0.677856 | 0.153120 | 0.548639 |
| 0 | 0161 | 0.805302 | 0.661612 | 0.058380 |
| 0 | 0162 | 0.682072 | 0.351373 | 0.542203 |
| 0 | 0163 | 0.806475 | 0.840742 | 0.040338 |
| 0 | 0164 | 0.245729 | 0.838323 | 0.274266 |
| 0 | 0165 | 0.243466 | 0.340275 | 0.781589 |
| 0 | 0166 | 0.244615 | 0.660428 | 0.291302 |
| 0 | 0167 | 0.236599 | 0.161332 | 0.787351 |
| 0 | 0168 | 0.738603 | 0.141819 | 0.723010 |
| 0 | 0169 | 0.755078 | 0.629550 | 0.234459 |
| 0 | 0170 | 0.742069 | 0.313169 | 0.706378 |
| 0 | 0171 | 0.747194 | 0.814394 | 0.210537 |
| 0 | 0172 | 0.269718 | 0.742271 | 0.568161 |
| 0 | 0173 | 0.216472 | 0.240386 | 0.060113 |
| 0 | 0174 | 0.715184 | 0.248474 | 0.426340 |
| 0 | 0175 | 0.768305 | 0.741801 | 0.916314 |
| 0 | 0176 | 0.185929 | 0.839720 | 0.523343 |
| 0 | 0177 | 0.300899 | 0.338343 | 0.024873 |
| 0 | 0178 | 0.188835 | 0.640211 | 0.536681 |
| 0 | 0179 | 0.299349 | 0.139337 | 0.027668 |
| 0 | 0180 | 0.795898 | 0.147560 | 0.468396 |
| 0 | 0181 | 0.689441 | 0.642814 | 0.970632 |
| 0 | 0182 | 0.803405 | 0.341419 | 0.474071 |
| 0 | 0183 | 0.686788 | 0.840916 | 0.964493 |

|    |       |          |          |          |
|----|-------|----------|----------|----------|
| O  | O184  | 0.106050 | 0.740231 | 0.576978 |
| O  | O185  | 0.380269 | 0.238199 | 0.078376 |
| O  | O186  | 0.883304 | 0.242194 | 0.420027 |
| O  | O187  | 0.605681 | 0.740708 | 0.921725 |
| O  | O188  | 0.067918 | 0.829825 | 0.443156 |
| O  | O189  | 0.418154 | 0.324927 | 0.942262 |
| O  | O190  | 0.079976 | 0.655604 | 0.433202 |
| O  | O191  | 0.412456 | 0.154385 | 0.934531 |
| O  | O192  | 0.907996 | 0.159009 | 0.565554 |
| O  | O193  | 0.575916 | 0.658691 | 0.066707 |
| O  | O194  | 0.920472 | 0.330601 | 0.556998 |
| O  | O195  | 0.567860 | 0.838924 | 0.045003 |
| O  | O196  | 0.116645 | 0.828490 | 0.259177 |
| O  | O197  | 0.371615 | 0.329738 | 0.756878 |
| O  | O198  | 0.118319 | 0.651871 | 0.244812 |
| O  | O199  | 0.364073 | 0.154884 | 0.750135 |
| O  | O200  | 0.866266 | 0.129344 | 0.749537 |
| O  | O201  | 0.614537 | 0.632018 | 0.252906 |
| O  | O202  | 0.870476 | 0.323755 | 0.738827 |
| O  | O203  | 0.617388 | 0.815697 | 0.223148 |
| O  | O204  | 0.192716 | 0.744018 | 0.161779 |
| O  | O205  | 0.291621 | 0.246846 | 0.663381 |
| O  | O206  | 0.802268 | 0.231645 | 0.829991 |
| O  | O207  | 0.687344 | 0.738734 | 0.343226 |
| O  | O208  | 0.751691 | 0.751985 | 0.550798 |
| Al | Al209 | 0.688831 | 0.653135 | 0.304614 |
| Si | Si210 | 0.413927 | 0.047070 | 0.188113 |
| Si | Si211 | 0.071332 | 0.548516 | 0.685167 |
| Si | Si212 | 0.424088 | 0.431952 | 0.182001 |
| Si | Si213 | 0.060561 | 0.932248 | 0.683690 |
| Si | Si214 | 0.564885 | 0.933937 | 0.810147 |
| Si | Si215 | 0.919529 | 0.436423 | 0.313125 |
| Si | Si216 | 0.566376 | 0.544316 | 0.826504 |
| Si | Si217 | 0.916748 | 0.044575 | 0.321892 |
| Si | Si218 | 0.310211 | 0.022984 | 0.344891 |
| Si | Si219 | 0.175140 | 0.524353 | 0.842586 |
| Si | Si220 | 0.314197 | 0.465696 | 0.334392 |
| Si | Si221 | 0.169206 | 0.964943 | 0.834860 |
| Si | Si222 | 0.669522 | 0.958296 | 0.649577 |
| Si | Si223 | 0.817535 | 0.461555 | 0.148105 |
| Si | Si224 | 0.679915 | 0.513207 | 0.679813 |
| Si | Si225 | 0.806362 | 0.013211 | 0.169453 |
| Si | Si226 | 0.267789 | 0.049043 | 0.561673 |
| Si | Si227 | 0.215554 | 0.545732 | 0.060778 |

|    |       |          |          |          |
|----|-------|----------|----------|----------|
| Si | Si228 | 0.270836 | 0.436751 | 0.548776 |
| Si | Si229 | 0.212209 | 0.936008 | 0.050317 |
| Si | Si230 | 0.706989 | 0.931796 | 0.435807 |
| Si | Si231 | 0.776247 | 0.426544 | 0.937382 |
| Si | Si232 | 0.721876 | 0.550505 | 0.466683 |
| Si | Si233 | 0.761763 | 0.045604 | 0.955852 |
| Si | Si234 | 0.112907 | 0.052320 | 0.545973 |
| Si | Si235 | 0.369637 | 0.550173 | 0.044300 |
| Si | Si236 | 0.118257 | 0.426617 | 0.546208 |
| Si | Si237 | 0.365511 | 0.927606 | 0.047118 |
| Si | Si238 | 0.863695 | 0.921605 | 0.453141 |
| Si | Si239 | 0.620821 | 0.423240 | 0.957036 |
| Si | Si240 | 0.874449 | 0.555151 | 0.459686 |
| Si | Si241 | 0.608861 | 0.051601 | 0.959797 |
| Si | Si242 | 0.067037 | 0.021873 | 0.330645 |
| Si | Si243 | 0.417687 | 0.519446 | 0.830915 |
| Si | Si244 | 0.069695 | 0.461184 | 0.336416 |
| Si | Si245 | 0.415112 | 0.962573 | 0.836270 |
| Si | Si246 | 0.912694 | 0.958702 | 0.662826 |
| Si | Si247 | 0.572237 | 0.458856 | 0.166661 |
| Si | Si248 | 0.923337 | 0.519240 | 0.668206 |
| Si | Si249 | 0.562681 | 0.017119 | 0.172448 |
| Si | Si250 | 0.190757 | 0.056303 | 0.206414 |
| Si | Si251 | 0.294549 | 0.555522 | 0.704286 |
| Si | Si252 | 0.190498 | 0.424132 | 0.208205 |
| Si | Si253 | 0.292097 | 0.926847 | 0.708789 |
| Si | Si254 | 0.786985 | 0.930410 | 0.794569 |
| Si | Si255 | 0.698101 | 0.439184 | 0.297624 |
| Si | Si256 | 0.804076 | 0.553349 | 0.803190 |
| Si | Si257 | 0.683842 | 0.058942 | 0.298994 |
| Si | Si258 | 0.417736 | 0.816901 | 0.186508 |
| Si | Si259 | 0.068236 | 0.318356 | 0.692605 |
| Si | Si260 | 0.416660 | 0.660544 | 0.190122 |
| Si | Si261 | 0.065479 | 0.161690 | 0.693959 |
| Si | Si262 | 0.564046 | 0.158993 | 0.806338 |
| Si | Si263 | 0.923636 | 0.659872 | 0.309258 |
| Si | Si264 | 0.570552 | 0.317127 | 0.805701 |
| Si | Si265 | 0.919356 | 0.817366 | 0.304084 |
| Si | Si266 | 0.310398 | 0.862690 | 0.334258 |
| Si | Si267 | 0.177158 | 0.364543 | 0.837373 |
| Si | Si268 | 0.308563 | 0.624520 | 0.340387 |
| Si | Si269 | 0.175272 | 0.122842 | 0.839050 |
| Si | Si270 | 0.676369 | 0.118318 | 0.656922 |
| Si | Si271 | 0.814853 | 0.619145 | 0.160178 |

|    |       |          |          |          |
|----|-------|----------|----------|----------|
| Si | Si272 | 0.681388 | 0.356816 | 0.662227 |
| Si | Si273 | 0.807914 | 0.853859 | 0.159026 |
| Si | Si274 | 0.262585 | 0.820697 | 0.544972 |
| Si | Si275 | 0.224203 | 0.319753 | 0.046135 |
| Si | Si276 | 0.265029 | 0.662729 | 0.553433 |
| Si | Si277 | 0.223266 | 0.160818 | 0.048975 |
| Si | Si278 | 0.719846 | 0.169722 | 0.449354 |
| Si | Si279 | 0.765776 | 0.665314 | 0.955062 |
| Si | Si280 | 0.726307 | 0.326802 | 0.448420 |
| Si | Si281 | 0.763226 | 0.820017 | 0.943841 |
| Si | Si282 | 0.109936 | 0.817877 | 0.544171 |
| Si | Si283 | 0.376818 | 0.315771 | 0.044521 |
| Si | Si284 | 0.112170 | 0.663057 | 0.542343 |
| Si | Si285 | 0.376011 | 0.161500 | 0.041022 |
| Si | Si286 | 0.873545 | 0.165768 | 0.457125 |
| Si | Si287 | 0.612227 | 0.664077 | 0.960299 |
| Si | Si288 | 0.879642 | 0.319785 | 0.454729 |
| Si | Si289 | 0.610045 | 0.819592 | 0.946932 |
| Si | Si290 | 0.064206 | 0.863248 | 0.333242 |
| Si | Si291 | 0.424273 | 0.360690 | 0.834357 |
| Si | Si292 | 0.071103 | 0.618318 | 0.327383 |
| Si | Si293 | 0.416806 | 0.121478 | 0.824609 |
| Si | Si294 | 0.920446 | 0.114689 | 0.664639 |
| Si | Si295 | 0.563575 | 0.614688 | 0.167501 |
| Si | Si296 | 0.922956 | 0.361321 | 0.668525 |
| Si | Si297 | 0.564711 | 0.859696 | 0.161456 |
| Si | Si298 | 0.185668 | 0.820320 | 0.199963 |
| Si | Si299 | 0.300906 | 0.322719 | 0.702422 |
| Si | Si300 | 0.191079 | 0.667893 | 0.202087 |
| Si | Si301 | 0.292732 | 0.170459 | 0.702274 |
| Si | Si302 | 0.798331 | 0.153770 | 0.800514 |
| Si | Si303 | 0.800171 | 0.307290 | 0.789122 |
| Si | Si304 | 0.685066 | 0.809822 | 0.286333 |
| Zn | Zn305 | 0.657823 | 0.715122 | 0.496428 |

**TS-C<sub>4</sub>H<sub>9</sub>ZnOH<sub>2</sub>-HTransfer-Concerted-ZnOH<sup>+</sup> (Fig. 5/TS2)**

Total energy = -1936.97142925 eV

data\_

|                        |                    |
|------------------------|--------------------|
| _audit_creation_method | 'Materials Studio' |
| _cell_length_a         | 20.357621          |
| _cell_length_b         | 20.050598          |
| _cell_length_c         | 13.476578          |
| _cell_angle_alpha      | 90.000000          |

```

_cell_angle_beta      90.000000
_cell_angle_gamma     90.000000
_symmetry_space_group_name_H-M  'P1'
loop_
_atom_site_type_symbol
_atom_site_label
_atom_site_fract_x
_atom_site_fract_y
_atom_site_fract_z
  H      H1      0.693205      0.779508      0.608478
  H      H2      0.603255      0.755842      0.640295
  H      H3      0.527605      0.653005      0.462027
  H      H4      0.533064      0.734386      0.403295
  H      H5      0.494607      0.787882      0.550246
  H      H6      0.493695      0.647459      0.643298
  H      H7      0.424622      0.681923      0.585858
  H      H8      0.491439      0.739490      0.772061
  H      H9      0.414682      0.698077      0.766688
  H      H10     0.423924      0.777003      0.710026
  H      H11     0.561621      0.760712      0.637069
  C      C12     0.539281      0.705824      0.471704
  C      C13     0.509245      0.735685      0.557080
  C      C14     0.468960      0.694998      0.628531
  C      C15     0.448785      0.729551      0.724967
  O      O16     0.487347      0.026506      0.212497
  O      O17     0.997650      0.529794      0.709968
  O      O18     0.501925      0.434715      0.206064
  O      O19     0.985131      0.938549      0.701283
  O      O20     0.492146      0.952154      0.788909
  O      O21     0.995995      0.457182      0.293406
  O      O22     0.490648      0.540788      0.791105
  O      O23     0.996772      0.038780      0.292853
  O      O24     0.369886      0.056475      0.281955
  O      O25     0.113614      0.556487      0.787854
  O      O26     0.381799      0.451499      0.274343
  O      O27     0.106331      0.955634      0.764830
  O      O28     0.608006      0.942214      0.708397
  O      O29     0.881234      0.433140      0.209917
  O      O30     0.611663      0.534257      0.726698
  O      O31     0.872159      0.036959      0.240751
  O      O32     0.411730      0.110849      0.113643
  O      O33     0.077571      0.614552      0.620229
  O      O34     0.406146      0.360095      0.136498
  O      O35     0.079571      0.864393      0.627657

```

|   |     |          |          |          |
|---|-----|----------|----------|----------|
| 0 | 036 | 0.578427 | 0.864658 | 0.860048 |
| 0 | 037 | 0.916260 | 0.365726 | 0.369621 |
| 0 | 038 | 0.579712 | 0.619932 | 0.868348 |
| 0 | 039 | 0.913902 | 0.117585 | 0.385755 |
| 0 | 040 | 0.378614 | 0.982219 | 0.122365 |
| 0 | 041 | 0.107942 | 0.484969 | 0.624423 |
| 0 | 042 | 0.411433 | 0.488906 | 0.089936 |
| 0 | 043 | 0.072639 | 0.993856 | 0.582424 |
| 0 | 044 | 0.598618 | 0.993896 | 0.888670 |
| 0 | 045 | 0.884468 | 0.493828 | 0.383853 |
| 0 | 046 | 0.581667 | 0.488870 | 0.907185 |
| 0 | 047 | 0.909778 | 0.986303 | 0.414164 |
| 0 | 048 | 0.303450 | 0.060550 | 0.448188 |
| 0 | 049 | 0.179354 | 0.560870 | 0.955587 |
| 0 | 050 | 0.313777 | 0.443793 | 0.438459 |
| 0 | 051 | 0.174911 | 0.938406 | 0.927317 |
| 0 | 052 | 0.682553 | 0.921096 | 0.553821 |
| 0 | 053 | 0.814846 | 0.422561 | 0.043580 |
| 0 | 054 | 0.681031 | 0.530442 | 0.565023 |
| 0 | 055 | 0.806344 | 0.043124 | 0.074399 |
| 0 | 056 | 0.322587 | 0.943958 | 0.360161 |
| 0 | 057 | 0.166288 | 0.445510 | 0.860821 |
| 0 | 058 | 0.299065 | 0.549097 | 0.321801 |
| 0 | 059 | 0.193950 | 0.047104 | 0.819129 |
| 0 | 060 | 0.676769 | 0.042539 | 0.630872 |
| 0 | 061 | 0.825287 | 0.540418 | 0.129944 |
| 0 | 062 | 0.694416 | 0.433436 | 0.696299 |
| 0 | 063 | 0.793441 | 0.936063 | 0.188746 |
| 0 | 064 | 0.240957 | 0.031805 | 0.280941 |
| 0 | 065 | 0.243818 | 0.540243 | 0.788773 |
| 0 | 066 | 0.252432 | 0.432756 | 0.265285 |
| 0 | 067 | 0.234389 | 0.930619 | 0.752178 |
| 0 | 068 | 0.738463 | 0.945333 | 0.725799 |
| 0 | 069 | 0.750349 | 0.445630 | 0.208831 |
| 0 | 070 | 0.740891 | 0.553143 | 0.737058 |
| 0 | 071 | 0.742642 | 0.051281 | 0.244495 |
| 0 | 072 | 0.275979 | 0.129955 | 0.608948 |
| 0 | 073 | 0.216311 | 0.626852 | 0.115894 |
| 0 | 074 | 0.308459 | 0.374442 | 0.600585 |
| 0 | 075 | 0.182200 | 0.869534 | 0.090185 |
| 0 | 076 | 0.691810 | 0.864703 | 0.380982 |
| 0 | 077 | 0.782880 | 0.358011 | 0.881179 |
| 0 | 078 | 0.687258 | 0.620358 | 0.425886 |
| 0 | 079 | 0.794895 | 0.116518 | 0.916069 |

|   |      |          |          |          |
|---|------|----------|----------|----------|
| 0 | 080  | 0.192650 | 0.036552 | 0.545985 |
| 0 | 081  | 0.294310 | 0.533869 | 0.040009 |
| 0 | 082  | 0.196831 | 0.420470 | 0.516508 |
| 0 | 083  | 0.291846 | 0.920185 | 0.007677 |
| 0 | 084  | 0.789581 | 0.942215 | 0.444657 |
| 0 | 085  | 0.699378 | 0.445694 | 0.956917 |
| 0 | 086  | 0.798272 | 0.561618 | 0.492540 |
| 0 | 087  | 0.688481 | 0.058485 | 0.994202 |
| 0 | 088  | 0.306312 | 0.001743 | 0.624616 |
| 0 | 089  | 0.183683 | 0.498666 | 0.128317 |
| 0 | 090  | 0.277661 | 0.502971 | 0.606215 |
| 0 | 091  | 0.206650 | 0.999399 | 0.095940 |
| 0 | 092  | 0.675759 | 0.995352 | 0.391871 |
| 0 | 093  | 0.809855 | 0.487352 | 0.873141 |
| 0 | 094  | 0.714137 | 0.494879 | 0.382469 |
| 0 | 095  | 0.777812 | 0.985836 | 0.903029 |
| 0 | 096  | 0.100629 | 0.124145 | 0.594209 |
| 0 | 097  | 0.384010 | 0.619114 | 0.104615 |
| 0 | 098  | 0.094563 | 0.355307 | 0.587423 |
| 0 | 099  | 0.392924 | 0.853652 | 0.081713 |
| 0 | 0100 | 0.884871 | 0.855974 | 0.403988 |
| 0 | 0101 | 0.609049 | 0.359034 | 0.894972 |
| 0 | 0102 | 0.896664 | 0.624945 | 0.402535 |
| 0 | 0103 | 0.590196 | 0.125062 | 0.910398 |
| 0 | 0104 | 0.094802 | 0.063711 | 0.419795 |
| 0 | 0105 | 0.398522 | 0.562222 | 0.928359 |
| 0 | 0106 | 0.076671 | 0.441940 | 0.444401 |
| 0 | 0107 | 0.412916 | 0.942780 | 0.941933 |
| 0 | 0108 | 0.884226 | 0.918533 | 0.577235 |
| 0 | 0109 | 0.595515 | 0.416712 | 0.069797 |
| 0 | 0110 | 0.920000 | 0.547179 | 0.556236 |
| 0 | 0111 | 0.567460 | 0.046867 | 0.062834 |
| 0 | 0112 | 0.116814 | 0.037250 | 0.227922 |
| 0 | 0113 | 0.368776 | 0.536805 | 0.738392 |
| 0 | 0114 | 0.121249 | 0.425699 | 0.260652 |
| 0 | 0115 | 0.365753 | 0.927666 | 0.759359 |
| 0 | 0116 | 0.865386 | 0.951948 | 0.766510 |
| 0 | 0117 | 0.624345 | 0.452386 | 0.255778 |
| 0 | 0118 | 0.871929 | 0.559754 | 0.739603 |
| 0 | 0119 | 0.611790 | 0.057863 | 0.248274 |
| 0 | 0120 | 0.079117 | 0.941993 | 0.351247 |
| 0 | 0121 | 0.413813 | 0.441369 | 0.855227 |
| 0 | 0122 | 0.091284 | 0.545909 | 0.326131 |
| 0 | 0123 | 0.402798 | 0.046698 | 0.821840 |



|   |      |          |          |          |
|---|------|----------|----------|----------|
| 0 | 0124 | 0.911896 | 0.040306 | 0.638229 |
| 0 | 0125 | 0.567152 | 0.537777 | 0.130648 |
| 0 | 0126 | 0.904431 | 0.440594 | 0.671013 |
| 0 | 0127 | 0.582859 | 0.939179 | 0.175065 |
| 0 | 0128 | 0.200190 | 0.123718 | 0.151985 |
| 0 | 0129 | 0.292454 | 0.627443 | 0.658704 |
| 0 | 0130 | 0.192172 | 0.365764 | 0.124742 |
| 0 | 0131 | 0.303297 | 0.868956 | 0.614345 |
| 0 | 0132 | 0.791739 | 0.860630 | 0.852373 |
| 0 | 0133 | 0.701196 | 0.366452 | 0.347015 |
| 0 | 0134 | 0.801685 | 0.620175 | 0.877216 |
| 0 | 0135 | 0.681408 | 0.126954 | 0.375923 |
| 0 | 0136 | 0.493681 | 0.844371 | 0.208373 |
| 0 | 0137 | 0.994294 | 0.347844 | 0.714110 |
| 0 | 0138 | 0.494171 | 0.633336 | 0.210417 |
| 0 | 0139 | 0.994474 | 0.131960 | 0.708209 |
| 0 | 0140 | 0.492135 | 0.139887 | 0.780207 |
| 0 | 0141 | 0.001508 | 0.638596 | 0.285637 |
| 0 | 0142 | 0.497455 | 0.349044 | 0.791146 |
| 0 | 0143 | 0.992886 | 0.851374 | 0.290931 |
| 0 | 0144 | 0.374124 | 0.835907 | 0.275586 |
| 0 | 0145 | 0.114424 | 0.336147 | 0.780261 |
| 0 | 0146 | 0.380753 | 0.651057 | 0.297485 |
| 0 | 0147 | 0.110817 | 0.147172 | 0.789330 |
| 0 | 0148 | 0.612966 | 0.142463 | 0.717633 |
| 0 | 0149 | 0.887624 | 0.645169 | 0.205033 |
| 0 | 0150 | 0.611213 | 0.331709 | 0.701408 |
| 0 | 0151 | 0.877805 | 0.835901 | 0.208288 |
| 0 | 0152 | 0.420528 | 0.738313 | 0.161953 |
| 0 | 0153 | 0.064796 | 0.240132 | 0.666954 |
| 0 | 0154 | 0.569408 | 0.241843 | 0.831557 |
| 0 | 0155 | 0.924103 | 0.741859 | 0.329824 |
| 0 | 0156 | 0.299659 | 0.822851 | 0.430151 |
| 0 | 0157 | 0.186725 | 0.326030 | 0.937462 |
| 0 | 0158 | 0.313460 | 0.641494 | 0.464476 |
| 0 | 0159 | 0.176936 | 0.141293 | 0.958300 |
| 0 | 0160 | 0.689136 | 0.165499 | 0.565169 |
| 0 | 0161 | 0.800993 | 0.661285 | 0.064610 |
| 0 | 0162 | 0.682974 | 0.350628 | 0.540219 |
| 0 | 0163 | 0.805623 | 0.843183 | 0.046390 |
| 0 | 0164 | 0.246235 | 0.862137 | 0.259159 |
| 0 | 0165 | 0.242688 | 0.360420 | 0.766466 |
| 0 | 0166 | 0.250792 | 0.669009 | 0.297855 |
| 0 | 0167 | 0.240753 | 0.167243 | 0.792577 |

|    |       |          |          |          |
|----|-------|----------|----------|----------|
| O  | O168  | 0.742095 | 0.130063 | 0.738187 |
| O  | O169  | 0.762921 | 0.626904 | 0.247426 |
| O  | O170  | 0.741212 | 0.311945 | 0.705431 |
| O  | O171  | 0.749129 | 0.814386 | 0.218006 |
| O  | O172  | 0.275066 | 0.743350 | 0.579535 |
| O  | O173  | 0.216531 | 0.240980 | 0.077679 |
| O  | O174  | 0.717668 | 0.248721 | 0.421928 |
| O  | O175  | 0.769695 | 0.743595 | 0.922897 |
| O  | O176  | 0.188870 | 0.838162 | 0.529532 |
| O  | O177  | 0.301916 | 0.335297 | 0.025380 |
| O  | O178  | 0.192019 | 0.644184 | 0.535046 |
| O  | O179  | 0.298725 | 0.142795 | 0.025566 |
| O  | O180  | 0.797752 | 0.146468 | 0.460674 |
| O  | O181  | 0.687984 | 0.645217 | 0.969807 |
| O  | O182  | 0.803526 | 0.344402 | 0.466579 |
| O  | O183  | 0.686760 | 0.842279 | 0.968196 |
| O  | O184  | 0.106488 | 0.740143 | 0.581293 |
| O  | O185  | 0.383712 | 0.237190 | 0.080074 |
| O  | O186  | 0.884086 | 0.243605 | 0.421413 |
| O  | O187  | 0.605198 | 0.743657 | 0.918321 |
| O  | O188  | 0.074048 | 0.824743 | 0.438942 |
| O  | O189  | 0.420541 | 0.325673 | 0.945782 |
| O  | O190  | 0.082157 | 0.656406 | 0.434321 |
| O  | O191  | 0.410883 | 0.157048 | 0.929677 |
| O  | O192  | 0.904561 | 0.163056 | 0.572044 |
| O  | O193  | 0.570776 | 0.658651 | 0.056931 |
| O  | O194  | 0.917392 | 0.332286 | 0.559026 |
| O  | O195  | 0.569350 | 0.836661 | 0.050624 |
| O  | O196  | 0.118858 | 0.833691 | 0.254311 |
| O  | O197  | 0.370285 | 0.332706 | 0.763654 |
| O  | O198  | 0.125305 | 0.661553 | 0.248045 |
| O  | O199  | 0.367024 | 0.161450 | 0.743254 |
| O  | O200  | 0.870951 | 0.136319 | 0.759251 |
| O  | O201  | 0.622386 | 0.635011 | 0.235671 |
| O  | O202  | 0.868976 | 0.323175 | 0.741650 |
| O  | O203  | 0.619594 | 0.819193 | 0.231067 |
| O  | O204  | 0.203064 | 0.752115 | 0.166850 |
| O  | O205  | 0.288639 | 0.253913 | 0.667323 |
| O  | O206  | 0.797391 | 0.232929 | 0.834004 |
| O  | O207  | 0.686701 | 0.737004 | 0.345723 |
| O  | O208  | 0.671572 | 0.736529 | 0.611655 |
| Al | Al209 | 0.691660 | 0.653140 | 0.302368 |
| Si | Si210 | 0.412367 | 0.044240 | 0.181634 |
| Si | Si211 | 0.073679 | 0.546362 | 0.684613 |

|    |       |          |          |          |
|----|-------|----------|----------|----------|
| Si | Si212 | 0.424913 | 0.433949 | 0.176574 |
| Si | Si213 | 0.061621 | 0.938078 | 0.668786 |
| Si | Si214 | 0.568911 | 0.938423 | 0.813019 |
| Si | Si215 | 0.919889 | 0.437767 | 0.314760 |
| Si | Si216 | 0.566915 | 0.545882 | 0.824633 |
| Si | Si217 | 0.922189 | 0.045209 | 0.333333 |
| Si | Si218 | 0.309073 | 0.023057 | 0.342036 |
| Si | Si219 | 0.175736 | 0.525482 | 0.847529 |
| Si | Si220 | 0.311712 | 0.469104 | 0.324709 |
| Si | Si221 | 0.177337 | 0.967874 | 0.815731 |
| Si | Si222 | 0.676434 | 0.963435 | 0.656094 |
| Si | Si223 | 0.817964 | 0.461139 | 0.149409 |
| Si | Si224 | 0.682451 | 0.513090 | 0.681728 |
| Si | Si225 | 0.803773 | 0.016526 | 0.187530 |
| Si | Si226 | 0.269583 | 0.057465 | 0.556900 |
| Si | Si227 | 0.218367 | 0.555348 | 0.060289 |
| Si | Si228 | 0.273734 | 0.435148 | 0.541115 |
| Si | Si229 | 0.214211 | 0.931828 | 0.031087 |
| Si | Si230 | 0.710566 | 0.931108 | 0.441920 |
| Si | Si231 | 0.776615 | 0.428461 | 0.938493 |
| Si | Si232 | 0.720750 | 0.552007 | 0.466301 |
| Si | Si233 | 0.766599 | 0.051093 | 0.971371 |
| Si | Si234 | 0.115152 | 0.054933 | 0.535605 |
| Si | Si235 | 0.372292 | 0.551406 | 0.041271 |
| Si | Si236 | 0.119229 | 0.426141 | 0.542969 |
| Si | Si237 | 0.368738 | 0.924957 | 0.038237 |
| Si | Si238 | 0.866985 | 0.925359 | 0.459881 |
| Si | Si239 | 0.621718 | 0.427311 | 0.957113 |
| Si | Si240 | 0.874577 | 0.556996 | 0.458120 |
| Si | Si241 | 0.611508 | 0.055982 | 0.963711 |
| Si | Si242 | 0.071534 | 0.020476 | 0.323380 |
| Si | Si243 | 0.418072 | 0.520160 | 0.829112 |
| Si | Si244 | 0.071016 | 0.467563 | 0.330400 |
| Si | Si245 | 0.418341 | 0.967483 | 0.827518 |
| Si | Si246 | 0.911877 | 0.962165 | 0.670496 |
| Si | Si247 | 0.572588 | 0.460764 | 0.165682 |
| Si | Si248 | 0.923216 | 0.519517 | 0.669627 |
| Si | Si249 | 0.562601 | 0.017662 | 0.175100 |
| Si | Si250 | 0.191441 | 0.047515 | 0.189733 |
| Si | Si251 | 0.295269 | 0.551108 | 0.698887 |
| Si | Si252 | 0.187717 | 0.431113 | 0.194670 |
| Si | Si253 | 0.301885 | 0.932830 | 0.687807 |
| Si | Si254 | 0.793440 | 0.936410 | 0.811422 |
| Si | Si255 | 0.697622 | 0.440282 | 0.298011 |

|    |       |          |          |          |
|----|-------|----------|----------|----------|
| Si | Si256 | 0.805965 | 0.554945 | 0.807062 |
| Si | Si257 | 0.678236 | 0.057546 | 0.314639 |
| Si | Si258 | 0.420381 | 0.817696 | 0.181661 |
| Si | Si259 | 0.066917 | 0.319563 | 0.687279 |
| Si | Si260 | 0.420397 | 0.660307 | 0.193179 |
| Si | Si261 | 0.067754 | 0.161113 | 0.689764 |
| Si | Si262 | 0.566141 | 0.162686 | 0.809961 |
| Si | Si263 | 0.926775 | 0.662747 | 0.305813 |
| Si | Si264 | 0.571545 | 0.320468 | 0.805100 |
| Si | Si265 | 0.919925 | 0.820804 | 0.308312 |
| Si | Si266 | 0.310391 | 0.866467 | 0.330435 |
| Si | Si267 | 0.177705 | 0.367332 | 0.835568 |
| Si | Si268 | 0.311550 | 0.627412 | 0.345630 |
| Si | Si269 | 0.179895 | 0.125636 | 0.840109 |
| Si | Si270 | 0.680383 | 0.120396 | 0.663681 |
| Si | Si271 | 0.817470 | 0.618161 | 0.163464 |
| Si | Si272 | 0.682001 | 0.357052 | 0.660121 |
| Si | Si273 | 0.806716 | 0.857644 | 0.164656 |
| Si | Si274 | 0.266216 | 0.818755 | 0.539012 |
| Si | Si275 | 0.224542 | 0.317571 | 0.042216 |
| Si | Si276 | 0.267933 | 0.664214 | 0.558213 |
| Si | Si277 | 0.222913 | 0.162469 | 0.052295 |
| Si | Si278 | 0.721578 | 0.171592 | 0.455536 |
| Si | Si279 | 0.765054 | 0.666637 | 0.958385 |
| Si | Si280 | 0.726375 | 0.327434 | 0.444668 |
| Si | Si281 | 0.763504 | 0.821808 | 0.948819 |
| Si | Si282 | 0.112112 | 0.816977 | 0.544170 |
| Si | Si283 | 0.378176 | 0.314854 | 0.046800 |
| Si | Si284 | 0.114460 | 0.663657 | 0.543190 |
| Si | Si285 | 0.376137 | 0.161818 | 0.037613 |
| Si | Si286 | 0.875179 | 0.167444 | 0.459889 |
| Si | Si287 | 0.611319 | 0.666515 | 0.954219 |
| Si | Si288 | 0.880069 | 0.321571 | 0.454010 |
| Si | Si289 | 0.610258 | 0.821441 | 0.949725 |
| Si | Si290 | 0.066391 | 0.863091 | 0.333362 |
| Si | Si291 | 0.425345 | 0.362262 | 0.838437 |
| Si | Si292 | 0.075174 | 0.625213 | 0.323908 |
| Si | Si293 | 0.418024 | 0.126115 | 0.818953 |
| Si | Si294 | 0.920385 | 0.118037 | 0.669479 |
| Si | Si295 | 0.565444 | 0.616591 | 0.160562 |
| Si | Si296 | 0.921066 | 0.361391 | 0.671221 |
| Si | Si297 | 0.566593 | 0.860033 | 0.165845 |
| Si | Si298 | 0.187395 | 0.829078 | 0.193834 |
| Si | Si299 | 0.302571 | 0.330195 | 0.700698 |

|    |       |          |          |          |
|----|-------|----------|----------|----------|
| Si | Si300 | 0.198527 | 0.676192 | 0.207001 |
| Si | Si301 | 0.293528 | 0.177026 | 0.703029 |
| Si | Si302 | 0.801296 | 0.154211 | 0.810554 |
| Si | Si303 | 0.797960 | 0.307897 | 0.790511 |
| Si | Si304 | 0.687064 | 0.809572 | 0.293618 |
| Zn | Zn305 | 0.640099 | 0.704404 | 0.486005 |

**C<sub>4</sub>H<sub>8</sub>-Phys.Ads-H<sub>2</sub>-Phys.Ads-ZnOH<sup>+</sup> (Fig. 5/M5)** Total energy = -1938.19078482 eV

data\_

\_audit\_creation\_method 'Materials Studio'

\_cell\_length\_a 20.357621

\_cell\_length\_b 20.050598

\_cell\_length\_c 13.476578

\_cell\_angle\_alpha 90.000000

\_cell\_angle\_beta 90.000000

\_cell\_angle\_gamma 90.000000

\_symmetry\_space\_group\_name\_H-M 'P1'

loop\_

\_atom\_site\_type\_symbol

\_atom\_site\_label

\_atom\_site\_fract\_x

\_atom\_site\_fract\_y

\_atom\_site\_fract\_z

|   |     |          |          |          |
|---|-----|----------|----------|----------|
| H | H1  | 0.816366 | 0.764003 | 0.611912 |
| H | H2  | 0.660560 | 0.805391 | 0.623659 |
| H | H3  | 0.550720 | 0.540339 | 0.437964 |
| H | H4  | 0.681555 | 0.725315 | 0.684533 |
| H | H5  | 0.592690 | 0.669220 | 0.597761 |
| H | H6  | 0.551190 | 0.525975 | 0.488464 |
| H | H7  | 0.572954 | 0.797639 | 0.479649 |
| H | H8  | 0.517538 | 0.783296 | 0.576364 |
| H | H9  | 0.538578 | 0.686706 | 0.401652 |
| H | H10 | 0.470523 | 0.740502 | 0.419263 |
| H | H11 | 0.483941 | 0.673565 | 0.501939 |
| C | C12 | 0.653204 | 0.751820 | 0.628575 |
| C | C13 | 0.600858 | 0.722279 | 0.584411 |
| C | C14 | 0.550010 | 0.757663 | 0.523206 |
| C | C15 | 0.508540 | 0.711851 | 0.457397 |
| O | O16 | 0.516381 | 0.033243 | 0.216370 |
| O | O17 | 0.026430 | 0.533735 | 0.712901 |
| O | O18 | 0.518930 | 0.442532 | 0.210298 |
| O | O19 | 0.010748 | 0.930545 | 0.703745 |
| O | O20 | 0.514173 | 0.946136 | 0.788397 |
| O | O21 | 0.011899 | 0.457450 | 0.288985 |

|   |     |          |          |          |
|---|-----|----------|----------|----------|
| 0 | 022 | 0.518647 | 0.535859 | 0.789183 |
| 0 | 023 | 0.020568 | 0.042671 | 0.292859 |
| 0 | 024 | 0.399669 | 0.057421 | 0.291585 |
| 0 | 025 | 0.148644 | 0.562802 | 0.760218 |
| 0 | 026 | 0.392560 | 0.430729 | 0.251183 |
| 0 | 027 | 0.127416 | 0.943234 | 0.784957 |
| 0 | 028 | 0.629959 | 0.938101 | 0.706346 |
| 0 | 029 | 0.890697 | 0.430957 | 0.233708 |
| 0 | 030 | 0.644210 | 0.547800 | 0.751557 |
| 0 | 031 | 0.900538 | 0.037411 | 0.224667 |
| 0 | 032 | 0.437157 | 0.121334 | 0.129382 |
| 0 | 033 | 0.095458 | 0.614609 | 0.598125 |
| 0 | 034 | 0.445743 | 0.365875 | 0.098592 |
| 0 | 035 | 0.110604 | 0.860460 | 0.633917 |
| 0 | 036 | 0.601833 | 0.858608 | 0.855944 |
| 0 | 037 | 0.941381 | 0.370606 | 0.390989 |
| 0 | 038 | 0.590205 | 0.615718 | 0.899587 |
| 0 | 039 | 0.930106 | 0.120655 | 0.372648 |
| 0 | 040 | 0.408549 | 0.992698 | 0.121733 |
| 0 | 041 | 0.124978 | 0.485361 | 0.605429 |
| 0 | 042 | 0.432489 | 0.497465 | 0.089575 |
| 0 | 043 | 0.104998 | 0.990797 | 0.602502 |
| 0 | 044 | 0.620597 | 0.987717 | 0.887800 |
| 0 | 045 | 0.910644 | 0.499425 | 0.397940 |
| 0 | 046 | 0.603301 | 0.483692 | 0.914803 |
| 0 | 047 | 0.928699 | 0.990152 | 0.405925 |
| 0 | 048 | 0.337898 | 0.039464 | 0.460118 |
| 0 | 049 | 0.200427 | 0.549568 | 0.937963 |
| 0 | 050 | 0.338170 | 0.444908 | 0.428799 |
| 0 | 051 | 0.195037 | 0.949461 | 0.951120 |
| 0 | 052 | 0.696716 | 0.934243 | 0.543775 |
| 0 | 053 | 0.833479 | 0.426459 | 0.060812 |
| 0 | 054 | 0.701419 | 0.535518 | 0.578889 |
| 0 | 055 | 0.835265 | 0.037219 | 0.054970 |
| 0 | 056 | 0.338517 | 0.943330 | 0.321381 |
| 0 | 057 | 0.194607 | 0.445438 | 0.815137 |
| 0 | 058 | 0.334863 | 0.544260 | 0.297359 |
| 0 | 059 | 0.208722 | 0.044584 | 0.812862 |
| 0 | 060 | 0.704327 | 0.042574 | 0.660314 |
| 0 | 061 | 0.845789 | 0.543358 | 0.150761 |
| 0 | 062 | 0.711194 | 0.437129 | 0.711093 |
| 0 | 063 | 0.823591 | 0.934566 | 0.180063 |
| 0 | 064 | 0.268508 | 0.053025 | 0.296126 |
| 0 | 065 | 0.277423 | 0.545193 | 0.781369 |

|   |      |          |          |          |
|---|------|----------|----------|----------|
| 0 | 066  | 0.262725 | 0.436443 | 0.271201 |
| 0 | 067  | 0.256769 | 0.924522 | 0.781286 |
| 0 | 068  | 0.760994 | 0.929947 | 0.712979 |
| 0 | 069  | 0.762155 | 0.453042 | 0.219090 |
| 0 | 070  | 0.773691 | 0.551720 | 0.738795 |
| 0 | 071  | 0.771441 | 0.051665 | 0.224307 |
| 0 | 072  | 0.310139 | 0.118718 | 0.611479 |
| 0 | 073  | 0.228742 | 0.623663 | 0.093200 |
| 0 | 074  | 0.320639 | 0.364463 | 0.580353 |
| 0 | 075  | 0.217552 | 0.870496 | 0.104425 |
| 0 | 076  | 0.714102 | 0.874088 | 0.374039 |
| 0 | 077  | 0.810621 | 0.352878 | 0.903487 |
| 0 | 078  | 0.715756 | 0.630590 | 0.445178 |
| 0 | 079  | 0.809374 | 0.113389 | 0.898860 |
| 0 | 080  | 0.218749 | 0.036892 | 0.537541 |
| 0 | 081  | 0.315820 | 0.535551 | 0.027799 |
| 0 | 082  | 0.218046 | 0.426375 | 0.499977 |
| 0 | 083  | 0.316457 | 0.934281 | 0.014043 |
| 0 | 084  | 0.812729 | 0.944122 | 0.454528 |
| 0 | 085  | 0.720305 | 0.439458 | 0.964909 |
| 0 | 086  | 0.819521 | 0.559618 | 0.504444 |
| 0 | 087  | 0.712888 | 0.049269 | 0.992458 |
| 0 | 088  | 0.320159 | 0.988338 | 0.637242 |
| 0 | 089  | 0.206882 | 0.493579 | 0.114264 |
| 0 | 090  | 0.304232 | 0.494869 | 0.603746 |
| 0 | 091  | 0.231287 | 0.000587 | 0.124373 |
| 0 | 092  | 0.708558 | 0.005764 | 0.382882 |
| 0 | 093  | 0.830842 | 0.482146 | 0.882805 |
| 0 | 094  | 0.726694 | 0.504073 | 0.392437 |
| 0 | 095  | 0.798028 | 0.982641 | 0.884471 |
| 0 | 096  | 0.129175 | 0.121462 | 0.604286 |
| 0 | 097  | 0.404019 | 0.627198 | 0.081373 |
| 0 | 098  | 0.123775 | 0.353693 | 0.582756 |
| 0 | 099  | 0.410749 | 0.861450 | 0.094068 |
| 0 | 0100 | 0.904806 | 0.860128 | 0.391726 |
| 0 | 0101 | 0.626513 | 0.353231 | 0.913763 |
| 0 | 0102 | 0.913515 | 0.631378 | 0.415909 |
| 0 | 0103 | 0.620478 | 0.119805 | 0.902528 |
| 0 | 0104 | 0.108948 | 0.059481 | 0.435591 |
| 0 | 0105 | 0.420841 | 0.558874 | 0.916132 |
| 0 | 0106 | 0.096272 | 0.431159 | 0.431519 |
| 0 | 0107 | 0.439314 | 0.942222 | 0.947201 |
| 0 | 0108 | 0.917113 | 0.916402 | 0.567276 |
| 0 | 0109 | 0.617569 | 0.418128 | 0.083776 |

|   |      |          |          |          |
|---|------|----------|----------|----------|
| 0 | 0110 | 0.941008 | 0.556091 | 0.570406 |
| 0 | 0111 | 0.590366 | 0.045652 | 0.057685 |
| 0 | 0112 | 0.143281 | 0.055627 | 0.245088 |
| 0 | 0113 | 0.399978 | 0.537753 | 0.722094 |
| 0 | 0114 | 0.134273 | 0.427372 | 0.242717 |
| 0 | 0115 | 0.387527 | 0.919956 | 0.769678 |
| 0 | 0116 | 0.887932 | 0.944347 | 0.755251 |
| 0 | 0117 | 0.638631 | 0.448180 | 0.274542 |
| 0 | 0118 | 0.902874 | 0.554258 | 0.760090 |
| 0 | 0119 | 0.641875 | 0.063039 | 0.237241 |
| 0 | 0120 | 0.106632 | 0.945646 | 0.337312 |
| 0 | 0121 | 0.435434 | 0.438513 | 0.840999 |
| 0 | 0122 | 0.108448 | 0.543263 | 0.329752 |
| 0 | 0123 | 0.425242 | 0.041574 | 0.819170 |
| 0 | 0124 | 0.942683 | 0.035341 | 0.638859 |
| 0 | 0125 | 0.596564 | 0.540581 | 0.145942 |
| 0 | 0126 | 0.936127 | 0.442027 | 0.667849 |
| 0 | 0127 | 0.608453 | 0.941928 | 0.177818 |
| 0 | 0128 | 0.226847 | 0.131139 | 0.150313 |
| 0 | 0129 | 0.320997 | 0.623600 | 0.636316 |
| 0 | 0130 | 0.215462 | 0.360772 | 0.128799 |
| 0 | 0131 | 0.315720 | 0.855081 | 0.641577 |
| 0 | 0132 | 0.816520 | 0.854970 | 0.849300 |
| 0 | 0133 | 0.725868 | 0.372934 | 0.365292 |
| 0 | 0134 | 0.827689 | 0.615097 | 0.889311 |
| 0 | 0135 | 0.717434 | 0.135778 | 0.351980 |
| 0 | 0136 | 0.518041 | 0.848502 | 0.207764 |
| 0 | 0137 | 0.026762 | 0.351194 | 0.715801 |
| 0 | 0138 | 0.507358 | 0.629596 | 0.201911 |
| 0 | 0139 | 0.018609 | 0.131451 | 0.710640 |
| 0 | 0140 | 0.517364 | 0.132248 | 0.781170 |
| 0 | 0141 | 0.014164 | 0.631018 | 0.289451 |
| 0 | 0142 | 0.525745 | 0.349748 | 0.786930 |
| 0 | 0143 | 0.016566 | 0.855762 | 0.288169 |
| 0 | 0144 | 0.401571 | 0.829434 | 0.284404 |
| 0 | 0145 | 0.148914 | 0.325987 | 0.771563 |
| 0 | 0146 | 0.389770 | 0.661109 | 0.271793 |
| 0 | 0147 | 0.133065 | 0.152641 | 0.795328 |
| 0 | 0148 | 0.635563 | 0.150022 | 0.711755 |
| 0 | 0149 | 0.895725 | 0.654556 | 0.222958 |
| 0 | 0150 | 0.645488 | 0.324308 | 0.722290 |
| 0 | 0151 | 0.903605 | 0.829557 | 0.201525 |
| 0 | 0152 | 0.448642 | 0.742959 | 0.149535 |
| 0 | 0153 | 0.086614 | 0.238926 | 0.660395 |



|   |      |          |          |          |
|---|------|----------|----------|----------|
| 0 | 0154 | 0.586481 | 0.238145 | 0.840568 |
| 0 | 0155 | 0.954000 | 0.744553 | 0.335752 |
| 0 | 0156 | 0.335208 | 0.843445 | 0.448964 |
| 0 | 0157 | 0.213056 | 0.343146 | 0.936229 |
| 0 | 0158 | 0.331267 | 0.635510 | 0.441883 |
| 0 | 0159 | 0.205042 | 0.135583 | 0.956299 |
| 0 | 0160 | 0.702467 | 0.150345 | 0.546807 |
| 0 | 0161 | 0.817344 | 0.661125 | 0.072455 |
| 0 | 0162 | 0.708913 | 0.352752 | 0.556966 |
| 0 | 0163 | 0.828891 | 0.838123 | 0.043513 |
| 0 | 0164 | 0.271116 | 0.834902 | 0.277550 |
| 0 | 0165 | 0.278186 | 0.350008 | 0.766492 |
| 0 | 0166 | 0.258843 | 0.651271 | 0.281833 |
| 0 | 0167 | 0.263378 | 0.162282 | 0.785364 |
| 0 | 0168 | 0.765835 | 0.150813 | 0.719483 |
| 0 | 0169 | 0.768097 | 0.628460 | 0.247873 |
| 0 | 0170 | 0.776874 | 0.323368 | 0.717212 |
| 0 | 0171 | 0.774061 | 0.816057 | 0.219324 |
| 0 | 0172 | 0.299371 | 0.739316 | 0.555682 |
| 0 | 0173 | 0.243445 | 0.243124 | 0.055760 |
| 0 | 0174 | 0.738366 | 0.252073 | 0.434267 |
| 0 | 0175 | 0.791099 | 0.738860 | 0.921371 |
| 0 | 0176 | 0.214170 | 0.837388 | 0.518841 |
| 0 | 0177 | 0.327286 | 0.342803 | 0.029136 |
| 0 | 0178 | 0.213849 | 0.640357 | 0.526694 |
| 0 | 0179 | 0.326679 | 0.142114 | 0.024922 |
| 0 | 0180 | 0.821288 | 0.151443 | 0.470052 |
| 0 | 0181 | 0.709510 | 0.639847 | 0.964997 |
| 0 | 0182 | 0.828040 | 0.343852 | 0.479910 |
| 0 | 0183 | 0.710410 | 0.839660 | 0.964262 |
| 0 | 0184 | 0.131304 | 0.739863 | 0.568844 |
| 0 | 0185 | 0.408718 | 0.241274 | 0.068594 |
| 0 | 0186 | 0.909606 | 0.245382 | 0.426533 |
| 0 | 0187 | 0.626608 | 0.740496 | 0.927969 |
| 0 | 0188 | 0.095147 | 0.834516 | 0.441080 |
| 0 | 0189 | 0.431487 | 0.317516 | 0.915165 |
| 0 | 0190 | 0.108746 | 0.662407 | 0.415371 |
| 0 | 0191 | 0.441907 | 0.147009 | 0.937118 |
| 0 | 0192 | 0.934773 | 0.155960 | 0.564768 |
| 0 | 0193 | 0.605959 | 0.664035 | 0.082728 |
| 0 | 0194 | 0.939402 | 0.325157 | 0.576316 |
| 0 | 0195 | 0.593515 | 0.841581 | 0.049403 |
| 0 | 0196 | 0.142188 | 0.831300 | 0.256031 |
| 0 | 0197 | 0.404016 | 0.335545 | 0.724585 |

|    |       |          |          |          |
|----|-------|----------|----------|----------|
| O  | O198  | 0.134698 | 0.651521 | 0.223724 |
| O  | O199  | 0.391810 | 0.160289 | 0.754749 |
| O  | O200  | 0.892499 | 0.131343 | 0.749819 |
| O  | O201  | 0.627322 | 0.637707 | 0.273913 |
| O  | O202  | 0.902859 | 0.333140 | 0.765926 |
| O  | O203  | 0.644304 | 0.820137 | 0.228089 |
| O  | O204  | 0.216412 | 0.745472 | 0.158954 |
| O  | O205  | 0.317692 | 0.245686 | 0.658576 |
| O  | O206  | 0.831846 | 0.233415 | 0.834823 |
| O  | O207  | 0.709382 | 0.743857 | 0.353073 |
| O  | O208  | 0.803762 | 0.771019 | 0.543539 |
| Al | Al209 | 0.703978 | 0.657586 | 0.318655 |
| Si | Si210 | 0.440949 | 0.051247 | 0.189010 |
| Si | Si211 | 0.098855 | 0.549007 | 0.668475 |
| Si | Si212 | 0.446451 | 0.434512 | 0.162565 |
| Si | Si213 | 0.088778 | 0.931455 | 0.680985 |
| Si | Si214 | 0.591169 | 0.933010 | 0.810998 |
| Si | Si215 | 0.938717 | 0.439733 | 0.328432 |
| Si | Si216 | 0.590110 | 0.545478 | 0.839858 |
| Si | Si217 | 0.944078 | 0.047714 | 0.324450 |
| Si | Si218 | 0.335900 | 0.023008 | 0.342656 |
| Si | Si219 | 0.205339 | 0.525388 | 0.823811 |
| Si | Si220 | 0.332304 | 0.463979 | 0.312237 |
| Si | Si221 | 0.197081 | 0.965377 | 0.833203 |
| Si | Si222 | 0.698361 | 0.962177 | 0.656245 |
| Si | Si223 | 0.833148 | 0.464396 | 0.166973 |
| Si | Si224 | 0.707759 | 0.517295 | 0.695403 |
| Si | Si225 | 0.832870 | 0.014993 | 0.170898 |
| Si | Si226 | 0.296283 | 0.046385 | 0.562095 |
| Si | Si227 | 0.238153 | 0.550740 | 0.043700 |
| Si | Si228 | 0.295302 | 0.432580 | 0.528525 |
| Si | Si229 | 0.239995 | 0.938477 | 0.049178 |
| Si | Si230 | 0.734235 | 0.938965 | 0.438019 |
| Si | Si231 | 0.798517 | 0.425350 | 0.953205 |
| Si | Si232 | 0.741478 | 0.556917 | 0.479924 |
| Si | Si233 | 0.789364 | 0.045979 | 0.957368 |
| Si | Si234 | 0.140646 | 0.052039 | 0.545187 |
| Si | Si235 | 0.393252 | 0.554889 | 0.029009 |
| Si | Si236 | 0.140970 | 0.424435 | 0.530235 |
| Si | Si237 | 0.393557 | 0.932843 | 0.044518 |
| Si | Si238 | 0.890484 | 0.926920 | 0.454948 |
| Si | Si239 | 0.642287 | 0.423386 | 0.969611 |
| Si | Si240 | 0.896274 | 0.561832 | 0.471376 |
| Si | Si241 | 0.636201 | 0.050681 | 0.959660 |

|    |       |          |          |          |
|----|-------|----------|----------|----------|
| Si | Si242 | 0.094452 | 0.025475 | 0.328287 |
| Si | Si243 | 0.443514 | 0.517677 | 0.818049 |
| Si | Si244 | 0.087858 | 0.464930 | 0.322743 |
| Si | Si245 | 0.441510 | 0.962658 | 0.830696 |
| Si | Si246 | 0.939653 | 0.956572 | 0.666156 |
| Si | Si247 | 0.593192 | 0.462650 | 0.178265 |
| Si | Si248 | 0.951200 | 0.521397 | 0.678206 |
| Si | Si249 | 0.589491 | 0.020782 | 0.172635 |
| Si | Si250 | 0.217589 | 0.059470 | 0.203928 |
| Si | Si251 | 0.325338 | 0.549982 | 0.685439 |
| Si | Si252 | 0.205224 | 0.429920 | 0.188597 |
| Si | Si253 | 0.319605 | 0.922603 | 0.707121 |
| Si | Si254 | 0.816110 | 0.928590 | 0.799812 |
| Si | Si255 | 0.713681 | 0.444635 | 0.313299 |
| Si | Si256 | 0.833609 | 0.550383 | 0.818637 |
| Si | Si257 | 0.710155 | 0.063562 | 0.298871 |
| Si | Si258 | 0.444884 | 0.820227 | 0.183925 |
| Si | Si259 | 0.096166 | 0.317622 | 0.682484 |
| Si | Si260 | 0.438023 | 0.664741 | 0.175697 |
| Si | Si261 | 0.091636 | 0.161374 | 0.692707 |
| Si | Si262 | 0.589932 | 0.160335 | 0.808983 |
| Si | Si263 | 0.944022 | 0.665526 | 0.316189 |
| Si | Si264 | 0.595997 | 0.316594 | 0.816264 |
| Si | Si265 | 0.944797 | 0.821875 | 0.304619 |
| Si | Si266 | 0.336333 | 0.863005 | 0.332471 |
| Si | Si267 | 0.209107 | 0.366224 | 0.821900 |
| Si | Si268 | 0.328538 | 0.622902 | 0.323180 |
| Si | Si269 | 0.202216 | 0.123687 | 0.837422 |
| Si | Si270 | 0.702192 | 0.123310 | 0.659796 |
| Si | Si271 | 0.829935 | 0.621472 | 0.175873 |
| Si | Si272 | 0.710567 | 0.359367 | 0.676741 |
| Si | Si273 | 0.832753 | 0.854879 | 0.160979 |
| Si | Si274 | 0.290622 | 0.818676 | 0.541526 |
| Si | Si275 | 0.250062 | 0.322245 | 0.037498 |
| Si | Si276 | 0.290935 | 0.660129 | 0.539334 |
| Si | Si277 | 0.250556 | 0.163391 | 0.046366 |
| Si | Si278 | 0.745064 | 0.172531 | 0.450592 |
| Si | Si279 | 0.786431 | 0.663123 | 0.962747 |
| Si | Si280 | 0.750405 | 0.329918 | 0.459414 |
| Si | Si281 | 0.786807 | 0.817654 | 0.945987 |
| Si | Si282 | 0.137482 | 0.818190 | 0.540197 |
| Si | Si283 | 0.403240 | 0.317146 | 0.027895 |
| Si | Si284 | 0.137314 | 0.664183 | 0.527419 |
| Si | Si285 | 0.403543 | 0.162938 | 0.039873 |

|    |       |          |          |          |
|----|-------|----------|----------|----------|
| Si | Si286 | 0.899286 | 0.167860 | 0.458250 |
| Si | Si287 | 0.633210 | 0.664751 | 0.969925 |
| Si | Si288 | 0.904579 | 0.321301 | 0.468132 |
| Si | Si289 | 0.633278 | 0.819679 | 0.950259 |
| Si | Si290 | 0.090270 | 0.866659 | 0.330476 |
| Si | Si291 | 0.449205 | 0.360476 | 0.816519 |
| Si | Si292 | 0.091210 | 0.621837 | 0.314540 |
| Si | Si293 | 0.443712 | 0.120300 | 0.823417 |
| Si | Si294 | 0.946689 | 0.113853 | 0.666072 |
| Si | Si295 | 0.585198 | 0.618255 | 0.178385 |
| Si | Si296 | 0.951171 | 0.363026 | 0.681411 |
| Si | Si297 | 0.591278 | 0.863132 | 0.165541 |
| Si | Si298 | 0.211790 | 0.821392 | 0.199490 |
| Si | Si299 | 0.329960 | 0.323801 | 0.683106 |
| Si | Si300 | 0.209528 | 0.667710 | 0.189538 |
| Si | Si301 | 0.320798 | 0.170514 | 0.702293 |
| Si | Si302 | 0.824786 | 0.156669 | 0.800181 |
| Si | Si303 | 0.830658 | 0.311373 | 0.805076 |
| Si | Si304 | 0.711144 | 0.814512 | 0.293575 |
| Zn | Zn305 | 0.729505 | 0.725073 | 0.505997 |

### TS-C<sub>4</sub>H<sub>10</sub>-Dehydro-on-FrameworkO-ZnOH<sup>+</sup> (Fig. 5/TS3)

Total energy = -1937.43408024 eV

data\_

\_audit\_creation\_method 'Materials Studio'

\_cell\_length\_a 20.357621

\_cell\_length\_b 20.050598

\_cell\_length\_c 13.476578

\_cell\_angle\_alpha 90.000000

\_cell\_angle\_beta 90.000000

\_cell\_angle\_gamma 90.000000

\_symmetry\_space\_group\_name\_H-M 'P1'

loop\_

\_atom\_site\_type\_symbol

\_atom\_site\_label

\_atom\_site\_fract\_x

\_atom\_site\_fract\_y

\_atom\_site\_fract\_z

|   |    |          |          |          |
|---|----|----------|----------|----------|
| H | H1 | 0.802204 | 0.801238 | 0.619378 |
| H | H2 | 0.448745 | 0.609393 | 0.513902 |
| H | H3 | 0.479463 | 0.530009 | 0.480097 |
| H | H4 | 0.488611 | 0.598562 | 0.398379 |
| H | H5 | 0.593753 | 0.573617 | 0.485827 |

|   |     |          |          |          |
|---|-----|----------|----------|----------|
| H | H6  | 0.555014 | 0.582429 | 0.601450 |
| H | H7  | 0.528152 | 0.700951 | 0.562646 |
| H | H8  | 0.569422 | 0.694734 | 0.448800 |
| H | H9  | 0.644010 | 0.662484 | 0.642310 |
| H | H10 | 0.624302 | 0.744087 | 0.616860 |
| H | H11 | 0.680377 | 0.657846 | 0.509130 |
| C | C12 | 0.489095 | 0.583750 | 0.476474 |
| C | C13 | 0.554921 | 0.600652 | 0.524855 |
| C | C14 | 0.569249 | 0.675930 | 0.525223 |
| C | C15 | 0.633915 | 0.695830 | 0.579742 |
| O | O16 | 0.514374 | 0.031678 | 0.215325 |
| O | O17 | 0.029139 | 0.532360 | 0.710382 |
| O | O18 | 0.517394 | 0.446540 | 0.209689 |
| O | O19 | 0.011236 | 0.931873 | 0.699646 |
| O | O20 | 0.515592 | 0.948524 | 0.785941 |
| O | O21 | 0.010747 | 0.458140 | 0.288661 |
| O | O22 | 0.521482 | 0.535073 | 0.787995 |
| O | O23 | 0.020943 | 0.044227 | 0.293350 |
| O | O24 | 0.397168 | 0.061237 | 0.286210 |
| O | O25 | 0.152541 | 0.560848 | 0.751103 |
| O | O26 | 0.389316 | 0.434940 | 0.238284 |
| O | O27 | 0.128764 | 0.950375 | 0.775647 |
| O | O28 | 0.633844 | 0.933103 | 0.711751 |
| O | O29 | 0.888073 | 0.429218 | 0.243623 |
| O | O30 | 0.648790 | 0.546810 | 0.759140 |
| O | O31 | 0.898547 | 0.039377 | 0.233605 |
| O | O32 | 0.439479 | 0.121450 | 0.123955 |
| O | O33 | 0.095458 | 0.613457 | 0.592265 |
| O | O34 | 0.448637 | 0.368214 | 0.093646 |
| O | O35 | 0.110897 | 0.861833 | 0.631561 |
| O | O36 | 0.597722 | 0.860055 | 0.864095 |
| O | O37 | 0.944259 | 0.371105 | 0.398297 |
| O | O38 | 0.589168 | 0.617221 | 0.899728 |
| O | O39 | 0.933735 | 0.121683 | 0.380297 |
| O | O40 | 0.405560 | 0.993634 | 0.119585 |
| O | O41 | 0.125392 | 0.484204 | 0.597426 |
| O | O42 | 0.435739 | 0.499786 | 0.079626 |
| O | O43 | 0.102127 | 0.991588 | 0.591190 |
| O | O44 | 0.621129 | 0.989283 | 0.887960 |
| O | O45 | 0.913218 | 0.499584 | 0.404987 |
| O | O46 | 0.603044 | 0.485954 | 0.921652 |
| O | O47 | 0.932736 | 0.990813 | 0.411971 |
| O | O48 | 0.336258 | 0.048606 | 0.455996 |
| O | O49 | 0.205998 | 0.560478 | 0.927794 |

|   |     |          |          |          |
|---|-----|----------|----------|----------|
| 0 | 050 | 0.336180 | 0.442143 | 0.415795 |
| 0 | 051 | 0.195893 | 0.948823 | 0.942641 |
| 0 | 052 | 0.701138 | 0.941993 | 0.550174 |
| 0 | 053 | 0.832874 | 0.425264 | 0.068544 |
| 0 | 054 | 0.707253 | 0.531803 | 0.587317 |
| 0 | 055 | 0.835096 | 0.039880 | 0.062208 |
| 0 | 056 | 0.344486 | 0.944970 | 0.331180 |
| 0 | 057 | 0.194918 | 0.446426 | 0.828565 |
| 0 | 058 | 0.333887 | 0.547476 | 0.296380 |
| 0 | 059 | 0.211855 | 0.048911 | 0.814397 |
| 0 | 060 | 0.703131 | 0.043000 | 0.681503 |
| 0 | 061 | 0.842244 | 0.541424 | 0.162102 |
| 0 | 062 | 0.716514 | 0.436329 | 0.722630 |
| 0 | 063 | 0.820592 | 0.937558 | 0.187274 |
| 0 | 064 | 0.266439 | 0.047387 | 0.291655 |
| 0 | 065 | 0.280651 | 0.538440 | 0.771800 |
| 0 | 066 | 0.259660 | 0.442263 | 0.258434 |
| 0 | 067 | 0.257538 | 0.929506 | 0.771533 |
| 0 | 068 | 0.765267 | 0.931056 | 0.719211 |
| 0 | 069 | 0.759375 | 0.448092 | 0.224939 |
| 0 | 070 | 0.778784 | 0.551682 | 0.746240 |
| 0 | 071 | 0.769416 | 0.055611 | 0.228652 |
| 0 | 072 | 0.307411 | 0.122370 | 0.612181 |
| 0 | 073 | 0.231348 | 0.630627 | 0.087822 |
| 0 | 074 | 0.328458 | 0.364230 | 0.570570 |
| 0 | 075 | 0.214277 | 0.874131 | 0.100222 |
| 0 | 076 | 0.711395 | 0.876260 | 0.382846 |
| 0 | 077 | 0.810089 | 0.354419 | 0.908174 |
| 0 | 078 | 0.706551 | 0.623292 | 0.449977 |
| 0 | 079 | 0.809871 | 0.113104 | 0.903241 |
| 0 | 080 | 0.219349 | 0.036212 | 0.540371 |
| 0 | 081 | 0.317702 | 0.540063 | 0.025828 |
| 0 | 082 | 0.220169 | 0.421702 | 0.500272 |
| 0 | 083 | 0.316838 | 0.931850 | 0.008867 |
| 0 | 084 | 0.813182 | 0.949803 | 0.447213 |
| 0 | 085 | 0.721046 | 0.442290 | 0.969534 |
| 0 | 086 | 0.819614 | 0.564881 | 0.499762 |
| 0 | 087 | 0.712961 | 0.049375 | 0.995664 |
| 0 | 088 | 0.325856 | 0.991975 | 0.630911 |
| 0 | 089 | 0.204572 | 0.501450 | 0.102714 |
| 0 | 090 | 0.309522 | 0.494739 | 0.591081 |
| 0 | 091 | 0.233395 | 0.004230 | 0.112240 |
| 0 | 092 | 0.704930 | 0.007449 | 0.384307 |
| 0 | 093 | 0.834111 | 0.483518 | 0.892979 |

|   |      |          |          |          |
|---|------|----------|----------|----------|
| 0 | 094  | 0.728430 | 0.497058 | 0.400847 |
| 0 | 095  | 0.800566 | 0.981703 | 0.893683 |
| 0 | 096  | 0.129600 | 0.121937 | 0.602178 |
| 0 | 097  | 0.408133 | 0.629796 | 0.075792 |
| 0 | 098  | 0.119203 | 0.353154 | 0.572932 |
| 0 | 099  | 0.413939 | 0.863014 | 0.088738 |
| 0 | 0100 | 0.905690 | 0.861397 | 0.399172 |
| 0 | 0101 | 0.626936 | 0.355820 | 0.919398 |
| 0 | 0102 | 0.918963 | 0.631709 | 0.419076 |
| 0 | 0103 | 0.620671 | 0.121075 | 0.906941 |
| 0 | 0104 | 0.114665 | 0.064070 | 0.428538 |
| 0 | 0105 | 0.420581 | 0.562158 | 0.908196 |
| 0 | 0106 | 0.101993 | 0.431370 | 0.420250 |
| 0 | 0107 | 0.439873 | 0.946471 | 0.944291 |
| 0 | 0108 | 0.910493 | 0.919709 | 0.573734 |
| 0 | 0109 | 0.619207 | 0.420359 | 0.089956 |
| 0 | 0110 | 0.937628 | 0.558064 | 0.578154 |
| 0 | 0111 | 0.590052 | 0.044787 | 0.059086 |
| 0 | 0112 | 0.142398 | 0.050908 | 0.235986 |
| 0 | 0113 | 0.403617 | 0.536207 | 0.714587 |
| 0 | 0114 | 0.131478 | 0.432923 | 0.227840 |
| 0 | 0115 | 0.388488 | 0.922720 | 0.767093 |
| 0 | 0116 | 0.891417 | 0.944656 | 0.764942 |
| 0 | 0117 | 0.635863 | 0.448953 | 0.282015 |
| 0 | 0118 | 0.907873 | 0.554637 | 0.771016 |
| 0 | 0119 | 0.639313 | 0.065689 | 0.239108 |
| 0 | 0120 | 0.105170 | 0.946725 | 0.342406 |
| 0 | 0121 | 0.436487 | 0.439852 | 0.840352 |
| 0 | 0122 | 0.107333 | 0.545779 | 0.324002 |
| 0 | 0123 | 0.427122 | 0.044491 | 0.814102 |
| 0 | 0124 | 0.940722 | 0.037432 | 0.645129 |
| 0 | 0125 | 0.599539 | 0.542970 | 0.152873 |
| 0 | 0126 | 0.935353 | 0.442838 | 0.673353 |
| 0 | 0127 | 0.609668 | 0.942765 | 0.181843 |
| 0 | 0128 | 0.226805 | 0.132158 | 0.151759 |
| 0 | 0129 | 0.322894 | 0.622089 | 0.631938 |
| 0 | 0130 | 0.212748 | 0.368977 | 0.110903 |
| 0 | 0131 | 0.318163 | 0.858815 | 0.635792 |
| 0 | 0132 | 0.818639 | 0.854416 | 0.855560 |
| 0 | 0133 | 0.719326 | 0.367348 | 0.369510 |
| 0 | 0134 | 0.830558 | 0.616304 | 0.898166 |
| 0 | 0135 | 0.714410 | 0.137945 | 0.356957 |
| 0 | 0136 | 0.517106 | 0.851365 | 0.210710 |
| 0 | 0137 | 0.027275 | 0.351783 | 0.714473 |

|   |      |          |          |          |
|---|------|----------|----------|----------|
| 0 | 0138 | 0.508207 | 0.631429 | 0.202398 |
| 0 | 0139 | 0.021068 | 0.131771 | 0.711654 |
| 0 | 0140 | 0.519894 | 0.135439 | 0.781333 |
| 0 | 0141 | 0.015511 | 0.636050 | 0.285549 |
| 0 | 0142 | 0.527879 | 0.351641 | 0.788700 |
| 0 | 0143 | 0.015228 | 0.857203 | 0.290246 |
| 0 | 0144 | 0.398379 | 0.829516 | 0.277660 |
| 0 | 0145 | 0.151764 | 0.330766 | 0.760537 |
| 0 | 0146 | 0.389413 | 0.663399 | 0.266034 |
| 0 | 0147 | 0.136490 | 0.156187 | 0.792520 |
| 0 | 0148 | 0.640067 | 0.155976 | 0.718896 |
| 0 | 0149 | 0.895077 | 0.653573 | 0.226532 |
| 0 | 0150 | 0.648501 | 0.324814 | 0.729405 |
| 0 | 0151 | 0.901150 | 0.833040 | 0.207538 |
| 0 | 0152 | 0.451375 | 0.744953 | 0.146319 |
| 0 | 0153 | 0.087047 | 0.239849 | 0.657998 |
| 0 | 0154 | 0.587068 | 0.240476 | 0.848222 |
| 0 | 0155 | 0.951740 | 0.746197 | 0.337962 |
| 0 | 0156 | 0.334289 | 0.838062 | 0.444162 |
| 0 | 0157 | 0.220233 | 0.332760 | 0.922692 |
| 0 | 0158 | 0.330939 | 0.641393 | 0.437967 |
| 0 | 0159 | 0.205339 | 0.141237 | 0.957296 |
| 0 | 0160 | 0.704822 | 0.142842 | 0.552635 |
| 0 | 0161 | 0.810632 | 0.658094 | 0.082577 |
| 0 | 0162 | 0.711199 | 0.355925 | 0.564064 |
| 0 | 0163 | 0.825849 | 0.841163 | 0.050996 |
| 0 | 0164 | 0.268661 | 0.845063 | 0.274281 |
| 0 | 0165 | 0.279795 | 0.360569 | 0.752827 |
| 0 | 0166 | 0.258669 | 0.654503 | 0.278597 |
| 0 | 0167 | 0.267434 | 0.166119 | 0.789541 |
| 0 | 0168 | 0.770592 | 0.151790 | 0.722344 |
| 0 | 0169 | 0.769337 | 0.628061 | 0.264099 |
| 0 | 0170 | 0.780089 | 0.321790 | 0.721337 |
| 0 | 0171 | 0.772030 | 0.818707 | 0.227623 |
| 0 | 0172 | 0.298517 | 0.739821 | 0.562440 |
| 0 | 0173 | 0.244517 | 0.246087 | 0.064453 |
| 0 | 0174 | 0.737750 | 0.250390 | 0.450328 |
| 0 | 0175 | 0.792281 | 0.739358 | 0.932329 |
| 0 | 0176 | 0.214453 | 0.837183 | 0.518345 |
| 0 | 0177 | 0.328987 | 0.344289 | 0.029136 |
| 0 | 0178 | 0.214499 | 0.640722 | 0.525799 |
| 0 | 0179 | 0.326892 | 0.145234 | 0.026740 |
| 0 | 0180 | 0.821754 | 0.149326 | 0.469765 |
| 0 | 0181 | 0.709050 | 0.639722 | 0.962445 |



|    |       |          |          |          |
|----|-------|----------|----------|----------|
| O  | O182  | 0.827087 | 0.346314 | 0.475760 |
| O  | O183  | 0.709840 | 0.841008 | 0.964068 |
| O  | O184  | 0.131150 | 0.739728 | 0.568402 |
| O  | O185  | 0.411124 | 0.242991 | 0.067842 |
| O  | O186  | 0.908491 | 0.246073 | 0.431489 |
| O  | O187  | 0.626621 | 0.741558 | 0.929398 |
| O  | O188  | 0.095685 | 0.833039 | 0.439468 |
| O  | O189  | 0.431371 | 0.318042 | 0.912226 |
| O  | O190  | 0.111262 | 0.664191 | 0.411412 |
| O  | O191  | 0.440331 | 0.149944 | 0.932920 |
| O  | O192  | 0.932756 | 0.158264 | 0.571920 |
| O  | O193  | 0.607068 | 0.664780 | 0.083118 |
| O  | O194  | 0.934235 | 0.325570 | 0.582966 |
| O  | O195  | 0.595510 | 0.840076 | 0.056783 |
| O  | O196  | 0.140192 | 0.834773 | 0.252893 |
| O  | O197  | 0.406621 | 0.337518 | 0.721839 |
| O  | O198  | 0.135649 | 0.654162 | 0.218510 |
| O  | O199  | 0.394834 | 0.162979 | 0.748046 |
| O  | O200  | 0.896753 | 0.134425 | 0.760012 |
| O  | O201  | 0.627936 | 0.643948 | 0.275122 |
| O  | O202  | 0.905068 | 0.334090 | 0.774830 |
| O  | O203  | 0.642456 | 0.820855 | 0.237930 |
| O  | O204  | 0.217349 | 0.750454 | 0.158988 |
| O  | O205  | 0.317574 | 0.249154 | 0.659141 |
| O  | O206  | 0.833005 | 0.234203 | 0.844079 |
| O  | O207  | 0.709766 | 0.745965 | 0.363803 |
| O  | O208  | 0.788352 | 0.799818 | 0.550774 |
| Al | Al209 | 0.703296 | 0.661219 | 0.326129 |
| Si | Si210 | 0.439837 | 0.051973 | 0.185479 |
| Si | Si211 | 0.100560 | 0.547638 | 0.662156 |
| Si | Si212 | 0.446906 | 0.437764 | 0.155522 |
| Si | Si213 | 0.088828 | 0.934088 | 0.674221 |
| Si | Si214 | 0.591525 | 0.933185 | 0.813544 |
| Si | Si215 | 0.939302 | 0.439583 | 0.334123 |
| Si | Si216 | 0.591480 | 0.545944 | 0.842906 |
| Si | Si217 | 0.945384 | 0.048945 | 0.330051 |
| Si | Si218 | 0.335799 | 0.025112 | 0.341187 |
| Si | Si219 | 0.208467 | 0.526088 | 0.819282 |
| Si | Si220 | 0.329756 | 0.466849 | 0.302024 |
| Si | Si221 | 0.198510 | 0.969319 | 0.826436 |
| Si | Si222 | 0.701246 | 0.962893 | 0.665382 |
| Si | Si223 | 0.830870 | 0.462002 | 0.175571 |
| Si | Si224 | 0.712872 | 0.516191 | 0.704814 |
| Si | Si225 | 0.831200 | 0.017828 | 0.178140 |

|    |       |          |          |          |
|----|-------|----------|----------|----------|
| Si | Si226 | 0.296852 | 0.050299 | 0.560285 |
| Si | Si227 | 0.240143 | 0.558274 | 0.036241 |
| Si | Si228 | 0.298294 | 0.430731 | 0.519839 |
| Si | Si229 | 0.240148 | 0.939449 | 0.041669 |
| Si | Si230 | 0.734057 | 0.942779 | 0.441244 |
| Si | Si231 | 0.799158 | 0.426427 | 0.959890 |
| Si | Si232 | 0.742119 | 0.552243 | 0.484365 |
| Si | Si233 | 0.789974 | 0.046362 | 0.963397 |
| Si | Si234 | 0.141458 | 0.053470 | 0.540718 |
| Si | Si235 | 0.395488 | 0.558193 | 0.022528 |
| Si | Si236 | 0.142063 | 0.423018 | 0.522781 |
| Si | Si237 | 0.393803 | 0.933961 | 0.040487 |
| Si | Si238 | 0.889899 | 0.929610 | 0.458397 |
| Si | Si239 | 0.643009 | 0.425809 | 0.975362 |
| Si | Si240 | 0.897781 | 0.563508 | 0.474702 |
| Si | Si241 | 0.636430 | 0.051116 | 0.961889 |
| Si | Si242 | 0.095374 | 0.026293 | 0.325568 |
| Si | Si243 | 0.445315 | 0.518447 | 0.813534 |
| Si | Si244 | 0.087993 | 0.467270 | 0.314659 |
| Si | Si245 | 0.442752 | 0.965585 | 0.827297 |
| Si | Si246 | 0.938680 | 0.958403 | 0.670602 |
| Si | Si247 | 0.593032 | 0.465011 | 0.183199 |
| Si | Si248 | 0.952232 | 0.521897 | 0.683639 |
| Si | Si249 | 0.588605 | 0.021090 | 0.174513 |
| Si | Si250 | 0.217371 | 0.058182 | 0.198203 |
| Si | Si251 | 0.328839 | 0.547490 | 0.677035 |
| Si | Si252 | 0.202764 | 0.436537 | 0.174520 |
| Si | Si253 | 0.322080 | 0.926338 | 0.701029 |
| Si | Si254 | 0.819066 | 0.928715 | 0.807881 |
| Si | Si255 | 0.710893 | 0.440200 | 0.319171 |
| Si | Si256 | 0.837798 | 0.551362 | 0.827976 |
| Si | Si257 | 0.707227 | 0.066151 | 0.302006 |
| Si | Si258 | 0.445299 | 0.822000 | 0.181079 |
| Si | Si259 | 0.096115 | 0.318992 | 0.676656 |
| Si | Si260 | 0.439671 | 0.666967 | 0.172379 |
| Si | Si261 | 0.093453 | 0.162567 | 0.691142 |
| Si | Si262 | 0.591768 | 0.163209 | 0.813839 |
| Si | Si263 | 0.944889 | 0.667061 | 0.317315 |
| Si | Si264 | 0.597474 | 0.318487 | 0.821793 |
| Si | Si265 | 0.943500 | 0.823988 | 0.309083 |
| Si | Si266 | 0.336151 | 0.864709 | 0.331097 |
| Si | Si267 | 0.211963 | 0.367868 | 0.815714 |
| Si | Si268 | 0.328379 | 0.626491 | 0.319929 |
| Si | Si269 | 0.204824 | 0.127985 | 0.838533 |

|    |       |          |          |          |
|----|-------|----------|----------|----------|
| Si | Si270 | 0.704797 | 0.123266 | 0.668924 |
| Si | Si271 | 0.827712 | 0.619975 | 0.185683 |
| Si | Si272 | 0.713811 | 0.359443 | 0.684093 |
| Si | Si273 | 0.829928 | 0.857953 | 0.168255 |
| Si | Si274 | 0.291009 | 0.818562 | 0.540484 |
| Si | Si275 | 0.251699 | 0.323209 | 0.031915 |
| Si | Si276 | 0.291405 | 0.661358 | 0.538403 |
| Si | Si277 | 0.250890 | 0.166478 | 0.049282 |
| Si | Si278 | 0.744915 | 0.170351 | 0.457106 |
| Si | Si279 | 0.785828 | 0.662869 | 0.969449 |
| Si | Si280 | 0.749152 | 0.329267 | 0.465296 |
| Si | Si281 | 0.786562 | 0.818598 | 0.952020 |
| Si | Si282 | 0.137777 | 0.818087 | 0.539222 |
| Si | Si283 | 0.404923 | 0.318550 | 0.025954 |
| Si | Si284 | 0.138012 | 0.664575 | 0.524645 |
| Si | Si285 | 0.404305 | 0.164887 | 0.037775 |
| Si | Si286 | 0.899425 | 0.168381 | 0.463368 |
| Si | Si287 | 0.633119 | 0.665605 | 0.969837 |
| Si | Si288 | 0.903568 | 0.322225 | 0.471978 |
| Si | Si289 | 0.632615 | 0.820361 | 0.954567 |
| Si | Si290 | 0.089291 | 0.867930 | 0.331036 |
| Si | Si291 | 0.450730 | 0.361952 | 0.815290 |
| Si | Si292 | 0.092352 | 0.624888 | 0.309935 |
| Si | Si293 | 0.445274 | 0.123197 | 0.819601 |
| Si | Si294 | 0.947551 | 0.115764 | 0.672009 |
| Si | Si295 | 0.586421 | 0.621155 | 0.180781 |
| Si | Si296 | 0.950592 | 0.363719 | 0.686342 |
| Si | Si297 | 0.591474 | 0.863934 | 0.171705 |
| Si | Si298 | 0.210240 | 0.826634 | 0.197153 |
| Si | Si299 | 0.333111 | 0.327359 | 0.677246 |
| Si | Si300 | 0.210430 | 0.672201 | 0.185873 |
| Si | Si301 | 0.321991 | 0.173881 | 0.702026 |
| Si | Si302 | 0.827273 | 0.157763 | 0.806917 |
| Si | Si303 | 0.832417 | 0.311762 | 0.812005 |
| Si | Si304 | 0.709605 | 0.816249 | 0.302940 |
| Zn | Zn305 | 0.715226 | 0.749208 | 0.531508 |

**M-C<sub>4</sub>H<sub>9</sub>ZnOH-HO-ZnOH<sup>+</sup> (Fig. 5/M4)** Total energy = -1937.86118469 eV

data\_

|                        |                    |
|------------------------|--------------------|
| _audit_creation_method | 'Materials Studio' |
| _cell_length_a         | 20.357621          |
| _cell_length_b         | 20.050598          |
| _cell_length_c         | 13.476578          |

```

_cell_angle_alpha      90.000000
_cell_angle_beta      90.000000
_cell_angle_gamma     90.000000
_symmetry_space_group_name_H-M  'P1'
loop_
_atom_site_type_symbol
_atom_site_label
_atom_site_fract_x
_atom_site_fract_y
_atom_site_fract_z
  H      H1          0.831461      0.745894      0.627019
  H      H2          0.465546      0.645783      0.554669
  H      H3          0.512617      0.572801      0.572848
  H      H4          0.520713      0.619537      0.461397
  H      H5          0.615133      0.639191      0.585932
  H      H6          0.558243      0.669348      0.670531
  H      H7          0.525267      0.759670      0.552474
  H      H8          0.584511      0.732886      0.467305
  H      H9          0.612393      0.782605      0.679743
  H      H10         0.620215      0.831341      0.572091
  H      H11         0.668551      0.628901      0.476885
  C      C12         0.513788      0.623261      0.541949
  C      C13         0.567563      0.665474      0.590463
  C      C14         0.573845      0.735759      0.547189
  C      C15         0.624091      0.780345      0.600393
  O      O16         0.520170      0.035897      0.216914
  O      O17         0.022379      0.536615      0.717898
  O      O18         0.524626      0.439622      0.216577
  O      O19         0.011873      0.933271      0.708309
  O      O20         0.513877      0.945777      0.789008
  O      O21         0.018583      0.457086      0.295049
  O      O22         0.516872      0.533620      0.793907
  O      O23         0.021914      0.039426      0.293123
  O      O24         0.403305      0.057009      0.294019
  O      O25         0.141132      0.561023      0.783861
  O      O26         0.402178      0.433592      0.278672
  O      O27         0.127998      0.940787      0.791435
  O      O28         0.628671      0.943070      0.703892
  O      O29         0.900208      0.433073      0.226686
  O      O30         0.639157      0.534931      0.740454
  O      O31         0.904546      0.044851      0.215065
  O      O32         0.437640      0.119618      0.128635
  O      O33         0.098894      0.620373      0.619632
  O      O34         0.441182      0.362800      0.122279

```

|   |     |          |          |          |
|---|-----|----------|----------|----------|
| 0 | 035 | 0.110440 | 0.863773 | 0.633522 |
| 0 | 036 | 0.605465 | 0.861980 | 0.854222 |
| 0 | 037 | 0.942212 | 0.370727 | 0.387731 |
| 0 | 038 | 0.596766 | 0.617206 | 0.881949 |
| 0 | 039 | 0.933778 | 0.121199 | 0.370933 |
| 0 | 040 | 0.413393 | 0.989985 | 0.126017 |
| 0 | 041 | 0.125983 | 0.490716 | 0.619101 |
| 0 | 042 | 0.431361 | 0.494426 | 0.107645 |
| 0 | 043 | 0.108326 | 0.995153 | 0.613195 |
| 0 | 044 | 0.618555 | 0.991701 | 0.886423 |
| 0 | 045 | 0.913222 | 0.500142 | 0.394807 |
| 0 | 046 | 0.605948 | 0.486283 | 0.917823 |
| 0 | 047 | 0.921607 | 0.990284 | 0.394293 |
| 0 | 048 | 0.339726 | 0.039477 | 0.462077 |
| 0 | 049 | 0.198853 | 0.541153 | 0.956453 |
| 0 | 050 | 0.341227 | 0.450989 | 0.449938 |
| 0 | 051 | 0.196527 | 0.951573 | 0.956077 |
| 0 | 052 | 0.695659 | 0.943227 | 0.539420 |
| 0 | 053 | 0.838117 | 0.422660 | 0.056564 |
| 0 | 054 | 0.708323 | 0.532760 | 0.578515 |
| 0 | 055 | 0.839239 | 0.035358 | 0.044833 |
| 0 | 056 | 0.337368 | 0.945246 | 0.321207 |
| 0 | 057 | 0.200574 | 0.446343 | 0.816640 |
| 0 | 058 | 0.333859 | 0.543978 | 0.307968 |
| 0 | 059 | 0.207863 | 0.044147 | 0.813617 |
| 0 | 060 | 0.710935 | 0.042737 | 0.671668 |
| 0 | 061 | 0.845759 | 0.540557 | 0.143307 |
| 0 | 062 | 0.723313 | 0.435213 | 0.708756 |
| 0 | 063 | 0.829734 | 0.939148 | 0.180401 |
| 0 | 064 | 0.272161 | 0.057840 | 0.297307 |
| 0 | 065 | 0.271372 | 0.556023 | 0.795949 |
| 0 | 066 | 0.271738 | 0.429503 | 0.287534 |
| 0 | 067 | 0.257341 | 0.924514 | 0.785989 |
| 0 | 068 | 0.758443 | 0.923405 | 0.708518 |
| 0 | 069 | 0.770288 | 0.444924 | 0.218866 |
| 0 | 070 | 0.767274 | 0.556078 | 0.750882 |
| 0 | 071 | 0.775114 | 0.057472 | 0.211514 |
| 0 | 072 | 0.311249 | 0.119637 | 0.611404 |
| 0 | 073 | 0.231010 | 0.620435 | 0.105259 |
| 0 | 074 | 0.320090 | 0.369659 | 0.600242 |
| 0 | 075 | 0.219848 | 0.871128 | 0.107194 |
| 0 | 076 | 0.714995 | 0.873081 | 0.376696 |
| 0 | 077 | 0.807304 | 0.352599 | 0.898511 |
| 0 | 078 | 0.706400 | 0.617609 | 0.436187 |

|   |      |          |          |          |
|---|------|----------|----------|----------|
| 0 | 079  | 0.809720 | 0.112755 | 0.892703 |
| 0 | 080  | 0.219116 | 0.040137 | 0.534913 |
| 0 | 081  | 0.318233 | 0.534714 | 0.034051 |
| 0 | 082  | 0.219830 | 0.432813 | 0.513725 |
| 0 | 083  | 0.318082 | 0.936682 | 0.018914 |
| 0 | 084  | 0.815041 | 0.934181 | 0.466466 |
| 0 | 085  | 0.722718 | 0.441484 | 0.967649 |
| 0 | 086  | 0.822746 | 0.565901 | 0.495612 |
| 0 | 087  | 0.715223 | 0.047902 | 0.988114 |
| 0 | 088  | 0.317459 | 0.989405 | 0.639486 |
| 0 | 089  | 0.215086 | 0.490483 | 0.134669 |
| 0 | 090  | 0.303591 | 0.499563 | 0.624407 |
| 0 | 091  | 0.231707 | 0.001165 | 0.130422 |
| 0 | 092  | 0.723721 | 0.004756 | 0.373632 |
| 0 | 093  | 0.832874 | 0.481650 | 0.881006 |
| 0 | 094  | 0.737878 | 0.491836 | 0.395894 |
| 0 | 095  | 0.798318 | 0.982176 | 0.874819 |
| 0 | 096  | 0.130399 | 0.125733 | 0.603048 |
| 0 | 097  | 0.404584 | 0.624500 | 0.099618 |
| 0 | 098  | 0.127887 | 0.358579 | 0.597306 |
| 0 | 099  | 0.410390 | 0.859289 | 0.096230 |
| 0 | 0100 | 0.908397 | 0.857681 | 0.388834 |
| 0 | 0101 | 0.629749 | 0.355517 | 0.910563 |
| 0 | 0102 | 0.920156 | 0.632539 | 0.409880 |
| 0 | 0103 | 0.624845 | 0.123718 | 0.901561 |
| 0 | 0104 | 0.105739 | 0.057379 | 0.440777 |
| 0 | 0105 | 0.428588 | 0.557219 | 0.935265 |
| 0 | 0106 | 0.097386 | 0.435828 | 0.446374 |
| 0 | 0107 | 0.440156 | 0.940513 | 0.949299 |
| 0 | 0108 | 0.928467 | 0.917679 | 0.558812 |
| 0 | 0109 | 0.619460 | 0.416903 | 0.083465 |
| 0 | 0110 | 0.942724 | 0.558275 | 0.567222 |
| 0 | 0111 | 0.593808 | 0.050782 | 0.057733 |
| 0 | 0112 | 0.145603 | 0.058299 | 0.252593 |
| 0 | 0113 | 0.395701 | 0.547738 | 0.743759 |
| 0 | 0114 | 0.142406 | 0.423085 | 0.262096 |
| 0 | 0115 | 0.387335 | 0.922834 | 0.771368 |
| 0 | 0116 | 0.885814 | 0.943285 | 0.742215 |
| 0 | 0117 | 0.645829 | 0.452141 | 0.270898 |
| 0 | 0118 | 0.897291 | 0.556584 | 0.752981 |
| 0 | 0119 | 0.646028 | 0.060545 | 0.238235 |
| 0 | 0120 | 0.110672 | 0.945339 | 0.337189 |
| 0 | 0121 | 0.430829 | 0.439999 | 0.845273 |
| 0 | 0122 | 0.115183 | 0.542851 | 0.333733 |

|   |      |          |          |          |
|---|------|----------|----------|----------|
| 0 | 0123 | 0.427809 | 0.042807 | 0.826044 |
| 0 | 0124 | 0.945626 | 0.036531 | 0.635148 |
| 0 | 0125 | 0.595900 | 0.539548 | 0.141688 |
| 0 | 0126 | 0.935009 | 0.444407 | 0.663278 |
| 0 | 0127 | 0.608957 | 0.942876 | 0.169897 |
| 0 | 0128 | 0.226331 | 0.132475 | 0.151093 |
| 0 | 0129 | 0.318056 | 0.629764 | 0.648630 |
| 0 | 0130 | 0.221456 | 0.357129 | 0.144190 |
| 0 | 0131 | 0.315507 | 0.856298 | 0.644613 |
| 0 | 0132 | 0.819412 | 0.853965 | 0.845634 |
| 0 | 0133 | 0.723585 | 0.364459 | 0.358835 |
| 0 | 0134 | 0.831231 | 0.614238 | 0.897692 |
| 0 | 0135 | 0.722132 | 0.135126 | 0.348815 |
| 0 | 0136 | 0.520202 | 0.848599 | 0.204539 |
| 0 | 0137 | 0.023918 | 0.353098 | 0.716683 |
| 0 | 0138 | 0.514150 | 0.632280 | 0.207360 |
| 0 | 0139 | 0.020338 | 0.133224 | 0.710651 |
| 0 | 0140 | 0.519428 | 0.133572 | 0.784176 |
| 0 | 0141 | 0.021192 | 0.629900 | 0.286004 |
| 0 | 0142 | 0.524734 | 0.353372 | 0.791848 |
| 0 | 0143 | 0.019904 | 0.856930 | 0.285237 |
| 0 | 0144 | 0.405278 | 0.833681 | 0.289423 |
| 0 | 0145 | 0.142726 | 0.329819 | 0.788222 |
| 0 | 0146 | 0.400527 | 0.656659 | 0.291553 |
| 0 | 0147 | 0.134962 | 0.153619 | 0.795684 |
| 0 | 0148 | 0.636875 | 0.150027 | 0.709014 |
| 0 | 0149 | 0.904368 | 0.648405 | 0.214133 |
| 0 | 0150 | 0.642398 | 0.331697 | 0.716939 |
| 0 | 0151 | 0.906660 | 0.831950 | 0.196896 |
| 0 | 0152 | 0.447429 | 0.742127 | 0.159839 |
| 0 | 0153 | 0.088315 | 0.242345 | 0.666247 |
| 0 | 0154 | 0.589035 | 0.241031 | 0.834782 |
| 0 | 0155 | 0.958443 | 0.743876 | 0.324086 |
| 0 | 0156 | 0.336231 | 0.847165 | 0.452112 |
| 0 | 0157 | 0.209761 | 0.350610 | 0.951003 |
| 0 | 0158 | 0.332819 | 0.633221 | 0.454318 |
| 0 | 0159 | 0.205515 | 0.135017 | 0.957219 |
| 0 | 0160 | 0.704518 | 0.142730 | 0.543823 |
| 0 | 0161 | 0.812797 | 0.660948 | 0.080910 |
| 0 | 0162 | 0.709821 | 0.353003 | 0.553494 |
| 0 | 0163 | 0.831405 | 0.844441 | 0.040641 |
| 0 | 0164 | 0.274694 | 0.834266 | 0.279313 |
| 0 | 0165 | 0.273717 | 0.340541 | 0.780804 |
| 0 | 0166 | 0.269739 | 0.657757 | 0.287000 |

|    |       |          |          |          |
|----|-------|----------|----------|----------|
| 0  | 0167  | 0.265685 | 0.160499 | 0.787419 |
| 0  | 0168  | 0.767268 | 0.156166 | 0.715902 |
| 0  | 0169  | 0.780523 | 0.622245 | 0.264037 |
| 0  | 0170  | 0.773389 | 0.315151 | 0.715260 |
| 0  | 0171  | 0.776462 | 0.822786 | 0.216786 |
| 0  | 0172  | 0.298704 | 0.741848 | 0.555176 |
| 0  | 0173  | 0.243978 | 0.243403 | 0.053686 |
| 0  | 0174  | 0.740672 | 0.248320 | 0.440514 |
| 0  | 0175  | 0.797421 | 0.739485 | 0.927031 |
| 0  | 0176  | 0.214623 | 0.840771 | 0.519889 |
| 0  | 0177  | 0.328148 | 0.343103 | 0.030758 |
| 0  | 0178  | 0.213679 | 0.641811 | 0.531596 |
| 0  | 0179  | 0.326892 | 0.141490 | 0.026281 |
| 0  | 0180  | 0.824700 | 0.148460 | 0.470324 |
| 0  | 0181  | 0.711243 | 0.642453 | 0.962326 |
| 0  | 0182  | 0.828126 | 0.344680 | 0.474218 |
| 0  | 0183  | 0.713303 | 0.839110 | 0.961252 |
| 0  | 0184  | 0.132806 | 0.742856 | 0.572435 |
| 0  | 0185  | 0.407290 | 0.240625 | 0.075176 |
| 0  | 0186  | 0.909644 | 0.245572 | 0.424434 |
| 0  | 0187  | 0.628108 | 0.741904 | 0.920443 |
| 0  | 0188  | 0.095745 | 0.834757 | 0.441365 |
| 0  | 0189  | 0.439869 | 0.323346 | 0.932918 |
| 0  | 0190  | 0.103530 | 0.657475 | 0.430477 |
| 0  | 0191  | 0.442089 | 0.151299 | 0.937930 |
| 0  | 0192  | 0.938860 | 0.157618 | 0.562361 |
| 0  | 0193  | 0.601911 | 0.661101 | 0.068939 |
| 0  | 0194  | 0.938930 | 0.326807 | 0.573366 |
| 0  | 0195  | 0.596141 | 0.839905 | 0.046876 |
| 0  | 0196  | 0.145722 | 0.829839 | 0.258412 |
| 0  | 0197  | 0.401040 | 0.330989 | 0.743998 |
| 0  | 0198  | 0.143744 | 0.655857 | 0.242355 |
| 0  | 0199  | 0.393872 | 0.159575 | 0.754054 |
| 0  | 0200  | 0.893538 | 0.131229 | 0.745250 |
| 0  | 0201  | 0.639001 | 0.638560 | 0.256173 |
| 0  | 0202  | 0.899136 | 0.336690 | 0.760778 |
| 0  | 0203  | 0.646992 | 0.822999 | 0.226533 |
| 0  | 0204  | 0.221082 | 0.745499 | 0.159408 |
| 0  | 0205  | 0.318320 | 0.245769 | 0.660896 |
| 0  | 0206  | 0.836488 | 0.233227 | 0.835061 |
| 0  | 0207  | 0.715763 | 0.743539 | 0.343638 |
| 0  | 0208  | 0.803263 | 0.737233 | 0.570760 |
| Al | Al209 | 0.711623 | 0.660625 | 0.311479 |
| Si | Si210 | 0.443939 | 0.050721 | 0.190712 |



|    |       |          |          |          |
|----|-------|----------|----------|----------|
| Si | Si211 | 0.097182 | 0.552189 | 0.684293 |
| Si | Si212 | 0.448999 | 0.432872 | 0.181152 |
| Si | Si213 | 0.090042 | 0.933345 | 0.686079 |
| Si | Si214 | 0.591478 | 0.935780 | 0.809588 |
| Si | Si215 | 0.943591 | 0.440489 | 0.326741 |
| Si | Si216 | 0.590663 | 0.543086 | 0.835241 |
| Si | Si217 | 0.944913 | 0.048851 | 0.318978 |
| Si | Si218 | 0.338050 | 0.024665 | 0.344040 |
| Si | Si219 | 0.202978 | 0.525847 | 0.838817 |
| Si | Si220 | 0.337339 | 0.464506 | 0.331388 |
| Si | Si221 | 0.197552 | 0.965234 | 0.837615 |
| Si | Si222 | 0.698555 | 0.963611 | 0.655381 |
| Si | Si223 | 0.838918 | 0.461149 | 0.162330 |
| Si | Si224 | 0.709813 | 0.514438 | 0.696121 |
| Si | Si225 | 0.837358 | 0.018962 | 0.162851 |
| Si | Si226 | 0.296525 | 0.047429 | 0.562411 |
| Si | Si227 | 0.240977 | 0.546893 | 0.058168 |
| Si | Si228 | 0.296304 | 0.438090 | 0.547571 |
| Si | Si229 | 0.241600 | 0.939977 | 0.053819 |
| Si | Si230 | 0.737894 | 0.938205 | 0.437460 |
| Si | Si231 | 0.800144 | 0.424765 | 0.950981 |
| Si | Si232 | 0.747150 | 0.548642 | 0.477440 |
| Si | Si233 | 0.790999 | 0.044589 | 0.949876 |
| Si | Si234 | 0.141189 | 0.054426 | 0.548236 |
| Si | Si235 | 0.395582 | 0.552925 | 0.044717 |
| Si | Si236 | 0.142890 | 0.429718 | 0.544609 |
| Si | Si237 | 0.395328 | 0.931657 | 0.047739 |
| Si | Si238 | 0.893334 | 0.924867 | 0.451202 |
| Si | Si239 | 0.644711 | 0.424625 | 0.969740 |
| Si | Si240 | 0.900480 | 0.564377 | 0.465906 |
| Si | Si241 | 0.638202 | 0.053531 | 0.957944 |
| Si | Si242 | 0.095718 | 0.024844 | 0.331375 |
| Si | Si243 | 0.442616 | 0.519548 | 0.830659 |
| Si | Si244 | 0.093488 | 0.464723 | 0.333812 |
| Si | Si245 | 0.442202 | 0.963265 | 0.833652 |
| Si | Si246 | 0.942618 | 0.957575 | 0.661450 |
| Si | Si247 | 0.596496 | 0.462483 | 0.177682 |
| Si | Si248 | 0.948994 | 0.523815 | 0.676006 |
| Si | Si249 | 0.592410 | 0.022114 | 0.170808 |
| Si | Si250 | 0.219020 | 0.061629 | 0.207743 |
| Si | Si251 | 0.321907 | 0.557783 | 0.702914 |
| Si | Si252 | 0.212930 | 0.425599 | 0.206504 |
| Si | Si253 | 0.319159 | 0.923918 | 0.709879 |
| Si | Si254 | 0.815910 | 0.926382 | 0.792323 |

|    |       |          |          |          |
|----|-------|----------|----------|----------|
| Si | Si255 | 0.719375 | 0.438090 | 0.309778 |
| Si | Si256 | 0.832282 | 0.551950 | 0.821483 |
| Si | Si257 | 0.716689 | 0.063736 | 0.292647 |
| Si | Si258 | 0.446252 | 0.820643 | 0.187608 |
| Si | Si259 | 0.095412 | 0.320815 | 0.692165 |
| Si | Si260 | 0.442297 | 0.663963 | 0.189034 |
| Si | Si261 | 0.093271 | 0.163917 | 0.693794 |
| Si | Si262 | 0.592431 | 0.162395 | 0.807435 |
| Si | Si263 | 0.950522 | 0.664338 | 0.308566 |
| Si | Si264 | 0.596195 | 0.320214 | 0.814055 |
| Si | Si265 | 0.948320 | 0.821988 | 0.298892 |
| Si | Si266 | 0.338361 | 0.865104 | 0.335118 |
| Si | Si267 | 0.206875 | 0.366756 | 0.833714 |
| Si | Si268 | 0.334256 | 0.622842 | 0.335194 |
| Si | Si269 | 0.203315 | 0.123274 | 0.838344 |
| Si | Si270 | 0.704637 | 0.122925 | 0.660252 |
| Si | Si271 | 0.834534 | 0.617803 | 0.177671 |
| Si | Si272 | 0.711804 | 0.358340 | 0.673488 |
| Si | Si273 | 0.835849 | 0.859491 | 0.158665 |
| Si | Si274 | 0.290940 | 0.821392 | 0.543129 |
| Si | Si275 | 0.251084 | 0.323163 | 0.045084 |
| Si | Si276 | 0.290468 | 0.662224 | 0.546882 |
| Si | Si277 | 0.250861 | 0.163541 | 0.046844 |
| Si | Si278 | 0.748204 | 0.168585 | 0.450754 |
| Si | Si279 | 0.788359 | 0.663923 | 0.967133 |
| Si | Si280 | 0.750802 | 0.327055 | 0.457141 |
| Si | Si281 | 0.790283 | 0.818922 | 0.944919 |
| Si | Si282 | 0.138170 | 0.820729 | 0.541305 |
| Si | Si283 | 0.404034 | 0.317827 | 0.040203 |
| Si | Si284 | 0.137219 | 0.665505 | 0.538609 |
| Si | Si285 | 0.403519 | 0.163080 | 0.041792 |
| Si | Si286 | 0.901986 | 0.167728 | 0.456558 |
| Si | Si287 | 0.634524 | 0.665582 | 0.959650 |
| Si | Si288 | 0.904816 | 0.321823 | 0.464727 |
| Si | Si289 | 0.635882 | 0.820536 | 0.946684 |
| Si | Si290 | 0.093145 | 0.866537 | 0.330227 |
| Si | Si291 | 0.449060 | 0.362055 | 0.828036 |
| Si | Si292 | 0.096076 | 0.621338 | 0.323323 |
| Si | Si293 | 0.445547 | 0.121706 | 0.825807 |
| Si | Si294 | 0.949272 | 0.114912 | 0.663519 |
| Si | Si295 | 0.589106 | 0.618445 | 0.170511 |
| Si | Si296 | 0.949335 | 0.365371 | 0.678277 |
| Si | Si297 | 0.593417 | 0.863473 | 0.162302 |
| Si | Si298 | 0.215356 | 0.821139 | 0.201264 |

|    |       |          |          |          |
|----|-------|----------|----------|----------|
| Si | Si299 | 0.328126 | 0.322332 | 0.696724 |
| Si | Si300 | 0.216568 | 0.669176 | 0.198353 |
| Si | Si301 | 0.322336 | 0.170214 | 0.703408 |
| Si | Si302 | 0.826607 | 0.157560 | 0.796554 |
| Si | Si303 | 0.829224 | 0.310205 | 0.802009 |
| Si | Si304 | 0.713996 | 0.815270 | 0.292032 |
| Zn | Zn305 | 0.717403 | 0.758684 | 0.589632 |

### TS-C<sub>4</sub>H<sub>9</sub>ZnOH-HTransfer-Concerted-ZnOH<sup>+</sup> (Fig. 5/TS4)

Total energy = -1936.51906512 eV

data\_

\_audit\_creation\_method 'Materials Studio'

\_cell\_length\_a 20.357621

\_cell\_length\_b 20.050598

\_cell\_length\_c 13.476578

\_cell\_angle\_alpha 90.000000

\_cell\_angle\_beta 90.000000

\_cell\_angle\_gamma 90.000000

\_symmetry\_space\_group\_name\_H-M 'P1'

loop\_

\_atom\_site\_type\_symbol

\_atom\_site\_label

\_atom\_site\_fract\_x

\_atom\_site\_fract\_y

\_atom\_site\_fract\_z

|   |     |          |          |          |
|---|-----|----------|----------|----------|
| H | H1  | 0.851316 | 0.746200 | 0.560141 |
| H | H2  | 0.643106 | 0.811254 | 0.578342 |
| H | H3  | 0.643445 | 0.638331 | 0.503217 |
| H | H4  | 0.670653 | 0.760841 | 0.681237 |
| H | H5  | 0.583572 | 0.685944 | 0.652087 |
| H | H6  | 0.612995 | 0.654692 | 0.537084 |
| H | H7  | 0.561517 | 0.762060 | 0.455786 |
| H | H8  | 0.518387 | 0.779764 | 0.565487 |
| H | H9  | 0.511886 | 0.646285 | 0.453064 |
| H | H10 | 0.449993 | 0.707847 | 0.458444 |
| H | H11 | 0.471247 | 0.663038 | 0.567077 |
| C | C12 | 0.653768 | 0.760656 | 0.604239 |
| C | C13 | 0.597769 | 0.717357 | 0.589287 |
| C | C14 | 0.541954 | 0.739028 | 0.523465 |
| C | C15 | 0.490829 | 0.685748 | 0.499327 |
| O | O16 | 0.518548 | 0.035179 | 0.213787 |
| O | O17 | 0.027602 | 0.532758 | 0.711412 |
| O | O18 | 0.518300 | 0.443991 | 0.210170 |
| O | O19 | 0.012838 | 0.930340 | 0.703074 |

|   |     |          |          |          |
|---|-----|----------|----------|----------|
| 0 | 020 | 0.515248 | 0.945106 | 0.785564 |
| 0 | 021 | 0.011337 | 0.457698 | 0.289206 |
| 0 | 022 | 0.520789 | 0.535014 | 0.787262 |
| 0 | 023 | 0.022204 | 0.043589 | 0.290390 |
| 0 | 024 | 0.401846 | 0.056225 | 0.290136 |
| 0 | 025 | 0.150368 | 0.562830 | 0.754962 |
| 0 | 026 | 0.391201 | 0.429522 | 0.245481 |
| 0 | 027 | 0.129221 | 0.943661 | 0.784390 |
| 0 | 028 | 0.631804 | 0.934313 | 0.705504 |
| 0 | 029 | 0.889616 | 0.429090 | 0.238800 |
| 0 | 030 | 0.646957 | 0.547714 | 0.753468 |
| 0 | 031 | 0.902613 | 0.037091 | 0.221213 |
| 0 | 032 | 0.437523 | 0.122356 | 0.128924 |
| 0 | 033 | 0.094473 | 0.614121 | 0.594133 |
| 0 | 034 | 0.448068 | 0.367098 | 0.093874 |
| 0 | 035 | 0.113052 | 0.860818 | 0.633203 |
| 0 | 036 | 0.601197 | 0.857770 | 0.857443 |
| 0 | 037 | 0.943388 | 0.370870 | 0.395402 |
| 0 | 038 | 0.589962 | 0.615523 | 0.899096 |
| 0 | 039 | 0.930979 | 0.122392 | 0.367285 |
| 0 | 040 | 0.411302 | 0.993446 | 0.118208 |
| 0 | 041 | 0.125225 | 0.485287 | 0.601088 |
| 0 | 042 | 0.432966 | 0.498603 | 0.087256 |
| 0 | 043 | 0.106681 | 0.991154 | 0.601820 |
| 0 | 044 | 0.621408 | 0.987156 | 0.884915 |
| 0 | 045 | 0.911253 | 0.499108 | 0.401562 |
| 0 | 046 | 0.604452 | 0.483667 | 0.915970 |
| 0 | 047 | 0.930018 | 0.992808 | 0.404896 |
| 0 | 048 | 0.339799 | 0.039104 | 0.458753 |
| 0 | 049 | 0.201343 | 0.549681 | 0.933449 |
| 0 | 050 | 0.338804 | 0.444711 | 0.424392 |
| 0 | 051 | 0.196491 | 0.950334 | 0.951170 |
| 0 | 052 | 0.697977 | 0.940359 | 0.541883 |
| 0 | 053 | 0.834229 | 0.425528 | 0.064061 |
| 0 | 054 | 0.704894 | 0.530800 | 0.581539 |
| 0 | 055 | 0.837566 | 0.034353 | 0.050721 |
| 0 | 056 | 0.338228 | 0.943387 | 0.319238 |
| 0 | 057 | 0.195008 | 0.445157 | 0.811369 |
| 0 | 058 | 0.336187 | 0.543999 | 0.292850 |
| 0 | 059 | 0.210054 | 0.045243 | 0.812453 |
| 0 | 060 | 0.705299 | 0.041283 | 0.673671 |
| 0 | 061 | 0.843342 | 0.541383 | 0.158384 |
| 0 | 062 | 0.712976 | 0.435847 | 0.717841 |
| 0 | 063 | 0.823784 | 0.935060 | 0.181431 |

|   |      |          |          |          |
|---|------|----------|----------|----------|
| 0 | 064  | 0.270682 | 0.054842 | 0.294886 |
| 0 | 065  | 0.278954 | 0.543846 | 0.777873 |
| 0 | 066  | 0.261501 | 0.437413 | 0.268833 |
| 0 | 067  | 0.258536 | 0.925176 | 0.782005 |
| 0 | 068  | 0.763020 | 0.925956 | 0.709044 |
| 0 | 069  | 0.760741 | 0.447298 | 0.220615 |
| 0 | 070  | 0.776657 | 0.550492 | 0.741131 |
| 0 | 071  | 0.773959 | 0.054644 | 0.218691 |
| 0 | 072  | 0.311361 | 0.117936 | 0.610497 |
| 0 | 073  | 0.228860 | 0.625344 | 0.087426 |
| 0 | 074  | 0.322894 | 0.362833 | 0.574746 |
| 0 | 075  | 0.218450 | 0.871859 | 0.105353 |
| 0 | 076  | 0.717279 | 0.873864 | 0.377942 |
| 0 | 077  | 0.811528 | 0.351781 | 0.906667 |
| 0 | 078  | 0.706447 | 0.623541 | 0.446879 |
| 0 | 079  | 0.811912 | 0.110546 | 0.894779 |
| 0 | 080  | 0.220164 | 0.036715 | 0.534504 |
| 0 | 081  | 0.316947 | 0.537753 | 0.023517 |
| 0 | 082  | 0.219569 | 0.425962 | 0.498884 |
| 0 | 083  | 0.317953 | 0.934038 | 0.013696 |
| 0 | 084  | 0.814917 | 0.945413 | 0.456346 |
| 0 | 085  | 0.720883 | 0.438017 | 0.967551 |
| 0 | 086  | 0.819127 | 0.564387 | 0.499123 |
| 0 | 087  | 0.714946 | 0.047348 | 0.989082 |
| 0 | 088  | 0.320643 | 0.987282 | 0.635112 |
| 0 | 089  | 0.208298 | 0.495521 | 0.110930 |
| 0 | 090  | 0.307748 | 0.493126 | 0.601291 |
| 0 | 091  | 0.233969 | 0.001899 | 0.123438 |
| 0 | 092  | 0.712044 | 0.005739 | 0.375749 |
| 0 | 093  | 0.831819 | 0.480912 | 0.886406 |
| 0 | 094  | 0.730168 | 0.496919 | 0.396554 |
| 0 | 095  | 0.799041 | 0.980060 | 0.880411 |
| 0 | 096  | 0.131344 | 0.121672 | 0.602395 |
| 0 | 097  | 0.405476 | 0.628619 | 0.079046 |
| 0 | 098  | 0.124103 | 0.353593 | 0.579513 |
| 0 | 099  | 0.412206 | 0.861848 | 0.094843 |
| 0 | 0100 | 0.906957 | 0.862678 | 0.388747 |
| 0 | 0101 | 0.625769 | 0.352881 | 0.916559 |
| 0 | 0102 | 0.920296 | 0.630775 | 0.418737 |
| 0 | 0103 | 0.623696 | 0.119334 | 0.899397 |
| 0 | 0104 | 0.109747 | 0.059306 | 0.434329 |
| 0 | 0105 | 0.422988 | 0.559764 | 0.913743 |
| 0 | 0106 | 0.098845 | 0.430592 | 0.426785 |
| 0 | 0107 | 0.440272 | 0.940121 | 0.944626 |

|   |      |          |          |          |
|---|------|----------|----------|----------|
| 0 | 0108 | 0.920406 | 0.916613 | 0.564776 |
| 0 | 0109 | 0.617763 | 0.419182 | 0.086014 |
| 0 | 0110 | 0.937892 | 0.556057 | 0.575237 |
| 0 | 0111 | 0.592288 | 0.045846 | 0.054481 |
| 0 | 0112 | 0.145265 | 0.055874 | 0.244229 |
| 0 | 0113 | 0.401999 | 0.539281 | 0.719849 |
| 0 | 0114 | 0.133306 | 0.429326 | 0.236486 |
| 0 | 0115 | 0.388870 | 0.918856 | 0.766346 |
| 0 | 0116 | 0.889631 | 0.939688 | 0.753491 |
| 0 | 0117 | 0.637590 | 0.447457 | 0.278038 |
| 0 | 0118 | 0.905503 | 0.553504 | 0.766857 |
| 0 | 0119 | 0.644260 | 0.064935 | 0.233267 |
| 0 | 0120 | 0.107455 | 0.945860 | 0.334987 |
| 0 | 0121 | 0.436167 | 0.439016 | 0.838123 |
| 0 | 0122 | 0.107994 | 0.543993 | 0.327162 |
| 0 | 0123 | 0.426422 | 0.040374 | 0.818098 |
| 0 | 0124 | 0.942492 | 0.034564 | 0.641658 |
| 0 | 0125 | 0.598436 | 0.541607 | 0.150881 |
| 0 | 0126 | 0.935866 | 0.441463 | 0.671212 |
| 0 | 0127 | 0.610093 | 0.943245 | 0.176625 |
| 0 | 0128 | 0.227715 | 0.132322 | 0.149064 |
| 0 | 0129 | 0.321274 | 0.622558 | 0.632582 |
| 0 | 0130 | 0.215464 | 0.362800 | 0.123797 |
| 0 | 0131 | 0.314163 | 0.854091 | 0.641144 |
| 0 | 0132 | 0.816883 | 0.851857 | 0.848484 |
| 0 | 0133 | 0.721743 | 0.367170 | 0.366317 |
| 0 | 0134 | 0.828045 | 0.613571 | 0.894845 |
| 0 | 0135 | 0.720257 | 0.136297 | 0.350171 |
| 0 | 0136 | 0.519453 | 0.850103 | 0.208810 |
| 0 | 0137 | 0.027807 | 0.350979 | 0.713853 |
| 0 | 0138 | 0.506853 | 0.628955 | 0.203192 |
| 0 | 0139 | 0.020688 | 0.130331 | 0.708851 |
| 0 | 0140 | 0.519053 | 0.130712 | 0.780851 |
| 0 | 0141 | 0.014840 | 0.632886 | 0.283885 |
| 0 | 0142 | 0.527144 | 0.349997 | 0.786060 |
| 0 | 0143 | 0.017902 | 0.855573 | 0.284904 |
| 0 | 0144 | 0.403393 | 0.829968 | 0.285411 |
| 0 | 0145 | 0.150466 | 0.325414 | 0.767849 |
| 0 | 0146 | 0.389001 | 0.662130 | 0.269555 |
| 0 | 0147 | 0.134913 | 0.153578 | 0.793051 |
| 0 | 0148 | 0.636624 | 0.151885 | 0.709474 |
| 0 | 0149 | 0.893873 | 0.653468 | 0.227419 |
| 0 | 0150 | 0.647908 | 0.322960 | 0.725947 |
| 0 | 0151 | 0.904214 | 0.829840 | 0.199965 |

|   |      |          |          |          |
|---|------|----------|----------|----------|
| 0 | 0152 | 0.450880 | 0.743688 | 0.150396 |
| 0 | 0153 | 0.087091 | 0.238759 | 0.657548 |
| 0 | 0154 | 0.586106 | 0.237689 | 0.841305 |
| 0 | 0155 | 0.954837 | 0.745251 | 0.334758 |
| 0 | 0156 | 0.335977 | 0.844463 | 0.448857 |
| 0 | 0157 | 0.216017 | 0.342760 | 0.931474 |
| 0 | 0158 | 0.329681 | 0.634147 | 0.438343 |
| 0 | 0159 | 0.206048 | 0.136915 | 0.954887 |
| 0 | 0160 | 0.704503 | 0.141377 | 0.545381 |
| 0 | 0161 | 0.813997 | 0.658374 | 0.078735 |
| 0 | 0162 | 0.710573 | 0.353551 | 0.560584 |
| 0 | 0163 | 0.828738 | 0.839623 | 0.043577 |
| 0 | 0164 | 0.273059 | 0.833497 | 0.276554 |
| 0 | 0165 | 0.279485 | 0.350864 | 0.760545 |
| 0 | 0166 | 0.258556 | 0.649985 | 0.277281 |
| 0 | 0167 | 0.265308 | 0.162591 | 0.784216 |
| 0 | 0168 | 0.766976 | 0.152444 | 0.718289 |
| 0 | 0169 | 0.766860 | 0.626657 | 0.256658 |
| 0 | 0170 | 0.779545 | 0.322735 | 0.719160 |
| 0 | 0171 | 0.774671 | 0.816454 | 0.220169 |
| 0 | 0172 | 0.300815 | 0.738630 | 0.552530 |
| 0 | 0173 | 0.244152 | 0.244342 | 0.054879 |
| 0 | 0174 | 0.738181 | 0.249331 | 0.444461 |
| 0 | 0175 | 0.791884 | 0.737266 | 0.927135 |
| 0 | 0176 | 0.214373 | 0.835377 | 0.515061 |
| 0 | 0177 | 0.328729 | 0.343469 | 0.028767 |
| 0 | 0178 | 0.213209 | 0.641010 | 0.525447 |
| 0 | 0179 | 0.327558 | 0.143556 | 0.023621 |
| 0 | 0180 | 0.823485 | 0.149711 | 0.470458 |
| 0 | 0181 | 0.708743 | 0.638730 | 0.966133 |
| 0 | 0182 | 0.827663 | 0.344003 | 0.476554 |
| 0 | 0183 | 0.710754 | 0.838986 | 0.963245 |
| 0 | 0184 | 0.129712 | 0.739791 | 0.566768 |
| 0 | 0185 | 0.410869 | 0.242015 | 0.065825 |
| 0 | 0186 | 0.910063 | 0.245524 | 0.427460 |
| 0 | 0187 | 0.626480 | 0.739974 | 0.928576 |
| 0 | 0188 | 0.094474 | 0.835770 | 0.440596 |
| 0 | 0189 | 0.431251 | 0.317764 | 0.911486 |
| 0 | 0190 | 0.109211 | 0.663105 | 0.411661 |
| 0 | 0191 | 0.442800 | 0.146000 | 0.935984 |
| 0 | 0192 | 0.938568 | 0.153508 | 0.560699 |
| 0 | 0193 | 0.604615 | 0.663785 | 0.082815 |
| 0 | 0194 | 0.936652 | 0.324314 | 0.579684 |
| 0 | 0195 | 0.595067 | 0.841129 | 0.051375 |

|    |       |          |          |          |
|----|-------|----------|----------|----------|
| O  | O196  | 0.143969 | 0.830931 | 0.257000 |
| O  | O197  | 0.405792 | 0.336326 | 0.720656 |
| O  | O198  | 0.135109 | 0.651550 | 0.219471 |
| O  | O199  | 0.393710 | 0.159179 | 0.752977 |
| O  | O200  | 0.894219 | 0.134339 | 0.746090 |
| O  | O201  | 0.626225 | 0.642511 | 0.275331 |
| O  | O202  | 0.905091 | 0.332243 | 0.770802 |
| O  | O203  | 0.645549 | 0.822486 | 0.231532 |
| O  | O204  | 0.217077 | 0.746093 | 0.156503 |
| O  | O205  | 0.320161 | 0.245055 | 0.656584 |
| O  | O206  | 0.832751 | 0.232546 | 0.838026 |
| O  | O207  | 0.710010 | 0.744935 | 0.356619 |
| O  | O208  | 0.824278 | 0.749006 | 0.501350 |
| Al | Al209 | 0.702805 | 0.659652 | 0.324377 |
| Si | Si210 | 0.442730 | 0.051774 | 0.187009 |
| Si | Si211 | 0.099290 | 0.548668 | 0.664814 |
| Si | Si212 | 0.446791 | 0.435177 | 0.159387 |
| Si | Si213 | 0.090839 | 0.931702 | 0.680280 |
| Si | Si214 | 0.591997 | 0.931518 | 0.809666 |
| Si | Si215 | 0.938933 | 0.439496 | 0.331638 |
| Si | Si216 | 0.591628 | 0.544996 | 0.840077 |
| Si | Si217 | 0.945610 | 0.048956 | 0.321163 |
| Si | Si218 | 0.337419 | 0.023093 | 0.341117 |
| Si | Si219 | 0.206402 | 0.525055 | 0.819532 |
| Si | Si220 | 0.332078 | 0.463750 | 0.307954 |
| Si | Si221 | 0.198635 | 0.966068 | 0.833205 |
| Si | Si222 | 0.699860 | 0.961430 | 0.657576 |
| Si | Si223 | 0.832099 | 0.461964 | 0.171389 |
| Si | Si224 | 0.710545 | 0.515751 | 0.698871 |
| Si | Si225 | 0.834660 | 0.015003 | 0.167809 |
| Si | Si226 | 0.297587 | 0.045851 | 0.560259 |
| Si | Si227 | 0.239105 | 0.552178 | 0.039111 |
| Si | Si228 | 0.297174 | 0.431604 | 0.525094 |
| Si | Si229 | 0.241608 | 0.939212 | 0.049096 |
| Si | Si230 | 0.736614 | 0.941112 | 0.436629 |
| Si | Si231 | 0.799220 | 0.424183 | 0.956498 |
| Si | Si232 | 0.741423 | 0.553360 | 0.480029 |
| Si | Si233 | 0.791309 | 0.043439 | 0.953480 |
| Si | Si234 | 0.142165 | 0.052077 | 0.543462 |
| Si | Si235 | 0.394544 | 0.556390 | 0.026269 |
| Si | Si236 | 0.142131 | 0.424115 | 0.526835 |
| Si | Si237 | 0.395240 | 0.932598 | 0.043155 |
| Si | Si238 | 0.892883 | 0.928761 | 0.453207 |
| Si | Si239 | 0.642626 | 0.423122 | 0.971801 |



|    |       |          |          |          |
|----|-------|----------|----------|----------|
| Si | Si240 | 0.896968 | 0.562819 | 0.472726 |
| Si | Si241 | 0.638239 | 0.049917 | 0.956463 |
| Si | Si242 | 0.095798 | 0.025758 | 0.326536 |
| Si | Si243 | 0.445212 | 0.518169 | 0.815769 |
| Si | Si244 | 0.087935 | 0.465560 | 0.319395 |
| Si | Si245 | 0.442608 | 0.961332 | 0.828397 |
| Si | Si246 | 0.941416 | 0.955394 | 0.665712 |
| Si | Si247 | 0.593312 | 0.463421 | 0.180845 |
| Si | Si248 | 0.951374 | 0.520804 | 0.681422 |
| Si | Si249 | 0.591506 | 0.022094 | 0.169958 |
| Si | Si250 | 0.219459 | 0.060600 | 0.202926 |
| Si | Si251 | 0.327120 | 0.549252 | 0.682376 |
| Si | Si252 | 0.204971 | 0.431551 | 0.184421 |
| Si | Si253 | 0.320147 | 0.921942 | 0.705747 |
| Si | Si254 | 0.817415 | 0.924992 | 0.797406 |
| Si | Si255 | 0.712745 | 0.439949 | 0.315616 |
| Si | Si256 | 0.835353 | 0.549464 | 0.823197 |
| Si | Si257 | 0.712857 | 0.065041 | 0.294139 |
| Si | Si258 | 0.446681 | 0.820973 | 0.184813 |
| Si | Si259 | 0.097012 | 0.317457 | 0.679534 |
| Si | Si260 | 0.438610 | 0.665435 | 0.174915 |
| Si | Si261 | 0.093248 | 0.161407 | 0.690501 |
| Si | Si262 | 0.591240 | 0.160289 | 0.807701 |
| Si | Si263 | 0.945002 | 0.665998 | 0.316621 |
| Si | Si264 | 0.596717 | 0.316211 | 0.817950 |
| Si | Si265 | 0.945852 | 0.822330 | 0.302649 |
| Si | Si266 | 0.337443 | 0.863085 | 0.331936 |
| Si | Si267 | 0.210701 | 0.366105 | 0.817419 |
| Si | Si268 | 0.328154 | 0.622377 | 0.319463 |
| Si | Si269 | 0.203739 | 0.124497 | 0.836103 |
| Si | Si270 | 0.703416 | 0.121769 | 0.661753 |
| Si | Si271 | 0.827700 | 0.619701 | 0.182803 |
| Si | Si272 | 0.712689 | 0.358673 | 0.680522 |
| Si | Si273 | 0.832941 | 0.855341 | 0.161374 |
| Si | Si274 | 0.290812 | 0.818024 | 0.539786 |
| Si | Si275 | 0.251342 | 0.323198 | 0.034691 |
| Si | Si276 | 0.290589 | 0.659547 | 0.536443 |
| Si | Si277 | 0.251426 | 0.164644 | 0.045160 |
| Si | Si278 | 0.746813 | 0.169532 | 0.452295 |
| Si | Si279 | 0.785823 | 0.661407 | 0.967489 |
| Si | Si280 | 0.749799 | 0.328085 | 0.462233 |
| Si | Si281 | 0.787164 | 0.816525 | 0.946971 |
| Si | Si282 | 0.137523 | 0.818050 | 0.538462 |
| Si | Si283 | 0.404657 | 0.317829 | 0.025123 |

|    |       |          |          |          |
|----|-------|----------|----------|----------|
| Si | Si284 | 0.136510 | 0.664316 | 0.524481 |
| Si | Si285 | 0.404632 | 0.163533 | 0.038379 |
| Si | Si286 | 0.901071 | 0.167406 | 0.456329 |
| Si | Si287 | 0.632669 | 0.664175 | 0.970625 |
| Si | Si288 | 0.904375 | 0.321240 | 0.469610 |
| Si | Si289 | 0.633548 | 0.819077 | 0.951273 |
| Si | Si290 | 0.091009 | 0.866848 | 0.329089 |
| Si | Si291 | 0.450243 | 0.360966 | 0.813622 |
| Si | Si292 | 0.091405 | 0.622635 | 0.310609 |
| Si | Si293 | 0.445134 | 0.119082 | 0.822401 |
| Si | Si294 | 0.948539 | 0.113541 | 0.664346 |
| Si | Si295 | 0.585177 | 0.619529 | 0.180790 |
| Si | Si296 | 0.951346 | 0.362454 | 0.683742 |
| Si | Si297 | 0.592930 | 0.864243 | 0.166924 |
| Si | Si298 | 0.213096 | 0.821521 | 0.199050 |
| Si | Si299 | 0.331929 | 0.323546 | 0.678858 |
| Si | Si300 | 0.209741 | 0.668044 | 0.185161 |
| Si | Si301 | 0.322669 | 0.170010 | 0.700829 |
| Si | Si302 | 0.826324 | 0.156730 | 0.798777 |
| Si | Si303 | 0.832396 | 0.310583 | 0.808419 |
| Si | Si304 | 0.712593 | 0.814556 | 0.296339 |
| Zn | Zn305 | 0.736314 | 0.745356 | 0.525658 |

**C<sub>4</sub>H<sub>10</sub>-Phys.Ads-ZnH<sup>+</sup> (Fig. 6/M1)** Total energy = -1933.49955536 eV

data\_

\_audit\_creation\_method 'Materials Studio'

\_cell\_length\_a 20.357621

\_cell\_length\_b 20.050598

\_cell\_length\_c 13.476578

\_cell\_angle\_alpha 90.000000

\_cell\_angle\_beta 90.000000

\_cell\_angle\_gamma 90.000000

\_symmetry\_space\_group\_name\_H-M 'P1'

loop\_

\_atom\_site\_type\_symbol

\_atom\_site\_label

\_atom\_site\_fract\_x

\_atom\_site\_fract\_y

\_atom\_site\_fract\_z

|   |    |          |          |          |
|---|----|----------|----------|----------|
| H | H1 | 0.742015 | 0.761636 | 0.586873 |
| H | H2 | 0.496840 | 0.818840 | 0.581795 |
| H | H3 | 0.537804 | 0.853321 | 0.477888 |
| H | H4 | 0.583501 | 0.815805 | 0.574608 |

|   |     |          |          |          |
|---|-----|----------|----------|----------|
| H | H5  | 0.573643 | 0.740207 | 0.423033 |
| H | H6  | 0.487955 | 0.742446 | 0.434505 |
| H | H7  | 0.495000 | 0.688121 | 0.601157 |
| H | H8  | 0.580981 | 0.686954 | 0.593532 |
| H | H9  | 0.487375 | 0.611912 | 0.452946 |
| H | H10 | 0.535037 | 0.575609 | 0.548839 |
| H | H11 | 0.573790 | 0.610741 | 0.443437 |
| C | C12 | 0.538259 | 0.811814 | 0.530807 |
| C | C13 | 0.533665 | 0.744403 | 0.477685 |
| C | C14 | 0.535978 | 0.684360 | 0.548321 |
| C | C15 | 0.532901 | 0.616743 | 0.495512 |
| O | O16 | 0.520372 | 0.035083 | 0.216742 |
| O | O17 | 0.020171 | 0.542978 | 0.715438 |
| O | O18 | 0.526743 | 0.439628 | 0.213765 |
| O | O19 | 0.012455 | 0.935449 | 0.706111 |
| O | O20 | 0.515245 | 0.948062 | 0.788932 |
| O | O21 | 0.022126 | 0.455121 | 0.292440 |
| O | O22 | 0.515522 | 0.540584 | 0.792814 |
| O | O23 | 0.020874 | 0.037964 | 0.294471 |
| O | O24 | 0.402714 | 0.059201 | 0.290955 |
| O | O25 | 0.136651 | 0.557020 | 0.793150 |
| O | O26 | 0.407057 | 0.436139 | 0.287991 |
| O | O27 | 0.128989 | 0.939839 | 0.789324 |
| O | O28 | 0.629165 | 0.949389 | 0.702010 |
| O | O29 | 0.905166 | 0.438326 | 0.213829 |
| O | O30 | 0.634865 | 0.537209 | 0.726509 |
| O | O31 | 0.904419 | 0.046116 | 0.213376 |
| O | O32 | 0.440760 | 0.121173 | 0.126679 |
| O | O33 | 0.106077 | 0.623972 | 0.630370 |
| O | O34 | 0.437988 | 0.362816 | 0.130264 |
| O | O35 | 0.109690 | 0.864740 | 0.629927 |
| O | O36 | 0.608519 | 0.863952 | 0.848308 |
| O | O37 | 0.938731 | 0.371388 | 0.375475 |
| O | O38 | 0.603821 | 0.619352 | 0.874448 |
| O | O39 | 0.933390 | 0.120569 | 0.371917 |
| O | O40 | 0.413957 | 0.992097 | 0.123226 |
| O | O41 | 0.124568 | 0.493110 | 0.621889 |
| O | O42 | 0.429444 | 0.494285 | 0.112995 |
| O | O43 | 0.110101 | 0.996225 | 0.612454 |
| O | O44 | 0.620201 | 0.992848 | 0.887458 |
| O | O45 | 0.915455 | 0.501913 | 0.384852 |
| O | O46 | 0.607525 | 0.488059 | 0.906156 |
| O | O47 | 0.917388 | 0.989927 | 0.390848 |
| O | O48 | 0.339935 | 0.039097 | 0.459507 |

|   |     |          |          |          |
|---|-----|----------|----------|----------|
| 0 | 049 | 0.198296 | 0.540109 | 0.961517 |
| 0 | 050 | 0.341909 | 0.452636 | 0.455971 |
| 0 | 051 | 0.196619 | 0.951182 | 0.954587 |
| 0 | 052 | 0.694052 | 0.937532 | 0.536480 |
| 0 | 053 | 0.840160 | 0.427202 | 0.046393 |
| 0 | 054 | 0.705524 | 0.538463 | 0.565218 |
| 0 | 055 | 0.838859 | 0.038446 | 0.043692 |
| 0 | 056 | 0.338436 | 0.946381 | 0.316546 |
| 0 | 057 | 0.205782 | 0.446914 | 0.819352 |
| 0 | 058 | 0.334332 | 0.544290 | 0.311871 |
| 0 | 059 | 0.207837 | 0.043856 | 0.812136 |
| 0 | 060 | 0.711480 | 0.045812 | 0.648441 |
| 0 | 061 | 0.851505 | 0.545835 | 0.129233 |
| 0 | 062 | 0.719493 | 0.438361 | 0.693872 |
| 0 | 063 | 0.830510 | 0.939769 | 0.175463 |
| 0 | 064 | 0.271349 | 0.057841 | 0.295760 |
| 0 | 065 | 0.267144 | 0.561651 | 0.797333 |
| 0 | 066 | 0.276622 | 0.427788 | 0.290160 |
| 0 | 067 | 0.258784 | 0.924924 | 0.785347 |
| 0 | 068 | 0.759095 | 0.930023 | 0.705788 |
| 0 | 069 | 0.775227 | 0.453683 | 0.210820 |
| 0 | 070 | 0.762705 | 0.558324 | 0.739549 |
| 0 | 071 | 0.774823 | 0.056931 | 0.211883 |
| 0 | 072 | 0.312880 | 0.121141 | 0.607025 |
| 0 | 073 | 0.229267 | 0.618297 | 0.112038 |
| 0 | 074 | 0.318817 | 0.373184 | 0.608077 |
| 0 | 075 | 0.222541 | 0.869338 | 0.103453 |
| 0 | 076 | 0.712919 | 0.874537 | 0.368645 |
| 0 | 077 | 0.808812 | 0.356596 | 0.889370 |
| 0 | 078 | 0.723794 | 0.632389 | 0.429802 |
| 0 | 079 | 0.811287 | 0.121178 | 0.896445 |
| 0 | 080 | 0.219366 | 0.042960 | 0.532214 |
| 0 | 081 | 0.317990 | 0.535486 | 0.034873 |
| 0 | 082 | 0.219876 | 0.436389 | 0.517387 |
| 0 | 083 | 0.318297 | 0.939185 | 0.017686 |
| 0 | 084 | 0.814234 | 0.927728 | 0.465369 |
| 0 | 085 | 0.722956 | 0.442968 | 0.962888 |
| 0 | 086 | 0.825202 | 0.560687 | 0.496302 |
| 0 | 087 | 0.715596 | 0.053698 | 0.986529 |
| 0 | 088 | 0.316679 | 0.991075 | 0.638135 |
| 0 | 089 | 0.217511 | 0.487983 | 0.138469 |
| 0 | 090 | 0.303120 | 0.503334 | 0.628679 |
| 0 | 091 | 0.229194 | 0.999431 | 0.130910 |
| 0 | 092 | 0.726872 | 0.005688 | 0.377103 |

|   |      |          |          |          |
|---|------|----------|----------|----------|
| 0 | 093  | 0.830214 | 0.486589 | 0.871334 |
| 0 | 094  | 0.734491 | 0.506152 | 0.379835 |
| 0 | 095  | 0.798573 | 0.991830 | 0.868697 |
| 0 | 096  | 0.129859 | 0.127112 | 0.603029 |
| 0 | 097  | 0.403916 | 0.624438 | 0.101255 |
| 0 | 098  | 0.129220 | 0.361115 | 0.601604 |
| 0 | 099  | 0.410251 | 0.861150 | 0.095834 |
| 0 | 0100 | 0.910486 | 0.856585 | 0.388811 |
| 0 | 0101 | 0.631471 | 0.357345 | 0.900869 |
| 0 | 0102 | 0.913655 | 0.634370 | 0.400632 |
| 0 | 0103 | 0.621622 | 0.125218 | 0.901388 |
| 0 | 0104 | 0.105091 | 0.059049 | 0.440510 |
| 0 | 0105 | 0.430379 | 0.555823 | 0.939815 |
| 0 | 0106 | 0.097364 | 0.437123 | 0.449517 |
| 0 | 0107 | 0.440313 | 0.940827 | 0.947500 |
| 0 | 0108 | 0.928870 | 0.919593 | 0.557071 |
| 0 | 0109 | 0.616592 | 0.418758 | 0.072544 |
| 0 | 0110 | 0.948070 | 0.561526 | 0.555336 |
| 0 | 0111 | 0.595287 | 0.051223 | 0.059192 |
| 0 | 0112 | 0.144477 | 0.059649 | 0.251981 |
| 0 | 0113 | 0.392819 | 0.553427 | 0.750483 |
| 0 | 0114 | 0.146840 | 0.420940 | 0.268800 |
| 0 | 0115 | 0.388826 | 0.924885 | 0.768281 |
| 0 | 0116 | 0.886470 | 0.950325 | 0.738806 |
| 0 | 0117 | 0.649592 | 0.450863 | 0.258252 |
| 0 | 0118 | 0.892664 | 0.556355 | 0.734594 |
| 0 | 0119 | 0.646156 | 0.057690 | 0.241549 |
| 0 | 0120 | 0.111885 | 0.946461 | 0.338196 |
| 0 | 0121 | 0.431973 | 0.442702 | 0.839036 |
| 0 | 0122 | 0.117280 | 0.541955 | 0.332798 |
| 0 | 0123 | 0.428368 | 0.044240 | 0.826152 |
| 0 | 0124 | 0.949370 | 0.039435 | 0.628719 |
| 0 | 0125 | 0.595457 | 0.540560 | 0.136231 |
| 0 | 0126 | 0.941050 | 0.447087 | 0.649039 |
| 0 | 0127 | 0.609263 | 0.941737 | 0.169230 |
| 0 | 0128 | 0.226253 | 0.131452 | 0.148415 |
| 0 | 0129 | 0.316898 | 0.633752 | 0.650736 |
| 0 | 0130 | 0.224599 | 0.354928 | 0.148859 |
| 0 | 0131 | 0.316956 | 0.857932 | 0.642866 |
| 0 | 0132 | 0.820744 | 0.863100 | 0.845238 |
| 0 | 0133 | 0.733353 | 0.374795 | 0.354252 |
| 0 | 0134 | 0.830827 | 0.619935 | 0.876706 |
| 0 | 0135 | 0.720829 | 0.135282 | 0.348587 |
| 0 | 0136 | 0.521274 | 0.846555 | 0.200723 |

|   |      |          |          |          |
|---|------|----------|----------|----------|
| 0 | 0137 | 0.022801 | 0.353079 | 0.716326 |
| 0 | 0138 | 0.516213 | 0.635449 | 0.202206 |
| 0 | 0139 | 0.019329 | 0.137628 | 0.709523 |
| 0 | 0140 | 0.518565 | 0.135812 | 0.780388 |
| 0 | 0141 | 0.022058 | 0.628435 | 0.290000 |
| 0 | 0142 | 0.523403 | 0.353230 | 0.788604 |
| 0 | 0143 | 0.021454 | 0.858556 | 0.283115 |
| 0 | 0144 | 0.407033 | 0.835065 | 0.288948 |
| 0 | 0145 | 0.139864 | 0.333823 | 0.793863 |
| 0 | 0146 | 0.403603 | 0.655785 | 0.292654 |
| 0 | 0147 | 0.134060 | 0.152791 | 0.796456 |
| 0 | 0148 | 0.636621 | 0.147563 | 0.707519 |
| 0 | 0149 | 0.910252 | 0.652114 | 0.204177 |
| 0 | 0150 | 0.638923 | 0.334169 | 0.706510 |
| 0 | 0151 | 0.908090 | 0.833280 | 0.195762 |
| 0 | 0152 | 0.444876 | 0.742750 | 0.158093 |
| 0 | 0153 | 0.091468 | 0.244338 | 0.668395 |
| 0 | 0154 | 0.590804 | 0.242288 | 0.828392 |
| 0 | 0155 | 0.961006 | 0.744585 | 0.321834 |
| 0 | 0156 | 0.337116 | 0.850085 | 0.450417 |
| 0 | 0157 | 0.208459 | 0.351846 | 0.955717 |
| 0 | 0158 | 0.336706 | 0.634670 | 0.456483 |
| 0 | 0159 | 0.207840 | 0.134913 | 0.954848 |
| 0 | 0160 | 0.704468 | 0.156832 | 0.542819 |
| 0 | 0161 | 0.827724 | 0.666841 | 0.060005 |
| 0 | 0162 | 0.708349 | 0.352229 | 0.543873 |
| 0 | 0163 | 0.833578 | 0.843388 | 0.037563 |
| 0 | 0164 | 0.276329 | 0.834551 | 0.277398 |
| 0 | 0165 | 0.270786 | 0.336068 | 0.784639 |
| 0 | 0166 | 0.272776 | 0.659191 | 0.289312 |
| 0 | 0167 | 0.264326 | 0.160384 | 0.781992 |
| 0 | 0168 | 0.766460 | 0.155133 | 0.716587 |
| 0 | 0169 | 0.783098 | 0.632462 | 0.238085 |
| 0 | 0170 | 0.769077 | 0.317743 | 0.709759 |
| 0 | 0171 | 0.778351 | 0.822864 | 0.213288 |
| 0 | 0172 | 0.299733 | 0.744166 | 0.551952 |
| 0 | 0173 | 0.245159 | 0.243028 | 0.052731 |
| 0 | 0174 | 0.742485 | 0.253302 | 0.421622 |
| 0 | 0175 | 0.797456 | 0.744899 | 0.912324 |
| 0 | 0176 | 0.215581 | 0.843444 | 0.518829 |
| 0 | 0177 | 0.328471 | 0.343407 | 0.028625 |
| 0 | 0178 | 0.215888 | 0.643437 | 0.526722 |
| 0 | 0179 | 0.328641 | 0.141613 | 0.027211 |
| 0 | 0180 | 0.823851 | 0.152943 | 0.467037 |

|    |       |          |          |          |
|----|-------|----------|----------|----------|
| O  | O181  | 0.716075 | 0.646475 | 0.963311 |
| O  | O182  | 0.830427 | 0.343952 | 0.478024 |
| O  | O183  | 0.714766 | 0.843013 | 0.960158 |
| O  | O184  | 0.135376 | 0.744112 | 0.570582 |
| O  | O185  | 0.408500 | 0.241972 | 0.073509 |
| O  | O186  | 0.911478 | 0.246564 | 0.418189 |
| O  | O187  | 0.631883 | 0.744029 | 0.916719 |
| O  | O188  | 0.097383 | 0.834129 | 0.438178 |
| O  | O189  | 0.443302 | 0.330054 | 0.938148 |
| O  | O190  | 0.100884 | 0.652816 | 0.438469 |
| O  | O191  | 0.442787 | 0.153426 | 0.935899 |
| O  | O192  | 0.936950 | 0.161370 | 0.561715 |
| O  | O193  | 0.603710 | 0.661627 | 0.062459 |
| O  | O194  | 0.946154 | 0.329153 | 0.562555 |
| O  | O195  | 0.596167 | 0.841868 | 0.040601 |
| O  | O196  | 0.147283 | 0.832235 | 0.255269 |
| O  | O197  | 0.398474 | 0.329980 | 0.751460 |
| O  | O198  | 0.145484 | 0.658396 | 0.252412 |
| O  | O199  | 0.392780 | 0.160307 | 0.753139 |
| O  | O200  | 0.892568 | 0.129295 | 0.743379 |
| O  | O201  | 0.641389 | 0.639152 | 0.249515 |
| O  | O202  | 0.895470 | 0.342893 | 0.744417 |
| O  | O203  | 0.648190 | 0.820133 | 0.218061 |
| O  | O204  | 0.221628 | 0.744630 | 0.160662 |
| O  | O205  | 0.318431 | 0.247041 | 0.658857 |
| O  | O206  | 0.839154 | 0.237573 | 0.822892 |
| O  | O207  | 0.717953 | 0.744930 | 0.341381 |
| Al | Al208 | 0.715175 | 0.658880 | 0.301809 |
| Si | Si209 | 0.444736 | 0.052119 | 0.188957 |
| Si | Si210 | 0.096943 | 0.554161 | 0.689163 |
| Si | Si211 | 0.449740 | 0.433423 | 0.186153 |
| Si | Si212 | 0.090702 | 0.934160 | 0.684020 |
| Si | Si213 | 0.593082 | 0.938575 | 0.807799 |
| Si | Si214 | 0.945404 | 0.441801 | 0.317286 |
| Si | Si215 | 0.591378 | 0.546487 | 0.826385 |
| Si | Si216 | 0.943792 | 0.048810 | 0.318297 |
| Si | Si217 | 0.338064 | 0.025555 | 0.341120 |
| Si | Si218 | 0.202192 | 0.526174 | 0.843534 |
| Si | Si219 | 0.340069 | 0.465142 | 0.337039 |
| Si | Si220 | 0.198173 | 0.964923 | 0.836142 |
| Si | Si221 | 0.698422 | 0.966041 | 0.648794 |
| Si | Si222 | 0.843170 | 0.466917 | 0.151150 |
| Si | Si223 | 0.705758 | 0.517777 | 0.681294 |
| Si | Si224 | 0.837299 | 0.020144 | 0.161003 |

|    |       |          |          |          |
|----|-------|----------|----------|----------|
| Si | Si225 | 0.296886 | 0.048719 | 0.559668 |
| Si | Si226 | 0.241024 | 0.545744 | 0.062587 |
| Si | Si227 | 0.296108 | 0.441180 | 0.553075 |
| Si | Si228 | 0.241701 | 0.939774 | 0.052390 |
| Si | Si229 | 0.737528 | 0.936502 | 0.435909 |
| Si | Si230 | 0.800384 | 0.428556 | 0.942297 |
| Si | Si231 | 0.747597 | 0.558501 | 0.468180 |
| Si | Si232 | 0.791435 | 0.051362 | 0.948721 |
| Si | Si233 | 0.141436 | 0.056247 | 0.547376 |
| Si | Si234 | 0.395403 | 0.552510 | 0.047632 |
| Si | Si235 | 0.142894 | 0.432177 | 0.548018 |
| Si | Si236 | 0.395510 | 0.933253 | 0.046185 |
| Si | Si237 | 0.893024 | 0.923977 | 0.449793 |
| Si | Si238 | 0.644871 | 0.426572 | 0.960522 |
| Si | Si239 | 0.901000 | 0.564392 | 0.458215 |
| Si | Si240 | 0.638158 | 0.055831 | 0.957959 |
| Si | Si241 | 0.095391 | 0.025681 | 0.331590 |
| Si | Si242 | 0.442605 | 0.522786 | 0.831451 |
| Si | Si243 | 0.095848 | 0.463739 | 0.335465 |
| Si | Si244 | 0.443141 | 0.964753 | 0.832423 |
| Si | Si245 | 0.943947 | 0.961053 | 0.658220 |
| Si | Si246 | 0.597246 | 0.462990 | 0.169962 |
| Si | Si247 | 0.949990 | 0.526786 | 0.664700 |
| Si | Si248 | 0.592859 | 0.021179 | 0.171404 |
| Si | Si249 | 0.217931 | 0.061306 | 0.206462 |
| Si | Si250 | 0.319783 | 0.562327 | 0.706824 |
| Si | Si251 | 0.216637 | 0.423550 | 0.211165 |
| Si | Si252 | 0.320102 | 0.925481 | 0.708251 |
| Si | Si253 | 0.816439 | 0.934207 | 0.789185 |
| Si | Si254 | 0.723390 | 0.446285 | 0.300674 |
| Si | Si255 | 0.829148 | 0.554691 | 0.806378 |
| Si | Si256 | 0.717154 | 0.063350 | 0.294294 |
| Si | Si257 | 0.446178 | 0.821120 | 0.185773 |
| Si | Si258 | 0.095552 | 0.322877 | 0.695061 |
| Si | Si259 | 0.443028 | 0.664577 | 0.188232 |
| Si | Si260 | 0.093434 | 0.165623 | 0.694174 |
| Si | Si261 | 0.591986 | 0.163179 | 0.804456 |
| Si | Si262 | 0.951698 | 0.665229 | 0.304036 |
| Si | Si263 | 0.595891 | 0.321537 | 0.806585 |
| Si | Si264 | 0.950463 | 0.822751 | 0.296995 |
| Si | Si265 | 0.339581 | 0.866482 | 0.332990 |
| Si | Si266 | 0.206268 | 0.367214 | 0.838043 |
| Si | Si267 | 0.336906 | 0.623361 | 0.337339 |
| Si | Si268 | 0.203427 | 0.123027 | 0.836308 |



|    |       |          |          |          |
|----|-------|----------|----------|----------|
| Si | Si269 | 0.704681 | 0.126207 | 0.654111 |
| Si | Si270 | 0.841379 | 0.623865 | 0.159891 |
| Si | Si271 | 0.708618 | 0.360594 | 0.663496 |
| Si | Si272 | 0.837828 | 0.860146 | 0.154740 |
| Si | Si273 | 0.291983 | 0.823673 | 0.541174 |
| Si | Si274 | 0.251887 | 0.322942 | 0.046757 |
| Si | Si275 | 0.292194 | 0.664386 | 0.546191 |
| Si | Si276 | 0.252239 | 0.163249 | 0.045528 |
| Si | Si277 | 0.747939 | 0.174500 | 0.445250 |
| Si | Si278 | 0.792783 | 0.668972 | 0.952833 |
| Si | Si279 | 0.753604 | 0.330817 | 0.449676 |
| Si | Si280 | 0.791486 | 0.823171 | 0.939642 |
| Si | Si281 | 0.139401 | 0.821818 | 0.539017 |
| Si | Si282 | 0.404623 | 0.319882 | 0.042372 |
| Si | Si283 | 0.139603 | 0.665954 | 0.541493 |
| Si | Si284 | 0.405135 | 0.164412 | 0.040720 |
| Si | Si285 | 0.901702 | 0.169820 | 0.454225 |
| Si | Si286 | 0.638838 | 0.667505 | 0.955064 |
| Si | Si287 | 0.906760 | 0.322943 | 0.458158 |
| Si | Si288 | 0.637965 | 0.822772 | 0.941817 |
| Si | Si289 | 0.094823 | 0.867703 | 0.328313 |
| Si | Si290 | 0.449117 | 0.364089 | 0.829087 |
| Si | Si291 | 0.096831 | 0.620263 | 0.328428 |
| Si | Si292 | 0.445381 | 0.123275 | 0.824058 |
| Si | Si293 | 0.949195 | 0.117344 | 0.661149 |
| Si | Si294 | 0.590534 | 0.619604 | 0.164519 |
| Si | Si295 | 0.951230 | 0.367997 | 0.668182 |
| Si | Si296 | 0.593610 | 0.862687 | 0.156914 |
| Si | Si297 | 0.217006 | 0.821059 | 0.199383 |
| Si | Si298 | 0.326541 | 0.322515 | 0.700725 |
| Si | Si299 | 0.217443 | 0.669148 | 0.203390 |
| Si | Si300 | 0.322103 | 0.171150 | 0.700185 |
| Si | Si301 | 0.827207 | 0.160346 | 0.794099 |
| Si | Si302 | 0.828092 | 0.314438 | 0.791316 |
| Si | Si303 | 0.714449 | 0.817064 | 0.284647 |
| Zn | Zn304 | 0.730780 | 0.724366 | 0.491183 |

**TS-C<sub>4</sub>H<sub>10</sub>-Dehydro-on-ZnH<sup>+</sup> (Fig. 6/TS1)** Total energy = -1930.75923127 eV

data\_

|                        |                    |
|------------------------|--------------------|
| _audit_creation_method | 'Materials Studio' |
| _cell_length_a         | 20.357621          |
| _cell_length_b         | 20.050598          |
| _cell_length_c         | 13.476578          |

```

_cell_angle_alpha      90.000000
_cell_angle_beta      90.000000
_cell_angle_gamma     90.000000
_symmetry_space_group_name_H-M  'P1'
loop_
_atom_site_type_symbol
_atom_site_label
_atom_site_fract_x
_atom_site_fract_y
_atom_site_fract_z
  H      H1          0.720341      0.751690      0.603801
  H      H2          0.488835      0.753793      0.813570
  H      H3          0.411578      0.740040      0.756438
  H      H4          0.457412      0.812243      0.727308
  H      H5          0.466623      0.726963      0.590709
  H      H6          0.496402      0.667989      0.676091
  H      H7          0.594485      0.739512      0.708611
  H      H8          0.565305      0.799522      0.624275
  H      H9          0.595806      0.654348      0.565987
  H      H10         0.667703      0.738711      0.593145
  H      H11         0.572040      0.719783      0.484347
  C      C12         0.461332      0.759017      0.744037
  C      C13         0.495267      0.721561      0.659435
  C      C14         0.565781      0.745709      0.640019
  C      C15         0.598598      0.708406      0.553371
  O      O16         0.522088      0.034578      0.221794
  O      O17         0.024261      0.536710      0.719144
  O      O18         0.531699      0.437122      0.214638
  O      O19         0.015297      0.938726      0.715116
  O      O20         0.520199      0.952061      0.798249
  O      O21         0.026990      0.454444      0.297031
  O      O22         0.519909      0.542914      0.798540
  O      O23         0.026179      0.041437      0.297833
  O      O24         0.405749      0.061397      0.296596
  O      O25         0.140358      0.559443      0.796810
  O      O26         0.413239      0.441756      0.293515
  O      O27         0.133325      0.942044      0.793814
  O      O28         0.634218      0.940521      0.711384
  O      O29         0.911966      0.434035      0.213120
  O      O30         0.638837      0.539777      0.728105
  O      O31         0.906010      0.040008      0.230642
  O      O32         0.443785      0.120813      0.129964
  O      O33         0.105189      0.622552      0.632489
  O      O34         0.437502      0.364274      0.138046

```

|   |     |          |          |          |
|---|-----|----------|----------|----------|
| 0 | 035 | 0.109357 | 0.865338 | 0.637155 |
| 0 | 036 | 0.608225 | 0.866469 | 0.867928 |
| 0 | 037 | 0.943666 | 0.367598 | 0.374816 |
| 0 | 038 | 0.609675 | 0.621518 | 0.877133 |
| 0 | 039 | 0.938578 | 0.119615 | 0.382856 |
| 0 | 040 | 0.414269 | 0.992057 | 0.130348 |
| 0 | 041 | 0.131841 | 0.493083 | 0.627345 |
| 0 | 042 | 0.435171 | 0.495655 | 0.115413 |
| 0 | 043 | 0.112159 | 0.996669 | 0.616126 |
| 0 | 044 | 0.629051 | 0.996919 | 0.888080 |
| 0 | 045 | 0.916996 | 0.497355 | 0.384866 |
| 0 | 046 | 0.613728 | 0.490034 | 0.908132 |
| 0 | 047 | 0.933310 | 0.988447 | 0.408623 |
| 0 | 048 | 0.344488 | 0.042534 | 0.467255 |
| 0 | 049 | 0.202067 | 0.543793 | 0.967055 |
| 0 | 050 | 0.346800 | 0.453498 | 0.460667 |
| 0 | 051 | 0.200029 | 0.954243 | 0.960251 |
| 0 | 052 | 0.700299 | 0.930391 | 0.547072 |
| 0 | 053 | 0.847007 | 0.428490 | 0.045527 |
| 0 | 054 | 0.708347 | 0.532079 | 0.565253 |
| 0 | 055 | 0.839270 | 0.034901 | 0.062560 |
| 0 | 056 | 0.344463 | 0.947717 | 0.327596 |
| 0 | 057 | 0.205117 | 0.447833 | 0.828759 |
| 0 | 058 | 0.337028 | 0.547312 | 0.320369 |
| 0 | 059 | 0.211231 | 0.046718 | 0.817910 |
| 0 | 060 | 0.703833 | 0.044045 | 0.647030 |
| 0 | 061 | 0.858447 | 0.543906 | 0.138899 |
| 0 | 062 | 0.719578 | 0.436638 | 0.701147 |
| 0 | 063 | 0.827332 | 0.936572 | 0.194072 |
| 0 | 064 | 0.274933 | 0.057968 | 0.304029 |
| 0 | 065 | 0.271201 | 0.559872 | 0.803183 |
| 0 | 066 | 0.282906 | 0.429978 | 0.292810 |
| 0 | 067 | 0.263281 | 0.928282 | 0.792174 |
| 0 | 068 | 0.765802 | 0.937050 | 0.714590 |
| 0 | 069 | 0.781456 | 0.448208 | 0.211154 |
| 0 | 070 | 0.767400 | 0.556790 | 0.736455 |
| 0 | 071 | 0.777592 | 0.055944 | 0.232745 |
| 0 | 072 | 0.313204 | 0.124172 | 0.613730 |
| 0 | 073 | 0.236179 | 0.621766 | 0.116765 |
| 0 | 074 | 0.325335 | 0.374577 | 0.613541 |
| 0 | 075 | 0.221970 | 0.871523 | 0.108997 |
| 0 | 076 | 0.724762 | 0.868417 | 0.382188 |
| 0 | 077 | 0.815178 | 0.360894 | 0.886200 |
| 0 | 078 | 0.726319 | 0.626193 | 0.431546 |

|   |      |          |          |          |
|---|------|----------|----------|----------|
| 0 | 079  | 0.821178 | 0.118610 | 0.914351 |
| 0 | 080  | 0.223591 | 0.041117 | 0.539685 |
| 0 | 081  | 0.322640 | 0.536930 | 0.039457 |
| 0 | 082  | 0.224972 | 0.434591 | 0.521369 |
| 0 | 083  | 0.321520 | 0.935859 | 0.021698 |
| 0 | 084  | 0.818440 | 0.941945 | 0.465191 |
| 0 | 085  | 0.729068 | 0.444972 | 0.965260 |
| 0 | 086  | 0.829023 | 0.556357 | 0.500692 |
| 0 | 087  | 0.718249 | 0.058249 | 0.999845 |
| 0 | 088  | 0.322988 | 0.994591 | 0.646415 |
| 0 | 089  | 0.221742 | 0.491638 | 0.143932 |
| 0 | 090  | 0.306377 | 0.504349 | 0.632373 |
| 0 | 091  | 0.237461 | 0.000775 | 0.135916 |
| 0 | 092  | 0.714631 | 0.000080 | 0.383454 |
| 0 | 093  | 0.835427 | 0.491228 | 0.874039 |
| 0 | 094  | 0.741949 | 0.501513 | 0.380085 |
| 0 | 095  | 0.798860 | 0.990815 | 0.886245 |
| 0 | 096  | 0.135332 | 0.127164 | 0.608679 |
| 0 | 097  | 0.407511 | 0.625619 | 0.109989 |
| 0 | 098  | 0.132822 | 0.361046 | 0.605435 |
| 0 | 099  | 0.413804 | 0.860610 | 0.102886 |
| 0 | 0100 | 0.910833 | 0.857378 | 0.404412 |
| 0 | 0101 | 0.638850 | 0.359447 | 0.900097 |
| 0 | 0102 | 0.919604 | 0.628908 | 0.408036 |
| 0 | 0103 | 0.623672 | 0.128214 | 0.913714 |
| 0 | 0104 | 0.110895 | 0.060085 | 0.444676 |
| 0 | 0105 | 0.434523 | 0.560553 | 0.944844 |
| 0 | 0106 | 0.102003 | 0.438192 | 0.454702 |
| 0 | 0107 | 0.444626 | 0.940966 | 0.955737 |
| 0 | 0108 | 0.924469 | 0.919831 | 0.575474 |
| 0 | 0109 | 0.621844 | 0.418743 | 0.072618 |
| 0 | 0110 | 0.952253 | 0.550023 | 0.558236 |
| 0 | 0111 | 0.595655 | 0.047283 | 0.062531 |
| 0 | 0112 | 0.149391 | 0.056557 | 0.255688 |
| 0 | 0113 | 0.396810 | 0.551972 | 0.755570 |
| 0 | 0114 | 0.152676 | 0.423637 | 0.274671 |
| 0 | 0115 | 0.393589 | 0.927105 | 0.775957 |
| 0 | 0116 | 0.891529 | 0.952040 | 0.761195 |
| 0 | 0117 | 0.655296 | 0.449244 | 0.258137 |
| 0 | 0118 | 0.897658 | 0.561924 | 0.737503 |
| 0 | 0119 | 0.647734 | 0.062312 | 0.242525 |
| 0 | 0120 | 0.112298 | 0.945892 | 0.346266 |
| 0 | 0121 | 0.437862 | 0.444806 | 0.851142 |
| 0 | 0122 | 0.119750 | 0.543691 | 0.339268 |

|   |      |          |          |          |
|---|------|----------|----------|----------|
| 0 | 0123 | 0.431758 | 0.045942 | 0.837515 |
| 0 | 0124 | 0.946888 | 0.040974 | 0.642647 |
| 0 | 0125 | 0.598418 | 0.539302 | 0.139400 |
| 0 | 0126 | 0.935658 | 0.443644 | 0.672738 |
| 0 | 0127 | 0.612924 | 0.942405 | 0.180307 |
| 0 | 0128 | 0.230368 | 0.131951 | 0.156141 |
| 0 | 0129 | 0.320983 | 0.634134 | 0.659080 |
| 0 | 0130 | 0.229292 | 0.358420 | 0.152290 |
| 0 | 0131 | 0.320849 | 0.861288 | 0.649815 |
| 0 | 0132 | 0.819587 | 0.863403 | 0.855056 |
| 0 | 0133 | 0.736604 | 0.370724 | 0.354754 |
| 0 | 0134 | 0.829508 | 0.624375 | 0.873806 |
| 0 | 0135 | 0.718632 | 0.131663 | 0.367269 |
| 0 | 0136 | 0.521514 | 0.850606 | 0.214974 |
| 0 | 0137 | 0.026296 | 0.353282 | 0.720403 |
| 0 | 0138 | 0.519840 | 0.633505 | 0.210923 |
| 0 | 0139 | 0.024887 | 0.135832 | 0.714661 |
| 0 | 0140 | 0.522712 | 0.136152 | 0.788207 |
| 0 | 0141 | 0.026734 | 0.632434 | 0.294821 |
| 0 | 0142 | 0.527721 | 0.355850 | 0.794991 |
| 0 | 0143 | 0.020714 | 0.857522 | 0.295541 |
| 0 | 0144 | 0.404981 | 0.832566 | 0.294831 |
| 0 | 0145 | 0.143404 | 0.333026 | 0.797087 |
| 0 | 0146 | 0.408093 | 0.657473 | 0.301740 |
| 0 | 0147 | 0.138944 | 0.156124 | 0.801370 |
| 0 | 0148 | 0.642153 | 0.149909 | 0.720723 |
| 0 | 0149 | 0.914091 | 0.653055 | 0.212171 |
| 0 | 0150 | 0.641296 | 0.330957 | 0.707447 |
| 0 | 0151 | 0.906626 | 0.831558 | 0.211376 |
| 0 | 0152 | 0.451615 | 0.743080 | 0.166848 |
| 0 | 0153 | 0.093932 | 0.244357 | 0.670841 |
| 0 | 0154 | 0.592334 | 0.244178 | 0.837219 |
| 0 | 0155 | 0.959748 | 0.743974 | 0.337756 |
| 0 | 0156 | 0.337304 | 0.849504 | 0.457484 |
| 0 | 0157 | 0.210450 | 0.349969 | 0.960116 |
| 0 | 0158 | 0.338930 | 0.638282 | 0.464549 |
| 0 | 0159 | 0.210201 | 0.137033 | 0.962331 |
| 0 | 0160 | 0.712350 | 0.161492 | 0.560193 |
| 0 | 0161 | 0.835798 | 0.662141 | 0.061274 |
| 0 | 0162 | 0.712347 | 0.353411 | 0.546144 |
| 0 | 0163 | 0.836504 | 0.845764 | 0.048186 |
| 0 | 0164 | 0.274220 | 0.841277 | 0.285487 |
| 0 | 0165 | 0.274156 | 0.340353 | 0.789112 |
| 0 | 0166 | 0.277296 | 0.662734 | 0.295713 |

|    |       |          |          |          |
|----|-------|----------|----------|----------|
| O  | O167  | 0.269660 | 0.162876 | 0.792067 |
| O  | O168  | 0.771885 | 0.139110 | 0.733408 |
| O  | O169  | 0.787163 | 0.632183 | 0.239048 |
| O  | O170  | 0.771956 | 0.316770 | 0.711099 |
| O  | O171  | 0.776508 | 0.816542 | 0.216593 |
| O  | O172  | 0.301444 | 0.745702 | 0.565191 |
| O  | O173  | 0.248078 | 0.244071 | 0.062951 |
| O  | O174  | 0.747716 | 0.251696 | 0.428821 |
| O  | O175  | 0.798403 | 0.746608 | 0.925446 |
| O  | O176  | 0.217097 | 0.844382 | 0.530871 |
| O  | O177  | 0.331481 | 0.343005 | 0.029091 |
| O  | O178  | 0.218539 | 0.644224 | 0.538327 |
| O  | O179  | 0.331451 | 0.143051 | 0.032620 |
| O  | O180  | 0.827505 | 0.150024 | 0.472455 |
| O  | O181  | 0.719048 | 0.647088 | 0.975514 |
| O  | O182  | 0.834584 | 0.345077 | 0.480064 |
| O  | O183  | 0.716273 | 0.844708 | 0.975593 |
| O  | O184  | 0.136907 | 0.744293 | 0.580678 |
| O  | O185  | 0.411322 | 0.242996 | 0.081519 |
| O  | O186  | 0.914455 | 0.245411 | 0.427046 |
| O  | O187  | 0.635310 | 0.745302 | 0.927052 |
| O  | O188  | 0.100628 | 0.832972 | 0.445410 |
| O  | O189  | 0.448865 | 0.330873 | 0.946422 |
| O  | O190  | 0.106591 | 0.656095 | 0.442223 |
| O  | O191  | 0.445150 | 0.157605 | 0.940682 |
| O  | O192  | 0.938593 | 0.162202 | 0.572597 |
| O  | O193  | 0.603886 | 0.660318 | 0.067177 |
| O  | O194  | 0.951264 | 0.334003 | 0.563886 |
| O  | O195  | 0.598461 | 0.838563 | 0.058216 |
| O  | O196  | 0.145932 | 0.832438 | 0.259326 |
| O  | O197  | 0.402299 | 0.333020 | 0.760913 |
| O  | O198  | 0.150351 | 0.658382 | 0.255782 |
| O  | O199  | 0.397443 | 0.159930 | 0.756057 |
| O  | O200  | 0.899984 | 0.136789 | 0.759252 |
| O  | O201  | 0.645794 | 0.636878 | 0.252479 |
| O  | O202  | 0.900395 | 0.326832 | 0.744960 |
| O  | O203  | 0.647072 | 0.821909 | 0.239025 |
| O  | O204  | 0.225300 | 0.747578 | 0.167919 |
| O  | O205  | 0.323019 | 0.249302 | 0.667621 |
| O  | O206  | 0.830117 | 0.235915 | 0.836551 |
| O  | O207  | 0.717571 | 0.740499 | 0.349913 |
| Al | Al208 | 0.719819 | 0.655469 | 0.305241 |
| Si | Si209 | 0.446674 | 0.052403 | 0.193942 |
| Si | Si210 | 0.100283 | 0.552902 | 0.693144 |

|    |       |          |          |          |
|----|-------|----------|----------|----------|
| Si | Si211 | 0.453948 | 0.435076 | 0.190261 |
| Si | Si212 | 0.093051 | 0.935850 | 0.690233 |
| Si | Si213 | 0.597526 | 0.939139 | 0.817933 |
| Si | Si214 | 0.950249 | 0.438567 | 0.318155 |
| Si | Si215 | 0.596361 | 0.548600 | 0.829323 |
| Si | Si216 | 0.950060 | 0.047675 | 0.330401 |
| Si | Si217 | 0.342326 | 0.027201 | 0.349331 |
| Si | Si218 | 0.204769 | 0.527498 | 0.849496 |
| Si | Si219 | 0.345077 | 0.467993 | 0.342297 |
| Si | Si220 | 0.201942 | 0.967750 | 0.841728 |
| Si | Si221 | 0.701140 | 0.963597 | 0.656523 |
| Si | Si222 | 0.849585 | 0.464386 | 0.153248 |
| Si | Si223 | 0.708687 | 0.516034 | 0.682980 |
| Si | Si224 | 0.837640 | 0.016704 | 0.179732 |
| Si | Si225 | 0.300766 | 0.050818 | 0.567100 |
| Si | Si226 | 0.245829 | 0.548817 | 0.067382 |
| Si | Si227 | 0.300969 | 0.441558 | 0.557528 |
| Si | Si228 | 0.245213 | 0.940473 | 0.057263 |
| Si | Si229 | 0.740332 | 0.935585 | 0.443699 |
| Si | Si230 | 0.806388 | 0.431474 | 0.942359 |
| Si | Si231 | 0.751845 | 0.553381 | 0.470011 |
| Si | Si232 | 0.794638 | 0.050848 | 0.965790 |
| Si | Si233 | 0.145754 | 0.056231 | 0.552609 |
| Si | Si234 | 0.399943 | 0.554714 | 0.052929 |
| Si | Si235 | 0.147977 | 0.431988 | 0.552517 |
| Si | Si236 | 0.398447 | 0.932476 | 0.052888 |
| Si | Si237 | 0.896667 | 0.926721 | 0.463035 |
| Si | Si238 | 0.651114 | 0.428137 | 0.961454 |
| Si | Si239 | 0.904771 | 0.558244 | 0.462130 |
| Si | Si240 | 0.641744 | 0.057599 | 0.965604 |
| Si | Si241 | 0.099634 | 0.025679 | 0.336753 |
| Si | Si242 | 0.447253 | 0.524754 | 0.838372 |
| Si | Si243 | 0.100288 | 0.465015 | 0.340816 |
| Si | Si244 | 0.447476 | 0.966651 | 0.841471 |
| Si | Si245 | 0.944528 | 0.962678 | 0.673524 |
| Si | Si246 | 0.601989 | 0.461504 | 0.171191 |
| Si | Si247 | 0.952270 | 0.522978 | 0.672384 |
| Si | Si248 | 0.594763 | 0.021489 | 0.177033 |
| Si | Si249 | 0.223158 | 0.061165 | 0.212675 |
| Si | Si250 | 0.323660 | 0.561834 | 0.712635 |
| Si | Si251 | 0.221878 | 0.426589 | 0.215537 |
| Si | Si252 | 0.324896 | 0.928521 | 0.715705 |
| Si | Si253 | 0.819111 | 0.936160 | 0.803674 |
| Si | Si254 | 0.728983 | 0.442380 | 0.300570 |

|    |       |          |          |          |
|----|-------|----------|----------|----------|
| Si | Si255 | 0.832526 | 0.558007 | 0.806249 |
| Si | Si256 | 0.714951 | 0.062165 | 0.306472 |
| Si | Si257 | 0.448177 | 0.821389 | 0.194851 |
| Si | Si258 | 0.098842 | 0.322746 | 0.698466 |
| Si | Si259 | 0.447501 | 0.664938 | 0.197047 |
| Si | Si260 | 0.098015 | 0.166005 | 0.698683 |
| Si | Si261 | 0.595217 | 0.164952 | 0.814975 |
| Si | Si262 | 0.954810 | 0.664899 | 0.313190 |
| Si | Si263 | 0.599754 | 0.322455 | 0.810191 |
| Si | Si264 | 0.949708 | 0.822157 | 0.312269 |
| Si | Si265 | 0.339982 | 0.867725 | 0.340809 |
| Si | Si266 | 0.208423 | 0.367871 | 0.843305 |
| Si | Si267 | 0.340521 | 0.626346 | 0.345645 |
| Si | Si268 | 0.207428 | 0.125733 | 0.843444 |
| Si | Si269 | 0.707804 | 0.123594 | 0.665959 |
| Si | Si270 | 0.847257 | 0.622421 | 0.164578 |
| Si | Si271 | 0.710881 | 0.359378 | 0.666166 |
| Si | Si272 | 0.837197 | 0.857937 | 0.167014 |
| Si | Si273 | 0.293761 | 0.825009 | 0.551015 |
| Si | Si274 | 0.255083 | 0.323666 | 0.051437 |
| Si | Si275 | 0.294810 | 0.665966 | 0.556139 |
| Si | Si276 | 0.255231 | 0.164455 | 0.053094 |
| Si | Si277 | 0.751550 | 0.173532 | 0.457074 |
| Si | Si278 | 0.795479 | 0.669327 | 0.959117 |
| Si | Si279 | 0.757790 | 0.329979 | 0.452950 |
| Si | Si280 | 0.792640 | 0.824742 | 0.952080 |
| Si | Si281 | 0.140893 | 0.821926 | 0.548121 |
| Si | Si282 | 0.407464 | 0.320601 | 0.048389 |
| Si | Si283 | 0.141872 | 0.666617 | 0.548594 |
| Si | Si284 | 0.407894 | 0.165873 | 0.046307 |
| Si | Si285 | 0.905136 | 0.168830 | 0.463514 |
| Si | Si286 | 0.642011 | 0.668063 | 0.962501 |
| Si | Si287 | 0.910855 | 0.322969 | 0.461421 |
| Si | Si288 | 0.639751 | 0.823361 | 0.957578 |
| Si | Si289 | 0.095189 | 0.867161 | 0.336262 |
| Si | Si290 | 0.453914 | 0.366138 | 0.838008 |
| Si | Si291 | 0.101190 | 0.622377 | 0.333187 |
| Si | Si292 | 0.449015 | 0.124783 | 0.830681 |
| Si | Si293 | 0.952163 | 0.119159 | 0.672628 |
| Si | Si294 | 0.593420 | 0.617908 | 0.169563 |
| Si | Si295 | 0.953234 | 0.364686 | 0.675421 |
| Si | Si296 | 0.594884 | 0.863577 | 0.172598 |
| Si | Si297 | 0.216904 | 0.823869 | 0.205731 |
| Si | Si298 | 0.331120 | 0.325093 | 0.707954 |



|    |       |          |          |          |
|----|-------|----------|----------|----------|
| Si | Si299 | 0.222411 | 0.671598 | 0.208848 |
| Si | Si300 | 0.325810 | 0.173071 | 0.707382 |
| Si | Si301 | 0.830716 | 0.157432 | 0.809880 |
| Si | Si302 | 0.829629 | 0.311303 | 0.794602 |
| Si | Si303 | 0.716564 | 0.813481 | 0.296014 |
| Zn | Zn304 | 0.695987 | 0.713365 | 0.492229 |

**M-C<sub>4</sub>H<sub>9</sub>Zn-ZnH<sup>+</sup> (Fig. 6/M2)** Total energy = -1925.44771910 eV

data\_

\_audit\_creation\_method 'Materials Studio'

\_cell\_length\_a 20.357621

\_cell\_length\_b 20.050598

\_cell\_length\_c 13.476578

\_cell\_angle\_alpha 90.000000

\_cell\_angle\_beta 90.000000

\_cell\_angle\_gamma 90.000000

\_symmetry\_space\_group\_name\_H-M 'P1'

loop\_

\_atom\_site\_type\_symbol

\_atom\_site\_label

\_atom\_site\_fract\_x

\_atom\_site\_fract\_y

\_atom\_site\_fract\_z

|   |     |          |          |          |
|---|-----|----------|----------|----------|
| H | H1  | 0.458361 | 0.796640 | 0.778096 |
| H | H2  | 0.386235 | 0.755837 | 0.736651 |
| H | H3  | 0.424011 | 0.817092 | 0.661547 |
| H | H4  | 0.447561 | 0.696947 | 0.605586 |
| H | H5  | 0.488762 | 0.683949 | 0.718537 |
| H | H6  | 0.565427 | 0.781227 | 0.671050 |
| H | H7  | 0.525248 | 0.783681 | 0.555865 |
| H | H8  | 0.610508 | 0.671252 | 0.643593 |
| H | H9  | 0.554957 | 0.653683 | 0.547295 |
| C | C10 | 0.433683 | 0.775917 | 0.712832 |
| C | C11 | 0.475959 | 0.722334 | 0.663857 |
| C | C12 | 0.539118 | 0.750288 | 0.616944 |
| C | C13 | 0.584018 | 0.693878 | 0.581469 |
| O | O14 | 0.489866 | 0.028609 | 0.212329 |
| O | O15 | 0.992631 | 0.532644 | 0.709725 |
| O | O16 | 0.500867 | 0.432801 | 0.207060 |
| O | O17 | 0.984059 | 0.933773 | 0.707078 |
| O | O18 | 0.489277 | 0.950101 | 0.792546 |
| O | O19 | 0.995343 | 0.452273 | 0.290193 |
| O | O20 | 0.489455 | 0.540271 | 0.791627 |

|   |     |          |          |          |
|---|-----|----------|----------|----------|
| 0 | 021 | 0.995347 | 0.035467 | 0.289644 |
| 0 | 022 | 0.374559 | 0.057258 | 0.289786 |
| 0 | 023 | 0.108944 | 0.556113 | 0.787927 |
| 0 | 024 | 0.381824 | 0.440582 | 0.283877 |
| 0 | 025 | 0.101825 | 0.941437 | 0.786138 |
| 0 | 026 | 0.603083 | 0.938498 | 0.704783 |
| 0 | 027 | 0.881306 | 0.430039 | 0.203996 |
| 0 | 028 | 0.607319 | 0.527164 | 0.718161 |
| 0 | 029 | 0.874093 | 0.033760 | 0.225839 |
| 0 | 030 | 0.412007 | 0.116118 | 0.122416 |
| 0 | 031 | 0.073867 | 0.617413 | 0.622001 |
| 0 | 032 | 0.405825 | 0.360896 | 0.130678 |
| 0 | 033 | 0.080291 | 0.861122 | 0.633126 |
| 0 | 034 | 0.576956 | 0.863235 | 0.860411 |
| 0 | 035 | 0.913067 | 0.362907 | 0.365047 |
| 0 | 036 | 0.585277 | 0.616577 | 0.859208 |
| 0 | 037 | 0.909079 | 0.114658 | 0.375116 |
| 0 | 038 | 0.380225 | 0.987765 | 0.123574 |
| 0 | 039 | 0.100667 | 0.487874 | 0.620087 |
| 0 | 040 | 0.406179 | 0.491939 | 0.104771 |
| 0 | 041 | 0.079762 | 0.991963 | 0.605838 |
| 0 | 042 | 0.598856 | 0.993066 | 0.882778 |
| 0 | 043 | 0.883990 | 0.492123 | 0.377300 |
| 0 | 044 | 0.582033 | 0.486368 | 0.902689 |
| 0 | 045 | 0.903623 | 0.983490 | 0.403430 |
| 0 | 046 | 0.312816 | 0.041165 | 0.460720 |
| 0 | 047 | 0.171895 | 0.542526 | 0.958173 |
| 0 | 048 | 0.315464 | 0.449305 | 0.451411 |
| 0 | 049 | 0.168748 | 0.950696 | 0.952312 |
| 0 | 050 | 0.670764 | 0.923518 | 0.542122 |
| 0 | 051 | 0.816176 | 0.422025 | 0.035812 |
| 0 | 052 | 0.677242 | 0.526777 | 0.555561 |
| 0 | 053 | 0.807494 | 0.030945 | 0.058543 |
| 0 | 054 | 0.313765 | 0.943935 | 0.325292 |
| 0 | 055 | 0.173084 | 0.444816 | 0.822879 |
| 0 | 056 | 0.304899 | 0.545301 | 0.315130 |
| 0 | 057 | 0.181860 | 0.044309 | 0.811999 |
| 0 | 058 | 0.674825 | 0.039452 | 0.635475 |
| 0 | 059 | 0.826110 | 0.538177 | 0.127110 |
| 0 | 060 | 0.693845 | 0.429843 | 0.687645 |
| 0 | 061 | 0.793948 | 0.931470 | 0.187389 |
| 0 | 062 | 0.243677 | 0.053579 | 0.296708 |
| 0 | 063 | 0.240073 | 0.556189 | 0.793331 |
| 0 | 064 | 0.251439 | 0.428347 | 0.283225 |

|   |      |          |          |          |
|---|------|----------|----------|----------|
| 0 | 065  | 0.231733 | 0.925442 | 0.783648 |
| 0 | 066  | 0.734413 | 0.933128 | 0.710613 |
| 0 | 067  | 0.750562 | 0.441445 | 0.201210 |
| 0 | 068  | 0.735122 | 0.551385 | 0.728299 |
| 0 | 069  | 0.745580 | 0.050674 | 0.229181 |
| 0 | 070  | 0.280054 | 0.122564 | 0.606852 |
| 0 | 071  | 0.208419 | 0.619661 | 0.107645 |
| 0 | 072  | 0.295050 | 0.371818 | 0.605511 |
| 0 | 073  | 0.187255 | 0.869521 | 0.103385 |
| 0 | 074  | 0.695582 | 0.860205 | 0.378597 |
| 0 | 075  | 0.781787 | 0.355970 | 0.875453 |
| 0 | 076  | 0.689961 | 0.616513 | 0.415317 |
| 0 | 077  | 0.793304 | 0.114133 | 0.909640 |
| 0 | 078  | 0.191997 | 0.037475 | 0.533659 |
| 0 | 079  | 0.292149 | 0.531800 | 0.032513 |
| 0 | 080  | 0.193586 | 0.429680 | 0.512627 |
| 0 | 081  | 0.289657 | 0.928521 | 0.014008 |
| 0 | 082  | 0.787595 | 0.938053 | 0.456328 |
| 0 | 083  | 0.697833 | 0.440818 | 0.957421 |
| 0 | 084  | 0.796699 | 0.555243 | 0.490382 |
| 0 | 085  | 0.687722 | 0.056294 | 0.992460 |
| 0 | 086  | 0.292547 | 0.993680 | 0.640631 |
| 0 | 087  | 0.189030 | 0.490123 | 0.135510 |
| 0 | 088  | 0.273943 | 0.501443 | 0.621662 |
| 0 | 089  | 0.208788 | 0.998397 | 0.126045 |
| 0 | 090  | 0.680769 | 0.991102 | 0.375231 |
| 0 | 091  | 0.804205 | 0.486065 | 0.865402 |
| 0 | 092  | 0.714703 | 0.490407 | 0.374680 |
| 0 | 093  | 0.768456 | 0.986480 | 0.882078 |
| 0 | 094  | 0.102599 | 0.122651 | 0.601786 |
| 0 | 095  | 0.376614 | 0.621412 | 0.102985 |
| 0 | 096  | 0.101731 | 0.356066 | 0.597173 |
| 0 | 097  | 0.384169 | 0.856390 | 0.094626 |
| 0 | 098  | 0.879947 | 0.852554 | 0.397337 |
| 0 | 099  | 0.607829 | 0.355865 | 0.890715 |
| 0 | 0100 | 0.889784 | 0.623921 | 0.397749 |
| 0 | 0101 | 0.592544 | 0.124597 | 0.905034 |
| 0 | 0102 | 0.080490 | 0.056965 | 0.435622 |
| 0 | 0103 | 0.402489 | 0.558603 | 0.935574 |
| 0 | 0104 | 0.070460 | 0.433312 | 0.446936 |
| 0 | 0105 | 0.412983 | 0.937966 | 0.948854 |
| 0 | 0106 | 0.892040 | 0.914617 | 0.569371 |
| 0 | 0107 | 0.590990 | 0.413328 | 0.065112 |
| 0 | 0108 | 0.919794 | 0.546168 | 0.549491 |

|   |      |          |          |          |
|---|------|----------|----------|----------|
| 0 | 0109 | 0.565022 | 0.045711 | 0.055631 |
| 0 | 0110 | 0.118452 | 0.049796 | 0.246480 |
| 0 | 0111 | 0.365873 | 0.542826 | 0.746860 |
| 0 | 0112 | 0.121004 | 0.421049 | 0.266243 |
| 0 | 0113 | 0.362347 | 0.924460 | 0.768883 |
| 0 | 0114 | 0.860487 | 0.949970 | 0.754247 |
| 0 | 0115 | 0.624779 | 0.446324 | 0.249867 |
| 0 | 0116 | 0.865777 | 0.557454 | 0.729249 |
| 0 | 0117 | 0.615330 | 0.056816 | 0.237087 |
| 0 | 0118 | 0.081517 | 0.941003 | 0.342091 |
| 0 | 0119 | 0.410693 | 0.440666 | 0.849700 |
| 0 | 0120 | 0.089130 | 0.540168 | 0.335399 |
| 0 | 0121 | 0.399896 | 0.043088 | 0.831421 |
| 0 | 0122 | 0.917022 | 0.036362 | 0.632999 |
| 0 | 0123 | 0.567048 | 0.534361 | 0.129474 |
| 0 | 0124 | 0.903942 | 0.439560 | 0.663232 |
| 0 | 0125 | 0.581771 | 0.938226 | 0.167536 |
| 0 | 0126 | 0.198105 | 0.128685 | 0.150218 |
| 0 | 0127 | 0.294230 | 0.629787 | 0.651838 |
| 0 | 0128 | 0.197952 | 0.356863 | 0.143147 |
| 0 | 0129 | 0.289891 | 0.860671 | 0.639950 |
| 0 | 0130 | 0.790769 | 0.859528 | 0.848367 |
| 0 | 0131 | 0.703254 | 0.361877 | 0.341466 |
| 0 | 0132 | 0.796738 | 0.619114 | 0.865504 |
| 0 | 0133 | 0.685583 | 0.122959 | 0.366535 |
| 0 | 0134 | 0.491916 | 0.845692 | 0.206517 |
| 0 | 0135 | 0.994302 | 0.349142 | 0.710506 |
| 0 | 0136 | 0.490341 | 0.629982 | 0.201122 |
| 0 | 0137 | 0.992596 | 0.132073 | 0.708785 |
| 0 | 0138 | 0.490305 | 0.133673 | 0.781757 |
| 0 | 0139 | 0.998307 | 0.630151 | 0.287986 |
| 0 | 0140 | 0.496478 | 0.350025 | 0.786701 |
| 0 | 0141 | 0.990379 | 0.852454 | 0.289845 |
| 0 | 0142 | 0.375422 | 0.829896 | 0.286912 |
| 0 | 0143 | 0.111091 | 0.330185 | 0.789454 |
| 0 | 0144 | 0.379408 | 0.652873 | 0.294833 |
| 0 | 0145 | 0.106897 | 0.151744 | 0.794652 |
| 0 | 0146 | 0.608681 | 0.142216 | 0.710656 |
| 0 | 0147 | 0.886691 | 0.644950 | 0.200953 |
| 0 | 0148 | 0.610236 | 0.328241 | 0.697528 |
| 0 | 0149 | 0.876722 | 0.829322 | 0.203289 |
| 0 | 0150 | 0.420695 | 0.738991 | 0.159333 |
| 0 | 0151 | 0.062341 | 0.240090 | 0.664230 |
| 0 | 0152 | 0.563845 | 0.239958 | 0.826575 |

|   |      |          |          |          |
|---|------|----------|----------|----------|
| 0 | 0153 | 0.927147 | 0.739196 | 0.327123 |
| 0 | 0154 | 0.306618 | 0.842058 | 0.448741 |
| 0 | 0155 | 0.179195 | 0.345513 | 0.951673 |
| 0 | 0156 | 0.308987 | 0.638157 | 0.457032 |
| 0 | 0157 | 0.178284 | 0.134865 | 0.955991 |
| 0 | 0158 | 0.684528 | 0.159288 | 0.556973 |
| 0 | 0159 | 0.806441 | 0.657690 | 0.052555 |
| 0 | 0160 | 0.680961 | 0.345418 | 0.534806 |
| 0 | 0161 | 0.805074 | 0.840742 | 0.041548 |
| 0 | 0162 | 0.244852 | 0.838458 | 0.275126 |
| 0 | 0163 | 0.241859 | 0.338152 | 0.779776 |
| 0 | 0164 | 0.248721 | 0.661980 | 0.286742 |
| 0 | 0165 | 0.237398 | 0.161812 | 0.785544 |
| 0 | 0166 | 0.737580 | 0.133124 | 0.733963 |
| 0 | 0167 | 0.759928 | 0.628020 | 0.232015 |
| 0 | 0168 | 0.740395 | 0.308349 | 0.700800 |
| 0 | 0169 | 0.747149 | 0.810041 | 0.211283 |
| 0 | 0170 | 0.270574 | 0.742572 | 0.564441 |
| 0 | 0171 | 0.216279 | 0.241117 | 0.058301 |
| 0 | 0172 | 0.717602 | 0.244413 | 0.417457 |
| 0 | 0173 | 0.769090 | 0.742094 | 0.916415 |
| 0 | 0174 | 0.186276 | 0.840056 | 0.522363 |
| 0 | 0175 | 0.300378 | 0.338765 | 0.020794 |
| 0 | 0176 | 0.189468 | 0.640069 | 0.535318 |
| 0 | 0177 | 0.299323 | 0.139860 | 0.026973 |
| 0 | 0178 | 0.797467 | 0.143710 | 0.463625 |
| 0 | 0179 | 0.688208 | 0.645034 | 0.971143 |
| 0 | 0180 | 0.802676 | 0.340036 | 0.466808 |
| 0 | 0181 | 0.685868 | 0.839581 | 0.965130 |
| 0 | 0182 | 0.107249 | 0.740035 | 0.576498 |
| 0 | 0183 | 0.379799 | 0.239103 | 0.076785 |
| 0 | 0184 | 0.883413 | 0.240454 | 0.417727 |
| 0 | 0185 | 0.604381 | 0.740951 | 0.914191 |
| 0 | 0186 | 0.068448 | 0.828513 | 0.441904 |
| 0 | 0187 | 0.418148 | 0.325036 | 0.939670 |
| 0 | 0188 | 0.079923 | 0.654774 | 0.433431 |
| 0 | 0189 | 0.412622 | 0.154901 | 0.934094 |
| 0 | 0190 | 0.908273 | 0.158063 | 0.564113 |
| 0 | 0191 | 0.567971 | 0.652956 | 0.048251 |
| 0 | 0192 | 0.918505 | 0.329747 | 0.554402 |
| 0 | 0193 | 0.569036 | 0.831716 | 0.050094 |
| 0 | 0194 | 0.116024 | 0.827206 | 0.257176 |
| 0 | 0195 | 0.370361 | 0.331692 | 0.755190 |
| 0 | 0196 | 0.121893 | 0.652673 | 0.246657 |

|    |       |          |          |          |
|----|-------|----------|----------|----------|
| O  | O197  | 0.365101 | 0.156580 | 0.749302 |
| O  | O198  | 0.866737 | 0.130693 | 0.748420 |
| O  | O199  | 0.618163 | 0.635865 | 0.230025 |
| O  | O200  | 0.868466 | 0.322916 | 0.735831 |
| O  | O201  | 0.617700 | 0.819629 | 0.231687 |
| O  | O202  | 0.194042 | 0.744860 | 0.159258 |
| O  | O203  | 0.292370 | 0.247051 | 0.660689 |
| O  | O204  | 0.800350 | 0.230990 | 0.828859 |
| O  | O205  | 0.684742 | 0.734020 | 0.341323 |
| Al | Al206 | 0.689854 | 0.649651 | 0.292896 |
| Si | Si207 | 0.414428 | 0.047625 | 0.186277 |
| Si | Si208 | 0.068860 | 0.548399 | 0.684287 |
| Si | Si209 | 0.423180 | 0.431903 | 0.181561 |
| Si | Si210 | 0.061973 | 0.932279 | 0.682747 |
| Si | Si211 | 0.566566 | 0.936398 | 0.811576 |
| Si | Si212 | 0.918724 | 0.434588 | 0.309879 |
| Si | Si213 | 0.566698 | 0.542630 | 0.819130 |
| Si | Si214 | 0.919566 | 0.042205 | 0.323882 |
| Si | Si215 | 0.311086 | 0.023745 | 0.343421 |
| Si | Si216 | 0.173570 | 0.524720 | 0.840980 |
| Si | Si217 | 0.313578 | 0.465709 | 0.333662 |
| Si | Si218 | 0.171007 | 0.965350 | 0.834146 |
| Si | Si219 | 0.670720 | 0.959336 | 0.649865 |
| Si | Si220 | 0.818465 | 0.458619 | 0.143239 |
| Si | Si221 | 0.678577 | 0.508795 | 0.672304 |
| Si | Si222 | 0.805366 | 0.011607 | 0.175117 |
| Si | Si223 | 0.269023 | 0.048898 | 0.560613 |
| Si | Si224 | 0.215447 | 0.546248 | 0.058825 |
| Si | Si225 | 0.269561 | 0.437830 | 0.548283 |
| Si | Si226 | 0.213593 | 0.936574 | 0.049495 |
| Si | Si227 | 0.709421 | 0.928807 | 0.437448 |
| Si | Si228 | 0.774848 | 0.426202 | 0.933189 |
| Si | Si229 | 0.719742 | 0.547453 | 0.458739 |
| Si | Si230 | 0.764336 | 0.047217 | 0.960569 |
| Si | Si231 | 0.113944 | 0.052314 | 0.544585 |
| Si | Si232 | 0.369307 | 0.551017 | 0.044443 |
| Si | Si233 | 0.116680 | 0.427121 | 0.544488 |
| Si | Si234 | 0.366617 | 0.927908 | 0.045435 |
| Si | Si235 | 0.865734 | 0.921894 | 0.456113 |
| Si | Si236 | 0.619882 | 0.423848 | 0.953846 |
| Si | Si237 | 0.872577 | 0.554250 | 0.452944 |
| Si | Si238 | 0.611185 | 0.054821 | 0.958583 |
| Si | Si239 | 0.068882 | 0.020592 | 0.329145 |
| Si | Si240 | 0.417212 | 0.520393 | 0.831516 |

|    |       |          |          |          |
|----|-------|----------|----------|----------|
| Si | Si241 | 0.068832 | 0.461710 | 0.333898 |
| Si | Si242 | 0.416099 | 0.963922 | 0.834764 |
| Si | Si243 | 0.913419 | 0.958474 | 0.665884 |
| Si | Si244 | 0.571110 | 0.457010 | 0.162938 |
| Si | Si245 | 0.920409 | 0.518917 | 0.663407 |
| Si | Si246 | 0.563081 | 0.017184 | 0.168570 |
| Si | Si247 | 0.192346 | 0.057018 | 0.204796 |
| Si | Si248 | 0.293402 | 0.556900 | 0.703883 |
| Si | Si249 | 0.190027 | 0.424784 | 0.206686 |
| Si | Si250 | 0.293853 | 0.926737 | 0.708046 |
| Si | Si251 | 0.788772 | 0.932740 | 0.798300 |
| Si | Si252 | 0.698388 | 0.435180 | 0.291107 |
| Si | Si253 | 0.800495 | 0.552862 | 0.797707 |
| Si | Si254 | 0.682189 | 0.055154 | 0.301867 |
| Si | Si255 | 0.418197 | 0.817374 | 0.186905 |
| Si | Si256 | 0.067078 | 0.318681 | 0.690477 |
| Si | Si257 | 0.417520 | 0.660767 | 0.189067 |
| Si | Si258 | 0.065894 | 0.161756 | 0.692097 |
| Si | Si259 | 0.563795 | 0.160568 | 0.806010 |
| Si | Si260 | 0.925074 | 0.659888 | 0.303345 |
| Si | Si261 | 0.569379 | 0.318468 | 0.800563 |
| Si | Si262 | 0.918850 | 0.817862 | 0.304595 |
| Si | Si263 | 0.309874 | 0.863635 | 0.333435 |
| Si | Si264 | 0.176361 | 0.364745 | 0.835414 |
| Si | Si265 | 0.310621 | 0.624437 | 0.338596 |
| Si | Si266 | 0.176026 | 0.123253 | 0.837124 |
| Si | Si267 | 0.676682 | 0.118552 | 0.659827 |
| Si | Si268 | 0.818231 | 0.616817 | 0.154914 |
| Si | Si269 | 0.680869 | 0.352856 | 0.654712 |
| Si | Si270 | 0.806143 | 0.853210 | 0.160210 |
| Si | Si271 | 0.262934 | 0.821292 | 0.543990 |
| Si | Si272 | 0.223769 | 0.320448 | 0.043717 |
| Si | Si273 | 0.265626 | 0.662967 | 0.551274 |
| Si | Si274 | 0.223173 | 0.161533 | 0.047428 |
| Si | Si275 | 0.721307 | 0.167291 | 0.450988 |
| Si | Si276 | 0.764921 | 0.665045 | 0.951514 |
| Si | Si277 | 0.726115 | 0.322995 | 0.440684 |
| Si | Si278 | 0.762614 | 0.820058 | 0.943966 |
| Si | Si279 | 0.110430 | 0.817576 | 0.543143 |
| Si | Si280 | 0.376234 | 0.316364 | 0.041597 |
| Si | Si281 | 0.112705 | 0.662792 | 0.542067 |
| Si | Si282 | 0.375897 | 0.162225 | 0.040270 |
| Si | Si283 | 0.874820 | 0.163949 | 0.454890 |
| Si | Si284 | 0.611444 | 0.663481 | 0.948967 |

|    |       |          |          |          |
|----|-------|----------|----------|----------|
| Si | Si285 | 0.879298 | 0.318283 | 0.450977 |
| Si | Si286 | 0.609224 | 0.818504 | 0.947816 |
| Si | Si287 | 0.064378 | 0.862280 | 0.332301 |
| Si | Si288 | 0.423603 | 0.361817 | 0.832343 |
| Si | Si289 | 0.072537 | 0.619139 | 0.326087 |
| Si | Si290 | 0.416757 | 0.121962 | 0.824256 |
| Si | Si291 | 0.920774 | 0.114521 | 0.663980 |
| Si | Si292 | 0.562477 | 0.613742 | 0.154348 |
| Si | Si293 | 0.921175 | 0.360567 | 0.665777 |
| Si | Si294 | 0.564993 | 0.859040 | 0.163320 |
| Si | Si295 | 0.185617 | 0.820671 | 0.199070 |
| Si | Si296 | 0.299888 | 0.322920 | 0.700608 |
| Si | Si297 | 0.193366 | 0.668805 | 0.200041 |
| Si | Si298 | 0.293703 | 0.170932 | 0.700736 |
| Si | Si299 | 0.799551 | 0.152279 | 0.804024 |
| Si | Si300 | 0.797949 | 0.305880 | 0.785041 |
| Si | Si301 | 0.686360 | 0.807668 | 0.289260 |
| Zn | Zn302 | 0.647537 | 0.708416 | 0.475560 |

### TS-C<sub>4</sub>H<sub>9</sub>Zn-HTransfer-Concerted-ZnH<sup>+</sup> (Fig. 6/TS2)

Total energy = -1923.67412690 eV

data\_

\_audit\_creation\_method 'Materials Studio'

\_cell\_length\_a 20.357621

\_cell\_length\_b 20.050598

\_cell\_length\_c 13.476578

\_cell\_angle\_alpha 90.000000

\_cell\_angle\_beta 90.000000

\_cell\_angle\_gamma 90.000000

\_symmetry\_space\_group\_name\_H-M 'P1'

loop\_

\_atom\_site\_type\_symbol

\_atom\_site\_label

\_atom\_site\_fract\_x

\_atom\_site\_fract\_y

\_atom\_site\_fract\_z

|   |    |          |          |          |
|---|----|----------|----------|----------|
| H | H1 | 0.673743 | 0.784755 | 0.623449 |
| H | H2 | 0.672310 | 0.699858 | 0.675012 |
| H | H3 | 0.556941 | 0.687389 | 0.630904 |
| H | H4 | 0.565468 | 0.699477 | 0.482016 |
| H | H5 | 0.566992 | 0.830966 | 0.550281 |
| H | H6 | 0.535056 | 0.810268 | 0.666843 |
| H | H7 | 0.474374 | 0.768022 | 0.467109 |



|   |     |          |          |          |
|---|-----|----------|----------|----------|
| H | H8  | 0.443235 | 0.828034 | 0.551458 |
| H | H9  | 0.444570 | 0.742785 | 0.584897 |
| C | C10 | 0.652302 | 0.735163 | 0.621820 |
| C | C11 | 0.582449 | 0.730798 | 0.601118 |
| C | C12 | 0.540022 | 0.792006 | 0.590033 |
| C | C13 | 0.471663 | 0.781913 | 0.545559 |
| O | O14 | 0.484946 | 0.024685 | 0.205564 |
| O | O15 | 0.991048 | 0.530857 | 0.704621 |
| O | O16 | 0.497565 | 0.431652 | 0.200567 |
| O | O17 | 0.987842 | 0.942152 | 0.702463 |
| O | O18 | 0.496661 | 0.955421 | 0.783190 |
| O | O19 | 0.991747 | 0.452641 | 0.286188 |
| O | O20 | 0.485933 | 0.541823 | 0.788489 |
| O | O21 | 0.994386 | 0.035498 | 0.286005 |
| O | O22 | 0.366234 | 0.053982 | 0.269131 |
| O | O23 | 0.106293 | 0.554948 | 0.786364 |
| O | O24 | 0.378113 | 0.446339 | 0.272781 |
| O | O25 | 0.112788 | 0.943690 | 0.749300 |
| O | O26 | 0.615841 | 0.928708 | 0.720702 |
| O | O27 | 0.877320 | 0.425549 | 0.203544 |
| O | O28 | 0.604672 | 0.527610 | 0.716187 |
| O | O29 | 0.868684 | 0.030334 | 0.242413 |
| O | O30 | 0.411599 | 0.109645 | 0.103893 |
| O | O31 | 0.073544 | 0.616189 | 0.620410 |
| O | O32 | 0.400965 | 0.359058 | 0.128626 |
| O | O33 | 0.068519 | 0.863515 | 0.606215 |
| O | O34 | 0.569127 | 0.867626 | 0.880310 |
| O | O35 | 0.912728 | 0.362233 | 0.366715 |
| O | O36 | 0.581601 | 0.619874 | 0.851254 |
| O | O37 | 0.913059 | 0.114564 | 0.381227 |
| O | O38 | 0.378953 | 0.980940 | 0.108302 |
| O | O39 | 0.101581 | 0.486400 | 0.619530 |
| O | O40 | 0.406315 | 0.489127 | 0.090008 |
| O | O41 | 0.072830 | 0.994447 | 0.576538 |
| O | O42 | 0.601602 | 0.996516 | 0.886298 |
| O | O43 | 0.879503 | 0.490164 | 0.374044 |
| O | O44 | 0.578933 | 0.490497 | 0.902344 |
| O | O45 | 0.911899 | 0.983869 | 0.415544 |
| O | O46 | 0.304310 | 0.057342 | 0.439013 |
| O | O47 | 0.171807 | 0.553546 | 0.954200 |
| O | O48 | 0.310904 | 0.447008 | 0.439373 |
| O | O49 | 0.175018 | 0.940598 | 0.918949 |
| O | O50 | 0.680212 | 0.922281 | 0.553902 |
| O | O51 | 0.812452 | 0.420605 | 0.035347 |

|   |     |          |          |          |
|---|-----|----------|----------|----------|
| 0 | 052 | 0.675552 | 0.527189 | 0.555890 |
| 0 | 053 | 0.807256 | 0.039927 | 0.072582 |
| 0 | 054 | 0.317714 | 0.941551 | 0.345899 |
| 0 | 055 | 0.164481 | 0.443768 | 0.843123 |
| 0 | 056 | 0.298970 | 0.548071 | 0.313885 |
| 0 | 057 | 0.190582 | 0.044745 | 0.800028 |
| 0 | 058 | 0.666258 | 0.039911 | 0.641480 |
| 0 | 059 | 0.824883 | 0.535987 | 0.128992 |
| 0 | 060 | 0.690046 | 0.429129 | 0.685882 |
| 0 | 061 | 0.786975 | 0.933263 | 0.186231 |
| 0 | 062 | 0.236828 | 0.033641 | 0.275514 |
| 0 | 063 | 0.237484 | 0.546787 | 0.786650 |
| 0 | 064 | 0.248399 | 0.430953 | 0.268665 |
| 0 | 065 | 0.242111 | 0.928431 | 0.751600 |
| 0 | 066 | 0.745449 | 0.948410 | 0.717569 |
| 0 | 067 | 0.746770 | 0.440748 | 0.200512 |
| 0 | 068 | 0.733253 | 0.549666 | 0.729305 |
| 0 | 069 | 0.739758 | 0.050396 | 0.239028 |
| 0 | 070 | 0.277355 | 0.128794 | 0.597747 |
| 0 | 071 | 0.208816 | 0.621085 | 0.112818 |
| 0 | 072 | 0.299099 | 0.374176 | 0.597700 |
| 0 | 073 | 0.182876 | 0.863791 | 0.073978 |
| 0 | 074 | 0.702057 | 0.856959 | 0.390244 |
| 0 | 075 | 0.776348 | 0.357557 | 0.872914 |
| 0 | 076 | 0.681830 | 0.613228 | 0.412449 |
| 0 | 077 | 0.798676 | 0.115216 | 0.914950 |
| 0 | 078 | 0.192446 | 0.036741 | 0.536036 |
| 0 | 079 | 0.289007 | 0.530858 | 0.034414 |
| 0 | 080 | 0.191258 | 0.424528 | 0.509406 |
| 0 | 081 | 0.292148 | 0.917316 | 0.996508 |
| 0 | 082 | 0.791040 | 0.944155 | 0.452590 |
| 0 | 083 | 0.695778 | 0.445990 | 0.954907 |
| 0 | 084 | 0.792905 | 0.556804 | 0.483568 |
| 0 | 085 | 0.690236 | 0.061095 | 0.992821 |
| 0 | 086 | 0.305617 | 0.000606 | 0.616222 |
| 0 | 087 | 0.180885 | 0.491439 | 0.125430 |
| 0 | 088 | 0.271163 | 0.502798 | 0.608087 |
| 0 | 089 | 0.207852 | 0.993231 | 0.092736 |
| 0 | 090 | 0.676687 | 0.986478 | 0.383276 |
| 0 | 091 | 0.804692 | 0.486719 | 0.866271 |
| 0 | 092 | 0.709889 | 0.486934 | 0.375503 |
| 0 | 093 | 0.776797 | 0.985241 | 0.900318 |
| 0 | 094 | 0.099249 | 0.124578 | 0.581406 |
| 0 | 095 | 0.375366 | 0.618689 | 0.101897 |

|   |      |          |          |          |
|---|------|----------|----------|----------|
| 0 | 096  | 0.091959 | 0.356435 | 0.584620 |
| 0 | 097  | 0.393526 | 0.851715 | 0.073015 |
| 0 | 098  | 0.882651 | 0.854401 | 0.405964 |
| 0 | 099  | 0.607778 | 0.360726 | 0.885463 |
| 0 | 0100 | 0.891574 | 0.620982 | 0.397076 |
| 0 | 0101 | 0.590553 | 0.127284 | 0.911782 |
| 0 | 0102 | 0.093979 | 0.060213 | 0.409913 |
| 0 | 0103 | 0.394761 | 0.561646 | 0.927404 |
| 0 | 0104 | 0.069756 | 0.441716 | 0.440827 |
| 0 | 0105 | 0.413099 | 0.937498 | 0.929351 |
| 0 | 0106 | 0.887586 | 0.916310 | 0.579778 |
| 0 | 0107 | 0.589553 | 0.414169 | 0.061670 |
| 0 | 0108 | 0.914573 | 0.541139 | 0.548130 |
| 0 | 0109 | 0.568934 | 0.047366 | 0.061417 |
| 0 | 0110 | 0.113693 | 0.031459 | 0.217966 |
| 0 | 0111 | 0.363011 | 0.536992 | 0.738301 |
| 0 | 0112 | 0.117671 | 0.421081 | 0.259821 |
| 0 | 0113 | 0.372965 | 0.926265 | 0.741717 |
| 0 | 0114 | 0.869019 | 0.946831 | 0.771629 |
| 0 | 0115 | 0.620864 | 0.442364 | 0.249277 |
| 0 | 0116 | 0.864261 | 0.558062 | 0.728971 |
| 0 | 0117 | 0.608774 | 0.052250 | 0.249079 |
| 0 | 0118 | 0.075515 | 0.937867 | 0.344006 |
| 0 | 0119 | 0.410262 | 0.441559 | 0.852442 |
| 0 | 0120 | 0.085785 | 0.542834 | 0.316999 |
| 0 | 0121 | 0.401996 | 0.044673 | 0.816409 |
| 0 | 0122 | 0.907141 | 0.038976 | 0.642419 |
| 0 | 0123 | 0.567536 | 0.533908 | 0.131076 |
| 0 | 0124 | 0.900397 | 0.437901 | 0.669435 |
| 0 | 0125 | 0.578836 | 0.936248 | 0.165319 |
| 0 | 0126 | 0.194288 | 0.119320 | 0.139156 |
| 0 | 0127 | 0.290306 | 0.628329 | 0.652984 |
| 0 | 0128 | 0.192209 | 0.358414 | 0.130688 |
| 0 | 0129 | 0.303254 | 0.868012 | 0.603695 |
| 0 | 0130 | 0.787345 | 0.859712 | 0.850277 |
| 0 | 0131 | 0.700779 | 0.358593 | 0.338557 |
| 0 | 0132 | 0.793919 | 0.619549 | 0.865328 |
| 0 | 0133 | 0.678963 | 0.118989 | 0.378694 |
| 0 | 0134 | 0.488405 | 0.844195 | 0.209572 |
| 0 | 0135 | 0.991263 | 0.346078 | 0.710683 |
| 0 | 0136 | 0.488774 | 0.627696 | 0.199957 |
| 0 | 0137 | 0.995208 | 0.128993 | 0.701165 |
| 0 | 0138 | 0.493640 | 0.136088 | 0.778384 |
| 0 | 0139 | 0.996838 | 0.637370 | 0.281707 |

|   |      |          |          |          |
|---|------|----------|----------|----------|
| 0 | 0140 | 0.495047 | 0.351525 | 0.785830 |
| 0 | 0141 | 0.987378 | 0.848029 | 0.286718 |
| 0 | 0142 | 0.365632 | 0.831449 | 0.263606 |
| 0 | 0143 | 0.111667 | 0.330892 | 0.775846 |
| 0 | 0144 | 0.377891 | 0.652577 | 0.292991 |
| 0 | 0145 | 0.112998 | 0.149193 | 0.775513 |
| 0 | 0146 | 0.616000 | 0.149264 | 0.721239 |
| 0 | 0147 | 0.882496 | 0.644731 | 0.201074 |
| 0 | 0148 | 0.607791 | 0.326416 | 0.695243 |
| 0 | 0149 | 0.869506 | 0.832402 | 0.211454 |
| 0 | 0150 | 0.420360 | 0.736483 | 0.154281 |
| 0 | 0151 | 0.060547 | 0.239458 | 0.655387 |
| 0 | 0152 | 0.562402 | 0.243087 | 0.833375 |
| 0 | 0153 | 0.918684 | 0.739212 | 0.330290 |
| 0 | 0154 | 0.292347 | 0.821980 | 0.420467 |
| 0 | 0155 | 0.178207 | 0.330613 | 0.940030 |
| 0 | 0156 | 0.309144 | 0.639960 | 0.458234 |
| 0 | 0157 | 0.176924 | 0.136078 | 0.944992 |
| 0 | 0158 | 0.690407 | 0.159374 | 0.565473 |
| 0 | 0159 | 0.799760 | 0.654634 | 0.054854 |
| 0 | 0160 | 0.678217 | 0.344908 | 0.532094 |
| 0 | 0161 | 0.802213 | 0.840262 | 0.044624 |
| 0 | 0162 | 0.237843 | 0.859702 | 0.250741 |
| 0 | 0163 | 0.240833 | 0.350151 | 0.769382 |
| 0 | 0164 | 0.247533 | 0.666841 | 0.290596 |
| 0 | 0165 | 0.243888 | 0.163150 | 0.783190 |
| 0 | 0166 | 0.744094 | 0.123211 | 0.737327 |
| 0 | 0167 | 0.757114 | 0.623294 | 0.236657 |
| 0 | 0168 | 0.738454 | 0.308621 | 0.697117 |
| 0 | 0169 | 0.739549 | 0.812258 | 0.211196 |
| 0 | 0170 | 0.270155 | 0.742955 | 0.571107 |
| 0 | 0171 | 0.212531 | 0.236742 | 0.065437 |
| 0 | 0172 | 0.715110 | 0.241903 | 0.418754 |
| 0 | 0173 | 0.766432 | 0.741856 | 0.919626 |
| 0 | 0174 | 0.185353 | 0.840358 | 0.529471 |
| 0 | 0175 | 0.297197 | 0.332478 | 0.017255 |
| 0 | 0176 | 0.188387 | 0.641880 | 0.531265 |
| 0 | 0177 | 0.296747 | 0.138967 | 0.020456 |
| 0 | 0178 | 0.796958 | 0.141414 | 0.456618 |
| 0 | 0179 | 0.683592 | 0.644685 | 0.967375 |
| 0 | 0180 | 0.800035 | 0.339012 | 0.463848 |
| 0 | 0181 | 0.683428 | 0.840033 | 0.966318 |
| 0 | 0182 | 0.103945 | 0.739342 | 0.572307 |
| 0 | 0183 | 0.380197 | 0.235669 | 0.072257 |

|    |       |          |          |          |
|----|-------|----------|----------|----------|
| O  | O184  | 0.882161 | 0.240071 | 0.418278 |
| O  | O185  | 0.600839 | 0.742314 | 0.914033 |
| O  | O186  | 0.078387 | 0.817479 | 0.420755 |
| O  | O187  | 0.416110 | 0.324435 | 0.937825 |
| O  | O188  | 0.077185 | 0.650213 | 0.432116 |
| O  | O189  | 0.407098 | 0.156890 | 0.920472 |
| O  | O190  | 0.903620 | 0.159743 | 0.567868 |
| O  | O191  | 0.562019 | 0.649644 | 0.041323 |
| O  | O192  | 0.913896 | 0.329828 | 0.556354 |
| O  | O193  | 0.573167 | 0.822134 | 0.065464 |
| O  | O194  | 0.110550 | 0.834211 | 0.231592 |
| O  | O195  | 0.369183 | 0.334439 | 0.753557 |
| O  | O196  | 0.121010 | 0.660213 | 0.246899 |
| O  | O197  | 0.369761 | 0.158522 | 0.731183 |
| O  | O198  | 0.872528 | 0.140741 | 0.757459 |
| O  | O199  | 0.617354 | 0.640872 | 0.220017 |
| O  | O200  | 0.865684 | 0.320200 | 0.739211 |
| O  | O201  | 0.612629 | 0.824761 | 0.254456 |
| O  | O202  | 0.197554 | 0.748043 | 0.158779 |
| O  | O203  | 0.290693 | 0.251602 | 0.658591 |
| O  | O204  | 0.791475 | 0.231346 | 0.830839 |
| O  | O205  | 0.684686 | 0.732487 | 0.344003 |
| Al | Al206 | 0.686169 | 0.650301 | 0.291146 |
| Si | Si207 | 0.410732 | 0.042447 | 0.170817 |
| Si | Si208 | 0.067573 | 0.546943 | 0.681728 |
| Si | Si209 | 0.420229 | 0.431737 | 0.172855 |
| Si | Si210 | 0.061503 | 0.935995 | 0.658468 |
| Si | Si211 | 0.570578 | 0.937243 | 0.819000 |
| Si | Si212 | 0.915867 | 0.432880 | 0.308204 |
| Si | Si213 | 0.563253 | 0.544734 | 0.815885 |
| Si | Si214 | 0.920983 | 0.041356 | 0.331273 |
| Si | Si215 | 0.306205 | 0.021281 | 0.331584 |
| Si | Si216 | 0.170198 | 0.524385 | 0.842139 |
| Si | Si217 | 0.309149 | 0.467953 | 0.323522 |
| Si | Si218 | 0.180041 | 0.964508 | 0.804756 |
| Si | Si219 | 0.676896 | 0.960596 | 0.659694 |
| Si | Si220 | 0.815275 | 0.456481 | 0.143305 |
| Si | Si221 | 0.676288 | 0.508353 | 0.672172 |
| Si | Si222 | 0.800917 | 0.013236 | 0.185410 |
| Si | Si223 | 0.269738 | 0.055994 | 0.547207 |
| Si | Si224 | 0.212691 | 0.549677 | 0.057267 |
| Si | Si225 | 0.267835 | 0.436911 | 0.539066 |
| Si | Si226 | 0.214693 | 0.928733 | 0.021263 |
| Si | Si227 | 0.713034 | 0.927809 | 0.444574 |

|    |       |          |          |          |
|----|-------|----------|----------|----------|
| Si | Si228 | 0.772233 | 0.427514 | 0.932087 |
| Si | Si229 | 0.715762 | 0.545784 | 0.456270 |
| Si | Si230 | 0.767967 | 0.050520 | 0.969551 |
| Si | Si231 | 0.114800 | 0.054344 | 0.525926 |
| Si | Si232 | 0.366482 | 0.550344 | 0.038974 |
| Si | Si233 | 0.113887 | 0.427667 | 0.538513 |
| Si | Si234 | 0.369095 | 0.922110 | 0.026724 |
| Si | Si235 | 0.868206 | 0.924161 | 0.463359 |
| Si | Si236 | 0.618074 | 0.427751 | 0.951071 |
| Si | Si237 | 0.869516 | 0.552237 | 0.450125 |
| Si | Si238 | 0.613157 | 0.057910 | 0.963055 |
| Si | Si239 | 0.069265 | 0.016361 | 0.315030 |
| Si | Si240 | 0.413633 | 0.520565 | 0.827170 |
| Si | Si241 | 0.066146 | 0.464472 | 0.325207 |
| Si | Si242 | 0.420951 | 0.966034 | 0.817314 |
| Si | Si243 | 0.912949 | 0.960866 | 0.673664 |
| Si | Si244 | 0.568868 | 0.455988 | 0.160883 |
| Si | Si245 | 0.917490 | 0.517073 | 0.663288 |
| Si | Si246 | 0.560609 | 0.015081 | 0.171106 |
| Si | Si247 | 0.188385 | 0.043951 | 0.181391 |
| Si | Si248 | 0.290285 | 0.553124 | 0.697388 |
| Si | Si249 | 0.185097 | 0.425834 | 0.195815 |
| Si | Si250 | 0.305350 | 0.931209 | 0.678284 |
| Si | Si251 | 0.794593 | 0.935386 | 0.810036 |
| Si | Si252 | 0.694708 | 0.432427 | 0.290116 |
| Si | Si253 | 0.799044 | 0.553117 | 0.797924 |
| Si | Si254 | 0.676463 | 0.051844 | 0.312189 |
| Si | Si255 | 0.417050 | 0.815673 | 0.175190 |
| Si | Si256 | 0.063784 | 0.318083 | 0.681878 |
| Si | Si257 | 0.416230 | 0.658876 | 0.187126 |
| Si | Si258 | 0.067059 | 0.160636 | 0.678329 |
| Si | Si259 | 0.565453 | 0.163960 | 0.811159 |
| Si | Si260 | 0.921910 | 0.660657 | 0.302305 |
| Si | Si261 | 0.568008 | 0.320357 | 0.799950 |
| Si | Si262 | 0.914668 | 0.818227 | 0.308718 |
| Si | Si263 | 0.303287 | 0.863950 | 0.319446 |
| Si | Si264 | 0.174003 | 0.364141 | 0.831352 |
| Si | Si265 | 0.308886 | 0.626614 | 0.339378 |
| Si | Si266 | 0.180511 | 0.123125 | 0.826212 |
| Si | Si267 | 0.679546 | 0.117968 | 0.666927 |
| Si | Si268 | 0.814353 | 0.614341 | 0.156945 |
| Si | Si269 | 0.677987 | 0.352167 | 0.652023 |
| Si | Si270 | 0.800062 | 0.854697 | 0.162992 |
| Si | Si271 | 0.262477 | 0.818600 | 0.531638 |

|    |       |          |          |          |
|----|-------|----------|----------|----------|
| Si | Si272 | 0.220268 | 0.314948 | 0.039035 |
| Si | Si273 | 0.264418 | 0.663524 | 0.552122 |
| Si | Si274 | 0.220088 | 0.158235 | 0.041449 |
| Si | Si275 | 0.720417 | 0.165246 | 0.454517 |
| Si | Si276 | 0.760814 | 0.664304 | 0.951963 |
| Si | Si277 | 0.723544 | 0.320963 | 0.438884 |
| Si | Si278 | 0.760027 | 0.819959 | 0.946423 |
| Si | Si279 | 0.109050 | 0.815387 | 0.532008 |
| Si | Si280 | 0.373794 | 0.313313 | 0.038881 |
| Si | Si281 | 0.110924 | 0.661775 | 0.539179 |
| Si | Si282 | 0.373758 | 0.160219 | 0.029576 |
| Si | Si283 | 0.873990 | 0.163696 | 0.456030 |
| Si | Si284 | 0.607103 | 0.663971 | 0.944774 |
| Si | Si285 | 0.877037 | 0.317850 | 0.451252 |
| Si | Si286 | 0.606737 | 0.817835 | 0.956490 |
| Si | Si287 | 0.062956 | 0.859523 | 0.320352 |
| Si | Si288 | 0.422309 | 0.362931 | 0.832076 |
| Si | Si289 | 0.070311 | 0.622280 | 0.319918 |
| Si | Si290 | 0.418037 | 0.123972 | 0.811786 |
| Si | Si291 | 0.919680 | 0.117104 | 0.667403 |
| Si | Si292 | 0.560517 | 0.613678 | 0.150353 |
| Si | Si293 | 0.917616 | 0.358816 | 0.668672 |
| Si | Si294 | 0.563346 | 0.856914 | 0.173277 |
| Si | Si295 | 0.182064 | 0.825876 | 0.180077 |
| Si | Si296 | 0.299801 | 0.327801 | 0.695735 |
| Si | Si297 | 0.193596 | 0.672793 | 0.201974 |
| Si | Si298 | 0.295820 | 0.174528 | 0.692764 |
| Si | Si299 | 0.801614 | 0.152876 | 0.808823 |
| Si | Si300 | 0.793475 | 0.305799 | 0.785004 |
| Si | Si301 | 0.684666 | 0.807600 | 0.298988 |
| Zn | Zn302 | 0.647976 | 0.697759 | 0.481288 |

**C<sub>4</sub>H<sub>8</sub>-Phys.Ads-ZnH<sup>+</sup> (Fig. 6/M3)** Total energy = -1925.17689047 eV

data\_

\_audit\_creation\_method 'Materials Studio'

\_cell\_length\_a 20.357621

\_cell\_length\_b 20.050598

\_cell\_length\_c 13.476578

\_cell\_angle\_alpha 90.000000

\_cell\_angle\_beta 90.000000

\_cell\_angle\_gamma 90.000000

\_symmetry\_space\_group\_name\_H-M 'P1'

loop\_

| <u>_atom_site_type_symbol</u> |     |          |          |          |
|-------------------------------|-----|----------|----------|----------|
| <u>_atom_site_label</u>       |     |          |          |          |
| <u>_atom_site_fract_x</u>     |     |          |          |          |
| <u>_atom_site_fract_y</u>     |     |          |          |          |
| <u>_atom_site_fract_z</u>     |     |          |          |          |
| H                             | H1  | 0.808024 | 0.745264 | 0.558238 |
| H                             | H2  | 0.472137 | 0.669830 | 0.458415 |
| H                             | H3  | 0.504180 | 0.749106 | 0.427440 |
| H                             | H4  | 0.476779 | 0.733094 | 0.550083 |
| H                             | H5  | 0.591901 | 0.663124 | 0.446665 |
| H                             | H6  | 0.568824 | 0.647755 | 0.570288 |
| H                             | H7  | 0.611782 | 0.788409 | 0.504212 |
| H                             | H8  | 0.659664 | 0.696423 | 0.672255 |
| H                             | H9  | 0.682974 | 0.784304 | 0.648861 |
| C                             | C10 | 0.501874 | 0.711231 | 0.486016 |
| C                             | C11 | 0.571056 | 0.686534 | 0.513013 |
| C                             | C12 | 0.615165 | 0.742061 | 0.546513 |
| C                             | C13 | 0.656289 | 0.740299 | 0.624972 |
| O                             | O14 | 0.517732 | 0.031300 | 0.214582 |
| O                             | O15 | 0.029445 | 0.528946 | 0.709424 |
| O                             | O16 | 0.520132 | 0.441401 | 0.203073 |
| O                             | O17 | 0.015603 | 0.933874 | 0.704519 |
| O                             | O18 | 0.521376 | 0.948411 | 0.786428 |
| O                             | O19 | 0.012858 | 0.452227 | 0.279780 |
| O                             | O20 | 0.521987 | 0.538750 | 0.784826 |
| O                             | O21 | 0.024339 | 0.044459 | 0.293646 |
| O                             | O22 | 0.400319 | 0.058935 | 0.285087 |
| O                             | O23 | 0.152973 | 0.554909 | 0.751780 |
| O                             | O24 | 0.392628 | 0.429754 | 0.235843 |
| O                             | O25 | 0.135385 | 0.943277 | 0.774743 |
| O                             | O26 | 0.639375 | 0.925823 | 0.713537 |
| O                             | O27 | 0.890391 | 0.422205 | 0.233103 |
| O                             | O28 | 0.648997 | 0.552377 | 0.750742 |
| O                             | O29 | 0.902775 | 0.034784 | 0.232506 |
| O                             | O30 | 0.442370 | 0.121395 | 0.124955 |
| O                             | O31 | 0.098019 | 0.610096 | 0.593818 |
| O                             | O32 | 0.449702 | 0.365836 | 0.086112 |
| O                             | O33 | 0.109227 | 0.858153 | 0.628829 |
| O                             | O34 | 0.600723 | 0.862243 | 0.874472 |
| O                             | O35 | 0.945348 | 0.366275 | 0.389595 |
| O                             | O36 | 0.592712 | 0.617251 | 0.899189 |
| O                             | O37 | 0.933453 | 0.118465 | 0.378923 |
| O                             | O38 | 0.410076 | 0.993388 | 0.115947 |
| O                             | O39 | 0.125271 | 0.480307 | 0.596141 |



|   |     |          |          |          |
|---|-----|----------|----------|----------|
| 0 | 040 | 0.436945 | 0.497349 | 0.077873 |
| 0 | 041 | 0.107298 | 0.988247 | 0.592321 |
| 0 | 042 | 0.628997 | 0.991828 | 0.881125 |
| 0 | 043 | 0.914538 | 0.495094 | 0.392067 |
| 0 | 044 | 0.605855 | 0.485401 | 0.910162 |
| 0 | 045 | 0.937539 | 0.987743 | 0.410973 |
| 0 | 046 | 0.341187 | 0.043923 | 0.455855 |
| 0 | 047 | 0.208609 | 0.557570 | 0.926090 |
| 0 | 048 | 0.337552 | 0.436943 | 0.412741 |
| 0 | 049 | 0.199945 | 0.946710 | 0.944239 |
| 0 | 050 | 0.703670 | 0.926633 | 0.547307 |
| 0 | 051 | 0.834892 | 0.422958 | 0.058757 |
| 0 | 052 | 0.701675 | 0.535849 | 0.574135 |
| 0 | 053 | 0.838065 | 0.039866 | 0.063787 |
| 0 | 054 | 0.346437 | 0.942817 | 0.325483 |
| 0 | 055 | 0.197606 | 0.441772 | 0.831544 |
| 0 | 056 | 0.337404 | 0.542393 | 0.293596 |
| 0 | 057 | 0.213741 | 0.045538 | 0.813090 |
| 0 | 058 | 0.691516 | 0.039666 | 0.649560 |
| 0 | 059 | 0.852710 | 0.537750 | 0.154597 |
| 0 | 060 | 0.699823 | 0.435303 | 0.702910 |
| 0 | 061 | 0.823912 | 0.934716 | 0.183155 |
| 0 | 062 | 0.269535 | 0.047170 | 0.293305 |
| 0 | 063 | 0.281382 | 0.533389 | 0.768352 |
| 0 | 064 | 0.263028 | 0.437605 | 0.253698 |
| 0 | 065 | 0.264945 | 0.927265 | 0.776629 |
| 0 | 066 | 0.769865 | 0.943334 | 0.713181 |
| 0 | 067 | 0.763040 | 0.450477 | 0.215359 |
| 0 | 068 | 0.778227 | 0.539336 | 0.729934 |
| 0 | 069 | 0.773810 | 0.051348 | 0.233661 |
| 0 | 070 | 0.312467 | 0.117899 | 0.611998 |
| 0 | 071 | 0.229814 | 0.627907 | 0.087236 |
| 0 | 072 | 0.325561 | 0.359975 | 0.567674 |
| 0 | 073 | 0.219119 | 0.869229 | 0.099109 |
| 0 | 074 | 0.729177 | 0.867291 | 0.379725 |
| 0 | 075 | 0.812631 | 0.354533 | 0.897125 |
| 0 | 076 | 0.725053 | 0.626252 | 0.436742 |
| 0 | 077 | 0.817440 | 0.115724 | 0.907322 |
| 0 | 078 | 0.223861 | 0.032982 | 0.539022 |
| 0 | 079 | 0.318946 | 0.538999 | 0.027683 |
| 0 | 080 | 0.220049 | 0.420936 | 0.495045 |
| 0 | 081 | 0.321062 | 0.928861 | 0.009395 |
| 0 | 082 | 0.817627 | 0.949906 | 0.456838 |
| 0 | 083 | 0.723165 | 0.441475 | 0.959655 |

|   |      |          |          |          |
|---|------|----------|----------|----------|
| 0 | 084  | 0.822472 | 0.550237 | 0.502371 |
| 0 | 085  | 0.717454 | 0.052005 | 0.994254 |
| 0 | 086  | 0.329406 | 0.986819 | 0.629785 |
| 0 | 087  | 0.205693 | 0.498228 | 0.100931 |
| 0 | 088  | 0.311241 | 0.491337 | 0.586985 |
| 0 | 089  | 0.237906 | 0.999166 | 0.115997 |
| 0 | 090  | 0.706792 | 0.997857 | 0.383223 |
| 0 | 091  | 0.835789 | 0.485404 | 0.886921 |
| 0 | 092  | 0.727655 | 0.498320 | 0.390423 |
| 0 | 093  | 0.805677 | 0.984420 | 0.892250 |
| 0 | 094  | 0.134066 | 0.118508 | 0.601873 |
| 0 | 095  | 0.411476 | 0.627483 | 0.073064 |
| 0 | 096  | 0.120594 | 0.349714 | 0.569045 |
| 0 | 097  | 0.419149 | 0.862180 | 0.090603 |
| 0 | 098  | 0.904736 | 0.859117 | 0.399635 |
| 0 | 099  | 0.629881 | 0.355219 | 0.907827 |
| 0 | 0100 | 0.914124 | 0.626192 | 0.415212 |
| 0 | 0101 | 0.619659 | 0.121472 | 0.915249 |
| 0 | 0102 | 0.118418 | 0.060060 | 0.428920 |
| 0 | 0103 | 0.420050 | 0.559009 | 0.905771 |
| 0 | 0104 | 0.100931 | 0.429017 | 0.418071 |
| 0 | 0105 | 0.443504 | 0.942785 | 0.942336 |
| 0 | 0106 | 0.918507 | 0.917157 | 0.573966 |
| 0 | 0107 | 0.620352 | 0.419420 | 0.078373 |
| 0 | 0108 | 0.944161 | 0.548346 | 0.566925 |
| 0 | 0109 | 0.595413 | 0.036415 | 0.059063 |
| 0 | 0110 | 0.145708 | 0.046156 | 0.236474 |
| 0 | 0111 | 0.404424 | 0.533042 | 0.711715 |
| 0 | 0112 | 0.134802 | 0.428505 | 0.227080 |
| 0 | 0113 | 0.395433 | 0.917883 | 0.762968 |
| 0 | 0114 | 0.894644 | 0.939304 | 0.765607 |
| 0 | 0115 | 0.639342 | 0.444911 | 0.270596 |
| 0 | 0116 | 0.905895 | 0.554078 | 0.756888 |
| 0 | 0117 | 0.643528 | 0.060767 | 0.239440 |
| 0 | 0118 | 0.103915 | 0.943283 | 0.342409 |
| 0 | 0119 | 0.442054 | 0.438201 | 0.836395 |
| 0 | 0120 | 0.106578 | 0.542235 | 0.319249 |
| 0 | 0121 | 0.429025 | 0.040663 | 0.811757 |
| 0 | 0122 | 0.939323 | 0.036120 | 0.649625 |
| 0 | 0123 | 0.598624 | 0.540568 | 0.146743 |
| 0 | 0124 | 0.936194 | 0.438094 | 0.675143 |
| 0 | 0125 | 0.609810 | 0.938340 | 0.189071 |
| 0 | 0126 | 0.228543 | 0.128040 | 0.149954 |
| 0 | 0127 | 0.323109 | 0.618770 | 0.630476 |

|   |      |          |          |          |
|---|------|----------|----------|----------|
| 0 | 0128 | 0.214672 | 0.365684 | 0.106366 |
| 0 | 0129 | 0.319993 | 0.853526 | 0.638666 |
| 0 | 0130 | 0.810435 | 0.856615 | 0.848381 |
| 0 | 0131 | 0.726155 | 0.367840 | 0.358711 |
| 0 | 0132 | 0.822420 | 0.618021 | 0.871279 |
| 0 | 0133 | 0.715250 | 0.129452 | 0.364389 |
| 0 | 0134 | 0.517732 | 0.846256 | 0.219171 |
| 0 | 0135 | 0.028815 | 0.347186 | 0.711659 |
| 0 | 0136 | 0.508871 | 0.628887 | 0.205160 |
| 0 | 0137 | 0.024390 | 0.127932 | 0.709380 |
| 0 | 0138 | 0.523053 | 0.130844 | 0.781389 |
| 0 | 0139 | 0.014261 | 0.633224 | 0.286867 |
| 0 | 0140 | 0.529872 | 0.348226 | 0.779543 |
| 0 | 0141 | 0.014790 | 0.852446 | 0.291851 |
| 0 | 0142 | 0.396289 | 0.825068 | 0.276593 |
| 0 | 0143 | 0.153406 | 0.328258 | 0.756475 |
| 0 | 0144 | 0.388480 | 0.660123 | 0.262804 |
| 0 | 0145 | 0.139313 | 0.153547 | 0.791494 |
| 0 | 0146 | 0.644915 | 0.151421 | 0.726813 |
| 0 | 0147 | 0.894428 | 0.653570 | 0.223580 |
| 0 | 0148 | 0.650203 | 0.316101 | 0.720470 |
| 0 | 0149 | 0.900704 | 0.828455 | 0.208172 |
| 0 | 0150 | 0.452302 | 0.742222 | 0.146518 |
| 0 | 0151 | 0.089896 | 0.236141 | 0.654885 |
| 0 | 0152 | 0.587076 | 0.238460 | 0.846538 |
| 0 | 0153 | 0.949213 | 0.742554 | 0.341657 |
| 0 | 0154 | 0.335462 | 0.839649 | 0.445946 |
| 0 | 0155 | 0.219994 | 0.325430 | 0.919875 |
| 0 | 0156 | 0.333233 | 0.635284 | 0.436239 |
| 0 | 0157 | 0.208325 | 0.138007 | 0.955812 |
| 0 | 0158 | 0.706599 | 0.155060 | 0.557609 |
| 0 | 0159 | 0.827296 | 0.650725 | 0.060592 |
| 0 | 0160 | 0.708811 | 0.349621 | 0.550830 |
| 0 | 0161 | 0.833956 | 0.841606 | 0.041269 |
| 0 | 0162 | 0.266659 | 0.843414 | 0.279173 |
| 0 | 0163 | 0.281646 | 0.356168 | 0.752795 |
| 0 | 0164 | 0.258151 | 0.646869 | 0.278743 |
| 0 | 0165 | 0.270393 | 0.162263 | 0.787809 |
| 0 | 0166 | 0.773764 | 0.129257 | 0.722502 |
| 0 | 0167 | 0.766849 | 0.623851 | 0.231096 |
| 0 | 0168 | 0.780942 | 0.331281 | 0.708755 |
| 0 | 0169 | 0.769991 | 0.816519 | 0.207119 |
| 0 | 0170 | 0.301857 | 0.736437 | 0.556362 |
| 0 | 0171 | 0.247846 | 0.242313 | 0.064655 |

|    |       |          |          |          |
|----|-------|----------|----------|----------|
| O  | O172  | 0.742715 | 0.248586 | 0.431480 |
| O  | O173  | 0.793236 | 0.739928 | 0.926749 |
| O  | O174  | 0.215954 | 0.834106 | 0.521728 |
| O  | O175  | 0.330169 | 0.341211 | 0.021408 |
| O  | O176  | 0.216080 | 0.638304 | 0.522246 |
| O  | O177  | 0.329574 | 0.141145 | 0.026407 |
| O  | O178  | 0.823083 | 0.146909 | 0.473433 |
| O  | O179  | 0.711428 | 0.640880 | 0.969858 |
| O  | O180  | 0.829138 | 0.344020 | 0.474176 |
| O  | O181  | 0.711861 | 0.839571 | 0.975206 |
| O  | O182  | 0.132331 | 0.736123 | 0.567470 |
| O  | O183  | 0.412733 | 0.240871 | 0.061257 |
| O  | O184  | 0.909034 | 0.242640 | 0.428460 |
| O  | O185  | 0.628687 | 0.741409 | 0.931717 |
| O  | O186  | 0.099160 | 0.828338 | 0.436219 |
| O  | O187  | 0.433262 | 0.315710 | 0.904811 |
| O  | O188  | 0.110588 | 0.659226 | 0.412012 |
| O  | O189  | 0.443282 | 0.144580 | 0.932725 |
| O  | O190  | 0.936328 | 0.155524 | 0.569703 |
| O  | O191  | 0.606046 | 0.663775 | 0.083890 |
| O  | O192  | 0.938955 | 0.324062 | 0.575224 |
| O  | O193  | 0.596903 | 0.835184 | 0.065455 |
| O  | O194  | 0.139198 | 0.833495 | 0.247146 |
| O  | O195  | 0.407964 | 0.337994 | 0.715323 |
| O  | O196  | 0.134802 | 0.652485 | 0.219178 |
| O  | O197  | 0.398219 | 0.160362 | 0.748333 |
| O  | O198  | 0.900473 | 0.139375 | 0.758986 |
| O  | O199  | 0.629698 | 0.638067 | 0.274597 |
| O  | O200  | 0.905558 | 0.324814 | 0.765223 |
| O  | O201  | 0.642779 | 0.818424 | 0.249302 |
| O  | O202  | 0.219595 | 0.746756 | 0.163760 |
| O  | O203  | 0.320899 | 0.245477 | 0.657947 |
| O  | O204  | 0.819924 | 0.233292 | 0.825429 |
| O  | O205  | 0.721533 | 0.739055 | 0.349279 |
| Al | Al206 | 0.708966 | 0.654097 | 0.312243 |
| Si | Si207 | 0.443174 | 0.051077 | 0.184352 |
| Si | Si208 | 0.101288 | 0.543506 | 0.662103 |
| Si | Si209 | 0.448915 | 0.434039 | 0.151004 |
| Si | Si210 | 0.092540 | 0.930964 | 0.674928 |
| Si | Si211 | 0.596976 | 0.932253 | 0.815062 |
| Si | Si212 | 0.941016 | 0.434019 | 0.323948 |
| Si | Si213 | 0.593173 | 0.548137 | 0.836795 |
| Si | Si214 | 0.948564 | 0.046483 | 0.329245 |
| Si | Si215 | 0.339054 | 0.022813 | 0.340092 |

|    |       |          |          |          |
|----|-------|----------|----------|----------|
| Si | Si216 | 0.210093 | 0.521431 | 0.818861 |
| Si | Si217 | 0.332735 | 0.461762 | 0.298807 |
| Si | Si218 | 0.203483 | 0.965647 | 0.827411 |
| Si | Si219 | 0.701306 | 0.959648 | 0.657044 |
| Si | Si220 | 0.835237 | 0.459343 | 0.166010 |
| Si | Si221 | 0.707259 | 0.515382 | 0.689976 |
| Si | Si222 | 0.834643 | 0.015042 | 0.178152 |
| Si | Si223 | 0.301420 | 0.045971 | 0.559852 |
| Si | Si224 | 0.241052 | 0.555841 | 0.035646 |
| Si | Si225 | 0.298323 | 0.427416 | 0.516108 |
| Si | Si226 | 0.244449 | 0.935718 | 0.042745 |
| Si | Si227 | 0.739792 | 0.935548 | 0.440938 |
| Si | Si228 | 0.801325 | 0.426082 | 0.950286 |
| Si | Si229 | 0.744639 | 0.551939 | 0.475775 |
| Si | Si230 | 0.794750 | 0.048219 | 0.963695 |
| Si | Si231 | 0.145997 | 0.049992 | 0.540697 |
| Si | Si232 | 0.396856 | 0.555889 | 0.021002 |
| Si | Si233 | 0.142127 | 0.420295 | 0.519570 |
| Si | Si234 | 0.398198 | 0.932004 | 0.039817 |
| Si | Si235 | 0.894523 | 0.928138 | 0.460378 |
| Si | Si236 | 0.645112 | 0.425151 | 0.964328 |
| Si | Si237 | 0.898930 | 0.555207 | 0.468635 |
| Si | Si238 | 0.640604 | 0.050344 | 0.962480 |
| Si | Si239 | 0.097910 | 0.023200 | 0.325901 |
| Si | Si240 | 0.447059 | 0.517300 | 0.810508 |
| Si | Si241 | 0.089009 | 0.463278 | 0.310593 |
| Si | Si242 | 0.447345 | 0.962311 | 0.825568 |
| Si | Si243 | 0.942296 | 0.956726 | 0.673180 |
| Si | Si244 | 0.594856 | 0.461933 | 0.174186 |
| Si | Si245 | 0.953497 | 0.517326 | 0.677506 |
| Si | Si246 | 0.591713 | 0.016823 | 0.175940 |
| Si | Si247 | 0.220553 | 0.054726 | 0.199002 |
| Si | Si248 | 0.329678 | 0.543738 | 0.674034 |
| Si | Si249 | 0.205168 | 0.432681 | 0.171463 |
| Si | Si250 | 0.327031 | 0.921905 | 0.701554 |
| Si | Si251 | 0.820058 | 0.931228 | 0.804735 |
| Si | Si252 | 0.714381 | 0.440394 | 0.309026 |
| Si | Si253 | 0.835394 | 0.549102 | 0.812523 |
| Si | Si254 | 0.710235 | 0.059482 | 0.305030 |
| Si | Si255 | 0.446291 | 0.818757 | 0.183355 |
| Si | Si256 | 0.097898 | 0.315479 | 0.672977 |
| Si | Si257 | 0.440756 | 0.664044 | 0.171706 |
| Si | Si258 | 0.096699 | 0.159240 | 0.689563 |
| Si | Si259 | 0.593577 | 0.160495 | 0.817261 |

|    |       |          |          |          |
|----|-------|----------|----------|----------|
| Si | Si260 | 0.942965 | 0.663631 | 0.316715 |
| Si | Si261 | 0.599248 | 0.315125 | 0.813707 |
| Si | Si262 | 0.942659 | 0.820174 | 0.310305 |
| Si | Si263 | 0.335996 | 0.862893 | 0.331146 |
| Si | Si264 | 0.213402 | 0.363289 | 0.814605 |
| Si | Si265 | 0.329321 | 0.621037 | 0.317917 |
| Si | Si266 | 0.207556 | 0.124701 | 0.837123 |
| Si | Si267 | 0.704497 | 0.118753 | 0.664674 |
| Si | Si268 | 0.833298 | 0.616238 | 0.169283 |
| Si | Si269 | 0.709874 | 0.357955 | 0.670458 |
| Si | Si270 | 0.832772 | 0.855625 | 0.159852 |
| Si | Si271 | 0.292901 | 0.815744 | 0.540955 |
| Si | Si272 | 0.253300 | 0.318887 | 0.028430 |
| Si | Si273 | 0.293278 | 0.657662 | 0.535384 |
| Si | Si274 | 0.253585 | 0.162718 | 0.048373 |
| Si | Si275 | 0.747088 | 0.169952 | 0.456442 |
| Si | Si276 | 0.788491 | 0.662055 | 0.957897 |
| Si | Si277 | 0.751837 | 0.327128 | 0.454475 |
| Si | Si278 | 0.787525 | 0.818815 | 0.948830 |
| Si | Si279 | 0.139003 | 0.814436 | 0.538397 |
| Si | Si280 | 0.406370 | 0.316094 | 0.018365 |
| Si | Si281 | 0.139256 | 0.660872 | 0.524061 |
| Si | Si282 | 0.406758 | 0.162075 | 0.036181 |
| Si | Si283 | 0.900717 | 0.165518 | 0.462840 |
| Si | Si284 | 0.634944 | 0.665286 | 0.972113 |
| Si | Si285 | 0.905364 | 0.319368 | 0.466579 |
| Si | Si286 | 0.634715 | 0.819319 | 0.962289 |
| Si | Si287 | 0.089555 | 0.864346 | 0.329272 |
| Si | Si288 | 0.453358 | 0.360254 | 0.808616 |
| Si | Si289 | 0.091381 | 0.621537 | 0.309406 |
| Si | Si290 | 0.448151 | 0.119114 | 0.818848 |
| Si | Si291 | 0.949806 | 0.114825 | 0.671910 |
| Si | Si292 | 0.586668 | 0.617956 | 0.180092 |
| Si | Si293 | 0.952392 | 0.358920 | 0.681835 |
| Si | Si294 | 0.591936 | 0.859583 | 0.179945 |
| Si | Si295 | 0.211184 | 0.823654 | 0.197648 |
| Si | Si296 | 0.334055 | 0.324330 | 0.674596 |
| Si | Si297 | 0.210263 | 0.668244 | 0.187145 |
| Si | Si298 | 0.325541 | 0.170342 | 0.701221 |
| Si | Si299 | 0.827848 | 0.154505 | 0.802965 |
| Si | Si300 | 0.830154 | 0.311301 | 0.799352 |
| Si | Si301 | 0.716003 | 0.811382 | 0.295710 |
| Zn | Zn302 | 0.749895 | 0.718164 | 0.499331 |

**TS-C<sub>4</sub>H<sub>10</sub>-Dehydro-on-FrameworkO-ZnH<sup>+</sup> (Fig. 6/TS3)**

Total energy = -1931.44571421 eV

data\_

\_audit\_creation\_method 'Materials Studio'

\_cell\_length\_a 20.357621

\_cell\_length\_b 20.050598

\_cell\_length\_c 13.476578

\_cell\_angle\_alpha 90.000000

\_cell\_angle\_beta 90.000000

\_cell\_angle\_gamma 90.000000

\_symmetry\_space\_group\_name\_H-M 'P1'

loop\_

\_atom\_site\_type\_symbol

\_atom\_site\_label

\_atom\_site\_fract\_x

\_atom\_site\_fract\_y

\_atom\_site\_fract\_z

|   |     |          |          |          |
|---|-----|----------|----------|----------|
| H | H1  | 0.449081 | 0.609673 | 0.514980 |
| H | H2  | 0.479959 | 0.530494 | 0.480518 |
| H | H3  | 0.488509 | 0.599259 | 0.399028 |
| H | H4  | 0.593988 | 0.574190 | 0.485776 |
| H | H5  | 0.555590 | 0.583126 | 0.601668 |
| H | H6  | 0.528237 | 0.701357 | 0.562511 |
| H | H7  | 0.570095 | 0.695555 | 0.449157 |
| H | H8  | 0.642379 | 0.663738 | 0.644756 |
| H | H9  | 0.623095 | 0.745291 | 0.617197 |
| H | H10 | 0.681816 | 0.656688 | 0.507112 |
| H | H11 | 0.778976 | 0.791047 | 0.563292 |
| C | C12 | 0.489381 | 0.584282 | 0.477053 |
| C | C13 | 0.555300 | 0.601314 | 0.525028 |
| C | C14 | 0.569661 | 0.676590 | 0.525536 |
| C | C15 | 0.633770 | 0.696769 | 0.581206 |
| O | O16 | 0.514226 | 0.032217 | 0.215330 |
| O | O17 | 0.029028 | 0.532538 | 0.710795 |
| O | O18 | 0.517323 | 0.446115 | 0.209784 |
| O | O19 | 0.011493 | 0.931783 | 0.699846 |
| O | O20 | 0.515664 | 0.948935 | 0.786183 |
| O | O21 | 0.010688 | 0.458268 | 0.288683 |
| O | O22 | 0.521415 | 0.534769 | 0.788453 |
| O | O23 | 0.020978 | 0.044512 | 0.293050 |
| O | O24 | 0.397019 | 0.061480 | 0.286179 |
| O | O25 | 0.152507 | 0.560695 | 0.751334 |
| O | O26 | 0.389144 | 0.434554 | 0.237858 |
| O | O27 | 0.128963 | 0.950585 | 0.775649 |

|   |     |          |          |          |
|---|-----|----------|----------|----------|
| 0 | 028 | 0.633622 | 0.933477 | 0.711393 |
| 0 | 029 | 0.887986 | 0.429252 | 0.243714 |
| 0 | 030 | 0.648600 | 0.546648 | 0.758900 |
| 0 | 031 | 0.898582 | 0.040424 | 0.232571 |
| 0 | 032 | 0.439299 | 0.121527 | 0.123791 |
| 0 | 033 | 0.095482 | 0.613444 | 0.592483 |
| 0 | 034 | 0.448732 | 0.368391 | 0.092892 |
| 0 | 035 | 0.111395 | 0.861860 | 0.631840 |
| 0 | 036 | 0.598054 | 0.860030 | 0.863446 |
| 0 | 037 | 0.944175 | 0.371149 | 0.398161 |
| 0 | 038 | 0.589241 | 0.617124 | 0.899715 |
| 0 | 039 | 0.933736 | 0.121769 | 0.380397 |
| 0 | 040 | 0.405470 | 0.993608 | 0.119673 |
| 0 | 041 | 0.125039 | 0.484134 | 0.597639 |
| 0 | 042 | 0.435830 | 0.500026 | 0.079929 |
| 0 | 043 | 0.102232 | 0.991494 | 0.591115 |
| 0 | 044 | 0.621224 | 0.989245 | 0.888187 |
| 0 | 045 | 0.913266 | 0.499644 | 0.405104 |
| 0 | 046 | 0.603354 | 0.485834 | 0.921671 |
| 0 | 047 | 0.932323 | 0.990618 | 0.410068 |
| 0 | 048 | 0.336369 | 0.048700 | 0.456097 |
| 0 | 049 | 0.206193 | 0.560226 | 0.927820 |
| 0 | 050 | 0.336149 | 0.441776 | 0.415550 |
| 0 | 051 | 0.195777 | 0.948799 | 0.942633 |
| 0 | 052 | 0.701052 | 0.940751 | 0.549738 |
| 0 | 053 | 0.833095 | 0.424792 | 0.068372 |
| 0 | 054 | 0.707335 | 0.531640 | 0.587151 |
| 0 | 055 | 0.835075 | 0.039679 | 0.061368 |
| 0 | 056 | 0.344547 | 0.945147 | 0.331133 |
| 0 | 057 | 0.194834 | 0.446187 | 0.828677 |
| 0 | 058 | 0.333941 | 0.547185 | 0.296301 |
| 0 | 059 | 0.212238 | 0.048927 | 0.814595 |
| 0 | 060 | 0.703335 | 0.042820 | 0.679549 |
| 0 | 061 | 0.842643 | 0.541181 | 0.160948 |
| 0 | 062 | 0.716499 | 0.436315 | 0.722530 |
| 0 | 063 | 0.821000 | 0.938058 | 0.187591 |
| 0 | 064 | 0.266348 | 0.047448 | 0.291869 |
| 0 | 065 | 0.280594 | 0.538040 | 0.771506 |
| 0 | 066 | 0.259548 | 0.442039 | 0.258403 |
| 0 | 067 | 0.257750 | 0.929457 | 0.771633 |
| 0 | 068 | 0.765171 | 0.930769 | 0.718381 |
| 0 | 069 | 0.759419 | 0.448220 | 0.224486 |
| 0 | 070 | 0.778596 | 0.551763 | 0.746463 |
| 0 | 071 | 0.769416 | 0.055969 | 0.228143 |



|   |      |          |          |          |
|---|------|----------|----------|----------|
| 0 | 072  | 0.307312 | 0.122315 | 0.612364 |
| 0 | 073  | 0.231137 | 0.630627 | 0.087785 |
| 0 | 074  | 0.328280 | 0.364212 | 0.570453 |
| 0 | 075  | 0.214116 | 0.873954 | 0.099990 |
| 0 | 076  | 0.712647 | 0.875320 | 0.383234 |
| 0 | 077  | 0.810301 | 0.354204 | 0.907926 |
| 0 | 078  | 0.706810 | 0.623652 | 0.450107 |
| 0 | 079  | 0.809630 | 0.113466 | 0.903310 |
| 0 | 080  | 0.219390 | 0.036184 | 0.540093 |
| 0 | 081  | 0.317588 | 0.539807 | 0.026510 |
| 0 | 082  | 0.220051 | 0.421954 | 0.500340 |
| 0 | 083  | 0.316663 | 0.932121 | 0.008752 |
| 0 | 084  | 0.813037 | 0.948774 | 0.449258 |
| 0 | 085  | 0.721131 | 0.441793 | 0.969765 |
| 0 | 086  | 0.819659 | 0.565001 | 0.499863 |
| 0 | 087  | 0.712956 | 0.049302 | 0.995712 |
| 0 | 088  | 0.325849 | 0.991964 | 0.630898 |
| 0 | 089  | 0.204301 | 0.501481 | 0.102956 |
| 0 | 090  | 0.309745 | 0.494791 | 0.590605 |
| 0 | 091  | 0.233078 | 0.004021 | 0.112586 |
| 0 | 092  | 0.705259 | 0.007205 | 0.383601 |
| 0 | 093  | 0.833954 | 0.483393 | 0.892927 |
| 0 | 094  | 0.728445 | 0.497606 | 0.400191 |
| 0 | 095  | 0.800313 | 0.982192 | 0.892038 |
| 0 | 096  | 0.129710 | 0.121824 | 0.602415 |
| 0 | 097  | 0.407824 | 0.629975 | 0.075417 |
| 0 | 098  | 0.119324 | 0.353104 | 0.573082 |
| 0 | 099  | 0.413540 | 0.862906 | 0.088217 |
| 0 | 0100 | 0.904780 | 0.860651 | 0.400023 |
| 0 | 0101 | 0.626886 | 0.355624 | 0.919147 |
| 0 | 0102 | 0.918953 | 0.631846 | 0.419409 |
| 0 | 0103 | 0.620920 | 0.121115 | 0.906594 |
| 0 | 0104 | 0.114447 | 0.064176 | 0.428723 |
| 0 | 0105 | 0.420159 | 0.561931 | 0.908195 |
| 0 | 0106 | 0.101841 | 0.431374 | 0.420435 |
| 0 | 0107 | 0.439741 | 0.946636 | 0.944267 |
| 0 | 0108 | 0.911378 | 0.919675 | 0.573006 |
| 0 | 0109 | 0.619103 | 0.419756 | 0.089812 |
| 0 | 0110 | 0.937606 | 0.558156 | 0.578329 |
| 0 | 0111 | 0.589945 | 0.045604 | 0.059031 |
| 0 | 0112 | 0.142396 | 0.051283 | 0.236224 |
| 0 | 0113 | 0.403655 | 0.535767 | 0.714651 |
| 0 | 0114 | 0.131367 | 0.432750 | 0.228029 |
| 0 | 0115 | 0.388713 | 0.922679 | 0.766823 |

|   |      |          |          |          |
|---|------|----------|----------|----------|
| 0 | 0116 | 0.891358 | 0.944676 | 0.764157 |
| 0 | 0117 | 0.635901 | 0.449217 | 0.281542 |
| 0 | 0118 | 0.907650 | 0.554549 | 0.771071 |
| 0 | 0119 | 0.639180 | 0.065808 | 0.239299 |
| 0 | 0120 | 0.105077 | 0.946932 | 0.342163 |
| 0 | 0121 | 0.436444 | 0.439596 | 0.840793 |
| 0 | 0122 | 0.107361 | 0.545733 | 0.324038 |
| 0 | 0123 | 0.426745 | 0.044564 | 0.814068 |
| 0 | 0124 | 0.941033 | 0.037289 | 0.644466 |
| 0 | 0125 | 0.598864 | 0.542474 | 0.151242 |
| 0 | 0126 | 0.935491 | 0.442862 | 0.673178 |
| 0 | 0127 | 0.609284 | 0.943280 | 0.181065 |
| 0 | 0128 | 0.227001 | 0.132071 | 0.151731 |
| 0 | 0129 | 0.323116 | 0.621985 | 0.632124 |
| 0 | 0130 | 0.212588 | 0.368980 | 0.110728 |
| 0 | 0131 | 0.318297 | 0.858803 | 0.635608 |
| 0 | 0132 | 0.818887 | 0.854691 | 0.855795 |
| 0 | 0133 | 0.719399 | 0.367843 | 0.369548 |
| 0 | 0134 | 0.830566 | 0.616169 | 0.898694 |
| 0 | 0135 | 0.714324 | 0.137865 | 0.357042 |
| 0 | 0136 | 0.516791 | 0.851803 | 0.209844 |
| 0 | 0137 | 0.027371 | 0.351755 | 0.714423 |
| 0 | 0138 | 0.508034 | 0.631159 | 0.201793 |
| 0 | 0139 | 0.020995 | 0.131697 | 0.711551 |
| 0 | 0140 | 0.519841 | 0.135151 | 0.781303 |
| 0 | 0141 | 0.015533 | 0.636069 | 0.285835 |
| 0 | 0142 | 0.527763 | 0.351445 | 0.788562 |
| 0 | 0143 | 0.014837 | 0.857521 | 0.291482 |
| 0 | 0144 | 0.398017 | 0.829666 | 0.277020 |
| 0 | 0145 | 0.151779 | 0.330425 | 0.760723 |
| 0 | 0146 | 0.389277 | 0.663191 | 0.265791 |
| 0 | 0147 | 0.136387 | 0.155931 | 0.792687 |
| 0 | 0148 | 0.639900 | 0.155540 | 0.718535 |
| 0 | 0149 | 0.894874 | 0.653247 | 0.226847 |
| 0 | 0150 | 0.648481 | 0.324729 | 0.729255 |
| 0 | 0151 | 0.901044 | 0.833433 | 0.207902 |
| 0 | 0152 | 0.451354 | 0.744939 | 0.146374 |
| 0 | 0153 | 0.087014 | 0.239725 | 0.658041 |
| 0 | 0154 | 0.586961 | 0.240319 | 0.847798 |
| 0 | 0155 | 0.951436 | 0.746118 | 0.337891 |
| 0 | 0156 | 0.334388 | 0.838109 | 0.443867 |
| 0 | 0157 | 0.220371 | 0.332486 | 0.922687 |
| 0 | 0158 | 0.330898 | 0.641034 | 0.437959 |
| 0 | 0159 | 0.205325 | 0.141256 | 0.957365 |

|   |      |          |          |          |
|---|------|----------|----------|----------|
| 0 | 0160 | 0.704668 | 0.143449 | 0.552429 |
| 0 | 0161 | 0.810403 | 0.658120 | 0.083047 |
| 0 | 0162 | 0.711041 | 0.355825 | 0.563973 |
| 0 | 0163 | 0.826388 | 0.841887 | 0.050534 |
| 0 | 0164 | 0.268209 | 0.845632 | 0.274466 |
| 0 | 0165 | 0.279736 | 0.360427 | 0.752804 |
| 0 | 0166 | 0.258581 | 0.654143 | 0.278674 |
| 0 | 0167 | 0.267325 | 0.166333 | 0.789533 |
| 0 | 0168 | 0.770458 | 0.151502 | 0.722163 |
| 0 | 0169 | 0.769277 | 0.626574 | 0.264307 |
| 0 | 0170 | 0.780074 | 0.321819 | 0.721076 |
| 0 | 0171 | 0.771763 | 0.819352 | 0.226132 |
| 0 | 0172 | 0.299002 | 0.739738 | 0.562251 |
| 0 | 0173 | 0.244499 | 0.246046 | 0.064774 |
| 0 | 0174 | 0.738012 | 0.250631 | 0.449598 |
| 0 | 0175 | 0.792601 | 0.739456 | 0.932981 |
| 0 | 0176 | 0.214691 | 0.836879 | 0.518237 |
| 0 | 0177 | 0.328965 | 0.344240 | 0.029406 |
| 0 | 0178 | 0.214629 | 0.640811 | 0.526383 |
| 0 | 0179 | 0.326884 | 0.145332 | 0.026396 |
| 0 | 0180 | 0.821672 | 0.149259 | 0.469592 |
| 0 | 0181 | 0.709084 | 0.639827 | 0.962498 |
| 0 | 0182 | 0.827065 | 0.346622 | 0.476153 |
| 0 | 0183 | 0.710027 | 0.840964 | 0.964181 |
| 0 | 0184 | 0.131078 | 0.739720 | 0.568522 |
| 0 | 0185 | 0.411167 | 0.243028 | 0.067894 |
| 0 | 0186 | 0.908173 | 0.246189 | 0.431389 |
| 0 | 0187 | 0.626552 | 0.741596 | 0.929642 |
| 0 | 0188 | 0.095909 | 0.833341 | 0.439732 |
| 0 | 0189 | 0.431111 | 0.317678 | 0.911915 |
| 0 | 0190 | 0.111474 | 0.664086 | 0.411592 |
| 0 | 0191 | 0.440375 | 0.150012 | 0.932834 |
| 0 | 0192 | 0.932631 | 0.158314 | 0.571874 |
| 0 | 0193 | 0.607076 | 0.664653 | 0.083152 |
| 0 | 0194 | 0.934471 | 0.325614 | 0.582705 |
| 0 | 0195 | 0.595402 | 0.840686 | 0.056052 |
| 0 | 0196 | 0.139751 | 0.834857 | 0.252662 |
| 0 | 0197 | 0.406521 | 0.337588 | 0.721624 |
| 0 | 0198 | 0.135559 | 0.654214 | 0.218606 |
| 0 | 0199 | 0.394801 | 0.163131 | 0.748014 |
| 0 | 0200 | 0.896552 | 0.133846 | 0.759686 |
| 0 | 0201 | 0.627970 | 0.642328 | 0.274888 |
| 0 | 0202 | 0.905151 | 0.334060 | 0.774469 |
| 0 | 0203 | 0.642223 | 0.821830 | 0.237633 |

|    |       |          |          |          |
|----|-------|----------|----------|----------|
| O  | O204  | 0.217391 | 0.750436 | 0.159609 |
| O  | O205  | 0.317577 | 0.249148 | 0.658845 |
| O  | O206  | 0.833192 | 0.234125 | 0.843260 |
| O  | O207  | 0.710207 | 0.745385 | 0.360716 |
| Al | Al208 | 0.703257 | 0.661075 | 0.325239 |
| Si | Si209 | 0.439623 | 0.052128 | 0.185406 |
| Si | Si210 | 0.100459 | 0.547640 | 0.662448 |
| Si | Si211 | 0.446882 | 0.437709 | 0.155337 |
| Si | Si212 | 0.089084 | 0.934072 | 0.674325 |
| Si | Si213 | 0.591589 | 0.933299 | 0.813467 |
| Si | Si214 | 0.939258 | 0.439653 | 0.334085 |
| Si | Si215 | 0.591499 | 0.545818 | 0.842988 |
| Si | Si216 | 0.945353 | 0.049395 | 0.329117 |
| Si | Si217 | 0.335774 | 0.025252 | 0.341274 |
| Si | Si218 | 0.208491 | 0.525838 | 0.819313 |
| Si | Si219 | 0.329728 | 0.466557 | 0.301822 |
| Si | Si220 | 0.198739 | 0.969346 | 0.826474 |
| Si | Si221 | 0.701161 | 0.962621 | 0.664795 |
| Si | Si222 | 0.830970 | 0.461868 | 0.175123 |
| Si | Si223 | 0.712780 | 0.516209 | 0.704806 |
| Si | Si224 | 0.831243 | 0.018274 | 0.177462 |
| Si | Si225 | 0.296878 | 0.050294 | 0.560313 |
| Si | Si226 | 0.240052 | 0.558189 | 0.036452 |
| Si | Si227 | 0.298248 | 0.430722 | 0.519648 |
| Si | Si228 | 0.239978 | 0.939404 | 0.041690 |
| Si | Si229 | 0.733855 | 0.942569 | 0.440675 |
| Si | Si230 | 0.799243 | 0.426134 | 0.959794 |
| Si | Si231 | 0.742204 | 0.552236 | 0.484374 |
| Si | Si232 | 0.789839 | 0.046362 | 0.962681 |
| Si | Si233 | 0.141510 | 0.053443 | 0.540755 |
| Si | Si234 | 0.395318 | 0.558178 | 0.022651 |
| Si | Si235 | 0.141959 | 0.423053 | 0.522949 |
| Si | Si236 | 0.393636 | 0.934035 | 0.040370 |
| Si | Si237 | 0.890180 | 0.929804 | 0.458090 |
| Si | Si238 | 0.643053 | 0.425511 | 0.975304 |
| Si | Si239 | 0.897834 | 0.563514 | 0.474847 |
| Si | Si240 | 0.636442 | 0.051241 | 0.961865 |
| Si | Si241 | 0.095358 | 0.026524 | 0.325595 |
| Si | Si242 | 0.445241 | 0.518177 | 0.813782 |
| Si | Si243 | 0.087946 | 0.467234 | 0.314779 |
| Si | Si244 | 0.442726 | 0.965721 | 0.827280 |
| Si | Si245 | 0.939006 | 0.958293 | 0.670429 |
| Si | Si246 | 0.592855 | 0.464704 | 0.182709 |
| Si | Si247 | 0.952169 | 0.521952 | 0.683836 |

|    |       |          |          |          |
|----|-------|----------|----------|----------|
| Si | Si248 | 0.588356 | 0.021569 | 0.174283 |
| Si | Si249 | 0.217363 | 0.058195 | 0.198339 |
| Si | Si250 | 0.328956 | 0.547288 | 0.676959 |
| Si | Si251 | 0.202610 | 0.436453 | 0.174550 |
| Si | Si252 | 0.322232 | 0.926279 | 0.700940 |
| Si | Si253 | 0.819005 | 0.928512 | 0.807029 |
| Si | Si254 | 0.710911 | 0.440546 | 0.318713 |
| Si | Si255 | 0.837621 | 0.551376 | 0.828205 |
| Si | Si256 | 0.707253 | 0.066284 | 0.301596 |
| Si | Si257 | 0.445081 | 0.822071 | 0.180614 |
| Si | Si258 | 0.096181 | 0.318861 | 0.676721 |
| Si | Si259 | 0.439548 | 0.666911 | 0.172126 |
| Si | Si260 | 0.093435 | 0.162456 | 0.691260 |
| Si | Si261 | 0.591715 | 0.163042 | 0.813563 |
| Si | Si262 | 0.944821 | 0.666896 | 0.317323 |
| Si | Si263 | 0.597393 | 0.318351 | 0.821567 |
| Si | Si264 | 0.943217 | 0.823955 | 0.309360 |
| Si | Si265 | 0.335998 | 0.864910 | 0.330865 |
| Si | Si266 | 0.211956 | 0.367645 | 0.815792 |
| Si | Si267 | 0.328375 | 0.626200 | 0.319897 |
| Si | Si268 | 0.204866 | 0.127983 | 0.838618 |
| Si | Si269 | 0.704718 | 0.123169 | 0.668439 |
| Si | Si270 | 0.827600 | 0.619496 | 0.185651 |
| Si | Si271 | 0.713744 | 0.359446 | 0.683997 |
| Si | Si272 | 0.829973 | 0.858456 | 0.167823 |
| Si | Si273 | 0.291298 | 0.818457 | 0.540293 |
| Si | Si274 | 0.251697 | 0.323126 | 0.032027 |
| Si | Si275 | 0.291648 | 0.661240 | 0.538542 |
| Si | Si276 | 0.250928 | 0.166478 | 0.049275 |
| Si | Si277 | 0.744895 | 0.170590 | 0.456897 |
| Si | Si278 | 0.785845 | 0.662961 | 0.969739 |
| Si | Si279 | 0.749150 | 0.329526 | 0.465170 |
| Si | Si280 | 0.786832 | 0.818766 | 0.951945 |
| Si | Si281 | 0.138031 | 0.818052 | 0.539398 |
| Si | Si282 | 0.404899 | 0.318517 | 0.025770 |
| Si | Si283 | 0.138127 | 0.664530 | 0.524920 |
| Si | Si284 | 0.404270 | 0.164988 | 0.037593 |
| Si | Si285 | 0.899303 | 0.168507 | 0.463351 |
| Si | Si286 | 0.633112 | 0.665597 | 0.969839 |
| Si | Si287 | 0.903485 | 0.322362 | 0.471938 |
| Si | Si288 | 0.632784 | 0.820455 | 0.954247 |
| Si | Si289 | 0.089208 | 0.868110 | 0.331284 |
| Si | Si290 | 0.450625 | 0.361768 | 0.815215 |
| Si | Si291 | 0.092418 | 0.624857 | 0.310110 |

|    |       |          |          |          |
|----|-------|----------|----------|----------|
| Si | Si292 | 0.445169 | 0.123205 | 0.819539 |
| Si | Si293 | 0.947536 | 0.115605 | 0.671773 |
| Si | Si294 | 0.586239 | 0.620578 | 0.180294 |
| Si | Si295 | 0.950731 | 0.363743 | 0.686140 |
| Si | Si296 | 0.591223 | 0.864423 | 0.171013 |
| Si | Si297 | 0.209989 | 0.826712 | 0.197216 |
| Si | Si298 | 0.333026 | 0.327353 | 0.677084 |
| Si | Si299 | 0.210399 | 0.672113 | 0.186028 |
| Si | Si300 | 0.321931 | 0.173959 | 0.702027 |
| Si | Si301 | 0.827204 | 0.157630 | 0.806598 |
| Si | Si302 | 0.832499 | 0.311721 | 0.811565 |
| Si | Si303 | 0.709564 | 0.815801 | 0.301984 |
| Zn | Zn304 | 0.717708 | 0.749456 | 0.542685 |

**M-C<sub>4</sub>H<sub>9</sub>ZnH-OH-ZnH<sup>+</sup> (Fig. 6/M4)** Total energy = -1931.69991174 eV

data\_

\_audit\_creation\_method 'Materials Studio'

\_cell\_length\_a 20.357621

\_cell\_length\_b 20.050598

\_cell\_length\_c 13.476578

\_cell\_angle\_alpha 90.000000

\_cell\_angle\_beta 90.000000

\_cell\_angle\_gamma 90.000000

\_symmetry\_space\_group\_name\_H-M 'P1'

loop\_

\_atom\_site\_type\_symbol

\_atom\_site\_label

\_atom\_site\_fract\_x

\_atom\_site\_fract\_y

\_atom\_site\_fract\_z

|   |     |          |          |          |
|---|-----|----------|----------|----------|
| H | H1  | 0.807776 | 0.779235 | 0.608041 |
| H | H2  | 0.480862 | 0.781998 | 0.740184 |
| H | H3  | 0.421745 | 0.763971 | 0.648074 |
| H | H4  | 0.471967 | 0.835631 | 0.636931 |
| H | H5  | 0.512418 | 0.745469 | 0.523243 |
| H | H6  | 0.518265 | 0.689617 | 0.623778 |
| H | H7  | 0.602178 | 0.763698 | 0.703423 |
| H | H8  | 0.596855 | 0.819064 | 0.602605 |
| H | H9  | 0.639853 | 0.672972 | 0.589346 |
| H | H10 | 0.683320 | 0.647157 | 0.468477 |
| H | H11 | 0.634876 | 0.729596 | 0.487495 |
| C | C12 | 0.471282 | 0.783271 | 0.660132 |
| C | C13 | 0.522479 | 0.742541 | 0.603344 |

|   |     |          |          |          |
|---|-----|----------|----------|----------|
| C | C14 | 0.592949 | 0.766244 | 0.623330 |
| C | C15 | 0.645580 | 0.725702 | 0.567488 |
| O | O16 | 0.518941 | 0.037191 | 0.216895 |
| O | O17 | 0.017423 | 0.544829 | 0.717816 |
| O | O18 | 0.525869 | 0.439830 | 0.216564 |
| O | O19 | 0.010744 | 0.937087 | 0.708015 |
| O | O20 | 0.512013 | 0.944897 | 0.791281 |
| O | O21 | 0.021907 | 0.456592 | 0.295555 |
| O | O22 | 0.514301 | 0.541741 | 0.793613 |
| O | O23 | 0.020556 | 0.041364 | 0.291960 |
| O | O24 | 0.402293 | 0.060760 | 0.293421 |
| O | O25 | 0.133394 | 0.556948 | 0.797811 |
| O | O26 | 0.406744 | 0.436890 | 0.293659 |
| O | O27 | 0.126267 | 0.941297 | 0.793845 |
| O | O28 | 0.625804 | 0.949319 | 0.704666 |
| O | O29 | 0.905486 | 0.433868 | 0.216976 |
| O | O30 | 0.633009 | 0.533185 | 0.724966 |
| O | O31 | 0.901990 | 0.059324 | 0.218830 |
| O | O32 | 0.438771 | 0.122875 | 0.127924 |
| O | O33 | 0.104777 | 0.626507 | 0.636366 |
| O | O34 | 0.435630 | 0.363274 | 0.135534 |
| O | O35 | 0.108527 | 0.865937 | 0.634105 |
| O | O36 | 0.608623 | 0.867111 | 0.855668 |
| O | O37 | 0.941314 | 0.371228 | 0.381237 |
| O | O38 | 0.605062 | 0.622289 | 0.864426 |
| O | O39 | 0.938038 | 0.121884 | 0.383700 |
| O | O40 | 0.411820 | 0.993766 | 0.125026 |
| O | O41 | 0.121914 | 0.495708 | 0.623866 |
| O | O42 | 0.426875 | 0.494574 | 0.118404 |
| O | O43 | 0.110104 | 0.997487 | 0.616622 |
| O | O44 | 0.613973 | 0.997550 | 0.887059 |
| O | O45 | 0.913173 | 0.500756 | 0.386091 |
| O | O46 | 0.607445 | 0.492210 | 0.909199 |
| O | O47 | 0.918130 | 0.990795 | 0.386438 |
| O | O48 | 0.339214 | 0.040503 | 0.462464 |
| O | O49 | 0.197982 | 0.540092 | 0.964486 |
| O | O50 | 0.341557 | 0.453950 | 0.460917 |
| O | O51 | 0.193880 | 0.954231 | 0.959081 |
| O | O52 | 0.695811 | 0.936180 | 0.544866 |
| O | O53 | 0.839765 | 0.424513 | 0.048246 |
| O | O54 | 0.706882 | 0.540880 | 0.568462 |
| O | O55 | 0.838054 | 0.049436 | 0.047471 |
| O | O56 | 0.336399 | 0.948739 | 0.318691 |
| O | O57 | 0.204867 | 0.448175 | 0.820155 |

|   |      |          |          |          |
|---|------|----------|----------|----------|
| 0 | 058  | 0.334214 | 0.545472 | 0.316471 |
| 0 | 059  | 0.204770 | 0.045766 | 0.815044 |
| 0 | 060  | 0.708244 | 0.046427 | 0.656163 |
| 0 | 061  | 0.855228 | 0.542320 | 0.131842 |
| 0 | 062  | 0.721545 | 0.437870 | 0.690254 |
| 0 | 063  | 0.850062 | 0.944442 | 0.165646 |
| 0 | 064  | 0.271377 | 0.061530 | 0.298574 |
| 0 | 065  | 0.263729 | 0.564304 | 0.798636 |
| 0 | 066  | 0.275974 | 0.429144 | 0.295463 |
| 0 | 067  | 0.255999 | 0.927071 | 0.790115 |
| 0 | 068  | 0.755001 | 0.931796 | 0.718573 |
| 0 | 069  | 0.775979 | 0.451102 | 0.213137 |
| 0 | 070  | 0.760041 | 0.557808 | 0.746718 |
| 0 | 071  | 0.772422 | 0.045770 | 0.215315 |
| 0 | 072  | 0.311124 | 0.122754 | 0.608956 |
| 0 | 073  | 0.226736 | 0.620383 | 0.113706 |
| 0 | 074  | 0.318826 | 0.374215 | 0.612693 |
| 0 | 075  | 0.218072 | 0.872600 | 0.108540 |
| 0 | 076  | 0.715098 | 0.869264 | 0.381598 |
| 0 | 077  | 0.803055 | 0.355981 | 0.891045 |
| 0 | 078  | 0.712022 | 0.623591 | 0.422174 |
| 0 | 079  | 0.802614 | 0.119629 | 0.891390 |
| 0 | 080  | 0.217662 | 0.045299 | 0.531642 |
| 0 | 081  | 0.318413 | 0.540967 | 0.036117 |
| 0 | 082  | 0.219900 | 0.439337 | 0.524849 |
| 0 | 083  | 0.315466 | 0.939819 | 0.021725 |
| 0 | 084  | 0.814438 | 0.934482 | 0.466170 |
| 0 | 085  | 0.722185 | 0.445691 | 0.967186 |
| 0 | 086  | 0.823501 | 0.566696 | 0.489881 |
| 0 | 087  | 0.713888 | 0.048690 | 0.987380 |
| 0 | 088  | 0.312853 | 0.992947 | 0.641032 |
| 0 | 089  | 0.220346 | 0.489994 | 0.141805 |
| 0 | 090  | 0.305900 | 0.504545 | 0.634572 |
| 0 | 091  | 0.228250 | 0.002600 | 0.134582 |
| 0 | 092  | 0.717663 | 0.002199 | 0.380593 |
| 0 | 093  | 0.830420 | 0.484561 | 0.873237 |
| 0 | 094  | 0.736484 | 0.495911 | 0.387732 |
| 0 | 095  | 0.804871 | 0.987768 | 0.880655 |
| 0 | 096  | 0.127956 | 0.128578 | 0.603381 |
| 0 | 097  | 0.406996 | 0.625573 | 0.107204 |
| 0 | 098  | 0.127598 | 0.363610 | 0.604247 |
| 0 | 099  | 0.407737 | 0.862340 | 0.099615 |
| 0 | 0100 | 0.908474 | 0.858006 | 0.389827 |
| 0 | 0101 | 0.631131 | 0.361205 | 0.900299 |



|   |      |          |          |          |
|---|------|----------|----------|----------|
| 0 | 0102 | 0.919171 | 0.633272 | 0.401839 |
| 0 | 0103 | 0.625689 | 0.128853 | 0.902549 |
| 0 | 0104 | 0.101897 | 0.057940 | 0.443218 |
| 0 | 0105 | 0.433193 | 0.555886 | 0.945886 |
| 0 | 0106 | 0.098957 | 0.439053 | 0.450609 |
| 0 | 0107 | 0.436830 | 0.941248 | 0.949690 |
| 0 | 0108 | 0.929839 | 0.923279 | 0.555336 |
| 0 | 0109 | 0.614685 | 0.420309 | 0.073479 |
| 0 | 0110 | 0.944218 | 0.559515 | 0.558193 |
| 0 | 0111 | 0.593607 | 0.056205 | 0.059704 |
| 0 | 0112 | 0.144610 | 0.063634 | 0.256522 |
| 0 | 0113 | 0.390636 | 0.559879 | 0.759426 |
| 0 | 0114 | 0.146604 | 0.422256 | 0.268485 |
| 0 | 0115 | 0.385379 | 0.926666 | 0.770004 |
| 0 | 0116 | 0.883869 | 0.949288 | 0.736741 |
| 0 | 0117 | 0.649595 | 0.453618 | 0.257861 |
| 0 | 0118 | 0.889823 | 0.558969 | 0.738285 |
| 0 | 0119 | 0.644613 | 0.059990 | 0.241595 |
| 0 | 0120 | 0.110239 | 0.948145 | 0.334058 |
| 0 | 0121 | 0.429518 | 0.445287 | 0.837512 |
| 0 | 0122 | 0.117969 | 0.543118 | 0.331961 |
| 0 | 0123 | 0.429364 | 0.044800 | 0.827673 |
| 0 | 0124 | 0.947743 | 0.041643 | 0.633344 |
| 0 | 0125 | 0.591924 | 0.541691 | 0.137538 |
| 0 | 0126 | 0.936900 | 0.447783 | 0.658100 |
| 0 | 0127 | 0.607320 | 0.944775 | 0.165018 |
| 0 | 0128 | 0.226067 | 0.134592 | 0.150965 |
| 0 | 0129 | 0.314380 | 0.635999 | 0.652834 |
| 0 | 0130 | 0.226484 | 0.357037 | 0.150964 |
| 0 | 0131 | 0.311226 | 0.860075 | 0.645656 |
| 0 | 0132 | 0.821063 | 0.859466 | 0.845019 |
| 0 | 0133 | 0.727763 | 0.368280 | 0.349240 |
| 0 | 0134 | 0.828638 | 0.617218 | 0.886761 |
| 0 | 0135 | 0.725268 | 0.131857 | 0.347387 |
| 0 | 0136 | 0.519444 | 0.850278 | 0.202396 |
| 0 | 0137 | 0.021066 | 0.354324 | 0.718516 |
| 0 | 0138 | 0.519295 | 0.640178 | 0.208523 |
| 0 | 0139 | 0.020028 | 0.138286 | 0.715043 |
| 0 | 0140 | 0.520665 | 0.136152 | 0.784298 |
| 0 | 0141 | 0.024780 | 0.631091 | 0.285540 |
| 0 | 0142 | 0.522766 | 0.356558 | 0.789337 |
| 0 | 0143 | 0.018884 | 0.859786 | 0.283238 |
| 0 | 0144 | 0.405589 | 0.837776 | 0.293146 |
| 0 | 0145 | 0.138263 | 0.335173 | 0.795971 |

|   |      |          |          |          |
|---|------|----------|----------|----------|
| 0 | 0146 | 0.407122 | 0.655039 | 0.299836 |
| 0 | 0147 | 0.136313 | 0.157414 | 0.795967 |
| 0 | 0148 | 0.638325 | 0.153159 | 0.708977 |
| 0 | 0149 | 0.910752 | 0.651724 | 0.205945 |
| 0 | 0150 | 0.638560 | 0.335804 | 0.706984 |
| 0 | 0151 | 0.904723 | 0.827718 | 0.199144 |
| 0 | 0152 | 0.443867 | 0.744719 | 0.164712 |
| 0 | 0153 | 0.089667 | 0.246242 | 0.668556 |
| 0 | 0154 | 0.589539 | 0.245289 | 0.830649 |
| 0 | 0155 | 0.961803 | 0.744917 | 0.325481 |
| 0 | 0156 | 0.334313 | 0.853008 | 0.453623 |
| 0 | 0157 | 0.207072 | 0.354278 | 0.958203 |
| 0 | 0158 | 0.334343 | 0.636784 | 0.459214 |
| 0 | 0159 | 0.206275 | 0.137071 | 0.957505 |
| 0 | 0160 | 0.702679 | 0.152457 | 0.539854 |
| 0 | 0161 | 0.820474 | 0.663214 | 0.071439 |
| 0 | 0162 | 0.707119 | 0.350278 | 0.542369 |
| 0 | 0163 | 0.835866 | 0.843837 | 0.037365 |
| 0 | 0164 | 0.274744 | 0.836770 | 0.279870 |
| 0 | 0165 | 0.269183 | 0.336559 | 0.787637 |
| 0 | 0166 | 0.277531 | 0.662093 | 0.286116 |
| 0 | 0167 | 0.267326 | 0.159594 | 0.787687 |
| 0 | 0168 | 0.769295 | 0.156387 | 0.708095 |
| 0 | 0169 | 0.787517 | 0.620473 | 0.252674 |
| 0 | 0170 | 0.769104 | 0.317305 | 0.708300 |
| 0 | 0171 | 0.773472 | 0.843616 | 0.209085 |
| 0 | 0172 | 0.296575 | 0.746384 | 0.553703 |
| 0 | 0173 | 0.244927 | 0.245390 | 0.053617 |
| 0 | 0174 | 0.743738 | 0.250022 | 0.423627 |
| 0 | 0175 | 0.797880 | 0.742616 | 0.920155 |
| 0 | 0176 | 0.211973 | 0.844673 | 0.517965 |
| 0 | 0177 | 0.328356 | 0.345374 | 0.027029 |
| 0 | 0178 | 0.213153 | 0.645501 | 0.528807 |
| 0 | 0179 | 0.327561 | 0.143534 | 0.027418 |
| 0 | 0180 | 0.824765 | 0.150567 | 0.471582 |
| 0 | 0181 | 0.712645 | 0.646638 | 0.966537 |
| 0 | 0182 | 0.828088 | 0.346688 | 0.472192 |
| 0 | 0183 | 0.715877 | 0.842254 | 0.962703 |
| 0 | 0184 | 0.131207 | 0.745823 | 0.569590 |
| 0 | 0185 | 0.408028 | 0.243716 | 0.072317 |
| 0 | 0186 | 0.909570 | 0.247237 | 0.424074 |
| 0 | 0187 | 0.631430 | 0.745690 | 0.915384 |
| 0 | 0188 | 0.092586 | 0.839025 | 0.441640 |
| 0 | 0189 | 0.445270 | 0.335164 | 0.942410 |

|    |       |          |          |          |
|----|-------|----------|----------|----------|
| O  | O190  | 0.097098 | 0.650492 | 0.443210 |
| O  | O191  | 0.442041 | 0.154467 | 0.936395 |
| O  | O192  | 0.935570 | 0.165173 | 0.571330 |
| O  | O193  | 0.596027 | 0.659866 | 0.053935 |
| O  | O194  | 0.940369 | 0.330796 | 0.568691 |
| O  | O195  | 0.597791 | 0.839449 | 0.046788 |
| O  | O196  | 0.145361 | 0.831260 | 0.260947 |
| O  | O197  | 0.397423 | 0.330144 | 0.757432 |
| O  | O198  | 0.149371 | 0.661459 | 0.262076 |
| O  | O199  | 0.395106 | 0.160204 | 0.751298 |
| O  | O200  | 0.893685 | 0.130461 | 0.752634 |
| O  | O201  | 0.647458 | 0.642366 | 0.234910 |
| O  | O202  | 0.894566 | 0.341988 | 0.753064 |
| O  | O203  | 0.645615 | 0.825886 | 0.228831 |
| O  | O204  | 0.221062 | 0.747034 | 0.162130 |
| O  | O205  | 0.318198 | 0.247783 | 0.663037 |
| O  | O206  | 0.834836 | 0.237152 | 0.827131 |
| O  | O207  | 0.728469 | 0.745305 | 0.322031 |
| Al | Al208 | 0.718955 | 0.662231 | 0.294303 |
| Si | Si209 | 0.443137 | 0.053823 | 0.190256 |
| Si | Si210 | 0.094465 | 0.555954 | 0.692933 |
| Si | Si211 | 0.448391 | 0.433857 | 0.190908 |
| Si | Si212 | 0.089138 | 0.935545 | 0.687536 |
| Si | Si213 | 0.590067 | 0.939744 | 0.811071 |
| Si | Si214 | 0.945670 | 0.440790 | 0.320386 |
| Si | Si215 | 0.590511 | 0.547493 | 0.824839 |
| Si | Si216 | 0.944302 | 0.053184 | 0.320762 |
| Si | Si217 | 0.337367 | 0.027822 | 0.343801 |
| Si | Si218 | 0.200187 | 0.527192 | 0.846096 |
| Si | Si219 | 0.339651 | 0.466354 | 0.342077 |
| Si | Si220 | 0.195276 | 0.967052 | 0.840425 |
| Si | Si221 | 0.696409 | 0.966622 | 0.655936 |
| Si | Si222 | 0.844296 | 0.463579 | 0.153548 |
| Si | Si223 | 0.705613 | 0.516919 | 0.683756 |
| Si | Si224 | 0.840543 | 0.024550 | 0.161954 |
| Si | Si225 | 0.294892 | 0.050462 | 0.561387 |
| Si | Si226 | 0.241199 | 0.548111 | 0.064801 |
| Si | Si227 | 0.296498 | 0.442798 | 0.558864 |
| Si | Si228 | 0.239000 | 0.942262 | 0.056715 |
| Si | Si229 | 0.736448 | 0.935391 | 0.441399 |
| Si | Si230 | 0.798852 | 0.427876 | 0.945098 |
| Si | Si231 | 0.747239 | 0.553094 | 0.467762 |
| Si | Si232 | 0.790177 | 0.051137 | 0.951404 |
| Si | Si233 | 0.139664 | 0.057200 | 0.549033 |

|    |       |          |          |          |
|----|-------|----------|----------|----------|
| Si | Si234 | 0.396244 | 0.554391 | 0.052404 |
| Si | Si235 | 0.142323 | 0.434684 | 0.551331 |
| Si | Si236 | 0.392840 | 0.934254 | 0.049284 |
| Si | Si237 | 0.892771 | 0.926648 | 0.448928 |
| Si | Si238 | 0.643963 | 0.429541 | 0.962257 |
| Si | Si239 | 0.900947 | 0.564671 | 0.457746 |
| Si | Si240 | 0.636964 | 0.058054 | 0.958783 |
| Si | Si241 | 0.094188 | 0.027575 | 0.331952 |
| Si | Si242 | 0.441609 | 0.525354 | 0.835040 |
| Si | Si243 | 0.096306 | 0.465088 | 0.336415 |
| Si | Si244 | 0.440656 | 0.964762 | 0.834522 |
| Si | Si245 | 0.942536 | 0.962530 | 0.658921 |
| Si | Si246 | 0.595554 | 0.464385 | 0.171176 |
| Si | Si247 | 0.946894 | 0.527621 | 0.669164 |
| Si | Si248 | 0.591286 | 0.024073 | 0.170755 |
| Si | Si249 | 0.217645 | 0.064745 | 0.209803 |
| Si | Si250 | 0.318458 | 0.565450 | 0.711116 |
| Si | Si251 | 0.217502 | 0.425288 | 0.213766 |
| Si | Si252 | 0.316220 | 0.927393 | 0.711200 |
| Si | Si253 | 0.816648 | 0.932630 | 0.794653 |
| Si | Si254 | 0.722550 | 0.441815 | 0.300161 |
| Si | Si255 | 0.827474 | 0.554227 | 0.812148 |
| Si | Si256 | 0.715313 | 0.059460 | 0.296015 |
| Si | Si257 | 0.444707 | 0.823530 | 0.189909 |
| Si | Si258 | 0.093957 | 0.324556 | 0.696923 |
| Si | Si259 | 0.444984 | 0.666519 | 0.194618 |
| Si | Si260 | 0.093268 | 0.167656 | 0.695488 |
| Si | Si261 | 0.593424 | 0.166104 | 0.806726 |
| Si | Si262 | 0.953864 | 0.665898 | 0.304228 |
| Si | Si263 | 0.595152 | 0.324344 | 0.807225 |
| Si | Si264 | 0.948571 | 0.822540 | 0.299489 |
| Si | Si265 | 0.337652 | 0.868930 | 0.336029 |
| Si | Si266 | 0.204773 | 0.368543 | 0.840114 |
| Si | Si267 | 0.338328 | 0.624711 | 0.340524 |
| Si | Si268 | 0.203627 | 0.125024 | 0.838826 |
| Si | Si269 | 0.704250 | 0.127013 | 0.653970 |
| Si | Si270 | 0.842271 | 0.619105 | 0.167155 |
| Si | Si271 | 0.708525 | 0.359914 | 0.661922 |
| Si | Si272 | 0.840530 | 0.864649 | 0.153124 |
| Si | Si273 | 0.288213 | 0.825898 | 0.542890 |
| Si | Si274 | 0.251894 | 0.325216 | 0.047699 |
| Si | Si275 | 0.289453 | 0.666567 | 0.548334 |
| Si | Si276 | 0.251457 | 0.165550 | 0.047215 |
| Si | Si277 | 0.749126 | 0.171047 | 0.445807 |

|    |       |          |          |          |
|----|-------|----------|----------|----------|
| Si | Si278 | 0.790011 | 0.667145 | 0.961125 |
| Si | Si279 | 0.751714 | 0.328374 | 0.447321 |
| Si | Si280 | 0.792504 | 0.821787 | 0.942201 |
| Si | Si281 | 0.135835 | 0.823947 | 0.540462 |
| Si | Si282 | 0.404340 | 0.322049 | 0.044031 |
| Si | Si283 | 0.136616 | 0.667165 | 0.544542 |
| Si | Si284 | 0.404123 | 0.165930 | 0.040881 |
| Si | Si285 | 0.902133 | 0.170676 | 0.462156 |
| Si | Si286 | 0.636214 | 0.668532 | 0.951207 |
| Si | Si287 | 0.904854 | 0.324069 | 0.461437 |
| Si | Si288 | 0.638598 | 0.823641 | 0.946168 |
| Si | Si289 | 0.091946 | 0.869435 | 0.329519 |
| Si | Si290 | 0.448612 | 0.366863 | 0.831463 |
| Si | Si291 | 0.097729 | 0.621484 | 0.330715 |
| Si | Si292 | 0.446576 | 0.123756 | 0.825013 |
| Si | Si293 | 0.949097 | 0.119010 | 0.668268 |
| Si | Si294 | 0.590372 | 0.621591 | 0.160700 |
| Si | Si295 | 0.948302 | 0.368622 | 0.674502 |
| Si | Si296 | 0.592825 | 0.865075 | 0.161042 |
| Si | Si297 | 0.214821 | 0.822895 | 0.203060 |
| Si | Si298 | 0.325857 | 0.323199 | 0.705091 |
| Si | Si299 | 0.218863 | 0.671641 | 0.205602 |
| Si | Si300 | 0.322986 | 0.171571 | 0.702820 |
| Si | Si301 | 0.825066 | 0.160401 | 0.793998 |
| Si | Si302 | 0.825432 | 0.313880 | 0.794398 |
| Si | Si303 | 0.716163 | 0.819997 | 0.285527 |
| Zn | Zn304 | 0.736780 | 0.756238 | 0.590111 |

**TS-C<sub>4</sub>H<sub>9</sub>ZnH-HTransfer-Concerted-ZnH<sup>+</sup> (Fig. 6/TS4)**

Total energy = -1930.55803973 eV

data\_

\_audit\_creation\_method 'Materials Studio'

\_cell\_length\_a 20.357621

\_cell\_length\_b 20.050598

\_cell\_length\_c 13.476578

\_cell\_angle\_alpha 90.000000

\_cell\_angle\_beta 90.000000

\_cell\_angle\_gamma 90.000000

\_symmetry\_space\_group\_name\_H-M 'P1'

loop\_

\_atom\_site\_type\_symbol

\_atom\_site\_label

\_atom\_site\_fract\_x  
\_atom\_site\_fract\_y  
\_atom\_site\_fract\_z

|   |     |          |          |          |
|---|-----|----------|----------|----------|
| H | H1  | 0.645977 | 0.809874 | 0.574718 |
| H | H2  | 0.645155 | 0.638679 | 0.501457 |
| H | H3  | 0.670159 | 0.761550 | 0.681808 |
| H | H4  | 0.585379 | 0.685125 | 0.650974 |
| H | H5  | 0.614128 | 0.655273 | 0.535211 |
| H | H6  | 0.562892 | 0.762088 | 0.455569 |
| H | H7  | 0.520094 | 0.779160 | 0.565774 |
| H | H8  | 0.512836 | 0.646718 | 0.450561 |
| H | H9  | 0.451195 | 0.708453 | 0.457994 |
| H | H10 | 0.472610 | 0.662361 | 0.565261 |
| H | H11 | 0.817928 | 0.742454 | 0.524355 |
| C | C12 | 0.655443 | 0.759823 | 0.603768 |
| C | C13 | 0.599681 | 0.716404 | 0.588069 |
| C | C14 | 0.543460 | 0.738715 | 0.523063 |
| C | C15 | 0.492163 | 0.685781 | 0.498007 |
| O | O16 | 0.518229 | 0.035420 | 0.213841 |
| O | O17 | 0.027583 | 0.533355 | 0.711420 |
| O | O18 | 0.517796 | 0.443936 | 0.210195 |
| O | O19 | 0.012657 | 0.930837 | 0.703100 |
| O | O20 | 0.515182 | 0.945528 | 0.785976 |
| O | O21 | 0.011221 | 0.457343 | 0.288555 |
| O | O22 | 0.520975 | 0.534778 | 0.787247 |
| O | O23 | 0.022100 | 0.044012 | 0.290234 |
| O | O24 | 0.401441 | 0.056888 | 0.289826 |
| O | O25 | 0.150838 | 0.562430 | 0.753501 |
| O | O26 | 0.390582 | 0.429429 | 0.244289 |
| O | O27 | 0.129085 | 0.944023 | 0.783978 |
| O | O28 | 0.631605 | 0.934522 | 0.705970 |
| O | O29 | 0.889148 | 0.428864 | 0.239830 |
| O | O30 | 0.647181 | 0.548203 | 0.754435 |
| O | O31 | 0.902426 | 0.038314 | 0.220688 |
| O | O32 | 0.437461 | 0.122563 | 0.128494 |
| O | O33 | 0.094685 | 0.613831 | 0.593150 |
| O | O34 | 0.447921 | 0.367163 | 0.093169 |
| O | O35 | 0.112458 | 0.860364 | 0.633875 |
| O | O36 | 0.600986 | 0.857925 | 0.857949 |
| O | O37 | 0.943407 | 0.371402 | 0.396719 |
| O | O38 | 0.589378 | 0.615487 | 0.899987 |
| O | O39 | 0.931019 | 0.122005 | 0.368555 |
| O | O40 | 0.410903 | 0.993589 | 0.118573 |
| O | O41 | 0.124132 | 0.484633 | 0.600439 |

|   |     |          |          |          |
|---|-----|----------|----------|----------|
| 0 | 042 | 0.432964 | 0.498628 | 0.086553 |
| 0 | 043 | 0.106735 | 0.990563 | 0.600813 |
| 0 | 044 | 0.621261 | 0.987224 | 0.885507 |
| 0 | 045 | 0.912151 | 0.500064 | 0.401091 |
| 0 | 046 | 0.604515 | 0.483718 | 0.916241 |
| 0 | 047 | 0.929888 | 0.991514 | 0.402573 |
| 0 | 048 | 0.339696 | 0.039550 | 0.458428 |
| 0 | 049 | 0.201920 | 0.550992 | 0.931961 |
| 0 | 050 | 0.338113 | 0.443769 | 0.422995 |
| 0 | 051 | 0.196396 | 0.949496 | 0.950507 |
| 0 | 052 | 0.697513 | 0.940521 | 0.542062 |
| 0 | 053 | 0.834141 | 0.424704 | 0.064621 |
| 0 | 054 | 0.704385 | 0.530917 | 0.582167 |
| 0 | 055 | 0.837460 | 0.034836 | 0.050408 |
| 0 | 056 | 0.339090 | 0.943370 | 0.319448 |
| 0 | 057 | 0.195055 | 0.445102 | 0.812710 |
| 0 | 058 | 0.336212 | 0.543989 | 0.292894 |
| 0 | 059 | 0.210275 | 0.045196 | 0.813128 |
| 0 | 060 | 0.705422 | 0.041244 | 0.674193 |
| 0 | 061 | 0.843246 | 0.540815 | 0.157591 |
| 0 | 062 | 0.713008 | 0.436122 | 0.718476 |
| 0 | 063 | 0.824150 | 0.935796 | 0.181409 |
| 0 | 064 | 0.270313 | 0.053902 | 0.294595 |
| 0 | 065 | 0.279355 | 0.543058 | 0.776443 |
| 0 | 066 | 0.260920 | 0.438084 | 0.267220 |
| 0 | 067 | 0.258309 | 0.925182 | 0.780830 |
| 0 | 068 | 0.762804 | 0.925764 | 0.708987 |
| 0 | 069 | 0.760447 | 0.447329 | 0.221045 |
| 0 | 070 | 0.776821 | 0.550634 | 0.741434 |
| 0 | 071 | 0.773607 | 0.054939 | 0.218514 |
| 0 | 072 | 0.311390 | 0.117911 | 0.610730 |
| 0 | 073 | 0.228472 | 0.625805 | 0.087121 |
| 0 | 074 | 0.323123 | 0.362800 | 0.574431 |
| 0 | 075 | 0.218352 | 0.871665 | 0.105254 |
| 0 | 076 | 0.717918 | 0.873839 | 0.378142 |
| 0 | 077 | 0.810958 | 0.351623 | 0.906871 |
| 0 | 078 | 0.707109 | 0.623744 | 0.447546 |
| 0 | 079 | 0.811431 | 0.110719 | 0.894457 |
| 0 | 080 | 0.220260 | 0.036637 | 0.534637 |
| 0 | 081 | 0.316909 | 0.538290 | 0.023668 |
| 0 | 082 | 0.219358 | 0.425609 | 0.499689 |
| 0 | 083 | 0.317809 | 0.934136 | 0.013641 |
| 0 | 084 | 0.814573 | 0.945728 | 0.457609 |
| 0 | 085 | 0.720738 | 0.438005 | 0.968721 |

|   |      |          |          |          |
|---|------|----------|----------|----------|
| 0 | 086  | 0.818787 | 0.563099 | 0.499748 |
| 0 | 087  | 0.714831 | 0.047438 | 0.989213 |
| 0 | 088  | 0.321093 | 0.987196 | 0.634516 |
| 0 | 089  | 0.207651 | 0.495866 | 0.108906 |
| 0 | 090  | 0.308466 | 0.493373 | 0.599399 |
| 0 | 091  | 0.233194 | 0.001795 | 0.122608 |
| 0 | 092  | 0.712036 | 0.005946 | 0.375921 |
| 0 | 093  | 0.831492 | 0.480817 | 0.887079 |
| 0 | 094  | 0.729136 | 0.496559 | 0.397132 |
| 0 | 095  | 0.798930 | 0.980103 | 0.880311 |
| 0 | 096  | 0.131321 | 0.121231 | 0.602713 |
| 0 | 097  | 0.406166 | 0.628672 | 0.078082 |
| 0 | 098  | 0.123124 | 0.353010 | 0.578115 |
| 0 | 099  | 0.412005 | 0.861971 | 0.094635 |
| 0 | 0100 | 0.904513 | 0.861085 | 0.390327 |
| 0 | 0101 | 0.625823 | 0.352934 | 0.916658 |
| 0 | 0102 | 0.917622 | 0.631867 | 0.419137 |
| 0 | 0103 | 0.623646 | 0.119454 | 0.899395 |
| 0 | 0104 | 0.109899 | 0.059554 | 0.434122 |
| 0 | 0105 | 0.422695 | 0.559568 | 0.912893 |
| 0 | 0106 | 0.099242 | 0.430118 | 0.425414 |
| 0 | 0107 | 0.440301 | 0.940700 | 0.945057 |
| 0 | 0108 | 0.920656 | 0.916789 | 0.564298 |
| 0 | 0109 | 0.617183 | 0.419022 | 0.086113 |
| 0 | 0110 | 0.937720 | 0.556521 | 0.575442 |
| 0 | 0111 | 0.592196 | 0.046431 | 0.054821 |
| 0 | 0112 | 0.145037 | 0.056023 | 0.243868 |
| 0 | 0113 | 0.402474 | 0.539088 | 0.718808 |
| 0 | 0114 | 0.132881 | 0.429752 | 0.234736 |
| 0 | 0115 | 0.388769 | 0.919372 | 0.767089 |
| 0 | 0116 | 0.889351 | 0.939878 | 0.753087 |
| 0 | 0117 | 0.637153 | 0.446967 | 0.278015 |
| 0 | 0118 | 0.905555 | 0.552987 | 0.767550 |
| 0 | 0119 | 0.643902 | 0.064893 | 0.233831 |
| 0 | 0120 | 0.106953 | 0.946111 | 0.335060 |
| 0 | 0121 | 0.436072 | 0.438840 | 0.837389 |
| 0 | 0122 | 0.107677 | 0.543910 | 0.327151 |
| 0 | 0123 | 0.426426 | 0.040872 | 0.818304 |
| 0 | 0124 | 0.942024 | 0.034715 | 0.640918 |
| 0 | 0125 | 0.598189 | 0.541476 | 0.151323 |
| 0 | 0126 | 0.936408 | 0.441599 | 0.670578 |
| 0 | 0127 | 0.609563 | 0.943388 | 0.176290 |
| 0 | 0128 | 0.228151 | 0.132118 | 0.149153 |
| 0 | 0129 | 0.321833 | 0.622594 | 0.632075 |



|   |      |          |          |          |
|---|------|----------|----------|----------|
| 0 | 0130 | 0.215104 | 0.363192 | 0.122286 |
| 0 | 0131 | 0.315281 | 0.853967 | 0.641311 |
| 0 | 0132 | 0.816815 | 0.851880 | 0.848422 |
| 0 | 0133 | 0.721478 | 0.366853 | 0.366302 |
| 0 | 0134 | 0.828256 | 0.613431 | 0.895625 |
| 0 | 0135 | 0.720133 | 0.136529 | 0.350139 |
| 0 | 0136 | 0.519020 | 0.850206 | 0.208893 |
| 0 | 0137 | 0.027724 | 0.350600 | 0.713948 |
| 0 | 0138 | 0.507029 | 0.629300 | 0.203497 |
| 0 | 0139 | 0.020697 | 0.129826 | 0.708917 |
| 0 | 0140 | 0.519136 | 0.131030 | 0.780488 |
| 0 | 0141 | 0.014391 | 0.632751 | 0.286214 |
| 0 | 0142 | 0.527263 | 0.349997 | 0.785907 |
| 0 | 0143 | 0.016874 | 0.855815 | 0.287698 |
| 0 | 0144 | 0.402514 | 0.829266 | 0.284625 |
| 0 | 0145 | 0.150857 | 0.325655 | 0.766110 |
| 0 | 0146 | 0.388495 | 0.662158 | 0.268185 |
| 0 | 0147 | 0.134843 | 0.153340 | 0.793255 |
| 0 | 0148 | 0.636905 | 0.152033 | 0.709625 |
| 0 | 0149 | 0.894062 | 0.652668 | 0.226550 |
| 0 | 0150 | 0.648096 | 0.323144 | 0.726084 |
| 0 | 0151 | 0.904024 | 0.830534 | 0.200192 |
| 0 | 0152 | 0.450951 | 0.743720 | 0.149670 |
| 0 | 0153 | 0.086927 | 0.238357 | 0.657611 |
| 0 | 0154 | 0.586288 | 0.237805 | 0.841342 |
| 0 | 0155 | 0.952952 | 0.745096 | 0.335002 |
| 0 | 0156 | 0.335922 | 0.844415 | 0.448791 |
| 0 | 0157 | 0.215752 | 0.341272 | 0.930366 |
| 0 | 0158 | 0.329921 | 0.634620 | 0.437713 |
| 0 | 0159 | 0.205880 | 0.137265 | 0.955119 |
| 0 | 0160 | 0.704367 | 0.140872 | 0.545251 |
| 0 | 0161 | 0.813007 | 0.658122 | 0.079402 |
| 0 | 0162 | 0.710601 | 0.354170 | 0.560760 |
| 0 | 0163 | 0.828895 | 0.840323 | 0.043228 |
| 0 | 0164 | 0.271969 | 0.834385 | 0.277491 |
| 0 | 0165 | 0.279830 | 0.351497 | 0.760251 |
| 0 | 0166 | 0.257965 | 0.649483 | 0.277258 |
| 0 | 0167 | 0.265292 | 0.162542 | 0.784451 |
| 0 | 0168 | 0.767304 | 0.152575 | 0.717538 |
| 0 | 0169 | 0.767392 | 0.625506 | 0.258034 |
| 0 | 0170 | 0.779682 | 0.323051 | 0.719029 |
| 0 | 0171 | 0.774364 | 0.817491 | 0.219268 |
| 0 | 0172 | 0.300631 | 0.738687 | 0.552518 |
| 0 | 0173 | 0.244644 | 0.244326 | 0.055776 |

|    |       |          |          |          |
|----|-------|----------|----------|----------|
| O  | O174  | 0.737914 | 0.249335 | 0.445572 |
| O  | O175  | 0.792124 | 0.737301 | 0.927907 |
| O  | O176  | 0.214622 | 0.836091 | 0.516782 |
| O  | O177  | 0.328507 | 0.343808 | 0.027644 |
| O  | O178  | 0.213603 | 0.640591 | 0.525434 |
| O  | O179  | 0.327599 | 0.143404 | 0.022872 |
| O  | O180  | 0.823371 | 0.149810 | 0.470475 |
| O  | O181  | 0.708572 | 0.638751 | 0.965161 |
| O  | O182  | 0.827484 | 0.344107 | 0.476449 |
| O  | O183  | 0.710701 | 0.838842 | 0.963298 |
| O  | O184  | 0.130412 | 0.739651 | 0.566742 |
| O  | O185  | 0.410268 | 0.242222 | 0.065672 |
| O  | O186  | 0.909998 | 0.245673 | 0.427521 |
| O  | O187  | 0.626185 | 0.739978 | 0.928861 |
| O  | O188  | 0.095109 | 0.835878 | 0.441005 |
| O  | O189  | 0.431220 | 0.317633 | 0.911000 |
| O  | O190  | 0.109930 | 0.663345 | 0.411320 |
| O  | O191  | 0.443089 | 0.146640 | 0.935750 |
| O  | O192  | 0.938287 | 0.154070 | 0.561393 |
| O  | O193  | 0.605222 | 0.663710 | 0.083471 |
| O  | O194  | 0.936059 | 0.324010 | 0.580443 |
| O  | O195  | 0.595079 | 0.840874 | 0.051873 |
| O  | O196  | 0.142835 | 0.831350 | 0.256264 |
| O  | O197  | 0.406018 | 0.335925 | 0.720138 |
| O  | O198  | 0.134389 | 0.651374 | 0.218984 |
| O  | O199  | 0.393704 | 0.159621 | 0.752923 |
| O  | O200  | 0.894400 | 0.134191 | 0.746752 |
| O  | O201  | 0.626605 | 0.642043 | 0.275904 |
| O  | O202  | 0.905030 | 0.333015 | 0.771599 |
| O  | O203  | 0.645086 | 0.822918 | 0.232560 |
| O  | O204  | 0.216596 | 0.746208 | 0.157632 |
| O  | O205  | 0.319690 | 0.245141 | 0.656682 |
| O  | O206  | 0.832817 | 0.232687 | 0.837688 |
| O  | O207  | 0.711701 | 0.744734 | 0.354826 |
| Al | Al208 | 0.703230 | 0.659752 | 0.324568 |
| Si | Si209 | 0.442467 | 0.052091 | 0.186877 |
| Si | Si210 | 0.099209 | 0.548476 | 0.664091 |
| Si | Si211 | 0.446489 | 0.435186 | 0.158756 |
| Si | Si212 | 0.090624 | 0.931644 | 0.680104 |
| Si | Si213 | 0.591868 | 0.931655 | 0.810130 |
| Si | Si214 | 0.938976 | 0.439606 | 0.331935 |
| Si | Si215 | 0.591573 | 0.545119 | 0.840576 |
| Si | Si216 | 0.945473 | 0.049054 | 0.320795 |
| Si | Si217 | 0.337422 | 0.023095 | 0.340933 |

|    |       |          |          |          |
|----|-------|----------|----------|----------|
| Si | Si218 | 0.206782 | 0.525044 | 0.818672 |
| Si | Si219 | 0.331598 | 0.463695 | 0.306923 |
| Si | Si220 | 0.198620 | 0.965945 | 0.832781 |
| Si | Si221 | 0.699622 | 0.961405 | 0.657855 |
| Si | Si222 | 0.831851 | 0.461491 | 0.171658 |
| Si | Si223 | 0.710527 | 0.516047 | 0.699561 |
| Si | Si224 | 0.834521 | 0.015749 | 0.167518 |
| Si | Si225 | 0.297716 | 0.045911 | 0.560168 |
| Si | Si226 | 0.239011 | 0.552844 | 0.038169 |
| Si | Si227 | 0.297154 | 0.431344 | 0.524426 |
| Si | Si228 | 0.241384 | 0.938956 | 0.048685 |
| Si | Si229 | 0.736263 | 0.941277 | 0.436941 |
| Si | Si230 | 0.798986 | 0.423974 | 0.957075 |
| Si | Si231 | 0.740985 | 0.552859 | 0.480504 |
| Si | Si232 | 0.791094 | 0.043565 | 0.953219 |
| Si | Si233 | 0.142218 | 0.051856 | 0.543288 |
| Si | Si234 | 0.394620 | 0.556478 | 0.025612 |
| Si | Si235 | 0.141721 | 0.423636 | 0.526200 |
| Si | Si236 | 0.395072 | 0.932818 | 0.043299 |
| Si | Si237 | 0.892370 | 0.928666 | 0.453215 |
| Si | Si238 | 0.642466 | 0.423118 | 0.972160 |
| Si | Si239 | 0.896553 | 0.562915 | 0.473181 |
| Si | Si240 | 0.638100 | 0.050125 | 0.956733 |
| Si | Si241 | 0.095669 | 0.026049 | 0.326386 |
| Si | Si242 | 0.445306 | 0.517984 | 0.815113 |
| Si | Si243 | 0.087850 | 0.465432 | 0.318490 |
| Si | Si244 | 0.442602 | 0.961839 | 0.828815 |
| Si | Si245 | 0.941224 | 0.955572 | 0.665502 |
| Si | Si246 | 0.592860 | 0.463251 | 0.180964 |
| Si | Si247 | 0.951395 | 0.521026 | 0.681561 |
| Si | Si248 | 0.591196 | 0.022276 | 0.170091 |
| Si | Si249 | 0.219277 | 0.060340 | 0.202560 |
| Si | Si250 | 0.327656 | 0.549087 | 0.681191 |
| Si | Si251 | 0.204534 | 0.432020 | 0.182656 |
| Si | Si252 | 0.320464 | 0.922040 | 0.705559 |
| Si | Si253 | 0.817239 | 0.924938 | 0.797301 |
| Si | Si254 | 0.712248 | 0.439662 | 0.315761 |
| Si | Si255 | 0.835352 | 0.549372 | 0.823809 |
| Si | Si256 | 0.712635 | 0.065216 | 0.294235 |
| Si | Si257 | 0.446376 | 0.820887 | 0.184467 |
| Si | Si258 | 0.096802 | 0.317165 | 0.678843 |
| Si | Si259 | 0.438765 | 0.665488 | 0.174329 |
| Si | Si260 | 0.093207 | 0.161039 | 0.690692 |
| Si | Si261 | 0.591352 | 0.160429 | 0.807652 |

|    |       |          |          |          |
|----|-------|----------|----------|----------|
| Si | Si262 | 0.944230 | 0.665670 | 0.316784 |
| Si | Si263 | 0.596845 | 0.316332 | 0.817991 |
| Si | Si264 | 0.944837 | 0.822409 | 0.303382 |
| Si | Si265 | 0.337169 | 0.863081 | 0.331922 |
| Si | Si266 | 0.210807 | 0.366000 | 0.816928 |
| Si | Si267 | 0.327974 | 0.622418 | 0.318940 |
| Si | Si268 | 0.203737 | 0.124475 | 0.836410 |
| Si | Si269 | 0.703533 | 0.121679 | 0.661769 |
| Si | Si270 | 0.827495 | 0.618968 | 0.182746 |
| Si | Si271 | 0.712771 | 0.359051 | 0.680729 |
| Si | Si272 | 0.832826 | 0.856125 | 0.160937 |
| Si | Si273 | 0.291124 | 0.818149 | 0.540198 |
| Si | Si274 | 0.251243 | 0.323042 | 0.033984 |
| Si | Si275 | 0.290924 | 0.659594 | 0.536130 |
| Si | Si276 | 0.251601 | 0.164635 | 0.045244 |
| Si | Si277 | 0.746640 | 0.169506 | 0.452493 |
| Si | Si278 | 0.785652 | 0.661365 | 0.967619 |
| Si | Si279 | 0.749587 | 0.328150 | 0.462537 |
| Si | Si280 | 0.787191 | 0.816621 | 0.946971 |
| Si | Si281 | 0.137818 | 0.818067 | 0.539189 |
| Si | Si282 | 0.404400 | 0.317953 | 0.024510 |
| Si | Si283 | 0.137032 | 0.664227 | 0.524294 |
| Si | Si284 | 0.404562 | 0.163738 | 0.037993 |
| Si | Si285 | 0.900951 | 0.167586 | 0.456803 |
| Si | Si286 | 0.632528 | 0.664210 | 0.970828 |
| Si | Si287 | 0.904192 | 0.321327 | 0.470091 |
| Si | Si288 | 0.633431 | 0.819049 | 0.951546 |
| Si | Si289 | 0.090610 | 0.867107 | 0.329786 |
| Si | Si290 | 0.450312 | 0.360802 | 0.813155 |
| Si | Si291 | 0.091315 | 0.622583 | 0.310933 |
| Si | Si292 | 0.445233 | 0.119559 | 0.822240 |
| Si | Si293 | 0.948421 | 0.113561 | 0.664525 |
| Si | Si294 | 0.585369 | 0.619475 | 0.181295 |
| Si | Si295 | 0.951303 | 0.362539 | 0.684036 |
| Si | Si296 | 0.592596 | 0.864305 | 0.167245 |
| Si | Si297 | 0.212426 | 0.821806 | 0.199409 |
| Si | Si298 | 0.332024 | 0.323595 | 0.678613 |
| Si | Si299 | 0.209203 | 0.668022 | 0.185263 |
| Si | Si300 | 0.322553 | 0.170103 | 0.700963 |
| Si | Si301 | 0.826311 | 0.156844 | 0.798612 |
| Si | Si302 | 0.832328 | 0.310797 | 0.808535 |
| Si | Si303 | 0.712597 | 0.814628 | 0.296194 |
| Zn | Zn304 | 0.743049 | 0.742862 | 0.535355 |

**C<sub>4</sub>H<sub>8</sub>-Phys.Ads-H<sub>2</sub>-Phys.Ads-ZnH<sup>+</sup> (Fig. 6/M5)**

Total energy = -1932.30596876 eV

data\_

\_audit\_creation\_method 'Materials Studio'

\_cell\_length\_a 20.357621

\_cell\_length\_b 20.050598

\_cell\_length\_c 13.476578

\_cell\_angle\_alpha 90.000000

\_cell\_angle\_beta 90.000000

\_cell\_angle\_gamma 90.000000

\_symmetry\_space\_group\_name\_H-M 'P1'

loop\_

\_atom\_site\_type\_symbol

\_atom\_site\_label

\_atom\_site\_fract\_x

\_atom\_site\_fract\_y

\_atom\_site\_fract\_z

|   |     |          |          |          |
|---|-----|----------|----------|----------|
| H | H1  | 0.556269 | 0.818868 | 0.589307 |
| H | H2  | 0.667122 | 0.693679 | 0.696428 |
| H | H3  | 0.510313 | 0.809402 | 0.706908 |
| H | H4  | 0.449878 | 0.715447 | 0.640555 |
| H | H5  | 0.634662 | 0.707742 | 0.683708 |
| H | H6  | 0.533069 | 0.739509 | 0.451717 |
| H | H7  | 0.449141 | 0.718447 | 0.450095 |
| H | H8  | 0.559532 | 0.628300 | 0.529618 |
| H | H9  | 0.513920 | 0.616503 | 0.418989 |
| H | H10 | 0.474966 | 0.608905 | 0.536211 |
| H | H11 | 0.782356 | 0.753145 | 0.581359 |
| C | C12 | 0.519297 | 0.792069 | 0.631895 |
| C | C13 | 0.486309 | 0.740399 | 0.594084 |
| C | C14 | 0.494964 | 0.711698 | 0.491984 |
| C | C15 | 0.511838 | 0.636900 | 0.494144 |
| O | O16 | 0.517160 | 0.032155 | 0.215197 |
| O | O17 | 0.028309 | 0.529264 | 0.710436 |
| O | O18 | 0.518050 | 0.442232 | 0.204112 |
| O | O19 | 0.015228 | 0.934898 | 0.706128 |
| O | O20 | 0.521397 | 0.950316 | 0.787833 |
| O | O21 | 0.010879 | 0.452638 | 0.280733 |
| O | O22 | 0.520513 | 0.538508 | 0.786675 |
| O | O23 | 0.023683 | 0.045183 | 0.295069 |
| O | O24 | 0.399477 | 0.059116 | 0.285292 |
| O | O25 | 0.152104 | 0.555090 | 0.750975 |
| O | O26 | 0.390338 | 0.429362 | 0.234690 |

|   |     |          |          |          |
|---|-----|----------|----------|----------|
| 0 | 027 | 0.135649 | 0.942702 | 0.774422 |
| 0 | 028 | 0.639170 | 0.925779 | 0.715548 |
| 0 | 029 | 0.887937 | 0.422985 | 0.235883 |
| 0 | 030 | 0.647900 | 0.550715 | 0.754975 |
| 0 | 031 | 0.902236 | 0.033395 | 0.233875 |
| 0 | 032 | 0.441643 | 0.122083 | 0.125629 |
| 0 | 033 | 0.096108 | 0.610693 | 0.594261 |
| 0 | 034 | 0.448859 | 0.366984 | 0.084875 |
| 0 | 035 | 0.107298 | 0.858525 | 0.628191 |
| 0 | 036 | 0.598929 | 0.863003 | 0.876786 |
| 0 | 037 | 0.943785 | 0.367696 | 0.392575 |
| 0 | 038 | 0.590660 | 0.617032 | 0.901892 |
| 0 | 039 | 0.931758 | 0.118987 | 0.378324 |
| 0 | 040 | 0.409769 | 0.994019 | 0.115969 |
| 0 | 041 | 0.123219 | 0.480855 | 0.595383 |
| 0 | 042 | 0.435299 | 0.498490 | 0.078500 |
| 0 | 043 | 0.106605 | 0.988847 | 0.592938 |
| 0 | 044 | 0.629601 | 0.992079 | 0.882703 |
| 0 | 045 | 0.913296 | 0.496701 | 0.393395 |
| 0 | 046 | 0.603113 | 0.485305 | 0.914053 |
| 0 | 047 | 0.937303 | 0.988474 | 0.413174 |
| 0 | 048 | 0.340510 | 0.044146 | 0.455982 |
| 0 | 049 | 0.207456 | 0.557854 | 0.925227 |
| 0 | 050 | 0.335767 | 0.436282 | 0.412092 |
| 0 | 051 | 0.199611 | 0.946688 | 0.944349 |
| 0 | 052 | 0.702945 | 0.927623 | 0.548441 |
| 0 | 053 | 0.832330 | 0.423445 | 0.061410 |
| 0 | 054 | 0.700297 | 0.536462 | 0.577316 |
| 0 | 055 | 0.837889 | 0.039355 | 0.064959 |
| 0 | 056 | 0.345559 | 0.942871 | 0.325772 |
| 0 | 057 | 0.196518 | 0.441907 | 0.830937 |
| 0 | 058 | 0.336987 | 0.542397 | 0.294282 |
| 0 | 059 | 0.212941 | 0.045609 | 0.813130 |
| 0 | 060 | 0.691329 | 0.039771 | 0.652573 |
| 0 | 061 | 0.850099 | 0.538388 | 0.156756 |
| 0 | 062 | 0.701331 | 0.435463 | 0.705387 |
| 0 | 063 | 0.821821 | 0.934609 | 0.184482 |
| 0 | 064 | 0.268709 | 0.047184 | 0.293578 |
| 0 | 065 | 0.280391 | 0.533312 | 0.767667 |
| 0 | 066 | 0.260835 | 0.438995 | 0.253599 |
| 0 | 067 | 0.265386 | 0.927767 | 0.777399 |
| 0 | 068 | 0.769816 | 0.943130 | 0.714020 |
| 0 | 069 | 0.760601 | 0.451290 | 0.218280 |
| 0 | 070 | 0.777236 | 0.541306 | 0.732415 |

|   |      |          |          |          |
|---|------|----------|----------|----------|
| 0 | 071  | 0.773451 | 0.052060 | 0.234577 |
| 0 | 072  | 0.312285 | 0.117649 | 0.612717 |
| 0 | 073  | 0.226979 | 0.628036 | 0.086819 |
| 0 | 074  | 0.324007 | 0.359852 | 0.567637 |
| 0 | 075  | 0.219152 | 0.868792 | 0.098823 |
| 0 | 076  | 0.729690 | 0.867473 | 0.381448 |
| 0 | 077  | 0.811213 | 0.354296 | 0.899910 |
| 0 | 078  | 0.723417 | 0.627649 | 0.439693 |
| 0 | 079  | 0.818706 | 0.114768 | 0.907864 |
| 0 | 080  | 0.223533 | 0.032797 | 0.540150 |
| 0 | 081  | 0.316992 | 0.539382 | 0.028771 |
| 0 | 082  | 0.218572 | 0.421259 | 0.495781 |
| 0 | 083  | 0.320725 | 0.929328 | 0.009767 |
| 0 | 084  | 0.817226 | 0.950679 | 0.458759 |
| 0 | 085  | 0.721140 | 0.441395 | 0.960846 |
| 0 | 086  | 0.820613 | 0.551311 | 0.503710 |
| 0 | 087  | 0.717499 | 0.053301 | 0.995371 |
| 0 | 088  | 0.329514 | 0.986492 | 0.629599 |
| 0 | 089  | 0.203352 | 0.498181 | 0.099703 |
| 0 | 090  | 0.310576 | 0.491387 | 0.586289 |
| 0 | 091  | 0.236987 | 0.998882 | 0.116502 |
| 0 | 092  | 0.706538 | 0.997898 | 0.383626 |
| 0 | 093  | 0.834052 | 0.484840 | 0.888488 |
| 0 | 094  | 0.724793 | 0.499942 | 0.392587 |
| 0 | 095  | 0.804548 | 0.983736 | 0.893911 |
| 0 | 096  | 0.134032 | 0.119022 | 0.601998 |
| 0 | 097  | 0.409209 | 0.628514 | 0.072147 |
| 0 | 098  | 0.118997 | 0.350115 | 0.569594 |
| 0 | 099  | 0.418621 | 0.862713 | 0.091706 |
| 0 | 0100 | 0.903948 | 0.859846 | 0.400978 |
| 0 | 0101 | 0.627501 | 0.355133 | 0.911080 |
| 0 | 0102 | 0.912245 | 0.627777 | 0.418637 |
| 0 | 0103 | 0.618930 | 0.121748 | 0.916751 |
| 0 | 0104 | 0.118474 | 0.060354 | 0.429326 |
| 0 | 0105 | 0.417565 | 0.559116 | 0.905640 |
| 0 | 0106 | 0.099695 | 0.428824 | 0.417797 |
| 0 | 0107 | 0.443223 | 0.942747 | 0.942890 |
| 0 | 0108 | 0.918136 | 0.917209 | 0.575616 |
| 0 | 0109 | 0.619410 | 0.419400 | 0.081761 |
| 0 | 0110 | 0.942031 | 0.549017 | 0.569397 |
| 0 | 0111 | 0.595542 | 0.036367 | 0.060404 |
| 0 | 0112 | 0.144861 | 0.046163 | 0.236688 |
| 0 | 0113 | 0.403463 | 0.533346 | 0.711375 |
| 0 | 0114 | 0.132666 | 0.429068 | 0.226622 |

|   |      |          |          |          |
|---|------|----------|----------|----------|
| 0 | 0115 | 0.395752 | 0.918106 | 0.763188 |
| 0 | 0116 | 0.894314 | 0.939574 | 0.767415 |
| 0 | 0117 | 0.636887 | 0.444780 | 0.274039 |
| 0 | 0118 | 0.905029 | 0.553730 | 0.759853 |
| 0 | 0119 | 0.643042 | 0.061240 | 0.240758 |
| 0 | 0120 | 0.102825 | 0.943625 | 0.343294 |
| 0 | 0121 | 0.439916 | 0.438293 | 0.836586 |
| 0 | 0122 | 0.104595 | 0.542543 | 0.319870 |
| 0 | 0123 | 0.427756 | 0.041154 | 0.813315 |
| 0 | 0124 | 0.938123 | 0.036383 | 0.650610 |
| 0 | 0125 | 0.597973 | 0.540808 | 0.149755 |
| 0 | 0126 | 0.935227 | 0.438192 | 0.676211 |
| 0 | 0127 | 0.608933 | 0.938708 | 0.191434 |
| 0 | 0128 | 0.227794 | 0.127918 | 0.150104 |
| 0 | 0129 | 0.322084 | 0.618830 | 0.629911 |
| 0 | 0130 | 0.212991 | 0.365711 | 0.107179 |
| 0 | 0131 | 0.319591 | 0.853266 | 0.639763 |
| 0 | 0132 | 0.810368 | 0.856292 | 0.849439 |
| 0 | 0133 | 0.724713 | 0.368960 | 0.362299 |
| 0 | 0134 | 0.822609 | 0.617595 | 0.875941 |
| 0 | 0135 | 0.714896 | 0.129649 | 0.365867 |
| 0 | 0136 | 0.516836 | 0.846366 | 0.220546 |
| 0 | 0137 | 0.027875 | 0.347256 | 0.713081 |
| 0 | 0138 | 0.506479 | 0.628292 | 0.203916 |
| 0 | 0139 | 0.024235 | 0.127486 | 0.709334 |
| 0 | 0140 | 0.522527 | 0.130544 | 0.782483 |
| 0 | 0141 | 0.012071 | 0.633448 | 0.288612 |
| 0 | 0142 | 0.528440 | 0.348485 | 0.781148 |
| 0 | 0143 | 0.013927 | 0.852638 | 0.292628 |
| 0 | 0144 | 0.395083 | 0.824989 | 0.277161 |
| 0 | 0145 | 0.152675 | 0.328122 | 0.756621 |
| 0 | 0146 | 0.386238 | 0.660704 | 0.261982 |
| 0 | 0147 | 0.138962 | 0.153952 | 0.791620 |
| 0 | 0148 | 0.644492 | 0.151901 | 0.728499 |
| 0 | 0149 | 0.891502 | 0.653875 | 0.227249 |
| 0 | 0150 | 0.649190 | 0.317146 | 0.723607 |
| 0 | 0151 | 0.899647 | 0.829111 | 0.209388 |
| 0 | 0152 | 0.451359 | 0.742577 | 0.146884 |
| 0 | 0153 | 0.088772 | 0.236307 | 0.655217 |
| 0 | 0154 | 0.585665 | 0.238548 | 0.847829 |
| 0 | 0155 | 0.947515 | 0.743246 | 0.343287 |
| 0 | 0156 | 0.334222 | 0.839758 | 0.446558 |
| 0 | 0157 | 0.219077 | 0.325985 | 0.920397 |
| 0 | 0158 | 0.331273 | 0.635940 | 0.435759 |



|   |      |          |          |          |
|---|------|----------|----------|----------|
| 0 | 0159 | 0.207734 | 0.137931 | 0.956042 |
| 0 | 0160 | 0.705977 | 0.154804 | 0.559178 |
| 0 | 0161 | 0.824132 | 0.652074 | 0.064613 |
| 0 | 0162 | 0.707806 | 0.349374 | 0.553833 |
| 0 | 0163 | 0.832573 | 0.841494 | 0.042603 |
| 0 | 0164 | 0.265531 | 0.843527 | 0.279816 |
| 0 | 0165 | 0.280869 | 0.356040 | 0.753194 |
| 0 | 0166 | 0.256068 | 0.645496 | 0.278272 |
| 0 | 0167 | 0.270074 | 0.162190 | 0.788340 |
| 0 | 0168 | 0.773365 | 0.130124 | 0.724218 |
| 0 | 0169 | 0.763967 | 0.623654 | 0.234694 |
| 0 | 0170 | 0.780133 | 0.329975 | 0.711353 |
| 0 | 0171 | 0.769141 | 0.815887 | 0.208872 |
| 0 | 0172 | 0.299903 | 0.736487 | 0.556733 |
| 0 | 0173 | 0.246396 | 0.242466 | 0.064975 |
| 0 | 0174 | 0.741224 | 0.248927 | 0.433107 |
| 0 | 0175 | 0.792311 | 0.739849 | 0.927899 |
| 0 | 0176 | 0.215101 | 0.834976 | 0.523543 |
| 0 | 0177 | 0.328819 | 0.341578 | 0.023176 |
| 0 | 0178 | 0.214431 | 0.638000 | 0.522831 |
| 0 | 0179 | 0.328898 | 0.141896 | 0.026954 |
| 0 | 0180 | 0.822481 | 0.147963 | 0.475235 |
| 0 | 0181 | 0.709836 | 0.641048 | 0.969846 |
| 0 | 0182 | 0.827892 | 0.343969 | 0.476412 |
| 0 | 0183 | 0.710814 | 0.839646 | 0.975097 |
| 0 | 0184 | 0.131446 | 0.736489 | 0.567830 |
| 0 | 0185 | 0.412022 | 0.241628 | 0.062200 |
| 0 | 0186 | 0.908556 | 0.243311 | 0.429276 |
| 0 | 0187 | 0.626735 | 0.741694 | 0.933840 |
| 0 | 0188 | 0.099084 | 0.828117 | 0.435642 |
| 0 | 0189 | 0.430848 | 0.315755 | 0.904588 |
| 0 | 0190 | 0.108978 | 0.659608 | 0.412552 |
| 0 | 0191 | 0.442624 | 0.145501 | 0.933402 |
| 0 | 0192 | 0.936624 | 0.155386 | 0.569217 |
| 0 | 0193 | 0.605508 | 0.663876 | 0.086021 |
| 0 | 0194 | 0.937482 | 0.323745 | 0.577610 |
| 0 | 0195 | 0.596698 | 0.835641 | 0.067649 |
| 0 | 0196 | 0.138146 | 0.834531 | 0.246171 |
| 0 | 0197 | 0.407055 | 0.338157 | 0.714699 |
| 0 | 0198 | 0.132568 | 0.652865 | 0.219632 |
| 0 | 0199 | 0.397897 | 0.160855 | 0.748749 |
| 0 | 0200 | 0.900378 | 0.140571 | 0.758573 |
| 0 | 0201 | 0.626104 | 0.639234 | 0.277540 |
| 0 | 0202 | 0.904741 | 0.325563 | 0.768108 |

|    |       |          |          |          |
|----|-------|----------|----------|----------|
| O  | O203  | 0.641973 | 0.818910 | 0.251695 |
| O  | O204  | 0.218245 | 0.746606 | 0.164951 |
| O  | O205  | 0.320066 | 0.245386 | 0.658021 |
| O  | O206  | 0.820167 | 0.233133 | 0.829040 |
| O  | O207  | 0.720737 | 0.739239 | 0.351416 |
| Al | Al208 | 0.705348 | 0.654073 | 0.314411 |
| Si | Si209 | 0.442576 | 0.051655 | 0.184741 |
| Si | Si210 | 0.099840 | 0.543890 | 0.662100 |
| Si | Si211 | 0.447225 | 0.434741 | 0.150837 |
| Si | Si212 | 0.091936 | 0.931359 | 0.675272 |
| Si | Si213 | 0.596695 | 0.932913 | 0.816818 |
| Si | Si214 | 0.939183 | 0.434945 | 0.325885 |
| Si | Si215 | 0.591355 | 0.547838 | 0.839665 |
| Si | Si216 | 0.947838 | 0.046691 | 0.330343 |
| Si | Si217 | 0.338296 | 0.022897 | 0.340320 |
| Si | Si218 | 0.209095 | 0.521526 | 0.818179 |
| Si | Si219 | 0.331065 | 0.461827 | 0.298504 |
| Si | Si220 | 0.203429 | 0.965634 | 0.827516 |
| Si | Si221 | 0.700941 | 0.959595 | 0.658822 |
| Si | Si222 | 0.832711 | 0.459939 | 0.168553 |
| Si | Si223 | 0.706542 | 0.515749 | 0.693194 |
| Si | Si224 | 0.833836 | 0.014804 | 0.179352 |
| Si | Si225 | 0.301189 | 0.045809 | 0.560343 |
| Si | Si226 | 0.239018 | 0.556057 | 0.035326 |
| Si | Si227 | 0.296993 | 0.427318 | 0.515945 |
| Si | Si228 | 0.244057 | 0.935657 | 0.042906 |
| Si | Si229 | 0.739406 | 0.936089 | 0.442530 |
| Si | Si230 | 0.799327 | 0.425978 | 0.952434 |
| Si | Si231 | 0.742561 | 0.552680 | 0.478656 |
| Si | Si232 | 0.794690 | 0.047995 | 0.964755 |
| Si | Si233 | 0.145793 | 0.050276 | 0.541275 |
| Si | Si234 | 0.394827 | 0.556524 | 0.021058 |
| Si | Si235 | 0.140596 | 0.420525 | 0.519661 |
| Si | Si236 | 0.397840 | 0.932380 | 0.040345 |
| Si | Si237 | 0.894092 | 0.928870 | 0.462190 |
| Si | Si238 | 0.643071 | 0.425143 | 0.967164 |
| Si | Si239 | 0.897282 | 0.556119 | 0.470801 |
| Si | Si240 | 0.640599 | 0.050799 | 0.963855 |
| Si | Si241 | 0.097310 | 0.023566 | 0.326607 |
| Si | Si242 | 0.445388 | 0.517399 | 0.810868 |
| Si | Si243 | 0.087212 | 0.463535 | 0.310805 |
| Si | Si244 | 0.447031 | 0.962950 | 0.826362 |
| Si | Si245 | 0.941736 | 0.957121 | 0.674800 |
| Si | Si246 | 0.593195 | 0.462164 | 0.176837 |

|    |       |          |          |          |
|----|-------|----------|----------|----------|
| Si | Si247 | 0.952227 | 0.517442 | 0.679532 |
| Si | Si248 | 0.591214 | 0.017229 | 0.177345 |
| Si | Si249 | 0.219763 | 0.054650 | 0.199238 |
| Si | Si250 | 0.328754 | 0.543775 | 0.673463 |
| Si | Si251 | 0.203148 | 0.433107 | 0.171223 |
| Si | Si252 | 0.327272 | 0.921857 | 0.701948 |
| Si | Si253 | 0.819598 | 0.930989 | 0.806001 |
| Si | Si254 | 0.712054 | 0.441131 | 0.312082 |
| Si | Si255 | 0.834434 | 0.549201 | 0.815425 |
| Si | Si256 | 0.709840 | 0.059866 | 0.306066 |
| Si | Si257 | 0.445446 | 0.819008 | 0.184369 |
| Si | Si258 | 0.096818 | 0.315607 | 0.673601 |
| Si | Si259 | 0.438767 | 0.664458 | 0.171133 |
| Si | Si260 | 0.096315 | 0.159409 | 0.689715 |
| Si | Si261 | 0.592828 | 0.160623 | 0.818624 |
| Si | Si262 | 0.941067 | 0.664232 | 0.318979 |
| Si | Si263 | 0.597677 | 0.315422 | 0.816039 |
| Si | Si264 | 0.941695 | 0.820901 | 0.311381 |
| Si | Si265 | 0.334950 | 0.862979 | 0.331800 |
| Si | Si266 | 0.212568 | 0.363378 | 0.814777 |
| Si | Si267 | 0.327689 | 0.621003 | 0.317645 |
| Si | Si268 | 0.207062 | 0.124759 | 0.837335 |
| Si | Si269 | 0.704083 | 0.118938 | 0.666658 |
| Si | Si270 | 0.830403 | 0.616690 | 0.172456 |
| Si | Si271 | 0.709454 | 0.357896 | 0.673405 |
| Si | Si272 | 0.831447 | 0.855638 | 0.161006 |
| Si | Si273 | 0.292059 | 0.815994 | 0.541982 |
| Si | Si274 | 0.251961 | 0.319134 | 0.029226 |
| Si | Si275 | 0.291589 | 0.657789 | 0.535322 |
| Si | Si276 | 0.252754 | 0.162908 | 0.048698 |
| Si | Si277 | 0.746293 | 0.170281 | 0.458111 |
| Si | Si278 | 0.786962 | 0.662285 | 0.960181 |
| Si | Si279 | 0.750521 | 0.327330 | 0.457068 |
| Si | Si280 | 0.786518 | 0.818751 | 0.949549 |
| Si | Si281 | 0.138194 | 0.814811 | 0.538662 |
| Si | Si282 | 0.405046 | 0.316651 | 0.018715 |
| Si | Si283 | 0.137772 | 0.661174 | 0.524560 |
| Si | Si284 | 0.406071 | 0.162832 | 0.036890 |
| Si | Si285 | 0.900109 | 0.166062 | 0.463229 |
| Si | Si286 | 0.633342 | 0.665472 | 0.973496 |
| Si | Si287 | 0.904205 | 0.319744 | 0.468662 |
| Si | Si288 | 0.633491 | 0.819620 | 0.963637 |
| Si | Si289 | 0.088884 | 0.864704 | 0.329321 |
| Si | Si290 | 0.451702 | 0.360416 | 0.808855 |

|    |       |          |          |          |
|----|-------|----------|----------|----------|
| Si | Si291 | 0.089449 | 0.621849 | 0.310161 |
| Si | Si292 | 0.447479 | 0.119510 | 0.819765 |
| Si | Si293 | 0.949520 | 0.115068 | 0.671949 |
| Si | Si294 | 0.584689 | 0.618242 | 0.181611 |
| Si | Si295 | 0.951337 | 0.359013 | 0.683858 |
| Si | Si296 | 0.591074 | 0.859982 | 0.181961 |
| Si | Si297 | 0.210382 | 0.823787 | 0.197786 |
| Si | Si298 | 0.333044 | 0.324279 | 0.674519 |
| Si | Si299 | 0.208179 | 0.668068 | 0.187341 |
| Si | Si300 | 0.325148 | 0.170351 | 0.701645 |
| Si | Si301 | 0.828011 | 0.154655 | 0.804255 |
| Si | Si302 | 0.829471 | 0.311134 | 0.802324 |
| Si | Si303 | 0.715149 | 0.812054 | 0.297503 |
| Zn | Zn304 | 0.751747 | 0.718307 | 0.493704 |

**C<sub>4</sub>H<sub>8</sub>-Phys.Ads-ZnOH<sup>+</sup> (Fig. 8/M1 in Blue)** Total energy = -1930.84961895 eV

data\_

\_audit\_creation\_method 'Materials Studio'

\_cell\_length\_a 20.357621

\_cell\_length\_b 20.050598

\_cell\_length\_c 13.476578

\_cell\_angle\_alpha 90.000000

\_cell\_angle\_beta 90.000000

\_cell\_angle\_gamma 90.000000

\_symmetry\_space\_group\_name\_H-M 'P1'

loop\_

\_atom\_site\_type\_symbol

\_atom\_site\_label

\_atom\_site\_fract\_x

\_atom\_site\_fract\_y

\_atom\_site\_fract\_z

|   |     |          |          |          |
|---|-----|----------|----------|----------|
| H | H1  | 0.815012 | 0.760014 | 0.616418 |
| H | H2  | 0.653950 | 0.813750 | 0.596080 |
| H | H3  | 0.679066 | 0.745941 | 0.681443 |
| H | H4  | 0.593225 | 0.673758 | 0.616658 |
| H | H5  | 0.566988 | 0.781053 | 0.460390 |
| H | H6  | 0.511932 | 0.776780 | 0.559803 |
| H | H7  | 0.540010 | 0.659719 | 0.418314 |
| H | H8  | 0.468898 | 0.710402 | 0.419472 |
| H | H9  | 0.485565 | 0.657465 | 0.521096 |
| C | C10 | 0.649582 | 0.761870 | 0.618464 |
| C | C11 | 0.598864 | 0.723835 | 0.585937 |
| C | C12 | 0.546371 | 0.746567 | 0.515471 |

|   |     |          |          |          |
|---|-----|----------|----------|----------|
| C | C13 | 0.508215 | 0.690042 | 0.465486 |
| O | 014 | 0.517004 | 0.033874 | 0.216796 |
| O | 015 | 0.025570 | 0.534138 | 0.713066 |
| O | 016 | 0.518771 | 0.442523 | 0.210941 |
| O | 017 | 0.010980 | 0.931100 | 0.705558 |
| O | 018 | 0.514083 | 0.946676 | 0.789073 |
| O | 019 | 0.011820 | 0.457664 | 0.289623 |
| O | 020 | 0.517983 | 0.535419 | 0.789466 |
| O | 021 | 0.020577 | 0.042386 | 0.293202 |
| O | 022 | 0.400264 | 0.056757 | 0.292411 |
| O | 023 | 0.147549 | 0.562661 | 0.761920 |
| O | 024 | 0.392701 | 0.430481 | 0.253486 |
| O | 025 | 0.127691 | 0.941911 | 0.786640 |
| O | 026 | 0.629617 | 0.939068 | 0.706456 |
| O | 027 | 0.890901 | 0.431108 | 0.233241 |
| O | 028 | 0.643279 | 0.546929 | 0.750435 |
| O | 029 | 0.901178 | 0.037393 | 0.222970 |
| O | 030 | 0.437094 | 0.121717 | 0.130608 |
| O | 031 | 0.095263 | 0.614935 | 0.599302 |
| O | 032 | 0.445084 | 0.365993 | 0.099847 |
| O | 033 | 0.110007 | 0.860347 | 0.634451 |
| O | 034 | 0.601793 | 0.858921 | 0.855776 |
| O | 035 | 0.941067 | 0.370814 | 0.391009 |
| O | 036 | 0.590067 | 0.615853 | 0.897961 |
| O | 037 | 0.929599 | 0.120580 | 0.371513 |
| O | 038 | 0.409542 | 0.993032 | 0.121675 |
| O | 039 | 0.124466 | 0.485645 | 0.606491 |
| O | 040 | 0.431620 | 0.497567 | 0.091544 |
| O | 041 | 0.105911 | 0.990908 | 0.604960 |
| O | 042 | 0.620615 | 0.987812 | 0.888483 |
| O | 043 | 0.910064 | 0.499657 | 0.397674 |
| O | 044 | 0.603127 | 0.483833 | 0.914867 |
| O | 045 | 0.927575 | 0.990084 | 0.404683 |
| O | 046 | 0.338074 | 0.038085 | 0.460451 |
| O | 047 | 0.199448 | 0.547688 | 0.939354 |
| O | 048 | 0.337891 | 0.445418 | 0.430849 |
| O | 049 | 0.195123 | 0.949616 | 0.952620 |
| O | 050 | 0.695928 | 0.935630 | 0.543367 |
| O | 051 | 0.833565 | 0.426479 | 0.060294 |
| O | 052 | 0.701120 | 0.534807 | 0.578295 |
| O | 053 | 0.835891 | 0.036355 | 0.053222 |
| O | 054 | 0.337666 | 0.943090 | 0.319840 |
| O | 055 | 0.195503 | 0.445382 | 0.812951 |
| O | 056 | 0.334001 | 0.543770 | 0.297628 |

|   |      |          |          |          |
|---|------|----------|----------|----------|
| 0 | 057  | 0.208281 | 0.043975 | 0.812869 |
| 0 | 058  | 0.705695 | 0.042649 | 0.662442 |
| 0 | 059  | 0.845428 | 0.543292 | 0.150378 |
| 0 | 060  | 0.711707 | 0.436908 | 0.711179 |
| 0 | 061  | 0.823633 | 0.934697 | 0.180013 |
| 0 | 062  | 0.269136 | 0.053967 | 0.296396 |
| 0 | 063  | 0.276514 | 0.547032 | 0.782517 |
| 0 | 064  | 0.262755 | 0.435204 | 0.273086 |
| 0 | 065  | 0.257157 | 0.924016 | 0.783319 |
| 0 | 066  | 0.760485 | 0.928505 | 0.712203 |
| 0 | 067  | 0.762252 | 0.452445 | 0.218782 |
| 0 | 068  | 0.772699 | 0.552189 | 0.738861 |
| 0 | 069  | 0.772182 | 0.052518 | 0.222324 |
| 0 | 070  | 0.311064 | 0.118049 | 0.611410 |
| 0 | 071  | 0.227789 | 0.622982 | 0.093392 |
| 0 | 072  | 0.319690 | 0.364690 | 0.582181 |
| 0 | 073  | 0.218013 | 0.870486 | 0.105723 |
| 0 | 074  | 0.714167 | 0.873834 | 0.375028 |
| 0 | 075  | 0.809974 | 0.352849 | 0.903288 |
| 0 | 076  | 0.714634 | 0.630257 | 0.444975 |
| 0 | 077  | 0.809825 | 0.113415 | 0.898143 |
| 0 | 078  | 0.218717 | 0.037544 | 0.536968 |
| 0 | 079  | 0.315333 | 0.535404 | 0.027991 |
| 0 | 080  | 0.217552 | 0.426795 | 0.500852 |
| 0 | 081  | 0.316512 | 0.934888 | 0.015647 |
| 0 | 082  | 0.813050 | 0.942280 | 0.457677 |
| 0 | 083  | 0.719936 | 0.439418 | 0.965562 |
| 0 | 084  | 0.819009 | 0.560024 | 0.504132 |
| 0 | 085  | 0.713342 | 0.049468 | 0.992015 |
| 0 | 086  | 0.319103 | 0.987684 | 0.637789 |
| 0 | 087  | 0.207235 | 0.492853 | 0.116315 |
| 0 | 088  | 0.303212 | 0.495087 | 0.605847 |
| 0 | 089  | 0.230763 | 0.000657 | 0.125982 |
| 0 | 090  | 0.711080 | 0.005616 | 0.381683 |
| 0 | 091  | 0.830106 | 0.482093 | 0.882197 |
| 0 | 092  | 0.726789 | 0.503861 | 0.391846 |
| 0 | 093  | 0.797590 | 0.982855 | 0.882399 |
| 0 | 094  | 0.129093 | 0.121728 | 0.604749 |
| 0 | 095  | 0.403390 | 0.627269 | 0.081626 |
| 0 | 096  | 0.123798 | 0.353866 | 0.584183 |
| 0 | 097  | 0.410366 | 0.861631 | 0.096107 |
| 0 | 098  | 0.905110 | 0.859661 | 0.391337 |
| 0 | 099  | 0.626308 | 0.353259 | 0.913437 |
| 0 | 0100 | 0.912773 | 0.631689 | 0.415126 |

|   |      |          |          |          |
|---|------|----------|----------|----------|
| 0 | 0101 | 0.620909 | 0.120003 | 0.902219 |
| 0 | 0102 | 0.107881 | 0.058728 | 0.437212 |
| 0 | 0103 | 0.420856 | 0.558348 | 0.917391 |
| 0 | 0104 | 0.095630 | 0.431263 | 0.432898 |
| 0 | 0105 | 0.439129 | 0.941126 | 0.947667 |
| 0 | 0106 | 0.919433 | 0.916046 | 0.566345 |
| 0 | 0107 | 0.616841 | 0.417979 | 0.083590 |
| 0 | 0108 | 0.940603 | 0.556693 | 0.569848 |
| 0 | 0109 | 0.590977 | 0.046376 | 0.058048 |
| 0 | 0110 | 0.143536 | 0.056574 | 0.247211 |
| 0 | 0111 | 0.399130 | 0.538258 | 0.723462 |
| 0 | 0112 | 0.134253 | 0.426689 | 0.244414 |
| 0 | 0113 | 0.387728 | 0.919976 | 0.769585 |
| 0 | 0114 | 0.887484 | 0.943978 | 0.753532 |
| 0 | 0115 | 0.638688 | 0.448055 | 0.274091 |
| 0 | 0116 | 0.901931 | 0.554138 | 0.759246 |
| 0 | 0117 | 0.642639 | 0.062592 | 0.237675 |
| 0 | 0118 | 0.107069 | 0.945626 | 0.336811 |
| 0 | 0119 | 0.434520 | 0.438271 | 0.840993 |
| 0 | 0120 | 0.108718 | 0.543021 | 0.330238 |
| 0 | 0121 | 0.424795 | 0.041487 | 0.821198 |
| 0 | 0122 | 0.942900 | 0.035201 | 0.638333 |
| 0 | 0123 | 0.596255 | 0.540511 | 0.145742 |
| 0 | 0124 | 0.935925 | 0.442302 | 0.666184 |
| 0 | 0125 | 0.608299 | 0.941960 | 0.177165 |
| 0 | 0126 | 0.226460 | 0.131465 | 0.150420 |
| 0 | 0127 | 0.320854 | 0.624035 | 0.636408 |
| 0 | 0128 | 0.215343 | 0.359889 | 0.130590 |
| 0 | 0129 | 0.315270 | 0.854483 | 0.642817 |
| 0 | 0130 | 0.816786 | 0.854949 | 0.849466 |
| 0 | 0131 | 0.725654 | 0.372595 | 0.365142 |
| 0 | 0132 | 0.827365 | 0.614986 | 0.889389 |
| 0 | 0133 | 0.718389 | 0.135679 | 0.351655 |
| 0 | 0134 | 0.518393 | 0.848089 | 0.208092 |
| 0 | 0135 | 0.026206 | 0.351421 | 0.716031 |
| 0 | 0136 | 0.507008 | 0.629488 | 0.201699 |
| 0 | 0137 | 0.018416 | 0.131385 | 0.711060 |
| 0 | 0138 | 0.517119 | 0.131862 | 0.782077 |
| 0 | 0139 | 0.013900 | 0.630148 | 0.289858 |
| 0 | 0140 | 0.525211 | 0.349688 | 0.787350 |
| 0 | 0141 | 0.016949 | 0.855808 | 0.287790 |
| 0 | 0142 | 0.402303 | 0.829410 | 0.286507 |
| 0 | 0143 | 0.148057 | 0.326054 | 0.773330 |
| 0 | 0144 | 0.389324 | 0.660498 | 0.272039 |

|   |      |          |          |          |
|---|------|----------|----------|----------|
| 0 | 0145 | 0.132850 | 0.152323 | 0.795944 |
| 0 | 0146 | 0.634920 | 0.149522 | 0.711003 |
| 0 | 0147 | 0.895916 | 0.654445 | 0.221905 |
| 0 | 0148 | 0.644816 | 0.324689 | 0.721781 |
| 0 | 0149 | 0.903978 | 0.829836 | 0.200940 |
| 0 | 0150 | 0.448145 | 0.742925 | 0.150579 |
| 0 | 0151 | 0.086331 | 0.239026 | 0.661491 |
| 0 | 0152 | 0.586399 | 0.238097 | 0.839925 |
| 0 | 0153 | 0.954506 | 0.744360 | 0.334461 |
| 0 | 0154 | 0.334876 | 0.844691 | 0.450034 |
| 0 | 0155 | 0.212221 | 0.344829 | 0.937842 |
| 0 | 0156 | 0.330680 | 0.635061 | 0.441931 |
| 0 | 0157 | 0.205308 | 0.134848 | 0.956252 |
| 0 | 0158 | 0.702534 | 0.149323 | 0.546542 |
| 0 | 0159 | 0.816638 | 0.661106 | 0.072521 |
| 0 | 0160 | 0.708787 | 0.352752 | 0.556870 |
| 0 | 0161 | 0.828634 | 0.838092 | 0.043644 |
| 0 | 0162 | 0.271858 | 0.833276 | 0.278003 |
| 0 | 0163 | 0.277691 | 0.347896 | 0.768293 |
| 0 | 0164 | 0.258396 | 0.651014 | 0.281752 |
| 0 | 0165 | 0.263047 | 0.161563 | 0.784649 |
| 0 | 0166 | 0.765101 | 0.152319 | 0.720021 |
| 0 | 0167 | 0.768384 | 0.628416 | 0.248595 |
| 0 | 0168 | 0.776205 | 0.322497 | 0.717338 |
| 0 | 0169 | 0.774552 | 0.816233 | 0.220142 |
| 0 | 0170 | 0.299147 | 0.739467 | 0.554516 |
| 0 | 0171 | 0.243002 | 0.243045 | 0.054190 |
| 0 | 0172 | 0.738100 | 0.251766 | 0.434906 |
| 0 | 0173 | 0.790978 | 0.738835 | 0.921299 |
| 0 | 0174 | 0.213813 | 0.837736 | 0.519573 |
| 0 | 0175 | 0.326840 | 0.342897 | 0.029596 |
| 0 | 0176 | 0.213486 | 0.640375 | 0.527207 |
| 0 | 0177 | 0.326652 | 0.142017 | 0.025776 |
| 0 | 0178 | 0.821603 | 0.151604 | 0.471005 |
| 0 | 0179 | 0.709082 | 0.639918 | 0.964658 |
| 0 | 0180 | 0.827860 | 0.343548 | 0.479738 |
| 0 | 0181 | 0.710333 | 0.839665 | 0.963848 |
| 0 | 0182 | 0.131067 | 0.740004 | 0.568934 |
| 0 | 0183 | 0.408259 | 0.241454 | 0.069646 |
| 0 | 0184 | 0.909751 | 0.245371 | 0.426049 |
| 0 | 0185 | 0.626394 | 0.740603 | 0.927158 |
| 0 | 0186 | 0.094848 | 0.834890 | 0.441543 |
| 0 | 0187 | 0.431377 | 0.317617 | 0.916291 |
| 0 | 0188 | 0.108222 | 0.662094 | 0.416060 |



|    |       |          |          |          |
|----|-------|----------|----------|----------|
| O  | O189  | 0.441918 | 0.147314 | 0.938191 |
| O  | O190  | 0.935833 | 0.155675 | 0.563576 |
| O  | O191  | 0.604976 | 0.663820 | 0.081403 |
| O  | O192  | 0.939205 | 0.324947 | 0.576187 |
| O  | O193  | 0.593544 | 0.841313 | 0.049331 |
| O  | O194  | 0.142763 | 0.830876 | 0.257163 |
| O  | O195  | 0.403516 | 0.334807 | 0.725516 |
| O  | O196  | 0.134234 | 0.651565 | 0.224310 |
| O  | O197  | 0.391606 | 0.160116 | 0.755842 |
| O  | O198  | 0.891898 | 0.131369 | 0.747866 |
| O  | O199  | 0.627404 | 0.638279 | 0.272425 |
| O  | O200  | 0.902212 | 0.334172 | 0.765548 |
| O  | O201  | 0.644821 | 0.820478 | 0.227945 |
| O  | O202  | 0.216089 | 0.745095 | 0.158594 |
| O  | O203  | 0.317743 | 0.245055 | 0.658089 |
| O  | O204  | 0.832817 | 0.233563 | 0.834963 |
| O  | O205  | 0.709545 | 0.743823 | 0.353168 |
| O  | O206  | 0.804390 | 0.767072 | 0.547288 |
| Al | Al207 | 0.703818 | 0.657621 | 0.318334 |
| Si | Si208 | 0.441459 | 0.051427 | 0.189649 |
| Si | Si209 | 0.098205 | 0.549242 | 0.669498 |
| Si | Si210 | 0.446062 | 0.434506 | 0.164104 |
| Si | Si211 | 0.088968 | 0.931262 | 0.682533 |
| Si | Si212 | 0.591088 | 0.933433 | 0.811264 |
| Si | Si213 | 0.938483 | 0.439958 | 0.328458 |
| Si | Si214 | 0.589650 | 0.545210 | 0.839305 |
| Si | Si215 | 0.943887 | 0.047607 | 0.323605 |
| Si | Si216 | 0.336046 | 0.022660 | 0.342681 |
| Si | Si217 | 0.204803 | 0.525340 | 0.824440 |
| Si | Si218 | 0.332054 | 0.463581 | 0.313914 |
| Si | Si219 | 0.197185 | 0.964838 | 0.834528 |
| Si | Si220 | 0.698286 | 0.962400 | 0.656496 |
| Si | Si221 | 0.833158 | 0.464269 | 0.166576 |
| Si | Si222 | 0.707312 | 0.517001 | 0.694941 |
| Si | Si223 | 0.833377 | 0.015010 | 0.169490 |
| Si | Si224 | 0.296291 | 0.045857 | 0.562166 |
| Si | Si225 | 0.237628 | 0.549876 | 0.044679 |
| Si | Si226 | 0.294669 | 0.432912 | 0.530267 |
| Si | Si227 | 0.240046 | 0.938682 | 0.050704 |
| Si | Si228 | 0.734768 | 0.938810 | 0.438503 |
| Si | Si229 | 0.798114 | 0.425358 | 0.953024 |
| Si | Si230 | 0.741026 | 0.556761 | 0.479510 |
| Si | Si231 | 0.789636 | 0.045842 | 0.956119 |
| Si | Si232 | 0.140594 | 0.052080 | 0.546232 |

|    |       |          |          |          |
|----|-------|----------|----------|----------|
| Si | Si233 | 0.392740 | 0.554732 | 0.029923 |
| Si | Si234 | 0.140526 | 0.424664 | 0.531466 |
| Si | Si235 | 0.393688 | 0.932819 | 0.045530 |
| Si | Si236 | 0.891011 | 0.926323 | 0.454984 |
| Si | Si237 | 0.641906 | 0.423363 | 0.969605 |
| Si | Si238 | 0.895712 | 0.562233 | 0.470925 |
| Si | Si239 | 0.636572 | 0.050981 | 0.959700 |
| Si | Si240 | 0.094388 | 0.025432 | 0.329165 |
| Si | Si241 | 0.442933 | 0.517481 | 0.818764 |
| Si | Si242 | 0.087713 | 0.464751 | 0.323805 |
| Si | Si243 | 0.441363 | 0.962527 | 0.831526 |
| Si | Si244 | 0.940162 | 0.956460 | 0.665885 |
| Si | Si245 | 0.592915 | 0.462615 | 0.178227 |
| Si | Si246 | 0.950551 | 0.521696 | 0.677476 |
| Si | Si247 | 0.589966 | 0.020980 | 0.172735 |
| Si | Si248 | 0.217580 | 0.060024 | 0.204931 |
| Si | Si249 | 0.324601 | 0.550718 | 0.686650 |
| Si | Si250 | 0.205244 | 0.429076 | 0.190422 |
| Si | Si251 | 0.319424 | 0.922162 | 0.708052 |
| Si | Si252 | 0.815867 | 0.928155 | 0.798736 |
| Si | Si253 | 0.713716 | 0.444300 | 0.312951 |
| Si | Si254 | 0.832859 | 0.550450 | 0.818267 |
| Si | Si255 | 0.711375 | 0.063609 | 0.298054 |
| Si | Si256 | 0.444970 | 0.820144 | 0.185314 |
| Si | Si257 | 0.095728 | 0.317754 | 0.683604 |
| Si | Si258 | 0.437594 | 0.664586 | 0.175975 |
| Si | Si259 | 0.091446 | 0.161406 | 0.693351 |
| Si | Si260 | 0.589792 | 0.160198 | 0.808767 |
| Si | Si261 | 0.943910 | 0.665340 | 0.315535 |
| Si | Si262 | 0.595628 | 0.316647 | 0.816024 |
| Si | Si263 | 0.945206 | 0.821759 | 0.303942 |
| Si | Si264 | 0.336449 | 0.862825 | 0.333038 |
| Si | Si265 | 0.208750 | 0.366098 | 0.822664 |
| Si | Si266 | 0.327930 | 0.622452 | 0.323253 |
| Si | Si267 | 0.202066 | 0.123103 | 0.837380 |
| Si | Si268 | 0.702172 | 0.123344 | 0.660121 |
| Si | Si269 | 0.829785 | 0.621411 | 0.175743 |
| Si | Si270 | 0.710318 | 0.359192 | 0.676646 |
| Si | Si271 | 0.832913 | 0.854988 | 0.160989 |
| Si | Si272 | 0.290281 | 0.818937 | 0.542002 |
| Si | Si273 | 0.249614 | 0.322369 | 0.038080 |
| Si | Si274 | 0.290575 | 0.660205 | 0.539269 |
| Si | Si275 | 0.250421 | 0.163268 | 0.046280 |
| Si | Si276 | 0.745331 | 0.172242 | 0.450862 |

|    |       |          |          |          |
|----|-------|----------|----------|----------|
| Si | Si277 | 0.786022 | 0.663093 | 0.962613 |
| Si | Si278 | 0.750214 | 0.329695 | 0.459410 |
| Si | Si279 | 0.786757 | 0.817621 | 0.945922 |
| Si | Si280 | 0.137120 | 0.818367 | 0.540646 |
| Si | Si281 | 0.402816 | 0.317292 | 0.028825 |
| Si | Si282 | 0.136958 | 0.664215 | 0.527995 |
| Si | Si283 | 0.403435 | 0.163104 | 0.040905 |
| Si | Si284 | 0.899549 | 0.167825 | 0.457737 |
| Si | Si285 | 0.632771 | 0.664767 | 0.968912 |
| Si | Si286 | 0.904445 | 0.321229 | 0.467912 |
| Si | Si287 | 0.633184 | 0.819730 | 0.949889 |
| Si | Si288 | 0.090528 | 0.866641 | 0.330639 |
| Si | Si289 | 0.448700 | 0.360232 | 0.817140 |
| Si | Si290 | 0.090964 | 0.621507 | 0.315104 |
| Si | Si291 | 0.443498 | 0.120189 | 0.824655 |
| Si | Si292 | 0.946811 | 0.113762 | 0.665287 |
| Si | Si293 | 0.584821 | 0.618298 | 0.177666 |
| Si | Si294 | 0.950774 | 0.363380 | 0.680906 |
| Si | Si295 | 0.591459 | 0.863057 | 0.165384 |
| Si | Si296 | 0.212162 | 0.820832 | 0.200106 |
| Si | Si297 | 0.329468 | 0.323079 | 0.684009 |
| Si | Si298 | 0.209005 | 0.667390 | 0.189548 |
| Si | Si299 | 0.320891 | 0.169977 | 0.702271 |
| Si | Si300 | 0.824807 | 0.157045 | 0.799664 |
| Si | Si301 | 0.830385 | 0.311468 | 0.804952 |
| Si | Si302 | 0.711421 | 0.814576 | 0.293914 |
| Zn | Zn303 | 0.728981 | 0.724539 | 0.506279 |

**TS-C<sub>4</sub>H<sub>8</sub>-Dehydro-on-HydroxyO-ZnOH<sup>+</sup> (Fig. 8/TS1 in Blue)**

Total energy = -1929.10141252 eV

data\_

\_audit\_creation\_method 'Materials Studio'

\_cell\_length\_a 20.357621

\_cell\_length\_b 20.050598

\_cell\_length\_c 13.476578

\_cell\_angle\_alpha 90.000000

\_cell\_angle\_beta 90.000000

\_cell\_angle\_gamma 90.000000

\_symmetry\_space\_group\_name\_H-M 'P1'

loop\_

\_atom\_site\_type\_symbol

\_atom\_site\_label

\_atom\_site\_fract\_x

\_atom\_site\_fract\_y

\_atom\_site\_fract\_z

|   |     |          |          |          |
|---|-----|----------|----------|----------|
| H | H1  | 0.790197 | 0.740192 | 0.649381 |
| H | H2  | 0.636406 | 0.684909 | 0.673220 |
| H | H3  | 0.698830 | 0.740428 | 0.622281 |
| H | H4  | 0.613076 | 0.676655 | 0.551734 |
| H | H5  | 0.499278 | 0.775545 | 0.779791 |
| H | H6  | 0.431043 | 0.728628 | 0.721544 |
| H | H7  | 0.493295 | 0.718463 | 0.568169 |
| H | H8  | 0.597581 | 0.802658 | 0.678245 |
| H | H9  | 0.584235 | 0.803191 | 0.549511 |
| C | C10 | 0.633247 | 0.713816 | 0.604162 |
| C | C11 | 0.479857 | 0.750024 | 0.714959 |
| C | C12 | 0.514590 | 0.745074 | 0.631142 |
| C | C13 | 0.583157 | 0.771165 | 0.615703 |
| O | O14 | 0.511961 | 0.030371 | 0.210728 |
| O | O15 | 0.021272 | 0.532090 | 0.708693 |
| O | O16 | 0.524251 | 0.439715 | 0.199609 |
| O | O17 | 0.013438 | 0.945402 | 0.704875 |
| O | O18 | 0.522113 | 0.958775 | 0.786171 |
| O | O19 | 0.018719 | 0.454337 | 0.282454 |
| O | O20 | 0.513401 | 0.546854 | 0.790478 |
| O | O21 | 0.021097 | 0.042923 | 0.290799 |
| O | O22 | 0.393292 | 0.059045 | 0.275231 |
| O | O23 | 0.137855 | 0.558746 | 0.782640 |
| O | O24 | 0.404045 | 0.452828 | 0.266310 |
| O | O25 | 0.137713 | 0.947207 | 0.755122 |
| O | O26 | 0.640750 | 0.931730 | 0.720844 |
| O | O27 | 0.901285 | 0.427759 | 0.209138 |
| O | O28 | 0.634865 | 0.543140 | 0.725337 |
| O | O29 | 0.896558 | 0.039875 | 0.240488 |
| O | O30 | 0.438180 | 0.116101 | 0.111186 |
| O | O31 | 0.099479 | 0.618301 | 0.617884 |
| O | O32 | 0.430939 | 0.366223 | 0.122024 |
| O | O33 | 0.095570 | 0.866736 | 0.610783 |
| O | O34 | 0.596262 | 0.870698 | 0.880943 |
| O | O35 | 0.940688 | 0.367163 | 0.372115 |
| O | O36 | 0.602519 | 0.623665 | 0.874069 |
| O | O37 | 0.938138 | 0.120531 | 0.385306 |
| O | O38 | 0.405669 | 0.987125 | 0.113456 |
| O | O39 | 0.130172 | 0.488818 | 0.617754 |
| O | O40 | 0.434776 | 0.496956 | 0.085332 |
| O | O41 | 0.099653 | 0.997753 | 0.581158 |
| O | O42 | 0.628202 | 0.999726 | 0.886157 |

|   |     |          |          |          |
|---|-----|----------|----------|----------|
| 0 | 043 | 0.910674 | 0.496117 | 0.375787 |
| 0 | 044 | 0.604827 | 0.492290 | 0.902763 |
| 0 | 045 | 0.935782 | 0.989537 | 0.414231 |
| 0 | 046 | 0.331167 | 0.061521 | 0.444593 |
| 0 | 047 | 0.201665 | 0.562255 | 0.950519 |
| 0 | 048 | 0.336289 | 0.448617 | 0.431712 |
| 0 | 049 | 0.200590 | 0.946298 | 0.924396 |
| 0 | 050 | 0.702263 | 0.929688 | 0.551803 |
| 0 | 051 | 0.839338 | 0.430422 | 0.038944 |
| 0 | 052 | 0.700587 | 0.532589 | 0.558260 |
| 0 | 053 | 0.833908 | 0.042839 | 0.070269 |
| 0 | 054 | 0.344527 | 0.946056 | 0.349309 |
| 0 | 055 | 0.191326 | 0.447566 | 0.852961 |
| 0 | 056 | 0.322496 | 0.552007 | 0.311399 |
| 0 | 057 | 0.214183 | 0.049727 | 0.803860 |
| 0 | 058 | 0.691117 | 0.044371 | 0.647905 |
| 0 | 059 | 0.853653 | 0.542094 | 0.143028 |
| 0 | 060 | 0.710361 | 0.436990 | 0.693921 |
| 0 | 061 | 0.818250 | 0.938921 | 0.190900 |
| 0 | 062 | 0.263749 | 0.038654 | 0.280939 |
| 0 | 063 | 0.268260 | 0.544025 | 0.784423 |
| 0 | 064 | 0.275365 | 0.434726 | 0.258626 |
| 0 | 065 | 0.267062 | 0.933661 | 0.756428 |
| 0 | 066 | 0.770722 | 0.950433 | 0.715023 |
| 0 | 067 | 0.771368 | 0.446883 | 0.202880 |
| 0 | 068 | 0.764720 | 0.554948 | 0.724484 |
| 0 | 069 | 0.767296 | 0.056064 | 0.237199 |
| 0 | 070 | 0.304087 | 0.132219 | 0.604123 |
| 0 | 071 | 0.233555 | 0.627777 | 0.112946 |
| 0 | 072 | 0.326408 | 0.375202 | 0.589668 |
| 0 | 073 | 0.210150 | 0.869530 | 0.079161 |
| 0 | 074 | 0.727112 | 0.866082 | 0.387398 |
| 0 | 075 | 0.807496 | 0.364360 | 0.878091 |
| 0 | 076 | 0.724271 | 0.624073 | 0.423328 |
| 0 | 077 | 0.821199 | 0.120785 | 0.915544 |
| 0 | 078 | 0.219319 | 0.040247 | 0.541010 |
| 0 | 079 | 0.315190 | 0.536341 | 0.038622 |
| 0 | 080 | 0.217776 | 0.426430 | 0.505127 |
| 0 | 081 | 0.318377 | 0.924743 | 0.000698 |
| 0 | 082 | 0.815425 | 0.951421 | 0.456743 |
| 0 | 083 | 0.723085 | 0.451443 | 0.954266 |
| 0 | 084 | 0.823006 | 0.551447 | 0.495833 |
| 0 | 085 | 0.715143 | 0.064015 | 0.996462 |
| 0 | 086 | 0.332343 | 0.003488 | 0.620522 |

|   |      |          |          |          |
|---|------|----------|----------|----------|
| 0 | 087  | 0.204249 | 0.498561 | 0.122144 |
| 0 | 088  | 0.299278 | 0.504361 | 0.602002 |
| 0 | 089  | 0.233517 | 0.999081 | 0.098066 |
| 0 | 090  | 0.703051 | 0.995914 | 0.383479 |
| 0 | 091  | 0.831821 | 0.494927 | 0.868975 |
| 0 | 092  | 0.735169 | 0.497254 | 0.375418 |
| 0 | 093  | 0.800294 | 0.990961 | 0.896840 |
| 0 | 094  | 0.126859 | 0.127760 | 0.589247 |
| 0 | 095  | 0.402042 | 0.626557 | 0.094369 |
| 0 | 096  | 0.116985 | 0.359553 | 0.579396 |
| 0 | 097  | 0.419258 | 0.857926 | 0.075909 |
| 0 | 098  | 0.905340 | 0.860597 | 0.407310 |
| 0 | 099  | 0.635037 | 0.363199 | 0.891860 |
| 0 | 0100 | 0.912654 | 0.626702 | 0.405257 |
| 0 | 0101 | 0.615557 | 0.130069 | 0.915007 |
| 0 | 0102 | 0.120365 | 0.065448 | 0.416319 |
| 0 | 0103 | 0.416635 | 0.566583 | 0.921130 |
| 0 | 0104 | 0.096278 | 0.446747 | 0.438354 |
| 0 | 0105 | 0.439604 | 0.944896 | 0.934184 |
| 0 | 0106 | 0.914087 | 0.922673 | 0.580042 |
| 0 | 0107 | 0.619081 | 0.420793 | 0.065853 |
| 0 | 0108 | 0.946645 | 0.544925 | 0.551258 |
| 0 | 0109 | 0.593264 | 0.047254 | 0.061690 |
| 0 | 0110 | 0.140486 | 0.037970 | 0.224206 |
| 0 | 0111 | 0.392556 | 0.538192 | 0.730415 |
| 0 | 0112 | 0.144771 | 0.425965 | 0.257646 |
| 0 | 0113 | 0.397673 | 0.929091 | 0.748342 |
| 0 | 0114 | 0.894065 | 0.951907 | 0.771773 |
| 0 | 0115 | 0.646071 | 0.447189 | 0.254965 |
| 0 | 0116 | 0.895171 | 0.563389 | 0.731396 |
| 0 | 0117 | 0.636521 | 0.061252 | 0.246630 |
| 0 | 0118 | 0.100418 | 0.943877 | 0.348591 |
| 0 | 0119 | 0.437788 | 0.445893 | 0.852241 |
| 0 | 0120 | 0.110204 | 0.547327 | 0.313889 |
| 0 | 0121 | 0.427759 | 0.048982 | 0.815082 |
| 0 | 0122 | 0.934838 | 0.044480 | 0.645551 |
| 0 | 0123 | 0.597400 | 0.541196 | 0.135670 |
| 0 | 0124 | 0.927814 | 0.442092 | 0.673082 |
| 0 | 0125 | 0.606645 | 0.941443 | 0.177654 |
| 0 | 0126 | 0.222164 | 0.125113 | 0.145218 |
| 0 | 0127 | 0.316165 | 0.629477 | 0.651427 |
| 0 | 0128 | 0.214524 | 0.365660 | 0.120646 |
| 0 | 0129 | 0.327610 | 0.870648 | 0.610623 |
| 0 | 0130 | 0.813261 | 0.864735 | 0.851624 |

|   |      |          |          |          |
|---|------|----------|----------|----------|
| 0 | 0131 | 0.728298 | 0.366835 | 0.345559 |
| 0 | 0132 | 0.821587 | 0.628384 | 0.859007 |
| 0 | 0133 | 0.707680 | 0.128423 | 0.374139 |
| 0 | 0134 | 0.513677 | 0.850442 | 0.212904 |
| 0 | 0135 | 0.020311 | 0.351579 | 0.712911 |
| 0 | 0136 | 0.511124 | 0.630288 | 0.201296 |
| 0 | 0137 | 0.021585 | 0.134828 | 0.706301 |
| 0 | 0138 | 0.519841 | 0.140311 | 0.780089 |
| 0 | 0139 | 0.017644 | 0.639016 | 0.287266 |
| 0 | 0140 | 0.523624 | 0.356470 | 0.787160 |
| 0 | 0141 | 0.012049 | 0.854271 | 0.291354 |
| 0 | 0142 | 0.390348 | 0.835424 | 0.265209 |
| 0 | 0143 | 0.142386 | 0.337705 | 0.769672 |
| 0 | 0144 | 0.397836 | 0.658404 | 0.286774 |
| 0 | 0145 | 0.138770 | 0.156002 | 0.782585 |
| 0 | 0146 | 0.642703 | 0.155055 | 0.725604 |
| 0 | 0147 | 0.901417 | 0.655809 | 0.211803 |
| 0 | 0148 | 0.637063 | 0.328297 | 0.701596 |
| 0 | 0149 | 0.895199 | 0.833244 | 0.214424 |
| 0 | 0150 | 0.447885 | 0.742327 | 0.155128 |
| 0 | 0151 | 0.087869 | 0.243929 | 0.657201 |
| 0 | 0152 | 0.587642 | 0.246827 | 0.839019 |
| 0 | 0153 | 0.946048 | 0.744838 | 0.340818 |
| 0 | 0154 | 0.320183 | 0.826793 | 0.425500 |
| 0 | 0155 | 0.209046 | 0.328437 | 0.932090 |
| 0 | 0156 | 0.334540 | 0.643432 | 0.456665 |
| 0 | 0157 | 0.203598 | 0.140027 | 0.951072 |
| 0 | 0158 | 0.712289 | 0.162223 | 0.564639 |
| 0 | 0159 | 0.832640 | 0.655417 | 0.049646 |
| 0 | 0160 | 0.705722 | 0.353788 | 0.538175 |
| 0 | 0161 | 0.830348 | 0.847632 | 0.046035 |
| 0 | 0162 | 0.262499 | 0.864163 | 0.258065 |
| 0 | 0163 | 0.270866 | 0.362228 | 0.765360 |
| 0 | 0164 | 0.266583 | 0.669109 | 0.295041 |
| 0 | 0165 | 0.269867 | 0.167271 | 0.788800 |
| 0 | 0166 | 0.771159 | 0.130349 | 0.734393 |
| 0 | 0167 | 0.773327 | 0.632124 | 0.222202 |
| 0 | 0168 | 0.768462 | 0.319889 | 0.700858 |
| 0 | 0169 | 0.764467 | 0.820070 | 0.209396 |
| 0 | 0170 | 0.296839 | 0.745452 | 0.573052 |
| 0 | 0171 | 0.240110 | 0.241846 | 0.069461 |
| 0 | 0172 | 0.741929 | 0.249649 | 0.426263 |
| 0 | 0173 | 0.793722 | 0.747944 | 0.924498 |
| 0 | 0174 | 0.211561 | 0.842470 | 0.531333 |

|    |       |          |          |          |
|----|-------|----------|----------|----------|
| O  | O175  | 0.324177 | 0.338182 | 0.019666 |
| O  | O176  | 0.214168 | 0.645637 | 0.530814 |
| O  | O177  | 0.324028 | 0.144031 | 0.024371 |
| O  | O178  | 0.822541 | 0.147652 | 0.463523 |
| O  | O179  | 0.713527 | 0.648088 | 0.968606 |
| O  | O180  | 0.827623 | 0.346339 | 0.469251 |
| O  | O181  | 0.710571 | 0.846496 | 0.971080 |
| O  | O182  | 0.128802 | 0.742378 | 0.572649 |
| O  | O183  | 0.407750 | 0.241402 | 0.072578 |
| O  | O184  | 0.907399 | 0.245593 | 0.422472 |
| O  | O185  | 0.629984 | 0.747013 | 0.922943 |
| O  | O186  | 0.103602 | 0.823005 | 0.423891 |
| O  | O187  | 0.440465 | 0.326926 | 0.932528 |
| O  | O188  | 0.103393 | 0.654489 | 0.430334 |
| O  | O189  | 0.435217 | 0.158486 | 0.925429 |
| O  | O190  | 0.930318 | 0.165394 | 0.572251 |
| O  | O191  | 0.599746 | 0.662265 | 0.064682 |
| O  | O192  | 0.941463 | 0.333678 | 0.560983 |
| O  | O193  | 0.598433 | 0.831404 | 0.067690 |
| O  | O194  | 0.135139 | 0.841051 | 0.234566 |
| O  | O195  | 0.398463 | 0.340935 | 0.746192 |
| O  | O196  | 0.140992 | 0.665185 | 0.242021 |
| O  | O197  | 0.395747 | 0.165138 | 0.737291 |
| O  | O198  | 0.898747 | 0.145665 | 0.761769 |
| O  | O199  | 0.634458 | 0.641113 | 0.254234 |
| O  | O200  | 0.895526 | 0.324091 | 0.745034 |
| O  | O201  | 0.637622 | 0.825405 | 0.255651 |
| O  | O202  | 0.221542 | 0.753707 | 0.163540 |
| O  | O203  | 0.315073 | 0.256097 | 0.663810 |
| O  | O204  | 0.816984 | 0.237358 | 0.832326 |
| O  | O205  | 0.715564 | 0.740150 | 0.347850 |
| O  | O206  | 0.756585 | 0.761313 | 0.609022 |
| Al | Al207 | 0.711512 | 0.655991 | 0.300011 |
| Si | Si208 | 0.437618 | 0.048259 | 0.176631 |
| Si | Si209 | 0.096835 | 0.549426 | 0.680591 |
| Si | Si210 | 0.447729 | 0.439043 | 0.167851 |
| Si | Si211 | 0.087603 | 0.939244 | 0.662797 |
| Si | Si212 | 0.596324 | 0.940378 | 0.819682 |
| Si | Si213 | 0.943330 | 0.436440 | 0.310333 |
| Si | Si214 | 0.589523 | 0.551476 | 0.823879 |
| Si | Si215 | 0.946854 | 0.048316 | 0.332737 |
| Si | Si216 | 0.333135 | 0.025939 | 0.336842 |
| Si | Si217 | 0.200044 | 0.527755 | 0.841878 |
| Si | Si218 | 0.334506 | 0.471998 | 0.316972 |



|    |       |          |          |          |
|----|-------|----------|----------|----------|
| Si | Si219 | 0.204940 | 0.969331 | 0.809722 |
| Si | Si220 | 0.701346 | 0.964420 | 0.660080 |
| Si | Si221 | 0.841174 | 0.462622 | 0.149237 |
| Si | Si222 | 0.702496 | 0.516642 | 0.676083 |
| Si | Si223 | 0.829131 | 0.019300 | 0.184899 |
| Si | Si224 | 0.296587 | 0.059584 | 0.552759 |
| Si | Si225 | 0.238712 | 0.556689 | 0.056633 |
| Si | Si226 | 0.294739 | 0.438541 | 0.532769 |
| Si | Si227 | 0.240883 | 0.934886 | 0.026229 |
| Si | Si228 | 0.737478 | 0.936007 | 0.444791 |
| Si | Si229 | 0.800248 | 0.435059 | 0.934649 |
| Si | Si230 | 0.745979 | 0.550480 | 0.463238 |
| Si | Si231 | 0.792535 | 0.054747 | 0.969267 |
| Si | Si232 | 0.141713 | 0.058103 | 0.531948 |
| Si | Si233 | 0.392404 | 0.556796 | 0.035107 |
| Si | Si234 | 0.140658 | 0.430737 | 0.535044 |
| Si | Si235 | 0.395359 | 0.928936 | 0.030960 |
| Si | Si236 | 0.892418 | 0.930641 | 0.464724 |
| Si | Si237 | 0.645694 | 0.431827 | 0.953662 |
| Si | Si238 | 0.898550 | 0.554837 | 0.456321 |
| Si | Si239 | 0.638334 | 0.060213 | 0.964743 |
| Si | Si240 | 0.095494 | 0.022613 | 0.320559 |
| Si | Si241 | 0.440359 | 0.524589 | 0.824036 |
| Si | Si242 | 0.092482 | 0.468555 | 0.322418 |
| Si | Si243 | 0.446657 | 0.970359 | 0.820350 |
| Si | Si244 | 0.939181 | 0.965998 | 0.675157 |
| Si | Si245 | 0.596688 | 0.462734 | 0.163860 |
| Si | Si246 | 0.947583 | 0.520614 | 0.666714 |
| Si | Si247 | 0.587241 | 0.020150 | 0.174832 |
| Si | Si248 | 0.215180 | 0.049761 | 0.187247 |
| Si | Si249 | 0.318795 | 0.553489 | 0.692700 |
| Si | Si250 | 0.210182 | 0.431584 | 0.189431 |
| Si | Si251 | 0.330697 | 0.934492 | 0.683712 |
| Si | Si252 | 0.819391 | 0.939845 | 0.808584 |
| Si | Si253 | 0.720464 | 0.439489 | 0.294276 |
| Si | Si254 | 0.828343 | 0.559673 | 0.796990 |
| Si | Si255 | 0.704062 | 0.060150 | 0.310263 |
| Si | Si256 | 0.442751 | 0.821272 | 0.177532 |
| Si | Si257 | 0.091847 | 0.322944 | 0.680009 |
| Si | Si258 | 0.440189 | 0.664415 | 0.184520 |
| Si | Si259 | 0.093819 | 0.165589 | 0.683851 |
| Si | Si260 | 0.591301 | 0.167950 | 0.814871 |
| Si | Si261 | 0.944398 | 0.666512 | 0.310958 |
| Si | Si262 | 0.595573 | 0.323710 | 0.804957 |

|    |       |          |          |          |
|----|-------|----------|----------|----------|
| Si | Si263 | 0.939884 | 0.823132 | 0.313425 |
| Si | Si264 | 0.329326 | 0.868464 | 0.323853 |
| Si | Si265 | 0.203618 | 0.369353 | 0.829254 |
| Si | Si266 | 0.331029 | 0.630574 | 0.337709 |
| Si | Si267 | 0.206067 | 0.128044 | 0.831964 |
| Si | Si268 | 0.704694 | 0.122778 | 0.668598 |
| Si | Si269 | 0.838424 | 0.621149 | 0.158430 |
| Si | Si270 | 0.704864 | 0.359652 | 0.658258 |
| Si | Si271 | 0.827712 | 0.860314 | 0.164841 |
| Si | Si272 | 0.288934 | 0.821642 | 0.535691 |
| Si | Si273 | 0.247207 | 0.318953 | 0.036396 |
| Si | Si274 | 0.290418 | 0.666355 | 0.551750 |
| Si | Si275 | 0.247445 | 0.163116 | 0.046376 |
| Si | Si276 | 0.746192 | 0.171854 | 0.456922 |
| Si | Si277 | 0.790075 | 0.669415 | 0.951181 |
| Si | Si278 | 0.750887 | 0.328678 | 0.445483 |
| Si | Si279 | 0.786975 | 0.826299 | 0.949411 |
| Si | Si280 | 0.134946 | 0.818935 | 0.534600 |
| Si | Si281 | 0.401049 | 0.318514 | 0.036715 |
| Si | Si282 | 0.136682 | 0.665203 | 0.537988 |
| Si | Si283 | 0.401142 | 0.165006 | 0.033597 |
| Si | Si284 | 0.899700 | 0.169366 | 0.461039 |
| Si | Si285 | 0.636359 | 0.669642 | 0.958645 |
| Si | Si286 | 0.904048 | 0.323213 | 0.456112 |
| Si | Si287 | 0.633963 | 0.823756 | 0.960714 |
| Si | Si288 | 0.087881 | 0.865666 | 0.324226 |
| Si | Si289 | 0.449708 | 0.367565 | 0.829142 |
| Si | Si290 | 0.093152 | 0.626338 | 0.318846 |
| Si | Si291 | 0.444493 | 0.128110 | 0.814783 |
| Si | Si292 | 0.946288 | 0.122580 | 0.671733 |
| Si | Si293 | 0.586923 | 0.619227 | 0.166055 |
| Si | Si294 | 0.946090 | 0.363133 | 0.672811 |
| Si | Si295 | 0.588934 | 0.862420 | 0.177819 |
| Si | Si296 | 0.207239 | 0.831705 | 0.185160 |
| Si | Si297 | 0.327708 | 0.333427 | 0.692350 |
| Si | Si298 | 0.215366 | 0.677804 | 0.203094 |
| Si | Si299 | 0.321574 | 0.179145 | 0.698337 |
| Si | Si300 | 0.826929 | 0.158746 | 0.809884 |
| Si | Si301 | 0.822428 | 0.312455 | 0.789407 |
| Si | Si302 | 0.711087 | 0.814562 | 0.298868 |
| Zn | Zn303 | 0.712270 | 0.714320 | 0.494671 |

**M-C<sub>4</sub>H<sub>7</sub>Zn-OH<sub>2</sub>-ZnOH<sup>+</sup> (Fig. 8/M2 in Blue)** Total energy = -1930.52334323 eV

```

data_
_audit_creation_method      'Materials Studio'
_cell_length_a              20.357621
_cell_length_b              20.050598
_cell_length_c              13.476578
_cell_angle_alpha           90.000000
_cell_angle_beta            90.000000
_cell_angle_gamma           90.000000
_symmetry_space_group_name_H-M  'P1'
loop_
_atom_site_type_symbol
_atom_site_label
_atom_site_fract_x
_atom_site_fract_y
_atom_site_fract_z
  H      H1              0.838719          0.701444          0.542165
  H      H2              0.642179          0.690403          0.663193
  H      H3              0.833021          0.768273          0.485945
  H      H4              0.601469          0.667008          0.553662
  H      H5              0.507578          0.780382          0.778188
  H      H6              0.434362          0.735265          0.731781
  H      H7              0.486271          0.718683          0.571712
  H      H8              0.599911          0.803193          0.657214
  H      H9              0.577261          0.796879          0.531586
  C      C10             0.627324          0.708538          0.589861
  C      C11             0.483399          0.754376          0.717609
  C      C12             0.512514          0.745918          0.629626
  C      C13             0.580525          0.768764          0.601399
  O      O14             0.511534          0.030473          0.210389
  O      O15             0.020763          0.532412          0.708804
  O      O16             0.524271          0.440016          0.199347
  O      O17             0.013736          0.945298          0.704664
  O      O18             0.522526          0.958716          0.786867
  O      O19             0.018189          0.454425          0.281950
  O      O20             0.513585          0.547427          0.790228
  O      O21             0.021276          0.042935          0.290013
  O      O22             0.393149          0.059569          0.275186
  O      O23             0.137753          0.559178          0.781605
  O      O24             0.403797          0.452701          0.265922
  O      O25             0.137888          0.948106          0.755688
  O      O26             0.641274          0.930917          0.722148
  O      O27             0.901165          0.426914          0.207682
  O      O28             0.634442          0.540190          0.723432
  O      O29             0.895972          0.040773          0.242820

```

|   |     |          |          |          |
|---|-----|----------|----------|----------|
| 0 | 030 | 0.437912 | 0.116214 | 0.110729 |
| 0 | 031 | 0.098873 | 0.617954 | 0.616429 |
| 0 | 032 | 0.431017 | 0.366449 | 0.121399 |
| 0 | 033 | 0.096440 | 0.866358 | 0.612496 |
| 0 | 034 | 0.596352 | 0.871709 | 0.884372 |
| 0 | 035 | 0.940517 | 0.366525 | 0.370965 |
| 0 | 036 | 0.604809 | 0.624101 | 0.869646 |
| 0 | 037 | 0.939484 | 0.119187 | 0.389083 |
| 0 | 038 | 0.404987 | 0.987302 | 0.113647 |
| 0 | 039 | 0.129302 | 0.488485 | 0.617519 |
| 0 | 040 | 0.434619 | 0.497151 | 0.085201 |
| 0 | 041 | 0.099987 | 0.997118 | 0.580549 |
| 0 | 042 | 0.628712 | 0.000582 | 0.885757 |
| 0 | 043 | 0.909714 | 0.495458 | 0.374333 |
| 0 | 044 | 0.604785 | 0.493256 | 0.903270 |
| 0 | 045 | 0.937385 | 0.987332 | 0.412930 |
| 0 | 046 | 0.331548 | 0.061395 | 0.444988 |
| 0 | 047 | 0.201251 | 0.561976 | 0.949859 |
| 0 | 048 | 0.336037 | 0.448851 | 0.431446 |
| 0 | 049 | 0.200927 | 0.946795 | 0.924866 |
| 0 | 050 | 0.703963 | 0.928455 | 0.553491 |
| 0 | 051 | 0.839488 | 0.429604 | 0.037241 |
| 0 | 052 | 0.701212 | 0.529427 | 0.556984 |
| 0 | 053 | 0.834008 | 0.043146 | 0.072264 |
| 0 | 054 | 0.344106 | 0.946387 | 0.348287 |
| 0 | 055 | 0.191225 | 0.447790 | 0.850806 |
| 0 | 056 | 0.322151 | 0.552026 | 0.310723 |
| 0 | 057 | 0.215345 | 0.049918 | 0.803829 |
| 0 | 058 | 0.691381 | 0.043695 | 0.648016 |
| 0 | 059 | 0.851737 | 0.540797 | 0.143116 |
| 0 | 060 | 0.712479 | 0.435672 | 0.694099 |
| 0 | 061 | 0.818425 | 0.939308 | 0.192635 |
| 0 | 062 | 0.263621 | 0.039844 | 0.281398 |
| 0 | 063 | 0.268208 | 0.544854 | 0.783952 |
| 0 | 064 | 0.274990 | 0.434751 | 0.258581 |
| 0 | 065 | 0.267222 | 0.933360 | 0.756771 |
| 0 | 066 | 0.771070 | 0.950108 | 0.716942 |
| 0 | 067 | 0.770935 | 0.443597 | 0.201110 |
| 0 | 068 | 0.763965 | 0.554946 | 0.724389 |
| 0 | 069 | 0.766662 | 0.055939 | 0.238830 |
| 0 | 070 | 0.303977 | 0.132038 | 0.604461 |
| 0 | 071 | 0.233877 | 0.628110 | 0.111465 |
| 0 | 072 | 0.325760 | 0.375156 | 0.589116 |
| 0 | 073 | 0.209168 | 0.870568 | 0.080420 |

|   |      |          |          |          |
|---|------|----------|----------|----------|
| 0 | 074  | 0.730457 | 0.864703 | 0.389900 |
| 0 | 075  | 0.806732 | 0.363903 | 0.876334 |
| 0 | 076  | 0.722278 | 0.621269 | 0.421607 |
| 0 | 077  | 0.821644 | 0.120895 | 0.917777 |
| 0 | 078  | 0.219513 | 0.040028 | 0.540725 |
| 0 | 079  | 0.315062 | 0.536162 | 0.037408 |
| 0 | 080  | 0.217401 | 0.426907 | 0.504626 |
| 0 | 081  | 0.318429 | 0.923633 | 0.001233 |
| 0 | 082  | 0.815898 | 0.952821 | 0.457231 |
| 0 | 083  | 0.723165 | 0.451665 | 0.953457 |
| 0 | 084  | 0.822823 | 0.552303 | 0.495665 |
| 0 | 085  | 0.715422 | 0.063729 | 0.997689 |
| 0 | 086  | 0.332371 | 0.003328 | 0.620869 |
| 0 | 087  | 0.204236 | 0.499001 | 0.121997 |
| 0 | 088  | 0.299046 | 0.504375 | 0.602006 |
| 0 | 089  | 0.234947 | 0.999678 | 0.098195 |
| 0 | 090  | 0.702170 | 0.994184 | 0.383646 |
| 0 | 091  | 0.832045 | 0.494195 | 0.867337 |
| 0 | 092  | 0.738288 | 0.493657 | 0.375565 |
| 0 | 093  | 0.801202 | 0.991027 | 0.898573 |
| 0 | 094  | 0.126562 | 0.127243 | 0.588378 |
| 0 | 095  | 0.401479 | 0.626598 | 0.094042 |
| 0 | 096  | 0.116929 | 0.359298 | 0.578600 |
| 0 | 097  | 0.420208 | 0.858172 | 0.075901 |
| 0 | 098  | 0.903171 | 0.858766 | 0.410128 |
| 0 | 099  | 0.634678 | 0.363988 | 0.891576 |
| 0 | 0100 | 0.913870 | 0.625992 | 0.407417 |
| 0 | 0101 | 0.616326 | 0.130622 | 0.916148 |
| 0 | 0102 | 0.120674 | 0.064779 | 0.415619 |
| 0 | 0103 | 0.416752 | 0.566638 | 0.920790 |
| 0 | 0104 | 0.095810 | 0.446684 | 0.437872 |
| 0 | 0105 | 0.439587 | 0.945342 | 0.934614 |
| 0 | 0106 | 0.913885 | 0.922513 | 0.580742 |
| 0 | 0107 | 0.619326 | 0.421248 | 0.065927 |
| 0 | 0108 | 0.946391 | 0.542642 | 0.550789 |
| 0 | 0109 | 0.593317 | 0.047590 | 0.061939 |
| 0 | 0110 | 0.140709 | 0.036800 | 0.223535 |
| 0 | 0111 | 0.392617 | 0.537237 | 0.730460 |
| 0 | 0112 | 0.144322 | 0.426602 | 0.257130 |
| 0 | 0113 | 0.397950 | 0.929317 | 0.748813 |
| 0 | 0114 | 0.894563 | 0.952587 | 0.772386 |
| 0 | 0115 | 0.646112 | 0.447290 | 0.255509 |
| 0 | 0116 | 0.894390 | 0.563650 | 0.729906 |
| 0 | 0117 | 0.635917 | 0.060701 | 0.247609 |

|   |      |          |          |          |
|---|------|----------|----------|----------|
| 0 | 0118 | 0.099594 | 0.943382 | 0.348301 |
| 0 | 0119 | 0.438843 | 0.445889 | 0.852696 |
| 0 | 0120 | 0.109131 | 0.547716 | 0.314139 |
| 0 | 0121 | 0.428328 | 0.049164 | 0.815291 |
| 0 | 0122 | 0.935322 | 0.044475 | 0.644839 |
| 0 | 0123 | 0.598068 | 0.541476 | 0.136439 |
| 0 | 0124 | 0.927610 | 0.441550 | 0.675376 |
| 0 | 0125 | 0.605972 | 0.941443 | 0.176556 |
| 0 | 0126 | 0.221124 | 0.125470 | 0.144958 |
| 0 | 0127 | 0.317508 | 0.629400 | 0.650922 |
| 0 | 0128 | 0.214008 | 0.365975 | 0.120511 |
| 0 | 0129 | 0.328096 | 0.870455 | 0.611267 |
| 0 | 0130 | 0.814665 | 0.864769 | 0.852744 |
| 0 | 0131 | 0.726865 | 0.364298 | 0.343976 |
| 0 | 0132 | 0.821498 | 0.627574 | 0.860035 |
| 0 | 0133 | 0.706782 | 0.126695 | 0.377153 |
| 0 | 0134 | 0.514048 | 0.849672 | 0.213425 |
| 0 | 0135 | 0.020179 | 0.350737 | 0.711969 |
| 0 | 0136 | 0.511074 | 0.630123 | 0.199985 |
| 0 | 0137 | 0.021785 | 0.134820 | 0.706411 |
| 0 | 0138 | 0.520272 | 0.140695 | 0.781457 |
| 0 | 0139 | 0.018158 | 0.641206 | 0.287808 |
| 0 | 0140 | 0.523517 | 0.355644 | 0.786804 |
| 0 | 0141 | 0.011323 | 0.852806 | 0.294673 |
| 0 | 0142 | 0.390096 | 0.835753 | 0.264535 |
| 0 | 0143 | 0.142290 | 0.337442 | 0.768991 |
| 0 | 0144 | 0.398145 | 0.658048 | 0.286498 |
| 0 | 0145 | 0.139374 | 0.155686 | 0.781467 |
| 0 | 0146 | 0.643076 | 0.154271 | 0.726430 |
| 0 | 0147 | 0.901514 | 0.653192 | 0.212800 |
| 0 | 0148 | 0.637245 | 0.328284 | 0.701403 |
| 0 | 0149 | 0.894764 | 0.833805 | 0.215878 |
| 0 | 0150 | 0.447484 | 0.742255 | 0.154852 |
| 0 | 0151 | 0.088248 | 0.243560 | 0.656169 |
| 0 | 0152 | 0.588761 | 0.246979 | 0.839403 |
| 0 | 0153 | 0.942499 | 0.744068 | 0.342709 |
| 0 | 0154 | 0.320813 | 0.827278 | 0.425789 |
| 0 | 0155 | 0.208556 | 0.329195 | 0.931998 |
| 0 | 0156 | 0.334410 | 0.643447 | 0.455870 |
| 0 | 0157 | 0.203393 | 0.140265 | 0.950641 |
| 0 | 0158 | 0.713833 | 0.161868 | 0.566703 |
| 0 | 0159 | 0.832805 | 0.654654 | 0.050616 |
| 0 | 0160 | 0.705648 | 0.352726 | 0.537535 |
| 0 | 0161 | 0.830766 | 0.848277 | 0.046994 |

|   |      |          |          |          |
|---|------|----------|----------|----------|
| 0 | 0162 | 0.261865 | 0.863756 | 0.259027 |
| 0 | 0163 | 0.270816 | 0.361617 | 0.765216 |
| 0 | 0164 | 0.266980 | 0.669443 | 0.293708 |
| 0 | 0165 | 0.270443 | 0.167743 | 0.789058 |
| 0 | 0166 | 0.771442 | 0.128596 | 0.736711 |
| 0 | 0167 | 0.773090 | 0.632099 | 0.223523 |
| 0 | 0168 | 0.768544 | 0.317715 | 0.699514 |
| 0 | 0169 | 0.763865 | 0.820864 | 0.209445 |
| 0 | 0170 | 0.297283 | 0.745366 | 0.572722 |
| 0 | 0171 | 0.239421 | 0.242190 | 0.068974 |
| 0 | 0172 | 0.741921 | 0.248231 | 0.426367 |
| 0 | 0173 | 0.795283 | 0.747759 | 0.925949 |
| 0 | 0174 | 0.212142 | 0.842460 | 0.531641 |
| 0 | 0175 | 0.323773 | 0.338443 | 0.019860 |
| 0 | 0176 | 0.214641 | 0.645198 | 0.532159 |
| 0 | 0177 | 0.323497 | 0.144241 | 0.025000 |
| 0 | 0178 | 0.822879 | 0.146586 | 0.462654 |
| 0 | 0179 | 0.713647 | 0.648932 | 0.969595 |
| 0 | 0180 | 0.827187 | 0.345597 | 0.467126 |
| 0 | 0181 | 0.711405 | 0.846256 | 0.970601 |
| 0 | 0182 | 0.129500 | 0.742165 | 0.573641 |
| 0 | 0183 | 0.407245 | 0.241637 | 0.072748 |
| 0 | 0184 | 0.907783 | 0.244931 | 0.422741 |
| 0 | 0185 | 0.630094 | 0.747389 | 0.922216 |
| 0 | 0186 | 0.103754 | 0.822954 | 0.425453 |
| 0 | 0187 | 0.439776 | 0.326644 | 0.931940 |
| 0 | 0188 | 0.104790 | 0.655488 | 0.429663 |
| 0 | 0189 | 0.434431 | 0.158945 | 0.925265 |
| 0 | 0190 | 0.929272 | 0.166050 | 0.574304 |
| 0 | 0191 | 0.597832 | 0.661073 | 0.060674 |
| 0 | 0192 | 0.940762 | 0.334386 | 0.560221 |
| 0 | 0193 | 0.600647 | 0.829859 | 0.070365 |
| 0 | 0194 | 0.134418 | 0.840121 | 0.235466 |
| 0 | 0195 | 0.398453 | 0.341751 | 0.745443 |
| 0 | 0196 | 0.141409 | 0.664828 | 0.240843 |
| 0 | 0197 | 0.396287 | 0.164941 | 0.736599 |
| 0 | 0198 | 0.899097 | 0.144353 | 0.763649 |
| 0 | 0199 | 0.634702 | 0.644074 | 0.250512 |
| 0 | 0200 | 0.895501 | 0.322871 | 0.744484 |
| 0 | 0201 | 0.637862 | 0.827734 | 0.259993 |
| 0 | 0202 | 0.221239 | 0.753966 | 0.162490 |
| 0 | 0203 | 0.315773 | 0.256039 | 0.663238 |
| 0 | 0204 | 0.817141 | 0.236653 | 0.832641 |
| 0 | 0205 | 0.716485 | 0.740093 | 0.348294 |

|    |       |          |          |          |
|----|-------|----------|----------|----------|
| O  | O206  | 0.809731 | 0.739168 | 0.531596 |
| Al | Al207 | 0.710985 | 0.656410 | 0.301743 |
| Si | Si208 | 0.437223 | 0.048480 | 0.176387 |
| Si | Si209 | 0.096331 | 0.549382 | 0.680048 |
| Si | Si210 | 0.447772 | 0.439228 | 0.167573 |
| Si | Si211 | 0.088104 | 0.939238 | 0.663199 |
| Si | Si212 | 0.596660 | 0.940439 | 0.820939 |
| Si | Si213 | 0.942844 | 0.435801 | 0.309066 |
| Si | Si214 | 0.590065 | 0.551427 | 0.822207 |
| Si | Si215 | 0.947453 | 0.047933 | 0.333634 |
| Si | Si216 | 0.333073 | 0.026362 | 0.336805 |
| Si | Si217 | 0.199938 | 0.528030 | 0.840824 |
| Si | Si218 | 0.334310 | 0.472029 | 0.316585 |
| Si | Si219 | 0.205450 | 0.969623 | 0.810091 |
| Si | Si220 | 0.701780 | 0.963938 | 0.661510 |
| Si | Si221 | 0.840481 | 0.461142 | 0.148039 |
| Si | Si222 | 0.702833 | 0.515154 | 0.674945 |
| Si | Si223 | 0.828851 | 0.019674 | 0.186784 |
| Si | Si224 | 0.296761 | 0.059425 | 0.552998 |
| Si | Si225 | 0.238707 | 0.556744 | 0.055714 |
| Si | Si226 | 0.294416 | 0.438733 | 0.532414 |
| Si | Si227 | 0.241127 | 0.935101 | 0.026795 |
| Si | Si228 | 0.738049 | 0.935593 | 0.445542 |
| Si | Si229 | 0.800096 | 0.434619 | 0.933207 |
| Si | Si230 | 0.745553 | 0.549183 | 0.461463 |
| Si | Si231 | 0.792871 | 0.054782 | 0.971019 |
| Si | Si232 | 0.141896 | 0.057642 | 0.531351 |
| Si | Si233 | 0.392294 | 0.556849 | 0.034622 |
| Si | Si234 | 0.140267 | 0.430689 | 0.534494 |
| Si | Si235 | 0.395451 | 0.928879 | 0.031259 |
| Si | Si236 | 0.892509 | 0.930682 | 0.465325 |
| Si | Si237 | 0.645603 | 0.432529 | 0.953586 |
| Si | Si238 | 0.898202 | 0.553334 | 0.456087 |
| Si | Si239 | 0.638689 | 0.060506 | 0.965362 |
| Si | Si240 | 0.095578 | 0.022106 | 0.319890 |
| Si | Si241 | 0.440816 | 0.524555 | 0.823973 |
| Si | Si242 | 0.091878 | 0.468792 | 0.322093 |
| Si | Si243 | 0.447015 | 0.970513 | 0.820759 |
| Si | Si244 | 0.939518 | 0.966196 | 0.675531 |
| Si | Si245 | 0.596911 | 0.463070 | 0.164161 |
| Si | Si246 | 0.947127 | 0.519989 | 0.667062 |
| Si | Si247 | 0.586807 | 0.020073 | 0.174778 |
| Si | Si248 | 0.215339 | 0.050059 | 0.187152 |
| Si | Si249 | 0.319158 | 0.553446 | 0.692505 |



|    |       |          |          |          |
|----|-------|----------|----------|----------|
| Si | Si250 | 0.209892 | 0.431956 | 0.189217 |
| Si | Si251 | 0.330995 | 0.934375 | 0.684195 |
| Si | Si252 | 0.820157 | 0.940011 | 0.810258 |
| Si | Si253 | 0.720601 | 0.437538 | 0.293607 |
| Si | Si254 | 0.827777 | 0.559490 | 0.796494 |
| Si | Si255 | 0.703229 | 0.059226 | 0.311579 |
| Si | Si256 | 0.442994 | 0.821132 | 0.177576 |
| Si | Si257 | 0.091898 | 0.322586 | 0.679179 |
| Si | Si258 | 0.440190 | 0.664233 | 0.183926 |
| Si | Si259 | 0.094069 | 0.165312 | 0.683181 |
| Si | Si260 | 0.591903 | 0.168096 | 0.815783 |
| Si | Si261 | 0.944052 | 0.665631 | 0.311541 |
| Si | Si262 | 0.595830 | 0.323882 | 0.804824 |
| Si | Si263 | 0.938784 | 0.822530 | 0.314862 |
| Si | Si264 | 0.329225 | 0.868601 | 0.323661 |
| Si | Si265 | 0.203444 | 0.369394 | 0.828514 |
| Si | Si266 | 0.331126 | 0.630557 | 0.336938 |
| Si | Si267 | 0.206617 | 0.128245 | 0.831614 |
| Si | Si268 | 0.705242 | 0.122013 | 0.670020 |
| Si | Si269 | 0.837504 | 0.619979 | 0.159304 |
| Si | Si270 | 0.705372 | 0.358688 | 0.657639 |
| Si | Si271 | 0.827252 | 0.860782 | 0.165667 |
| Si | Si272 | 0.289588 | 0.821651 | 0.535889 |
| Si | Si273 | 0.246745 | 0.319368 | 0.036207 |
| Si | Si274 | 0.291039 | 0.666213 | 0.551698 |
| Si | Si275 | 0.246875 | 0.163446 | 0.046296 |
| Si | Si276 | 0.746427 | 0.170772 | 0.457973 |
| Si | Si277 | 0.790414 | 0.669124 | 0.952073 |
| Si | Si278 | 0.750359 | 0.327476 | 0.444442 |
| Si | Si279 | 0.787898 | 0.826052 | 0.950171 |
| Si | Si280 | 0.135672 | 0.818756 | 0.535805 |
| Si | Si281 | 0.400700 | 0.318723 | 0.036507 |
| Si | Si282 | 0.137263 | 0.665100 | 0.538117 |
| Si | Si283 | 0.400629 | 0.165299 | 0.033635 |
| Si | Si284 | 0.899870 | 0.168949 | 0.462220 |
| Si | Si285 | 0.636452 | 0.669687 | 0.956598 |
| Si | Si286 | 0.903753 | 0.322856 | 0.455225 |
| Si | Si287 | 0.634667 | 0.823551 | 0.962006 |
| Si | Si288 | 0.087590 | 0.864965 | 0.325471 |
| Si | Si289 | 0.449775 | 0.367529 | 0.828895 |
| Si | Si290 | 0.093581 | 0.626974 | 0.318605 |
| Si | Si291 | 0.444736 | 0.128339 | 0.815002 |
| Si | Si292 | 0.946360 | 0.122519 | 0.672642 |
| Si | Si293 | 0.586988 | 0.619862 | 0.164294 |

|    |       |          |          |          |
|----|-------|----------|----------|----------|
| Si | Si294 | 0.945818 | 0.362602 | 0.672712 |
| Si | Si295 | 0.589447 | 0.862174 | 0.179379 |
| Si | Si296 | 0.206669 | 0.831714 | 0.185633 |
| Si | Si297 | 0.327749 | 0.333494 | 0.691841 |
| Si | Si298 | 0.215700 | 0.677915 | 0.201833 |
| Si | Si299 | 0.322032 | 0.179203 | 0.698212 |
| Si | Si300 | 0.827235 | 0.157991 | 0.811437 |
| Si | Si301 | 0.822261 | 0.311510 | 0.788606 |
| Si | Si302 | 0.711531 | 0.813961 | 0.300527 |
| Zn | Zn303 | 0.705347 | 0.716845 | 0.504454 |

**TS-C<sub>4</sub>H<sub>7</sub>ZnOH<sub>2</sub>-HTransfer-Concerted-ZnOH<sup>+</sup> (Fig. 8/TS2 in Blue)**

Total energy = -1928.47936754 eV

data\_

\_audit\_creation\_method 'Materials Studio'

\_cell\_length\_a 20.357621

\_cell\_length\_b 20.050598

\_cell\_length\_c 13.476578

\_cell\_angle\_alpha 90.000000

\_cell\_angle\_beta 90.000000

\_cell\_angle\_gamma 90.000000

\_symmetry\_space\_group\_name\_H-M 'P1'

loop\_

\_atom\_site\_type\_symbol

\_atom\_site\_label

\_atom\_site\_fract\_x

\_atom\_site\_fract\_y

\_atom\_site\_fract\_z

|   |     |          |          |          |
|---|-----|----------|----------|----------|
| H | H1  | 0.721891 | 0.764584 | 0.610240 |
| H | H2  | 0.633374 | 0.750686 | 0.652390 |
| H | H3  | 0.529003 | 0.670740 | 0.480908 |
| H | H4  | 0.542468 | 0.753024 | 0.429560 |
| H | H5  | 0.523847 | 0.804084 | 0.587068 |
| H | H6  | 0.591625 | 0.760193 | 0.658559 |
| H | H7  | 0.439021 | 0.796865 | 0.717610 |
| H | H8  | 0.412213 | 0.713864 | 0.762395 |
| H | H9  | 0.493371 | 0.659320 | 0.655553 |
| C | C10 | 0.550241 | 0.720110 | 0.493193 |
| C | C11 | 0.530137 | 0.750067 | 0.586121 |
| C | C12 | 0.444779 | 0.742996 | 0.715664 |
| C | C13 | 0.488996 | 0.713407 | 0.656269 |
| O | O14 | 0.486790 | 0.025652 | 0.209547 |
| O | O15 | 0.997023 | 0.529329 | 0.708476 |

|   |     |          |          |          |
|---|-----|----------|----------|----------|
| 0 | 016 | 0.502128 | 0.435151 | 0.205817 |
| 0 | 017 | 0.985791 | 0.938783 | 0.704666 |
| 0 | 018 | 0.491720 | 0.953707 | 0.789878 |
| 0 | 019 | 0.995581 | 0.453138 | 0.292713 |
| 0 | 020 | 0.490111 | 0.540210 | 0.789419 |
| 0 | 021 | 0.995887 | 0.040112 | 0.289751 |
| 0 | 022 | 0.370296 | 0.057053 | 0.281497 |
| 0 | 023 | 0.112719 | 0.555596 | 0.788207 |
| 0 | 024 | 0.381842 | 0.454437 | 0.272273 |
| 0 | 025 | 0.106794 | 0.956779 | 0.767141 |
| 0 | 026 | 0.607624 | 0.933416 | 0.710332 |
| 0 | 027 | 0.881746 | 0.432896 | 0.205709 |
| 0 | 028 | 0.610600 | 0.531457 | 0.723219 |
| 0 | 029 | 0.871568 | 0.033907 | 0.237261 |
| 0 | 030 | 0.411178 | 0.110908 | 0.112167 |
| 0 | 031 | 0.077591 | 0.614758 | 0.620836 |
| 0 | 032 | 0.405958 | 0.360145 | 0.138037 |
| 0 | 033 | 0.080265 | 0.863765 | 0.632051 |
| 0 | 034 | 0.573319 | 0.867240 | 0.872179 |
| 0 | 035 | 0.912562 | 0.362634 | 0.364308 |
| 0 | 036 | 0.580606 | 0.620537 | 0.860743 |
| 0 | 037 | 0.910256 | 0.116102 | 0.382089 |
| 0 | 038 | 0.376975 | 0.982481 | 0.121775 |
| 0 | 039 | 0.108025 | 0.485425 | 0.623643 |
| 0 | 040 | 0.412500 | 0.487953 | 0.086598 |
| 0 | 041 | 0.073325 | 0.992431 | 0.583504 |
| 0 | 042 | 0.600709 | 0.997055 | 0.881021 |
| 0 | 043 | 0.884010 | 0.490795 | 0.382425 |
| 0 | 044 | 0.581791 | 0.490704 | 0.906873 |
| 0 | 045 | 0.910843 | 0.984787 | 0.411131 |
| 0 | 046 | 0.305255 | 0.061638 | 0.449526 |
| 0 | 047 | 0.180687 | 0.560769 | 0.953904 |
| 0 | 048 | 0.313412 | 0.442614 | 0.435867 |
| 0 | 049 | 0.174351 | 0.940770 | 0.930701 |
| 0 | 050 | 0.678524 | 0.921928 | 0.549952 |
| 0 | 051 | 0.813774 | 0.419248 | 0.041012 |
| 0 | 052 | 0.682291 | 0.530200 | 0.563438 |
| 0 | 053 | 0.806599 | 0.040327 | 0.069756 |
| 0 | 054 | 0.320704 | 0.945428 | 0.359116 |
| 0 | 055 | 0.165921 | 0.444845 | 0.861249 |
| 0 | 056 | 0.296355 | 0.549243 | 0.322430 |
| 0 | 057 | 0.194144 | 0.048719 | 0.820872 |
| 0 | 058 | 0.668473 | 0.040437 | 0.636075 |
| 0 | 059 | 0.823645 | 0.538252 | 0.123797 |

|   |      |          |          |          |
|---|------|----------|----------|----------|
| 0 | 060  | 0.694151 | 0.431747 | 0.692569 |
| 0 | 061  | 0.790093 | 0.935122 | 0.186513 |
| 0 | 062  | 0.240698 | 0.036366 | 0.283420 |
| 0 | 063  | 0.242945 | 0.538539 | 0.785490 |
| 0 | 064  | 0.253149 | 0.432288 | 0.261807 |
| 0 | 065  | 0.234926 | 0.931907 | 0.756510 |
| 0 | 066  | 0.738463 | 0.944095 | 0.719167 |
| 0 | 067  | 0.750895 | 0.443329 | 0.207593 |
| 0 | 068  | 0.739605 | 0.551249 | 0.737795 |
| 0 | 069  | 0.742559 | 0.052249 | 0.239481 |
| 0 | 070  | 0.273199 | 0.129720 | 0.609701 |
| 0 | 071  | 0.217032 | 0.628696 | 0.112809 |
| 0 | 072  | 0.309028 | 0.374980 | 0.599784 |
| 0 | 073  | 0.178450 | 0.871975 | 0.094044 |
| 0 | 074  | 0.701973 | 0.861882 | 0.382724 |
| 0 | 075  | 0.781327 | 0.356660 | 0.876734 |
| 0 | 076  | 0.686273 | 0.617225 | 0.420888 |
| 0 | 077  | 0.794845 | 0.115120 | 0.912834 |
| 0 | 078  | 0.192547 | 0.035723 | 0.541606 |
| 0 | 079  | 0.295048 | 0.534191 | 0.040440 |
| 0 | 080  | 0.196860 | 0.420408 | 0.516333 |
| 0 | 081  | 0.290454 | 0.917323 | 0.010924 |
| 0 | 082  | 0.790226 | 0.946644 | 0.452632 |
| 0 | 083  | 0.698982 | 0.444862 | 0.954368 |
| 0 | 084  | 0.798774 | 0.561840 | 0.488231 |
| 0 | 085  | 0.688142 | 0.059340 | 0.993222 |
| 0 | 086  | 0.305035 | 0.001944 | 0.625175 |
| 0 | 087  | 0.183783 | 0.501059 | 0.128813 |
| 0 | 088  | 0.278805 | 0.503648 | 0.602739 |
| 0 | 089  | 0.209106 | 0.000612 | 0.098901 |
| 0 | 090  | 0.676472 | 0.991770 | 0.383955 |
| 0 | 091  | 0.810171 | 0.485827 | 0.871952 |
| 0 | 092  | 0.715455 | 0.490917 | 0.382802 |
| 0 | 093  | 0.774431 | 0.985006 | 0.897956 |
| 0 | 094  | 0.101031 | 0.122671 | 0.594679 |
| 0 | 095  | 0.385969 | 0.618105 | 0.104776 |
| 0 | 096  | 0.094361 | 0.355811 | 0.588146 |
| 0 | 097  | 0.394207 | 0.853779 | 0.081760 |
| 0 | 098  | 0.880254 | 0.855718 | 0.402186 |
| 0 | 099  | 0.606757 | 0.360425 | 0.893169 |
| 0 | 0100 | 0.899714 | 0.621501 | 0.398294 |
| 0 | 0101 | 0.588903 | 0.126843 | 0.912620 |
| 0 | 0102 | 0.092308 | 0.062488 | 0.420159 |
| 0 | 0103 | 0.398438 | 0.563086 | 0.927011 |

|   |      |          |          |          |
|---|------|----------|----------|----------|
| 0 | 0104 | 0.076600 | 0.441572 | 0.444146 |
| 0 | 0105 | 0.410698 | 0.942514 | 0.941394 |
| 0 | 0106 | 0.888232 | 0.917121 | 0.575884 |
| 0 | 0107 | 0.595294 | 0.417687 | 0.068699 |
| 0 | 0108 | 0.919776 | 0.545293 | 0.554037 |
| 0 | 0109 | 0.566614 | 0.043172 | 0.058720 |
| 0 | 0110 | 0.116794 | 0.035622 | 0.228890 |
| 0 | 0111 | 0.368284 | 0.538810 | 0.736864 |
| 0 | 0112 | 0.121821 | 0.427419 | 0.260673 |
| 0 | 0113 | 0.366250 | 0.927638 | 0.757587 |
| 0 | 0114 | 0.864490 | 0.952174 | 0.763919 |
| 0 | 0115 | 0.625010 | 0.451881 | 0.254738 |
| 0 | 0116 | 0.870846 | 0.558342 | 0.736934 |
| 0 | 0117 | 0.611602 | 0.056187 | 0.243647 |
| 0 | 0118 | 0.074800 | 0.941260 | 0.350286 |
| 0 | 0119 | 0.411080 | 0.442197 | 0.853368 |
| 0 | 0120 | 0.086110 | 0.546267 | 0.326389 |
| 0 | 0121 | 0.400998 | 0.046997 | 0.822684 |
| 0 | 0122 | 0.913328 | 0.039491 | 0.636307 |
| 0 | 0123 | 0.567644 | 0.538431 | 0.132122 |
| 0 | 0124 | 0.904227 | 0.439258 | 0.669728 |
| 0 | 0125 | 0.581279 | 0.936950 | 0.173153 |
| 0 | 0126 | 0.196830 | 0.125117 | 0.152307 |
| 0 | 0127 | 0.290481 | 0.627994 | 0.657671 |
| 0 | 0128 | 0.190041 | 0.368143 | 0.120937 |
| 0 | 0129 | 0.300537 | 0.869140 | 0.616187 |
| 0 | 0130 | 0.790985 | 0.859847 | 0.847478 |
| 0 | 0131 | 0.700264 | 0.363384 | 0.344040 |
| 0 | 0132 | 0.802011 | 0.618840 | 0.876001 |
| 0 | 0133 | 0.680422 | 0.124001 | 0.374181 |
| 0 | 0134 | 0.492947 | 0.841949 | 0.210768 |
| 0 | 0135 | 0.992314 | 0.344928 | 0.711595 |
| 0 | 0136 | 0.496431 | 0.636465 | 0.208781 |
| 0 | 0137 | 0.994105 | 0.132733 | 0.706803 |
| 0 | 0138 | 0.490943 | 0.139638 | 0.781640 |
| 0 | 0139 | 0.002910 | 0.644867 | 0.281047 |
| 0 | 0140 | 0.494900 | 0.350281 | 0.789759 |
| 0 | 0141 | 0.989894 | 0.848272 | 0.292689 |
| 0 | 0142 | 0.372185 | 0.837619 | 0.274861 |
| 0 | 0143 | 0.111661 | 0.336225 | 0.781602 |
| 0 | 0144 | 0.383402 | 0.646923 | 0.298711 |
| 0 | 0145 | 0.110120 | 0.147613 | 0.789370 |
| 0 | 0146 | 0.612382 | 0.145451 | 0.720257 |
| 0 | 0147 | 0.888706 | 0.641091 | 0.200892 |

|   |      |          |          |          |
|---|------|----------|----------|----------|
| 0 | 0148 | 0.608476 | 0.331827 | 0.700036 |
| 0 | 0149 | 0.875141 | 0.836000 | 0.206500 |
| 0 | 0150 | 0.417009 | 0.737938 | 0.164151 |
| 0 | 0151 | 0.066096 | 0.239698 | 0.664504 |
| 0 | 0152 | 0.565937 | 0.243271 | 0.832899 |
| 0 | 0153 | 0.916975 | 0.740450 | 0.327446 |
| 0 | 0154 | 0.299243 | 0.824695 | 0.431163 |
| 0 | 0155 | 0.187625 | 0.324827 | 0.935142 |
| 0 | 0156 | 0.312931 | 0.642349 | 0.463327 |
| 0 | 0157 | 0.175858 | 0.143650 | 0.958584 |
| 0 | 0158 | 0.685538 | 0.161468 | 0.563493 |
| 0 | 0159 | 0.799867 | 0.660384 | 0.063298 |
| 0 | 0160 | 0.679802 | 0.348592 | 0.537446 |
| 0 | 0161 | 0.805836 | 0.843948 | 0.041825 |
| 0 | 0162 | 0.243763 | 0.862465 | 0.261188 |
| 0 | 0163 | 0.239549 | 0.359871 | 0.761592 |
| 0 | 0164 | 0.254895 | 0.671440 | 0.293012 |
| 0 | 0165 | 0.240058 | 0.169165 | 0.792951 |
| 0 | 0166 | 0.741438 | 0.126761 | 0.734755 |
| 0 | 0167 | 0.764608 | 0.623624 | 0.246540 |
| 0 | 0168 | 0.738027 | 0.309413 | 0.702453 |
| 0 | 0169 | 0.745552 | 0.813173 | 0.209272 |
| 0 | 0170 | 0.273125 | 0.743875 | 0.578598 |
| 0 | 0171 | 0.215856 | 0.242490 | 0.079426 |
| 0 | 0172 | 0.715280 | 0.245956 | 0.421695 |
| 0 | 0173 | 0.770590 | 0.742930 | 0.920575 |
| 0 | 0174 | 0.187266 | 0.838608 | 0.527550 |
| 0 | 0175 | 0.301367 | 0.336614 | 0.026917 |
| 0 | 0176 | 0.191215 | 0.644423 | 0.532033 |
| 0 | 0177 | 0.297072 | 0.143270 | 0.028436 |
| 0 | 0178 | 0.795687 | 0.144456 | 0.462679 |
| 0 | 0179 | 0.687690 | 0.645233 | 0.965607 |
| 0 | 0180 | 0.801093 | 0.342052 | 0.466409 |
| 0 | 0181 | 0.686856 | 0.841837 | 0.964254 |
| 0 | 0182 | 0.106134 | 0.740067 | 0.581688 |
| 0 | 0183 | 0.382821 | 0.237733 | 0.080045 |
| 0 | 0184 | 0.881201 | 0.241721 | 0.419531 |
| 0 | 0185 | 0.605066 | 0.743781 | 0.914207 |
| 0 | 0186 | 0.070496 | 0.825807 | 0.442619 |
| 0 | 0187 | 0.419683 | 0.327254 | 0.946561 |
| 0 | 0188 | 0.080136 | 0.656643 | 0.434700 |
| 0 | 0189 | 0.407857 | 0.158167 | 0.928711 |
| 0 | 0190 | 0.904757 | 0.161589 | 0.568891 |
| 0 | 0191 | 0.569458 | 0.656681 | 0.049925 |

|    |       |          |          |          |
|----|-------|----------|----------|----------|
| O  | O192  | 0.916561 | 0.332178 | 0.554594 |
| O  | O193  | 0.574064 | 0.828656 | 0.059409 |
| O  | O194  | 0.116539 | 0.832142 | 0.258035 |
| O  | O195  | 0.367343 | 0.332374 | 0.765749 |
| O  | O196  | 0.128523 | 0.659407 | 0.250853 |
| O  | O197  | 0.366013 | 0.161092 | 0.741356 |
| O  | O198  | 0.870182 | 0.135381 | 0.755789 |
| O  | O199  | 0.625163 | 0.639170 | 0.227072 |
| O  | O200  | 0.866237 | 0.321398 | 0.735719 |
| O  | O201  | 0.617669 | 0.820763 | 0.245547 |
| O  | O202  | 0.200838 | 0.753223 | 0.166187 |
| O  | O203  | 0.288282 | 0.253917 | 0.664561 |
| O  | O204  | 0.795398 | 0.231193 | 0.829863 |
| O  | O205  | 0.691690 | 0.735301 | 0.345292 |
| O  | O206  | 0.693821 | 0.725559 | 0.611288 |
| Al | Al207 | 0.693213 | 0.651971 | 0.298893 |
| Si | Si208 | 0.411728 | 0.044274 | 0.180277 |
| Si | Si209 | 0.073209 | 0.546248 | 0.684340 |
| Si | Si210 | 0.425199 | 0.434499 | 0.175712 |
| Si | Si211 | 0.062230 | 0.937878 | 0.671558 |
| Si | Si212 | 0.568065 | 0.937978 | 0.814801 |
| Si | Si213 | 0.918940 | 0.435231 | 0.311883 |
| Si | Si214 | 0.566666 | 0.545609 | 0.821290 |
| Si | Si215 | 0.921088 | 0.044044 | 0.330079 |
| Si | Si216 | 0.309163 | 0.024922 | 0.342497 |
| Si | Si217 | 0.175541 | 0.524712 | 0.846486 |
| Si | Si218 | 0.311217 | 0.469520 | 0.322883 |
| Si | Si219 | 0.177478 | 0.969487 | 0.818755 |
| Si | Si220 | 0.673239 | 0.960738 | 0.655303 |
| Si | Si221 | 0.817548 | 0.459078 | 0.145826 |
| Si | Si222 | 0.682167 | 0.511533 | 0.679603 |
| Si | Si223 | 0.802883 | 0.015231 | 0.183613 |
| Si | Si224 | 0.268966 | 0.057522 | 0.556452 |
| Si | Si225 | 0.219124 | 0.556454 | 0.059183 |
| Si | Si226 | 0.274001 | 0.435161 | 0.539334 |
| Si | Si227 | 0.213368 | 0.932540 | 0.034465 |
| Si | Si228 | 0.712178 | 0.930959 | 0.441505 |
| Si | Si229 | 0.775974 | 0.426632 | 0.935662 |
| Si | Si230 | 0.721311 | 0.550185 | 0.463416 |
| Si | Si231 | 0.765794 | 0.049981 | 0.967923 |
| Si | Si232 | 0.114746 | 0.053702 | 0.535071 |
| Si | Si233 | 0.373176 | 0.551209 | 0.040261 |
| Si | Si234 | 0.119249 | 0.426256 | 0.542789 |
| Si | Si235 | 0.367684 | 0.924350 | 0.038791 |

|    |       |          |          |          |
|----|-------|----------|----------|----------|
| Si | Si236 | 0.867273 | 0.925589 | 0.460118 |
| Si | Si237 | 0.620978 | 0.428147 | 0.955732 |
| Si | Si238 | 0.875168 | 0.554970 | 0.455046 |
| Si | Si239 | 0.611373 | 0.056559 | 0.961448 |
| Si | Si240 | 0.069751 | 0.019897 | 0.322733 |
| Si | Si241 | 0.417182 | 0.520887 | 0.827459 |
| Si | Si242 | 0.069872 | 0.467111 | 0.330264 |
| Si | Si243 | 0.417408 | 0.967975 | 0.827597 |
| Si | Si244 | 0.913046 | 0.961666 | 0.670047 |
| Si | Si245 | 0.572822 | 0.461165 | 0.165409 |
| Si | Si246 | 0.922728 | 0.518230 | 0.667739 |
| Si | Si247 | 0.561802 | 0.015548 | 0.171900 |
| Si | Si248 | 0.191057 | 0.048914 | 0.191381 |
| Si | Si249 | 0.294671 | 0.551479 | 0.696504 |
| Si | Si250 | 0.187494 | 0.432571 | 0.193058 |
| Si | Si251 | 0.300987 | 0.933268 | 0.688861 |
| Si | Si252 | 0.792165 | 0.935821 | 0.806829 |
| Si | Si253 | 0.698049 | 0.437813 | 0.296597 |
| Si | Si254 | 0.805539 | 0.553452 | 0.805894 |
| Si | Si255 | 0.678064 | 0.055797 | 0.309997 |
| Si | Si256 | 0.419174 | 0.817358 | 0.182848 |
| Si | Si257 | 0.066026 | 0.318964 | 0.686579 |
| Si | Si258 | 0.421282 | 0.659769 | 0.193762 |
| Si | Si259 | 0.067828 | 0.160867 | 0.688856 |
| Si | Si260 | 0.564447 | 0.164030 | 0.811848 |
| Si | Si261 | 0.926356 | 0.661982 | 0.301828 |
| Si | Si262 | 0.568901 | 0.321507 | 0.804082 |
| Si | Si263 | 0.915895 | 0.819711 | 0.307480 |
| Si | Si264 | 0.308687 | 0.867730 | 0.330740 |
| Si | Si265 | 0.176323 | 0.366744 | 0.834298 |
| Si | Si266 | 0.312375 | 0.627255 | 0.344842 |
| Si | Si267 | 0.179363 | 0.127275 | 0.840699 |
| Si | Si268 | 0.677305 | 0.118659 | 0.664324 |
| Si | Si269 | 0.817647 | 0.615619 | 0.160160 |
| Si | Si270 | 0.679505 | 0.355564 | 0.657385 |
| Si | Si271 | 0.804548 | 0.857151 | 0.160470 |
| Si | Si272 | 0.264632 | 0.819428 | 0.538948 |
| Si | Si273 | 0.223881 | 0.318596 | 0.041535 |
| Si | Si274 | 0.267027 | 0.664793 | 0.556608 |
| Si | Si275 | 0.221267 | 0.163922 | 0.053616 |
| Si | Si276 | 0.719347 | 0.168767 | 0.455094 |
| Si | Si277 | 0.765023 | 0.665924 | 0.956089 |
| Si | Si278 | 0.724131 | 0.324861 | 0.443053 |
| Si | Si279 | 0.763559 | 0.821351 | 0.944862 |



|    |       |          |          |          |
|----|-------|----------|----------|----------|
| Si | Si280 | 0.110899 | 0.817169 | 0.545737 |
| Si | Si281 | 0.377550 | 0.315625 | 0.047704 |
| Si | Si282 | 0.113750 | 0.663730 | 0.542772 |
| Si | Si283 | 0.374611 | 0.162365 | 0.037780 |
| Si | Si284 | 0.873008 | 0.165638 | 0.458247 |
| Si | Si285 | 0.611078 | 0.666244 | 0.948569 |
| Si | Si286 | 0.877621 | 0.319795 | 0.451270 |
| Si | Si287 | 0.610048 | 0.820136 | 0.952772 |
| Si | Si288 | 0.063064 | 0.862003 | 0.335317 |
| Si | Si289 | 0.423084 | 0.363013 | 0.838420 |
| Si | Si290 | 0.074547 | 0.626255 | 0.323540 |
| Si | Si291 | 0.416345 | 0.126415 | 0.818781 |
| Si | Si292 | 0.920518 | 0.117430 | 0.667108 |
| Si | Si293 | 0.566509 | 0.618024 | 0.156603 |
| Si | Si294 | 0.919620 | 0.359832 | 0.667711 |
| Si | Si295 | 0.566652 | 0.857251 | 0.171441 |
| Si | Si296 | 0.184688 | 0.829634 | 0.196062 |
| Si | Si297 | 0.301164 | 0.330184 | 0.699069 |
| Si | Si298 | 0.199915 | 0.676942 | 0.205653 |
| Si | Si299 | 0.292347 | 0.177408 | 0.702274 |
| Si | Si300 | 0.800300 | 0.152462 | 0.806863 |
| Si | Si301 | 0.795683 | 0.306155 | 0.786193 |
| Si | Si302 | 0.689307 | 0.808444 | 0.294938 |
| Zn | Zn303 | 0.649590 | 0.704326 | 0.487918 |

**C<sub>4</sub>H<sub>6</sub>-Phys.Ads-H<sub>2</sub>-Phys.Ads-ZnOH<sup>+</sup> (Fig. 8/M3 in Blue)**

Total energy = -1929.89021364 eV

data\_

\_audit\_creation\_method 'Materials Studio'

\_cell\_length\_a 20.357621

\_cell\_length\_b 20.050598

\_cell\_length\_c 13.476578

\_cell\_angle\_alpha 90.000000

\_cell\_angle\_beta 90.000000

\_cell\_angle\_gamma 90.000000

\_symmetry\_space\_group\_name\_H-M 'P1'

loop\_

\_atom\_site\_type\_symbol

\_atom\_site\_label

\_atom\_site\_fract\_x

\_atom\_site\_fract\_y

\_atom\_site\_fract\_z

|   |    |          |          |          |
|---|----|----------|----------|----------|
| H | H1 | 0.818532 | 0.766046 | 0.611708 |
|---|----|----------|----------|----------|

|   |     |          |          |          |
|---|-----|----------|----------|----------|
| H | H2  | 0.550148 | 0.546073 | 0.438128 |
| H | H3  | 0.547468 | 0.531149 | 0.488143 |
| H | H4  | 0.679399 | 0.713566 | 0.682434 |
| H | H5  | 0.660985 | 0.798039 | 0.634251 |
| H | H6  | 0.594859 | 0.665091 | 0.575685 |
| H | H7  | 0.568756 | 0.811093 | 0.507320 |
| H | H8  | 0.497363 | 0.677535 | 0.469271 |
| H | H9  | 0.473524 | 0.761063 | 0.423201 |
| C | C10 | 0.654055 | 0.744465 | 0.628275 |
| C | C11 | 0.603745 | 0.718670 | 0.573052 |
| C | C12 | 0.559631 | 0.757644 | 0.512112 |
| C | C13 | 0.507566 | 0.730664 | 0.465354 |
| O | O14 | 0.515743 | 0.032681 | 0.215957 |
| O | O15 | 0.027044 | 0.533232 | 0.713029 |
| O | O16 | 0.518551 | 0.442698 | 0.210058 |
| O | O17 | 0.010653 | 0.930471 | 0.702835 |
| O | O18 | 0.514248 | 0.945880 | 0.788484 |
| O | O19 | 0.011469 | 0.457004 | 0.288129 |
| O | O20 | 0.519103 | 0.536702 | 0.789335 |
| O | O21 | 0.020438 | 0.043190 | 0.293050 |
| O | O22 | 0.399133 | 0.058269 | 0.290943 |
| O | O23 | 0.149641 | 0.562349 | 0.758269 |
| O | O24 | 0.391747 | 0.430873 | 0.248245 |
| O | O25 | 0.127329 | 0.944381 | 0.783621 |
| O | O26 | 0.630161 | 0.936528 | 0.706525 |
| O | O27 | 0.889772 | 0.430440 | 0.235179 |
| O | O28 | 0.645052 | 0.549354 | 0.753368 |
| O | O29 | 0.900007 | 0.037803 | 0.226205 |
| O | O30 | 0.437488 | 0.121431 | 0.128644 |
| O | O31 | 0.095501 | 0.613999 | 0.596980 |
| O | O32 | 0.446310 | 0.365981 | 0.096962 |
| O | O33 | 0.110759 | 0.860359 | 0.633921 |
| O | O34 | 0.601616 | 0.858261 | 0.856994 |
| O | O35 | 0.941546 | 0.370483 | 0.391901 |
| O | O36 | 0.589991 | 0.615676 | 0.902326 |
| O | O37 | 0.930303 | 0.120963 | 0.373917 |
| O | O38 | 0.407310 | 0.993101 | 0.121508 |
| O | O39 | 0.124934 | 0.484696 | 0.604237 |
| O | O40 | 0.433130 | 0.497567 | 0.087509 |
| O | O41 | 0.104466 | 0.990482 | 0.600459 |
| O | O42 | 0.620873 | 0.987560 | 0.887128 |
| O | O43 | 0.911269 | 0.499425 | 0.398545 |
| O | O44 | 0.603297 | 0.483724 | 0.914762 |
| O | O45 | 0.929309 | 0.990472 | 0.407150 |

|   |     |          |          |          |
|---|-----|----------|----------|----------|
| 0 | 046 | 0.337863 | 0.040967 | 0.460032 |
| 0 | 047 | 0.201483 | 0.552079 | 0.936066 |
| 0 | 048 | 0.337889 | 0.443792 | 0.426133 |
| 0 | 049 | 0.194697 | 0.949138 | 0.950135 |
| 0 | 050 | 0.697137 | 0.933417 | 0.544182 |
| 0 | 051 | 0.833037 | 0.426387 | 0.061944 |
| 0 | 052 | 0.701191 | 0.536581 | 0.579643 |
| 0 | 053 | 0.834939 | 0.038196 | 0.056391 |
| 0 | 054 | 0.340179 | 0.943454 | 0.323705 |
| 0 | 055 | 0.193650 | 0.445242 | 0.818882 |
| 0 | 056 | 0.336033 | 0.544836 | 0.297807 |
| 0 | 057 | 0.208902 | 0.045288 | 0.813856 |
| 0 | 058 | 0.702148 | 0.042408 | 0.659577 |
| 0 | 059 | 0.845911 | 0.543194 | 0.152150 |
| 0 | 060 | 0.709459 | 0.437501 | 0.711086 |
| 0 | 061 | 0.823879 | 0.934733 | 0.180013 |
| 0 | 062 | 0.267984 | 0.051528 | 0.296096 |
| 0 | 063 | 0.278116 | 0.542625 | 0.779730 |
| 0 | 064 | 0.262043 | 0.438535 | 0.268697 |
| 0 | 065 | 0.256612 | 0.925377 | 0.780123 |
| 0 | 066 | 0.761422 | 0.931504 | 0.713576 |
| 0 | 067 | 0.761445 | 0.453368 | 0.219825 |
| 0 | 068 | 0.774569 | 0.550680 | 0.738459 |
| 0 | 069 | 0.770759 | 0.051114 | 0.225643 |
| 0 | 070 | 0.309173 | 0.119425 | 0.611827 |
| 0 | 071 | 0.229123 | 0.624625 | 0.092990 |
| 0 | 072 | 0.321213 | 0.363998 | 0.578403 |
| 0 | 073 | 0.216889 | 0.870334 | 0.103485 |
| 0 | 074 | 0.714491 | 0.874401 | 0.373569 |
| 0 | 075 | 0.810987 | 0.352983 | 0.904204 |
| 0 | 076 | 0.717412 | 0.631069 | 0.445592 |
| 0 | 077 | 0.808997 | 0.113395 | 0.899392 |
| 0 | 078 | 0.218859 | 0.036360 | 0.537923 |
| 0 | 079 | 0.315997 | 0.536084 | 0.028132 |
| 0 | 080 | 0.218146 | 0.425745 | 0.499058 |
| 0 | 081 | 0.316167 | 0.933703 | 0.013036 |
| 0 | 082 | 0.812523 | 0.945564 | 0.453349 |
| 0 | 083 | 0.720301 | 0.439460 | 0.964857 |
| 0 | 084 | 0.819833 | 0.558743 | 0.505346 |
| 0 | 085 | 0.712667 | 0.049025 | 0.992835 |
| 0 | 086 | 0.321093 | 0.989065 | 0.636960 |
| 0 | 087 | 0.205782 | 0.494679 | 0.111418 |
| 0 | 088 | 0.305293 | 0.494562 | 0.600903 |
| 0 | 089 | 0.231378 | 0.000354 | 0.123196 |

|   |      |          |          |          |
|---|------|----------|----------|----------|
| 0 | 090  | 0.706965 | 0.005943 | 0.383897 |
| 0 | 091  | 0.831212 | 0.482301 | 0.884083 |
| 0 | 092  | 0.726268 | 0.504248 | 0.393468 |
| 0 | 093  | 0.798689 | 0.982402 | 0.886323 |
| 0 | 094  | 0.129473 | 0.121055 | 0.604561 |
| 0 | 095  | 0.404624 | 0.627268 | 0.081161 |
| 0 | 096  | 0.123183 | 0.353181 | 0.580731 |
| 0 | 097  | 0.410753 | 0.861900 | 0.093946 |
| 0 | 098  | 0.904369 | 0.860779 | 0.391957 |
| 0 | 099  | 0.626148 | 0.353340 | 0.914829 |
| 0 | 0100 | 0.913748 | 0.631252 | 0.417490 |
| 0 | 0101 | 0.620062 | 0.119518 | 0.903232 |
| 0 | 0102 | 0.109740 | 0.060252 | 0.434670 |
| 0 | 0103 | 0.420298 | 0.559428 | 0.914768 |
| 0 | 0104 | 0.096651 | 0.430957 | 0.429654 |
| 0 | 0105 | 0.439240 | 0.942822 | 0.947215 |
| 0 | 0106 | 0.915843 | 0.916764 | 0.568043 |
| 0 | 0107 | 0.617764 | 0.418918 | 0.084414 |
| 0 | 0108 | 0.941186 | 0.555557 | 0.571536 |
| 0 | 0109 | 0.590098 | 0.044659 | 0.057643 |
| 0 | 0110 | 0.143014 | 0.054691 | 0.243825 |
| 0 | 0111 | 0.400676 | 0.536999 | 0.720608 |
| 0 | 0112 | 0.133800 | 0.428104 | 0.240317 |
| 0 | 0113 | 0.387395 | 0.920047 | 0.769857 |
| 0 | 0114 | 0.888311 | 0.943975 | 0.756787 |
| 0 | 0115 | 0.638015 | 0.448430 | 0.275611 |
| 0 | 0116 | 0.903595 | 0.554298 | 0.761563 |
| 0 | 0117 | 0.641176 | 0.063411 | 0.237354 |
| 0 | 0118 | 0.105843 | 0.945746 | 0.338453 |
| 0 | 0119 | 0.436447 | 0.438814 | 0.841075 |
| 0 | 0120 | 0.107649 | 0.543429 | 0.328886 |
| 0 | 0121 | 0.425546 | 0.041619 | 0.818213 |
| 0 | 0122 | 0.941939 | 0.035497 | 0.640162 |
| 0 | 0123 | 0.596233 | 0.541188 | 0.147534 |
| 0 | 0124 | 0.936040 | 0.441748 | 0.669903 |
| 0 | 0125 | 0.608536 | 0.941825 | 0.179407 |
| 0 | 0126 | 0.227191 | 0.130645 | 0.150838 |
| 0 | 0127 | 0.320889 | 0.622883 | 0.636246 |
| 0 | 0128 | 0.215364 | 0.362109 | 0.126265 |
| 0 | 0129 | 0.315647 | 0.855835 | 0.640883 |
| 0 | 0130 | 0.815640 | 0.854793 | 0.849009 |
| 0 | 0131 | 0.725285 | 0.373111 | 0.366001 |
| 0 | 0132 | 0.827063 | 0.615257 | 0.888984 |
| 0 | 0133 | 0.716834 | 0.135883 | 0.352437 |

|   |      |          |          |          |
|---|------|----------|----------|----------|
| 0 | 0134 | 0.517722 | 0.848763 | 0.208437 |
| 0 | 0135 | 0.027112 | 0.350947 | 0.715553 |
| 0 | 0136 | 0.507058 | 0.630172 | 0.203712 |
| 0 | 0137 | 0.018906 | 0.131134 | 0.710621 |
| 0 | 0138 | 0.517568 | 0.132471 | 0.780780 |
| 0 | 0139 | 0.013778 | 0.631793 | 0.289594 |
| 0 | 0140 | 0.526175 | 0.349637 | 0.786380 |
| 0 | 0141 | 0.016170 | 0.855603 | 0.288606 |
| 0 | 0142 | 0.401162 | 0.828930 | 0.283942 |
| 0 | 0143 | 0.149730 | 0.326063 | 0.769158 |
| 0 | 0144 | 0.389299 | 0.662312 | 0.271359 |
| 0 | 0145 | 0.133265 | 0.153168 | 0.795305 |
| 0 | 0146 | 0.636176 | 0.150980 | 0.713067 |
| 0 | 0147 | 0.894763 | 0.654677 | 0.224967 |
| 0 | 0148 | 0.646334 | 0.323458 | 0.723875 |
| 0 | 0149 | 0.903274 | 0.829384 | 0.201978 |
| 0 | 0150 | 0.448791 | 0.743275 | 0.148635 |
| 0 | 0151 | 0.086601 | 0.238654 | 0.659554 |
| 0 | 0152 | 0.586220 | 0.238172 | 0.842192 |
| 0 | 0153 | 0.953183 | 0.744808 | 0.337232 |
| 0 | 0154 | 0.335128 | 0.842067 | 0.448508 |
| 0 | 0155 | 0.213803 | 0.340212 | 0.934190 |
| 0 | 0156 | 0.331721 | 0.636529 | 0.441924 |
| 0 | 0157 | 0.204821 | 0.136732 | 0.956972 |
| 0 | 0158 | 0.702129 | 0.150678 | 0.547204 |
| 0 | 0159 | 0.818290 | 0.660746 | 0.072463 |
| 0 | 0160 | 0.708644 | 0.352599 | 0.557598 |
| 0 | 0161 | 0.829270 | 0.838515 | 0.043151 |
| 0 | 0162 | 0.270725 | 0.836828 | 0.277097 |
| 0 | 0163 | 0.278545 | 0.352326 | 0.764619 |
| 0 | 0164 | 0.258440 | 0.650804 | 0.282297 |
| 0 | 0165 | 0.263690 | 0.162912 | 0.786492 |
| 0 | 0166 | 0.766545 | 0.149101 | 0.718778 |
| 0 | 0167 | 0.766839 | 0.628321 | 0.246638 |
| 0 | 0168 | 0.777653 | 0.325053 | 0.717258 |
| 0 | 0169 | 0.773572 | 0.816434 | 0.218136 |
| 0 | 0170 | 0.299187 | 0.739197 | 0.557701 |
| 0 | 0171 | 0.244083 | 0.243263 | 0.058730 |
| 0 | 0172 | 0.738459 | 0.252191 | 0.434595 |
| 0 | 0173 | 0.790782 | 0.738865 | 0.922211 |
| 0 | 0174 | 0.214114 | 0.836936 | 0.518551 |
| 0 | 0175 | 0.327566 | 0.342882 | 0.028423 |
| 0 | 0176 | 0.214012 | 0.640293 | 0.526226 |
| 0 | 0177 | 0.326711 | 0.142228 | 0.024894 |

|    |       |          |          |          |
|----|-------|----------|----------|----------|
| O  | O178  | 0.820913 | 0.151139 | 0.470215 |
| O  | O179  | 0.709455 | 0.639840 | 0.967099 |
| O  | O180  | 0.827766 | 0.344370 | 0.480068 |
| O  | O181  | 0.710257 | 0.839754 | 0.965427 |
| O  | O182  | 0.131189 | 0.739547 | 0.568898 |
| O  | O183  | 0.409017 | 0.241375 | 0.067721 |
| O  | O184  | 0.909027 | 0.245470 | 0.427633 |
| O  | O185  | 0.626581 | 0.740415 | 0.929809 |
| O  | O186  | 0.095003 | 0.834161 | 0.441156 |
| O  | O187  | 0.431409 | 0.317409 | 0.913835 |
| O  | O188  | 0.109029 | 0.662519 | 0.414783 |
| O  | O189  | 0.441772 | 0.146945 | 0.936425 |
| O  | O190  | 0.934059 | 0.156146 | 0.566072 |
| O  | O191  | 0.606180 | 0.664580 | 0.085268 |
| O  | O192  | 0.938868 | 0.325268 | 0.577222 |
| O  | O193  | 0.593302 | 0.841912 | 0.050368 |
| O  | O194  | 0.141819 | 0.831901 | 0.255921 |
| O  | O195  | 0.404387 | 0.336509 | 0.723494 |
| O  | O196  | 0.134469 | 0.651589 | 0.223088 |
| O  | O197  | 0.392001 | 0.160352 | 0.753933 |
| O  | O198  | 0.893197 | 0.132029 | 0.751906 |
| O  | O199  | 0.626737 | 0.637816 | 0.276865 |
| O  | O200  | 0.903528 | 0.332197 | 0.767306 |
| O  | O201  | 0.643966 | 0.819786 | 0.228999 |
| O  | O202  | 0.216627 | 0.745857 | 0.160372 |
| O  | O203  | 0.317559 | 0.246296 | 0.659504 |
| O  | O204  | 0.830262 | 0.233489 | 0.834651 |
| O  | O205  | 0.710662 | 0.744129 | 0.353308 |
| O  | O206  | 0.805397 | 0.773375 | 0.543631 |
| Al | Al207 | 0.703887 | 0.657871 | 0.319477 |
| Si | Si208 | 0.440475 | 0.051412 | 0.188496 |
| Si | Si209 | 0.099191 | 0.548457 | 0.667433 |
| Si | Si210 | 0.446496 | 0.434642 | 0.160875 |
| Si | Si211 | 0.088658 | 0.931602 | 0.679944 |
| Si | Si212 | 0.591177 | 0.932428 | 0.811157 |
| Si | Si213 | 0.938580 | 0.439443 | 0.328911 |
| Si | Si214 | 0.590349 | 0.546118 | 0.840880 |
| Si | Si215 | 0.944081 | 0.048069 | 0.325462 |
| Si | Si216 | 0.336004 | 0.023277 | 0.342978 |
| Si | Si217 | 0.205760 | 0.525165 | 0.823214 |
| Si | Si218 | 0.332088 | 0.464402 | 0.310227 |
| Si | Si219 | 0.196957 | 0.965968 | 0.832497 |
| Si | Si220 | 0.698110 | 0.961891 | 0.656400 |
| Si | Si221 | 0.832645 | 0.464300 | 0.168116 |

|    |       |          |          |          |
|----|-------|----------|----------|----------|
| Si | Si222 | 0.707653 | 0.517764 | 0.695986 |
| Si | Si223 | 0.832548 | 0.015247 | 0.172001 |
| Si | Si224 | 0.296304 | 0.046980 | 0.562213 |
| Si | Si225 | 0.238306 | 0.552012 | 0.042484 |
| Si | Si226 | 0.295582 | 0.431954 | 0.526482 |
| Si | Si227 | 0.239695 | 0.938142 | 0.048112 |
| Si | Si228 | 0.733982 | 0.939245 | 0.438016 |
| Si | Si229 | 0.798576 | 0.425401 | 0.953992 |
| Si | Si230 | 0.741796 | 0.557116 | 0.480680 |
| Si | Si231 | 0.789278 | 0.046075 | 0.958372 |
| Si | Si232 | 0.140779 | 0.051941 | 0.544599 |
| Si | Si233 | 0.393492 | 0.555240 | 0.028085 |
| Si | Si234 | 0.140953 | 0.423947 | 0.528676 |
| Si | Si235 | 0.393176 | 0.933109 | 0.044095 |
| Si | Si236 | 0.890124 | 0.927534 | 0.455305 |
| Si | Si237 | 0.642230 | 0.423637 | 0.970093 |
| Si | Si238 | 0.896600 | 0.561469 | 0.472432 |
| Si | Si239 | 0.636027 | 0.050233 | 0.959747 |
| Si | Si240 | 0.094337 | 0.025585 | 0.328084 |
| Si | Si241 | 0.443930 | 0.517960 | 0.817374 |
| Si | Si242 | 0.087527 | 0.465005 | 0.321225 |
| Si | Si243 | 0.441586 | 0.962721 | 0.830468 |
| Si | Si244 | 0.939270 | 0.956591 | 0.666764 |
| Si | Si245 | 0.592938 | 0.463109 | 0.178974 |
| Si | Si246 | 0.951561 | 0.521083 | 0.679427 |
| Si | Si247 | 0.589117 | 0.020533 | 0.172935 |
| Si | Si248 | 0.217506 | 0.058725 | 0.203469 |
| Si | Si249 | 0.325935 | 0.548912 | 0.683966 |
| Si | Si250 | 0.204676 | 0.431164 | 0.186047 |
| Si | Si251 | 0.319774 | 0.923192 | 0.706621 |
| Si | Si252 | 0.816198 | 0.928788 | 0.800739 |
| Si | Si253 | 0.713117 | 0.444887 | 0.314209 |
| Si | Si254 | 0.833955 | 0.550248 | 0.819199 |
| Si | Si255 | 0.709272 | 0.063596 | 0.299589 |
| Si | Si256 | 0.444747 | 0.820428 | 0.183536 |
| Si | Si257 | 0.096313 | 0.317398 | 0.681136 |
| Si | Si258 | 0.438007 | 0.665195 | 0.175610 |
| Si | Si259 | 0.091844 | 0.161250 | 0.692573 |
| Si | Si260 | 0.589958 | 0.160509 | 0.809799 |
| Si | Si261 | 0.943573 | 0.665748 | 0.317518 |
| Si | Si262 | 0.596163 | 0.316457 | 0.817179 |
| Si | Si263 | 0.944300 | 0.822029 | 0.305299 |
| Si | Si264 | 0.336379 | 0.863109 | 0.332651 |
| Si | Si265 | 0.209361 | 0.366114 | 0.821239 |

|    |       |          |          |          |
|----|-------|----------|----------|----------|
| Si | Si266 | 0.328597 | 0.623424 | 0.323293 |
| Si | Si267 | 0.202301 | 0.124413 | 0.838134 |
| Si | Si268 | 0.701910 | 0.123130 | 0.659939 |
| Si | Si269 | 0.829576 | 0.621352 | 0.176454 |
| Si | Si270 | 0.710471 | 0.359642 | 0.677310 |
| Si | Si271 | 0.832731 | 0.855066 | 0.160728 |
| Si | Si272 | 0.290548 | 0.818425 | 0.541748 |
| Si | Si273 | 0.250426 | 0.322011 | 0.036923 |
| Si | Si274 | 0.291016 | 0.660144 | 0.539759 |
| Si | Si275 | 0.250720 | 0.163584 | 0.047267 |
| Si | Si276 | 0.744756 | 0.172600 | 0.450919 |
| Si | Si277 | 0.786361 | 0.663083 | 0.963413 |
| Si | Si278 | 0.750155 | 0.330063 | 0.459888 |
| Si | Si279 | 0.786563 | 0.817711 | 0.946347 |
| Si | Si280 | 0.137428 | 0.817895 | 0.540215 |
| Si | Si281 | 0.403509 | 0.317171 | 0.026769 |
| Si | Si282 | 0.137424 | 0.663984 | 0.526949 |
| Si | Si283 | 0.403639 | 0.163010 | 0.039274 |
| Si | Si284 | 0.898898 | 0.167928 | 0.459276 |
| Si | Si285 | 0.633179 | 0.664817 | 0.972265 |
| Si | Si286 | 0.904249 | 0.321462 | 0.468913 |
| Si | Si287 | 0.633137 | 0.819653 | 0.951473 |
| Si | Si288 | 0.089855 | 0.866724 | 0.330871 |
| Si | Si289 | 0.449636 | 0.360773 | 0.815778 |
| Si | Si290 | 0.090878 | 0.622125 | 0.314039 |
| Si | Si291 | 0.443849 | 0.120354 | 0.822699 |
| Si | Si292 | 0.946590 | 0.113995 | 0.667169 |
| Si | Si293 | 0.585003 | 0.618758 | 0.180798 |
| Si | Si294 | 0.951277 | 0.362722 | 0.682443 |
| Si | Si295 | 0.591132 | 0.863105 | 0.166609 |
| Si | Si296 | 0.211442 | 0.822021 | 0.199502 |
| Si | Si297 | 0.330289 | 0.324545 | 0.682257 |
| Si | Si298 | 0.209454 | 0.667963 | 0.189825 |
| Si | Si299 | 0.320670 | 0.171015 | 0.702700 |
| Si | Si300 | 0.824626 | 0.156482 | 0.800609 |
| Si | Si301 | 0.830753 | 0.311552 | 0.805595 |
| Si | Si302 | 0.711256 | 0.814638 | 0.293494 |
| Zn | Zn303 | 0.732056 | 0.726059 | 0.505965 |

**C<sub>4</sub>H<sub>8</sub>-Phys.Ads-Zn<sup>2+</sup> (Fig. 8/M1 in Black)** Total energy = -1920.57392658 eV

data\_

\_audit\_creation\_method 'Materials Studio'

\_cell\_length\_a 20.357621



|                                |     |           |          |          |
|--------------------------------|-----|-----------|----------|----------|
| _cell_length_b                 |     | 20.050598 |          |          |
| _cell_length_c                 |     | 13.476578 |          |          |
| _cell_angle_alpha              |     | 90.000000 |          |          |
| _cell_angle_beta               |     | 90.000000 |          |          |
| _cell_angle_gamma              |     | 90.000000 |          |          |
| _symmetry_space_group_name_H-M |     | 'P1'      |          |          |
| loop_                          |     |           |          |          |
| _atom_site_type_symbol         |     |           |          |          |
| _atom_site_label               |     |           |          |          |
| _atom_site_fract_x             |     |           |          |          |
| _atom_site_fract_y             |     |           |          |          |
| _atom_site_fract_z             |     |           |          |          |
| H                              | H1  | 0.509773  | 0.810156 | 0.436646 |
| H                              | H2  | 0.522350  | 0.724250 | 0.388723 |
| H                              | H3  | 0.499870  | 0.677141 | 0.550472 |
| H                              | H4  | 0.469281  | 0.819074 | 0.621130 |
| H                              | H5  | 0.545547  | 0.784813 | 0.651703 |
| H                              | H6  | 0.413228  | 0.723256 | 0.714329 |
| H                              | H7  | 0.469591  | 0.766314 | 0.791110 |
| H                              | H8  | 0.491616  | 0.688512 | 0.739195 |
| C                              | C9  | 0.505191  | 0.756622 | 0.448256 |
| C                              | C10 | 0.498243  | 0.731291 | 0.541658 |
| C                              | C11 | 0.494078  | 0.771438 | 0.635005 |
| C                              | C12 | 0.465124  | 0.735058 | 0.724940 |
| O                              | O13 | 0.515188  | 0.028532 | 0.209180 |
| O                              | O14 | 0.022580  | 0.537413 | 0.713994 |
| O                              | O15 | 0.524168  | 0.438742 | 0.206999 |
| O                              | O16 | 0.015702  | 0.939359 | 0.699786 |
| O                              | O17 | 0.524252  | 0.950439 | 0.786978 |
| O                              | O18 | 0.015168  | 0.455582 | 0.286202 |
| O                              | O19 | 0.514898  | 0.545658 | 0.799848 |
| O                              | O20 | 0.024274  | 0.041528 | 0.288959 |
| O                              | O21 | 0.396627  | 0.058755 | 0.274318 |
| O                              | O22 | 0.142458  | 0.559660 | 0.777057 |
| O                              | O23 | 0.399447  | 0.430174 | 0.259832 |
| O                              | O24 | 0.138913  | 0.942299 | 0.756292 |
| O                              | O25 | 0.641863  | 0.927599 | 0.715484 |
| O                              | O26 | 0.896735  | 0.427869 | 0.219345 |
| O                              | O27 | 0.636468  | 0.537634 | 0.739386 |
| O                              | O28 | 0.899386  | 0.045352 | 0.239296 |
| O                              | O29 | 0.442329  | 0.115998 | 0.111151 |
| O                              | O30 | 0.101110  | 0.619758 | 0.614268 |
| O                              | O31 | 0.443990  | 0.363633 | 0.103219 |
| O                              | O32 | 0.101507  | 0.864496 | 0.606032 |

|   |     |          |          |          |
|---|-----|----------|----------|----------|
| 0 | 033 | 0.602563 | 0.864544 | 0.876076 |
| 0 | 034 | 0.939570 | 0.370681 | 0.383654 |
| 0 | 035 | 0.603269 | 0.618864 | 0.887770 |
| 0 | 036 | 0.944924 | 0.121113 | 0.386764 |
| 0 | 037 | 0.409002 | 0.988193 | 0.109488 |
| 0 | 038 | 0.125124 | 0.489638 | 0.613594 |
| 0 | 039 | 0.435475 | 0.495271 | 0.093915 |
| 0 | 040 | 0.103173 | 0.995471 | 0.582284 |
| 0 | 041 | 0.630945 | 0.994728 | 0.883252 |
| 0 | 042 | 0.907946 | 0.500107 | 0.380536 |
| 0 | 043 | 0.602354 | 0.487387 | 0.915945 |
| 0 | 044 | 0.936488 | 0.989693 | 0.410386 |
| 0 | 045 | 0.336134 | 0.059868 | 0.445669 |
| 0 | 046 | 0.205473 | 0.547747 | 0.944222 |
| 0 | 047 | 0.338918 | 0.432664 | 0.432741 |
| 0 | 048 | 0.202131 | 0.946664 | 0.926176 |
| 0 | 049 | 0.704924 | 0.925058 | 0.548028 |
| 0 | 050 | 0.833883 | 0.426337 | 0.051038 |
| 0 | 051 | 0.700445 | 0.542553 | 0.571529 |
| 0 | 052 | 0.838436 | 0.037918 | 0.067458 |
| 0 | 053 | 0.350297 | 0.944822 | 0.349467 |
| 0 | 054 | 0.191808 | 0.442111 | 0.825507 |
| 0 | 055 | 0.342138 | 0.541737 | 0.321559 |
| 0 | 056 | 0.213519 | 0.047146 | 0.798972 |
| 0 | 057 | 0.694250 | 0.039743 | 0.646130 |
| 0 | 058 | 0.848714 | 0.541401 | 0.146373 |
| 0 | 059 | 0.715736 | 0.437547 | 0.689356 |
| 0 | 060 | 0.832406 | 0.936070 | 0.192146 |
| 0 | 061 | 0.267683 | 0.037924 | 0.283014 |
| 0 | 062 | 0.271710 | 0.540588 | 0.776958 |
| 0 | 063 | 0.269621 | 0.437058 | 0.269203 |
| 0 | 064 | 0.268410 | 0.931438 | 0.758292 |
| 0 | 065 | 0.772203 | 0.944089 | 0.712963 |
| 0 | 066 | 0.767263 | 0.450249 | 0.215875 |
| 0 | 067 | 0.765199 | 0.554333 | 0.742045 |
| 0 | 068 | 0.769516 | 0.048456 | 0.232666 |
| 0 | 069 | 0.305294 | 0.129248 | 0.604341 |
| 0 | 070 | 0.223289 | 0.620884 | 0.101626 |
| 0 | 071 | 0.310446 | 0.366819 | 0.594250 |
| 0 | 072 | 0.214803 | 0.864731 | 0.075327 |
| 0 | 073 | 0.731330 | 0.858620 | 0.385817 |
| 0 | 074 | 0.809686 | 0.356614 | 0.889923 |
| 0 | 075 | 0.719209 | 0.619145 | 0.417492 |
| 0 | 076 | 0.823429 | 0.116207 | 0.914674 |

|   |      |          |          |          |
|---|------|----------|----------|----------|
| 0 | 077  | 0.222992 | 0.036078 | 0.538321 |
| 0 | 078  | 0.315880 | 0.534727 | 0.047247 |
| 0 | 079  | 0.216438 | 0.433670 | 0.501476 |
| 0 | 080  | 0.320900 | 0.924944 | 0.997972 |
| 0 | 081  | 0.816526 | 0.949318 | 0.451798 |
| 0 | 082  | 0.722087 | 0.445598 | 0.954485 |
| 0 | 083  | 0.820741 | 0.555249 | 0.501837 |
| 0 | 084  | 0.718765 | 0.056455 | 0.995858 |
| 0 | 085  | 0.335259 | 0.001755 | 0.623222 |
| 0 | 086  | 0.203817 | 0.488877 | 0.117762 |
| 0 | 087  | 0.309457 | 0.498879 | 0.597490 |
| 0 | 088  | 0.236472 | 0.994708 | 0.102174 |
| 0 | 089  | 0.703012 | 0.988382 | 0.376679 |
| 0 | 090  | 0.833984 | 0.486361 | 0.876222 |
| 0 | 091  | 0.733053 | 0.488507 | 0.398074 |
| 0 | 092  | 0.804055 | 0.986191 | 0.893544 |
| 0 | 093  | 0.131625 | 0.124499 | 0.589005 |
| 0 | 094  | 0.406110 | 0.623772 | 0.100926 |
| 0 | 095  | 0.124254 | 0.358926 | 0.587154 |
| 0 | 096  | 0.413435 | 0.857015 | 0.091756 |
| 0 | 097  | 0.906729 | 0.859985 | 0.401981 |
| 0 | 098  | 0.630355 | 0.357429 | 0.906844 |
| 0 | 099  | 0.915649 | 0.629028 | 0.424782 |
| 0 | 0100 | 0.621860 | 0.125386 | 0.913495 |
| 0 | 0101 | 0.122512 | 0.062569 | 0.416596 |
| 0 | 0102 | 0.416105 | 0.562661 | 0.927320 |
| 0 | 0103 | 0.093097 | 0.438622 | 0.439235 |
| 0 | 0104 | 0.444554 | 0.932065 | 0.938628 |
| 0 | 0105 | 0.915418 | 0.921269 | 0.574810 |
| 0 | 0106 | 0.623542 | 0.418925 | 0.079910 |
| 0 | 0107 | 0.943762 | 0.538784 | 0.560522 |
| 0 | 0108 | 0.596278 | 0.042426 | 0.059137 |
| 0 | 0109 | 0.144236 | 0.038945 | 0.224351 |
| 0 | 0110 | 0.396915 | 0.534408 | 0.734235 |
| 0 | 0111 | 0.139903 | 0.422357 | 0.256468 |
| 0 | 0112 | 0.399232 | 0.926919 | 0.753044 |
| 0 | 0113 | 0.896447 | 0.947578 | 0.766910 |
| 0 | 0114 | 0.643814 | 0.443435 | 0.272183 |
| 0 | 0115 | 0.895845 | 0.559242 | 0.742251 |
| 0 | 0116 | 0.639715 | 0.061224 | 0.244255 |
| 0 | 0117 | 0.103633 | 0.942067 | 0.343856 |
| 0 | 0118 | 0.441842 | 0.442378 | 0.858934 |
| 0 | 0119 | 0.110692 | 0.543138 | 0.321004 |
| 0 | 0120 | 0.434705 | 0.042400 | 0.831874 |

|   |      |          |          |          |
|---|------|----------|----------|----------|
| 0 | 0121 | 0.939306 | 0.041401 | 0.644609 |
| 0 | 0122 | 0.602842 | 0.539174 | 0.151556 |
| 0 | 0123 | 0.934902 | 0.439338 | 0.688310 |
| 0 | 0124 | 0.611838 | 0.940343 | 0.181382 |
| 0 | 0125 | 0.227763 | 0.122556 | 0.143564 |
| 0 | 0126 | 0.324473 | 0.624311 | 0.645903 |
| 0 | 0127 | 0.217267 | 0.356367 | 0.137329 |
| 0 | 0128 | 0.331338 | 0.869159 | 0.614938 |
| 0 | 0129 | 0.816865 | 0.859687 | 0.848547 |
| 0 | 0130 | 0.730413 | 0.361657 | 0.351410 |
| 0 | 0131 | 0.829288 | 0.619339 | 0.882125 |
| 0 | 0132 | 0.714966 | 0.121218 | 0.374225 |
| 0 | 0133 | 0.518194 | 0.850370 | 0.211748 |
| 0 | 0134 | 0.026277 | 0.347101 | 0.718523 |
| 0 | 0135 | 0.515864 | 0.629608 | 0.211279 |
| 0 | 0136 | 0.026277 | 0.130867 | 0.707229 |
| 0 | 0137 | 0.524729 | 0.133138 | 0.781129 |
| 0 | 0138 | 0.014691 | 0.631251 | 0.296033 |
| 0 | 0139 | 0.525451 | 0.351787 | 0.789134 |
| 0 | 0140 | 0.014287 | 0.852952 | 0.289982 |
| 0 | 0141 | 0.402175 | 0.816930 | 0.280342 |
| 0 | 0142 | 0.148820 | 0.323424 | 0.773679 |
| 0 | 0143 | 0.402113 | 0.669122 | 0.287616 |
| 0 | 0144 | 0.143250 | 0.156732 | 0.780882 |
| 0 | 0145 | 0.647047 | 0.151309 | 0.724215 |
| 0 | 0146 | 0.894157 | 0.651317 | 0.233829 |
| 0 | 0147 | 0.643015 | 0.329411 | 0.714009 |
| 0 | 0148 | 0.898501 | 0.823809 | 0.212215 |
| 0 | 0149 | 0.460039 | 0.740106 | 0.146018 |
| 0 | 0150 | 0.089541 | 0.240421 | 0.651117 |
| 0 | 0151 | 0.590248 | 0.241757 | 0.838644 |
| 0 | 0152 | 0.951578 | 0.742981 | 0.345906 |
| 0 | 0153 | 0.332416 | 0.813144 | 0.438272 |
| 0 | 0154 | 0.207273 | 0.338354 | 0.945333 |
| 0 | 0155 | 0.339274 | 0.662264 | 0.455983 |
| 0 | 0156 | 0.206455 | 0.134653 | 0.949854 |
| 0 | 0157 | 0.717061 | 0.156924 | 0.563559 |
| 0 | 0158 | 0.828819 | 0.660809 | 0.069514 |
| 0 | 0159 | 0.706532 | 0.345698 | 0.544473 |
| 0 | 0160 | 0.836310 | 0.846638 | 0.042704 |
| 0 | 0161 | 0.263218 | 0.849681 | 0.257141 |
| 0 | 0162 | 0.278069 | 0.347049 | 0.782857 |
| 0 | 0163 | 0.259476 | 0.656952 | 0.283947 |
| 0 | 0164 | 0.274656 | 0.162750 | 0.790412 |

|    |       |          |          |          |
|----|-------|----------|----------|----------|
| O  | O165  | 0.775465 | 0.124581 | 0.732784 |
| O  | O166  | 0.765878 | 0.624465 | 0.233594 |
| O  | O167  | 0.774478 | 0.321646 | 0.706311 |
| O  | O168  | 0.766986 | 0.822932 | 0.202470 |
| O  | O169  | 0.293934 | 0.744453 | 0.593931 |
| O  | O170  | 0.243613 | 0.238586 | 0.060810 |
| O  | O171  | 0.744651 | 0.244413 | 0.426279 |
| O  | O172  | 0.798964 | 0.743561 | 0.926774 |
| O  | O173  | 0.217589 | 0.842689 | 0.523709 |
| O  | O174  | 0.325505 | 0.339751 | 0.029200 |
| O  | O175  | 0.218945 | 0.641730 | 0.532048 |
| O  | O176  | 0.327959 | 0.140129 | 0.020238 |
| O  | O177  | 0.828615 | 0.145737 | 0.463638 |
| O  | O178  | 0.716731 | 0.644884 | 0.973848 |
| O  | O179  | 0.828409 | 0.341257 | 0.478593 |
| O  | O180  | 0.715574 | 0.841842 | 0.970610 |
| O  | O181  | 0.136659 | 0.741736 | 0.567007 |
| O  | O182  | 0.408094 | 0.239682 | 0.070417 |
| O  | O183  | 0.912869 | 0.245818 | 0.427831 |
| O  | O184  | 0.632263 | 0.742733 | 0.929451 |
| O  | O185  | 0.108910 | 0.821689 | 0.418009 |
| O  | O186  | 0.431607 | 0.318371 | 0.918305 |
| O  | O187  | 0.109296 | 0.654418 | 0.425978 |
| O  | O188  | 0.440355 | 0.157865 | 0.925003 |
| O  | O189  | 0.934984 | 0.163438 | 0.574761 |
| O  | O190  | 0.606580 | 0.660229 | 0.076631 |
| O  | O191  | 0.942723 | 0.332734 | 0.570658 |
| O  | O192  | 0.602392 | 0.833124 | 0.065898 |
| O  | O193  | 0.134974 | 0.839301 | 0.225587 |
| O  | O194  | 0.402785 | 0.349288 | 0.730758 |
| O  | O195  | 0.133423 | 0.658994 | 0.232227 |
| O  | O196  | 0.400095 | 0.151742 | 0.736694 |
| O  | O197  | 0.902894 | 0.141246 | 0.763060 |
| O  | O198  | 0.638708 | 0.641720 | 0.266340 |
| O  | O199  | 0.900929 | 0.321611 | 0.756944 |
| O  | O200  | 0.640997 | 0.821538 | 0.253884 |
| O  | O201  | 0.214924 | 0.746283 | 0.153408 |
| O  | O202  | 0.327005 | 0.249928 | 0.668627 |
| O  | O203  | 0.819168 | 0.232367 | 0.830818 |
| O  | O204  | 0.723111 | 0.733705 | 0.329268 |
| Al | Al205 | 0.332751 | 0.862576 | 0.326081 |
| Al | Al206 | 0.330609 | 0.625603 | 0.334370 |
| Si | Si207 | 0.712037 | 0.654861 | 0.310242 |
| Si | Si208 | 0.440739 | 0.047843 | 0.176076 |

|    |       |          |          |          |
|----|-------|----------|----------|----------|
| Si | Si209 | 0.097437 | 0.551582 | 0.678735 |
| Si | Si210 | 0.449351 | 0.432090 | 0.166808 |
| Si | Si211 | 0.090851 | 0.935521 | 0.661107 |
| Si | Si212 | 0.599741 | 0.934938 | 0.816915 |
| Si | Si213 | 0.940520 | 0.438543 | 0.318593 |
| Si | Si214 | 0.590462 | 0.546956 | 0.836356 |
| Si | Si215 | 0.950490 | 0.049405 | 0.331359 |
| Si | Si216 | 0.337787 | 0.023289 | 0.337667 |
| Si | Si217 | 0.203027 | 0.522079 | 0.831393 |
| Si | Si218 | 0.337539 | 0.462200 | 0.320029 |
| Si | Si219 | 0.205570 | 0.966920 | 0.810494 |
| Si | Si220 | 0.703707 | 0.959718 | 0.656493 |
| Si | Si221 | 0.836600 | 0.461684 | 0.158882 |
| Si | Si222 | 0.704828 | 0.517698 | 0.685722 |
| Si | Si223 | 0.835015 | 0.016896 | 0.183209 |
| Si | Si224 | 0.299877 | 0.056738 | 0.552011 |
| Si | Si225 | 0.237071 | 0.548678 | 0.054153 |
| Si | Si226 | 0.293947 | 0.433049 | 0.531289 |
| Si | Si227 | 0.243249 | 0.932279 | 0.026940 |
| Si | Si228 | 0.739346 | 0.930286 | 0.439911 |
| Si | Si229 | 0.799842 | 0.428459 | 0.942606 |
| Si | Si230 | 0.743589 | 0.551273 | 0.471437 |
| Si | Si231 | 0.796159 | 0.049277 | 0.967364 |
| Si | Si232 | 0.145499 | 0.054883 | 0.531235 |
| Si | Si233 | 0.392892 | 0.553937 | 0.042327 |
| Si | Si234 | 0.140059 | 0.430156 | 0.535412 |
| Si | Si235 | 0.396556 | 0.926238 | 0.034722 |
| Si | Si236 | 0.893945 | 0.929835 | 0.459516 |
| Si | Si237 | 0.644778 | 0.426929 | 0.964513 |
| Si | Si238 | 0.897076 | 0.555599 | 0.466836 |
| Si | Si239 | 0.642198 | 0.054691 | 0.962898 |
| Si | Si240 | 0.098750 | 0.021159 | 0.318874 |
| Si | Si241 | 0.441939 | 0.521137 | 0.830985 |
| Si | Si242 | 0.090043 | 0.464970 | 0.325101 |
| Si | Si243 | 0.450325 | 0.963272 | 0.827568 |
| Si | Si244 | 0.942041 | 0.962370 | 0.671000 |
| Si | Si245 | 0.598125 | 0.459864 | 0.177086 |
| Si | Si246 | 0.949283 | 0.518563 | 0.676969 |
| Si | Si247 | 0.590525 | 0.018550 | 0.174043 |
| Si | Si248 | 0.219671 | 0.047944 | 0.188756 |
| Si | Si249 | 0.324817 | 0.548649 | 0.688793 |
| Si | Si250 | 0.208380 | 0.426745 | 0.195056 |
| Si | Si251 | 0.332680 | 0.933535 | 0.687571 |
| Si | Si252 | 0.822376 | 0.934885 | 0.805252 |

|    |       |          |          |          |
|----|-------|----------|----------|----------|
| Si | Si253 | 0.719022 | 0.436262 | 0.309099 |
| Si | Si254 | 0.830756 | 0.554355 | 0.810899 |
| Si | Si255 | 0.707387 | 0.054687 | 0.307284 |
| Si | Si256 | 0.448147 | 0.816702 | 0.181504 |
| Si | Si257 | 0.097108 | 0.317900 | 0.682660 |
| Si | Si258 | 0.445765 | 0.664889 | 0.185487 |
| Si | Si259 | 0.097752 | 0.162893 | 0.682104 |
| Si | Si260 | 0.595729 | 0.163022 | 0.814178 |
| Si | Si261 | 0.944554 | 0.663920 | 0.324773 |
| Si | Si262 | 0.597217 | 0.320057 | 0.811966 |
| Si | Si263 | 0.943270 | 0.820028 | 0.312369 |
| Si | Si264 | 0.206663 | 0.362920 | 0.831400 |
| Si | Si265 | 0.208936 | 0.125166 | 0.830354 |
| Si | Si266 | 0.708715 | 0.117971 | 0.667472 |
| Si | Si267 | 0.834498 | 0.619073 | 0.171774 |
| Si | Si268 | 0.709376 | 0.358653 | 0.663431 |
| Si | Si269 | 0.834242 | 0.857701 | 0.162081 |
| Si | Si270 | 0.292523 | 0.818061 | 0.543591 |
| Si | Si271 | 0.248728 | 0.318017 | 0.043385 |
| Si | Si272 | 0.293381 | 0.667345 | 0.555782 |
| Si | Si273 | 0.251414 | 0.159390 | 0.043101 |
| Si | Si274 | 0.751503 | 0.166738 | 0.456386 |
| Si | Si275 | 0.793510 | 0.666822 | 0.962363 |
| Si | Si276 | 0.752474 | 0.322859 | 0.451239 |
| Si | Si277 | 0.792189 | 0.822571 | 0.948365 |
| Si | Si278 | 0.140731 | 0.818094 | 0.528000 |
| Si | Si279 | 0.402032 | 0.315809 | 0.030546 |
| Si | Si280 | 0.141435 | 0.664033 | 0.534321 |
| Si | Si281 | 0.404378 | 0.163039 | 0.032125 |
| Si | Si282 | 0.905466 | 0.168733 | 0.463081 |
| Si | Si283 | 0.639790 | 0.666285 | 0.967357 |
| Si | Si284 | 0.905885 | 0.322535 | 0.465243 |
| Si | Si285 | 0.638699 | 0.820598 | 0.960788 |
| Si | Si286 | 0.091159 | 0.863938 | 0.318264 |
| Si | Si287 | 0.450348 | 0.365227 | 0.824225 |
| Si | Si288 | 0.092461 | 0.622056 | 0.318634 |
| Si | Si289 | 0.449771 | 0.121423 | 0.818705 |
| Si | Si290 | 0.950871 | 0.119165 | 0.672765 |
| Si | Si291 | 0.591331 | 0.617281 | 0.176278 |
| Si | Si292 | 0.951161 | 0.360230 | 0.683200 |
| Si | Si293 | 0.593688 | 0.861702 | 0.177465 |
| Si | Si294 | 0.208305 | 0.824855 | 0.180472 |
| Si | Si295 | 0.329469 | 0.328237 | 0.694925 |
| Si | Si296 | 0.209084 | 0.670598 | 0.194813 |

|    |       |          |          |          |
|----|-------|----------|----------|----------|
| Si | Si297 | 0.326954 | 0.172507 | 0.700172 |
| Si | Si298 | 0.830375 | 0.153943 | 0.809053 |
| Si | Si299 | 0.826556 | 0.309120 | 0.796068 |
| Si | Si300 | 0.715756 | 0.810150 | 0.292862 |
| Zn | Zn301 | 0.401271 | 0.742445 | 0.398372 |

**TS-C<sub>4</sub>H<sub>8</sub>-dehydro-Zn<sup>2+</sup> (Fig. 8/TS1 in Black)** Total energy = -1918.38880744 eV

data\_

\_audit\_creation\_method 'Materials Studio'

\_cell\_length\_a 20.357621

\_cell\_length\_b 20.050598

\_cell\_length\_c 13.476578

\_cell\_angle\_alpha 90.000000

\_cell\_angle\_beta 90.000000

\_cell\_angle\_gamma 90.000000

\_symmetry\_space\_group\_name\_H-M 'P1'

loop\_

\_atom\_site\_type\_symbol

\_atom\_site\_label

\_atom\_site\_fract\_x

\_atom\_site\_fract\_y

\_atom\_site\_fract\_z

|   |     |          |          |          |
|---|-----|----------|----------|----------|
| H | H1  | 0.432190 | 0.716183 | 0.587595 |
| H | H2  | 0.393026 | 0.684019 | 0.483216 |
| H | H3  | 0.467482 | 0.777606 | 0.521569 |
| H | H4  | 0.588966 | 0.673868 | 0.684078 |
| H | H5  | 0.645475 | 0.744327 | 0.659771 |
| H | H6  | 0.595021 | 0.762557 | 0.498197 |
| H | H7  | 0.514189 | 0.636475 | 0.547741 |
| H | H8  | 0.529320 | 0.668983 | 0.428889 |
| C | C9  | 0.455109 | 0.723924 | 0.514675 |
| C | C10 | 0.605362 | 0.713024 | 0.634236 |
| C | C11 | 0.577284 | 0.722287 | 0.545778 |
| C | C12 | 0.519745 | 0.683119 | 0.506149 |
| O | O13 | 0.511689 | 0.024491 | 0.207621 |
| O | O14 | 0.026558 | 0.532527 | 0.718057 |
| O | O15 | 0.525972 | 0.438359 | 0.210428 |
| O | O16 | 0.013921 | 0.940042 | 0.699154 |
| O | O17 | 0.521624 | 0.949849 | 0.786950 |
| O | O18 | 0.017847 | 0.452306 | 0.292551 |
| O | O19 | 0.517421 | 0.541474 | 0.798939 |
| O | O20 | 0.020619 | 0.040179 | 0.285910 |
| O | O21 | 0.393014 | 0.060682 | 0.268958 |



|   |     |          |          |          |
|---|-----|----------|----------|----------|
| 0 | 022 | 0.145729 | 0.561338 | 0.781109 |
| 0 | 023 | 0.403230 | 0.436561 | 0.270573 |
| 0 | 024 | 0.137167 | 0.948561 | 0.752383 |
| 0 | 025 | 0.639704 | 0.924726 | 0.717267 |
| 0 | 026 | 0.899044 | 0.429123 | 0.224306 |
| 0 | 027 | 0.641284 | 0.541088 | 0.748314 |
| 0 | 028 | 0.895017 | 0.045882 | 0.239049 |
| 0 | 029 | 0.442811 | 0.111154 | 0.102594 |
| 0 | 030 | 0.101168 | 0.618634 | 0.617871 |
| 0 | 031 | 0.441181 | 0.358346 | 0.123645 |
| 0 | 032 | 0.100519 | 0.863769 | 0.609998 |
| 0 | 033 | 0.598714 | 0.862019 | 0.877159 |
| 0 | 034 | 0.939592 | 0.369895 | 0.388855 |
| 0 | 035 | 0.599531 | 0.615330 | 0.899878 |
| 0 | 036 | 0.942692 | 0.120032 | 0.386410 |
| 0 | 037 | 0.404087 | 0.984831 | 0.110140 |
| 0 | 038 | 0.131615 | 0.489813 | 0.618647 |
| 0 | 039 | 0.435321 | 0.489268 | 0.093745 |
| 0 | 040 | 0.099613 | 0.993924 | 0.575371 |
| 0 | 041 | 0.628041 | 0.991462 | 0.885138 |
| 0 | 042 | 0.911738 | 0.499800 | 0.387098 |
| 0 | 043 | 0.602914 | 0.483429 | 0.918021 |
| 0 | 044 | 0.933593 | 0.988522 | 0.408403 |
| 0 | 045 | 0.332276 | 0.062161 | 0.441095 |
| 0 | 046 | 0.202608 | 0.548839 | 0.954471 |
| 0 | 047 | 0.342154 | 0.443141 | 0.440999 |
| 0 | 048 | 0.200278 | 0.944856 | 0.920846 |
| 0 | 049 | 0.701924 | 0.925020 | 0.548756 |
| 0 | 050 | 0.834334 | 0.424125 | 0.057543 |
| 0 | 051 | 0.703268 | 0.543031 | 0.577756 |
| 0 | 052 | 0.835103 | 0.035604 | 0.066201 |
| 0 | 053 | 0.349533 | 0.946528 | 0.347318 |
| 0 | 054 | 0.189958 | 0.442747 | 0.834608 |
| 0 | 055 | 0.335016 | 0.544827 | 0.315913 |
| 0 | 056 | 0.218710 | 0.047362 | 0.800055 |
| 0 | 057 | 0.692171 | 0.037745 | 0.653042 |
| 0 | 058 | 0.848119 | 0.540759 | 0.148672 |
| 0 | 059 | 0.714587 | 0.437439 | 0.694947 |
| 0 | 060 | 0.831281 | 0.934758 | 0.193064 |
| 0 | 061 | 0.264314 | 0.035820 | 0.279213 |
| 0 | 062 | 0.274558 | 0.538464 | 0.792725 |
| 0 | 063 | 0.272970 | 0.431207 | 0.276871 |
| 0 | 064 | 0.265952 | 0.929962 | 0.751361 |
| 0 | 065 | 0.770217 | 0.939812 | 0.712752 |

|   |      |          |          |          |
|---|------|----------|----------|----------|
| 0 | 066  | 0.769322 | 0.449066 | 0.223250 |
| 0 | 067  | 0.770515 | 0.551730 | 0.745522 |
| 0 | 068  | 0.764931 | 0.045889 | 0.229694 |
| 0 | 069  | 0.300894 | 0.130156 | 0.601209 |
| 0 | 070  | 0.230747 | 0.619912 | 0.113739 |
| 0 | 071  | 0.325308 | 0.374532 | 0.601850 |
| 0 | 072  | 0.205540 | 0.864273 | 0.071211 |
| 0 | 073  | 0.728881 | 0.858442 | 0.386776 |
| 0 | 074  | 0.810619 | 0.354756 | 0.895878 |
| 0 | 075  | 0.721907 | 0.619316 | 0.423125 |
| 0 | 076  | 0.821752 | 0.113980 | 0.913261 |
| 0 | 077  | 0.219664 | 0.036184 | 0.534211 |
| 0 | 078  | 0.317637 | 0.533115 | 0.043172 |
| 0 | 079  | 0.221278 | 0.428463 | 0.510756 |
| 0 | 080  | 0.316274 | 0.920046 | 0.999357 |
| 0 | 081  | 0.814217 | 0.948252 | 0.453084 |
| 0 | 082  | 0.723515 | 0.444549 | 0.958177 |
| 0 | 083  | 0.823515 | 0.555552 | 0.506327 |
| 0 | 084  | 0.715870 | 0.056410 | 0.993088 |
| 0 | 085  | 0.332283 | 0.002803 | 0.618114 |
| 0 | 086  | 0.208987 | 0.488753 | 0.126996 |
| 0 | 087  | 0.305663 | 0.504937 | 0.606277 |
| 0 | 088  | 0.232009 | 0.993755 | 0.097542 |
| 0 | 089  | 0.701075 | 0.988834 | 0.378568 |
| 0 | 090  | 0.836773 | 0.484253 | 0.882892 |
| 0 | 091  | 0.735142 | 0.488247 | 0.404860 |
| 0 | 092  | 0.800587 | 0.984130 | 0.892400 |
| 0 | 093  | 0.127985 | 0.123333 | 0.586380 |
| 0 | 094  | 0.407438 | 0.618953 | 0.106152 |
| 0 | 095  | 0.124347 | 0.358825 | 0.590952 |
| 0 | 096  | 0.413879 | 0.854944 | 0.083791 |
| 0 | 097  | 0.904545 | 0.858697 | 0.402204 |
| 0 | 098  | 0.632405 | 0.354227 | 0.913961 |
| 0 | 099  | 0.918997 | 0.628834 | 0.428141 |
| 0 | 0100 | 0.616369 | 0.122262 | 0.911664 |
| 0 | 0101 | 0.119164 | 0.063122 | 0.412377 |
| 0 | 0102 | 0.421492 | 0.561127 | 0.930806 |
| 0 | 0103 | 0.098634 | 0.440444 | 0.443897 |
| 0 | 0104 | 0.438205 | 0.935409 | 0.934235 |
| 0 | 0105 | 0.914069 | 0.920834 | 0.574162 |
| 0 | 0106 | 0.625947 | 0.418823 | 0.085101 |
| 0 | 0107 | 0.946243 | 0.540848 | 0.566951 |
| 0 | 0108 | 0.594408 | 0.041143 | 0.060245 |
| 0 | 0109 | 0.140671 | 0.038384 | 0.220538 |

|   |      |          |          |          |
|---|------|----------|----------|----------|
| 0 | 0110 | 0.397744 | 0.541746 | 0.736751 |
| 0 | 0111 | 0.142865 | 0.420727 | 0.260876 |
| 0 | 0112 | 0.396712 | 0.927781 | 0.746790 |
| 0 | 0113 | 0.894415 | 0.948307 | 0.766013 |
| 0 | 0114 | 0.645172 | 0.447833 | 0.276524 |
| 0 | 0115 | 0.900949 | 0.557106 | 0.751431 |
| 0 | 0116 | 0.635405 | 0.059950 | 0.246560 |
| 0 | 0117 | 0.101593 | 0.941873 | 0.341363 |
| 0 | 0118 | 0.437270 | 0.441952 | 0.851767 |
| 0 | 0119 | 0.111487 | 0.542426 | 0.320037 |
| 0 | 0120 | 0.432065 | 0.043893 | 0.823091 |
| 0 | 0121 | 0.937478 | 0.041371 | 0.642951 |
| 0 | 0122 | 0.601642 | 0.539951 | 0.151772 |
| 0 | 0123 | 0.935650 | 0.437809 | 0.687878 |
| 0 | 0124 | 0.610991 | 0.938865 | 0.181960 |
| 0 | 0125 | 0.225520 | 0.121353 | 0.141412 |
| 0 | 0126 | 0.315332 | 0.628974 | 0.661612 |
| 0 | 0127 | 0.220096 | 0.355957 | 0.139052 |
| 0 | 0128 | 0.329162 | 0.870421 | 0.605863 |
| 0 | 0129 | 0.818724 | 0.857757 | 0.848838 |
| 0 | 0130 | 0.727250 | 0.361684 | 0.356672 |
| 0 | 0131 | 0.831614 | 0.617280 | 0.888162 |
| 0 | 0132 | 0.713624 | 0.121828 | 0.370454 |
| 0 | 0133 | 0.517299 | 0.848719 | 0.207393 |
| 0 | 0134 | 0.026108 | 0.345295 | 0.720471 |
| 0 | 0135 | 0.516550 | 0.631143 | 0.214889 |
| 0 | 0136 | 0.024148 | 0.131296 | 0.706480 |
| 0 | 0137 | 0.521803 | 0.135453 | 0.775767 |
| 0 | 0138 | 0.014902 | 0.630667 | 0.293415 |
| 0 | 0139 | 0.527880 | 0.354000 | 0.794718 |
| 0 | 0140 | 0.011377 | 0.853609 | 0.287840 |
| 0 | 0141 | 0.401303 | 0.820235 | 0.274874 |
| 0 | 0142 | 0.148523 | 0.323887 | 0.777608 |
| 0 | 0143 | 0.401630 | 0.670374 | 0.289916 |
| 0 | 0144 | 0.141639 | 0.152285 | 0.779488 |
| 0 | 0145 | 0.645602 | 0.151588 | 0.724636 |
| 0 | 0146 | 0.892992 | 0.650032 | 0.237881 |
| 0 | 0147 | 0.644767 | 0.327804 | 0.720396 |
| 0 | 0148 | 0.895466 | 0.821378 | 0.213127 |
| 0 | 0149 | 0.457153 | 0.738438 | 0.144517 |
| 0 | 0150 | 0.091035 | 0.239778 | 0.653286 |
| 0 | 0151 | 0.588658 | 0.240758 | 0.841668 |
| 0 | 0152 | 0.952185 | 0.742442 | 0.346019 |
| 0 | 0153 | 0.326513 | 0.813993 | 0.428670 |

|   |      |          |          |          |
|---|------|----------|----------|----------|
| 0 | 0154 | 0.210005 | 0.336815 | 0.946858 |
| 0 | 0155 | 0.342062 | 0.652607 | 0.469630 |
| 0 | 0156 | 0.205702 | 0.136466 | 0.948288 |
| 0 | 0157 | 0.713686 | 0.152057 | 0.561526 |
| 0 | 0158 | 0.826820 | 0.660804 | 0.073978 |
| 0 | 0159 | 0.706230 | 0.345309 | 0.549928 |
| 0 | 0160 | 0.833883 | 0.845496 | 0.043555 |
| 0 | 0161 | 0.262437 | 0.854809 | 0.246168 |
| 0 | 0162 | 0.277005 | 0.350804 | 0.780488 |
| 0 | 0163 | 0.259807 | 0.665933 | 0.295236 |
| 0 | 0164 | 0.272643 | 0.165711 | 0.787916 |
| 0 | 0165 | 0.774016 | 0.125663 | 0.731254 |
| 0 | 0166 | 0.764965 | 0.622832 | 0.237568 |
| 0 | 0167 | 0.776164 | 0.322983 | 0.710202 |
| 0 | 0168 | 0.764094 | 0.822552 | 0.203163 |
| 0 | 0169 | 0.291911 | 0.745684 | 0.587677 |
| 0 | 0170 | 0.245013 | 0.237853 | 0.063577 |
| 0 | 0171 | 0.742028 | 0.243891 | 0.430507 |
| 0 | 0172 | 0.798733 | 0.741747 | 0.927982 |
| 0 | 0173 | 0.213840 | 0.842306 | 0.519792 |
| 0 | 0174 | 0.328111 | 0.337745 | 0.030002 |
| 0 | 0175 | 0.216949 | 0.641632 | 0.530426 |
| 0 | 0176 | 0.326954 | 0.138318 | 0.019750 |
| 0 | 0177 | 0.826326 | 0.144906 | 0.463288 |
| 0 | 0178 | 0.716661 | 0.642506 | 0.972946 |
| 0 | 0179 | 0.827103 | 0.340372 | 0.480134 |
| 0 | 0180 | 0.714665 | 0.840821 | 0.964776 |
| 0 | 0181 | 0.134030 | 0.741083 | 0.567020 |
| 0 | 0182 | 0.408776 | 0.236280 | 0.072175 |
| 0 | 0183 | 0.910770 | 0.244950 | 0.427414 |
| 0 | 0184 | 0.631941 | 0.740339 | 0.930209 |
| 0 | 0185 | 0.102483 | 0.822505 | 0.420901 |
| 0 | 0186 | 0.441390 | 0.323083 | 0.934110 |
| 0 | 0187 | 0.105998 | 0.652219 | 0.428222 |
| 0 | 0188 | 0.436629 | 0.158812 | 0.919206 |
| 0 | 0189 | 0.932743 | 0.163179 | 0.574126 |
| 0 | 0190 | 0.610592 | 0.662586 | 0.084623 |
| 0 | 0191 | 0.940509 | 0.329006 | 0.574597 |
| 0 | 0192 | 0.604411 | 0.831251 | 0.066557 |
| 0 | 0193 | 0.133377 | 0.836196 | 0.229706 |
| 0 | 0194 | 0.404159 | 0.335265 | 0.746277 |
| 0 | 0195 | 0.135289 | 0.658766 | 0.235564 |
| 0 | 0196 | 0.397167 | 0.154760 | 0.730611 |
| 0 | 0197 | 0.901301 | 0.140679 | 0.762730 |

|    |       |          |          |          |
|----|-------|----------|----------|----------|
| O  | O198  | 0.638520 | 0.638373 | 0.274417 |
| O  | O199  | 0.901770 | 0.321151 | 0.762626 |
| O  | O200  | 0.638777 | 0.819814 | 0.256174 |
| O  | O201  | 0.214767 | 0.746571 | 0.153272 |
| O  | O202  | 0.320686 | 0.252068 | 0.662462 |
| O  | O203  | 0.818551 | 0.231432 | 0.833161 |
| O  | O204  | 0.722427 | 0.732990 | 0.331399 |
| Al | Al205 | 0.329699 | 0.865470 | 0.320074 |
| Al | Al206 | 0.330427 | 0.628290 | 0.337687 |
| Si | Si207 | 0.712137 | 0.653702 | 0.315579 |
| Si | Si208 | 0.437984 | 0.045414 | 0.172558 |
| Si | Si209 | 0.100666 | 0.550507 | 0.683125 |
| Si | Si210 | 0.450345 | 0.430902 | 0.174872 |
| Si | Si211 | 0.088737 | 0.936618 | 0.659089 |
| Si | Si212 | 0.596537 | 0.932343 | 0.817611 |
| Si | Si213 | 0.942539 | 0.437833 | 0.324226 |
| Si | Si214 | 0.591577 | 0.545014 | 0.841732 |
| Si | Si215 | 0.947203 | 0.048598 | 0.329886 |
| Si | Si216 | 0.335039 | 0.024600 | 0.333812 |
| Si | Si217 | 0.203139 | 0.522451 | 0.841402 |
| Si | Si218 | 0.337959 | 0.465395 | 0.325162 |
| Si | Si219 | 0.205469 | 0.967611 | 0.806507 |
| Si | Si220 | 0.701267 | 0.957445 | 0.658697 |
| Si | Si221 | 0.837706 | 0.461001 | 0.164252 |
| Si | Si222 | 0.707600 | 0.518028 | 0.691762 |
| Si | Si223 | 0.831651 | 0.015540 | 0.182312 |
| Si | Si224 | 0.296354 | 0.057843 | 0.547814 |
| Si | Si225 | 0.239912 | 0.548493 | 0.060936 |
| Si | Si226 | 0.298294 | 0.437508 | 0.540034 |
| Si | Si227 | 0.238372 | 0.930351 | 0.023980 |
| Si | Si228 | 0.736831 | 0.930036 | 0.441108 |
| Si | Si229 | 0.801294 | 0.426722 | 0.948395 |
| Si | Si230 | 0.746049 | 0.551555 | 0.477347 |
| Si | Si231 | 0.793235 | 0.047543 | 0.965807 |
| Si | Si232 | 0.142014 | 0.054413 | 0.526923 |
| Si | Si233 | 0.395178 | 0.550471 | 0.043776 |
| Si | Si234 | 0.144156 | 0.429437 | 0.540918 |
| Si | Si235 | 0.392572 | 0.924839 | 0.031487 |
| Si | Si236 | 0.891660 | 0.928830 | 0.459163 |
| Si | Si237 | 0.646473 | 0.424844 | 0.969083 |
| Si | Si238 | 0.899960 | 0.556007 | 0.472111 |
| Si | Si239 | 0.638923 | 0.052715 | 0.962345 |
| Si | Si240 | 0.095444 | 0.020794 | 0.315434 |
| Si | Si241 | 0.443327 | 0.521339 | 0.830647 |

|    |       |          |          |          |
|----|-------|----------|----------|----------|
| Si | Si242 | 0.092914 | 0.463874 | 0.328731 |
| Si | Si243 | 0.446919 | 0.964422 | 0.822385 |
| Si | Si244 | 0.940131 | 0.962491 | 0.670116 |
| Si | Si245 | 0.599427 | 0.460979 | 0.180410 |
| Si | Si246 | 0.952247 | 0.516899 | 0.681735 |
| Si | Si247 | 0.587839 | 0.016605 | 0.174597 |
| Si | Si248 | 0.216267 | 0.046588 | 0.185151 |
| Si | Si249 | 0.322896 | 0.552205 | 0.699940 |
| Si | Si250 | 0.211921 | 0.424771 | 0.200783 |
| Si | Si251 | 0.330437 | 0.933725 | 0.680692 |
| Si | Si252 | 0.820904 | 0.932982 | 0.804811 |
| Si | Si253 | 0.719577 | 0.437040 | 0.315160 |
| Si | Si254 | 0.834541 | 0.552189 | 0.817252 |
| Si | Si255 | 0.704317 | 0.054014 | 0.306790 |
| Si | Si256 | 0.447621 | 0.816143 | 0.175116 |
| Si | Si257 | 0.097455 | 0.317121 | 0.685847 |
| Si | Si258 | 0.445518 | 0.663605 | 0.187967 |
| Si | Si259 | 0.096270 | 0.161506 | 0.681334 |
| Si | Si260 | 0.592984 | 0.162498 | 0.813178 |
| Si | Si261 | 0.945215 | 0.663209 | 0.326091 |
| Si | Si262 | 0.598349 | 0.319126 | 0.817653 |
| Si | Si263 | 0.941239 | 0.819134 | 0.312264 |
| Si | Si264 | 0.206685 | 0.363688 | 0.834310 |
| Si | Si265 | 0.209034 | 0.125266 | 0.829251 |
| Si | Si266 | 0.706580 | 0.116543 | 0.668298 |
| Si | Si267 | 0.833365 | 0.618187 | 0.175352 |
| Si | Si268 | 0.709950 | 0.358594 | 0.668660 |
| Si | Si269 | 0.831794 | 0.856386 | 0.162836 |
| Si | Si270 | 0.289586 | 0.819041 | 0.535810 |
| Si | Si271 | 0.251149 | 0.317055 | 0.045264 |
| Si | Si272 | 0.289292 | 0.666801 | 0.563530 |
| Si | Si273 | 0.250772 | 0.158879 | 0.042586 |
| Si | Si274 | 0.749074 | 0.165459 | 0.456018 |
| Si | Si275 | 0.793450 | 0.665299 | 0.965144 |
| Si | Si276 | 0.750710 | 0.322279 | 0.455283 |
| Si | Si277 | 0.791632 | 0.820992 | 0.947555 |
| Si | Si278 | 0.137287 | 0.817814 | 0.528723 |
| Si | Si279 | 0.404547 | 0.314159 | 0.040076 |
| Si | Si280 | 0.138904 | 0.663239 | 0.535506 |
| Si | Si281 | 0.403612 | 0.160955 | 0.028734 |
| Si | Si282 | 0.903181 | 0.167829 | 0.462473 |
| Si | Si283 | 0.639768 | 0.664888 | 0.972169 |
| Si | Si284 | 0.904463 | 0.321014 | 0.468003 |
| Si | Si285 | 0.637844 | 0.818648 | 0.959406 |

|    |       |          |          |          |
|----|-------|----------|----------|----------|
| Si | Si286 | 0.087941 | 0.863570 | 0.318835 |
| Si | Si287 | 0.452555 | 0.363682 | 0.831601 |
| Si | Si288 | 0.092245 | 0.621054 | 0.318928 |
| Si | Si289 | 0.446668 | 0.123155 | 0.812162 |
| Si | Si290 | 0.948908 | 0.118990 | 0.671963 |
| Si | Si291 | 0.592178 | 0.617722 | 0.181275 |
| Si | Si292 | 0.950928 | 0.358364 | 0.685770 |
| Si | Si293 | 0.593547 | 0.860085 | 0.177197 |
| Si | Si294 | 0.205106 | 0.825322 | 0.177569 |
| Si | Si295 | 0.331352 | 0.328094 | 0.698812 |
| Si | Si296 | 0.211198 | 0.672474 | 0.201278 |
| Si | Si297 | 0.323398 | 0.174621 | 0.695403 |
| Si | Si298 | 0.828871 | 0.153193 | 0.808955 |
| Si | Si299 | 0.827184 | 0.308465 | 0.800596 |
| Si | Si300 | 0.713785 | 0.809178 | 0.294622 |
| Zn | Zn301 | 0.409894 | 0.755582 | 0.386634 |

**M-C<sub>4</sub>H<sub>7</sub>Zn-OH-Zn<sup>2+</sup> (Fig. 8/M2 in Black)** Total energy = -1918.98460350 eV

data\_

\_audit\_creation\_method 'Materials Studio'

\_cell\_length\_a 20.357621

\_cell\_length\_b 20.050598

\_cell\_length\_c 13.476578

\_cell\_angle\_alpha 90.000000

\_cell\_angle\_beta 90.000000

\_cell\_angle\_gamma 90.000000

\_symmetry\_space\_group\_name\_H-M 'P1'

loop\_

\_atom\_site\_type\_symbol

\_atom\_site\_label

\_atom\_site\_fract\_x

\_atom\_site\_fract\_y

\_atom\_site\_fract\_z

|   |     |          |          |          |
|---|-----|----------|----------|----------|
| H | H1  | 0.505909 | 0.819456 | 0.521504 |
| H | H2  | 0.378891 | 0.623491 | 0.493865 |
| H | H3  | 0.548611 | 0.790470 | 0.416519 |
| H | H4  | 0.565116 | 0.730952 | 0.728928 |
| H | H5  | 0.653425 | 0.746855 | 0.707741 |
| H | H6  | 0.639167 | 0.732541 | 0.529823 |
| H | H7  | 0.495304 | 0.701471 | 0.585385 |
| H | H8  | 0.536820 | 0.671912 | 0.478369 |
| C | C9  | 0.510653 | 0.776964 | 0.470660 |
| C | C10 | 0.605580 | 0.735212 | 0.676678 |

|   |     |          |          |          |
|---|-----|----------|----------|----------|
| C | C11 | 0.597070 | 0.727141 | 0.579191 |
| C | C12 | 0.532125 | 0.714602 | 0.529090 |
| O | O13 | 0.510789 | 0.025093 | 0.208635 |
| O | O14 | 0.024402 | 0.532113 | 0.717536 |
| O | O15 | 0.524395 | 0.439649 | 0.210634 |
| O | O16 | 0.013549 | 0.937892 | 0.695061 |
| O | O17 | 0.520860 | 0.950503 | 0.783686 |
| O | O18 | 0.016643 | 0.452634 | 0.292484 |
| O | O19 | 0.515489 | 0.541761 | 0.799606 |
| O | O20 | 0.019550 | 0.040809 | 0.285742 |
| O | O21 | 0.391432 | 0.059300 | 0.268801 |
| O | O22 | 0.142380 | 0.562265 | 0.783971 |
| O | O23 | 0.401781 | 0.434659 | 0.272134 |
| O | O24 | 0.136132 | 0.949352 | 0.751092 |
| O | O25 | 0.640029 | 0.925780 | 0.718160 |
| O | O26 | 0.898028 | 0.430078 | 0.222728 |
| O | O27 | 0.639093 | 0.540688 | 0.746814 |
| O | O28 | 0.893600 | 0.046275 | 0.240283 |
| O | O29 | 0.440320 | 0.108901 | 0.101507 |
| O | O30 | 0.098347 | 0.621595 | 0.622755 |
| O | O31 | 0.441640 | 0.357805 | 0.123440 |
| O | O32 | 0.103912 | 0.866988 | 0.603690 |
| O | O33 | 0.597138 | 0.863173 | 0.877090 |
| O | O34 | 0.937964 | 0.369601 | 0.386565 |
| O | O35 | 0.597973 | 0.617258 | 0.897523 |
| O | O36 | 0.941921 | 0.119339 | 0.388544 |
| O | O37 | 0.404198 | 0.981465 | 0.112627 |
| O | O38 | 0.131115 | 0.493451 | 0.617758 |
| O | O39 | 0.431498 | 0.488723 | 0.095832 |
| O | O40 | 0.097895 | 0.997631 | 0.575808 |
| O | O41 | 0.625616 | 0.992825 | 0.885011 |
| O | O42 | 0.910262 | 0.499615 | 0.386676 |
| O | O43 | 0.602002 | 0.485809 | 0.918634 |
| O | O44 | 0.933268 | 0.987560 | 0.407913 |
| O | O45 | 0.330578 | 0.062611 | 0.439994 |
| O | O46 | 0.198792 | 0.549918 | 0.958063 |
| O | O47 | 0.340151 | 0.451320 | 0.441574 |
| O | O48 | 0.199997 | 0.945469 | 0.919322 |
| O | O49 | 0.702129 | 0.925163 | 0.549645 |
| O | O50 | 0.833856 | 0.425278 | 0.055579 |
| O | O51 | 0.701241 | 0.542821 | 0.576303 |
| O | O52 | 0.833932 | 0.036812 | 0.067234 |
| O | O53 | 0.345226 | 0.945954 | 0.347450 |
| O | O54 | 0.187520 | 0.444171 | 0.836829 |



|   |     |          |          |          |
|---|-----|----------|----------|----------|
| 0 | 055 | 0.334438 | 0.546015 | 0.305116 |
| 0 | 056 | 0.218175 | 0.047779 | 0.798153 |
| 0 | 057 | 0.692747 | 0.038303 | 0.652714 |
| 0 | 058 | 0.847155 | 0.541756 | 0.147283 |
| 0 | 059 | 0.714732 | 0.438173 | 0.694793 |
| 0 | 060 | 0.830514 | 0.935048 | 0.192361 |
| 0 | 061 | 0.262413 | 0.037093 | 0.278248 |
| 0 | 062 | 0.271268 | 0.541257 | 0.797219 |
| 0 | 063 | 0.271651 | 0.430659 | 0.278351 |
| 0 | 064 | 0.264714 | 0.929807 | 0.749178 |
| 0 | 065 | 0.770589 | 0.940583 | 0.713446 |
| 0 | 066 | 0.768181 | 0.449966 | 0.221073 |
| 0 | 067 | 0.768171 | 0.553666 | 0.744512 |
| 0 | 068 | 0.763561 | 0.045558 | 0.230773 |
| 0 | 069 | 0.302176 | 0.129986 | 0.601676 |
| 0 | 070 | 0.228613 | 0.620484 | 0.117167 |
| 0 | 071 | 0.325069 | 0.374489 | 0.596175 |
| 0 | 072 | 0.206208 | 0.864650 | 0.069587 |
| 0 | 073 | 0.727151 | 0.859570 | 0.386063 |
| 0 | 074 | 0.808918 | 0.355296 | 0.894795 |
| 0 | 075 | 0.721319 | 0.620644 | 0.423585 |
| 0 | 076 | 0.820354 | 0.114453 | 0.913478 |
| 0 | 077 | 0.218444 | 0.038100 | 0.535340 |
| 0 | 078 | 0.315389 | 0.535277 | 0.042684 |
| 0 | 079 | 0.219642 | 0.430051 | 0.510161 |
| 0 | 080 | 0.316299 | 0.920879 | 0.997095 |
| 0 | 081 | 0.812880 | 0.949499 | 0.450803 |
| 0 | 082 | 0.722180 | 0.445260 | 0.958824 |
| 0 | 083 | 0.821822 | 0.554575 | 0.506469 |
| 0 | 084 | 0.714854 | 0.055899 | 0.992834 |
| 0 | 085 | 0.331164 | 0.001451 | 0.615262 |
| 0 | 086 | 0.208059 | 0.489239 | 0.129372 |
| 0 | 087 | 0.302551 | 0.503896 | 0.612201 |
| 0 | 088 | 0.231979 | 0.994081 | 0.096312 |
| 0 | 089 | 0.698866 | 0.989972 | 0.380150 |
| 0 | 090 | 0.834596 | 0.484714 | 0.880266 |
| 0 | 091 | 0.733231 | 0.489717 | 0.402088 |
| 0 | 092 | 0.801034 | 0.984350 | 0.893380 |
| 0 | 093 | 0.126759 | 0.126794 | 0.582343 |
| 0 | 094 | 0.406103 | 0.619260 | 0.109275 |
| 0 | 095 | 0.123340 | 0.361882 | 0.594363 |
| 0 | 096 | 0.415846 | 0.853016 | 0.072049 |
| 0 | 097 | 0.902196 | 0.858135 | 0.403477 |
| 0 | 098 | 0.630802 | 0.356430 | 0.911275 |

|   |      |          |          |          |
|---|------|----------|----------|----------|
| 0 | 099  | 0.915070 | 0.629111 | 0.425547 |
| 0 | 0100 | 0.615807 | 0.123543 | 0.913166 |
| 0 | 0101 | 0.119291 | 0.063852 | 0.410249 |
| 0 | 0102 | 0.420832 | 0.561483 | 0.933739 |
| 0 | 0103 | 0.096680 | 0.441348 | 0.445013 |
| 0 | 0104 | 0.437751 | 0.941024 | 0.931953 |
| 0 | 0105 | 0.911306 | 0.921592 | 0.574367 |
| 0 | 0106 | 0.623474 | 0.418746 | 0.083800 |
| 0 | 0107 | 0.945306 | 0.542655 | 0.565226 |
| 0 | 0108 | 0.593430 | 0.041873 | 0.061003 |
| 0 | 0109 | 0.139124 | 0.037453 | 0.218326 |
| 0 | 0110 | 0.395130 | 0.540271 | 0.740980 |
| 0 | 0111 | 0.141676 | 0.420487 | 0.262369 |
| 0 | 0112 | 0.395598 | 0.927558 | 0.745584 |
| 0 | 0113 | 0.895000 | 0.949488 | 0.766449 |
| 0 | 0114 | 0.644077 | 0.445890 | 0.275255 |
| 0 | 0115 | 0.898729 | 0.557742 | 0.749043 |
| 0 | 0116 | 0.634236 | 0.061181 | 0.247048 |
| 0 | 0117 | 0.099996 | 0.942266 | 0.341569 |
| 0 | 0118 | 0.436669 | 0.441787 | 0.855903 |
| 0 | 0119 | 0.110609 | 0.542517 | 0.320047 |
| 0 | 0120 | 0.431020 | 0.045561 | 0.813506 |
| 0 | 0121 | 0.938757 | 0.041614 | 0.642696 |
| 0 | 0122 | 0.602032 | 0.539855 | 0.152070 |
| 0 | 0123 | 0.933146 | 0.438630 | 0.684275 |
| 0 | 0124 | 0.610274 | 0.939790 | 0.183340 |
| 0 | 0125 | 0.223106 | 0.121548 | 0.139548 |
| 0 | 0126 | 0.315318 | 0.627958 | 0.662939 |
| 0 | 0127 | 0.218406 | 0.356453 | 0.138656 |
| 0 | 0128 | 0.328646 | 0.868542 | 0.606036 |
| 0 | 0129 | 0.819981 | 0.858304 | 0.848689 |
| 0 | 0130 | 0.728563 | 0.362509 | 0.355851 |
| 0 | 0131 | 0.830926 | 0.617793 | 0.887166 |
| 0 | 0132 | 0.712728 | 0.122731 | 0.370589 |
| 0 | 0133 | 0.515347 | 0.850216 | 0.202982 |
| 0 | 0134 | 0.023984 | 0.347034 | 0.721484 |
| 0 | 0135 | 0.516677 | 0.630826 | 0.214060 |
| 0 | 0136 | 0.024233 | 0.132631 | 0.705695 |
| 0 | 0137 | 0.522089 | 0.137309 | 0.775880 |
| 0 | 0138 | 0.013333 | 0.630071 | 0.295099 |
| 0 | 0139 | 0.525196 | 0.353192 | 0.794018 |
| 0 | 0140 | 0.008827 | 0.854678 | 0.289357 |
| 0 | 0141 | 0.397439 | 0.823335 | 0.264161 |
| 0 | 0142 | 0.145786 | 0.325229 | 0.780548 |

|   |      |          |          |          |
|---|------|----------|----------|----------|
| 0 | 0143 | 0.403410 | 0.671016 | 0.292659 |
| 0 | 0144 | 0.142456 | 0.153605 | 0.775886 |
| 0 | 0145 | 0.646306 | 0.151715 | 0.726256 |
| 0 | 0146 | 0.893211 | 0.651320 | 0.234142 |
| 0 | 0147 | 0.641664 | 0.330244 | 0.717395 |
| 0 | 0148 | 0.893123 | 0.821115 | 0.214156 |
| 0 | 0149 | 0.457383 | 0.738281 | 0.142981 |
| 0 | 0150 | 0.089699 | 0.242083 | 0.653358 |
| 0 | 0151 | 0.589557 | 0.241969 | 0.841427 |
| 0 | 0152 | 0.951235 | 0.742569 | 0.346076 |
| 0 | 0153 | 0.331279 | 0.813660 | 0.426459 |
| 0 | 0154 | 0.211735 | 0.337766 | 0.945570 |
| 0 | 0155 | 0.336872 | 0.639784 | 0.469762 |
| 0 | 0156 | 0.204436 | 0.136995 | 0.946293 |
| 0 | 0157 | 0.712765 | 0.153111 | 0.561804 |
| 0 | 0158 | 0.824762 | 0.661693 | 0.072695 |
| 0 | 0159 | 0.705469 | 0.346899 | 0.548726 |
| 0 | 0160 | 0.832672 | 0.845127 | 0.043598 |
| 0 | 0161 | 0.256763 | 0.854662 | 0.249996 |
| 0 | 0162 | 0.273663 | 0.354432 | 0.774239 |
| 0 | 0163 | 0.258687 | 0.668885 | 0.296218 |
| 0 | 0164 | 0.273398 | 0.165673 | 0.787828 |
| 0 | 0165 | 0.774844 | 0.126274 | 0.729957 |
| 0 | 0166 | 0.765344 | 0.624026 | 0.238626 |
| 0 | 0167 | 0.772841 | 0.321715 | 0.710715 |
| 0 | 0168 | 0.761708 | 0.823685 | 0.202354 |
| 0 | 0169 | 0.294990 | 0.743363 | 0.581288 |
| 0 | 0170 | 0.242754 | 0.238163 | 0.063035 |
| 0 | 0171 | 0.741166 | 0.244696 | 0.430515 |
| 0 | 0172 | 0.797483 | 0.742322 | 0.926168 |
| 0 | 0173 | 0.216194 | 0.839207 | 0.513331 |
| 0 | 0174 | 0.327755 | 0.337094 | 0.033718 |
| 0 | 0175 | 0.213926 | 0.641589 | 0.534524 |
| 0 | 0176 | 0.325250 | 0.139091 | 0.018911 |
| 0 | 0177 | 0.825306 | 0.145460 | 0.463517 |
| 0 | 0178 | 0.715481 | 0.642738 | 0.969874 |
| 0 | 0179 | 0.826846 | 0.340096 | 0.481658 |
| 0 | 0180 | 0.714251 | 0.842427 | 0.961145 |
| 0 | 0181 | 0.132792 | 0.742678 | 0.566072 |
| 0 | 0182 | 0.408836 | 0.235116 | 0.072556 |
| 0 | 0183 | 0.910384 | 0.244713 | 0.427175 |
| 0 | 0184 | 0.631265 | 0.741655 | 0.930893 |
| 0 | 0185 | 0.103729 | 0.821798 | 0.416212 |
| 0 | 0186 | 0.438969 | 0.321632 | 0.933404 |

|    |       |          |          |          |
|----|-------|----------|----------|----------|
| O  | O187  | 0.103419 | 0.650737 | 0.431488 |
| O  | O188  | 0.435731 | 0.157260 | 0.919094 |
| O  | O189  | 0.931149 | 0.163752 | 0.575490 |
| O  | O190  | 0.610530 | 0.662283 | 0.083676 |
| O  | O191  | 0.941278 | 0.329404 | 0.572783 |
| O  | O192  | 0.605344 | 0.833097 | 0.066361 |
| O  | O193  | 0.128694 | 0.838589 | 0.223110 |
| O  | O194  | 0.401076 | 0.337775 | 0.746029 |
| O  | O195  | 0.133665 | 0.660250 | 0.239678 |
| O  | O196  | 0.398084 | 0.159619 | 0.729840 |
| O  | O197  | 0.901723 | 0.139843 | 0.764499 |
| O  | O198  | 0.638597 | 0.638614 | 0.273640 |
| O  | O199  | 0.899210 | 0.322371 | 0.759669 |
| O  | O200  | 0.636496 | 0.820297 | 0.256438 |
| O  | O201  | 0.211152 | 0.747408 | 0.152674 |
| O  | O202  | 0.318275 | 0.253316 | 0.661419 |
| O  | O203  | 0.818919 | 0.231646 | 0.833148 |
| O  | O204  | 0.721146 | 0.734076 | 0.331392 |
| Al | Al205 | 0.327524 | 0.864609 | 0.316568 |
| Al | Al206 | 0.330707 | 0.629892 | 0.327716 |
| Si | Si207 | 0.711737 | 0.654673 | 0.315526 |
| Si | Si208 | 0.436712 | 0.043800 | 0.172971 |
| Si | Si209 | 0.098350 | 0.551993 | 0.684786 |
| Si | Si210 | 0.448856 | 0.430405 | 0.175691 |
| Si | Si211 | 0.088760 | 0.938034 | 0.656293 |
| Si | Si212 | 0.595435 | 0.933302 | 0.816888 |
| Si | Si213 | 0.941126 | 0.438019 | 0.323125 |
| Si | Si214 | 0.590063 | 0.546478 | 0.840730 |
| Si | Si215 | 0.946243 | 0.048436 | 0.330519 |
| Si | Si216 | 0.332732 | 0.024180 | 0.333300 |
| Si | Si217 | 0.199725 | 0.523861 | 0.844922 |
| Si | Si218 | 0.336647 | 0.466997 | 0.322988 |
| Si | Si219 | 0.204756 | 0.968031 | 0.804791 |
| Si | Si220 | 0.701572 | 0.957962 | 0.659263 |
| Si | Si221 | 0.836740 | 0.461973 | 0.162471 |
| Si | Si222 | 0.705859 | 0.518681 | 0.690746 |
| Si | Si223 | 0.830419 | 0.015891 | 0.183010 |
| Si | Si224 | 0.295699 | 0.058097 | 0.547345 |
| Si | Si225 | 0.237862 | 0.549466 | 0.063241 |
| Si | Si226 | 0.296523 | 0.439163 | 0.539720 |
| Si | Si227 | 0.238492 | 0.930949 | 0.022204 |
| Si | Si228 | 0.735376 | 0.930861 | 0.441045 |
| Si | Si229 | 0.799794 | 0.427413 | 0.947062 |
| Si | Si230 | 0.744416 | 0.551937 | 0.476449 |

|    |       |          |          |          |
|----|-------|----------|----------|----------|
| Si | Si231 | 0.792391 | 0.047858 | 0.966290 |
| Si | Si232 | 0.141085 | 0.056848 | 0.525516 |
| Si | Si233 | 0.393310 | 0.551357 | 0.046326 |
| Si | Si234 | 0.142705 | 0.431678 | 0.541843 |
| Si | Si235 | 0.392933 | 0.924938 | 0.028197 |
| Si | Si236 | 0.889911 | 0.928986 | 0.458907 |
| Si | Si237 | 0.644879 | 0.426268 | 0.968317 |
| Si | Si238 | 0.897950 | 0.556215 | 0.470898 |
| Si | Si239 | 0.637702 | 0.053378 | 0.962865 |
| Si | Si240 | 0.094451 | 0.021085 | 0.314362 |
| Si | Si241 | 0.442214 | 0.521113 | 0.834095 |
| Si | Si242 | 0.091526 | 0.464049 | 0.329361 |
| Si | Si243 | 0.446210 | 0.966255 | 0.818277 |
| Si | Si244 | 0.939853 | 0.962591 | 0.669264 |
| Si | Si245 | 0.598186 | 0.460897 | 0.179885 |
| Si | Si246 | 0.950147 | 0.517623 | 0.679675 |
| Si | Si247 | 0.586868 | 0.017369 | 0.175397 |
| Si | Si248 | 0.214789 | 0.046746 | 0.183614 |
| Si | Si249 | 0.320481 | 0.551367 | 0.705059 |
| Si | Si250 | 0.210590 | 0.424674 | 0.201901 |
| Si | Si251 | 0.329506 | 0.932879 | 0.678991 |
| Si | Si252 | 0.821492 | 0.933683 | 0.805193 |
| Si | Si253 | 0.718858 | 0.437363 | 0.313422 |
| Si | Si254 | 0.832561 | 0.553038 | 0.815516 |
| Si | Si255 | 0.702923 | 0.054705 | 0.307596 |
| Si | Si256 | 0.446196 | 0.816632 | 0.168816 |
| Si | Si257 | 0.095555 | 0.319093 | 0.687611 |
| Si | Si258 | 0.445699 | 0.664436 | 0.190022 |
| Si | Si259 | 0.095865 | 0.163509 | 0.679262 |
| Si | Si260 | 0.593347 | 0.163541 | 0.813988 |
| Si | Si261 | 0.943526 | 0.663563 | 0.324997 |
| Si | Si262 | 0.596720 | 0.320365 | 0.816002 |
| Si | Si263 | 0.939077 | 0.819273 | 0.313074 |
| Si | Si264 | 0.205117 | 0.365295 | 0.833924 |
| Si | Si265 | 0.208940 | 0.125754 | 0.827325 |
| Si | Si266 | 0.706837 | 0.117067 | 0.668399 |
| Si | Si267 | 0.832623 | 0.619242 | 0.173892 |
| Si | Si268 | 0.708227 | 0.359526 | 0.667717 |
| Si | Si269 | 0.830030 | 0.856583 | 0.162714 |
| Si | Si270 | 0.292283 | 0.817784 | 0.531465 |
| Si | Si271 | 0.250458 | 0.317280 | 0.045753 |
| Si | Si272 | 0.286381 | 0.664785 | 0.566607 |
| Si | Si273 | 0.248955 | 0.159266 | 0.041292 |
| Si | Si274 | 0.748126 | 0.166266 | 0.456208 |

|    |       |          |          |          |
|----|-------|----------|----------|----------|
| Si | Si275 | 0.792127 | 0.665904 | 0.963345 |
| Si | Si276 | 0.750462 | 0.323011 | 0.455135 |
| Si | Si277 | 0.791146 | 0.821585 | 0.946321 |
| Si | Si278 | 0.138751 | 0.818530 | 0.524007 |
| Si | Si279 | 0.404170 | 0.313122 | 0.041097 |
| Si | Si280 | 0.135830 | 0.664310 | 0.538171 |
| Si | Si281 | 0.402364 | 0.159952 | 0.028313 |
| Si | Si282 | 0.902249 | 0.167844 | 0.463357 |
| Si | Si283 | 0.638751 | 0.665762 | 0.970833 |
| Si | Si284 | 0.904051 | 0.320894 | 0.467159 |
| Si | Si285 | 0.637370 | 0.820133 | 0.958639 |
| Si | Si286 | 0.086002 | 0.864361 | 0.316437 |
| Si | Si287 | 0.450325 | 0.363614 | 0.832172 |
| Si | Si288 | 0.090503 | 0.620894 | 0.321085 |
| Si | Si289 | 0.446590 | 0.124838 | 0.809993 |
| Si | Si290 | 0.948876 | 0.119285 | 0.672508 |
| Si | Si291 | 0.592130 | 0.617794 | 0.180692 |
| Si | Si292 | 0.949206 | 0.359342 | 0.684072 |
| Si | Si293 | 0.592136 | 0.861150 | 0.176739 |
| Si | Si294 | 0.201877 | 0.826403 | 0.176218 |
| Si | Si295 | 0.329240 | 0.329719 | 0.695670 |
| Si | Si296 | 0.208900 | 0.674142 | 0.202943 |
| Si | Si297 | 0.323494 | 0.175969 | 0.694808 |
| Si | Si298 | 0.828945 | 0.153318 | 0.809180 |
| Si | Si299 | 0.825285 | 0.308705 | 0.799713 |
| Si | Si300 | 0.711682 | 0.810171 | 0.294250 |
| Zn | Zn301 | 0.428825 | 0.776412 | 0.393807 |

**TS-C<sub>4</sub>H<sub>7</sub>Zn-HTransfer-Concerted-Zn<sup>2+</sup> (Fig. 8/TS2 in Black)**

Total energy = -1917.72399419 eV

data\_

\_audit\_creation\_method 'Materials Studio'

\_cell\_length\_a 20.357621

\_cell\_length\_b 20.050598

\_cell\_length\_c 13.476578

\_cell\_angle\_alpha 90.000000

\_cell\_angle\_beta 90.000000

\_cell\_angle\_gamma 90.000000

\_symmetry\_space\_group\_name\_H-M 'P1'

loop\_

\_atom\_site\_type\_symbol

\_atom\_site\_label

\_atom\_site\_fract\_x

\_atom\_site\_fract\_y

\_atom\_site\_fract\_z

|   |     |          |          |          |
|---|-----|----------|----------|----------|
| H | H1  | 0.514447 | 0.797869 | 0.484508 |
| H | H2  | 0.404285 | 0.646597 | 0.512068 |
| H | H3  | 0.537739 | 0.724321 | 0.417047 |
| H | H4  | 0.442014 | 0.656927 | 0.538995 |
| H | H5  | 0.510484 | 0.679305 | 0.753696 |
| H | H6  | 0.466889 | 0.753478 | 0.802163 |
| H | H7  | 0.438681 | 0.787890 | 0.633360 |
| H | H8  | 0.525754 | 0.667306 | 0.572401 |
| C | C9  | 0.500818 | 0.746496 | 0.465761 |
| C | C10 | 0.482273 | 0.724033 | 0.738650 |
| C | C11 | 0.467453 | 0.742985 | 0.645767 |
| C | C12 | 0.491479 | 0.708037 | 0.557538 |
| O | O13 | 0.513553 | 0.026546 | 0.207428 |
| O | O14 | 0.022198 | 0.535490 | 0.715455 |
| O | O15 | 0.524220 | 0.439364 | 0.207351 |
| O | O16 | 0.015385 | 0.938032 | 0.694570 |
| O | O17 | 0.523122 | 0.952320 | 0.780939 |
| O | O18 | 0.015876 | 0.454376 | 0.287348 |
| O | O19 | 0.514368 | 0.544788 | 0.798701 |
| O | O20 | 0.022532 | 0.042283 | 0.286472 |
| O | O21 | 0.394626 | 0.058152 | 0.270411 |
| O | O22 | 0.141438 | 0.560872 | 0.781487 |
| O | O23 | 0.400529 | 0.431011 | 0.264697 |
| O | O24 | 0.138478 | 0.943875 | 0.750366 |
| O | O25 | 0.642528 | 0.926761 | 0.717054 |
| O | O26 | 0.897691 | 0.430033 | 0.217688 |
| O | O27 | 0.636090 | 0.538387 | 0.738946 |
| O | O28 | 0.897007 | 0.046370 | 0.238752 |
| O | O29 | 0.441515 | 0.112545 | 0.105864 |
| O | O30 | 0.098797 | 0.622542 | 0.621403 |
| O | O31 | 0.443622 | 0.360996 | 0.110037 |
| O | O32 | 0.103333 | 0.867164 | 0.597969 |
| O | O33 | 0.598183 | 0.865985 | 0.877012 |
| O | O34 | 0.937839 | 0.370221 | 0.381377 |
| O | O35 | 0.601525 | 0.619005 | 0.887495 |
| O | O36 | 0.943614 | 0.120795 | 0.386753 |
| O | O37 | 0.407394 | 0.984494 | 0.109198 |
| O | O38 | 0.127118 | 0.493057 | 0.615221 |
| O | O39 | 0.432927 | 0.492604 | 0.094690 |
| O | O40 | 0.100903 | 0.998491 | 0.578662 |
| O | O41 | 0.627764 | 0.995844 | 0.882067 |
| O | O42 | 0.908724 | 0.500020 | 0.381436 |

|   |     |          |          |          |
|---|-----|----------|----------|----------|
| 0 | 043 | 0.602081 | 0.487571 | 0.915630 |
| 0 | 044 | 0.935507 | 0.989096 | 0.407855 |
| 0 | 045 | 0.332970 | 0.063026 | 0.440378 |
| 0 | 046 | 0.200397 | 0.552435 | 0.952955 |
| 0 | 047 | 0.339503 | 0.446103 | 0.435728 |
| 0 | 048 | 0.201594 | 0.945183 | 0.919679 |
| 0 | 049 | 0.704528 | 0.925722 | 0.548333 |
| 0 | 050 | 0.833430 | 0.426132 | 0.050601 |
| 0 | 051 | 0.700551 | 0.543714 | 0.571183 |
| 0 | 052 | 0.836253 | 0.038857 | 0.066789 |
| 0 | 053 | 0.348120 | 0.945636 | 0.350745 |
| 0 | 054 | 0.185513 | 0.443335 | 0.840056 |
| 0 | 055 | 0.340398 | 0.545384 | 0.305366 |
| 0 | 056 | 0.214058 | 0.047392 | 0.796781 |
| 0 | 057 | 0.692707 | 0.039863 | 0.647937 |
| 0 | 058 | 0.847411 | 0.542129 | 0.143283 |
| 0 | 059 | 0.715010 | 0.438137 | 0.688087 |
| 0 | 060 | 0.831557 | 0.936430 | 0.190475 |
| 0 | 061 | 0.265693 | 0.036136 | 0.278049 |
| 0 | 062 | 0.270551 | 0.536527 | 0.790766 |
| 0 | 063 | 0.270816 | 0.434360 | 0.271812 |
| 0 | 064 | 0.267772 | 0.931536 | 0.750855 |
| 0 | 065 | 0.772604 | 0.944730 | 0.712108 |
| 0 | 066 | 0.767957 | 0.450343 | 0.216428 |
| 0 | 067 | 0.764883 | 0.554480 | 0.741938 |
| 0 | 068 | 0.766966 | 0.047772 | 0.231509 |
| 0 | 069 | 0.305988 | 0.130008 | 0.602459 |
| 0 | 070 | 0.227337 | 0.620825 | 0.114303 |
| 0 | 071 | 0.316473 | 0.370547 | 0.589352 |
| 0 | 072 | 0.212491 | 0.863497 | 0.069070 |
| 0 | 073 | 0.729685 | 0.858654 | 0.386068 |
| 0 | 074 | 0.809230 | 0.356237 | 0.889598 |
| 0 | 075 | 0.718934 | 0.619646 | 0.416651 |
| 0 | 076 | 0.822539 | 0.116229 | 0.913045 |
| 0 | 077 | 0.221317 | 0.038647 | 0.536882 |
| 0 | 078 | 0.314888 | 0.535038 | 0.043012 |
| 0 | 079 | 0.217267 | 0.435143 | 0.503414 |
| 0 | 080 | 0.319363 | 0.923837 | 0.993870 |
| 0 | 081 | 0.815249 | 0.949585 | 0.448992 |
| 0 | 082 | 0.721678 | 0.445278 | 0.953904 |
| 0 | 083 | 0.821033 | 0.556394 | 0.501057 |
| 0 | 084 | 0.717128 | 0.057072 | 0.992291 |
| 0 | 085 | 0.334237 | 0.001022 | 0.614885 |
| 0 | 086 | 0.205047 | 0.489350 | 0.122571 |



|   |      |          |          |          |
|---|------|----------|----------|----------|
| 0 | 087  | 0.305706 | 0.501487 | 0.606887 |
| 0 | 088  | 0.234074 | 0.993575 | 0.096533 |
| 0 | 089  | 0.701021 | 0.988556 | 0.376827 |
| 0 | 090  | 0.833578 | 0.485992 | 0.875539 |
| 0 | 091  | 0.733561 | 0.488832 | 0.398433 |
| 0 | 092  | 0.803735 | 0.986006 | 0.893096 |
| 0 | 093  | 0.129477 | 0.127435 | 0.582985 |
| 0 | 094  | 0.404303 | 0.622136 | 0.105889 |
| 0 | 095  | 0.124402 | 0.362030 | 0.589606 |
| 0 | 096  | 0.416812 | 0.855225 | 0.073756 |
| 0 | 097  | 0.905539 | 0.859447 | 0.401323 |
| 0 | 098  | 0.629141 | 0.357719 | 0.906706 |
| 0 | 099  | 0.916150 | 0.629308 | 0.422608 |
| 0 | 0100 | 0.619136 | 0.126444 | 0.912967 |
| 0 | 0101 | 0.122215 | 0.063282 | 0.411665 |
| 0 | 0102 | 0.418941 | 0.563451 | 0.931353 |
| 0 | 0103 | 0.093852 | 0.441471 | 0.441315 |
| 0 | 0104 | 0.441369 | 0.939975 | 0.930263 |
| 0 | 0105 | 0.913258 | 0.922149 | 0.573310 |
| 0 | 0106 | 0.623268 | 0.419506 | 0.079880 |
| 0 | 0107 | 0.944113 | 0.541043 | 0.560813 |
| 0 | 0108 | 0.595330 | 0.043423 | 0.058877 |
| 0 | 0109 | 0.142094 | 0.036937 | 0.219769 |
| 0 | 0110 | 0.394639 | 0.540736 | 0.738619 |
| 0 | 0111 | 0.140992 | 0.421175 | 0.259346 |
| 0 | 0112 | 0.398426 | 0.925769 | 0.743954 |
| 0 | 0113 | 0.896941 | 0.949817 | 0.765546 |
| 0 | 0114 | 0.644072 | 0.445961 | 0.271411 |
| 0 | 0115 | 0.895581 | 0.559609 | 0.742525 |
| 0 | 0116 | 0.637294 | 0.061308 | 0.244777 |
| 0 | 0117 | 0.100790 | 0.942110 | 0.342070 |
| 0 | 0118 | 0.438136 | 0.443330 | 0.856024 |
| 0 | 0119 | 0.110593 | 0.543185 | 0.317479 |
| 0 | 0120 | 0.430898 | 0.044839 | 0.812016 |
| 0 | 0121 | 0.940815 | 0.042065 | 0.642019 |
| 0 | 0122 | 0.601358 | 0.540200 | 0.149343 |
| 0 | 0123 | 0.932596 | 0.439864 | 0.685058 |
| 0 | 0124 | 0.611968 | 0.940460 | 0.179288 |
| 0 | 0125 | 0.225699 | 0.120963 | 0.139999 |
| 0 | 0126 | 0.312174 | 0.626660 | 0.660581 |
| 0 | 0127 | 0.217186 | 0.356915 | 0.135508 |
| 0 | 0128 | 0.329195 | 0.867881 | 0.606294 |
| 0 | 0129 | 0.819515 | 0.860074 | 0.846531 |
| 0 | 0130 | 0.728711 | 0.362120 | 0.350955 |

|   |      |          |          |          |
|---|------|----------|----------|----------|
| 0 | 0131 | 0.828647 | 0.619000 | 0.882521 |
| 0 | 0132 | 0.713533 | 0.121424 | 0.372978 |
| 0 | 0133 | 0.516964 | 0.851118 | 0.203382 |
| 0 | 0134 | 0.024463 | 0.348467 | 0.716943 |
| 0 | 0135 | 0.515227 | 0.630837 | 0.211213 |
| 0 | 0136 | 0.026094 | 0.133103 | 0.705139 |
| 0 | 0137 | 0.524182 | 0.134723 | 0.776701 |
| 0 | 0138 | 0.013916 | 0.630967 | 0.290966 |
| 0 | 0139 | 0.524060 | 0.353983 | 0.788682 |
| 0 | 0140 | 0.011283 | 0.853931 | 0.285165 |
| 0 | 0141 | 0.399457 | 0.823037 | 0.265699 |
| 0 | 0142 | 0.145942 | 0.325583 | 0.776299 |
| 0 | 0143 | 0.402480 | 0.673243 | 0.290587 |
| 0 | 0144 | 0.144244 | 0.157051 | 0.775743 |
| 0 | 0145 | 0.647651 | 0.152852 | 0.725104 |
| 0 | 0146 | 0.893188 | 0.651455 | 0.231919 |
| 0 | 0147 | 0.641243 | 0.330913 | 0.713300 |
| 0 | 0148 | 0.894535 | 0.822723 | 0.211934 |
| 0 | 0149 | 0.458264 | 0.739736 | 0.142194 |
| 0 | 0150 | 0.089577 | 0.242752 | 0.650010 |
| 0 | 0151 | 0.588201 | 0.242978 | 0.837215 |
| 0 | 0152 | 0.951444 | 0.743015 | 0.343168 |
| 0 | 0153 | 0.332958 | 0.811619 | 0.428051 |
| 0 | 0154 | 0.210602 | 0.334242 | 0.942743 |
| 0 | 0155 | 0.338890 | 0.644959 | 0.468680 |
| 0 | 0156 | 0.205613 | 0.136147 | 0.946740 |
| 0 | 0157 | 0.715424 | 0.156320 | 0.562405 |
| 0 | 0158 | 0.827008 | 0.662259 | 0.068704 |
| 0 | 0159 | 0.705181 | 0.345861 | 0.543981 |
| 0 | 0160 | 0.833575 | 0.846626 | 0.041538 |
| 0 | 0161 | 0.259495 | 0.855267 | 0.252047 |
| 0 | 0162 | 0.273692 | 0.356093 | 0.774113 |
| 0 | 0163 | 0.260475 | 0.664771 | 0.294831 |
| 0 | 0164 | 0.275619 | 0.162376 | 0.789082 |
| 0 | 0165 | 0.775788 | 0.124642 | 0.730250 |
| 0 | 0166 | 0.765123 | 0.624447 | 0.232807 |
| 0 | 0167 | 0.772572 | 0.321704 | 0.706428 |
| 0 | 0168 | 0.763067 | 0.825069 | 0.200697 |
| 0 | 0169 | 0.292990 | 0.742901 | 0.584109 |
| 0 | 0170 | 0.243907 | 0.237744 | 0.063599 |
| 0 | 0171 | 0.742811 | 0.244529 | 0.425694 |
| 0 | 0172 | 0.798456 | 0.743834 | 0.923840 |
| 0 | 0173 | 0.217252 | 0.840058 | 0.511642 |
| 0 | 0174 | 0.326674 | 0.338188 | 0.031405 |

|    |       |          |          |          |
|----|-------|----------|----------|----------|
| O  | O175  | 0.214041 | 0.641068 | 0.530182 |
| O  | O176  | 0.326921 | 0.139324 | 0.018153 |
| O  | O177  | 0.827056 | 0.145892 | 0.462684 |
| O  | O178  | 0.715495 | 0.645895 | 0.971652 |
| O  | O179  | 0.826923 | 0.341148 | 0.477532 |
| O  | O180  | 0.714785 | 0.842967 | 0.960754 |
| O  | O181  | 0.133772 | 0.742819 | 0.563496 |
| O  | O182  | 0.409345 | 0.237234 | 0.068142 |
| O  | O183  | 0.911256 | 0.245706 | 0.426140 |
| O  | O184  | 0.630544 | 0.743215 | 0.926306 |
| O  | O185  | 0.106162 | 0.820530 | 0.411764 |
| O  | O186  | 0.433913 | 0.320230 | 0.922237 |
| O  | O187  | 0.101846 | 0.650714 | 0.430621 |
| O  | O188  | 0.438781 | 0.154974 | 0.920764 |
| O  | O189  | 0.933309 | 0.164281 | 0.574067 |
| O  | O190  | 0.605839 | 0.661513 | 0.075767 |
| O  | O191  | 0.941525 | 0.332850 | 0.568602 |
| O  | O192  | 0.605899 | 0.832188 | 0.065584 |
| O  | O193  | 0.131831 | 0.841064 | 0.219691 |
| O  | O194  | 0.400337 | 0.345625 | 0.734995 |
| O  | O195  | 0.134882 | 0.661603 | 0.239673 |
| O  | O196  | 0.400535 | 0.160784 | 0.731968 |
| O  | O197  | 0.902944 | 0.140569 | 0.762527 |
| O  | O198  | 0.638177 | 0.641674 | 0.265421 |
| O  | O199  | 0.899409 | 0.322111 | 0.754707 |
| O  | O200  | 0.638083 | 0.821944 | 0.256035 |
| O  | O201  | 0.214645 | 0.747450 | 0.155381 |
| O  | O202  | 0.318853 | 0.253010 | 0.665995 |
| O  | O203  | 0.818952 | 0.232198 | 0.829181 |
| O  | O204  | 0.722344 | 0.734105 | 0.327487 |
| Al | Al205 | 0.329861 | 0.864567 | 0.319819 |
| Al | Al206 | 0.332090 | 0.628150 | 0.336327 |
| Si | Si207 | 0.711379 | 0.655168 | 0.309264 |
| Si | Si208 | 0.439255 | 0.045535 | 0.173220 |
| Si | Si209 | 0.096916 | 0.552831 | 0.682545 |
| Si | Si210 | 0.448973 | 0.431132 | 0.169776 |
| Si | Si211 | 0.090509 | 0.936893 | 0.655257 |
| Si | Si212 | 0.597605 | 0.935658 | 0.815378 |
| Si | Si213 | 0.940659 | 0.438754 | 0.318118 |
| Si | Si214 | 0.589887 | 0.546853 | 0.835955 |
| Si | Si215 | 0.948907 | 0.049571 | 0.329899 |
| Si | Si216 | 0.335525 | 0.023716 | 0.334540 |
| Si | Si217 | 0.199414 | 0.523017 | 0.841679 |
| Si | Si218 | 0.337552 | 0.466093 | 0.318563 |

|    |       |          |          |          |
|----|-------|----------|----------|----------|
| Si | Si219 | 0.205511 | 0.967049 | 0.804723 |
| Si | Si220 | 0.703420 | 0.959847 | 0.657136 |
| Si | Si221 | 0.836575 | 0.462368 | 0.157801 |
| Si | Si222 | 0.704484 | 0.518314 | 0.685157 |
| Si | Si223 | 0.833017 | 0.017293 | 0.182274 |
| Si | Si224 | 0.298655 | 0.058282 | 0.548072 |
| Si | Si225 | 0.236955 | 0.550218 | 0.059848 |
| Si | Si226 | 0.294660 | 0.438223 | 0.533522 |
| Si | Si227 | 0.241531 | 0.931131 | 0.021455 |
| Si | Si228 | 0.737906 | 0.930535 | 0.439532 |
| Si | Si229 | 0.799459 | 0.428153 | 0.942111 |
| Si | Si230 | 0.743799 | 0.552096 | 0.471013 |
| Si | Si231 | 0.794775 | 0.049561 | 0.965815 |
| Si | Si232 | 0.143927 | 0.057187 | 0.527093 |
| Si | Si233 | 0.392243 | 0.553224 | 0.044530 |
| Si | Si234 | 0.140861 | 0.432909 | 0.537449 |
| Si | Si235 | 0.395610 | 0.926865 | 0.026785 |
| Si | Si236 | 0.892527 | 0.929788 | 0.457609 |
| Si | Si237 | 0.644328 | 0.427021 | 0.964367 |
| Si | Si238 | 0.897493 | 0.556407 | 0.466378 |
| Si | Si239 | 0.640145 | 0.055598 | 0.961480 |
| Si | Si240 | 0.096988 | 0.021093 | 0.315493 |
| Si | Si241 | 0.441038 | 0.522614 | 0.832365 |
| Si | Si242 | 0.090666 | 0.464940 | 0.325754 |
| Si | Si243 | 0.448183 | 0.965985 | 0.816538 |
| Si | Si244 | 0.941891 | 0.962992 | 0.668383 |
| Si | Si245 | 0.597797 | 0.461075 | 0.176490 |
| Si | Si246 | 0.948701 | 0.518929 | 0.676612 |
| Si | Si247 | 0.589289 | 0.018348 | 0.173087 |
| Si | Si248 | 0.217514 | 0.046175 | 0.184133 |
| Si | Si249 | 0.320073 | 0.550328 | 0.699611 |
| Si | Si250 | 0.209291 | 0.425915 | 0.197231 |
| Si | Si251 | 0.331493 | 0.932518 | 0.678672 |
| Si | Si252 | 0.823114 | 0.935646 | 0.804025 |
| Si | Si253 | 0.718960 | 0.437097 | 0.308959 |
| Si | Si254 | 0.830385 | 0.554285 | 0.810874 |
| Si | Si255 | 0.705317 | 0.054602 | 0.306907 |
| Si | Si256 | 0.447602 | 0.818001 | 0.169341 |
| Si | Si257 | 0.095943 | 0.319986 | 0.683200 |
| Si | Si258 | 0.444642 | 0.665576 | 0.187154 |
| Si | Si259 | 0.097496 | 0.164781 | 0.678600 |
| Si | Si260 | 0.594632 | 0.164281 | 0.812856 |
| Si | Si261 | 0.944215 | 0.663980 | 0.321935 |
| Si | Si262 | 0.595548 | 0.321327 | 0.811271 |

|    |       |          |          |          |
|----|-------|----------|----------|----------|
| Si | Si263 | 0.941080 | 0.819946 | 0.310270 |
| Si | Si264 | 0.204387 | 0.364979 | 0.832775 |
| Si | Si265 | 0.209165 | 0.125500 | 0.827447 |
| Si | Si266 | 0.708096 | 0.118166 | 0.667149 |
| Si | Si267 | 0.833321 | 0.619630 | 0.170042 |
| Si | Si268 | 0.707994 | 0.359200 | 0.662806 |
| Si | Si269 | 0.831347 | 0.858012 | 0.160774 |
| Si | Si270 | 0.292418 | 0.816181 | 0.532667 |
| Si | Si271 | 0.249741 | 0.316873 | 0.043878 |
| Si | Si272 | 0.287929 | 0.663771 | 0.560342 |
| Si | Si273 | 0.250486 | 0.158939 | 0.041277 |
| Si | Si274 | 0.749908 | 0.166772 | 0.455433 |
| Si | Si275 | 0.792442 | 0.667468 | 0.960924 |
| Si | Si276 | 0.750872 | 0.322982 | 0.450502 |
| Si | Si277 | 0.791819 | 0.822990 | 0.944565 |
| Si | Si278 | 0.139896 | 0.818194 | 0.520653 |
| Si | Si279 | 0.403223 | 0.314495 | 0.033381 |
| Si | Si280 | 0.136809 | 0.664230 | 0.535909 |
| Si | Si281 | 0.403783 | 0.160951 | 0.028477 |
| Si | Si282 | 0.903921 | 0.168789 | 0.462229 |
| Si | Si283 | 0.638494 | 0.667130 | 0.965987 |
| Si | Si284 | 0.904343 | 0.322412 | 0.463497 |
| Si | Si285 | 0.637885 | 0.821220 | 0.957195 |
| Si | Si286 | 0.088249 | 0.864390 | 0.313514 |
| Si | Si287 | 0.448909 | 0.365676 | 0.825308 |
| Si | Si288 | 0.090891 | 0.621736 | 0.319407 |
| Si | Si289 | 0.448391 | 0.123883 | 0.810750 |
| Si | Si290 | 0.950807 | 0.119859 | 0.671328 |
| Si | Si291 | 0.590407 | 0.618297 | 0.175298 |
| Si | Si292 | 0.949439 | 0.360836 | 0.680927 |
| Si | Si293 | 0.593598 | 0.861848 | 0.175489 |
| Si | Si294 | 0.205692 | 0.826587 | 0.176583 |
| Si | Si295 | 0.327114 | 0.331084 | 0.692334 |
| Si | Si296 | 0.210659 | 0.673321 | 0.203123 |
| Si | Si297 | 0.325577 | 0.175581 | 0.696913 |
| Si | Si298 | 0.830215 | 0.153773 | 0.807470 |
| Si | Si299 | 0.825454 | 0.309105 | 0.795042 |
| Si | Si300 | 0.713422 | 0.810739 | 0.292740 |
| Zn | Zn301 | 0.420149 | 0.760376 | 0.382956 |

**C<sub>4</sub>H<sub>6</sub>-Phys.Ads-H<sub>2</sub>-Phys.Ads-Zn<sup>2+</sup> (Fig. 8/M3 in Black)**

Total energy = -1919.54376110 eV

data\_

```

_audit_creation_method    'Materials Studio'
_cell_length_a           20.357621
_cell_length_b           20.050598
_cell_length_c           13.476578
_cell_angle_alpha        90.000000
_cell_angle_beta         90.000000
_cell_angle_gamma        90.000000
_symmetry_space_group_name_H-M  'P1'
loop_
_atom_site_type_symbol
_atom_site_label
_atom_site_fract_x
_atom_site_fract_y
_atom_site_fract_z
  H      H1          0.502188          0.816481          0.442811
  H      H2          0.476951          0.557901          0.489871
  H      H3          0.523462          0.732709          0.394306
  H      H4          0.475482          0.555195          0.544537
  H      H5          0.493884          0.691488          0.734769
  H      H6          0.478696          0.773685          0.793117
  H      H7          0.473482          0.826612          0.628603
  H      H8          0.501337          0.682170          0.555098
  C      C9          0.501256          0.762626          0.452812
  C      C10         0.484668          0.744540          0.725872
  C      C11         0.482254          0.773306          0.635467
  C      C12         0.494827          0.735793          0.546261
  O      O13         0.514807          0.029262          0.209267
  O      O14         0.021250          0.539057          0.714841
  O      O15         0.523182          0.439611          0.208274
  O      O16         0.016917          0.941380          0.702165
  O      O17         0.525533          0.950239          0.788369
  O      O18         0.014609          0.455647          0.285794
  O      O19         0.514657          0.548743          0.801558
  O      O20         0.023710          0.040722          0.288438
  O      O21         0.395683          0.059455          0.271544
  O      O22         0.141957          0.558268          0.775834
  O      O23         0.398225          0.429514          0.260216
  O      O24         0.140860          0.942724          0.755191
  O      O25         0.644041          0.927265          0.720183
  O      O26         0.895831          0.427042          0.220123
  O      O27         0.635249          0.535611          0.738899
  O      O28         0.898281          0.046275          0.242883
  O      O29         0.442839          0.116755          0.109433
  O      O30         0.100451          0.620418          0.614504

```

|   |     |          |          |          |
|---|-----|----------|----------|----------|
| 0 | 031 | 0.443918 | 0.364900 | 0.102461 |
| 0 | 032 | 0.100383 | 0.864496 | 0.607153 |
| 0 | 033 | 0.602610 | 0.865629 | 0.881463 |
| 0 | 034 | 0.939729 | 0.371062 | 0.384837 |
| 0 | 035 | 0.606084 | 0.619602 | 0.885892 |
| 0 | 036 | 0.946740 | 0.121286 | 0.388898 |
| 0 | 037 | 0.410018 | 0.988898 | 0.106545 |
| 0 | 038 | 0.121664 | 0.490062 | 0.611354 |
| 0 | 039 | 0.434351 | 0.496452 | 0.095714 |
| 0 | 040 | 0.103828 | 0.995187 | 0.581370 |
| 0 | 041 | 0.631095 | 0.995766 | 0.886210 |
| 0 | 042 | 0.907393 | 0.500315 | 0.379978 |
| 0 | 043 | 0.601382 | 0.488393 | 0.917297 |
| 0 | 044 | 0.937066 | 0.989944 | 0.412762 |
| 0 | 045 | 0.336744 | 0.059692 | 0.444463 |
| 0 | 046 | 0.205550 | 0.543639 | 0.941919 |
| 0 | 047 | 0.337996 | 0.430695 | 0.434089 |
| 0 | 048 | 0.202378 | 0.947794 | 0.926445 |
| 0 | 049 | 0.705464 | 0.925033 | 0.551004 |
| 0 | 050 | 0.832908 | 0.427093 | 0.051776 |
| 0 | 051 | 0.699892 | 0.543116 | 0.572007 |
| 0 | 052 | 0.838629 | 0.037744 | 0.070077 |
| 0 | 053 | 0.349088 | 0.945528 | 0.345710 |
| 0 | 054 | 0.196571 | 0.441497 | 0.815213 |
| 0 | 055 | 0.344583 | 0.541566 | 0.326995 |
| 0 | 056 | 0.215244 | 0.047739 | 0.798026 |
| 0 | 057 | 0.694792 | 0.039730 | 0.648756 |
| 0 | 058 | 0.848911 | 0.541444 | 0.148829 |
| 0 | 059 | 0.717148 | 0.437802 | 0.688828 |
| 0 | 060 | 0.832801 | 0.936266 | 0.195513 |
| 0 | 061 | 0.266727 | 0.040245 | 0.282810 |
| 0 | 062 | 0.271768 | 0.545125 | 0.774642 |
| 0 | 063 | 0.268571 | 0.440162 | 0.271238 |
| 0 | 064 | 0.270498 | 0.932032 | 0.760566 |
| 0 | 065 | 0.774071 | 0.944755 | 0.714489 |
| 0 | 066 | 0.766462 | 0.450727 | 0.216760 |
| 0 | 067 | 0.763567 | 0.555393 | 0.743637 |
| 0 | 068 | 0.768474 | 0.048199 | 0.233939 |
| 0 | 069 | 0.305423 | 0.130065 | 0.601973 |
| 0 | 070 | 0.219777 | 0.621278 | 0.095721 |
| 0 | 071 | 0.307304 | 0.366680 | 0.597232 |
| 0 | 072 | 0.213405 | 0.865323 | 0.075581 |
| 0 | 073 | 0.733173 | 0.858318 | 0.389253 |
| 0 | 074 | 0.809168 | 0.357416 | 0.890384 |

|   |      |          |          |          |
|---|------|----------|----------|----------|
| 0 | 075  | 0.718799 | 0.618885 | 0.417070 |
| 0 | 076  | 0.825434 | 0.116817 | 0.917822 |
| 0 | 077  | 0.223052 | 0.036897 | 0.536328 |
| 0 | 078  | 0.315115 | 0.536280 | 0.048316 |
| 0 | 079  | 0.215562 | 0.435153 | 0.502855 |
| 0 | 080  | 0.320498 | 0.924357 | 0.999435 |
| 0 | 081  | 0.817190 | 0.949964 | 0.455453 |
| 0 | 082  | 0.721009 | 0.445829 | 0.955304 |
| 0 | 083  | 0.820040 | 0.554743 | 0.501590 |
| 0 | 084  | 0.719584 | 0.058024 | 0.997027 |
| 0 | 085  | 0.334822 | 0.002720 | 0.622817 |
| 0 | 086  | 0.203274 | 0.489264 | 0.117860 |
| 0 | 087  | 0.310204 | 0.498750 | 0.597958 |
| 0 | 088  | 0.236545 | 0.995333 | 0.102679 |
| 0 | 089  | 0.703480 | 0.987643 | 0.379026 |
| 0 | 090  | 0.832747 | 0.487244 | 0.877176 |
| 0 | 091  | 0.731472 | 0.488050 | 0.399011 |
| 0 | 092  | 0.804692 | 0.987104 | 0.895352 |
| 0 | 093  | 0.131000 | 0.124513 | 0.587925 |
| 0 | 094  | 0.406020 | 0.625132 | 0.100638 |
| 0 | 095  | 0.124638 | 0.359127 | 0.589147 |
| 0 | 096  | 0.413714 | 0.857216 | 0.092565 |
| 0 | 097  | 0.906973 | 0.860205 | 0.405196 |
| 0 | 098  | 0.629026 | 0.358261 | 0.906865 |
| 0 | 099  | 0.915719 | 0.628768 | 0.427053 |
| 0 | 0100 | 0.622478 | 0.126620 | 0.914460 |
| 0 | 0101 | 0.121932 | 0.062559 | 0.415667 |
| 0 | 0102 | 0.415246 | 0.563275 | 0.928021 |
| 0 | 0103 | 0.092590 | 0.436163 | 0.438366 |
| 0 | 0104 | 0.443779 | 0.929369 | 0.937174 |
| 0 | 0105 | 0.916610 | 0.921651 | 0.577596 |
| 0 | 0106 | 0.622141 | 0.418851 | 0.080378 |
| 0 | 0107 | 0.942768 | 0.536893 | 0.560905 |
| 0 | 0108 | 0.597379 | 0.044890 | 0.061646 |
| 0 | 0109 | 0.143532 | 0.040261 | 0.223111 |
| 0 | 0110 | 0.397303 | 0.534451 | 0.734825 |
| 0 | 0111 | 0.139295 | 0.422436 | 0.255613 |
| 0 | 0112 | 0.401164 | 0.928487 | 0.750221 |
| 0 | 0113 | 0.897848 | 0.947639 | 0.770070 |
| 0 | 0114 | 0.643076 | 0.441457 | 0.272893 |
| 0 | 0115 | 0.894258 | 0.559281 | 0.741735 |
| 0 | 0116 | 0.638931 | 0.060906 | 0.248348 |
| 0 | 0117 | 0.104470 | 0.942118 | 0.341798 |
| 0 | 0118 | 0.443879 | 0.443592 | 0.860111 |



|   |      |          |          |          |
|---|------|----------|----------|----------|
| 0 | 0119 | 0.110217 | 0.542585 | 0.323577 |
| 0 | 0120 | 0.436626 | 0.042059 | 0.836890 |
| 0 | 0121 | 0.938610 | 0.042060 | 0.647132 |
| 0 | 0122 | 0.603548 | 0.538824 | 0.153862 |
| 0 | 0123 | 0.935066 | 0.439243 | 0.691614 |
| 0 | 0124 | 0.611439 | 0.941019 | 0.180766 |
| 0 | 0125 | 0.226956 | 0.123831 | 0.141776 |
| 0 | 0126 | 0.328189 | 0.624915 | 0.642232 |
| 0 | 0127 | 0.219239 | 0.357064 | 0.139548 |
| 0 | 0128 | 0.331376 | 0.870214 | 0.614784 |
| 0 | 0129 | 0.817478 | 0.860465 | 0.851398 |
| 0 | 0130 | 0.731065 | 0.361169 | 0.351832 |
| 0 | 0131 | 0.829161 | 0.620203 | 0.882311 |
| 0 | 0132 | 0.715090 | 0.120492 | 0.377319 |
| 0 | 0133 | 0.517960 | 0.851236 | 0.213738 |
| 0 | 0134 | 0.026266 | 0.346720 | 0.719998 |
| 0 | 0135 | 0.515751 | 0.629111 | 0.211247 |
| 0 | 0136 | 0.026525 | 0.130995 | 0.708069 |
| 0 | 0137 | 0.525321 | 0.133044 | 0.781893 |
| 0 | 0138 | 0.014959 | 0.631481 | 0.298665 |
| 0 | 0139 | 0.525194 | 0.352014 | 0.787136 |
| 0 | 0140 | 0.013752 | 0.853212 | 0.291784 |
| 0 | 0141 | 0.401157 | 0.817187 | 0.280179 |
| 0 | 0142 | 0.148366 | 0.322749 | 0.775832 |
| 0 | 0143 | 0.402302 | 0.669400 | 0.287563 |
| 0 | 0144 | 0.143934 | 0.156640 | 0.779547 |
| 0 | 0145 | 0.647564 | 0.151792 | 0.724881 |
| 0 | 0146 | 0.894425 | 0.651415 | 0.236251 |
| 0 | 0147 | 0.643296 | 0.330329 | 0.714290 |
| 0 | 0148 | 0.897599 | 0.823331 | 0.215853 |
| 0 | 0149 | 0.461117 | 0.740671 | 0.147212 |
| 0 | 0150 | 0.089587 | 0.240496 | 0.651077 |
| 0 | 0151 | 0.590066 | 0.242378 | 0.838154 |
| 0 | 0152 | 0.951650 | 0.743002 | 0.348977 |
| 0 | 0153 | 0.331024 | 0.814619 | 0.438028 |
| 0 | 0154 | 0.206688 | 0.343322 | 0.947180 |
| 0 | 0155 | 0.337390 | 0.664797 | 0.453253 |
| 0 | 0156 | 0.207341 | 0.135568 | 0.947903 |
| 0 | 0157 | 0.719574 | 0.156752 | 0.566276 |
| 0 | 0158 | 0.830821 | 0.660548 | 0.070323 |
| 0 | 0159 | 0.706833 | 0.345580 | 0.544852 |
| 0 | 0160 | 0.836768 | 0.847192 | 0.045634 |
| 0 | 0161 | 0.262028 | 0.849002 | 0.256727 |
| 0 | 0162 | 0.278398 | 0.340392 | 0.785618 |

|    |       |          |          |          |
|----|-------|----------|----------|----------|
| 0  | 0163  | 0.260062 | 0.653596 | 0.277832 |
| 0  | 0164  | 0.275253 | 0.164085 | 0.787801 |
| 0  | 0165  | 0.775693 | 0.124072 | 0.737063 |
| 0  | 0166  | 0.765961 | 0.625659 | 0.233503 |
| 0  | 0167  | 0.774607 | 0.321374 | 0.707018 |
| 0  | 0168  | 0.766098 | 0.823788 | 0.204260 |
| 0  | 0169  | 0.293781 | 0.745487 | 0.594175 |
| 0  | 0170  | 0.242865 | 0.240160 | 0.057888 |
| 0  | 0171  | 0.744898 | 0.243973 | 0.427467 |
| 0  | 0172  | 0.799893 | 0.744230 | 0.929182 |
| 0  | 0173  | 0.216943 | 0.843933 | 0.525902 |
| 0  | 0174  | 0.325750 | 0.340675 | 0.027876 |
| 0  | 0175  | 0.219285 | 0.641818 | 0.535519 |
| 0  | 0176  | 0.328029 | 0.141642 | 0.020544 |
| 0  | 0177  | 0.829727 | 0.145738 | 0.462938 |
| 0  | 0178  | 0.717733 | 0.645774 | 0.977324 |
| 0  | 0179  | 0.828721 | 0.340853 | 0.479519 |
| 0  | 0180  | 0.716231 | 0.842209 | 0.973367 |
| 0  | 0181  | 0.136734 | 0.742144 | 0.567567 |
| 0  | 0182  | 0.408613 | 0.240836 | 0.069963 |
| 0  | 0183  | 0.913990 | 0.246102 | 0.428974 |
| 0  | 0184  | 0.632991 | 0.743159 | 0.931153 |
| 0  | 0185  | 0.108923 | 0.822377 | 0.418852 |
| 0  | 0186  | 0.431875 | 0.319390 | 0.917459 |
| 0  | 0187  | 0.111197 | 0.654817 | 0.426046 |
| 0  | 0188  | 0.439685 | 0.159650 | 0.923497 |
| 0  | 0189  | 0.934963 | 0.163973 | 0.576394 |
| 0  | 0190  | 0.605781 | 0.659016 | 0.075751 |
| 0  | 0191  | 0.942773 | 0.333417 | 0.572042 |
| 0  | 0192  | 0.603699 | 0.831404 | 0.070350 |
| 0  | 0193  | 0.133814 | 0.837900 | 0.225584 |
| 0  | 0194  | 0.402124 | 0.352784 | 0.730718 |
| 0  | 0195  | 0.133212 | 0.657744 | 0.231878 |
| 0  | 0196  | 0.400510 | 0.147928 | 0.735101 |
| 0  | 0197  | 0.903292 | 0.142676 | 0.764808 |
| 0  | 0198  | 0.638696 | 0.642776 | 0.265783 |
| 0  | 0199  | 0.900871 | 0.321244 | 0.758316 |
| 0  | 0200  | 0.640671 | 0.823791 | 0.259285 |
| 0  | 0201  | 0.214126 | 0.745831 | 0.152361 |
| 0  | 0202  | 0.332529 | 0.249468 | 0.666991 |
| 0  | 0203  | 0.818743 | 0.232807 | 0.833247 |
| 0  | 0204  | 0.722791 | 0.734089 | 0.330746 |
| Al | Al205 | 0.331535 | 0.862953 | 0.325219 |
| Al | Al206 | 0.330827 | 0.625531 | 0.333353 |

|    |       |          |          |          |
|----|-------|----------|----------|----------|
| Si | Si207 | 0.711914 | 0.655396 | 0.310395 |
| Si | Si208 | 0.440716 | 0.048520 | 0.174290 |
| Si | Si209 | 0.096052 | 0.551946 | 0.678205 |
| Si | Si210 | 0.448476 | 0.432773 | 0.167572 |
| Si | Si211 | 0.091526 | 0.936053 | 0.661546 |
| Si | Si212 | 0.600804 | 0.935287 | 0.820334 |
| Si | Si213 | 0.940074 | 0.438474 | 0.318770 |
| Si | Si214 | 0.590621 | 0.547574 | 0.836658 |
| Si | Si215 | 0.950665 | 0.049501 | 0.333272 |
| Si | Si216 | 0.337140 | 0.024147 | 0.335670 |
| Si | Si217 | 0.204048 | 0.521642 | 0.827509 |
| Si | Si218 | 0.337449 | 0.462267 | 0.322383 |
| Si | Si219 | 0.206965 | 0.967596 | 0.810659 |
| Si | Si220 | 0.704907 | 0.959738 | 0.659445 |
| Si | Si221 | 0.835971 | 0.461803 | 0.160054 |
| Si | Si222 | 0.704396 | 0.517712 | 0.685884 |
| Si | Si223 | 0.834622 | 0.017054 | 0.185900 |
| Si | Si224 | 0.299948 | 0.057286 | 0.550425 |
| Si | Si225 | 0.235941 | 0.548358 | 0.052281 |
| Si | Si226 | 0.293027 | 0.432876 | 0.532752 |
| Si | Si227 | 0.242839 | 0.932666 | 0.027668 |
| Si | Si228 | 0.740192 | 0.930189 | 0.443100 |
| Si | Si229 | 0.798871 | 0.429103 | 0.943355 |
| Si | Si230 | 0.742801 | 0.551122 | 0.471541 |
| Si | Si231 | 0.797030 | 0.049994 | 0.969598 |
| Si | Si232 | 0.145398 | 0.055027 | 0.530056 |
| Si | Si233 | 0.392176 | 0.555045 | 0.043187 |
| Si | Si234 | 0.139019 | 0.430016 | 0.535521 |
| Si | Si235 | 0.396499 | 0.925834 | 0.034350 |
| Si | Si236 | 0.894604 | 0.930215 | 0.462505 |
| Si | Si237 | 0.643616 | 0.427445 | 0.965212 |
| Si | Si238 | 0.896498 | 0.555045 | 0.467328 |
| Si | Si239 | 0.642888 | 0.056224 | 0.964779 |
| Si | Si240 | 0.098538 | 0.021242 | 0.317685 |
| Si | Si241 | 0.442153 | 0.522249 | 0.832019 |
| Si | Si242 | 0.089480 | 0.464377 | 0.325227 |
| Si | Si243 | 0.451376 | 0.962973 | 0.828033 |
| Si | Si244 | 0.942821 | 0.963112 | 0.673700 |
| Si | Si245 | 0.597481 | 0.459489 | 0.178320 |
| Si | Si246 | 0.948362 | 0.518479 | 0.677979 |
| Si | Si247 | 0.590433 | 0.019383 | 0.175565 |
| Si | Si248 | 0.219065 | 0.049389 | 0.187900 |
| Si | Si249 | 0.325957 | 0.549904 | 0.687380 |
| Si | Si250 | 0.208371 | 0.427697 | 0.195945 |

|    |       |          |          |          |
|----|-------|----------|----------|----------|
| Si | Si251 | 0.333482 | 0.934536 | 0.687245 |
| Si | Si252 | 0.823492 | 0.935486 | 0.807686 |
| Si | Si253 | 0.718405 | 0.435661 | 0.309872 |
| Si | Si254 | 0.829645 | 0.555060 | 0.811443 |
| Si | Si255 | 0.707094 | 0.054170 | 0.310033 |
| Si | Si256 | 0.448240 | 0.817149 | 0.182599 |
| Si | Si257 | 0.097117 | 0.317724 | 0.684003 |
| Si | Si258 | 0.446105 | 0.665379 | 0.185818 |
| Si | Si259 | 0.097838 | 0.162887 | 0.681574 |
| Si | Si260 | 0.596123 | 0.163546 | 0.814685 |
| Si | Si261 | 0.944745 | 0.663969 | 0.327334 |
| Si | Si262 | 0.596919 | 0.320659 | 0.811448 |
| Si | Si263 | 0.943015 | 0.820022 | 0.315356 |
| Si | Si264 | 0.207523 | 0.362177 | 0.830706 |
| Si | Si265 | 0.210055 | 0.125860 | 0.828553 |
| Si | Si266 | 0.709681 | 0.117890 | 0.669935 |
| Si | Si267 | 0.835112 | 0.619349 | 0.173253 |
| Si | Si268 | 0.709903 | 0.358861 | 0.663665 |
| Si | Si269 | 0.833985 | 0.857954 | 0.165044 |
| Si | Si270 | 0.292064 | 0.819169 | 0.543981 |
| Si | Si271 | 0.248868 | 0.319839 | 0.043231 |
| Si | Si272 | 0.293884 | 0.668577 | 0.555418 |
| Si | Si273 | 0.251313 | 0.160808 | 0.041775 |
| Si | Si274 | 0.752479 | 0.166415 | 0.458005 |
| Si | Si275 | 0.794489 | 0.667379 | 0.964082 |
| Si | Si276 | 0.752853 | 0.322471 | 0.451874 |
| Si | Si277 | 0.792860 | 0.823171 | 0.951060 |
| Si | Si278 | 0.140325 | 0.818635 | 0.529111 |
| Si | Si279 | 0.402273 | 0.316862 | 0.029711 |
| Si | Si280 | 0.141832 | 0.664402 | 0.535403 |
| Si | Si281 | 0.404556 | 0.164273 | 0.031374 |
| Si | Si282 | 0.906461 | 0.169019 | 0.464099 |
| Si | Si283 | 0.640784 | 0.666503 | 0.968065 |
| Si | Si284 | 0.906318 | 0.322754 | 0.466424 |
| Si | Si285 | 0.639421 | 0.820716 | 0.964324 |
| Si | Si286 | 0.090939 | 0.863841 | 0.318485 |
| Si | Si287 | 0.450652 | 0.366588 | 0.823788 |
| Si | Si288 | 0.092851 | 0.621722 | 0.319767 |
| Si | Si289 | 0.450382 | 0.120927 | 0.819287 |
| Si | Si290 | 0.950876 | 0.119837 | 0.674466 |
| Si | Si291 | 0.591297 | 0.617064 | 0.176586 |
| Si | Si292 | 0.951156 | 0.360173 | 0.684983 |
| Si | Si293 | 0.593733 | 0.862248 | 0.180383 |
| Si | Si294 | 0.207176 | 0.824332 | 0.179943 |

|    |       |          |          |          |
|----|-------|----------|----------|----------|
| Si | Si295 | 0.329976 | 0.327416 | 0.695630 |
| Si | Si296 | 0.208212 | 0.669571 | 0.191577 |
| Si | Si297 | 0.328469 | 0.172073 | 0.698310 |
| Si | Si298 | 0.830939 | 0.154449 | 0.811912 |
| Si | Si299 | 0.826367 | 0.309308 | 0.797339 |
| Si | Si300 | 0.715745 | 0.810869 | 0.295881 |
| Zn | Zn301 | 0.400463 | 0.743506 | 0.397930 |

**C<sub>6</sub>H<sub>12</sub>-Phys.Ads-Zn<sup>2+</sup> (Fig. 9a/M1 in Black)** Total energy = -1951.88807087 eV

data\_

\_audit\_creation\_method 'Materials Studio'

\_cell\_length\_a 20.357621

\_cell\_length\_b 20.050598

\_cell\_length\_c 13.476578

\_cell\_angle\_alpha 90.000000

\_cell\_angle\_beta 90.000000

\_cell\_angle\_gamma 90.000000

\_symmetry\_space\_group\_name\_H-M 'P1'

loop\_

\_atom\_site\_type\_symbol

\_atom\_site\_label

\_atom\_site\_fract\_x

\_atom\_site\_fract\_y

\_atom\_site\_fract\_z

|   |     |          |          |          |
|---|-----|----------|----------|----------|
| H | H1  | 0.433838 | 0.775923 | 0.655729 |
| H | H2  | 0.509410 | 0.817863 | 0.662741 |
| H | H3  | 0.464873 | 0.729566 | 0.491596 |
| H | H4  | 0.470155 | 0.820622 | 0.490032 |
| H | H5  | 0.590480 | 0.811908 | 0.506972 |
| H | H6  | 0.565191 | 0.765194 | 0.403090 |
| H | H7  | 0.647119 | 0.702879 | 0.508124 |
| H | H8  | 0.571999 | 0.660047 | 0.499259 |
| H | H9  | 0.618166 | 0.746280 | 0.673933 |
| H | H10 | 0.611768 | 0.658839 | 0.672123 |
| H | H11 | 0.515289 | 0.712140 | 0.758481 |
| H | H12 | 0.490509 | 0.665966 | 0.654064 |
| C | C13 | 0.485443 | 0.772905 | 0.633522 |
| C | C14 | 0.492088 | 0.774893 | 0.519973 |
| C | C15 | 0.563231 | 0.767108 | 0.484374 |
| C | C16 | 0.595465 | 0.705134 | 0.529720 |
| C | C17 | 0.589684 | 0.704508 | 0.643154 |
| C | C18 | 0.518056 | 0.710553 | 0.677273 |
| O | O19 | 0.513070 | 0.028092 | 0.212389 |

|   |     |          |          |          |
|---|-----|----------|----------|----------|
| 0 | 020 | 0.019741 | 0.539141 | 0.717301 |
| 0 | 021 | 0.524671 | 0.438114 | 0.214866 |
| 0 | 022 | 0.010019 | 0.936002 | 0.698948 |
| 0 | 023 | 0.516460 | 0.933571 | 0.793162 |
| 0 | 024 | 0.017532 | 0.455198 | 0.291734 |
| 0 | 025 | 0.516190 | 0.548445 | 0.803992 |
| 0 | 026 | 0.019609 | 0.038310 | 0.286355 |
| 0 | 027 | 0.394607 | 0.061842 | 0.277427 |
| 0 | 028 | 0.139014 | 0.552106 | 0.785266 |
| 0 | 029 | 0.400995 | 0.424601 | 0.273564 |
| 0 | 030 | 0.129487 | 0.954252 | 0.768914 |
| 0 | 031 | 0.630644 | 0.942375 | 0.707592 |
| 0 | 032 | 0.899728 | 0.427897 | 0.219386 |
| 0 | 033 | 0.634257 | 0.529540 | 0.733981 |
| 0 | 034 | 0.893957 | 0.054476 | 0.238794 |
| 0 | 035 | 0.440854 | 0.114160 | 0.110763 |
| 0 | 036 | 0.102938 | 0.620179 | 0.624989 |
| 0 | 037 | 0.445000 | 0.361624 | 0.113222 |
| 0 | 038 | 0.107286 | 0.863826 | 0.628549 |
| 0 | 039 | 0.615326 | 0.858871 | 0.856509 |
| 0 | 040 | 0.940291 | 0.369743 | 0.384509 |
| 0 | 041 | 0.613733 | 0.616217 | 0.880940 |
| 0 | 042 | 0.945511 | 0.118716 | 0.392563 |
| 0 | 043 | 0.405545 | 0.986772 | 0.117041 |
| 0 | 044 | 0.120657 | 0.489535 | 0.615191 |
| 0 | 045 | 0.431148 | 0.492764 | 0.108095 |
| 0 | 046 | 0.099622 | 0.992724 | 0.584748 |
| 0 | 047 | 0.617559 | 0.989293 | 0.890759 |
| 0 | 048 | 0.908653 | 0.499172 | 0.381621 |
| 0 | 049 | 0.603221 | 0.486128 | 0.915529 |
| 0 | 050 | 0.928803 | 0.987481 | 0.402291 |
| 0 | 051 | 0.332484 | 0.061583 | 0.448983 |
| 0 | 052 | 0.204503 | 0.536188 | 0.949343 |
| 0 | 053 | 0.340283 | 0.428453 | 0.447633 |
| 0 | 054 | 0.197850 | 0.943395 | 0.932566 |
| 0 | 055 | 0.702301 | 0.921104 | 0.550925 |
| 0 | 056 | 0.835813 | 0.427420 | 0.051234 |
| 0 | 057 | 0.699600 | 0.548937 | 0.568583 |
| 0 | 058 | 0.832933 | 0.046323 | 0.065547 |
| 0 | 059 | 0.350942 | 0.947381 | 0.352931 |
| 0 | 060 | 0.205948 | 0.439750 | 0.812806 |
| 0 | 061 | 0.349340 | 0.537943 | 0.338279 |
| 0 | 062 | 0.217810 | 0.047503 | 0.812879 |
| 0 | 063 | 0.703492 | 0.040607 | 0.635373 |

|   |      |          |          |          |
|---|------|----------|----------|----------|
| 0 | 064  | 0.855650 | 0.542265 | 0.144090 |
| 0 | 065  | 0.720727 | 0.438560 | 0.674211 |
| 0 | 066  | 0.850930 | 0.938004 | 0.175434 |
| 0 | 067  | 0.265878 | 0.037707 | 0.285266 |
| 0 | 068  | 0.269033 | 0.552434 | 0.780475 |
| 0 | 069  | 0.271241 | 0.437962 | 0.284295 |
| 0 | 070  | 0.257727 | 0.929434 | 0.757520 |
| 0 | 071  | 0.761374 | 0.939121 | 0.723435 |
| 0 | 072  | 0.770897 | 0.455471 | 0.216777 |
| 0 | 073  | 0.761504 | 0.554867 | 0.742126 |
| 0 | 074  | 0.765315 | 0.030392 | 0.230196 |
| 0 | 075  | 0.298562 | 0.130011 | 0.607250 |
| 0 | 076  | 0.218705 | 0.621458 | 0.095422 |
| 0 | 077  | 0.306087 | 0.361342 | 0.606529 |
| 0 | 078  | 0.207357 | 0.866049 | 0.088031 |
| 0 | 079  | 0.718246 | 0.859888 | 0.382309 |
| 0 | 080  | 0.808501 | 0.355627 | 0.892603 |
| 0 | 081  | 0.725690 | 0.623765 | 0.412636 |
| 0 | 082  | 0.808777 | 0.115442 | 0.905027 |
| 0 | 083  | 0.216850 | 0.038329 | 0.534691 |
| 0 | 084  | 0.316424 | 0.538459 | 0.048644 |
| 0 | 085  | 0.216970 | 0.433760 | 0.512159 |
| 0 | 086  | 0.314910 | 0.923777 | 0.010396 |
| 0 | 087  | 0.811026 | 0.943500 | 0.446647 |
| 0 | 088  | 0.721356 | 0.443320 | 0.961304 |
| 0 | 089  | 0.820898 | 0.553673 | 0.501928 |
| 0 | 090  | 0.711648 | 0.050034 | 0.993571 |
| 0 | 091  | 0.326116 | 0.001830 | 0.625354 |
| 0 | 092  | 0.208625 | 0.490874 | 0.131061 |
| 0 | 093  | 0.310547 | 0.493589 | 0.613843 |
| 0 | 094  | 0.228603 | 0.997240 | 0.105825 |
| 0 | 095  | 0.697176 | 0.991752 | 0.386063 |
| 0 | 096  | 0.830598 | 0.484410 | 0.873616 |
| 0 | 097  | 0.729671 | 0.492312 | 0.396347 |
| 0 | 098  | 0.803126 | 0.983557 | 0.898103 |
| 0 | 099  | 0.125445 | 0.123025 | 0.595925 |
| 0 | 0100 | 0.408369 | 0.622422 | 0.111310 |
| 0 | 0101 | 0.127130 | 0.357738 | 0.599427 |
| 0 | 0102 | 0.406760 | 0.855069 | 0.103702 |
| 0 | 0103 | 0.904406 | 0.856775 | 0.400755 |
| 0 | 0104 | 0.630692 | 0.356115 | 0.905090 |
| 0 | 0105 | 0.912558 | 0.629254 | 0.420144 |
| 0 | 0106 | 0.620188 | 0.121573 | 0.901759 |
| 0 | 0107 | 0.111772 | 0.064154 | 0.422048 |

|   |      |          |          |          |
|---|------|----------|----------|----------|
| 0 | 0108 | 0.422561 | 0.561455 | 0.939738 |
| 0 | 0109 | 0.094395 | 0.431445 | 0.444965 |
| 0 | 0110 | 0.438011 | 0.926312 | 0.947676 |
| 0 | 0111 | 0.911025 | 0.921775 | 0.570356 |
| 0 | 0112 | 0.618648 | 0.415956 | 0.078941 |
| 0 | 0113 | 0.944868 | 0.542973 | 0.559218 |
| 0 | 0114 | 0.590152 | 0.049877 | 0.059950 |
| 0 | 0115 | 0.141538 | 0.047495 | 0.231072 |
| 0 | 0116 | 0.395518 | 0.534346 | 0.749084 |
| 0 | 0117 | 0.142093 | 0.421640 | 0.262683 |
| 0 | 0118 | 0.388483 | 0.935641 | 0.765672 |
| 0 | 0119 | 0.889085 | 0.950975 | 0.759638 |
| 0 | 0120 | 0.646909 | 0.439164 | 0.268738 |
| 0 | 0121 | 0.892127 | 0.557187 | 0.738717 |
| 0 | 0122 | 0.638312 | 0.060948 | 0.243918 |
| 0 | 0123 | 0.106141 | 0.944398 | 0.341797 |
| 0 | 0124 | 0.448448 | 0.442750 | 0.866938 |
| 0 | 0125 | 0.113683 | 0.540463 | 0.336203 |
| 0 | 0126 | 0.448330 | 0.039338 | 0.850994 |
| 0 | 0127 | 0.940561 | 0.041129 | 0.639065 |
| 0 | 0128 | 0.603227 | 0.536495 | 0.152906 |
| 0 | 0129 | 0.935437 | 0.439886 | 0.679945 |
| 0 | 0130 | 0.610948 | 0.942647 | 0.172479 |
| 0 | 0131 | 0.228755 | 0.125800 | 0.148833 |
| 0 | 0132 | 0.331382 | 0.622038 | 0.642926 |
| 0 | 0133 | 0.223761 | 0.358191 | 0.147449 |
| 0 | 0134 | 0.330306 | 0.869733 | 0.623502 |
| 0 | 0135 | 0.819120 | 0.858235 | 0.849464 |
| 0 | 0136 | 0.737819 | 0.365007 | 0.351211 |
| 0 | 0137 | 0.828461 | 0.616710 | 0.881172 |
| 0 | 0138 | 0.723083 | 0.121475 | 0.358592 |
| 0 | 0139 | 0.519711 | 0.851866 | 0.205347 |
| 0 | 0140 | 0.025313 | 0.348304 | 0.723814 |
| 0 | 0141 | 0.520448 | 0.629936 | 0.216343 |
| 0 | 0142 | 0.021587 | 0.132037 | 0.715643 |
| 0 | 0143 | 0.519715 | 0.139035 | 0.776831 |
| 0 | 0144 | 0.018728 | 0.628206 | 0.305027 |
| 0 | 0145 | 0.525002 | 0.348381 | 0.788804 |
| 0 | 0146 | 0.015606 | 0.854956 | 0.296331 |
| 0 | 0147 | 0.407075 | 0.818178 | 0.291747 |
| 0 | 0148 | 0.145243 | 0.324388 | 0.788593 |
| 0 | 0149 | 0.406639 | 0.666843 | 0.296482 |
| 0 | 0150 | 0.139009 | 0.151564 | 0.788727 |
| 0 | 0151 | 0.640262 | 0.145266 | 0.709922 |



|   |      |          |          |          |
|---|------|----------|----------|----------|
| 0 | 0152 | 0.903299 | 0.652453 | 0.227500 |
| 0 | 0153 | 0.642078 | 0.335427 | 0.709947 |
| 0 | 0154 | 0.903233 | 0.820580 | 0.211148 |
| 0 | 0155 | 0.460484 | 0.739726 | 0.154116 |
| 0 | 0156 | 0.089288 | 0.240089 | 0.662890 |
| 0 | 0157 | 0.596855 | 0.240627 | 0.829792 |
| 0 | 0158 | 0.956941 | 0.742078 | 0.347395 |
| 0 | 0159 | 0.332334 | 0.816030 | 0.444441 |
| 0 | 0160 | 0.208094 | 0.347305 | 0.955471 |
| 0 | 0161 | 0.336449 | 0.664316 | 0.455710 |
| 0 | 0162 | 0.204421 | 0.138647 | 0.956031 |
| 0 | 0163 | 0.710078 | 0.157188 | 0.547910 |
| 0 | 0164 | 0.836296 | 0.661576 | 0.065573 |
| 0 | 0165 | 0.707737 | 0.340496 | 0.541282 |
| 0 | 0166 | 0.840821 | 0.840022 | 0.041597 |
| 0 | 0167 | 0.268413 | 0.847513 | 0.259415 |
| 0 | 0168 | 0.276458 | 0.329748 | 0.792635 |
| 0 | 0169 | 0.266178 | 0.648629 | 0.275282 |
| 0 | 0170 | 0.269447 | 0.166894 | 0.791814 |
| 0 | 0171 | 0.770883 | 0.137825 | 0.719204 |
| 0 | 0172 | 0.774494 | 0.626783 | 0.231088 |
| 0 | 0173 | 0.772610 | 0.320996 | 0.708654 |
| 0 | 0174 | 0.772678 | 0.834841 | 0.206643 |
| 0 | 0175 | 0.296348 | 0.744405 | 0.598760 |
| 0 | 0176 | 0.244194 | 0.242013 | 0.063530 |
| 0 | 0177 | 0.747900 | 0.244708 | 0.415464 |
| 0 | 0178 | 0.800250 | 0.741162 | 0.921519 |
| 0 | 0179 | 0.217651 | 0.841837 | 0.529701 |
| 0 | 0180 | 0.328211 | 0.341122 | 0.031584 |
| 0 | 0181 | 0.220163 | 0.641841 | 0.543164 |
| 0 | 0182 | 0.326698 | 0.141733 | 0.021947 |
| 0 | 0183 | 0.828681 | 0.146483 | 0.467127 |
| 0 | 0184 | 0.720007 | 0.644883 | 0.983916 |
| 0 | 0185 | 0.830897 | 0.338378 | 0.483106 |
| 0 | 0186 | 0.718524 | 0.838393 | 0.974990 |
| 0 | 0187 | 0.136636 | 0.742110 | 0.575407 |
| 0 | 0188 | 0.408351 | 0.239052 | 0.074997 |
| 0 | 0189 | 0.915218 | 0.244418 | 0.427293 |
| 0 | 0190 | 0.635019 | 0.740366 | 0.929855 |
| 0 | 0191 | 0.102922 | 0.829781 | 0.437191 |
| 0 | 0192 | 0.435966 | 0.318988 | 0.925975 |
| 0 | 0193 | 0.112225 | 0.654347 | 0.434847 |
| 0 | 0194 | 0.438195 | 0.159800 | 0.925561 |
| 0 | 0195 | 0.933902 | 0.164943 | 0.578642 |

|    |       |          |          |          |
|----|-------|----------|----------|----------|
| O  | O196  | 0.604143 | 0.655428 | 0.071115 |
| O  | O197  | 0.946213 | 0.329926 | 0.571412 |
| O  | O198  | 0.597764 | 0.840034 | 0.048876 |
| O  | O199  | 0.138710 | 0.832188 | 0.247296 |
| O  | O200  | 0.400076 | 0.353581 | 0.741821 |
| O  | O201  | 0.137857 | 0.654696 | 0.241556 |
| O  | O202  | 0.392170 | 0.132938 | 0.743601 |
| O  | O203  | 0.897043 | 0.134445 | 0.763500 |
| O  | O204  | 0.646197 | 0.640266 | 0.257996 |
| O  | O205  | 0.899420 | 0.325263 | 0.756437 |
| O  | O206  | 0.644529 | 0.820600 | 0.230538 |
| O  | O207  | 0.216273 | 0.744609 | 0.159958 |
| O  | O208  | 0.340510 | 0.244955 | 0.676856 |
| O  | O209  | 0.822523 | 0.233275 | 0.832152 |
| O  | O210  | 0.726288 | 0.736781 | 0.317015 |
| Al | Al211 | 0.335235 | 0.864872 | 0.331936 |
| Al | Al212 | 0.334255 | 0.621396 | 0.338129 |
| Si | Si213 | 0.718247 | 0.657012 | 0.303415 |
| Si | Si214 | 0.438547 | 0.047757 | 0.179503 |
| Si | Si215 | 0.095582 | 0.550289 | 0.684726 |
| Si | Si216 | 0.449194 | 0.429464 | 0.178379 |
| Si | Si217 | 0.087294 | 0.936866 | 0.670225 |
| Si | Si218 | 0.594823 | 0.931581 | 0.813546 |
| Si | Si219 | 0.942196 | 0.437923 | 0.320261 |
| Si | Si220 | 0.592906 | 0.544900 | 0.834200 |
| Si | Si221 | 0.946325 | 0.049664 | 0.329668 |
| Si | Si222 | 0.336146 | 0.025485 | 0.340741 |
| Si | Si223 | 0.204753 | 0.519719 | 0.832766 |
| Si | Si224 | 0.340619 | 0.458682 | 0.335198 |
| Si | Si225 | 0.200579 | 0.968431 | 0.818904 |
| Si | Si226 | 0.699751 | 0.961137 | 0.655215 |
| Si | Si227 | 0.840415 | 0.463300 | 0.158668 |
| Si | Si228 | 0.704194 | 0.517675 | 0.679543 |
| Si | Si229 | 0.835739 | 0.017427 | 0.177762 |
| Si | Si230 | 0.293518 | 0.057861 | 0.553268 |
| Si | Si231 | 0.237187 | 0.547535 | 0.057180 |
| Si | Si232 | 0.293842 | 0.429400 | 0.544932 |
| Si | Si233 | 0.236943 | 0.932088 | 0.036064 |
| Si | Si234 | 0.732664 | 0.928991 | 0.440434 |
| Si | Si235 | 0.799007 | 0.427613 | 0.944772 |
| Si | Si236 | 0.744035 | 0.554727 | 0.468923 |
| Si | Si237 | 0.789267 | 0.048911 | 0.965240 |
| Si | Si238 | 0.138744 | 0.054815 | 0.534378 |
| Si | Si239 | 0.394249 | 0.553249 | 0.051814 |

|    |       |          |          |          |
|----|-------|----------|----------|----------|
| Si | Si240 | 0.140181 | 0.428007 | 0.543262 |
| Si | Si241 | 0.390960 | 0.923902 | 0.044758 |
| Si | Si242 | 0.888947 | 0.927303 | 0.454950 |
| Si | Si243 | 0.643715 | 0.424915 | 0.965439 |
| Si | Si244 | 0.896893 | 0.556075 | 0.465571 |
| Si | Si245 | 0.635035 | 0.052827 | 0.960785 |
| Si | Si246 | 0.094640 | 0.023312 | 0.320655 |
| Si | Si247 | 0.445130 | 0.521654 | 0.840277 |
| Si | Si248 | 0.092027 | 0.462401 | 0.333360 |
| Si | Si249 | 0.447019 | 0.959106 | 0.838328 |
| Si | Si250 | 0.937959 | 0.962281 | 0.666676 |
| Si | Si251 | 0.597936 | 0.457279 | 0.178397 |
| Si | Si252 | 0.948043 | 0.519571 | 0.674603 |
| Si | Si253 | 0.587851 | 0.020616 | 0.172587 |
| Si | Si254 | 0.216885 | 0.051426 | 0.193146 |
| Si | Si255 | 0.326011 | 0.549655 | 0.696639 |
| Si | Si256 | 0.212177 | 0.427698 | 0.206134 |
| Si | Si257 | 0.325131 | 0.935371 | 0.693512 |
| Si | Si258 | 0.818326 | 0.933628 | 0.806725 |
| Si | Si259 | 0.721834 | 0.438354 | 0.307969 |
| Si | Si260 | 0.827926 | 0.552595 | 0.808862 |
| Si | Si261 | 0.706458 | 0.051283 | 0.304898 |
| Si | Si262 | 0.448885 | 0.816588 | 0.187662 |
| Si | Si263 | 0.096664 | 0.317752 | 0.693611 |
| Si | Si264 | 0.449616 | 0.663972 | 0.193257 |
| Si | Si265 | 0.093972 | 0.161705 | 0.690576 |
| Si | Si266 | 0.594076 | 0.161834 | 0.804652 |
| Si | Si267 | 0.948497 | 0.663319 | 0.324847 |
| Si | Si268 | 0.598480 | 0.319966 | 0.808395 |
| Si | Si269 | 0.945526 | 0.818700 | 0.313732 |
| Si | Si270 | 0.208792 | 0.360563 | 0.837157 |
| Si | Si271 | 0.207264 | 0.126071 | 0.837351 |
| Si | Si272 | 0.706145 | 0.120268 | 0.654325 |
| Si | Si273 | 0.842394 | 0.620326 | 0.168150 |
| Si | Si274 | 0.710324 | 0.358897 | 0.658679 |
| Si | Si275 | 0.842022 | 0.858488 | 0.158687 |
| Si | Si276 | 0.292879 | 0.818671 | 0.550427 |
| Si | Si277 | 0.251240 | 0.321615 | 0.049397 |
| Si | Si278 | 0.295244 | 0.667433 | 0.560233 |
| Si | Si279 | 0.250998 | 0.162561 | 0.047551 |
| Si | Si280 | 0.752417 | 0.167049 | 0.447025 |
| Si | Si281 | 0.796157 | 0.665617 | 0.962289 |
| Si | Si282 | 0.755833 | 0.321879 | 0.448611 |
| Si | Si283 | 0.794742 | 0.819519 | 0.948059 |

|    |       |          |          |          |
|----|-------|----------|----------|----------|
| Si | Si284 | 0.140565 | 0.819591 | 0.541826 |
| Si | Si285 | 0.404179 | 0.315636 | 0.036663 |
| Si | Si286 | 0.142698 | 0.664270 | 0.544318 |
| Si | Si287 | 0.403490 | 0.163165 | 0.033902 |
| Si | Si288 | 0.905872 | 0.168252 | 0.465844 |
| Si | Si289 | 0.643133 | 0.663872 | 0.966644 |
| Si | Si290 | 0.908339 | 0.320776 | 0.466498 |
| Si | Si291 | 0.641933 | 0.819330 | 0.953275 |
| Si | Si292 | 0.091618 | 0.865239 | 0.329782 |
| Si | Si293 | 0.452265 | 0.365630 | 0.830710 |
| Si | Si294 | 0.096293 | 0.619482 | 0.328846 |
| Si | Si295 | 0.449219 | 0.118028 | 0.823917 |
| Si | Si296 | 0.948090 | 0.118124 | 0.674593 |
| Si | Si297 | 0.594134 | 0.615280 | 0.174846 |
| Si | Si298 | 0.951444 | 0.360824 | 0.682559 |
| Si | Si299 | 0.593644 | 0.863911 | 0.163947 |
| Si | Si300 | 0.209075 | 0.822620 | 0.190675 |
| Si | Si301 | 0.330633 | 0.322663 | 0.704707 |
| Si | Si302 | 0.211053 | 0.667323 | 0.194992 |
| Si | Si303 | 0.325207 | 0.168279 | 0.705125 |
| Si | Si304 | 0.824904 | 0.155202 | 0.803884 |
| Si | Si305 | 0.826024 | 0.310052 | 0.797012 |
| Si | Si306 | 0.715753 | 0.813608 | 0.284026 |
| Zn | Zn307 | 0.393581 | 0.742553 | 0.395167 |

**TS-C<sub>6</sub>H<sub>12</sub>-Dehydro-Zn<sup>2+</sup> (Fig. 9a/TS1 in Black)** Total energy = -1949.71316019 eV

data\_

\_audit\_creation\_method 'Materials Studio'

\_cell\_length\_a 20.357621

\_cell\_length\_b 20.050598

\_cell\_length\_c 13.476578

\_cell\_angle\_alpha 90.000000

\_cell\_angle\_beta 90.000000

\_cell\_angle\_gamma 90.000000

\_symmetry\_space\_group\_name\_H-M 'P1'

loop\_

\_atom\_site\_type\_symbol

\_atom\_site\_label

\_atom\_site\_fract\_x

\_atom\_site\_fract\_y

\_atom\_site\_fract\_z

|   |    |          |          |          |
|---|----|----------|----------|----------|
| H | H1 | 0.428146 | 0.747380 | 0.644639 |
| H | H2 | 0.513604 | 0.758615 | 0.640570 |

|   |     |          |          |          |
|---|-----|----------|----------|----------|
| H | H3  | 0.401618 | 0.690659 | 0.482149 |
| H | H4  | 0.479520 | 0.792566 | 0.489196 |
| H | H5  | 0.578413 | 0.729961 | 0.479323 |
| H | H6  | 0.536030 | 0.710877 | 0.369786 |
| H | H7  | 0.581461 | 0.607628 | 0.442210 |
| H | H8  | 0.495428 | 0.603780 | 0.451313 |
| H | H9  | 0.589835 | 0.647523 | 0.616214 |
| H | H10 | 0.547540 | 0.570999 | 0.611692 |
| H | H11 | 0.490446 | 0.653982 | 0.722918 |
| H | H12 | 0.441761 | 0.625464 | 0.624485 |
| C | C13 | 0.473202 | 0.727951 | 0.610967 |
| C | C14 | 0.473419 | 0.737615 | 0.497092 |
| C | C15 | 0.534434 | 0.704416 | 0.450371 |
| C | C16 | 0.539089 | 0.630593 | 0.478281 |
| C | C17 | 0.544179 | 0.623624 | 0.591066 |
| C | C18 | 0.484827 | 0.655549 | 0.642207 |
| O | O19 | 0.509299 | 0.024127 | 0.211068 |
| O | O20 | 0.025683 | 0.538182 | 0.717514 |
| O | O21 | 0.524637 | 0.438497 | 0.218782 |
| O | O22 | 0.008903 | 0.935534 | 0.695270 |
| O | O23 | 0.514931 | 0.942777 | 0.788631 |
| O | O24 | 0.016188 | 0.457041 | 0.300872 |
| O | O25 | 0.515876 | 0.534504 | 0.804583 |
| O | O26 | 0.018435 | 0.039862 | 0.287312 |
| O | O27 | 0.391504 | 0.064241 | 0.274205 |
| O | O28 | 0.143010 | 0.559991 | 0.789331 |
| O | O29 | 0.399124 | 0.432444 | 0.269068 |
| O | O30 | 0.129346 | 0.955597 | 0.759132 |
| O | O31 | 0.630980 | 0.943303 | 0.707922 |
| O | O32 | 0.897160 | 0.433267 | 0.232770 |
| O | O33 | 0.640987 | 0.528643 | 0.756603 |
| O | O34 | 0.893318 | 0.050690 | 0.234225 |
| O | O35 | 0.440144 | 0.107999 | 0.102309 |
| O | O36 | 0.108802 | 0.619520 | 0.623182 |
| O | O37 | 0.444686 | 0.356481 | 0.125530 |
| O | O38 | 0.105295 | 0.865841 | 0.617421 |
| O | O39 | 0.607123 | 0.859342 | 0.854606 |
| O | O40 | 0.939750 | 0.372273 | 0.395437 |
| O | O41 | 0.598542 | 0.614921 | 0.893383 |
| O | O42 | 0.940609 | 0.121217 | 0.385916 |
| O | O43 | 0.398826 | 0.983005 | 0.122170 |
| O | O44 | 0.130872 | 0.489104 | 0.624790 |
| O | O45 | 0.436958 | 0.487644 | 0.096607 |
| O | O46 | 0.095176 | 0.995544 | 0.578380 |

|   |     |          |          |          |
|---|-----|----------|----------|----------|
| 0 | 047 | 0.618305 | 0.988457 | 0.891256 |
| 0 | 048 | 0.909356 | 0.501521 | 0.397699 |
| 0 | 049 | 0.599977 | 0.484551 | 0.932418 |
| 0 | 050 | 0.927486 | 0.989809 | 0.403321 |
| 0 | 051 | 0.327181 | 0.065399 | 0.443528 |
| 0 | 052 | 0.207406 | 0.555873 | 0.956756 |
| 0 | 053 | 0.341085 | 0.438458 | 0.441999 |
| 0 | 054 | 0.196912 | 0.939977 | 0.921892 |
| 0 | 055 | 0.699857 | 0.928457 | 0.548130 |
| 0 | 056 | 0.830006 | 0.425654 | 0.068152 |
| 0 | 057 | 0.702731 | 0.551366 | 0.589250 |
| 0 | 058 | 0.831268 | 0.038994 | 0.061676 |
| 0 | 059 | 0.351754 | 0.949397 | 0.354732 |
| 0 | 060 | 0.189934 | 0.444125 | 0.850969 |
| 0 | 061 | 0.344297 | 0.545585 | 0.327667 |
| 0 | 062 | 0.217401 | 0.047629 | 0.812760 |
| 0 | 063 | 0.711595 | 0.041006 | 0.654302 |
| 0 | 064 | 0.847216 | 0.544054 | 0.151304 |
| 0 | 065 | 0.727920 | 0.440151 | 0.689245 |
| 0 | 066 | 0.835607 | 0.936920 | 0.187299 |
| 0 | 067 | 0.263734 | 0.032395 | 0.279184 |
| 0 | 068 | 0.271557 | 0.537219 | 0.788821 |
| 0 | 069 | 0.269116 | 0.441830 | 0.280126 |
| 0 | 070 | 0.257040 | 0.931348 | 0.745607 |
| 0 | 071 | 0.761636 | 0.928671 | 0.719020 |
| 0 | 072 | 0.768000 | 0.457161 | 0.235094 |
| 0 | 073 | 0.768786 | 0.555801 | 0.758581 |
| 0 | 074 | 0.762733 | 0.042974 | 0.226826 |
| 0 | 075 | 0.295578 | 0.133077 | 0.603639 |
| 0 | 076 | 0.234542 | 0.620884 | 0.121527 |
| 0 | 077 | 0.325290 | 0.378148 | 0.609938 |
| 0 | 078 | 0.205371 | 0.862298 | 0.075170 |
| 0 | 079 | 0.714484 | 0.864238 | 0.380860 |
| 0 | 080 | 0.809097 | 0.354624 | 0.906646 |
| 0 | 081 | 0.714760 | 0.624222 | 0.429690 |
| 0 | 082 | 0.810352 | 0.114443 | 0.905602 |
| 0 | 083 | 0.215450 | 0.037694 | 0.537996 |
| 0 | 084 | 0.317928 | 0.530146 | 0.053586 |
| 0 | 085 | 0.220778 | 0.428712 | 0.515077 |
| 0 | 086 | 0.313408 | 0.922698 | 0.001543 |
| 0 | 087 | 0.809687 | 0.944987 | 0.444633 |
| 0 | 088 | 0.720987 | 0.444526 | 0.964073 |
| 0 | 089 | 0.820417 | 0.563532 | 0.509229 |
| 0 | 090 | 0.710027 | 0.053123 | 0.992109 |

|   |      |          |          |          |
|---|------|----------|----------|----------|
| 0 | 091  | 0.328834 | 0.006667 | 0.621849 |
| 0 | 092  | 0.203898 | 0.490593 | 0.125678 |
| 0 | 093  | 0.306295 | 0.508482 | 0.601444 |
| 0 | 094  | 0.225399 | 0.993461 | 0.097615 |
| 0 | 095  | 0.697814 | 0.996204 | 0.382365 |
| 0 | 096  | 0.835395 | 0.483021 | 0.890347 |
| 0 | 097  | 0.730260 | 0.492808 | 0.417319 |
| 0 | 098  | 0.796498 | 0.983503 | 0.890271 |
| 0 | 099  | 0.124424 | 0.125144 | 0.591331 |
| 0 | 0100 | 0.409210 | 0.617522 | 0.107358 |
| 0 | 0101 | 0.125634 | 0.358301 | 0.597310 |
| 0 | 0102 | 0.412632 | 0.855910 | 0.078650 |
| 0 | 0103 | 0.903471 | 0.858825 | 0.398569 |
| 0 | 0104 | 0.628273 | 0.354883 | 0.922902 |
| 0 | 0105 | 0.914063 | 0.632871 | 0.421483 |
| 0 | 0106 | 0.613174 | 0.120672 | 0.904874 |
| 0 | 0107 | 0.114840 | 0.066051 | 0.416584 |
| 0 | 0108 | 0.418285 | 0.557680 | 0.933036 |
| 0 | 0109 | 0.098147 | 0.439017 | 0.449281 |
| 0 | 0110 | 0.435013 | 0.946497 | 0.940945 |
| 0 | 0111 | 0.908624 | 0.921899 | 0.569318 |
| 0 | 0112 | 0.626097 | 0.417582 | 0.095888 |
| 0 | 0113 | 0.943162 | 0.554775 | 0.571145 |
| 0 | 0114 | 0.588359 | 0.046512 | 0.060603 |
| 0 | 0115 | 0.139017 | 0.040743 | 0.225439 |
| 0 | 0116 | 0.395668 | 0.534594 | 0.740409 |
| 0 | 0117 | 0.140252 | 0.422406 | 0.263414 |
| 0 | 0118 | 0.387520 | 0.932082 | 0.757943 |
| 0 | 0119 | 0.888037 | 0.951868 | 0.758851 |
| 0 | 0120 | 0.643199 | 0.452844 | 0.285425 |
| 0 | 0121 | 0.899864 | 0.554696 | 0.757772 |
| 0 | 0122 | 0.633433 | 0.061856 | 0.243954 |
| 0 | 0123 | 0.102687 | 0.944132 | 0.346825 |
| 0 | 0124 | 0.435132 | 0.436989 | 0.859241 |
| 0 | 0125 | 0.113650 | 0.542983 | 0.330065 |
| 0 | 0126 | 0.436373 | 0.047651 | 0.815542 |
| 0 | 0127 | 0.939604 | 0.040874 | 0.636863 |
| 0 | 0128 | 0.598919 | 0.539831 | 0.153323 |
| 0 | 0129 | 0.938853 | 0.442596 | 0.672136 |
| 0 | 0130 | 0.609480 | 0.941000 | 0.176313 |
| 0 | 0131 | 0.225356 | 0.120769 | 0.146061 |
| 0 | 0132 | 0.319072 | 0.629755 | 0.666169 |
| 0 | 0133 | 0.221575 | 0.358931 | 0.145935 |
| 0 | 0134 | 0.330073 | 0.874886 | 0.607115 |

|   |      |          |          |          |
|---|------|----------|----------|----------|
| 0 | 0135 | 0.822981 | 0.857210 | 0.851862 |
| 0 | 0136 | 0.726139 | 0.367078 | 0.364421 |
| 0 | 0137 | 0.835974 | 0.615382 | 0.900150 |
| 0 | 0138 | 0.714777 | 0.127382 | 0.359195 |
| 0 | 0139 | 0.517747 | 0.848535 | 0.198889 |
| 0 | 0140 | 0.025250 | 0.349372 | 0.723638 |
| 0 | 0141 | 0.518741 | 0.635770 | 0.213223 |
| 0 | 0142 | 0.020204 | 0.133420 | 0.709952 |
| 0 | 0143 | 0.517761 | 0.147253 | 0.773789 |
| 0 | 0144 | 0.018145 | 0.631089 | 0.301468 |
| 0 | 0145 | 0.525842 | 0.349251 | 0.799037 |
| 0 | 0146 | 0.013795 | 0.856624 | 0.291598 |
| 0 | 0147 | 0.401767 | 0.823928 | 0.271566 |
| 0 | 0148 | 0.146265 | 0.327385 | 0.786691 |
| 0 | 0149 | 0.403210 | 0.672406 | 0.289066 |
| 0 | 0150 | 0.137341 | 0.149869 | 0.785917 |
| 0 | 0151 | 0.639750 | 0.144323 | 0.715308 |
| 0 | 0152 | 0.900912 | 0.652866 | 0.227911 |
| 0 | 0153 | 0.644458 | 0.341939 | 0.727044 |
| 0 | 0154 | 0.900979 | 0.823924 | 0.208686 |
| 0 | 0155 | 0.454303 | 0.739519 | 0.140313 |
| 0 | 0156 | 0.089711 | 0.241350 | 0.663667 |
| 0 | 0157 | 0.599944 | 0.241641 | 0.836203 |
| 0 | 0158 | 0.955491 | 0.744417 | 0.343606 |
| 0 | 0159 | 0.328728 | 0.816609 | 0.429847 |
| 0 | 0160 | 0.210704 | 0.334657 | 0.954183 |
| 0 | 0161 | 0.350460 | 0.657696 | 0.475285 |
| 0 | 0162 | 0.202494 | 0.141168 | 0.954498 |
| 0 | 0163 | 0.707921 | 0.152582 | 0.551845 |
| 0 | 0164 | 0.818328 | 0.664286 | 0.081340 |
| 0 | 0165 | 0.707243 | 0.342574 | 0.556927 |
| 0 | 0166 | 0.833804 | 0.843759 | 0.044652 |
| 0 | 0167 | 0.264159 | 0.860233 | 0.248599 |
| 0 | 0168 | 0.275073 | 0.353690 | 0.786556 |
| 0 | 0169 | 0.262843 | 0.663637 | 0.304520 |
| 0 | 0170 | 0.267915 | 0.166889 | 0.791338 |
| 0 | 0171 | 0.770017 | 0.148649 | 0.724236 |
| 0 | 0172 | 0.773774 | 0.627120 | 0.256736 |
| 0 | 0173 | 0.774023 | 0.319996 | 0.721909 |
| 0 | 0174 | 0.770208 | 0.824456 | 0.211429 |
| 0 | 0175 | 0.297921 | 0.749095 | 0.592793 |
| 0 | 0176 | 0.244773 | 0.238743 | 0.075640 |
| 0 | 0177 | 0.742020 | 0.247122 | 0.427400 |
| 0 | 0178 | 0.800617 | 0.740566 | 0.926753 |



|    |       |          |          |          |
|----|-------|----------|----------|----------|
| O  | O179  | 0.216372 | 0.842645 | 0.521142 |
| O  | O180  | 0.329024 | 0.336997 | 0.038097 |
| O  | O181  | 0.223372 | 0.646252 | 0.533045 |
| O  | O182  | 0.324510 | 0.139224 | 0.021377 |
| O  | O183  | 0.824233 | 0.146884 | 0.462638 |
| O  | O184  | 0.715857 | 0.642379 | 0.964954 |
| O  | O185  | 0.827047 | 0.341782 | 0.484213 |
| O  | O186  | 0.715545 | 0.838348 | 0.963181 |
| O  | O187  | 0.137211 | 0.742893 | 0.573266 |
| O  | O188  | 0.408262 | 0.233978 | 0.079055 |
| O  | O189  | 0.909940 | 0.246321 | 0.428204 |
| O  | O190  | 0.630271 | 0.740285 | 0.925804 |
| O  | O191  | 0.102701 | 0.825014 | 0.428302 |
| O  | O192  | 0.440247 | 0.317553 | 0.938196 |
| O  | O193  | 0.110473 | 0.654166 | 0.434578 |
| O  | O194  | 0.433855 | 0.158982 | 0.921254 |
| O  | O195  | 0.930094 | 0.163620 | 0.574583 |
| O  | O196  | 0.610626 | 0.661066 | 0.078539 |
| O  | O197  | 0.939340 | 0.326142 | 0.579813 |
| O  | O198  | 0.598817 | 0.840352 | 0.047801 |
| O  | O199  | 0.135966 | 0.836923 | 0.237787 |
| O  | O200  | 0.401681 | 0.331533 | 0.751750 |
| O  | O201  | 0.138500 | 0.658437 | 0.242174 |
| O  | O202  | 0.392036 | 0.158297 | 0.733064 |
| O  | O203  | 0.896640 | 0.133702 | 0.761423 |
| O  | O204  | 0.643644 | 0.638769 | 0.265988 |
| O  | O205  | 0.900237 | 0.334811 | 0.768171 |
| O  | O206  | 0.641496 | 0.818322 | 0.231974 |
| O  | O207  | 0.219230 | 0.747329 | 0.165216 |
| O  | O208  | 0.313688 | 0.254609 | 0.665878 |
| O  | O209  | 0.831565 | 0.234478 | 0.841681 |
| O  | O210  | 0.718064 | 0.737209 | 0.333818 |
| Al | Al211 | 0.331846 | 0.869259 | 0.322027 |
| Al | Al212 | 0.335730 | 0.629179 | 0.344603 |
| Si | Si213 | 0.712632 | 0.657292 | 0.319791 |
| Si | Si214 | 0.435237 | 0.045231 | 0.177778 |
| Si | Si215 | 0.101546 | 0.551591 | 0.687500 |
| Si | Si216 | 0.450269 | 0.429052 | 0.178035 |
| Si | Si217 | 0.085460 | 0.938060 | 0.662353 |
| Si | Si218 | 0.592370 | 0.933691 | 0.811779 |
| Si | Si219 | 0.941088 | 0.441123 | 0.332603 |
| Si | Si220 | 0.589974 | 0.540719 | 0.846900 |
| Si | Si221 | 0.944227 | 0.050404 | 0.327338 |
| Si | Si222 | 0.333724 | 0.026427 | 0.337746 |

|    |       |          |          |          |
|----|-------|----------|----------|----------|
| Si | Si223 | 0.202995 | 0.523865 | 0.847114 |
| Si | Si224 | 0.338190 | 0.466108 | 0.328632 |
| Si | Si225 | 0.200228 | 0.968492 | 0.810197 |
| Si | Si226 | 0.701026 | 0.960959 | 0.657771 |
| Si | Si227 | 0.835672 | 0.465036 | 0.172716 |
| Si | Si228 | 0.709977 | 0.518838 | 0.698911 |
| Si | Si229 | 0.830881 | 0.017560 | 0.177712 |
| Si | Si230 | 0.291911 | 0.060594 | 0.550695 |
| Si | Si231 | 0.240644 | 0.550148 | 0.065789 |
| Si | Si232 | 0.298040 | 0.438103 | 0.542188 |
| Si | Si233 | 0.235104 | 0.929360 | 0.026038 |
| Si | Si234 | 0.731037 | 0.933122 | 0.438171 |
| Si | Si235 | 0.798982 | 0.426974 | 0.957549 |
| Si | Si236 | 0.742371 | 0.558100 | 0.485440 |
| Si | Si237 | 0.787265 | 0.047483 | 0.962224 |
| Si | Si238 | 0.137818 | 0.056363 | 0.530988 |
| Si | Si239 | 0.395327 | 0.548260 | 0.047974 |
| Si | Si240 | 0.143940 | 0.429051 | 0.546385 |
| Si | Si241 | 0.389323 | 0.927869 | 0.035230 |
| Si | Si242 | 0.887451 | 0.928845 | 0.453754 |
| Si | Si243 | 0.644195 | 0.424742 | 0.979020 |
| Si | Si244 | 0.896699 | 0.562627 | 0.474567 |
| Si | Si245 | 0.632880 | 0.052401 | 0.961583 |
| Si | Si246 | 0.093390 | 0.022578 | 0.319431 |
| Si | Si247 | 0.441141 | 0.515924 | 0.835167 |
| Si | Si248 | 0.092154 | 0.465060 | 0.335268 |
| Si | Si249 | 0.443185 | 0.967622 | 0.825248 |
| Si | Si250 | 0.936545 | 0.962263 | 0.665082 |
| Si | Si251 | 0.597822 | 0.461982 | 0.187961 |
| Si | Si252 | 0.951681 | 0.522234 | 0.680658 |
| Si | Si253 | 0.584854 | 0.018573 | 0.173567 |
| Si | Si254 | 0.214269 | 0.045822 | 0.187584 |
| Si | Si255 | 0.322719 | 0.551497 | 0.700126 |
| Si | Si256 | 0.209423 | 0.428766 | 0.203630 |
| Si | Si257 | 0.325291 | 0.937200 | 0.683453 |
| Si | Si258 | 0.817586 | 0.931167 | 0.804422 |
| Si | Si259 | 0.717409 | 0.442750 | 0.325259 |
| Si | Si260 | 0.834777 | 0.551653 | 0.826312 |
| Si | Si261 | 0.702755 | 0.057017 | 0.303080 |
| Si | Si262 | 0.446579 | 0.817523 | 0.170436 |
| Si | Si263 | 0.096669 | 0.319124 | 0.693289 |
| Si | Si264 | 0.446269 | 0.665032 | 0.186655 |
| Si | Si265 | 0.093101 | 0.162398 | 0.687500 |
| Si | Si266 | 0.592513 | 0.163664 | 0.807622 |

|    |       |          |          |          |
|----|-------|----------|----------|----------|
| Si | Si267 | 0.947662 | 0.665434 | 0.323420 |
| Si | Si268 | 0.599324 | 0.321583 | 0.821500 |
| Si | Si269 | 0.943726 | 0.820996 | 0.310598 |
| Si | Si270 | 0.205698 | 0.365058 | 0.843763 |
| Si | Si271 | 0.205672 | 0.126151 | 0.836333 |
| Si | Si272 | 0.707270 | 0.121448 | 0.662276 |
| Si | Si273 | 0.835111 | 0.621712 | 0.179859 |
| Si | Si274 | 0.713103 | 0.361178 | 0.673807 |
| Si | Si275 | 0.835322 | 0.857729 | 0.162776 |
| Si | Si276 | 0.292603 | 0.821466 | 0.537796 |
| Si | Si277 | 0.251754 | 0.317540 | 0.053789 |
| Si | Si278 | 0.295905 | 0.670178 | 0.568371 |
| Si | Si279 | 0.249146 | 0.160435 | 0.048553 |
| Si | Si280 | 0.747411 | 0.168242 | 0.450190 |
| Si | Si281 | 0.792692 | 0.665302 | 0.967702 |
| Si | Si282 | 0.750624 | 0.324290 | 0.459118 |
| Si | Si283 | 0.793003 | 0.819571 | 0.947732 |
| Si | Si284 | 0.139841 | 0.819526 | 0.534396 |
| Si | Si285 | 0.405080 | 0.311699 | 0.045770 |
| Si | Si286 | 0.144741 | 0.665399 | 0.540830 |
| Si | Si287 | 0.401615 | 0.159894 | 0.031194 |
| Si | Si288 | 0.901357 | 0.169030 | 0.462405 |
| Si | Si289 | 0.638927 | 0.664523 | 0.965835 |
| Si | Si290 | 0.904191 | 0.321695 | 0.471922 |
| Si | Si291 | 0.638346 | 0.819447 | 0.947994 |
| Si | Si292 | 0.089821 | 0.865570 | 0.325211 |
| Si | Si293 | 0.450813 | 0.359114 | 0.836655 |
| Si | Si294 | 0.095451 | 0.621815 | 0.326666 |
| Si | Si295 | 0.444479 | 0.127914 | 0.811266 |
| Si | Si296 | 0.946551 | 0.118060 | 0.670952 |
| Si | Si297 | 0.593240 | 0.618691 | 0.177854 |
| Si | Si298 | 0.950826 | 0.363155 | 0.685699 |
| Si | Si299 | 0.592586 | 0.862333 | 0.163168 |
| Si | Si300 | 0.207158 | 0.826427 | 0.183979 |
| Si | Si301 | 0.328491 | 0.329422 | 0.704532 |
| Si | Si302 | 0.214807 | 0.672437 | 0.210303 |
| Si | Si303 | 0.317955 | 0.177062 | 0.698348 |
| Si | Si304 | 0.827017 | 0.157444 | 0.807472 |
| Si | Si305 | 0.828917 | 0.311846 | 0.809067 |
| Si | Si306 | 0.711299 | 0.811973 | 0.289779 |
| Zn | Zn307 | 0.410206 | 0.758781 | 0.383664 |

**M-C<sub>6</sub>H<sub>11</sub>Zn-OH-Zn<sup>2+</sup> (Fig. 9a/M2 in Black)** Total energy = -1950.81402538 eV

```

data_
_audit_creation_method      'Materials Studio'
_cell_length_a              20.357621
_cell_length_b              20.050598
_cell_length_c              13.476578
_cell_angle_alpha           90.000000
_cell_angle_beta            90.000000
_cell_angle_gamma           90.000000
_symmetry_space_group_name_H-M  'P1'
loop_
_atom_site_type_symbol
_atom_site_label
_atom_site_fract_x
_atom_site_fract_y
_atom_site_fract_z
  H      H1              0.432045           0.792614           0.658208
  H      H2              0.512155           0.806139           0.700909
  H      H3              0.384260           0.640881           0.487710
  H      H4              0.498168           0.872865           0.553269
  H      H5              0.607039           0.827102           0.574090
  H      H6              0.589538           0.826076           0.446611
  H      H7              0.643474           0.720674           0.503763
  H      H8              0.564888           0.704334           0.454748
  H      H9              0.601500           0.714920           0.675050
  H      H10             0.580331           0.641339           0.611239
  H      H11             0.485658           0.686563           0.711320
  H      H12             0.467467           0.683604           0.583478
  C      C13             0.483592           0.783496           0.640103
  C      C14             0.504075           0.818620           0.543631
  C      C15             0.575880           0.803353           0.517555
  C      C16             0.590978           0.728470           0.516774
  C      C17             0.570860           0.695048           0.614591
  C      C18             0.498598           0.708612           0.639488
  O      O19             0.514536           0.026379           0.213700
  O      O20             0.026448           0.529696           0.715091
  O      O21             0.527012           0.443056           0.205966
  O      O22             0.012980           0.938020           0.702062
  O      O23             0.520056           0.950009           0.794560
  O      O24             0.018190           0.453838           0.288743
  O      O25             0.516905           0.543747           0.796100
  O      O26             0.023707           0.042518           0.293476
  O      O27             0.397962           0.060405           0.284443
  O      O28             0.145345           0.557170           0.781073
  O      O29             0.403533           0.443855           0.262545

```

|   |     |          |          |          |
|---|-----|----------|----------|----------|
| 0 | 030 | 0.133718 | 0.948010 | 0.769620 |
| 0 | 031 | 0.635750 | 0.935631 | 0.712500 |
| 0 | 032 | 0.899822 | 0.429929 | 0.219419 |
| 0 | 033 | 0.640963 | 0.543379 | 0.744449 |
| 0 | 034 | 0.898653 | 0.048490 | 0.242712 |
| 0 | 035 | 0.442153 | 0.116436 | 0.119653 |
| 0 | 036 | 0.101792 | 0.615143 | 0.617300 |
| 0 | 037 | 0.443382 | 0.364175 | 0.116039 |
| 0 | 038 | 0.105408 | 0.862780 | 0.623921 |
| 0 | 039 | 0.606009 | 0.864711 | 0.870333 |
| 0 | 040 | 0.940211 | 0.368840 | 0.381869 |
| 0 | 041 | 0.599327 | 0.618349 | 0.895728 |
| 0 | 042 | 0.944097 | 0.119405 | 0.394864 |
| 0 | 043 | 0.404866 | 0.989439 | 0.119501 |
| 0 | 044 | 0.132830 | 0.486107 | 0.618351 |
| 0 | 045 | 0.438608 | 0.495091 | 0.086811 |
| 0 | 046 | 0.103679 | 0.992905 | 0.588464 |
| 0 | 047 | 0.627782 | 0.995182 | 0.887088 |
| 0 | 048 | 0.911715 | 0.498763 | 0.384478 |
| 0 | 049 | 0.603268 | 0.486283 | 0.914263 |
| 0 | 050 | 0.935511 | 0.987391 | 0.409872 |
| 0 | 051 | 0.337672 | 0.060299 | 0.456270 |
| 0 | 052 | 0.206034 | 0.554813 | 0.952191 |
| 0 | 053 | 0.339858 | 0.442156 | 0.430665 |
| 0 | 054 | 0.199762 | 0.953769 | 0.937448 |
| 0 | 055 | 0.705882 | 0.922976 | 0.551898 |
| 0 | 056 | 0.833971 | 0.425840 | 0.053704 |
| 0 | 057 | 0.702918 | 0.546220 | 0.574325 |
| 0 | 058 | 0.836666 | 0.043191 | 0.071786 |
| 0 | 059 | 0.347818 | 0.946866 | 0.353995 |
| 0 | 060 | 0.188962 | 0.441299 | 0.852231 |
| 0 | 061 | 0.322672 | 0.544231 | 0.309111 |
| 0 | 062 | 0.212134 | 0.051212 | 0.806693 |
| 0 | 063 | 0.695407 | 0.041905 | 0.636815 |
| 0 | 064 | 0.851369 | 0.542431 | 0.143906 |
| 0 | 065 | 0.713179 | 0.439200 | 0.689076 |
| 0 | 066 | 0.836645 | 0.937727 | 0.189716 |
| 0 | 067 | 0.267952 | 0.043813 | 0.294216 |
| 0 | 068 | 0.273596 | 0.530962 | 0.788365 |
| 0 | 069 | 0.274758 | 0.425109 | 0.262534 |
| 0 | 070 | 0.263063 | 0.933523 | 0.768103 |
| 0 | 071 | 0.766553 | 0.947444 | 0.721281 |
| 0 | 072 | 0.770621 | 0.453251 | 0.220263 |
| 0 | 073 | 0.770450 | 0.552517 | 0.741973 |

|   |      |          |          |          |
|---|------|----------|----------|----------|
| 0 | 074  | 0.768620 | 0.045779 | 0.238367 |
| 0 | 075  | 0.303641 | 0.127850 | 0.615272 |
| 0 | 076  | 0.231738 | 0.624632 | 0.113266 |
| 0 | 077  | 0.325715 | 0.367992 | 0.586964 |
| 0 | 078  | 0.206879 | 0.870474 | 0.083980 |
| 0 | 079  | 0.728946 | 0.858997 | 0.385772 |
| 0 | 080  | 0.811780 | 0.357020 | 0.891336 |
| 0 | 081  | 0.724914 | 0.621626 | 0.419780 |
| 0 | 082  | 0.818028 | 0.118296 | 0.916689 |
| 0 | 083  | 0.222058 | 0.036583 | 0.542298 |
| 0 | 084  | 0.319222 | 0.537591 | 0.045589 |
| 0 | 085  | 0.220155 | 0.425582 | 0.504557 |
| 0 | 086  | 0.317717 | 0.923965 | 0.008063 |
| 0 | 087  | 0.815089 | 0.948938 | 0.451142 |
| 0 | 088  | 0.723843 | 0.446491 | 0.952727 |
| 0 | 089  | 0.823785 | 0.554092 | 0.504381 |
| 0 | 090  | 0.716332 | 0.055389 | 0.999975 |
| 0 | 091  | 0.332075 | 0.999043 | 0.630296 |
| 0 | 092  | 0.208367 | 0.494647 | 0.126003 |
| 0 | 093  | 0.306416 | 0.498763 | 0.601549 |
| 0 | 094  | 0.238441 | 0.997528 | 0.114324 |
| 0 | 095  | 0.700124 | 0.988934 | 0.382661 |
| 0 | 096  | 0.837603 | 0.486721 | 0.879725 |
| 0 | 097  | 0.733380 | 0.490209 | 0.401709 |
| 0 | 098  | 0.804772 | 0.987006 | 0.900147 |
| 0 | 099  | 0.131000 | 0.122510 | 0.601425 |
| 0 | 0100 | 0.411638 | 0.625018 | 0.097879 |
| 0 | 0101 | 0.122441 | 0.356179 | 0.584626 |
| 0 | 0102 | 0.412138 | 0.858243 | 0.100143 |
| 0 | 0103 | 0.904364 | 0.858093 | 0.403856 |
| 0 | 0104 | 0.632605 | 0.356884 | 0.907647 |
| 0 | 0105 | 0.916613 | 0.628566 | 0.422377 |
| 0 | 0106 | 0.621206 | 0.125915 | 0.915022 |
| 0 | 0107 | 0.119038 | 0.064413 | 0.426219 |
| 0 | 0108 | 0.418455 | 0.564591 | 0.923557 |
| 0 | 0109 | 0.097310 | 0.440544 | 0.441390 |
| 0 | 0110 | 0.441094 | 0.936153 | 0.947864 |
| 0 | 0111 | 0.913328 | 0.921274 | 0.575774 |
| 0 | 0112 | 0.626249 | 0.420025 | 0.079836 |
| 0 | 0113 | 0.947384 | 0.542286 | 0.562602 |
| 0 | 0114 | 0.593711 | 0.044764 | 0.062553 |
| 0 | 0115 | 0.144633 | 0.040673 | 0.234673 |
| 0 | 0116 | 0.397480 | 0.535294 | 0.732158 |
| 0 | 0117 | 0.143542 | 0.423570 | 0.258328 |

|   |      |          |          |          |
|---|------|----------|----------|----------|
| 0 | 0118 | 0.394036 | 0.926363 | 0.764124 |
| 0 | 0119 | 0.892961 | 0.951217 | 0.766023 |
| 0 | 0120 | 0.646203 | 0.446814 | 0.271556 |
| 0 | 0121 | 0.901077 | 0.559082 | 0.746227 |
| 0 | 0122 | 0.638878 | 0.061420 | 0.247380 |
| 0 | 0123 | 0.102955 | 0.943892 | 0.353029 |
| 0 | 0124 | 0.440845 | 0.442958 | 0.857215 |
| 0 | 0125 | 0.111605 | 0.543945 | 0.322132 |
| 0 | 0126 | 0.431009 | 0.043783 | 0.833315 |
| 0 | 0127 | 0.940366 | 0.041851 | 0.642928 |
| 0 | 0128 | 0.606983 | 0.541634 | 0.147553 |
| 0 | 0129 | 0.932536 | 0.439120 | 0.683539 |
| 0 | 0130 | 0.613399 | 0.941028 | 0.180907 |
| 0 | 0131 | 0.226636 | 0.125070 | 0.152593 |
| 0 | 0132 | 0.314401 | 0.622525 | 0.660018 |
| 0 | 0133 | 0.211118 | 0.362080 | 0.121042 |
| 0 | 0134 | 0.323944 | 0.865984 | 0.629876 |
| 0 | 0135 | 0.816674 | 0.861288 | 0.849066 |
| 0 | 0136 | 0.730805 | 0.363766 | 0.352226 |
| 0 | 0137 | 0.832677 | 0.619873 | 0.882213 |
| 0 | 0138 | 0.714201 | 0.121598 | 0.377010 |
| 0 | 0139 | 0.520741 | 0.850936 | 0.212151 |
| 0 | 0140 | 0.025344 | 0.348769 | 0.718093 |
| 0 | 0141 | 0.519786 | 0.631085 | 0.209454 |
| 0 | 0142 | 0.023586 | 0.131911 | 0.714130 |
| 0 | 0143 | 0.521950 | 0.134195 | 0.785755 |
| 0 | 0144 | 0.015005 | 0.631095 | 0.292356 |
| 0 | 0145 | 0.526032 | 0.352270 | 0.792941 |
| 0 | 0146 | 0.013567 | 0.855604 | 0.295463 |
| 0 | 0147 | 0.407857 | 0.825020 | 0.292073 |
| 0 | 0148 | 0.147407 | 0.327864 | 0.773039 |
| 0 | 0149 | 0.405019 | 0.659975 | 0.290235 |
| 0 | 0150 | 0.139570 | 0.159190 | 0.791914 |
| 0 | 0151 | 0.643100 | 0.148452 | 0.723712 |
| 0 | 0152 | 0.894839 | 0.653138 | 0.231445 |
| 0 | 0153 | 0.642636 | 0.329892 | 0.714001 |
| 0 | 0154 | 0.900544 | 0.824520 | 0.212022 |
| 0 | 0155 | 0.457537 | 0.741225 | 0.155492 |
| 0 | 0156 | 0.088241 | 0.240028 | 0.656624 |
| 0 | 0157 | 0.590906 | 0.241804 | 0.838729 |
| 0 | 0158 | 0.953087 | 0.742993 | 0.345479 |
| 0 | 0159 | 0.334020 | 0.820574 | 0.446333 |
| 0 | 0160 | 0.217017 | 0.324323 | 0.933579 |
| 0 | 0161 | 0.338352 | 0.643841 | 0.468362 |

|   |      |          |          |          |
|---|------|----------|----------|----------|
| 0 | 0162 | 0.205759 | 0.138146 | 0.959158 |
| 0 | 0163 | 0.714697 | 0.162323 | 0.565086 |
| 0 | 0164 | 0.826984 | 0.661757 | 0.068975 |
| 0 | 0165 | 0.706911 | 0.346389 | 0.544899 |
| 0 | 0166 | 0.837998 | 0.846672 | 0.042257 |
| 0 | 0167 | 0.265834 | 0.849002 | 0.256472 |
| 0 | 0168 | 0.274421 | 0.360309 | 0.765748 |
| 0 | 0169 | 0.260209 | 0.671846 | 0.294482 |
| 0 | 0170 | 0.271237 | 0.167527 | 0.797976 |
| 0 | 0171 | 0.772123 | 0.125894 | 0.733539 |
| 0 | 0172 | 0.767611 | 0.623004 | 0.234214 |
| 0 | 0173 | 0.774107 | 0.324429 | 0.707776 |
| 0 | 0174 | 0.769573 | 0.825942 | 0.203372 |
| 0 | 0175 | 0.295280 | 0.741579 | 0.590568 |
| 0 | 0176 | 0.246460 | 0.240061 | 0.073845 |
| 0 | 0177 | 0.744866 | 0.245754 | 0.424370 |
| 0 | 0178 | 0.800708 | 0.744211 | 0.924911 |
| 0 | 0179 | 0.215378 | 0.837706 | 0.525862 |
| 0 | 0180 | 0.327323 | 0.341178 | 0.034936 |
| 0 | 0181 | 0.215666 | 0.641996 | 0.529195 |
| 0 | 0182 | 0.327813 | 0.140539 | 0.028859 |
| 0 | 0183 | 0.826974 | 0.146306 | 0.468155 |
| 0 | 0184 | 0.717568 | 0.644769 | 0.964935 |
| 0 | 0185 | 0.828841 | 0.341793 | 0.478549 |
| 0 | 0186 | 0.716473 | 0.841038 | 0.972348 |
| 0 | 0187 | 0.132439 | 0.739515 | 0.573880 |
| 0 | 0188 | 0.408852 | 0.240335 | 0.077229 |
| 0 | 0189 | 0.911943 | 0.244772 | 0.428530 |
| 0 | 0190 | 0.632477 | 0.743268 | 0.927659 |
| 0 | 0191 | 0.101356 | 0.824866 | 0.432804 |
| 0 | 0192 | 0.436009 | 0.321281 | 0.929023 |
| 0 | 0193 | 0.104350 | 0.654350 | 0.429206 |
| 0 | 0194 | 0.440145 | 0.157016 | 0.933139 |
| 0 | 0195 | 0.932832 | 0.165407 | 0.580237 |
| 0 | 0196 | 0.613840 | 0.664577 | 0.081033 |
| 0 | 0197 | 0.943403 | 0.331757 | 0.569352 |
| 0 | 0198 | 0.601187 | 0.836152 | 0.061088 |
| 0 | 0199 | 0.136126 | 0.838610 | 0.242446 |
| 0 | 0200 | 0.402385 | 0.343072 | 0.741088 |
| 0 | 0201 | 0.135559 | 0.659895 | 0.236963 |
| 0 | 0202 | 0.397083 | 0.157140 | 0.746582 |
| 0 | 0203 | 0.899593 | 0.137706 | 0.766426 |
| 0 | 0204 | 0.641469 | 0.640254 | 0.270604 |
| 0 | 0205 | 0.900685 | 0.321407 | 0.755579 |



|    |       |          |          |          |
|----|-------|----------|----------|----------|
| O  | O206  | 0.643580 | 0.820543 | 0.247274 |
| O  | O207  | 0.211050 | 0.749727 | 0.152230 |
| O  | O208  | 0.320945 | 0.251682 | 0.670904 |
| O  | O209  | 0.818358 | 0.233127 | 0.829553 |
| O  | O210  | 0.726432 | 0.734346 | 0.326209 |
| Al | Al211 | 0.331678 | 0.864082 | 0.330955 |
| Al | Al212 | 0.329601 | 0.628437 | 0.327673 |
| Si | Si213 | 0.715044 | 0.655146 | 0.311401 |
| Si | Si214 | 0.439963 | 0.048115 | 0.184304 |
| Si | Si215 | 0.101082 | 0.546849 | 0.682183 |
| Si | Si216 | 0.451772 | 0.436639 | 0.168207 |
| Si | Si217 | 0.089749 | 0.935604 | 0.671008 |
| Si | Si218 | 0.597001 | 0.936810 | 0.817550 |
| Si | Si219 | 0.943009 | 0.437898 | 0.319718 |
| Si | Si220 | 0.591358 | 0.547817 | 0.838018 |
| Si | Si221 | 0.949593 | 0.049420 | 0.335110 |
| Si | Si222 | 0.338020 | 0.025780 | 0.346650 |
| Si | Si223 | 0.203243 | 0.520784 | 0.843845 |
| Si | Si224 | 0.334850 | 0.465563 | 0.315165 |
| Si | Si225 | 0.201982 | 0.971437 | 0.820894 |
| Si | Si226 | 0.701202 | 0.962313 | 0.656655 |
| Si | Si227 | 0.838847 | 0.463017 | 0.160005 |
| Si | Si228 | 0.707113 | 0.519898 | 0.687847 |
| Si | Si229 | 0.835034 | 0.018663 | 0.186052 |
| Si | Si230 | 0.298823 | 0.056116 | 0.560502 |
| Si | Si231 | 0.241399 | 0.553423 | 0.060360 |
| Si | Si232 | 0.297809 | 0.433289 | 0.530865 |
| Si | Si233 | 0.240656 | 0.935975 | 0.037082 |
| Si | Si234 | 0.737705 | 0.929770 | 0.442127 |
| Si | Si235 | 0.801701 | 0.428820 | 0.944079 |
| Si | Si236 | 0.746384 | 0.552998 | 0.474191 |
| Si | Si237 | 0.793892 | 0.050960 | 0.971477 |
| Si | Si238 | 0.144274 | 0.054432 | 0.539507 |
| Si | Si239 | 0.396638 | 0.556010 | 0.039306 |
| Si | Si240 | 0.143463 | 0.427196 | 0.536985 |
| Si | Si241 | 0.393610 | 0.927498 | 0.044069 |
| Si | Si242 | 0.892168 | 0.928659 | 0.460086 |
| Si | Si243 | 0.646708 | 0.427082 | 0.963925 |
| Si | Si244 | 0.899852 | 0.555727 | 0.468310 |
| Si | Si245 | 0.639930 | 0.055270 | 0.966061 |
| Si | Si246 | 0.097621 | 0.022860 | 0.327301 |
| Si | Si247 | 0.443485 | 0.521496 | 0.828530 |
| Si | Si248 | 0.092891 | 0.465326 | 0.326698 |
| Si | Si249 | 0.446359 | 0.964329 | 0.834918 |

|    |       |          |          |          |
|----|-------|----------|----------|----------|
| Si | Si250 | 0.940217 | 0.962988 | 0.671235 |
| Si | Si251 | 0.601211 | 0.462818 | 0.175593 |
| Si | Si252 | 0.951781 | 0.517572 | 0.677351 |
| Si | Si253 | 0.589869 | 0.018743 | 0.176721 |
| Si | Si254 | 0.219921 | 0.051039 | 0.199606 |
| Si | Si255 | 0.322356 | 0.545018 | 0.696620 |
| Si | Si256 | 0.210188 | 0.427082 | 0.192319 |
| Si | Si257 | 0.327724 | 0.932370 | 0.698064 |
| Si | Si258 | 0.820150 | 0.937290 | 0.808593 |
| Si | Si259 | 0.720644 | 0.438874 | 0.311143 |
| Si | Si260 | 0.834917 | 0.554075 | 0.812757 |
| Si | Si261 | 0.706063 | 0.054366 | 0.311583 |
| Si | Si262 | 0.449402 | 0.818335 | 0.188123 |
| Si | Si263 | 0.095735 | 0.318260 | 0.683191 |
| Si | Si264 | 0.447622 | 0.663771 | 0.189740 |
| Si | Si265 | 0.095673 | 0.163090 | 0.691107 |
| Si | Si266 | 0.594039 | 0.162782 | 0.815692 |
| Si | Si267 | 0.945181 | 0.664196 | 0.322734 |
| Si | Si268 | 0.598019 | 0.320220 | 0.813195 |
| Si | Si269 | 0.943173 | 0.820302 | 0.314113 |
| Si | Si270 | 0.207197 | 0.363796 | 0.830652 |
| Si | Si271 | 0.206582 | 0.128950 | 0.839553 |
| Si | Si272 | 0.706424 | 0.119582 | 0.665862 |
| Si | Si273 | 0.835313 | 0.619642 | 0.170340 |
| Si | Si274 | 0.708709 | 0.360162 | 0.663713 |
| Si | Si275 | 0.836812 | 0.859139 | 0.161333 |
| Si | Si276 | 0.291436 | 0.817943 | 0.547548 |
| Si | Si277 | 0.250776 | 0.317300 | 0.041680 |
| Si | Si278 | 0.287497 | 0.663767 | 0.566422 |
| Si | Si279 | 0.251641 | 0.161073 | 0.052484 |
| Si | Si280 | 0.750260 | 0.168533 | 0.457908 |
| Si | Si281 | 0.794414 | 0.667362 | 0.959784 |
| Si | Si282 | 0.752694 | 0.324018 | 0.451234 |
| Si | Si283 | 0.793134 | 0.822916 | 0.948497 |
| Si | Si284 | 0.138129 | 0.816953 | 0.538584 |
| Si | Si285 | 0.403826 | 0.317033 | 0.039438 |
| Si | Si286 | 0.137304 | 0.662806 | 0.536887 |
| Si | Si287 | 0.404403 | 0.163377 | 0.040249 |
| Si | Si288 | 0.904009 | 0.168639 | 0.467781 |
| Si | Si289 | 0.640758 | 0.667336 | 0.967614 |
| Si | Si290 | 0.905945 | 0.321846 | 0.464435 |
| Si | Si291 | 0.639430 | 0.821285 | 0.958057 |
| Si | Si292 | 0.089354 | 0.865745 | 0.329802 |
| Si | Si293 | 0.451232 | 0.364764 | 0.830119 |

|    |       |          |          |          |
|----|-------|----------|----------|----------|
| Si | Si294 | 0.092078 | 0.622367 | 0.319674 |
| Si | Si295 | 0.447266 | 0.122910 | 0.824728 |
| Si | Si296 | 0.949024 | 0.119200 | 0.676264 |
| Si | Si297 | 0.595316 | 0.619232 | 0.177244 |
| Si | Si298 | 0.950318 | 0.360231 | 0.681419 |
| Si | Si299 | 0.595373 | 0.862307 | 0.174434 |
| Si | Si300 | 0.206283 | 0.827154 | 0.186227 |
| Si | Si301 | 0.330697 | 0.330198 | 0.692573 |
| Si | Si302 | 0.210642 | 0.676039 | 0.201216 |
| Si | Si303 | 0.323727 | 0.175040 | 0.707579 |
| Si | Si304 | 0.827208 | 0.154183 | 0.810199 |
| Si | Si305 | 0.826509 | 0.309995 | 0.796201 |
| Si | Si306 | 0.717255 | 0.810799 | 0.291033 |
| Zn | Zn307 | 0.442765 | 0.806571 | 0.430828 |

**TS-C<sub>6</sub>H<sub>11</sub>Zn-HTransfer-Concerted-Zn<sup>2+</sup> (Fig. 9a/TS2 in Black)**

Total energy = -1949.28574573 eV

data\_

\_audit\_creation\_method 'Materials Studio'

\_cell\_length\_a 20.357621

\_cell\_length\_b 20.050598

\_cell\_length\_c 13.476578

\_cell\_angle\_alpha 90.000000

\_cell\_angle\_beta 90.000000

\_cell\_angle\_gamma 90.000000

\_symmetry\_space\_group\_name\_H-M 'P1'

loop\_

\_atom\_site\_type\_symbol

\_atom\_site\_label

\_atom\_site\_fract\_x

\_atom\_site\_fract\_y

\_atom\_site\_fract\_z

|   |     |          |          |          |
|---|-----|----------|----------|----------|
| H | H1  | 0.446477 | 0.631215 | 0.520710 |
| H | H2  | 0.461903 | 0.672761 | 0.639055 |
| H | H3  | 0.406980 | 0.630895 | 0.502681 |
| H | H4  | 0.429935 | 0.773748 | 0.574962 |
| H | H5  | 0.528088 | 0.827236 | 0.598804 |
| H | H6  | 0.520926 | 0.840291 | 0.470737 |
| H | H7  | 0.633568 | 0.804831 | 0.528246 |
| H | H8  | 0.601102 | 0.752503 | 0.435193 |
| H | H9  | 0.596136 | 0.721639 | 0.658153 |
| H | H10 | 0.651135 | 0.684756 | 0.572985 |

|   |     |          |          |          |
|---|-----|----------|----------|----------|
| H | H11 | 0.555608 | 0.608668 | 0.592517 |
| H | H12 | 0.557535 | 0.643157 | 0.471340 |
| C | C13 | 0.484063 | 0.685567 | 0.567704 |
| C | C14 | 0.468348 | 0.751814 | 0.528546 |
| C | C15 | 0.528147 | 0.801428 | 0.526806 |
| C | C16 | 0.595038 | 0.768217 | 0.512638 |
| C | C17 | 0.602471 | 0.707338 | 0.579923 |
| C | C18 | 0.550495 | 0.654763 | 0.550091 |
| O | O19 | 0.516300 | 0.027624 | 0.208983 |
| O | O20 | 0.026195 | 0.532410 | 0.715228 |
| O | O21 | 0.527036 | 0.443405 | 0.206160 |
| O | O22 | 0.014925 | 0.940218 | 0.698690 |
| O | O23 | 0.521239 | 0.949246 | 0.786834 |
| O | O24 | 0.018092 | 0.456201 | 0.286138 |
| O | O25 | 0.517717 | 0.546842 | 0.795982 |
| O | O26 | 0.025662 | 0.045454 | 0.288746 |
| O | O27 | 0.399326 | 0.059794 | 0.279618 |
| O | O28 | 0.146554 | 0.560281 | 0.774277 |
| O | O29 | 0.402448 | 0.432202 | 0.257787 |
| O | O30 | 0.136049 | 0.952697 | 0.761733 |
| O | O31 | 0.638279 | 0.931515 | 0.709652 |
| O | O32 | 0.899671 | 0.431020 | 0.218514 |
| O | O33 | 0.640623 | 0.545828 | 0.740597 |
| O | O34 | 0.901150 | 0.048221 | 0.234918 |
| O | O35 | 0.443447 | 0.117771 | 0.116531 |
| O | O36 | 0.098303 | 0.617661 | 0.612323 |
| O | O37 | 0.449765 | 0.365194 | 0.102903 |
| O | O38 | 0.106710 | 0.864500 | 0.620356 |
| O | O39 | 0.605142 | 0.865753 | 0.870543 |
| O | O40 | 0.941161 | 0.371351 | 0.381507 |
| O | O41 | 0.601659 | 0.619849 | 0.894167 |
| O | O42 | 0.943645 | 0.122280 | 0.386098 |
| O | O43 | 0.407118 | 0.990614 | 0.112790 |
| O | O44 | 0.129853 | 0.488542 | 0.613313 |
| O | O45 | 0.437135 | 0.496618 | 0.091381 |
| O | O46 | 0.103435 | 0.994070 | 0.580053 |
| O | O47 | 0.628040 | 0.996733 | 0.879575 |
| O | O48 | 0.911790 | 0.501125 | 0.382188 |
| O | O49 | 0.604912 | 0.487684 | 0.911432 |
| O | O50 | 0.936887 | 0.990470 | 0.405095 |
| O | O51 | 0.336315 | 0.063615 | 0.449046 |
| O | O52 | 0.205557 | 0.555892 | 0.946131 |
| O | O53 | 0.341610 | 0.444605 | 0.428536 |
| O | O54 | 0.202568 | 0.948904 | 0.927778 |

|   |     |          |          |          |
|---|-----|----------|----------|----------|
| 0 | 055 | 0.705318 | 0.925860 | 0.545322 |
| 0 | 056 | 0.834916 | 0.426810 | 0.051852 |
| 0 | 057 | 0.703775 | 0.546785 | 0.571681 |
| 0 | 058 | 0.837832 | 0.041492 | 0.064742 |
| 0 | 059 | 0.352185 | 0.946973 | 0.356888 |
| 0 | 060 | 0.188499 | 0.443250 | 0.843562 |
| 0 | 061 | 0.342096 | 0.546019 | 0.301850 |
| 0 | 062 | 0.218845 | 0.050984 | 0.806035 |
| 0 | 063 | 0.693482 | 0.041855 | 0.639911 |
| 0 | 064 | 0.850609 | 0.543324 | 0.142829 |
| 0 | 065 | 0.712534 | 0.440593 | 0.688535 |
| 0 | 066 | 0.835450 | 0.938370 | 0.187415 |
| 0 | 067 | 0.270126 | 0.038540 | 0.285225 |
| 0 | 068 | 0.274682 | 0.532362 | 0.784811 |
| 0 | 069 | 0.272780 | 0.435529 | 0.264347 |
| 0 | 070 | 0.264566 | 0.932628 | 0.755597 |
| 0 | 071 | 0.768987 | 0.946149 | 0.712966 |
| 0 | 072 | 0.770351 | 0.452979 | 0.217425 |
| 0 | 073 | 0.770066 | 0.554145 | 0.740385 |
| 0 | 074 | 0.771041 | 0.049392 | 0.231922 |
| 0 | 075 | 0.305350 | 0.128780 | 0.611809 |
| 0 | 076 | 0.230822 | 0.626727 | 0.104984 |
| 0 | 077 | 0.321808 | 0.367501 | 0.581192 |
| 0 | 078 | 0.208093 | 0.870074 | 0.079514 |
| 0 | 079 | 0.732466 | 0.860977 | 0.381816 |
| 0 | 080 | 0.813321 | 0.357230 | 0.890126 |
| 0 | 081 | 0.723634 | 0.622463 | 0.417556 |
| 0 | 082 | 0.820045 | 0.118324 | 0.911193 |
| 0 | 083 | 0.223201 | 0.037186 | 0.540365 |
| 0 | 084 | 0.318626 | 0.538701 | 0.040972 |
| 0 | 085 | 0.220776 | 0.432447 | 0.501250 |
| 0 | 086 | 0.319351 | 0.923680 | 0.004015 |
| 0 | 087 | 0.816960 | 0.951435 | 0.449381 |
| 0 | 088 | 0.724097 | 0.445272 | 0.951689 |
| 0 | 089 | 0.824550 | 0.557852 | 0.501391 |
| 0 | 090 | 0.717401 | 0.055867 | 0.993091 |
| 0 | 091 | 0.335182 | 0.999913 | 0.621991 |
| 0 | 092 | 0.207143 | 0.496222 | 0.119444 |
| 0 | 093 | 0.311734 | 0.498588 | 0.601557 |
| 0 | 094 | 0.237180 | 0.998965 | 0.102648 |
| 0 | 095 | 0.703148 | 0.990919 | 0.375466 |
| 0 | 096 | 0.836749 | 0.487328 | 0.877657 |
| 0 | 097 | 0.735596 | 0.491242 | 0.399230 |
| 0 | 098 | 0.804785 | 0.987423 | 0.892152 |

|   |      |          |          |          |
|---|------|----------|----------|----------|
| 0 | 099  | 0.131679 | 0.123393 | 0.595180 |
| 0 | 0100 | 0.408281 | 0.625540 | 0.104799 |
| 0 | 0101 | 0.126676 | 0.358068 | 0.583511 |
| 0 | 0102 | 0.416160 | 0.859811 | 0.092426 |
| 0 | 0103 | 0.906075 | 0.861095 | 0.398021 |
| 0 | 0104 | 0.630699 | 0.357573 | 0.907564 |
| 0 | 0105 | 0.920529 | 0.630376 | 0.423143 |
| 0 | 0106 | 0.621656 | 0.127184 | 0.911462 |
| 0 | 0107 | 0.122637 | 0.065889 | 0.419277 |
| 0 | 0108 | 0.421855 | 0.566487 | 0.927971 |
| 0 | 0109 | 0.097874 | 0.439679 | 0.437116 |
| 0 | 0110 | 0.441574 | 0.937450 | 0.939639 |
| 0 | 0111 | 0.916491 | 0.922966 | 0.570510 |
| 0 | 0112 | 0.625935 | 0.422387 | 0.078705 |
| 0 | 0113 | 0.947059 | 0.541802 | 0.562050 |
| 0 | 0114 | 0.595171 | 0.043957 | 0.056963 |
| 0 | 0115 | 0.146384 | 0.042189 | 0.227673 |
| 0 | 0116 | 0.398666 | 0.541356 | 0.734658 |
| 0 | 0117 | 0.142769 | 0.425727 | 0.252762 |
| 0 | 0118 | 0.395460 | 0.925103 | 0.755146 |
| 0 | 0119 | 0.894602 | 0.950421 | 0.761227 |
| 0 | 0120 | 0.646395 | 0.449386 | 0.270798 |
| 0 | 0121 | 0.900493 | 0.559907 | 0.745148 |
| 0 | 0122 | 0.640955 | 0.063381 | 0.240929 |
| 0 | 0123 | 0.103786 | 0.945628 | 0.346164 |
| 0 | 0124 | 0.441804 | 0.445399 | 0.854893 |
| 0 | 0125 | 0.111847 | 0.545530 | 0.321088 |
| 0 | 0126 | 0.431987 | 0.043336 | 0.822580 |
| 0 | 0127 | 0.940988 | 0.043223 | 0.640528 |
| 0 | 0128 | 0.605147 | 0.543448 | 0.147806 |
| 0 | 0129 | 0.934186 | 0.439664 | 0.684905 |
| 0 | 0130 | 0.615216 | 0.942227 | 0.178921 |
| 0 | 0131 | 0.231137 | 0.125590 | 0.148853 |
| 0 | 0132 | 0.314492 | 0.624127 | 0.655567 |
| 0 | 0133 | 0.216657 | 0.363556 | 0.124000 |
| 0 | 0134 | 0.327569 | 0.866723 | 0.615532 |
| 0 | 0135 | 0.817482 | 0.861199 | 0.844485 |
| 0 | 0136 | 0.729661 | 0.364701 | 0.350997 |
| 0 | 0137 | 0.831582 | 0.620423 | 0.881901 |
| 0 | 0138 | 0.715803 | 0.123825 | 0.370850 |
| 0 | 0139 | 0.521835 | 0.852469 | 0.210160 |
| 0 | 0140 | 0.027658 | 0.348986 | 0.713751 |
| 0 | 0141 | 0.518440 | 0.632677 | 0.212331 |
| 0 | 0142 | 0.025136 | 0.133592 | 0.709545 |

|   |      |          |          |          |
|---|------|----------|----------|----------|
| 0 | 0143 | 0.523939 | 0.133640 | 0.779336 |
| 0 | 0144 | 0.016112 | 0.633413 | 0.287823 |
| 0 | 0145 | 0.527094 | 0.355434 | 0.786950 |
| 0 | 0146 | 0.015251 | 0.856298 | 0.288839 |
| 0 | 0147 | 0.407161 | 0.822063 | 0.282921 |
| 0 | 0148 | 0.149369 | 0.327337 | 0.772223 |
| 0 | 0149 | 0.405633 | 0.673006 | 0.293236 |
| 0 | 0150 | 0.141871 | 0.156454 | 0.786864 |
| 0 | 0151 | 0.645627 | 0.152462 | 0.721643 |
| 0 | 0152 | 0.893978 | 0.652986 | 0.233649 |
| 0 | 0153 | 0.645238 | 0.329724 | 0.714687 |
| 0 | 0154 | 0.901441 | 0.825797 | 0.207459 |
| 0 | 0155 | 0.461020 | 0.742598 | 0.147985 |
| 0 | 0156 | 0.091903 | 0.240808 | 0.653489 |
| 0 | 0157 | 0.588513 | 0.243105 | 0.836099 |
| 0 | 0158 | 0.953466 | 0.744852 | 0.342264 |
| 0 | 0159 | 0.330822 | 0.813358 | 0.434880 |
| 0 | 0160 | 0.218265 | 0.330065 | 0.934490 |
| 0 | 0161 | 0.337652 | 0.645957 | 0.464417 |
| 0 | 0162 | 0.207641 | 0.139705 | 0.955520 |
| 0 | 0163 | 0.714614 | 0.159994 | 0.560202 |
| 0 | 0164 | 0.829266 | 0.663308 | 0.068446 |
| 0 | 0165 | 0.707528 | 0.347954 | 0.544114 |
| 0 | 0166 | 0.838598 | 0.848591 | 0.038313 |
| 0 | 0167 | 0.268632 | 0.855801 | 0.250991 |
| 0 | 0168 | 0.276370 | 0.360406 | 0.764936 |
| 0 | 0169 | 0.262236 | 0.665223 | 0.289091 |
| 0 | 0170 | 0.272998 | 0.169307 | 0.794150 |
| 0 | 0171 | 0.774027 | 0.126312 | 0.728163 |
| 0 | 0172 | 0.766470 | 0.624430 | 0.231154 |
| 0 | 0173 | 0.776994 | 0.327595 | 0.705079 |
| 0 | 0174 | 0.770377 | 0.825208 | 0.199129 |
| 0 | 0175 | 0.292698 | 0.741697 | 0.587110 |
| 0 | 0176 | 0.248238 | 0.241684 | 0.069727 |
| 0 | 0177 | 0.745158 | 0.247069 | 0.424224 |
| 0 | 0178 | 0.800623 | 0.745035 | 0.923818 |
| 0 | 0179 | 0.215716 | 0.839757 | 0.520128 |
| 0 | 0180 | 0.330515 | 0.342020 | 0.032806 |
| 0 | 0181 | 0.214234 | 0.641063 | 0.529409 |
| 0 | 0182 | 0.330181 | 0.142891 | 0.022558 |
| 0 | 0183 | 0.827873 | 0.147733 | 0.465068 |
| 0 | 0184 | 0.718062 | 0.646260 | 0.970124 |
| 0 | 0185 | 0.828982 | 0.344068 | 0.475386 |
| 0 | 0186 | 0.717292 | 0.843271 | 0.968272 |

|    |       |          |          |          |
|----|-------|----------|----------|----------|
| O  | O187  | 0.132665 | 0.741434 | 0.569756 |
| O  | O188  | 0.413299 | 0.241164 | 0.068873 |
| O  | O189  | 0.911946 | 0.247005 | 0.425497 |
| O  | O190  | 0.633868 | 0.744425 | 0.927080 |
| O  | O191  | 0.100859 | 0.827462 | 0.429422 |
| O  | O192  | 0.434881 | 0.321337 | 0.917831 |
| O  | O193  | 0.105065 | 0.657370 | 0.424802 |
| O  | O194  | 0.443492 | 0.154155 | 0.928488 |
| O  | O195  | 0.935390 | 0.165710 | 0.573737 |
| O  | O196  | 0.611070 | 0.665927 | 0.080076 |
| O  | O197  | 0.942847 | 0.332947 | 0.568309 |
| O  | O198  | 0.603320 | 0.836521 | 0.061000 |
| O  | O199  | 0.138941 | 0.839121 | 0.240187 |
| O  | O200  | 0.403729 | 0.349245 | 0.730904 |
| O  | O201  | 0.137109 | 0.660680 | 0.232647 |
| O  | O202  | 0.399033 | 0.158616 | 0.742588 |
| O  | O203  | 0.901144 | 0.140993 | 0.760787 |
| O  | O204  | 0.640546 | 0.642959 | 0.269643 |
| O  | O205  | 0.903142 | 0.321557 | 0.755533 |
| O  | O206  | 0.644536 | 0.822183 | 0.247559 |
| O  | O207  | 0.216509 | 0.750897 | 0.154779 |
| O  | O208  | 0.323806 | 0.253027 | 0.667955 |
| O  | O209  | 0.818155 | 0.233930 | 0.825627 |
| O  | O210  | 0.726986 | 0.735667 | 0.325539 |
| Al | Al211 | 0.334946 | 0.865317 | 0.327663 |
| Al | Al212 | 0.332790 | 0.628568 | 0.333316 |
| Si | Si213 | 0.714783 | 0.656711 | 0.309390 |
| Si | Si214 | 0.441564 | 0.048815 | 0.179524 |
| Si | Si215 | 0.100006 | 0.549806 | 0.677904 |
| Si | Si216 | 0.452656 | 0.434430 | 0.165200 |
| Si | Si217 | 0.091226 | 0.937853 | 0.665051 |
| Si | Si218 | 0.597750 | 0.936420 | 0.813060 |
| Si | Si219 | 0.943296 | 0.439948 | 0.318232 |
| Si | Si220 | 0.592535 | 0.549601 | 0.836338 |
| Si | Si221 | 0.951095 | 0.051563 | 0.328628 |
| Si | Si222 | 0.339641 | 0.025185 | 0.342392 |
| Si | Si223 | 0.203518 | 0.522715 | 0.837291 |
| Si | Si224 | 0.339413 | 0.466576 | 0.312335 |
| Si | Si225 | 0.205614 | 0.971153 | 0.813097 |
| Si | Si226 | 0.701867 | 0.961882 | 0.652918 |
| Si | Si227 | 0.838919 | 0.463737 | 0.158370 |
| Si | Si228 | 0.707195 | 0.521198 | 0.685724 |
| Si | Si229 | 0.836411 | 0.019311 | 0.180085 |
| Si | Si230 | 0.300115 | 0.057553 | 0.555330 |



|    |       |          |          |          |
|----|-------|----------|----------|----------|
| Si | Si231 | 0.240597 | 0.554983 | 0.054168 |
| Si | Si232 | 0.298691 | 0.435755 | 0.527933 |
| Si | Si233 | 0.241721 | 0.934884 | 0.030171 |
| Si | Si234 | 0.739819 | 0.932304 | 0.437235 |
| Si | Si235 | 0.802160 | 0.428938 | 0.942571 |
| Si | Si236 | 0.747331 | 0.554290 | 0.471591 |
| Si | Si237 | 0.794967 | 0.050841 | 0.964774 |
| Si | Si238 | 0.145616 | 0.055388 | 0.533515 |
| Si | Si239 | 0.395970 | 0.557082 | 0.041896 |
| Si | Si240 | 0.144112 | 0.429618 | 0.533666 |
| Si | Si241 | 0.395516 | 0.928729 | 0.037258 |
| Si | Si242 | 0.894285 | 0.931230 | 0.455501 |
| Si | Si243 | 0.646610 | 0.427754 | 0.962698 |
| Si | Si244 | 0.901114 | 0.557642 | 0.467045 |
| Si | Si245 | 0.640768 | 0.055839 | 0.960155 |
| Si | Si246 | 0.099680 | 0.024647 | 0.320835 |
| Si | Si247 | 0.444372 | 0.524647 | 0.829928 |
| Si | Si248 | 0.093071 | 0.466847 | 0.323598 |
| Si | Si249 | 0.447216 | 0.963942 | 0.825892 |
| Si | Si250 | 0.942080 | 0.964170 | 0.667241 |
| Si | Si251 | 0.600794 | 0.464339 | 0.175103 |
| Si | Si252 | 0.951987 | 0.518442 | 0.677340 |
| Si | Si253 | 0.591570 | 0.019814 | 0.172046 |
| Si | Si254 | 0.221866 | 0.050567 | 0.191928 |
| Si | Si255 | 0.324015 | 0.548044 | 0.694249 |
| Si | Si256 | 0.210705 | 0.430747 | 0.190091 |
| Si | Si257 | 0.330009 | 0.931849 | 0.686761 |
| Si | Si258 | 0.821414 | 0.936821 | 0.802229 |
| Si | Si259 | 0.720925 | 0.439814 | 0.309298 |
| Si | Si260 | 0.834411 | 0.555031 | 0.811644 |
| Si | Si261 | 0.708248 | 0.056741 | 0.305011 |
| Si | Si262 | 0.451256 | 0.819812 | 0.181728 |
| Si | Si263 | 0.098733 | 0.319054 | 0.680560 |
| Si | Si264 | 0.447745 | 0.667515 | 0.189070 |
| Si | Si265 | 0.097830 | 0.163404 | 0.686573 |
| Si | Si266 | 0.594676 | 0.164267 | 0.812068 |
| Si | Si267 | 0.946607 | 0.665692 | 0.321557 |
| Si | Si268 | 0.597805 | 0.321435 | 0.811158 |
| Si | Si269 | 0.944595 | 0.821997 | 0.309221 |
| Si | Si270 | 0.208556 | 0.365572 | 0.828342 |
| Si | Si271 | 0.209530 | 0.128872 | 0.836102 |
| Si | Si272 | 0.707057 | 0.119959 | 0.663397 |
| Si | Si273 | 0.835377 | 0.620596 | 0.169747 |
| Si | Si274 | 0.710087 | 0.361441 | 0.662951 |

|    |       |          |          |          |
|----|-------|----------|----------|----------|
| Si | Si275 | 0.837228 | 0.859959 | 0.157646 |
| Si | Si276 | 0.291173 | 0.816253 | 0.539468 |
| Si | Si277 | 0.253595 | 0.319555 | 0.040793 |
| Si | Si278 | 0.288508 | 0.663352 | 0.558020 |
| Si | Si279 | 0.254111 | 0.162649 | 0.048276 |
| Si | Si280 | 0.751043 | 0.169277 | 0.454399 |
| Si | Si281 | 0.794909 | 0.668517 | 0.960408 |
| Si | Si282 | 0.752802 | 0.325439 | 0.449898 |
| Si | Si283 | 0.793780 | 0.824162 | 0.944938 |
| Si | Si284 | 0.138709 | 0.818634 | 0.534315 |
| Si | Si285 | 0.406894 | 0.317620 | 0.030903 |
| Si | Si286 | 0.137212 | 0.664412 | 0.533720 |
| Si | Si287 | 0.407164 | 0.163811 | 0.034522 |
| Si | Si288 | 0.904867 | 0.170256 | 0.462494 |
| Si | Si289 | 0.641240 | 0.668768 | 0.968330 |
| Si | Si290 | 0.906151 | 0.323821 | 0.462668 |
| Si | Si291 | 0.640330 | 0.822635 | 0.956853 |
| Si | Si292 | 0.090716 | 0.867118 | 0.325088 |
| Si | Si293 | 0.451757 | 0.367826 | 0.822541 |
| Si | Si294 | 0.093219 | 0.624308 | 0.316167 |
| Si | Si295 | 0.449207 | 0.122331 | 0.818386 |
| Si | Si296 | 0.950675 | 0.120825 | 0.671470 |
| Si | Si297 | 0.593891 | 0.620994 | 0.177216 |
| Si | Si298 | 0.952047 | 0.360807 | 0.680370 |
| Si | Si299 | 0.596736 | 0.863672 | 0.173660 |
| Si | Si300 | 0.209406 | 0.828995 | 0.184072 |
| Si | Si301 | 0.331187 | 0.331981 | 0.687752 |
| Si | Si302 | 0.212725 | 0.675573 | 0.197611 |
| Si | Si303 | 0.325606 | 0.176270 | 0.703819 |
| Si | Si304 | 0.828547 | 0.155222 | 0.805252 |
| Si | Si305 | 0.828348 | 0.310952 | 0.794228 |
| Si | Si306 | 0.718833 | 0.812026 | 0.288654 |
| Zn | Zn307 | 0.419126 | 0.754448 | 0.397522 |

**C<sub>6</sub>H<sub>10</sub>-Phys.Ads-H<sub>2</sub>-Phys.Ads-Zn<sup>2+</sup> (Fig. 9a/M3 in Black)**

Total energy = -1951.28220396 eV

data\_

|                        |                    |
|------------------------|--------------------|
| _audit_creation_method | 'Materials Studio' |
| _cell_length_a         | 20.357621          |
| _cell_length_b         | 20.050598          |
| _cell_length_c         | 13.476578          |
| _cell_angle_alpha      | 90.000000          |
| _cell_angle_beta       | 90.000000          |

```

_cell_angle_gamma      90.000000
_symmetry_space_group_name_H-M  'P1'
loop_
_atom_site_type_symbol
_atom_site_label
_atom_site_fract_x
_atom_site_fract_y
_atom_site_fract_z
  H      H1      0.472386      0.479283      0.479001
  H      H2      0.435250      0.782081      0.594571
  H      H3      0.497843      0.467137      0.444304
  H      H4      0.497084      0.810356      0.446268
  H      H5      0.597275      0.728953      0.452945
  H      H6      0.547901      0.716428      0.348877
  H      H7      0.576392      0.608055      0.437381
  H      H8      0.491319      0.620753      0.430605
  H      H9      0.579148      0.653727      0.608538
  H      H10     0.525240      0.585504      0.601690
  H      H11     0.484884      0.694398      0.694777
  H      H12     0.429885      0.652937      0.618699
  C      C13     0.466408      0.744358      0.560416
  C      C14     0.499068      0.759418      0.474633
  C      C15     0.548193      0.712086      0.429560
  C      C16     0.536730      0.640100      0.463805
  C      C17     0.532274      0.636908      0.577005
  C      C18     0.476144      0.680652      0.616889
  O      O19     0.512470      0.027106      0.213247
  O      O20     0.018816      0.537722      0.714879
  O      O21     0.519253      0.438863      0.207419
  O      O22     0.012064      0.937663      0.706011
  O      O23     0.519866      0.947592      0.794965
  O      O24     0.011286      0.454844      0.285503
  O      O25     0.512664      0.543871      0.800514
  O      O26     0.022403      0.038895      0.294304
  O      O27     0.395407      0.057914      0.284049
  O      O28     0.143644      0.552900      0.760454
  O      O29     0.390649      0.425393      0.241673
  O      O30     0.134098      0.945712      0.766935
  O      O31     0.637008      0.931806      0.718531
  O      O32     0.891988      0.423613      0.222782
  O      O33     0.633357      0.529333      0.739654
  O      O34     0.897369      0.045211      0.244746
  O      O35     0.439426      0.118958      0.123645
  O      O36     0.094978      0.613368      0.601763

```

|   |     |          |          |          |
|---|-----|----------|----------|----------|
| 0 | 037 | 0.447004 | 0.366302 | 0.087701 |
| 0 | 038 | 0.100944 | 0.858959 | 0.625601 |
| 0 | 039 | 0.603675 | 0.865478 | 0.879917 |
| 0 | 040 | 0.939187 | 0.368541 | 0.385899 |
| 0 | 041 | 0.604489 | 0.617902 | 0.880094 |
| 0 | 042 | 0.944472 | 0.118682 | 0.393607 |
| 0 | 043 | 0.403783 | 0.991988 | 0.114473 |
| 0 | 044 | 0.109693 | 0.481813 | 0.602175 |
| 0 | 045 | 0.435430 | 0.497924 | 0.088557 |
| 0 | 046 | 0.101270 | 0.988107 | 0.585378 |
| 0 | 047 | 0.625923 | 0.996381 | 0.888380 |
| 0 | 048 | 0.904274 | 0.497321 | 0.381879 |
| 0 | 049 | 0.598907 | 0.487456 | 0.920610 |
| 0 | 050 | 0.933820 | 0.987192 | 0.414513 |
| 0 | 051 | 0.334186 | 0.056952 | 0.454357 |
| 0 | 052 | 0.217116 | 0.554237 | 0.919503 |
| 0 | 053 | 0.326276 | 0.418510 | 0.410243 |
| 0 | 054 | 0.198302 | 0.944455 | 0.935510 |
| 0 | 055 | 0.702589 | 0.922324 | 0.553212 |
| 0 | 056 | 0.828804 | 0.424260 | 0.054473 |
| 0 | 057 | 0.698450 | 0.543658 | 0.573662 |
| 0 | 058 | 0.835034 | 0.037865 | 0.073667 |
| 0 | 059 | 0.349166 | 0.942991 | 0.355124 |
| 0 | 060 | 0.185528 | 0.437731 | 0.836490 |
| 0 | 061 | 0.348423 | 0.536981 | 0.327960 |
| 0 | 062 | 0.213026 | 0.046679 | 0.811974 |
| 0 | 063 | 0.693674 | 0.040097 | 0.642453 |
| 0 | 064 | 0.848145 | 0.538712 | 0.150421 |
| 0 | 065 | 0.717934 | 0.435713 | 0.684402 |
| 0 | 066 | 0.831420 | 0.935533 | 0.197493 |
| 0 | 067 | 0.266232 | 0.036202 | 0.290759 |
| 0 | 068 | 0.268766 | 0.516886 | 0.747891 |
| 0 | 069 | 0.262530 | 0.452975 | 0.248901 |
| 0 | 070 | 0.263373 | 0.929698 | 0.766211 |
| 0 | 071 | 0.767637 | 0.944788 | 0.719359 |
| 0 | 072 | 0.763064 | 0.450405 | 0.219251 |
| 0 | 073 | 0.761198 | 0.553103 | 0.745760 |
| 0 | 074 | 0.767313 | 0.047038 | 0.239862 |
| 0 | 075 | 0.303385 | 0.122753 | 0.616172 |
| 0 | 076 | 0.217757 | 0.623408 | 0.083521 |
| 0 | 077 | 0.310499 | 0.358995 | 0.580735 |
| 0 | 078 | 0.208947 | 0.864258 | 0.086756 |
| 0 | 079 | 0.729599 | 0.854500 | 0.391922 |
| 0 | 080 | 0.807821 | 0.356080 | 0.890671 |

|   |      |          |          |          |
|---|------|----------|----------|----------|
| 0 | 081  | 0.712147 | 0.616304 | 0.414814 |
| 0 | 082  | 0.820716 | 0.116090 | 0.921070 |
| 0 | 083  | 0.220868 | 0.031175 | 0.544789 |
| 0 | 084  | 0.314390 | 0.536801 | 0.048159 |
| 0 | 085  | 0.214755 | 0.435180 | 0.511019 |
| 0 | 086  | 0.316558 | 0.922883 | 0.008810 |
| 0 | 087  | 0.813980 | 0.946479 | 0.456324 |
| 0 | 088  | 0.717766 | 0.442217 | 0.955342 |
| 0 | 089  | 0.817305 | 0.557591 | 0.497412 |
| 0 | 090  | 0.715518 | 0.056404 | 0.000401 |
| 0 | 091  | 0.332668 | 0.994310 | 0.627994 |
| 0 | 092  | 0.196636 | 0.491140 | 0.089251 |
| 0 | 093  | 0.325416 | 0.490581 | 0.574919 |
| 0 | 094  | 0.232288 | 0.994265 | 0.110296 |
| 0 | 095  | 0.700121 | 0.983733 | 0.379922 |
| 0 | 096  | 0.829674 | 0.486431 | 0.881638 |
| 0 | 097  | 0.728588 | 0.485454 | 0.402725 |
| 0 | 098  | 0.801571 | 0.986048 | 0.899570 |
| 0 | 099  | 0.129728 | 0.117419 | 0.599999 |
| 0 | 0100 | 0.405303 | 0.626220 | 0.094489 |
| 0 | 0101 | 0.122363 | 0.351978 | 0.580427 |
| 0 | 0102 | 0.410896 | 0.860189 | 0.104489 |
| 0 | 0103 | 0.904627 | 0.857405 | 0.406609 |
| 0 | 0104 | 0.623854 | 0.356497 | 0.907846 |
| 0 | 0105 | 0.918241 | 0.625981 | 0.425944 |
| 0 | 0106 | 0.620286 | 0.127282 | 0.916148 |
| 0 | 0107 | 0.119538 | 0.059672 | 0.424584 |
| 0 | 0108 | 0.410987 | 0.561937 | 0.920901 |
| 0 | 0109 | 0.098175 | 0.426614 | 0.424385 |
| 0 | 0110 | 0.439996 | 0.932696 | 0.947350 |
| 0 | 0111 | 0.912866 | 0.919023 | 0.579407 |
| 0 | 0112 | 0.619702 | 0.416131 | 0.082283 |
| 0 | 0113 | 0.938150 | 0.534552 | 0.562819 |
| 0 | 0114 | 0.593121 | 0.046180 | 0.064090 |
| 0 | 0115 | 0.142836 | 0.044174 | 0.231838 |
| 0 | 0116 | 0.396276 | 0.534295 | 0.727286 |
| 0 | 0117 | 0.134154 | 0.429826 | 0.234938 |
| 0 | 0118 | 0.394375 | 0.921875 | 0.763015 |
| 0 | 0119 | 0.892385 | 0.946692 | 0.770923 |
| 0 | 0120 | 0.639173 | 0.442488 | 0.274645 |
| 0 | 0121 | 0.891961 | 0.556540 | 0.744574 |
| 0 | 0122 | 0.637178 | 0.058635 | 0.249982 |
| 0 | 0123 | 0.105585 | 0.941162 | 0.341680 |
| 0 | 0124 | 0.437031 | 0.440628 | 0.852767 |

|   |      |          |          |          |
|---|------|----------|----------|----------|
| 0 | 0125 | 0.105479 | 0.542108 | 0.330083 |
| 0 | 0126 | 0.429701 | 0.039793 | 0.832085 |
| 0 | 0127 | 0.936250 | 0.039580 | 0.647871 |
| 0 | 0128 | 0.600336 | 0.536946 | 0.150516 |
| 0 | 0129 | 0.933580 | 0.436907 | 0.693952 |
| 0 | 0130 | 0.609014 | 0.939832 | 0.178148 |
| 0 | 0131 | 0.230900 | 0.122570 | 0.151242 |
| 0 | 0132 | 0.316681 | 0.615063 | 0.635761 |
| 0 | 0133 | 0.215822 | 0.361543 | 0.125409 |
| 0 | 0134 | 0.325647 | 0.861452 | 0.628145 |
| 0 | 0135 | 0.812310 | 0.859626 | 0.853427 |
| 0 | 0136 | 0.725579 | 0.359510 | 0.351670 |
| 0 | 0137 | 0.826955 | 0.619503 | 0.882297 |
| 0 | 0138 | 0.711427 | 0.116644 | 0.383588 |
| 0 | 0139 | 0.517421 | 0.849371 | 0.218863 |
| 0 | 0140 | 0.025407 | 0.343953 | 0.715435 |
| 0 | 0141 | 0.513302 | 0.628201 | 0.207022 |
| 0 | 0142 | 0.022796 | 0.128150 | 0.713695 |
| 0 | 0143 | 0.522263 | 0.129231 | 0.784170 |
| 0 | 0144 | 0.012312 | 0.630733 | 0.288321 |
| 0 | 0145 | 0.523134 | 0.352238 | 0.782397 |
| 0 | 0146 | 0.012707 | 0.853285 | 0.295463 |
| 0 | 0147 | 0.401711 | 0.814486 | 0.289886 |
| 0 | 0148 | 0.148070 | 0.320563 | 0.768069 |
| 0 | 0149 | 0.400085 | 0.667157 | 0.285361 |
| 0 | 0150 | 0.139327 | 0.154250 | 0.789737 |
| 0 | 0151 | 0.643460 | 0.149149 | 0.725151 |
| 0 | 0152 | 0.890155 | 0.650852 | 0.237419 |
| 0 | 0153 | 0.643143 | 0.329291 | 0.716329 |
| 0 | 0154 | 0.898365 | 0.823534 | 0.215395 |
| 0 | 0155 | 0.458081 | 0.741345 | 0.148626 |
| 0 | 0156 | 0.087493 | 0.235160 | 0.652459 |
| 0 | 0157 | 0.585224 | 0.241189 | 0.835162 |
| 0 | 0158 | 0.950792 | 0.741396 | 0.347861 |
| 0 | 0159 | 0.329013 | 0.812041 | 0.446082 |
| 0 | 0160 | 0.210674 | 0.326777 | 0.936215 |
| 0 | 0161 | 0.332809 | 0.660384 | 0.449530 |
| 0 | 0162 | 0.204634 | 0.136878 | 0.959002 |
| 0 | 0163 | 0.717714 | 0.159904 | 0.569461 |
| 0 | 0164 | 0.827207 | 0.657372 | 0.070901 |
| 0 | 0165 | 0.705067 | 0.341049 | 0.545103 |
| 0 | 0166 | 0.835310 | 0.846923 | 0.046850 |
| 0 | 0167 | 0.263087 | 0.846129 | 0.263378 |
| 0 | 0168 | 0.275502 | 0.351941 | 0.770586 |

|    |       |          |          |          |
|----|-------|----------|----------|----------|
| 0  | 0169  | 0.258949 | 0.642650 | 0.269641 |
| 0  | 0170  | 0.270611 | 0.163732 | 0.797376 |
| 0  | 0171  | 0.771506 | 0.122704 | 0.740086 |
| 0  | 0172  | 0.763545 | 0.620928 | 0.234167 |
| 0  | 0173  | 0.774573 | 0.319647 | 0.706782 |
| 0  | 0174  | 0.767206 | 0.821968 | 0.207443 |
| 0  | 0175  | 0.288923 | 0.737898 | 0.594472 |
| 0  | 0176  | 0.245279 | 0.239367 | 0.071559 |
| 0  | 0177  | 0.743238 | 0.241612 | 0.423638 |
| 0  | 0178  | 0.798542 | 0.743198 | 0.931746 |
| 0  | 0179  | 0.213299 | 0.838654 | 0.531090 |
| 0  | 0180  | 0.326124 | 0.339496 | 0.025666 |
| 0  | 0181  | 0.212613 | 0.638874 | 0.523459 |
| 0  | 0182  | 0.328005 | 0.141580 | 0.022901 |
| 0  | 0183  | 0.827012 | 0.143584 | 0.465641 |
| 0  | 0184  | 0.714813 | 0.644940 | 0.975036 |
| 0  | 0185  | 0.825898 | 0.339751 | 0.474727 |
| 0  | 0186  | 0.713632 | 0.839058 | 0.979991 |
| 0  | 0187  | 0.131239 | 0.737750 | 0.570657 |
| 0  | 0188  | 0.410006 | 0.241056 | 0.067997 |
| 0  | 0189  | 0.911416 | 0.243640 | 0.431116 |
| 0  | 0190  | 0.630229 | 0.742210 | 0.928334 |
| 0  | 0191  | 0.100997 | 0.825919 | 0.432926 |
| 0  | 0192  | 0.428433 | 0.315144 | 0.908226 |
| 0  | 0193  | 0.105064 | 0.659863 | 0.417778 |
| 0  | 0194  | 0.443039 | 0.151506 | 0.933628 |
| 0  | 0195  | 0.931889 | 0.162304 | 0.580357 |
| 0  | 0196  | 0.601542 | 0.656620 | 0.069650 |
| 0  | 0197  | 0.938002 | 0.331750 | 0.573041 |
| 0  | 0198  | 0.598367 | 0.829915 | 0.068614 |
| 0  | 0199  | 0.134393 | 0.830373 | 0.240905 |
| 0  | 0200  | 0.400648 | 0.348032 | 0.721505 |
| 0  | 0201  | 0.132341 | 0.651592 | 0.224879 |
| 0  | 0202  | 0.396974 | 0.153154 | 0.747673 |
| 0  | 0203  | 0.899329 | 0.138621 | 0.767842 |
| 0  | 0204  | 0.636950 | 0.641632 | 0.258270 |
| 0  | 0205  | 0.900544 | 0.318844 | 0.761038 |
| 0  | 0206  | 0.640920 | 0.822564 | 0.255177 |
| 0  | 0207  | 0.215109 | 0.743457 | 0.158315 |
| 0  | 0208  | 0.322863 | 0.246674 | 0.670194 |
| 0  | 0209  | 0.816844 | 0.231302 | 0.834550 |
| 0  | 0210  | 0.720660 | 0.731245 | 0.328548 |
| Al | Al211 | 0.331550 | 0.860573 | 0.333962 |
| Al | Al212 | 0.330076 | 0.620370 | 0.329356 |

|    |       |          |          |          |
|----|-------|----------|----------|----------|
| Si | Si213 | 0.708843 | 0.652764 | 0.307500 |
| Si | Si214 | 0.437945 | 0.048840 | 0.183863 |
| Si | Si215 | 0.092124 | 0.546466 | 0.669274 |
| Si | Si216 | 0.446725 | 0.432240 | 0.157586 |
| Si | Si217 | 0.087942 | 0.932698 | 0.671120 |
| Si | Si218 | 0.596436 | 0.935781 | 0.821753 |
| Si | Si219 | 0.937462 | 0.436070 | 0.319982 |
| Si | Si220 | 0.588378 | 0.544346 | 0.836179 |
| Si | Si221 | 0.948718 | 0.047407 | 0.336737 |
| Si | Si222 | 0.336316 | 0.021523 | 0.345560 |
| Si | Si223 | 0.203542 | 0.515471 | 0.816774 |
| Si | Si224 | 0.332297 | 0.460202 | 0.306753 |
| Si | Si225 | 0.202174 | 0.966609 | 0.820639 |
| Si | Si226 | 0.700418 | 0.960183 | 0.659388 |
| Si | Si227 | 0.832882 | 0.459433 | 0.162363 |
| Si | Si228 | 0.703061 | 0.515189 | 0.686038 |
| Si | Si229 | 0.832860 | 0.016399 | 0.189245 |
| Si | Si230 | 0.297713 | 0.051501 | 0.560329 |
| Si | Si231 | 0.236038 | 0.552038 | 0.036193 |
| Si | Si232 | 0.293968 | 0.425822 | 0.518876 |
| Si | Si233 | 0.238831 | 0.930812 | 0.037042 |
| Si | Si234 | 0.736910 | 0.926742 | 0.444887 |
| Si | Si235 | 0.795948 | 0.426930 | 0.945246 |
| Si | Si236 | 0.739714 | 0.550597 | 0.471353 |
| Si | Si237 | 0.793103 | 0.049127 | 0.973266 |
| Si | Si238 | 0.143233 | 0.049386 | 0.538374 |
| Si | Si239 | 0.391229 | 0.555743 | 0.037774 |
| Si | Si240 | 0.136868 | 0.423825 | 0.529121 |
| Si | Si241 | 0.392427 | 0.927520 | 0.043989 |
| Si | Si242 | 0.891485 | 0.927310 | 0.463974 |
| Si | Si243 | 0.640198 | 0.425128 | 0.966634 |
| Si | Si244 | 0.894471 | 0.553809 | 0.467004 |
| Si | Si245 | 0.638947 | 0.056473 | 0.967136 |
| Si | Si246 | 0.097493 | 0.020743 | 0.323714 |
| Si | Si247 | 0.438738 | 0.519747 | 0.826402 |
| Si | Si248 | 0.087596 | 0.463498 | 0.318227 |
| Si | Si249 | 0.445794 | 0.960637 | 0.834352 |
| Si | Si250 | 0.938697 | 0.960686 | 0.675567 |
| Si | Si251 | 0.594114 | 0.458217 | 0.178381 |
| Si | Si252 | 0.945688 | 0.516254 | 0.679630 |
| Si | Si253 | 0.587769 | 0.018262 | 0.177054 |
| Si | Si254 | 0.218737 | 0.048649 | 0.196500 |
| Si | Si255 | 0.325965 | 0.538482 | 0.671718 |
| Si | Si256 | 0.203090 | 0.434054 | 0.174899 |



|    |       |          |          |          |
|----|-------|----------|----------|----------|
| Si | Si257 | 0.328209 | 0.928013 | 0.696533 |
| Si | Si258 | 0.818464 | 0.934848 | 0.810513 |
| Si | Si259 | 0.714499 | 0.434771 | 0.311630 |
| Si | Si260 | 0.827171 | 0.553284 | 0.813790 |
| Si | Si261 | 0.704545 | 0.051432 | 0.313573 |
| Si | Si262 | 0.446700 | 0.816758 | 0.189713 |
| Si | Si263 | 0.095517 | 0.313471 | 0.678712 |
| Si | Si264 | 0.443769 | 0.665033 | 0.183104 |
| Si | Si265 | 0.095003 | 0.158667 | 0.689345 |
| Si | Si266 | 0.592510 | 0.161944 | 0.815253 |
| Si | Si267 | 0.943322 | 0.662547 | 0.324813 |
| Si | Si268 | 0.593906 | 0.319617 | 0.810176 |
| Si | Si269 | 0.942152 | 0.818862 | 0.316412 |
| Si | Si270 | 0.205365 | 0.359493 | 0.827220 |
| Si | Si271 | 0.206137 | 0.125183 | 0.839750 |
| Si | Si272 | 0.706723 | 0.117725 | 0.670140 |
| Si | Si273 | 0.832596 | 0.616447 | 0.173709 |
| Si | Si274 | 0.709484 | 0.356377 | 0.663255 |
| Si | Si275 | 0.833791 | 0.857396 | 0.166376 |
| Si | Si276 | 0.288077 | 0.813498 | 0.550400 |
| Si | Si277 | 0.249627 | 0.316893 | 0.039924 |
| Si | Si278 | 0.287007 | 0.662512 | 0.549728 |
| Si | Si279 | 0.251984 | 0.160327 | 0.050387 |
| Si | Si280 | 0.749943 | 0.164992 | 0.459862 |
| Si | Si281 | 0.791841 | 0.666030 | 0.964345 |
| Si | Si282 | 0.749942 | 0.320093 | 0.449797 |
| Si | Si283 | 0.790205 | 0.821932 | 0.954102 |
| Si | Si284 | 0.136163 | 0.815736 | 0.539344 |
| Si | Si285 | 0.402613 | 0.315640 | 0.022801 |
| Si | Si286 | 0.135554 | 0.662140 | 0.528333 |
| Si | Si287 | 0.404689 | 0.162910 | 0.037605 |
| Si | Si288 | 0.903801 | 0.166841 | 0.467628 |
| Si | Si289 | 0.637846 | 0.665138 | 0.963301 |
| Si | Si290 | 0.903561 | 0.320748 | 0.466191 |
| Si | Si291 | 0.636761 | 0.819272 | 0.964392 |
| Si | Si292 | 0.089284 | 0.862655 | 0.326749 |
| Si | Si293 | 0.447329 | 0.363899 | 0.816049 |
| Si | Si294 | 0.089555 | 0.620930 | 0.314513 |
| Si | Si295 | 0.447659 | 0.118478 | 0.824254 |
| Si | Si296 | 0.947602 | 0.117160 | 0.677680 |
| Si | Si297 | 0.588339 | 0.615373 | 0.171189 |
| Si | Si298 | 0.949461 | 0.357886 | 0.685484 |
| Si | Si299 | 0.591843 | 0.860885 | 0.179421 |
| Si | Si300 | 0.206698 | 0.821098 | 0.189556 |

|    |       |          |          |          |
|----|-------|----------|----------|----------|
| Si | Si301 | 0.327179 | 0.326080 | 0.686897 |
| Si | Si302 | 0.207435 | 0.665235 | 0.186350 |
| Si | Si303 | 0.323748 | 0.170451 | 0.707790 |
| Si | Si304 | 0.827257 | 0.152579 | 0.814472 |
| Si | Si305 | 0.825474 | 0.307587 | 0.798316 |
| Si | Si306 | 0.714750 | 0.808598 | 0.295681 |
| Zn | Zn307 | 0.397666 | 0.738695 | 0.403566 |

**C<sub>6</sub>H<sub>10</sub>-Phys.Ads-Zn<sup>2+</sup> (Fig. 9a/M1 in Blue)** Total energy = -1943.93983722 eV

data\_

\_audit\_creation\_method 'Materials Studio'

\_cell\_length\_a 20.357621

\_cell\_length\_b 20.050598

\_cell\_length\_c 13.476578

\_cell\_angle\_alpha 90.000000

\_cell\_angle\_beta 90.000000

\_cell\_angle\_gamma 90.000000

\_symmetry\_space\_group\_name\_H-M 'P1'

loop\_

\_atom\_site\_type\_symbol

\_atom\_site\_label

\_atom\_site\_fract\_x

\_atom\_site\_fract\_y

\_atom\_site\_fract\_z

|   |     |          |          |          |
|---|-----|----------|----------|----------|
| H | H1  | 0.439311 | 0.806044 | 0.586044 |
| H | H2  | 0.499695 | 0.821953 | 0.432939 |
| H | H3  | 0.604478 | 0.750208 | 0.453488 |
| H | H4  | 0.554936 | 0.720354 | 0.357912 |
| H | H5  | 0.594868 | 0.628877 | 0.474425 |
| H | H6  | 0.508809 | 0.631905 | 0.466526 |
| H | H7  | 0.592012 | 0.697019 | 0.629667 |
| H | H8  | 0.546863 | 0.622768 | 0.643663 |
| H | H9  | 0.492220 | 0.734138 | 0.706144 |
| H | H10 | 0.443307 | 0.679000 | 0.639713 |
| C | C11 | 0.472525 | 0.766971 | 0.560997 |
| C | C12 | 0.504540 | 0.774705 | 0.472510 |
| C | C13 | 0.556711 | 0.726574 | 0.438366 |
| C | C14 | 0.552214 | 0.659515 | 0.492474 |
| C | C15 | 0.547777 | 0.670459 | 0.604719 |
| C | C16 | 0.486561 | 0.711263 | 0.632467 |
| O | O17 | 0.514397 | 0.025691 | 0.212652 |
| O | O18 | 0.024731 | 0.535190 | 0.718274 |
| O | O19 | 0.527844 | 0.436010 | 0.210187 |
| O | O20 | 0.013378 | 0.937340 | 0.702467 |

|   |     |          |          |          |
|---|-----|----------|----------|----------|
| 0 | 021 | 0.521285 | 0.944410 | 0.793954 |
| 0 | 022 | 0.018958 | 0.454212 | 0.291095 |
| 0 | 023 | 0.518145 | 0.544102 | 0.803966 |
| 0 | 024 | 0.023955 | 0.038565 | 0.291681 |
| 0 | 025 | 0.396831 | 0.058029 | 0.280655 |
| 0 | 026 | 0.145081 | 0.558517 | 0.779684 |
| 0 | 027 | 0.403784 | 0.429816 | 0.267360 |
| 0 | 028 | 0.134859 | 0.949130 | 0.765140 |
| 0 | 029 | 0.637161 | 0.934204 | 0.713005 |
| 0 | 030 | 0.901477 | 0.427518 | 0.219726 |
| 0 | 031 | 0.638783 | 0.534147 | 0.740790 |
| 0 | 032 | 0.898718 | 0.047794 | 0.242928 |
| 0 | 033 | 0.441723 | 0.113720 | 0.115598 |
| 0 | 034 | 0.102374 | 0.615900 | 0.614688 |
| 0 | 035 | 0.445277 | 0.361601 | 0.110467 |
| 0 | 036 | 0.104545 | 0.861170 | 0.623988 |
| 0 | 037 | 0.609069 | 0.861680 | 0.870009 |
| 0 | 038 | 0.941667 | 0.367959 | 0.383276 |
| 0 | 039 | 0.608785 | 0.615749 | 0.889953 |
| 0 | 040 | 0.947317 | 0.118033 | 0.394350 |
| 0 | 041 | 0.406176 | 0.986314 | 0.116596 |
| 0 | 042 | 0.126791 | 0.485828 | 0.619237 |
| 0 | 043 | 0.437933 | 0.493317 | 0.099606 |
| 0 | 044 | 0.102126 | 0.990501 | 0.583318 |
| 0 | 045 | 0.627336 | 0.992691 | 0.888327 |
| 0 | 046 | 0.910593 | 0.497512 | 0.383584 |
| 0 | 047 | 0.605233 | 0.483988 | 0.917799 |
| 0 | 048 | 0.934858 | 0.986467 | 0.410172 |
| 0 | 049 | 0.335202 | 0.058813 | 0.451721 |
| 0 | 050 | 0.206659 | 0.545259 | 0.948770 |
| 0 | 051 | 0.342325 | 0.432042 | 0.439043 |
| 0 | 052 | 0.200881 | 0.944808 | 0.931790 |
| 0 | 053 | 0.704923 | 0.920961 | 0.550793 |
| 0 | 054 | 0.836319 | 0.423675 | 0.053552 |
| 0 | 055 | 0.703539 | 0.544603 | 0.573682 |
| 0 | 056 | 0.836801 | 0.038294 | 0.071456 |
| 0 | 057 | 0.351458 | 0.943865 | 0.355978 |
| 0 | 058 | 0.193560 | 0.440500 | 0.827994 |
| 0 | 059 | 0.346101 | 0.541396 | 0.328664 |
| 0 | 060 | 0.218061 | 0.047023 | 0.809036 |
| 0 | 061 | 0.698035 | 0.039868 | 0.636935 |
| 0 | 062 | 0.853207 | 0.540103 | 0.144092 |
| 0 | 063 | 0.719354 | 0.436629 | 0.685449 |
| 0 | 064 | 0.837236 | 0.935682 | 0.194838 |

|   |      |          |          |          |
|---|------|----------|----------|----------|
| 0 | 065  | 0.267989 | 0.035828 | 0.287935 |
| 0 | 066  | 0.274237 | 0.539124 | 0.783003 |
| 0 | 067  | 0.273820 | 0.437031 | 0.274655 |
| 0 | 068  | 0.263741 | 0.929137 | 0.760302 |
| 0 | 069  | 0.768079 | 0.943474 | 0.718719 |
| 0 | 070  | 0.772126 | 0.451098 | 0.219774 |
| 0 | 071  | 0.767264 | 0.552491 | 0.745378 |
| 0 | 072  | 0.768718 | 0.044691 | 0.237453 |
| 0 | 073  | 0.302221 | 0.128223 | 0.609978 |
| 0 | 074  | 0.229028 | 0.621236 | 0.102586 |
| 0 | 075  | 0.313476 | 0.365756 | 0.599726 |
| 0 | 076  | 0.208520 | 0.865901 | 0.084372 |
| 0 | 077  | 0.728075 | 0.855897 | 0.386404 |
| 0 | 078  | 0.813524 | 0.355891 | 0.890175 |
| 0 | 079  | 0.724456 | 0.618943 | 0.417651 |
| 0 | 080  | 0.820050 | 0.116362 | 0.919061 |
| 0 | 081  | 0.221700 | 0.033704 | 0.542373 |
| 0 | 082  | 0.319083 | 0.532872 | 0.047862 |
| 0 | 083  | 0.219710 | 0.432848 | 0.507225 |
| 0 | 084  | 0.318194 | 0.920830 | 0.007119 |
| 0 | 085  | 0.815097 | 0.945486 | 0.451253 |
| 0 | 086  | 0.724924 | 0.443023 | 0.956193 |
| 0 | 087  | 0.824421 | 0.554351 | 0.504570 |
| 0 | 088  | 0.716636 | 0.054166 | 0.999331 |
| 0 | 089  | 0.333480 | 0.001297 | 0.630126 |
| 0 | 090  | 0.207488 | 0.490133 | 0.124736 |
| 0 | 091  | 0.312952 | 0.497862 | 0.603965 |
| 0 | 092  | 0.235351 | 0.995542 | 0.105900 |
| 0 | 093  | 0.700803 | 0.985984 | 0.380650 |
| 0 | 094  | 0.836726 | 0.486082 | 0.880524 |
| 0 | 095  | 0.735724 | 0.487740 | 0.401973 |
| 0 | 096  | 0.803586 | 0.985943 | 0.897487 |
| 0 | 097  | 0.129886 | 0.119991 | 0.596441 |
| 0 | 098  | 0.407516 | 0.621479 | 0.110483 |
| 0 | 099  | 0.129024 | 0.355292 | 0.591691 |
| 0 | 0100 | 0.412092 | 0.854849 | 0.099575 |
| 0 | 0101 | 0.906325 | 0.856541 | 0.404609 |
| 0 | 0102 | 0.633699 | 0.354073 | 0.908618 |
| 0 | 0103 | 0.920033 | 0.626660 | 0.425950 |
| 0 | 0104 | 0.621898 | 0.123998 | 0.912546 |
| 0 | 0105 | 0.120761 | 0.061457 | 0.421549 |
| 0 | 0106 | 0.421596 | 0.562607 | 0.934439 |
| 0 | 0107 | 0.096310 | 0.434841 | 0.444296 |
| 0 | 0108 | 0.441648 | 0.929779 | 0.946220 |

|   |      |          |          |          |
|---|------|----------|----------|----------|
| 0 | 0109 | 0.913604 | 0.919862 | 0.576158 |
| 0 | 0110 | 0.626702 | 0.415458 | 0.081917 |
| 0 | 0111 | 0.947259 | 0.536956 | 0.563056 |
| 0 | 0112 | 0.594159 | 0.044578 | 0.062342 |
| 0 | 0113 | 0.144477 | 0.040755 | 0.229398 |
| 0 | 0114 | 0.399521 | 0.536044 | 0.741011 |
| 0 | 0115 | 0.143985 | 0.422166 | 0.261801 |
| 0 | 0116 | 0.395003 | 0.925973 | 0.761663 |
| 0 | 0117 | 0.893625 | 0.948703 | 0.766929 |
| 0 | 0118 | 0.647896 | 0.444773 | 0.272707 |
| 0 | 0119 | 0.897895 | 0.557447 | 0.743885 |
| 0 | 0120 | 0.638940 | 0.059588 | 0.247588 |
| 0 | 0121 | 0.106388 | 0.941251 | 0.345689 |
| 0 | 0122 | 0.443579 | 0.441949 | 0.863325 |
| 0 | 0123 | 0.113774 | 0.541680 | 0.331027 |
| 0 | 0124 | 0.435997 | 0.040021 | 0.839473 |
| 0 | 0125 | 0.939810 | 0.040261 | 0.643657 |
| 0 | 0126 | 0.603651 | 0.536556 | 0.147776 |
| 0 | 0127 | 0.936878 | 0.437379 | 0.690649 |
| 0 | 0128 | 0.612397 | 0.939774 | 0.179382 |
| 0 | 0129 | 0.229934 | 0.122896 | 0.150256 |
| 0 | 0130 | 0.325381 | 0.623828 | 0.651672 |
| 0 | 0131 | 0.221437 | 0.357522 | 0.141605 |
| 0 | 0132 | 0.330129 | 0.868962 | 0.619007 |
| 0 | 0133 | 0.816542 | 0.859699 | 0.851106 |
| 0 | 0134 | 0.732983 | 0.361456 | 0.352048 |
| 0 | 0135 | 0.831934 | 0.619090 | 0.882822 |
| 0 | 0136 | 0.714445 | 0.118699 | 0.378378 |
| 0 | 0137 | 0.519740 | 0.849546 | 0.213159 |
| 0 | 0138 | 0.028558 | 0.345407 | 0.719347 |
| 0 | 0139 | 0.519684 | 0.627971 | 0.213858 |
| 0 | 0140 | 0.024157 | 0.130513 | 0.712425 |
| 0 | 0141 | 0.523072 | 0.132225 | 0.782831 |
| 0 | 0142 | 0.019325 | 0.630272 | 0.297499 |
| 0 | 0143 | 0.527974 | 0.352093 | 0.792599 |
| 0 | 0144 | 0.015257 | 0.853139 | 0.295092 |
| 0 | 0145 | 0.404961 | 0.815963 | 0.288292 |
| 0 | 0146 | 0.150028 | 0.321239 | 0.779589 |
| 0 | 0147 | 0.407969 | 0.668221 | 0.297435 |
| 0 | 0148 | 0.140991 | 0.152241 | 0.788363 |
| 0 | 0149 | 0.644307 | 0.146609 | 0.721238 |
| 0 | 0150 | 0.899211 | 0.648745 | 0.234555 |
| 0 | 0151 | 0.644946 | 0.329860 | 0.714611 |
| 0 | 0152 | 0.901364 | 0.822162 | 0.213658 |

|   |      |          |          |          |
|---|------|----------|----------|----------|
| 0 | 0153 | 0.461558 | 0.738571 | 0.152097 |
| 0 | 0154 | 0.091797 | 0.237600 | 0.656535 |
| 0 | 0155 | 0.591753 | 0.240112 | 0.835523 |
| 0 | 0156 | 0.954500 | 0.741151 | 0.347444 |
| 0 | 0157 | 0.330900 | 0.812408 | 0.442575 |
| 0 | 0158 | 0.209084 | 0.338010 | 0.950311 |
| 0 | 0159 | 0.341259 | 0.662175 | 0.462305 |
| 0 | 0160 | 0.206098 | 0.136042 | 0.956720 |
| 0 | 0161 | 0.719114 | 0.160255 | 0.565770 |
| 0 | 0162 | 0.834037 | 0.660393 | 0.070269 |
| 0 | 0163 | 0.708546 | 0.342566 | 0.544538 |
| 0 | 0164 | 0.839115 | 0.846787 | 0.044470 |
| 0 | 0165 | 0.266465 | 0.849601 | 0.258323 |
| 0 | 0166 | 0.279463 | 0.344674 | 0.787205 |
| 0 | 0167 | 0.265212 | 0.656819 | 0.285686 |
| 0 | 0168 | 0.271913 | 0.165607 | 0.794687 |
| 0 | 0169 | 0.772964 | 0.124047 | 0.736801 |
| 0 | 0170 | 0.771139 | 0.622662 | 0.233701 |
| 0 | 0171 | 0.776405 | 0.320564 | 0.707387 |
| 0 | 0172 | 0.770316 | 0.823441 | 0.204523 |
| 0 | 0173 | 0.293975 | 0.744027 | 0.599271 |
| 0 | 0174 | 0.245343 | 0.238950 | 0.067630 |
| 0 | 0175 | 0.746556 | 0.243100 | 0.422706 |
| 0 | 0176 | 0.802436 | 0.743244 | 0.928729 |
| 0 | 0177 | 0.216303 | 0.841129 | 0.528395 |
| 0 | 0178 | 0.328188 | 0.338534 | 0.030868 |
| 0 | 0179 | 0.220528 | 0.640761 | 0.536529 |
| 0 | 0180 | 0.328326 | 0.139987 | 0.023583 |
| 0 | 0181 | 0.829275 | 0.144031 | 0.463130 |
| 0 | 0182 | 0.720627 | 0.644787 | 0.978320 |
| 0 | 0183 | 0.830522 | 0.339039 | 0.479223 |
| 0 | 0184 | 0.717384 | 0.839155 | 0.977003 |
| 0 | 0185 | 0.136771 | 0.739580 | 0.574441 |
| 0 | 0186 | 0.409865 | 0.238189 | 0.074895 |
| 0 | 0187 | 0.914947 | 0.243542 | 0.429655 |
| 0 | 0188 | 0.634722 | 0.740776 | 0.930510 |
| 0 | 0189 | 0.103400 | 0.824330 | 0.432873 |
| 0 | 0190 | 0.436230 | 0.317916 | 0.924418 |
| 0 | 0191 | 0.112553 | 0.656031 | 0.428175 |
| 0 | 0192 | 0.441052 | 0.156437 | 0.929424 |
| 0 | 0193 | 0.932524 | 0.163496 | 0.580310 |
| 0 | 0194 | 0.609199 | 0.658903 | 0.078004 |
| 0 | 0195 | 0.945264 | 0.331905 | 0.570769 |
| 0 | 0196 | 0.600119 | 0.834297 | 0.060993 |

|    |       |          |          |          |
|----|-------|----------|----------|----------|
| O  | O197  | 0.137461 | 0.832215 | 0.241703 |
| O  | O198  | 0.404702 | 0.347606 | 0.737380 |
| O  | O199  | 0.138935 | 0.654611 | 0.234949 |
| O  | O200  | 0.397237 | 0.147062 | 0.742972 |
| O  | O201  | 0.900749 | 0.136191 | 0.767446 |
| O  | O202  | 0.643702 | 0.635440 | 0.265492 |
| O  | O203  | 0.903181 | 0.318779 | 0.756438 |
| O  | O204  | 0.643293 | 0.819578 | 0.246277 |
| O  | O205  | 0.217491 | 0.745515 | 0.156870 |
| O  | O206  | 0.329889 | 0.248414 | 0.672531 |
| O  | O207  | 0.820308 | 0.231350 | 0.832188 |
| O  | O208  | 0.724121 | 0.731898 | 0.325125 |
| Al | Al209 | 0.334311 | 0.861665 | 0.331033 |
| Al | Al210 | 0.334899 | 0.625404 | 0.340523 |
| Si | Si211 | 0.716284 | 0.652425 | 0.308806 |
| Si | Si212 | 0.439759 | 0.045916 | 0.181377 |
| Si | Si213 | 0.099508 | 0.548940 | 0.682071 |
| Si | Si214 | 0.452312 | 0.430382 | 0.172681 |
| Si | Si215 | 0.089608 | 0.934640 | 0.668714 |
| Si | Si216 | 0.598445 | 0.933780 | 0.817881 |
| Si | Si217 | 0.943889 | 0.436786 | 0.320610 |
| Si | Si218 | 0.594001 | 0.544142 | 0.839036 |
| Si | Si219 | 0.950430 | 0.047708 | 0.334637 |
| Si | Si220 | 0.337962 | 0.022141 | 0.343706 |
| Si | Si221 | 0.204918 | 0.520423 | 0.835387 |
| Si | Si222 | 0.341491 | 0.461873 | 0.326593 |
| Si | Si223 | 0.204240 | 0.967399 | 0.817179 |
| Si | Si224 | 0.702331 | 0.960047 | 0.655941 |
| Si | Si225 | 0.840714 | 0.460717 | 0.160051 |
| Si | Si226 | 0.707563 | 0.516619 | 0.686532 |
| Si | Si227 | 0.835387 | 0.016578 | 0.187004 |
| Si | Si228 | 0.298174 | 0.055558 | 0.557559 |
| Si | Si229 | 0.240565 | 0.548014 | 0.057179 |
| Si | Si230 | 0.297191 | 0.432236 | 0.537356 |
| Si | Si231 | 0.240563 | 0.931188 | 0.034022 |
| Si | Si232 | 0.737652 | 0.927061 | 0.441550 |
| Si | Si233 | 0.802893 | 0.426903 | 0.944728 |
| Si | Si234 | 0.747351 | 0.551226 | 0.473658 |
| Si | Si235 | 0.794240 | 0.048734 | 0.971434 |
| Si | Si236 | 0.143982 | 0.051676 | 0.535705 |
| Si | Si237 | 0.396097 | 0.552621 | 0.048229 |
| Si | Si238 | 0.143326 | 0.427121 | 0.540579 |
| Si | Si239 | 0.394060 | 0.923743 | 0.042604 |
| Si | Si240 | 0.892623 | 0.926908 | 0.460382 |

|    |       |          |          |          |
|----|-------|----------|----------|----------|
| Si | Si241 | 0.647818 | 0.423671 | 0.966403 |
| Si | Si242 | 0.900720 | 0.553741 | 0.469125 |
| Si | Si243 | 0.640213 | 0.053799 | 0.965367 |
| Si | Si244 | 0.098843 | 0.020333 | 0.322519 |
| Si | Si245 | 0.445074 | 0.520963 | 0.836712 |
| Si | Si246 | 0.093548 | 0.463347 | 0.331322 |
| Si | Si247 | 0.448140 | 0.960327 | 0.834992 |
| Si | Si248 | 0.940391 | 0.961416 | 0.671781 |
| Si | Si249 | 0.601127 | 0.457838 | 0.177717 |
| Si | Si250 | 0.951710 | 0.516573 | 0.679630 |
| Si | Si251 | 0.589737 | 0.017794 | 0.176062 |
| Si | Si252 | 0.220133 | 0.048093 | 0.194033 |
| Si | Si253 | 0.327207 | 0.548273 | 0.694923 |
| Si | Si254 | 0.212441 | 0.427299 | 0.200601 |
| Si | Si255 | 0.329815 | 0.932577 | 0.693247 |
| Si | Si256 | 0.820458 | 0.935028 | 0.808118 |
| Si | Si257 | 0.722622 | 0.436561 | 0.311205 |
| Si | Si258 | 0.833179 | 0.553259 | 0.813380 |
| Si | Si259 | 0.706314 | 0.052218 | 0.311248 |
| Si | Si260 | 0.449225 | 0.815118 | 0.187514 |
| Si | Si261 | 0.099693 | 0.315275 | 0.686785 |
| Si | Si262 | 0.448995 | 0.663305 | 0.192648 |
| Si | Si263 | 0.096815 | 0.159959 | 0.688517 |
| Si | Si264 | 0.595032 | 0.160975 | 0.813031 |
| Si | Si265 | 0.948813 | 0.662003 | 0.326170 |
| Si | Si266 | 0.599492 | 0.318864 | 0.812599 |
| Si | Si267 | 0.944845 | 0.818251 | 0.315118 |
| Si | Si268 | 0.208243 | 0.361294 | 0.835752 |
| Si | Si269 | 0.208664 | 0.125120 | 0.837489 |
| Si | Si270 | 0.708697 | 0.117595 | 0.666145 |
| Si | Si271 | 0.839569 | 0.617575 | 0.171522 |
| Si | Si272 | 0.711695 | 0.357400 | 0.662988 |
| Si | Si273 | 0.837705 | 0.857460 | 0.163955 |
| Si | Si274 | 0.291443 | 0.817382 | 0.547919 |
| Si | Si275 | 0.251344 | 0.318027 | 0.047724 |
| Si | Si276 | 0.294592 | 0.666914 | 0.561302 |
| Si | Si277 | 0.252292 | 0.159765 | 0.049140 |
| Si | Si278 | 0.752366 | 0.166013 | 0.456852 |
| Si | Si279 | 0.797271 | 0.666506 | 0.964236 |
| Si | Si280 | 0.754624 | 0.321160 | 0.450730 |
| Si | Si281 | 0.794074 | 0.821944 | 0.951542 |
| Si | Si282 | 0.139719 | 0.816816 | 0.539092 |
| Si | Si283 | 0.404617 | 0.314467 | 0.035329 |
| Si | Si284 | 0.142936 | 0.662671 | 0.538238 |



|    |       |          |          |          |
|----|-------|----------|----------|----------|
| Si | Si285 | 0.405003 | 0.161646 | 0.036477 |
| Si | Si286 | 0.906120 | 0.166979 | 0.466586 |
| Si | Si287 | 0.643401 | 0.664692 | 0.969365 |
| Si | Si288 | 0.908077 | 0.320545 | 0.465880 |
| Si | Si289 | 0.640673 | 0.819044 | 0.960005 |
| Si | Si290 | 0.091535 | 0.862680 | 0.327842 |
| Si | Si291 | 0.453030 | 0.364706 | 0.829403 |
| Si | Si292 | 0.096702 | 0.620667 | 0.322504 |
| Si | Si293 | 0.449073 | 0.119047 | 0.823550 |
| Si | Si294 | 0.949354 | 0.117577 | 0.676322 |
| Si | Si295 | 0.594321 | 0.614393 | 0.176198 |
| Si | Si296 | 0.953477 | 0.358361 | 0.683867 |
| Si | Si297 | 0.594251 | 0.861100 | 0.174177 |
| Si | Si298 | 0.208882 | 0.823279 | 0.187680 |
| Si | Si299 | 0.331719 | 0.326562 | 0.700151 |
| Si | Si300 | 0.213975 | 0.669415 | 0.197289 |
| Si | Si301 | 0.325483 | 0.171316 | 0.705261 |
| Si | Si302 | 0.828674 | 0.152394 | 0.812471 |
| Si | Si303 | 0.828806 | 0.307744 | 0.796535 |
| Si | Si304 | 0.716724 | 0.808711 | 0.290498 |
| Zn | Zn305 | 0.403873 | 0.742922 | 0.407863 |

**TS-C<sub>6</sub>H<sub>10</sub>-Dehydro-Zn<sup>2+</sup> (Fig. 9a/TS1 in Blue)** Total energy = -1941.42629799 eV

data\_

\_audit\_creation\_method 'Materials Studio'

\_cell\_length\_a 20.357621

\_cell\_length\_b 20.050598

\_cell\_length\_c 13.476578

\_cell\_angle\_alpha 90.000000

\_cell\_angle\_beta 90.000000

\_cell\_angle\_gamma 90.000000

\_symmetry\_space\_group\_name\_H-M 'P1'

loop\_

\_atom\_site\_type\_symbol

\_atom\_site\_label

\_atom\_site\_fract\_x

\_atom\_site\_fract\_y

\_atom\_site\_fract\_z

|   |    |          |          |          |
|---|----|----------|----------|----------|
| H | H1 | 0.471955 | 0.636864 | 0.714502 |
| H | H2 | 0.513417 | 0.551144 | 0.604932 |
| H | H3 | 0.493308 | 0.591807 | 0.420077 |
| H | H4 | 0.575326 | 0.590608 | 0.458394 |
| H | H5 | 0.541995 | 0.699969 | 0.374154 |

|   |     |          |          |          |
|---|-----|----------|----------|----------|
| H | H6  | 0.578278 | 0.708334 | 0.491519 |
| H | H7  | 0.403461 | 0.683831 | 0.478261 |
| H | H8  | 0.485081 | 0.782550 | 0.484605 |
| H | H9  | 0.424562 | 0.737254 | 0.638878 |
| H | H10 | 0.508818 | 0.752130 | 0.642267 |
| C | C11 | 0.483649 | 0.648827 | 0.638216 |
| C | C12 | 0.507296 | 0.601726 | 0.577576 |
| C | C13 | 0.528010 | 0.615006 | 0.472310 |
| C | C14 | 0.534101 | 0.689989 | 0.452979 |
| C | C15 | 0.474707 | 0.728484 | 0.494564 |
| C | C16 | 0.471261 | 0.719803 | 0.608058 |
| O | O17 | 0.516415 | 0.022617 | 0.210954 |
| O | O18 | 0.021977 | 0.536813 | 0.712838 |
| O | O19 | 0.525325 | 0.434493 | 0.211558 |
| O | O20 | 0.017650 | 0.936116 | 0.704077 |
| O | O21 | 0.526126 | 0.951135 | 0.791107 |
| O | O22 | 0.015876 | 0.454053 | 0.289890 |
| O | O23 | 0.514513 | 0.536784 | 0.806487 |
| O | O24 | 0.025779 | 0.034935 | 0.292635 |
| O | O25 | 0.399349 | 0.059268 | 0.278698 |
| O | O26 | 0.139709 | 0.551699 | 0.787380 |
| O | O27 | 0.398933 | 0.424968 | 0.257504 |
| O | O28 | 0.141223 | 0.939877 | 0.758399 |
| O | O29 | 0.644256 | 0.925314 | 0.722863 |
| O | O30 | 0.897746 | 0.422768 | 0.223898 |
| O | O31 | 0.635735 | 0.523834 | 0.742016 |
| O | O32 | 0.900349 | 0.039350 | 0.245121 |
| O | O33 | 0.445815 | 0.111331 | 0.112278 |
| O | O34 | 0.109821 | 0.614609 | 0.621800 |
| O | O35 | 0.447423 | 0.360499 | 0.102152 |
| O | O36 | 0.102929 | 0.860037 | 0.610826 |
| O | O37 | 0.601876 | 0.864618 | 0.885131 |
| O | O38 | 0.942475 | 0.368847 | 0.390218 |
| O | O39 | 0.606581 | 0.616530 | 0.876393 |
| O | O40 | 0.948369 | 0.118435 | 0.386847 |
| O | O41 | 0.406493 | 0.985078 | 0.117654 |
| O | O42 | 0.125697 | 0.483466 | 0.621115 |
| O | O43 | 0.438906 | 0.492925 | 0.096934 |
| O | O44 | 0.104715 | 0.991218 | 0.584450 |
| O | O45 | 0.632789 | 0.993805 | 0.888677 |
| O | O46 | 0.906945 | 0.497278 | 0.382283 |
| O | O47 | 0.603850 | 0.487947 | 0.926682 |
| O | O48 | 0.938097 | 0.987916 | 0.418539 |
| O | O49 | 0.336265 | 0.062027 | 0.448285 |

|   |     |          |          |          |
|---|-----|----------|----------|----------|
| 0 | 050 | 0.212605 | 0.555270 | 0.946271 |
| 0 | 051 | 0.337555 | 0.429685 | 0.428789 |
| 0 | 052 | 0.204483 | 0.942171 | 0.927178 |
| 0 | 053 | 0.707250 | 0.920406 | 0.554708 |
| 0 | 054 | 0.834148 | 0.422151 | 0.056181 |
| 0 | 055 | 0.701486 | 0.541432 | 0.576709 |
| 0 | 056 | 0.838400 | 0.035006 | 0.074532 |
| 0 | 057 | 0.355131 | 0.945696 | 0.357234 |
| 0 | 058 | 0.191110 | 0.438961 | 0.855405 |
| 0 | 059 | 0.348887 | 0.539575 | 0.321469 |
| 0 | 060 | 0.215511 | 0.044667 | 0.804970 |
| 0 | 061 | 0.696880 | 0.036543 | 0.648699 |
| 0 | 062 | 0.851552 | 0.537233 | 0.150460 |
| 0 | 063 | 0.723932 | 0.433710 | 0.685569 |
| 0 | 064 | 0.829831 | 0.932399 | 0.197349 |
| 0 | 065 | 0.270505 | 0.033691 | 0.284906 |
| 0 | 066 | 0.267951 | 0.528508 | 0.772886 |
| 0 | 067 | 0.269639 | 0.440715 | 0.264247 |
| 0 | 068 | 0.270632 | 0.929666 | 0.757885 |
| 0 | 069 | 0.774462 | 0.941806 | 0.719135 |
| 0 | 070 | 0.768740 | 0.448163 | 0.222417 |
| 0 | 071 | 0.763590 | 0.551113 | 0.749970 |
| 0 | 072 | 0.770220 | 0.045780 | 0.240380 |
| 0 | 073 | 0.305775 | 0.127308 | 0.610374 |
| 0 | 074 | 0.229736 | 0.619488 | 0.114107 |
| 0 | 075 | 0.316697 | 0.367382 | 0.594103 |
| 0 | 076 | 0.213085 | 0.860047 | 0.075657 |
| 0 | 077 | 0.735787 | 0.852569 | 0.393583 |
| 0 | 078 | 0.808948 | 0.353474 | 0.893719 |
| 0 | 079 | 0.710595 | 0.611113 | 0.415011 |
| 0 | 080 | 0.830913 | 0.112027 | 0.920172 |
| 0 | 081 | 0.224357 | 0.033845 | 0.541835 |
| 0 | 082 | 0.317468 | 0.529508 | 0.056712 |
| 0 | 083 | 0.217687 | 0.430536 | 0.506626 |
| 0 | 084 | 0.321674 | 0.919341 | 0.002847 |
| 0 | 085 | 0.818143 | 0.946339 | 0.457594 |
| 0 | 086 | 0.723180 | 0.443778 | 0.959479 |
| 0 | 087 | 0.819358 | 0.558159 | 0.498084 |
| 0 | 088 | 0.721209 | 0.058544 | 0.996232 |
| 0 | 089 | 0.337562 | 0.999589 | 0.622820 |
| 0 | 090 | 0.200454 | 0.488704 | 0.114042 |
| 0 | 091 | 0.312724 | 0.500004 | 0.591517 |
| 0 | 092 | 0.236742 | 0.989958 | 0.104424 |
| 0 | 093 | 0.703907 | 0.981137 | 0.380843 |

|   |      |          |          |          |
|---|------|----------|----------|----------|
| 0 | 094  | 0.835370 | 0.482811 | 0.881159 |
| 0 | 095  | 0.734105 | 0.480972 | 0.407641 |
| 0 | 096  | 0.805540 | 0.982583 | 0.900731 |
| 0 | 097  | 0.132487 | 0.120758 | 0.593787 |
| 0 | 098  | 0.407022 | 0.621648 | 0.099740 |
| 0 | 099  | 0.122833 | 0.354713 | 0.584500 |
| 0 | 0100 | 0.421644 | 0.856443 | 0.084742 |
| 0 | 0101 | 0.909135 | 0.858067 | 0.406943 |
| 0 | 0102 | 0.630705 | 0.357677 | 0.909117 |
| 0 | 0103 | 0.919564 | 0.625912 | 0.426254 |
| 0 | 0104 | 0.620951 | 0.124170 | 0.916831 |
| 0 | 0105 | 0.123335 | 0.059452 | 0.420405 |
| 0 | 0106 | 0.414056 | 0.556837 | 0.929496 |
| 0 | 0107 | 0.095869 | 0.439384 | 0.440592 |
| 0 | 0108 | 0.443323 | 0.940899 | 0.939847 |
| 0 | 0109 | 0.916525 | 0.918237 | 0.581262 |
| 0 | 0110 | 0.625527 | 0.414773 | 0.085678 |
| 0 | 0111 | 0.940508 | 0.534848 | 0.562821 |
| 0 | 0112 | 0.600110 | 0.042461 | 0.065124 |
| 0 | 0113 | 0.146131 | 0.032946 | 0.229291 |
| 0 | 0114 | 0.395039 | 0.526179 | 0.739226 |
| 0 | 0115 | 0.140625 | 0.420218 | 0.255942 |
| 0 | 0116 | 0.401222 | 0.924680 | 0.753411 |
| 0 | 0117 | 0.898647 | 0.945883 | 0.773377 |
| 0 | 0118 | 0.644912 | 0.441348 | 0.277638 |
| 0 | 0119 | 0.894886 | 0.555488 | 0.745071 |
| 0 | 0120 | 0.640014 | 0.056054 | 0.252554 |
| 0 | 0121 | 0.106579 | 0.937441 | 0.351242 |
| 0 | 0122 | 0.439951 | 0.435118 | 0.864484 |
| 0 | 0123 | 0.112603 | 0.541402 | 0.317697 |
| 0 | 0124 | 0.434177 | 0.043904 | 0.818058 |
| 0 | 0125 | 0.941562 | 0.038641 | 0.649882 |
| 0 | 0126 | 0.603181 | 0.535203 | 0.154743 |
| 0 | 0127 | 0.936384 | 0.436173 | 0.691941 |
| 0 | 0128 | 0.614471 | 0.936622 | 0.179922 |
| 0 | 0129 | 0.228167 | 0.117537 | 0.148025 |
| 0 | 0130 | 0.321864 | 0.621741 | 0.659614 |
| 0 | 0131 | 0.218523 | 0.357050 | 0.132871 |
| 0 | 0132 | 0.333483 | 0.867081 | 0.613479 |
| 0 | 0133 | 0.819991 | 0.856599 | 0.853290 |
| 0 | 0134 | 0.730364 | 0.356128 | 0.352484 |
| 0 | 0135 | 0.830379 | 0.615734 | 0.886965 |
| 0 | 0136 | 0.715137 | 0.113986 | 0.385726 |
| 0 | 0137 | 0.521496 | 0.846460 | 0.214547 |

|   |      |          |          |          |
|---|------|----------|----------|----------|
| 0 | 0138 | 0.027172 | 0.343542 | 0.720773 |
| 0 | 0139 | 0.516485 | 0.627336 | 0.208620 |
| 0 | 0140 | 0.027904 | 0.128937 | 0.712252 |
| 0 | 0141 | 0.525549 | 0.135813 | 0.781714 |
| 0 | 0142 | 0.018246 | 0.631712 | 0.297112 |
| 0 | 0143 | 0.526524 | 0.348623 | 0.790798 |
| 0 | 0144 | 0.016439 | 0.850052 | 0.294600 |
| 0 | 0145 | 0.402658 | 0.820366 | 0.274294 |
| 0 | 0146 | 0.150749 | 0.325993 | 0.772553 |
| 0 | 0147 | 0.403101 | 0.669236 | 0.285769 |
| 0 | 0148 | 0.145413 | 0.154020 | 0.785514 |
| 0 | 0149 | 0.648663 | 0.147671 | 0.727134 |
| 0 | 0150 | 0.897274 | 0.648088 | 0.234959 |
| 0 | 0151 | 0.644798 | 0.330618 | 0.716237 |
| 0 | 0152 | 0.900687 | 0.823078 | 0.216199 |
| 0 | 0153 | 0.460514 | 0.738738 | 0.145016 |
| 0 | 0154 | 0.092591 | 0.237578 | 0.655784 |
| 0 | 0155 | 0.595211 | 0.241018 | 0.840606 |
| 0 | 0156 | 0.952030 | 0.740819 | 0.349078 |
| 0 | 0157 | 0.330699 | 0.812769 | 0.433323 |
| 0 | 0158 | 0.212253 | 0.323446 | 0.942712 |
| 0 | 0159 | 0.350999 | 0.652114 | 0.469838 |
| 0 | 0160 | 0.208128 | 0.133603 | 0.955483 |
| 0 | 0161 | 0.724083 | 0.155014 | 0.571929 |
| 0 | 0162 | 0.827568 | 0.656419 | 0.074226 |
| 0 | 0163 | 0.708440 | 0.339120 | 0.546399 |
| 0 | 0164 | 0.836694 | 0.843350 | 0.047730 |
| 0 | 0165 | 0.264568 | 0.857524 | 0.254869 |
| 0 | 0166 | 0.278620 | 0.354719 | 0.780770 |
| 0 | 0167 | 0.263281 | 0.654814 | 0.299099 |
| 0 | 0168 | 0.277015 | 0.159833 | 0.797208 |
| 0 | 0169 | 0.776106 | 0.119298 | 0.743917 |
| 0 | 0170 | 0.769652 | 0.619205 | 0.241634 |
| 0 | 0171 | 0.775942 | 0.315706 | 0.709824 |
| 0 | 0172 | 0.769314 | 0.816870 | 0.208687 |
| 0 | 0173 | 0.299153 | 0.741936 | 0.591647 |
| 0 | 0174 | 0.247188 | 0.234701 | 0.074034 |
| 0 | 0175 | 0.746295 | 0.238777 | 0.427044 |
| 0 | 0176 | 0.801150 | 0.740177 | 0.931260 |
| 0 | 0177 | 0.218836 | 0.838845 | 0.527820 |
| 0 | 0178 | 0.328419 | 0.334945 | 0.031816 |
| 0 | 0179 | 0.224439 | 0.639701 | 0.529614 |
| 0 | 0180 | 0.329678 | 0.136002 | 0.026777 |
| 0 | 0181 | 0.832029 | 0.141906 | 0.463858 |

|    |       |          |          |          |
|----|-------|----------|----------|----------|
| O  | O182  | 0.716525 | 0.642681 | 0.974580 |
| O  | O183  | 0.829494 | 0.336819 | 0.477780 |
| O  | O184  | 0.716955 | 0.838349 | 0.971098 |
| O  | O185  | 0.139943 | 0.737008 | 0.571808 |
| O  | O186  | 0.410998 | 0.235175 | 0.074890 |
| O  | O187  | 0.915990 | 0.242820 | 0.429808 |
| O  | O188  | 0.632646 | 0.740279 | 0.927264 |
| O  | O189  | 0.109962 | 0.816321 | 0.423183 |
| O  | O190  | 0.434103 | 0.310689 | 0.920338 |
| O  | O191  | 0.110662 | 0.647887 | 0.433058 |
| O  | O192  | 0.440605 | 0.153289 | 0.927231 |
| O  | O193  | 0.938638 | 0.159470 | 0.575354 |
| O  | O194  | 0.602104 | 0.652799 | 0.066563 |
| O  | O195  | 0.941443 | 0.328362 | 0.576080 |
| O  | O196  | 0.606955 | 0.825392 | 0.072250 |
| O  | O197  | 0.137136 | 0.834765 | 0.231383 |
| O  | O198  | 0.403935 | 0.341755 | 0.733876 |
| O  | O199  | 0.138553 | 0.660072 | 0.241082 |
| O  | O200  | 0.401462 | 0.159122 | 0.738445 |
| O  | O201  | 0.904080 | 0.140819 | 0.763085 |
| O  | O202  | 0.641465 | 0.642657 | 0.254302 |
| O  | O203  | 0.901997 | 0.319195 | 0.763503 |
| O  | O204  | 0.643903 | 0.820121 | 0.261607 |
| O  | O205  | 0.223731 | 0.745146 | 0.166184 |
| O  | O206  | 0.318686 | 0.250130 | 0.671939 |
| O  | O207  | 0.820594 | 0.228895 | 0.837617 |
| O  | O208  | 0.724082 | 0.728493 | 0.335022 |
| Al | Al209 | 0.333423 | 0.865899 | 0.325999 |
| Al | Al210 | 0.337054 | 0.622886 | 0.339655 |
| Si | Si211 | 0.711705 | 0.650545 | 0.310031 |
| Si | Si212 | 0.442275 | 0.044641 | 0.180110 |
| Si | Si213 | 0.098721 | 0.546616 | 0.684647 |
| Si | Si214 | 0.451339 | 0.428262 | 0.167708 |
| Si | Si215 | 0.092548 | 0.931830 | 0.664323 |
| Si | Si216 | 0.600944 | 0.933974 | 0.822994 |
| Si | Si217 | 0.941506 | 0.435687 | 0.322739 |
| Si | Si218 | 0.590968 | 0.541418 | 0.838034 |
| Si | Si219 | 0.952375 | 0.045175 | 0.335658 |
| Si | Si220 | 0.340472 | 0.023596 | 0.341933 |
| Si | Si221 | 0.202984 | 0.518382 | 0.840807 |
| Si | Si222 | 0.338674 | 0.460424 | 0.317115 |
| Si | Si223 | 0.208059 | 0.964158 | 0.812319 |
| Si | Si224 | 0.705864 | 0.956482 | 0.662267 |
| Si | Si225 | 0.837883 | 0.457755 | 0.163897 |

|    |       |          |          |          |
|----|-------|----------|----------|----------|
| Si | Si226 | 0.706265 | 0.512654 | 0.688856 |
| Si | Si227 | 0.834817 | 0.013121 | 0.189716 |
| Si | Si228 | 0.300997 | 0.055707 | 0.555230 |
| Si | Si229 | 0.239572 | 0.548958 | 0.059046 |
| Si | Si230 | 0.296035 | 0.431930 | 0.530414 |
| Si | Si231 | 0.243742 | 0.927529 | 0.029232 |
| Si | Si232 | 0.741454 | 0.924966 | 0.446352 |
| Si | Si233 | 0.800534 | 0.425212 | 0.947386 |
| Si | Si234 | 0.741832 | 0.547962 | 0.473550 |
| Si | Si235 | 0.798756 | 0.047055 | 0.972309 |
| Si | Si236 | 0.146606 | 0.051602 | 0.534994 |
| Si | Si237 | 0.393993 | 0.550067 | 0.045957 |
| Si | Si238 | 0.140897 | 0.427022 | 0.537850 |
| Si | Si239 | 0.397641 | 0.926437 | 0.035878 |
| Si | Si240 | 0.895614 | 0.927299 | 0.465806 |
| Si | Si241 | 0.645855 | 0.425524 | 0.970310 |
| Si | Si242 | 0.896349 | 0.553713 | 0.467413 |
| Si | Si243 | 0.644072 | 0.054545 | 0.966782 |
| Si | Si244 | 0.100461 | 0.016206 | 0.323883 |
| Si | Si245 | 0.440823 | 0.513646 | 0.835609 |
| Si | Si246 | 0.091520 | 0.463496 | 0.325449 |
| Si | Si247 | 0.451050 | 0.965120 | 0.825362 |
| Si | Si248 | 0.943875 | 0.959686 | 0.676727 |
| Si | Si249 | 0.599269 | 0.456290 | 0.181929 |
| Si | Si250 | 0.948551 | 0.515642 | 0.679048 |
| Si | Si251 | 0.592509 | 0.014845 | 0.177737 |
| Si | Si252 | 0.221101 | 0.042697 | 0.192166 |
| Si | Si253 | 0.324186 | 0.543196 | 0.691626 |
| Si | Si254 | 0.208051 | 0.426816 | 0.191736 |
| Si | Si255 | 0.334998 | 0.931172 | 0.686916 |
| Si | Si256 | 0.824565 | 0.932250 | 0.811394 |
| Si | Si257 | 0.719977 | 0.432025 | 0.314421 |
| Si | Si258 | 0.830680 | 0.550767 | 0.815755 |
| Si | Si259 | 0.707866 | 0.049120 | 0.315144 |
| Si | Si260 | 0.451614 | 0.816179 | 0.177584 |
| Si | Si261 | 0.098246 | 0.315750 | 0.683674 |
| Si | Si262 | 0.446685 | 0.663212 | 0.183781 |
| Si | Si263 | 0.099712 | 0.160041 | 0.686941 |
| Si | Si264 | 0.597462 | 0.162136 | 0.816412 |
| Si | Si265 | 0.947076 | 0.661842 | 0.326380 |
| Si | Si266 | 0.599328 | 0.319407 | 0.813915 |
| Si | Si267 | 0.944914 | 0.818140 | 0.316652 |
| Si | Si268 | 0.208153 | 0.360967 | 0.836954 |
| Si | Si269 | 0.210851 | 0.122731 | 0.836224 |

|    |       |          |          |          |
|----|-------|----------|----------|----------|
| Si | Si270 | 0.711553 | 0.114341 | 0.673473 |
| Si | Si271 | 0.836624 | 0.614846 | 0.175968 |
| Si | Si272 | 0.712688 | 0.354747 | 0.664472 |
| Si | Si273 | 0.834794 | 0.854242 | 0.167027 |
| Si | Si274 | 0.294871 | 0.815971 | 0.541757 |
| Si | Si275 | 0.251703 | 0.312871 | 0.045988 |
| Si | Si276 | 0.297333 | 0.663429 | 0.564025 |
| Si | Si277 | 0.253273 | 0.155940 | 0.049979 |
| Si | Si278 | 0.754523 | 0.161987 | 0.461508 |
| Si | Si279 | 0.793783 | 0.663451 | 0.966109 |
| Si | Si280 | 0.753626 | 0.317340 | 0.451867 |
| Si | Si281 | 0.793883 | 0.819219 | 0.952076 |
| Si | Si282 | 0.142404 | 0.813616 | 0.532961 |
| Si | Si283 | 0.404939 | 0.310814 | 0.032921 |
| Si | Si284 | 0.145968 | 0.659505 | 0.538513 |
| Si | Si285 | 0.406384 | 0.158728 | 0.035416 |
| Si | Si286 | 0.908766 | 0.165445 | 0.463966 |
| Si | Si287 | 0.639560 | 0.662885 | 0.961257 |
| Si | Si288 | 0.907353 | 0.319118 | 0.468446 |
| Si | Si289 | 0.639963 | 0.817189 | 0.963571 |
| Si | Si290 | 0.093216 | 0.859679 | 0.323994 |
| Si | Si291 | 0.451214 | 0.358848 | 0.827065 |
| Si | Si292 | 0.095271 | 0.620415 | 0.322157 |
| Si | Si293 | 0.450330 | 0.123107 | 0.816784 |
| Si | Si294 | 0.953030 | 0.116783 | 0.675389 |
| Si | Si295 | 0.591273 | 0.614101 | 0.170992 |
| Si | Si296 | 0.951646 | 0.356854 | 0.687668 |
| Si | Si297 | 0.597405 | 0.857665 | 0.181445 |
| Si | Si298 | 0.210445 | 0.824066 | 0.184310 |
| Si | Si299 | 0.329368 | 0.328121 | 0.696341 |
| Si | Si300 | 0.215048 | 0.669520 | 0.206898 |
| Si | Si301 | 0.326227 | 0.173036 | 0.704164 |
| Si | Si302 | 0.832996 | 0.150724 | 0.814834 |
| Si | Si303 | 0.827421 | 0.305409 | 0.801132 |
| Si | Si304 | 0.718246 | 0.805403 | 0.299835 |
| Zn | Zn305 | 0.410502 | 0.753584 | 0.383736 |

**M-C<sub>6</sub>H<sub>9</sub>Zn-OH-Zn<sup>2+</sup> (Fig. 9a/M2 in Blue)** Total energy = -1942.56228246 eV

data\_

|                        |                    |
|------------------------|--------------------|
| _audit_creation_method | 'Materials Studio' |
| _cell_length_a         | 20.357621          |
| _cell_length_b         | 20.050598          |
| _cell_length_c         | 13.476578          |



```

_cell_angle_alpha      90.000000
_cell_angle_beta      90.000000
_cell_angle_gamma     90.000000
_symmetry_space_group_name_H-M  'P1'
loop_
_atom_site_type_symbol
_atom_site_label
_atom_site_fract_x
_atom_site_fract_y
_atom_site_fract_z
  H      H1          0.441949      0.669611      0.686537
  H      H2          0.480944      0.580723      0.580749
  H      H3          0.514593      0.627399      0.406698
  H      H4          0.580726      0.609637      0.484560
  H      H5          0.581123      0.725462      0.393243
  H      H6          0.604677      0.722032      0.518638
  H      H7          0.388377      0.639985      0.500743
  H      H8          0.530975      0.817129      0.491955
  H      H9          0.445995      0.785548      0.625792
  H      H10         0.527495      0.767690      0.655668
  C      C11         0.471106      0.681632      0.621373
  C      C12         0.492858      0.632227      0.562180
  C      C13         0.538499      0.643148      0.475756
  C      C14         0.562642      0.715660      0.467904
  C      C15         0.510004      0.766740      0.497164
  C      C16         0.487435      0.753892      0.604149
  O      O17         0.516691      0.022704      0.210849
  O      O18         0.021536      0.533529      0.716333
  O      O19         0.525386      0.436040      0.211330
  O      O20         0.019024      0.936333      0.703660
  O      O21         0.527123      0.950754      0.789269
  O      O22         0.016190      0.452268      0.288710
  O      O23         0.515035      0.543016      0.803151
  O      O24         0.026123      0.036256      0.292492
  O      O25         0.398982      0.055343      0.278366
  O      O26         0.140708      0.552399      0.786595
  O      O27         0.400157      0.427135      0.261977
  O      O28         0.142882      0.937892      0.756965
  O      O29         0.646223      0.923888      0.725176
  O      O30         0.898134      0.422828      0.221366
  O      O31         0.635006      0.526335      0.737289
  O      O32         0.900647      0.042160      0.244830
  O      O33         0.444618      0.112066      0.115133
  O      O34         0.103860      0.616977      0.626114

```

|   |     |          |          |          |
|---|-----|----------|----------|----------|
| 0 | 035 | 0.446358 | 0.360343 | 0.106405 |
| 0 | 036 | 0.103793 | 0.862163 | 0.605682 |
| 0 | 037 | 0.601627 | 0.865378 | 0.887656 |
| 0 | 038 | 0.941441 | 0.367041 | 0.386626 |
| 0 | 039 | 0.609858 | 0.617113 | 0.876329 |
| 0 | 040 | 0.948870 | 0.117272 | 0.390798 |
| 0 | 041 | 0.408529 | 0.984728 | 0.113775 |
| 0 | 042 | 0.125921 | 0.486636 | 0.618621 |
| 0 | 043 | 0.437065 | 0.492363 | 0.097348 |
| 0 | 044 | 0.105524 | 0.993492 | 0.585776 |
| 0 | 045 | 0.632391 | 0.994845 | 0.888288 |
| 0 | 046 | 0.908200 | 0.496058 | 0.381946 |
| 0 | 047 | 0.603157 | 0.487735 | 0.920928 |
| 0 | 048 | 0.938243 | 0.986084 | 0.415349 |
| 0 | 049 | 0.337362 | 0.060139 | 0.448069 |
| 0 | 050 | 0.206636 | 0.553964 | 0.952259 |
| 0 | 051 | 0.338993 | 0.436589 | 0.433292 |
| 0 | 052 | 0.203976 | 0.943231 | 0.928247 |
| 0 | 053 | 0.706813 | 0.921455 | 0.554846 |
| 0 | 054 | 0.834322 | 0.422874 | 0.053299 |
| 0 | 055 | 0.701368 | 0.540733 | 0.572462 |
| 0 | 056 | 0.839404 | 0.034703 | 0.073496 |
| 0 | 057 | 0.351475 | 0.942774 | 0.357109 |
| 0 | 058 | 0.187186 | 0.438060 | 0.857521 |
| 0 | 059 | 0.342416 | 0.541142 | 0.313294 |
| 0 | 060 | 0.213388 | 0.044845 | 0.803895 |
| 0 | 061 | 0.696089 | 0.036486 | 0.651964 |
| 0 | 062 | 0.851899 | 0.537179 | 0.149733 |
| 0 | 063 | 0.721554 | 0.433518 | 0.684279 |
| 0 | 064 | 0.833571 | 0.933057 | 0.198211 |
| 0 | 065 | 0.269678 | 0.034117 | 0.286155 |
| 0 | 066 | 0.269375 | 0.526034 | 0.785876 |
| 0 | 067 | 0.270444 | 0.433841 | 0.268513 |
| 0 | 068 | 0.272425 | 0.930910 | 0.761911 |
| 0 | 069 | 0.776167 | 0.941965 | 0.717318 |
| 0 | 070 | 0.769083 | 0.446759 | 0.219514 |
| 0 | 071 | 0.763109 | 0.551004 | 0.745827 |
| 0 | 072 | 0.770488 | 0.045245 | 0.238672 |
| 0 | 073 | 0.309236 | 0.126769 | 0.610075 |
| 0 | 074 | 0.229965 | 0.617774 | 0.119440 |
| 0 | 075 | 0.315306 | 0.365525 | 0.591107 |
| 0 | 076 | 0.215166 | 0.860262 | 0.075603 |
| 0 | 077 | 0.735928 | 0.852134 | 0.395200 |
| 0 | 078 | 0.808988 | 0.354260 | 0.891282 |

|   |      |          |          |          |
|---|------|----------|----------|----------|
| 0 | 079  | 0.715286 | 0.611914 | 0.412482 |
| 0 | 080  | 0.829484 | 0.113167 | 0.920809 |
| 0 | 081  | 0.225096 | 0.035456 | 0.542676 |
| 0 | 082  | 0.317060 | 0.530838 | 0.050947 |
| 0 | 083  | 0.217541 | 0.432289 | 0.505789 |
| 0 | 084  | 0.322360 | 0.920172 | 0.000299 |
| 0 | 085  | 0.818647 | 0.945501 | 0.459076 |
| 0 | 086  | 0.722292 | 0.443390 | 0.957821 |
| 0 | 087  | 0.820733 | 0.555099 | 0.499019 |
| 0 | 088  | 0.721379 | 0.057253 | 0.997657 |
| 0 | 089  | 0.337534 | 0.997577 | 0.621845 |
| 0 | 090  | 0.203227 | 0.487145 | 0.119437 |
| 0 | 091  | 0.310601 | 0.497804 | 0.601824 |
| 0 | 092  | 0.238335 | 0.989575 | 0.105509 |
| 0 | 093  | 0.705102 | 0.980811 | 0.380029 |
| 0 | 094  | 0.833940 | 0.484118 | 0.879302 |
| 0 | 095  | 0.734724 | 0.481185 | 0.403494 |
| 0 | 096  | 0.806168 | 0.983735 | 0.898753 |
| 0 | 097  | 0.132796 | 0.122845 | 0.591398 |
| 0 | 098  | 0.405437 | 0.621142 | 0.107018 |
| 0 | 099  | 0.124380 | 0.356633 | 0.588199 |
| 0 | 0100 | 0.420125 | 0.854891 | 0.084886 |
| 0 | 0101 | 0.908992 | 0.856325 | 0.407862 |
| 0 | 0102 | 0.629579 | 0.357433 | 0.906859 |
| 0 | 0103 | 0.918937 | 0.625147 | 0.424832 |
| 0 | 0104 | 0.622875 | 0.125448 | 0.917600 |
| 0 | 0105 | 0.124632 | 0.059426 | 0.419450 |
| 0 | 0106 | 0.417556 | 0.560498 | 0.932807 |
| 0 | 0107 | 0.094833 | 0.437820 | 0.441504 |
| 0 | 0108 | 0.444535 | 0.937471 | 0.937741 |
| 0 | 0109 | 0.918280 | 0.918241 | 0.580550 |
| 0 | 0110 | 0.623450 | 0.415543 | 0.082114 |
| 0 | 0111 | 0.943084 | 0.535364 | 0.561829 |
| 0 | 0112 | 0.599728 | 0.043330 | 0.064825 |
| 0 | 0113 | 0.146045 | 0.033084 | 0.227825 |
| 0 | 0114 | 0.395245 | 0.533885 | 0.741378 |
| 0 | 0115 | 0.140887 | 0.418530 | 0.258087 |
| 0 | 0116 | 0.402694 | 0.923114 | 0.750887 |
| 0 | 0117 | 0.900044 | 0.946599 | 0.772676 |
| 0 | 0118 | 0.645391 | 0.439931 | 0.274398 |
| 0 | 0119 | 0.894281 | 0.555702 | 0.742365 |
| 0 | 0120 | 0.640376 | 0.055479 | 0.252110 |
| 0 | 0121 | 0.105709 | 0.937795 | 0.350053 |
| 0 | 0122 | 0.441578 | 0.439854 | 0.861452 |

|   |      |          |          |          |
|---|------|----------|----------|----------|
| 0 | 0123 | 0.112215 | 0.539998 | 0.319302 |
| 0 | 0124 | 0.433972 | 0.042200 | 0.818593 |
| 0 | 0125 | 0.942933 | 0.038885 | 0.648618 |
| 0 | 0126 | 0.604627 | 0.535660 | 0.153597 |
| 0 | 0127 | 0.933759 | 0.435903 | 0.689278 |
| 0 | 0128 | 0.614617 | 0.936630 | 0.177940 |
| 0 | 0129 | 0.228892 | 0.117112 | 0.146828 |
| 0 | 0130 | 0.312815 | 0.620772 | 0.665729 |
| 0 | 0131 | 0.216895 | 0.355155 | 0.133197 |
| 0 | 0132 | 0.330531 | 0.864352 | 0.617797 |
| 0 | 0133 | 0.821654 | 0.857596 | 0.853135 |
| 0 | 0134 | 0.730642 | 0.355615 | 0.351377 |
| 0 | 0135 | 0.829253 | 0.617295 | 0.881620 |
| 0 | 0136 | 0.715604 | 0.113716 | 0.384203 |
| 0 | 0137 | 0.521407 | 0.846779 | 0.212000 |
| 0 | 0138 | 0.025965 | 0.344832 | 0.719613 |
| 0 | 0139 | 0.517568 | 0.626754 | 0.209237 |
| 0 | 0140 | 0.028655 | 0.129232 | 0.711698 |
| 0 | 0141 | 0.526889 | 0.132519 | 0.782640 |
| 0 | 0142 | 0.016684 | 0.628870 | 0.293659 |
| 0 | 0143 | 0.524986 | 0.349757 | 0.788854 |
| 0 | 0144 | 0.015159 | 0.850673 | 0.292846 |
| 0 | 0145 | 0.404111 | 0.820631 | 0.276217 |
| 0 | 0146 | 0.147912 | 0.324631 | 0.776177 |
| 0 | 0147 | 0.407009 | 0.667650 | 0.294410 |
| 0 | 0148 | 0.146403 | 0.155833 | 0.783325 |
| 0 | 0149 | 0.649758 | 0.149232 | 0.728159 |
| 0 | 0150 | 0.896236 | 0.649004 | 0.234315 |
| 0 | 0151 | 0.643022 | 0.329760 | 0.714243 |
| 0 | 0152 | 0.899092 | 0.820734 | 0.217416 |
| 0 | 0153 | 0.460189 | 0.737702 | 0.147401 |
| 0 | 0154 | 0.091313 | 0.238677 | 0.654358 |
| 0 | 0155 | 0.592036 | 0.241085 | 0.839259 |
| 0 | 0156 | 0.953896 | 0.739804 | 0.348601 |
| 0 | 0157 | 0.335226 | 0.811048 | 0.437422 |
| 0 | 0158 | 0.213034 | 0.322665 | 0.942508 |
| 0 | 0159 | 0.342695 | 0.640275 | 0.475123 |
| 0 | 0160 | 0.208163 | 0.133827 | 0.954263 |
| 0 | 0161 | 0.722897 | 0.153900 | 0.570882 |
| 0 | 0162 | 0.831657 | 0.655820 | 0.069663 |
| 0 | 0163 | 0.707601 | 0.338931 | 0.544973 |
| 0 | 0164 | 0.837163 | 0.844196 | 0.047888 |
| 0 | 0165 | 0.263299 | 0.851785 | 0.258127 |
| 0 | 0166 | 0.275139 | 0.355853 | 0.777172 |

|    |       |          |          |          |
|----|-------|----------|----------|----------|
| 0  | 0167  | 0.263387 | 0.661130 | 0.300592 |
| 0  | 0168  | 0.277941 | 0.158398 | 0.796365 |
| 0  | 0169  | 0.777290 | 0.119622 | 0.741981 |
| 0  | 0170  | 0.768868 | 0.620516 | 0.234505 |
| 0  | 0171  | 0.774175 | 0.315547 | 0.709038 |
| 0  | 0172  | 0.767716 | 0.820432 | 0.207710 |
| 0  | 0173  | 0.296773 | 0.739228 | 0.590685 |
| 0  | 0174  | 0.247801 | 0.234057 | 0.073727 |
| 0  | 0175  | 0.746460 | 0.238258 | 0.427057 |
| 0  | 0176  | 0.802012 | 0.741319 | 0.930425 |
| 0  | 0177  | 0.219086 | 0.836014 | 0.522824 |
| 0  | 0178  | 0.327990 | 0.335615 | 0.033767 |
| 0  | 0179  | 0.217359 | 0.638567 | 0.530703 |
| 0  | 0180  | 0.330118 | 0.136110 | 0.024518 |
| 0  | 0181  | 0.831680 | 0.140855 | 0.464993 |
| 0  | 0182  | 0.718125 | 0.643893 | 0.977242 |
| 0  | 0183  | 0.829149 | 0.336508 | 0.477789 |
| 0  | 0184  | 0.717899 | 0.839725 | 0.969388 |
| 0  | 0185  | 0.135829 | 0.737965 | 0.570113 |
| 0  | 0186  | 0.411405 | 0.235668 | 0.072051 |
| 0  | 0187  | 0.914966 | 0.241773 | 0.429397 |
| 0  | 0188  | 0.634244 | 0.740801 | 0.926938 |
| 0  | 0189  | 0.109640 | 0.816047 | 0.419026 |
| 0  | 0190  | 0.433549 | 0.315571 | 0.921200 |
| 0  | 0191  | 0.103851 | 0.646150 | 0.435275 |
| 0  | 0192  | 0.442660 | 0.151450 | 0.928485 |
| 0  | 0193  | 0.937405 | 0.160571 | 0.577744 |
| 0  | 0194  | 0.603103 | 0.653530 | 0.066901 |
| 0  | 0195  | 0.942130 | 0.328522 | 0.573228 |
| 0  | 0196  | 0.609457 | 0.824010 | 0.073709 |
| 0  | 0197  | 0.135477 | 0.836647 | 0.227117 |
| 0  | 0198  | 0.401335 | 0.346056 | 0.735162 |
| 0  | 0199  | 0.138075 | 0.659140 | 0.245218 |
| 0  | 0200  | 0.403000 | 0.158729 | 0.740404 |
| 0  | 0201  | 0.905062 | 0.139435 | 0.765650 |
| 0  | 0202  | 0.641766 | 0.642610 | 0.255498 |
| 0  | 0203  | 0.900860 | 0.318563 | 0.759867 |
| 0  | 0204  | 0.643167 | 0.821228 | 0.264123 |
| 0  | 0205  | 0.218679 | 0.744247 | 0.160973 |
| 0  | 0206  | 0.320282 | 0.249995 | 0.674439 |
| 0  | 0207  | 0.820681 | 0.229104 | 0.836288 |
| 0  | 0208  | 0.725614 | 0.729140 | 0.331899 |
| Al | Al209 | 0.332955 | 0.861439 | 0.327432 |
| Al | Al210 | 0.336434 | 0.625060 | 0.335037 |

|    |       |          |          |          |
|----|-------|----------|----------|----------|
| Si | Si211 | 0.713124 | 0.651165 | 0.307389 |
| Si | Si212 | 0.442329 | 0.043712 | 0.179580 |
| Si | Si213 | 0.097382 | 0.547083 | 0.686113 |
| Si | Si214 | 0.450909 | 0.429021 | 0.169835 |
| Si | Si215 | 0.093747 | 0.932577 | 0.662998 |
| Si | Si216 | 0.601555 | 0.933981 | 0.823664 |
| Si | Si217 | 0.941571 | 0.434547 | 0.320774 |
| Si | Si218 | 0.591653 | 0.543513 | 0.834915 |
| Si | Si219 | 0.952664 | 0.045324 | 0.335752 |
| Si | Si220 | 0.339617 | 0.021013 | 0.342013 |
| Si | Si221 | 0.200675 | 0.517414 | 0.845987 |
| Si | Si222 | 0.337868 | 0.461493 | 0.318241 |
| Si | Si223 | 0.208191 | 0.964296 | 0.812993 |
| Si | Si224 | 0.706520 | 0.956460 | 0.663195 |
| Si | Si225 | 0.838172 | 0.457662 | 0.161544 |
| Si | Si226 | 0.705471 | 0.512833 | 0.685168 |
| Si | Si227 | 0.836060 | 0.013811 | 0.189133 |
| Si | Si228 | 0.302335 | 0.055123 | 0.555195 |
| Si | Si229 | 0.239136 | 0.548177 | 0.061975 |
| Si | Si230 | 0.295435 | 0.432771 | 0.532810 |
| Si | Si231 | 0.244768 | 0.927953 | 0.028868 |
| Si | Si232 | 0.741832 | 0.924868 | 0.446986 |
| Si | Si233 | 0.799859 | 0.425830 | 0.945123 |
| Si | Si234 | 0.743430 | 0.547311 | 0.470844 |
| Si | Si235 | 0.798878 | 0.047195 | 0.972161 |
| Si | Si236 | 0.147460 | 0.053069 | 0.534425 |
| Si | Si237 | 0.393976 | 0.551457 | 0.047710 |
| Si | Si238 | 0.140922 | 0.428216 | 0.538328 |
| Si | Si239 | 0.398424 | 0.925036 | 0.034135 |
| Si | Si240 | 0.896154 | 0.926260 | 0.465438 |
| Si | Si241 | 0.644704 | 0.425701 | 0.967065 |
| Si | Si242 | 0.897581 | 0.552587 | 0.466887 |
| Si | Si243 | 0.644357 | 0.055036 | 0.967106 |
| Si | Si244 | 0.100720 | 0.016698 | 0.323007 |
| Si | Si245 | 0.442322 | 0.519007 | 0.836057 |
| Si | Si246 | 0.091286 | 0.461935 | 0.326263 |
| Si | Si247 | 0.451881 | 0.963428 | 0.824043 |
| Si | Si248 | 0.945310 | 0.959968 | 0.675914 |
| Si | Si249 | 0.599265 | 0.456720 | 0.179888 |
| Si | Si250 | 0.948234 | 0.515052 | 0.678195 |
| Si | Si251 | 0.592589 | 0.014819 | 0.177068 |
| Si | Si252 | 0.221391 | 0.042683 | 0.192126 |
| Si | Si253 | 0.321411 | 0.542890 | 0.699818 |
| Si | Si254 | 0.208686 | 0.424041 | 0.194811 |

|    |       |          |          |          |
|----|-------|----------|----------|----------|
| Si | Si255 | 0.335048 | 0.929962 | 0.687753 |
| Si | Si256 | 0.825888 | 0.933006 | 0.810289 |
| Si | Si257 | 0.720347 | 0.431164 | 0.311681 |
| Si | Si258 | 0.829759 | 0.551432 | 0.812421 |
| Si | Si259 | 0.708445 | 0.048677 | 0.314007 |
| Si | Si260 | 0.451115 | 0.815397 | 0.178206 |
| Si | Si261 | 0.097210 | 0.316412 | 0.684612 |
| Si | Si262 | 0.446962 | 0.662822 | 0.189967 |
| Si | Si263 | 0.099965 | 0.161214 | 0.685397 |
| Si | Si264 | 0.597722 | 0.162078 | 0.816877 |
| Si | Si265 | 0.946715 | 0.661068 | 0.325082 |
| Si | Si266 | 0.597372 | 0.319384 | 0.812040 |
| Si | Si267 | 0.944597 | 0.817080 | 0.316662 |
| Si | Si268 | 0.206084 | 0.360534 | 0.837604 |
| Si | Si269 | 0.210814 | 0.122983 | 0.834955 |
| Si | Si270 | 0.711663 | 0.114494 | 0.673845 |
| Si | Si271 | 0.837237 | 0.615148 | 0.172683 |
| Si | Si272 | 0.710986 | 0.354415 | 0.663166 |
| Si | Si273 | 0.835004 | 0.854904 | 0.167242 |
| Si | Si274 | 0.295016 | 0.813958 | 0.541466 |
| Si | Si275 | 0.251597 | 0.312227 | 0.046435 |
| Si | Si276 | 0.288961 | 0.660910 | 0.568963 |
| Si | Si277 | 0.253725 | 0.155508 | 0.048680 |
| Si | Si278 | 0.754307 | 0.161345 | 0.461212 |
| Si | Si279 | 0.795098 | 0.664339 | 0.963978 |
| Si | Si280 | 0.753371 | 0.316956 | 0.451185 |
| Si | Si281 | 0.794841 | 0.820320 | 0.951544 |
| Si | Si282 | 0.141807 | 0.813930 | 0.528900 |
| Si | Si283 | 0.404692 | 0.312096 | 0.033832 |
| Si | Si284 | 0.139163 | 0.659940 | 0.539898 |
| Si | Si285 | 0.406796 | 0.158626 | 0.035322 |
| Si | Si286 | 0.908258 | 0.164830 | 0.465732 |
| Si | Si287 | 0.641205 | 0.663647 | 0.962185 |
| Si | Si288 | 0.906839 | 0.318355 | 0.466693 |
| Si | Si289 | 0.641094 | 0.817576 | 0.964043 |
| Si | Si290 | 0.092176 | 0.860359 | 0.320988 |
| Si | Si291 | 0.450330 | 0.362670 | 0.826587 |
| Si | Si292 | 0.093192 | 0.618619 | 0.322930 |
| Si | Si293 | 0.451429 | 0.121216 | 0.817854 |
| Si | Si294 | 0.953497 | 0.116872 | 0.676286 |
| Si | Si295 | 0.592075 | 0.614451 | 0.171131 |
| Si | Si296 | 0.950564 | 0.356905 | 0.685123 |
| Si | Si297 | 0.597591 | 0.857651 | 0.181385 |
| Si | Si298 | 0.209265 | 0.823249 | 0.183003 |

|    |       |          |          |          |
|----|-------|----------|----------|----------|
| Si | Si299 | 0.327907 | 0.328740 | 0.695844 |
| Si | Si300 | 0.213740 | 0.670264 | 0.208335 |
| Si | Si301 | 0.327997 | 0.172497 | 0.704776 |
| Si | Si302 | 0.833286 | 0.150808 | 0.814764 |
| Si | Si303 | 0.826583 | 0.305499 | 0.799149 |
| Si | Si304 | 0.718060 | 0.806488 | 0.299854 |
| Zn | Zn305 | 0.435565 | 0.773466 | 0.402855 |

**TS-C<sub>6</sub>H<sub>9</sub>Zn-HTransfer-Concerted-Zn<sup>2+</sup> (Fig. 9a/TS2 in Blue)**

Total energy = -1941.16198568 eV

data\_

\_audit\_creation\_method 'Materials Studio'

\_cell\_length\_a 20.357621

\_cell\_length\_b 20.050598

\_cell\_length\_c 13.476578

\_cell\_angle\_alpha 90.000000

\_cell\_angle\_beta 90.000000

\_cell\_angle\_gamma 90.000000

\_symmetry\_space\_group\_name\_H-M 'P1'

loop\_

\_atom\_site\_type\_symbol

\_atom\_site\_label

\_atom\_site\_fract\_x

\_atom\_site\_fract\_y

\_atom\_site\_fract\_z

|   |     |          |          |          |
|---|-----|----------|----------|----------|
| H | H1  | 0.433911 | 0.700892 | 0.621597 |
| H | H2  | 0.448247 | 0.639644 | 0.519072 |
| H | H3  | 0.471376 | 0.798160 | 0.544609 |
| H | H4  | 0.407057 | 0.634804 | 0.501160 |
| H | H5  | 0.632273 | 0.670680 | 0.652338 |
| H | H6  | 0.523532 | 0.620381 | 0.662398 |
| H | H7  | 0.562012 | 0.805015 | 0.423045 |
| H | H8  | 0.563684 | 0.717871 | 0.407806 |
| H | H9  | 0.608113 | 0.795358 | 0.592158 |
| H | H10 | 0.656344 | 0.746258 | 0.513620 |
| C | C11 | 0.475535 | 0.696429 | 0.571074 |
| C | C12 | 0.484980 | 0.753056 | 0.502543 |
| C | C13 | 0.592513 | 0.691019 | 0.607772 |
| C | C14 | 0.532351 | 0.663092 | 0.615073 |
| C | C15 | 0.555433 | 0.757766 | 0.462173 |
| C | C16 | 0.606777 | 0.750566 | 0.544694 |
| O | O17 | 0.516308 | 0.024976 | 0.206624 |
| O | O18 | 0.024070 | 0.534276 | 0.720672 |



|   |     |          |          |          |
|---|-----|----------|----------|----------|
| 0 | 019 | 0.525888 | 0.436710 | 0.211496 |
| 0 | 020 | 0.019299 | 0.939195 | 0.699716 |
| 0 | 021 | 0.527651 | 0.950265 | 0.785087 |
| 0 | 022 | 0.018190 | 0.452147 | 0.289852 |
| 0 | 023 | 0.517674 | 0.543243 | 0.804695 |
| 0 | 024 | 0.025013 | 0.038302 | 0.286536 |
| 0 | 025 | 0.397050 | 0.056028 | 0.268395 |
| 0 | 026 | 0.144205 | 0.559775 | 0.783698 |
| 0 | 027 | 0.402652 | 0.428591 | 0.270765 |
| 0 | 028 | 0.144304 | 0.937727 | 0.747073 |
| 0 | 029 | 0.646182 | 0.924382 | 0.719200 |
| 0 | 030 | 0.898964 | 0.425887 | 0.224598 |
| 0 | 031 | 0.638322 | 0.531491 | 0.742453 |
| 0 | 032 | 0.899220 | 0.045248 | 0.241800 |
| 0 | 033 | 0.444657 | 0.111137 | 0.104741 |
| 0 | 034 | 0.099616 | 0.621529 | 0.624875 |
| 0 | 035 | 0.444219 | 0.359424 | 0.114075 |
| 0 | 036 | 0.099791 | 0.864894 | 0.595436 |
| 0 | 037 | 0.603329 | 0.863254 | 0.879240 |
| 0 | 038 | 0.942011 | 0.369760 | 0.389782 |
| 0 | 039 | 0.609022 | 0.615358 | 0.888849 |
| 0 | 040 | 0.948999 | 0.119656 | 0.387343 |
| 0 | 041 | 0.410897 | 0.983311 | 0.106188 |
| 0 | 042 | 0.127716 | 0.492424 | 0.617296 |
| 0 | 043 | 0.433876 | 0.491002 | 0.100972 |
| 0 | 044 | 0.104429 | 0.996334 | 0.579375 |
| 0 | 045 | 0.632925 | 0.993142 | 0.885180 |
| 0 | 046 | 0.911907 | 0.499343 | 0.384466 |
| 0 | 047 | 0.603964 | 0.484160 | 0.921108 |
| 0 | 048 | 0.938074 | 0.988392 | 0.411105 |
| 0 | 049 | 0.336146 | 0.060814 | 0.438845 |
| 0 | 050 | 0.200800 | 0.544392 | 0.956219 |
| 0 | 051 | 0.341779 | 0.445694 | 0.441929 |
| 0 | 052 | 0.205146 | 0.944600 | 0.918620 |
| 0 | 053 | 0.707107 | 0.922880 | 0.550029 |
| 0 | 054 | 0.835154 | 0.423711 | 0.056827 |
| 0 | 055 | 0.703679 | 0.543834 | 0.576265 |
| 0 | 056 | 0.840253 | 0.033856 | 0.068674 |
| 0 | 057 | 0.349175 | 0.943678 | 0.347775 |
| 0 | 058 | 0.190975 | 0.441262 | 0.829563 |
| 0 | 059 | 0.340788 | 0.542611 | 0.306923 |
| 0 | 060 | 0.215499 | 0.044771 | 0.791940 |
| 0 | 061 | 0.697545 | 0.037177 | 0.650299 |
| 0 | 062 | 0.851540 | 0.539231 | 0.150344 |

|   |      |          |          |          |
|---|------|----------|----------|----------|
| 0 | 063  | 0.721126 | 0.435562 | 0.687023 |
| 0 | 064  | 0.835867 | 0.933672 | 0.196211 |
| 0 | 065  | 0.267892 | 0.035874 | 0.277085 |
| 0 | 066  | 0.273899 | 0.539639 | 0.796011 |
| 0 | 067  | 0.272866 | 0.429775 | 0.278978 |
| 0 | 068  | 0.273717 | 0.929958 | 0.752698 |
| 0 | 069  | 0.776394 | 0.940656 | 0.713052 |
| 0 | 070  | 0.769682 | 0.449100 | 0.222284 |
| 0 | 071  | 0.766464 | 0.552150 | 0.748286 |
| 0 | 072  | 0.769335 | 0.044862 | 0.231639 |
| 0 | 073  | 0.309255 | 0.127800 | 0.600706 |
| 0 | 074  | 0.225959 | 0.616875 | 0.114137 |
| 0 | 075  | 0.317318 | 0.368422 | 0.594633 |
| 0 | 076  | 0.213243 | 0.860968 | 0.065573 |
| 0 | 077  | 0.734057 | 0.855318 | 0.388776 |
| 0 | 078  | 0.811268 | 0.353885 | 0.895345 |
| 0 | 079  | 0.720633 | 0.617484 | 0.418879 |
| 0 | 080  | 0.829009 | 0.112509 | 0.916044 |
| 0 | 081  | 0.224323 | 0.036911 | 0.535374 |
| 0 | 082  | 0.316724 | 0.533852 | 0.044844 |
| 0 | 083  | 0.219442 | 0.434586 | 0.508705 |
| 0 | 084  | 0.321942 | 0.920409 | 0.995631 |
| 0 | 085  | 0.818766 | 0.946794 | 0.453801 |
| 0 | 086  | 0.723596 | 0.442554 | 0.959299 |
| 0 | 087  | 0.823368 | 0.555302 | 0.502897 |
| 0 | 088  | 0.721755 | 0.055904 | 0.994369 |
| 0 | 089  | 0.337353 | 0.998787 | 0.613250 |
| 0 | 090  | 0.209440 | 0.484735 | 0.127447 |
| 0 | 091  | 0.308342 | 0.499026 | 0.614595 |
| 0 | 092  | 0.236375 | 0.990724 | 0.097006 |
| 0 | 093  | 0.705047 | 0.984879 | 0.377734 |
| 0 | 094  | 0.835498 | 0.483708 | 0.881834 |
| 0 | 095  | 0.734537 | 0.486116 | 0.404732 |
| 0 | 096  | 0.806121 | 0.983162 | 0.894067 |
| 0 | 097  | 0.131865 | 0.125442 | 0.581926 |
| 0 | 098  | 0.405474 | 0.620588 | 0.111133 |
| 0 | 099  | 0.126054 | 0.361237 | 0.593393 |
| 0 | 0100 | 0.418614 | 0.853041 | 0.080779 |
| 0 | 0101 | 0.909691 | 0.858183 | 0.403754 |
| 0 | 0102 | 0.631637 | 0.354259 | 0.911918 |
| 0 | 0103 | 0.920997 | 0.627796 | 0.430389 |
| 0 | 0104 | 0.624175 | 0.124304 | 0.912917 |
| 0 | 0105 | 0.124412 | 0.060822 | 0.411510 |
| 0 | 0106 | 0.422228 | 0.561590 | 0.937055 |

|   |      |          |          |          |
|---|------|----------|----------|----------|
| 0 | 0107 | 0.096484 | 0.440044 | 0.443795 |
| 0 | 0108 | 0.443849 | 0.932366 | 0.930599 |
| 0 | 0109 | 0.918375 | 0.920303 | 0.576079 |
| 0 | 0110 | 0.625339 | 0.415926 | 0.085201 |
| 0 | 0111 | 0.945466 | 0.537000 | 0.566108 |
| 0 | 0112 | 0.599785 | 0.043020 | 0.060527 |
| 0 | 0113 | 0.144303 | 0.035270 | 0.219155 |
| 0 | 0114 | 0.398150 | 0.541272 | 0.743569 |
| 0 | 0115 | 0.143068 | 0.417816 | 0.262433 |
| 0 | 0116 | 0.403952 | 0.925267 | 0.741568 |
| 0 | 0117 | 0.900225 | 0.946004 | 0.768600 |
| 0 | 0118 | 0.645660 | 0.443469 | 0.276512 |
| 0 | 0119 | 0.897248 | 0.556450 | 0.747541 |
| 0 | 0120 | 0.639892 | 0.058304 | 0.247981 |
| 0 | 0121 | 0.105169 | 0.939503 | 0.341823 |
| 0 | 0122 | 0.440471 | 0.442099 | 0.858614 |
| 0 | 0123 | 0.113294 | 0.540772 | 0.317703 |
| 0 | 0124 | 0.435345 | 0.041613 | 0.821531 |
| 0 | 0125 | 0.941641 | 0.040524 | 0.646630 |
| 0 | 0126 | 0.603517 | 0.537060 | 0.152913 |
| 0 | 0127 | 0.936000 | 0.436832 | 0.691870 |
| 0 | 0128 | 0.614506 | 0.938571 | 0.178203 |
| 0 | 0129 | 0.227269 | 0.118999 | 0.137480 |
| 0 | 0130 | 0.316812 | 0.625657 | 0.660816 |
| 0 | 0131 | 0.220614 | 0.352096 | 0.141819 |
| 0 | 0132 | 0.333205 | 0.865551 | 0.606848 |
| 0 | 0133 | 0.821816 | 0.856925 | 0.849634 |
| 0 | 0134 | 0.730696 | 0.359665 | 0.355340 |
| 0 | 0135 | 0.831118 | 0.616781 | 0.887317 |
| 0 | 0136 | 0.717296 | 0.117705 | 0.375683 |
| 0 | 0137 | 0.520319 | 0.849024 | 0.207638 |
| 0 | 0138 | 0.027365 | 0.344903 | 0.722306 |
| 0 | 0139 | 0.517234 | 0.627536 | 0.214531 |
| 0 | 0140 | 0.029444 | 0.130606 | 0.706102 |
| 0 | 0141 | 0.527813 | 0.131201 | 0.779151 |
| 0 | 0142 | 0.016039 | 0.628415 | 0.294175 |
| 0 | 0143 | 0.527297 | 0.352592 | 0.792800 |
| 0 | 0144 | 0.015093 | 0.851501 | 0.287200 |
| 0 | 0145 | 0.403082 | 0.820136 | 0.272331 |
| 0 | 0146 | 0.149594 | 0.321698 | 0.778349 |
| 0 | 0147 | 0.405291 | 0.670869 | 0.295770 |
| 0 | 0148 | 0.148010 | 0.155733 | 0.774145 |
| 0 | 0149 | 0.650633 | 0.150423 | 0.724431 |
| 0 | 0150 | 0.894122 | 0.649484 | 0.241061 |

|   |      |          |          |          |
|---|------|----------|----------|----------|
| 0 | 0151 | 0.644695 | 0.330614 | 0.717857 |
| 0 | 0152 | 0.898537 | 0.819567 | 0.215093 |
| 0 | 0153 | 0.461547 | 0.737489 | 0.147436 |
| 0 | 0154 | 0.092105 | 0.240822 | 0.649752 |
| 0 | 0155 | 0.591196 | 0.240423 | 0.837361 |
| 0 | 0156 | 0.955348 | 0.741127 | 0.348240 |
| 0 | 0157 | 0.329362 | 0.810514 | 0.427635 |
| 0 | 0158 | 0.210643 | 0.338495 | 0.948015 |
| 0 | 0159 | 0.339037 | 0.641784 | 0.468269 |
| 0 | 0160 | 0.208895 | 0.132101 | 0.944197 |
| 0 | 0161 | 0.721757 | 0.153332 | 0.564902 |
| 0 | 0162 | 0.832600 | 0.659114 | 0.073775 |
| 0 | 0163 | 0.708438 | 0.340494 | 0.548047 |
| 0 | 0164 | 0.837988 | 0.845714 | 0.044659 |
| 0 | 0165 | 0.263299 | 0.851903 | 0.246056 |
| 0 | 0166 | 0.278089 | 0.347855 | 0.780818 |
| 0 | 0167 | 0.262914 | 0.663221 | 0.291781 |
| 0 | 0168 | 0.279454 | 0.158994 | 0.787631 |
| 0 | 0169 | 0.778766 | 0.122403 | 0.735743 |
| 0 | 0170 | 0.766758 | 0.621277 | 0.234582 |
| 0 | 0171 | 0.775920 | 0.318626 | 0.711576 |
| 0 | 0172 | 0.767441 | 0.822064 | 0.202879 |
| 0 | 0173 | 0.294875 | 0.741015 | 0.584346 |
| 0 | 0174 | 0.244673 | 0.235663 | 0.057999 |
| 0 | 0175 | 0.746666 | 0.241245 | 0.426628 |
| 0 | 0176 | 0.802564 | 0.741456 | 0.930140 |
| 0 | 0177 | 0.217662 | 0.840347 | 0.521682 |
| 0 | 0178 | 0.328183 | 0.336340 | 0.032130 |
| 0 | 0179 | 0.215528 | 0.638707 | 0.534926 |
| 0 | 0180 | 0.329558 | 0.137744 | 0.018086 |
| 0 | 0181 | 0.831860 | 0.143194 | 0.461462 |
| 0 | 0182 | 0.719526 | 0.644251 | 0.981175 |
| 0 | 0183 | 0.829811 | 0.338406 | 0.480253 |
| 0 | 0184 | 0.718373 | 0.840056 | 0.967176 |
| 0 | 0185 | 0.134878 | 0.740876 | 0.564854 |
| 0 | 0186 | 0.411087 | 0.235816 | 0.070035 |
| 0 | 0187 | 0.915480 | 0.244292 | 0.428744 |
| 0 | 0188 | 0.635042 | 0.740150 | 0.929246 |
| 0 | 0189 | 0.111674 | 0.817518 | 0.410583 |
| 0 | 0190 | 0.436580 | 0.319466 | 0.925467 |
| 0 | 0191 | 0.104421 | 0.647170 | 0.433254 |
| 0 | 0192 | 0.441089 | 0.155746 | 0.920448 |
| 0 | 0193 | 0.937089 | 0.161915 | 0.575026 |
| 0 | 0194 | 0.606750 | 0.657949 | 0.077341 |

|    |       |          |          |          |
|----|-------|----------|----------|----------|
| O  | O195  | 0.942937 | 0.329374 | 0.575493 |
| O  | O196  | 0.607640 | 0.828778 | 0.067764 |
| O  | O197  | 0.134756 | 0.838656 | 0.218363 |
| O  | O198  | 0.404173 | 0.344382 | 0.737009 |
| O  | O199  | 0.136553 | 0.660243 | 0.242204 |
| O  | O200  | 0.404438 | 0.154189 | 0.730871 |
| O  | O201  | 0.906344 | 0.141451 | 0.763815 |
| O  | O202  | 0.640227 | 0.639483 | 0.267080 |
| O  | O203  | 0.902396 | 0.319558 | 0.762313 |
| O  | O204  | 0.642424 | 0.821352 | 0.257269 |
| O  | O205  | 0.215431 | 0.744337 | 0.151625 |
| O  | O206  | 0.325882 | 0.249669 | 0.666350 |
| O  | O207  | 0.821236 | 0.229708 | 0.835927 |
| O  | O208  | 0.724667 | 0.731538 | 0.328935 |
| Al | Al209 | 0.331200 | 0.862155 | 0.319112 |
| Al | Al210 | 0.333182 | 0.625820 | 0.336216 |
| Si | Si211 | 0.713384 | 0.652551 | 0.310945 |
| Si | Si212 | 0.442113 | 0.043858 | 0.171564 |
| Si | Si213 | 0.098439 | 0.551801 | 0.685999 |
| Si | Si214 | 0.450349 | 0.429067 | 0.174900 |
| Si | Si215 | 0.093112 | 0.934624 | 0.655425 |
| Si | Si216 | 0.602110 | 0.933229 | 0.818568 |
| Si | Si217 | 0.943375 | 0.436858 | 0.323204 |
| Si | Si218 | 0.593492 | 0.543161 | 0.840382 |
| Si | Si219 | 0.952126 | 0.047825 | 0.331640 |
| Si | Si220 | 0.337777 | 0.021979 | 0.332613 |
| Si | Si221 | 0.202399 | 0.520915 | 0.842032 |
| Si | Si222 | 0.339254 | 0.463554 | 0.323840 |
| Si | Si223 | 0.209634 | 0.964291 | 0.802916 |
| Si | Si224 | 0.707163 | 0.957026 | 0.658986 |
| Si | Si225 | 0.838759 | 0.459680 | 0.164226 |
| Si | Si226 | 0.707687 | 0.515217 | 0.688640 |
| Si | Si227 | 0.836232 | 0.014437 | 0.184905 |
| Si | Si228 | 0.301786 | 0.056033 | 0.546479 |
| Si | Si229 | 0.238394 | 0.545839 | 0.062301 |
| Si | Si230 | 0.296720 | 0.436801 | 0.539485 |
| Si | Si231 | 0.243933 | 0.928819 | 0.020854 |
| Si | Si232 | 0.741686 | 0.927482 | 0.441925 |
| Si | Si233 | 0.801447 | 0.425682 | 0.948137 |
| Si | Si234 | 0.745881 | 0.550520 | 0.474702 |
| Si | Si235 | 0.799147 | 0.046419 | 0.967832 |
| Si | Si236 | 0.146820 | 0.055046 | 0.526670 |
| Si | Si237 | 0.394054 | 0.551683 | 0.049403 |
| Si | Si238 | 0.142678 | 0.431956 | 0.540891 |

|    |       |          |          |          |
|----|-------|----------|----------|----------|
| Si | Si239 | 0.398239 | 0.923096 | 0.028314 |
| Si | Si240 | 0.896437 | 0.928142 | 0.460878 |
| Si | Si241 | 0.646382 | 0.423656 | 0.969724 |
| Si | Si242 | 0.900356 | 0.554563 | 0.470999 |
| Si | Si243 | 0.644870 | 0.053922 | 0.963110 |
| Si | Si244 | 0.099890 | 0.018422 | 0.315213 |
| Si | Si245 | 0.444058 | 0.521627 | 0.837378 |
| Si | Si246 | 0.093124 | 0.462636 | 0.327904 |
| Si | Si247 | 0.452234 | 0.962520 | 0.819452 |
| Si | Si248 | 0.945190 | 0.961421 | 0.672167 |
| Si | Si249 | 0.599617 | 0.458121 | 0.181106 |
| Si | Si250 | 0.950847 | 0.516035 | 0.682210 |
| Si | Si251 | 0.592299 | 0.016644 | 0.173870 |
| Si | Si252 | 0.219637 | 0.044476 | 0.182968 |
| Si | Si253 | 0.323573 | 0.550261 | 0.704040 |
| Si | Si254 | 0.212271 | 0.421559 | 0.202489 |
| Si | Si255 | 0.336259 | 0.930681 | 0.678193 |
| Si | Si256 | 0.826140 | 0.932203 | 0.806123 |
| Si | Si257 | 0.720520 | 0.434829 | 0.314339 |
| Si | Si258 | 0.832352 | 0.551709 | 0.816515 |
| Si | Si259 | 0.708468 | 0.051386 | 0.308625 |
| Si | Si260 | 0.450650 | 0.815614 | 0.175229 |
| Si | Si261 | 0.098722 | 0.317481 | 0.685980 |
| Si | Si262 | 0.447034 | 0.663458 | 0.191872 |
| Si | Si263 | 0.100441 | 0.162776 | 0.677934 |
| Si | Si264 | 0.598264 | 0.161709 | 0.813297 |
| Si | Si265 | 0.947233 | 0.662016 | 0.328192 |
| Si | Si266 | 0.598541 | 0.319255 | 0.814850 |
| Si | Si267 | 0.945075 | 0.817741 | 0.313522 |
| Si | Si268 | 0.207733 | 0.362333 | 0.833861 |
| Si | Si269 | 0.212437 | 0.122572 | 0.824805 |
| Si | Si270 | 0.712379 | 0.115625 | 0.669601 |
| Si | Si271 | 0.836494 | 0.616779 | 0.175671 |
| Si | Si272 | 0.711983 | 0.356250 | 0.666106 |
| Si | Si273 | 0.835727 | 0.855626 | 0.164199 |
| Si | Si274 | 0.293147 | 0.815091 | 0.535180 |
| Si | Si275 | 0.251210 | 0.315407 | 0.045503 |
| Si | Si276 | 0.289937 | 0.661809 | 0.561196 |
| Si | Si277 | 0.252676 | 0.156609 | 0.038819 |
| Si | Si278 | 0.754531 | 0.163566 | 0.456678 |
| Si | Si279 | 0.796381 | 0.665154 | 0.967331 |
| Si | Si280 | 0.753922 | 0.319515 | 0.453436 |
| Si | Si281 | 0.795377 | 0.820720 | 0.949220 |
| Si | Si282 | 0.140817 | 0.816354 | 0.522529 |

|    |       |          |          |          |
|----|-------|----------|----------|----------|
| Si | Si283 | 0.404854 | 0.313183 | 0.035848 |
| Si | Si284 | 0.138325 | 0.662102 | 0.538885 |
| Si | Si285 | 0.406256 | 0.159907 | 0.028597 |
| Si | Si286 | 0.908478 | 0.166941 | 0.462929 |
| Si | Si287 | 0.642424 | 0.664197 | 0.969788 |
| Si | Si288 | 0.907546 | 0.320330 | 0.468721 |
| Si | Si289 | 0.641521 | 0.818152 | 0.960560 |
| Si | Si290 | 0.092397 | 0.861792 | 0.313376 |
| Si | Si291 | 0.451940 | 0.364500 | 0.828319 |
| Si | Si292 | 0.093255 | 0.619259 | 0.321501 |
| Si | Si293 | 0.451971 | 0.120658 | 0.813306 |
| Si | Si294 | 0.953765 | 0.118402 | 0.673364 |
| Si | Si295 | 0.592212 | 0.615271 | 0.177712 |
| Si | Si296 | 0.952166 | 0.357685 | 0.687433 |
| Si | Si297 | 0.596507 | 0.859861 | 0.177090 |
| Si | Si298 | 0.207916 | 0.823663 | 0.172970 |
| Si | Si299 | 0.331087 | 0.327521 | 0.695609 |
| Si | Si300 | 0.211650 | 0.670899 | 0.201809 |
| Si | Si301 | 0.330049 | 0.171848 | 0.696103 |
| Si | Si302 | 0.833965 | 0.151835 | 0.811522 |
| Si | Si303 | 0.828134 | 0.306531 | 0.801305 |
| Si | Si304 | 0.717295 | 0.808429 | 0.294272 |
| Zn | Zn305 | 0.418662 | 0.757832 | 0.392416 |

**C<sub>6</sub>H<sub>8</sub>-Phys.Ads-H<sub>2</sub>-Phys.Ads-Zn<sup>2+</sup> (Fig. 9a/M3 in Blue)**

Total energy = -1943.00561272 eV

data\_

\_audit\_creation\_method 'Materials Studio'

\_cell\_length\_a 20.357621

\_cell\_length\_b 20.050598

\_cell\_length\_c 13.476578

\_cell\_angle\_alpha 90.000000

\_cell\_angle\_beta 90.000000

\_cell\_angle\_gamma 90.000000

\_symmetry\_space\_group\_name\_H-M 'P1'

loop\_

\_atom\_site\_type\_symbol

\_atom\_site\_label

\_atom\_site\_fract\_x

\_atom\_site\_fract\_y

\_atom\_site\_fract\_z

|   |    |          |          |          |
|---|----|----------|----------|----------|
| H | H1 | 0.528759 | 0.802166 | 0.390665 |
| H | H2 | 0.520470 | 0.680011 | 0.393616 |

|   |     |          |          |          |
|---|-----|----------|----------|----------|
| H | H3  | 0.564880 | 0.655554 | 0.567404 |
| H | H4  | 0.484740 | 0.624738 | 0.555166 |
| H | H5  | 0.510277 | 0.691563 | 0.716474 |
| H | H6  | 0.437711 | 0.712926 | 0.655380 |
| H | H7  | 0.514962 | 0.814178 | 0.707710 |
| H | H8  | 0.488171 | 0.497373 | 0.512499 |
| H | H9  | 0.536305 | 0.867324 | 0.546704 |
| H | H10 | 0.474992 | 0.503683 | 0.462270 |
| C | C11 | 0.520012 | 0.776474 | 0.460387 |
| C | C12 | 0.510808 | 0.708336 | 0.461032 |
| C | C13 | 0.513137 | 0.670940 | 0.558344 |
| C | C14 | 0.491634 | 0.713543 | 0.647605 |
| C | C15 | 0.512558 | 0.785107 | 0.639845 |
| C | C16 | 0.524071 | 0.814739 | 0.551487 |
| O | O17 | 0.521298 | 0.026465 | 0.209721 |
| O | O18 | 0.025534 | 0.537678 | 0.711347 |
| O | O19 | 0.524902 | 0.438495 | 0.207902 |
| O | O20 | 0.021213 | 0.934738 | 0.701597 |
| O | O21 | 0.528953 | 0.948548 | 0.789324 |
| O | O22 | 0.016263 | 0.455075 | 0.284855 |
| O | O23 | 0.519267 | 0.542528 | 0.798745 |
| O | O24 | 0.030561 | 0.038680 | 0.291255 |
| O | O25 | 0.404167 | 0.056400 | 0.281110 |
| O | O26 | 0.148798 | 0.553875 | 0.764119 |
| O | O27 | 0.396485 | 0.424690 | 0.241763 |
| O | O28 | 0.143145 | 0.943091 | 0.762404 |
| O | O29 | 0.646417 | 0.925935 | 0.717122 |
| O | O30 | 0.896817 | 0.423066 | 0.224331 |
| O | O31 | 0.640561 | 0.525720 | 0.741100 |
| O | O32 | 0.906206 | 0.039925 | 0.238274 |
| O | O33 | 0.447300 | 0.116904 | 0.119256 |
| O | O34 | 0.104377 | 0.614034 | 0.602986 |
| O | O35 | 0.453024 | 0.364581 | 0.089018 |
| O | O36 | 0.111547 | 0.860092 | 0.615685 |
| O | O37 | 0.607465 | 0.863494 | 0.879062 |
| O | O38 | 0.945066 | 0.369823 | 0.388784 |
| O | O39 | 0.610881 | 0.616700 | 0.877990 |
| O | O40 | 0.949634 | 0.119874 | 0.382434 |
| O | O41 | 0.412735 | 0.989566 | 0.112593 |
| O | O42 | 0.120477 | 0.482712 | 0.604172 |
| O | O43 | 0.441577 | 0.496218 | 0.087310 |
| O | O44 | 0.108903 | 0.990280 | 0.583980 |
| O | O45 | 0.635994 | 0.993590 | 0.884442 |
| O | O46 | 0.909428 | 0.498394 | 0.381413 |



|   |     |          |          |          |
|---|-----|----------|----------|----------|
| 0 | 047 | 0.604367 | 0.487116 | 0.922574 |
| 0 | 048 | 0.941488 | 0.988955 | 0.413177 |
| 0 | 049 | 0.342054 | 0.056600 | 0.450626 |
| 0 | 050 | 0.219844 | 0.553601 | 0.925132 |
| 0 | 051 | 0.335687 | 0.420472 | 0.413670 |
| 0 | 052 | 0.206973 | 0.942121 | 0.931443 |
| 0 | 053 | 0.708969 | 0.922722 | 0.548606 |
| 0 | 054 | 0.834208 | 0.423003 | 0.055582 |
| 0 | 055 | 0.704367 | 0.542200 | 0.575311 |
| 0 | 056 | 0.843769 | 0.032788 | 0.067889 |
| 0 | 057 | 0.357710 | 0.941852 | 0.353468 |
| 0 | 058 | 0.193246 | 0.438632 | 0.834550 |
| 0 | 059 | 0.354387 | 0.537203 | 0.324445 |
| 0 | 060 | 0.220485 | 0.044984 | 0.808680 |
| 0 | 061 | 0.700367 | 0.037119 | 0.647344 |
| 0 | 062 | 0.851577 | 0.537828 | 0.151173 |
| 0 | 063 | 0.727446 | 0.434296 | 0.684375 |
| 0 | 064 | 0.835263 | 0.932374 | 0.194668 |
| 0 | 065 | 0.275030 | 0.034564 | 0.286442 |
| 0 | 066 | 0.275707 | 0.523776 | 0.754059 |
| 0 | 067 | 0.268041 | 0.449830 | 0.254018 |
| 0 | 068 | 0.272531 | 0.928857 | 0.762302 |
| 0 | 069 | 0.777082 | 0.939747 | 0.713280 |
| 0 | 070 | 0.767744 | 0.448614 | 0.220076 |
| 0 | 071 | 0.768225 | 0.552144 | 0.746813 |
| 0 | 072 | 0.776215 | 0.046660 | 0.234181 |
| 0 | 073 | 0.311517 | 0.123694 | 0.611635 |
| 0 | 074 | 0.226146 | 0.621724 | 0.089038 |
| 0 | 075 | 0.316473 | 0.360790 | 0.583194 |
| 0 | 076 | 0.221825 | 0.862064 | 0.082707 |
| 0 | 077 | 0.739409 | 0.854858 | 0.388726 |
| 0 | 078 | 0.812315 | 0.353027 | 0.893344 |
| 0 | 079 | 0.713182 | 0.614110 | 0.415642 |
| 0 | 080 | 0.832214 | 0.111251 | 0.915111 |
| 0 | 081 | 0.228923 | 0.031637 | 0.542077 |
| 0 | 082 | 0.320389 | 0.533971 | 0.047207 |
| 0 | 083 | 0.219907 | 0.431312 | 0.503783 |
| 0 | 084 | 0.326378 | 0.923443 | 0.001762 |
| 0 | 085 | 0.821856 | 0.947682 | 0.455847 |
| 0 | 086 | 0.723596 | 0.441692 | 0.955728 |
| 0 | 087 | 0.821580 | 0.559129 | 0.495451 |
| 0 | 088 | 0.724957 | 0.055091 | 0.995255 |
| 0 | 089 | 0.341087 | 0.995616 | 0.625603 |
| 0 | 090 | 0.202890 | 0.489617 | 0.094736 |

|   |      |          |          |          |
|---|------|----------|----------|----------|
| 0 | 091  | 0.324353 | 0.492919 | 0.576987 |
| 0 | 092  | 0.241513 | 0.992742 | 0.105728 |
| 0 | 093  | 0.708919 | 0.983567 | 0.375088 |
| 0 | 094  | 0.836237 | 0.482551 | 0.880305 |
| 0 | 095  | 0.734384 | 0.483712 | 0.404194 |
| 0 | 096  | 0.808417 | 0.982018 | 0.893745 |
| 0 | 097  | 0.138157 | 0.119220 | 0.595173 |
| 0 | 098  | 0.411530 | 0.624501 | 0.090038 |
| 0 | 099  | 0.126980 | 0.352520 | 0.581094 |
| 0 | 0100 | 0.420102 | 0.858332 | 0.095954 |
| 0 | 0101 | 0.911546 | 0.859260 | 0.400858 |
| 0 | 0102 | 0.629184 | 0.356226 | 0.910279 |
| 0 | 0103 | 0.923839 | 0.626596 | 0.428499 |
| 0 | 0104 | 0.628342 | 0.124469 | 0.912958 |
| 0 | 0105 | 0.128015 | 0.059639 | 0.420946 |
| 0 | 0106 | 0.416588 | 0.559229 | 0.918508 |
| 0 | 0107 | 0.100422 | 0.428578 | 0.427243 |
| 0 | 0108 | 0.450236 | 0.934091 | 0.942912 |
| 0 | 0109 | 0.921820 | 0.917744 | 0.575478 |
| 0 | 0110 | 0.626110 | 0.416418 | 0.084277 |
| 0 | 0111 | 0.941632 | 0.533836 | 0.563453 |
| 0 | 0112 | 0.602327 | 0.042936 | 0.059791 |
| 0 | 0113 | 0.151151 | 0.038741 | 0.228909 |
| 0 | 0114 | 0.403298 | 0.528565 | 0.725229 |
| 0 | 0115 | 0.139770 | 0.426610 | 0.238664 |
| 0 | 0116 | 0.403520 | 0.922419 | 0.759111 |
| 0 | 0117 | 0.901453 | 0.943236 | 0.767635 |
| 0 | 0118 | 0.644351 | 0.440259 | 0.277176 |
| 0 | 0119 | 0.899177 | 0.555334 | 0.747390 |
| 0 | 0120 | 0.646032 | 0.057978 | 0.245036 |
| 0 | 0121 | 0.110522 | 0.939813 | 0.344598 |
| 0 | 0122 | 0.445839 | 0.438321 | 0.854069 |
| 0 | 0123 | 0.111970 | 0.541378 | 0.326418 |
| 0 | 0124 | 0.438207 | 0.040667 | 0.827100 |
| 0 | 0125 | 0.944783 | 0.037430 | 0.647056 |
| 0 | 0126 | 0.607248 | 0.536778 | 0.155625 |
| 0 | 0127 | 0.940698 | 0.436199 | 0.693787 |
| 0 | 0128 | 0.617181 | 0.938292 | 0.176776 |
| 0 | 0129 | 0.236273 | 0.120725 | 0.148630 |
| 0 | 0130 | 0.329665 | 0.616952 | 0.637867 |
| 0 | 0131 | 0.222121 | 0.359466 | 0.128226 |
| 0 | 0132 | 0.335511 | 0.862818 | 0.622852 |
| 0 | 0133 | 0.821997 | 0.855538 | 0.849348 |
| 0 | 0134 | 0.731679 | 0.357833 | 0.353244 |

|   |      |          |          |          |
|---|------|----------|----------|----------|
| 0 | 0135 | 0.833341 | 0.615354 | 0.887594 |
| 0 | 0136 | 0.720790 | 0.116293 | 0.377699 |
| 0 | 0137 | 0.525226 | 0.847427 | 0.213982 |
| 0 | 0138 | 0.031431 | 0.342769 | 0.717770 |
| 0 | 0139 | 0.517896 | 0.627055 | 0.207461 |
| 0 | 0140 | 0.031557 | 0.126364 | 0.710501 |
| 0 | 0141 | 0.529893 | 0.130892 | 0.782086 |
| 0 | 0142 | 0.018818 | 0.631234 | 0.292998 |
| 0 | 0143 | 0.529537 | 0.348348 | 0.783017 |
| 0 | 0144 | 0.020649 | 0.850299 | 0.292751 |
| 0 | 0145 | 0.409517 | 0.814061 | 0.282773 |
| 0 | 0146 | 0.154926 | 0.321203 | 0.768311 |
| 0 | 0147 | 0.403660 | 0.667280 | 0.279045 |
| 0 | 0148 | 0.147803 | 0.153145 | 0.786395 |
| 0 | 0149 | 0.651328 | 0.148924 | 0.722747 |
| 0 | 0150 | 0.896017 | 0.648246 | 0.239372 |
| 0 | 0151 | 0.650058 | 0.330203 | 0.718465 |
| 0 | 0152 | 0.905873 | 0.822519 | 0.211271 |
| 0 | 0153 | 0.465149 | 0.739538 | 0.143054 |
| 0 | 0154 | 0.094510 | 0.235317 | 0.652781 |
| 0 | 0155 | 0.595459 | 0.240053 | 0.837355 |
| 0 | 0156 | 0.955095 | 0.741287 | 0.347574 |
| 0 | 0157 | 0.341636 | 0.810057 | 0.443092 |
| 0 | 0158 | 0.216123 | 0.328538 | 0.937914 |
| 0 | 0159 | 0.342994 | 0.659434 | 0.449737 |
| 0 | 0160 | 0.211914 | 0.135025 | 0.955973 |
| 0 | 0161 | 0.724042 | 0.154573 | 0.565539 |
| 0 | 0162 | 0.831385 | 0.657446 | 0.074453 |
| 0 | 0163 | 0.711548 | 0.338878 | 0.546799 |
| 0 | 0164 | 0.841080 | 0.844110 | 0.043922 |
| 0 | 0165 | 0.270346 | 0.845557 | 0.264052 |
| 0 | 0166 | 0.282678 | 0.351432 | 0.773219 |
| 0 | 0167 | 0.262432 | 0.643417 | 0.276696 |
| 0 | 0168 | 0.279106 | 0.161388 | 0.795136 |
| 0 | 0169 | 0.779408 | 0.122183 | 0.737169 |
| 0 | 0170 | 0.768214 | 0.620394 | 0.237962 |
| 0 | 0171 | 0.780954 | 0.316687 | 0.708462 |
| 0 | 0172 | 0.774362 | 0.816959 | 0.205526 |
| 0 | 0173 | 0.299916 | 0.738362 | 0.593616 |
| 0 | 0174 | 0.250813 | 0.237843 | 0.068924 |
| 0 | 0175 | 0.750242 | 0.240204 | 0.424709 |
| 0 | 0176 | 0.804299 | 0.739979 | 0.930013 |
| 0 | 0177 | 0.224654 | 0.837253 | 0.523797 |
| 0 | 0178 | 0.332086 | 0.338149 | 0.026989 |

|    |       |          |          |          |
|----|-------|----------|----------|----------|
| O  | O179  | 0.223483 | 0.637797 | 0.527252 |
| O  | O180  | 0.334496 | 0.139989 | 0.022391 |
| O  | O181  | 0.835043 | 0.142938 | 0.465284 |
| O  | O182  | 0.720159 | 0.642787 | 0.976521 |
| O  | O183  | 0.832226 | 0.338651 | 0.476308 |
| O  | O184  | 0.720636 | 0.838349 | 0.971220 |
| O  | O185  | 0.142270 | 0.737601 | 0.568527 |
| O  | O186  | 0.415992 | 0.239381 | 0.068436 |
| O  | O187  | 0.918528 | 0.243813 | 0.429795 |
| O  | O188  | 0.636494 | 0.740233 | 0.926942 |
| O  | O189  | 0.112583 | 0.821453 | 0.425280 |
| O  | O190  | 0.434220 | 0.313346 | 0.909253 |
| O  | O191  | 0.115906 | 0.657356 | 0.418528 |
| O  | O192  | 0.448614 | 0.151967 | 0.930352 |
| O  | O193  | 0.943623 | 0.158417 | 0.572439 |
| O  | O194  | 0.605734 | 0.654381 | 0.068221 |
| O  | O195  | 0.944001 | 0.329722 | 0.575126 |
| O  | O196  | 0.608510 | 0.827863 | 0.067800 |
| O  | O197  | 0.142009 | 0.834390 | 0.232636 |
| O  | O198  | 0.407346 | 0.346665 | 0.722297 |
| O  | O199  | 0.137249 | 0.652597 | 0.224268 |
| O  | O200  | 0.405044 | 0.154335 | 0.743176 |
| O  | O201  | 0.907396 | 0.139854 | 0.759821 |
| O  | O202  | 0.640802 | 0.645042 | 0.258444 |
| O  | O203  | 0.906570 | 0.319177 | 0.763673 |
| O  | O204  | 0.648262 | 0.821834 | 0.256022 |
| O  | O205  | 0.222278 | 0.742836 | 0.159231 |
| O  | O206  | 0.328065 | 0.247085 | 0.668988 |
| O  | O207  | 0.825054 | 0.228897 | 0.835909 |
| O  | O208  | 0.726561 | 0.730493 | 0.333040 |
| Al | Al209 | 0.340593 | 0.859368 | 0.331116 |
| Al | Al210 | 0.335847 | 0.620554 | 0.329428 |
| Si | Si211 | 0.712614 | 0.652591 | 0.309893 |
| Si | Si212 | 0.446474 | 0.047300 | 0.180721 |
| Si | Si213 | 0.099801 | 0.547041 | 0.669960 |
| Si | Si214 | 0.452632 | 0.431133 | 0.157698 |
| Si | Si215 | 0.097098 | 0.932044 | 0.665885 |
| Si | Si216 | 0.604672 | 0.933543 | 0.818941 |
| Si | Si217 | 0.942645 | 0.436513 | 0.320903 |
| Si | Si218 | 0.594740 | 0.542668 | 0.835894 |
| Si | Si219 | 0.956264 | 0.046817 | 0.331329 |
| Si | Si220 | 0.344753 | 0.020279 | 0.342475 |
| Si | Si221 | 0.209388 | 0.517282 | 0.819801 |
| Si | Si222 | 0.338841 | 0.459811 | 0.307893 |

|    |       |          |          |          |
|----|-------|----------|----------|----------|
| Si | Si223 | 0.210753 | 0.964754 | 0.816663 |
| Si | Si224 | 0.708634 | 0.956913 | 0.657539 |
| Si | Si225 | 0.837534 | 0.458333 | 0.163468 |
| Si | Si226 | 0.710511 | 0.513383 | 0.687162 |
| Si | Si227 | 0.840506 | 0.012980 | 0.184053 |
| Si | Si228 | 0.305834 | 0.052024 | 0.556882 |
| Si | Si229 | 0.241891 | 0.550257 | 0.040321 |
| Si | Si230 | 0.298958 | 0.426422 | 0.519291 |
| Si | Si231 | 0.248803 | 0.929514 | 0.032111 |
| Si | Si232 | 0.745219 | 0.927135 | 0.441642 |
| Si | Si233 | 0.801543 | 0.424757 | 0.946173 |
| Si | Si234 | 0.743925 | 0.549672 | 0.471678 |
| Si | Si235 | 0.802240 | 0.045387 | 0.967469 |
| Si | Si236 | 0.151422 | 0.050429 | 0.535159 |
| Si | Si237 | 0.397082 | 0.553391 | 0.035512 |
| Si | Si238 | 0.142476 | 0.423781 | 0.528863 |
| Si | Si239 | 0.401951 | 0.926931 | 0.038491 |
| Si | Si240 | 0.899416 | 0.928188 | 0.460959 |
| Si | Si241 | 0.646003 | 0.424915 | 0.968429 |
| Si | Si242 | 0.898994 | 0.554276 | 0.467308 |
| Si | Si243 | 0.648198 | 0.053916 | 0.963151 |
| Si | Si244 | 0.105095 | 0.019082 | 0.321901 |
| Si | Si245 | 0.445748 | 0.516975 | 0.825066 |
| Si | Si246 | 0.092493 | 0.463009 | 0.318664 |
| Si | Si247 | 0.454909 | 0.961742 | 0.829644 |
| Si | Si248 | 0.947765 | 0.958313 | 0.672571 |
| Si | Si249 | 0.600055 | 0.457715 | 0.180836 |
| Si | Si250 | 0.951935 | 0.515651 | 0.679627 |
| Si | Si251 | 0.596438 | 0.016791 | 0.173519 |
| Si | Si252 | 0.226675 | 0.046080 | 0.192973 |
| Si | Si253 | 0.332346 | 0.539810 | 0.673869 |
| Si | Si254 | 0.208933 | 0.431575 | 0.179047 |
| Si | Si255 | 0.337326 | 0.928523 | 0.692512 |
| Si | Si256 | 0.827284 | 0.930684 | 0.805666 |
| Si | Si257 | 0.719863 | 0.432975 | 0.313290 |
| Si | Si258 | 0.833949 | 0.550830 | 0.815622 |
| Si | Si259 | 0.713568 | 0.050989 | 0.308203 |
| Si | Si260 | 0.454469 | 0.815335 | 0.182978 |
| Si | Si261 | 0.101744 | 0.313545 | 0.679819 |
| Si | Si262 | 0.448902 | 0.663868 | 0.178941 |
| Si | Si263 | 0.103188 | 0.158382 | 0.686500 |
| Si | Si264 | 0.600956 | 0.161245 | 0.813727 |
| Si | Si265 | 0.948886 | 0.662117 | 0.326665 |
| Si | Si266 | 0.601176 | 0.318621 | 0.812060 |

|    |       |          |          |          |
|----|-------|----------|----------|----------|
| Si | Si267 | 0.948964 | 0.818339 | 0.313102 |
| Si | Si268 | 0.212023 | 0.360148 | 0.828026 |
| Si | Si269 | 0.214120 | 0.123419 | 0.836799 |
| Si | Si270 | 0.714070 | 0.115462 | 0.668930 |
| Si | Si271 | 0.837002 | 0.615516 | 0.176533 |
| Si | Si272 | 0.716857 | 0.355031 | 0.664597 |
| Si | Si273 | 0.839840 | 0.854283 | 0.163453 |
| Si | Si274 | 0.299475 | 0.812985 | 0.546524 |
| Si | Si275 | 0.255401 | 0.316032 | 0.040782 |
| Si | Si276 | 0.298206 | 0.662477 | 0.550800 |
| Si | Si277 | 0.258219 | 0.158763 | 0.048343 |
| Si | Si278 | 0.757763 | 0.163112 | 0.457668 |
| Si | Si279 | 0.797326 | 0.663582 | 0.966468 |
| Si | Si280 | 0.756425 | 0.318575 | 0.451226 |
| Si | Si281 | 0.797326 | 0.819146 | 0.949774 |
| Si | Si282 | 0.147430 | 0.814684 | 0.532693 |
| Si | Si283 | 0.408526 | 0.314142 | 0.023859 |
| Si | Si284 | 0.146338 | 0.661272 | 0.528981 |
| Si | Si285 | 0.411176 | 0.161673 | 0.035500 |
| Si | Si286 | 0.911847 | 0.166124 | 0.462495 |
| Si | Si287 | 0.643400 | 0.663237 | 0.962878 |
| Si | Si288 | 0.910019 | 0.320347 | 0.467469 |
| Si | Si289 | 0.643719 | 0.817532 | 0.961229 |
| Si | Si290 | 0.097226 | 0.861388 | 0.322777 |
| Si | Si291 | 0.454159 | 0.361529 | 0.817014 |
| Si | Si292 | 0.096464 | 0.620580 | 0.315200 |
| Si | Si293 | 0.455111 | 0.119665 | 0.820748 |
| Si | Si294 | 0.956733 | 0.115476 | 0.672685 |
| Si | Si295 | 0.593331 | 0.615337 | 0.172136 |
| Si | Si296 | 0.955669 | 0.356984 | 0.687081 |
| Si | Si297 | 0.600282 | 0.859344 | 0.177709 |
| Si | Si298 | 0.215445 | 0.821192 | 0.187136 |
| Si | Si299 | 0.333464 | 0.326216 | 0.687887 |
| Si | Si300 | 0.213361 | 0.665161 | 0.189566 |
| Si | Si301 | 0.331191 | 0.170513 | 0.704634 |
| Si | Si302 | 0.836160 | 0.150890 | 0.810690 |
| Si | Si303 | 0.831798 | 0.305603 | 0.800441 |
| Si | Si304 | 0.722265 | 0.807025 | 0.295650 |
| Zn | Zn305 | 0.409051 | 0.737356 | 0.398494 |

**C<sub>6</sub>H<sub>8</sub>-Phys.Ads-Zn<sup>2+</sup> (Fig. 9a/M1 in Green)** Total energy = -1935.71273093 eV

data\_

\_audit\_creation\_method 'Materials Studio'

|                                |     |           |          |          |
|--------------------------------|-----|-----------|----------|----------|
| _cell_length_a                 |     | 20.357621 |          |          |
| _cell_length_b                 |     | 20.050598 |          |          |
| _cell_length_c                 |     | 13.476578 |          |          |
| _cell_angle_alpha              |     | 90.000000 |          |          |
| _cell_angle_beta               |     | 90.000000 |          |          |
| _cell_angle_gamma              |     | 90.000000 |          |          |
| _symmetry_space_group_name_H-M |     | 'P1'      |          |          |
| loop_                          |     |           |          |          |
| _atom_site_type_symbol         |     |           |          |          |
| _atom_site_label               |     |           |          |          |
| _atom_site_fract_x             |     |           |          |          |
| _atom_site_fract_y             |     |           |          |          |
| _atom_site_fract_z             |     |           |          |          |
| H                              | H1  | 0.525194  | 0.630125 | 0.453197 |
| H                              | H2  | 0.587368  | 0.679075 | 0.506339 |
| H                              | H3  | 0.449021  | 0.652738 | 0.588473 |
| H                              | H4  | 0.523895  | 0.634995 | 0.644970 |
| H                              | H5  | 0.489648  | 0.738816 | 0.728740 |
| H                              | H6  | 0.486136  | 0.843289 | 0.633231 |
| H                              | H7  | 0.492732  | 0.841184 | 0.448740 |
| H                              | H8  | 0.529611  | 0.741010 | 0.361535 |
| C                              | C9  | 0.533724  | 0.675650 | 0.496087 |
| C                              | C10 | 0.499474  | 0.671569 | 0.597458 |
| C                              | C11 | 0.495072  | 0.737991 | 0.648456 |
| C                              | C12 | 0.492955  | 0.795704 | 0.596587 |
| C                              | C13 | 0.498015  | 0.794545 | 0.489322 |
| C                              | C14 | 0.513735  | 0.736998 | 0.438444 |
| O                              | O15 | 0.518234  | 0.025791 | 0.209536 |
| O                              | O16 | 0.027761  | 0.535324 | 0.714122 |
| O                              | O17 | 0.524079  | 0.439679 | 0.208544 |
| O                              | O18 | 0.019746  | 0.936910 | 0.700865 |
| O                              | O19 | 0.527142  | 0.947801 | 0.785982 |
| O                              | O20 | 0.015041  | 0.454396 | 0.286517 |
| O                              | O21 | 0.519481  | 0.540081 | 0.799236 |
| O                              | O22 | 0.027186  | 0.040265 | 0.289491 |
| O                              | O23 | 0.400088  | 0.057147 | 0.275851 |
| O                              | O24 | 0.150664  | 0.556768 | 0.763390 |
| O                              | O25 | 0.395767  | 0.426561 | 0.242030 |
| O                              | O26 | 0.142481  | 0.943379 | 0.757232 |
| O                              | O27 | 0.646064  | 0.922890 | 0.720082 |
| O                              | O28 | 0.894454  | 0.424596 | 0.230201 |
| O                              | O29 | 0.643213  | 0.532744 | 0.750488 |
| O                              | O30 | 0.902239  | 0.042335 | 0.238847 |
| O                              | O31 | 0.446287  | 0.114947 | 0.113487 |

|   |     |          |          |          |
|---|-----|----------|----------|----------|
| 0 | 032 | 0.102275 | 0.615293 | 0.603603 |
| 0 | 033 | 0.452503 | 0.363452 | 0.092364 |
| 0 | 034 | 0.107129 | 0.861574 | 0.610793 |
| 0 | 035 | 0.602955 | 0.862562 | 0.881436 |
| 0 | 036 | 0.944125 | 0.370379 | 0.393087 |
| 0 | 037 | 0.603099 | 0.616129 | 0.892158 |
| 0 | 038 | 0.946836 | 0.120137 | 0.384593 |
| 0 | 039 | 0.410893 | 0.987634 | 0.110263 |
| 0 | 040 | 0.123840 | 0.484836 | 0.604040 |
| 0 | 041 | 0.440963 | 0.495213 | 0.085114 |
| 0 | 042 | 0.106436 | 0.992091 | 0.580745 |
| 0 | 043 | 0.632417 | 0.992363 | 0.885161 |
| 0 | 044 | 0.910677 | 0.499284 | 0.387478 |
| 0 | 045 | 0.603186 | 0.485180 | 0.925556 |
| 0 | 046 | 0.939175 | 0.988876 | 0.411558 |
| 0 | 047 | 0.339439 | 0.058319 | 0.446621 |
| 0 | 048 | 0.216542 | 0.553332 | 0.928893 |
| 0 | 049 | 0.338131 | 0.425451 | 0.416090 |
| 0 | 050 | 0.205184 | 0.944386 | 0.927161 |
| 0 | 051 | 0.706200 | 0.926249 | 0.549639 |
| 0 | 052 | 0.832438 | 0.423742 | 0.061266 |
| 0 | 053 | 0.704561 | 0.543171 | 0.581492 |
| 0 | 054 | 0.841507 | 0.032624 | 0.066607 |
| 0 | 055 | 0.353921 | 0.942999 | 0.350573 |
| 0 | 056 | 0.192505 | 0.439886 | 0.831909 |
| 0 | 057 | 0.349491 | 0.539618 | 0.317861 |
| 0 | 058 | 0.219405 | 0.045925 | 0.802937 |
| 0 | 059 | 0.697749 | 0.036953 | 0.658885 |
| 0 | 060 | 0.849017 | 0.539112 | 0.155534 |
| 0 | 061 | 0.724258 | 0.435936 | 0.693405 |
| 0 | 062 | 0.834307 | 0.933074 | 0.195450 |
| 0 | 063 | 0.270970 | 0.035530 | 0.284059 |
| 0 | 064 | 0.277611 | 0.526266 | 0.761174 |
| 0 | 065 | 0.266689 | 0.445456 | 0.257407 |
| 0 | 066 | 0.271670 | 0.929419 | 0.759033 |
| 0 | 067 | 0.776525 | 0.937871 | 0.712511 |
| 0 | 068 | 0.765590 | 0.449857 | 0.225169 |
| 0 | 069 | 0.771873 | 0.552612 | 0.749440 |
| 0 | 070 | 0.772160 | 0.046394 | 0.230520 |
| 0 | 071 | 0.308862 | 0.125934 | 0.607254 |
| 0 | 072 | 0.226260 | 0.621756 | 0.092227 |
| 0 | 073 | 0.319488 | 0.363273 | 0.582755 |
| 0 | 074 | 0.216216 | 0.863195 | 0.077016 |
| 0 | 075 | 0.735405 | 0.857725 | 0.389906 |



|   |      |          |          |          |
|---|------|----------|----------|----------|
| 0 | 076  | 0.813347 | 0.353256 | 0.899059 |
| 0 | 077  | 0.715268 | 0.617659 | 0.424501 |
| 0 | 078  | 0.828497 | 0.111185 | 0.913760 |
| 0 | 079  | 0.226485 | 0.033260 | 0.538581 |
| 0 | 080  | 0.319850 | 0.534246 | 0.045924 |
| 0 | 081  | 0.220761 | 0.430307 | 0.502405 |
| 0 | 082  | 0.323370 | 0.922494 | 0.000056 |
| 0 | 083  | 0.819584 | 0.948820 | 0.456721 |
| 0 | 084  | 0.723268 | 0.441722 | 0.957479 |
| 0 | 085  | 0.822017 | 0.558652 | 0.501286 |
| 0 | 086  | 0.722215 | 0.054052 | 0.994285 |
| 0 | 087  | 0.338755 | 0.998286 | 0.622496 |
| 0 | 088  | 0.203272 | 0.489768 | 0.098803 |
| 0 | 089  | 0.321455 | 0.495695 | 0.580504 |
| 0 | 090  | 0.239017 | 0.993182 | 0.102971 |
| 0 | 091  | 0.707180 | 0.987427 | 0.377228 |
| 0 | 092  | 0.837002 | 0.482780 | 0.885695 |
| 0 | 093  | 0.732501 | 0.486749 | 0.408393 |
| 0 | 094  | 0.806173 | 0.981799 | 0.892621 |
| 0 | 095  | 0.135803 | 0.121156 | 0.590862 |
| 0 | 096  | 0.411177 | 0.623832 | 0.091835 |
| 0 | 097  | 0.126363 | 0.354230 | 0.581187 |
| 0 | 098  | 0.419560 | 0.856890 | 0.087958 |
| 0 | 099  | 0.908517 | 0.859271 | 0.402176 |
| 0 | 0100 | 0.628945 | 0.354727 | 0.916971 |
| 0 | 0101 | 0.922337 | 0.628099 | 0.430397 |
| 0 | 0102 | 0.625009 | 0.123336 | 0.913321 |
| 0 | 0103 | 0.125733 | 0.061014 | 0.417169 |
| 0 | 0104 | 0.416782 | 0.560736 | 0.918620 |
| 0 | 0105 | 0.100387 | 0.430662 | 0.428236 |
| 0 | 0106 | 0.446262 | 0.935225 | 0.937340 |
| 0 | 0107 | 0.920008 | 0.919000 | 0.575466 |
| 0 | 0108 | 0.627396 | 0.417445 | 0.089201 |
| 0 | 0109 | 0.942673 | 0.538399 | 0.568568 |
| 0 | 0110 | 0.599988 | 0.041879 | 0.060540 |
| 0 | 0111 | 0.147483 | 0.039133 | 0.224900 |
| 0 | 0112 | 0.403520 | 0.532963 | 0.724387 |
| 0 | 0113 | 0.138175 | 0.425504 | 0.239156 |
| 0 | 0114 | 0.402323 | 0.923020 | 0.751697 |
| 0 | 0115 | 0.900372 | 0.943359 | 0.768172 |
| 0 | 0116 | 0.642324 | 0.442384 | 0.282404 |
| 0 | 0117 | 0.902564 | 0.555313 | 0.755155 |
| 0 | 0118 | 0.642433 | 0.059434 | 0.245959 |
| 0 | 0119 | 0.107078 | 0.941019 | 0.342301 |

|   |      |          |          |          |
|---|------|----------|----------|----------|
| 0 | 0120 | 0.441416 | 0.439321 | 0.852542 |
| 0 | 0121 | 0.110710 | 0.541651 | 0.322874 |
| 0 | 0122 | 0.436835 | 0.041195 | 0.820782 |
| 0 | 0123 | 0.942182 | 0.038656 | 0.647743 |
| 0 | 0124 | 0.606663 | 0.538222 | 0.158401 |
| 0 | 0125 | 0.939810 | 0.436809 | 0.692084 |
| 0 | 0126 | 0.615505 | 0.938691 | 0.180698 |
| 0 | 0127 | 0.233062 | 0.121126 | 0.145158 |
| 0 | 0128 | 0.325870 | 0.619880 | 0.639903 |
| 0 | 0129 | 0.219825 | 0.358769 | 0.127219 |
| 0 | 0130 | 0.332655 | 0.865960 | 0.614359 |
| 0 | 0131 | 0.821668 | 0.855110 | 0.850541 |
| 0 | 0132 | 0.729388 | 0.360110 | 0.359702 |
| 0 | 0133 | 0.834816 | 0.615635 | 0.892863 |
| 0 | 0134 | 0.720031 | 0.120342 | 0.371895 |
| 0 | 0135 | 0.521646 | 0.848941 | 0.212929 |
| 0 | 0136 | 0.031449 | 0.344549 | 0.718809 |
| 0 | 0137 | 0.516970 | 0.627997 | 0.210055 |
| 0 | 0138 | 0.030603 | 0.127159 | 0.708757 |
| 0 | 0139 | 0.528689 | 0.131824 | 0.779224 |
| 0 | 0140 | 0.016228 | 0.630781 | 0.292469 |
| 0 | 0141 | 0.529714 | 0.351252 | 0.788327 |
| 0 | 0142 | 0.016245 | 0.852593 | 0.290607 |
| 0 | 0143 | 0.404465 | 0.816305 | 0.276153 |
| 0 | 0144 | 0.155384 | 0.321644 | 0.767113 |
| 0 | 0145 | 0.402000 | 0.668727 | 0.279649 |
| 0 | 0146 | 0.147350 | 0.154353 | 0.782348 |
| 0 | 0147 | 0.651512 | 0.152202 | 0.725628 |
| 0 | 0148 | 0.893192 | 0.650060 | 0.241900 |
| 0 | 0149 | 0.650047 | 0.329548 | 0.724921 |
| 0 | 0150 | 0.900910 | 0.820941 | 0.213567 |
| 0 | 0151 | 0.464073 | 0.739614 | 0.142940 |
| 0 | 0152 | 0.092839 | 0.236945 | 0.651414 |
| 0 | 0153 | 0.592146 | 0.240247 | 0.841294 |
| 0 | 0154 | 0.954824 | 0.742048 | 0.348563 |
| 0 | 0155 | 0.335826 | 0.810742 | 0.436205 |
| 0 | 0156 | 0.216916 | 0.330476 | 0.936221 |
| 0 | 0157 | 0.341432 | 0.659961 | 0.450551 |
| 0 | 0158 | 0.210629 | 0.134932 | 0.952099 |
| 0 | 0159 | 0.718894 | 0.149799 | 0.562683 |
| 0 | 0160 | 0.826601 | 0.658620 | 0.078596 |
| 0 | 0161 | 0.710761 | 0.341744 | 0.553204 |
| 0 | 0162 | 0.837697 | 0.844218 | 0.045550 |
| 0 | 0163 | 0.265326 | 0.848756 | 0.257798 |

|    |       |          |          |          |
|----|-------|----------|----------|----------|
| 0  | 0164  | 0.282968 | 0.353462 | 0.771312 |
| 0  | 0165  | 0.259977 | 0.649592 | 0.278922 |
| 0  | 0166  | 0.278774 | 0.161947 | 0.792528 |
| 0  | 0167  | 0.780014 | 0.126074 | 0.732747 |
| 0  | 0168  | 0.765547 | 0.621272 | 0.243182 |
| 0  | 0169  | 0.781279 | 0.319547 | 0.713422 |
| 0  | 0170  | 0.769318 | 0.819684 | 0.206549 |
| 0  | 0171  | 0.296662 | 0.740931 | 0.590667 |
| 0  | 0172  | 0.249000 | 0.237853 | 0.065380 |
| 0  | 0173  | 0.747310 | 0.242131 | 0.431674 |
| 0  | 0174  | 0.801639 | 0.740010 | 0.931794 |
| 0  | 0175  | 0.220474 | 0.838973 | 0.520322 |
| 0  | 0176  | 0.331506 | 0.338161 | 0.029975 |
| 0  | 0177  | 0.220982 | 0.639365 | 0.526331 |
| 0  | 0178  | 0.332609 | 0.139705 | 0.020762 |
| 0  | 0179  | 0.832159 | 0.144021 | 0.467210 |
| 0  | 0180  | 0.718537 | 0.640973 | 0.972685 |
| 0  | 0181  | 0.830931 | 0.339843 | 0.480186 |
| 0  | 0182  | 0.718254 | 0.839566 | 0.968807 |
| 0  | 0183  | 0.138725 | 0.738877 | 0.565640 |
| 0  | 0184  | 0.415138 | 0.238320 | 0.067326 |
| 0  | 0185  | 0.915878 | 0.244393 | 0.430796 |
| 0  | 0186  | 0.634787 | 0.740066 | 0.930840 |
| 0  | 0187  | 0.108995 | 0.821804 | 0.420921 |
| 0  | 0188  | 0.433445 | 0.314621 | 0.911300 |
| 0  | 0189  | 0.112939 | 0.656612 | 0.418030 |
| 0  | 0190  | 0.445450 | 0.152349 | 0.925524 |
| 0  | 0191  | 0.940655 | 0.159731 | 0.574207 |
| 0  | 0192  | 0.610419 | 0.658544 | 0.079741 |
| 0  | 0193  | 0.942693 | 0.328055 | 0.578448 |
| 0  | 0194  | 0.607802 | 0.828856 | 0.070427 |
| 0  | 0195  | 0.137052 | 0.836087 | 0.228092 |
| 0  | 0196  | 0.408357 | 0.344548 | 0.723127 |
| 0  | 0197  | 0.134799 | 0.653793 | 0.223638 |
| 0  | 0198  | 0.404071 | 0.155032 | 0.737303 |
| 0  | 0199  | 0.907452 | 0.140587 | 0.763056 |
| 0  | 0200  | 0.638305 | 0.643266 | 0.270872 |
| 0  | 0201  | 0.907039 | 0.320879 | 0.767954 |
| 0  | 0202  | 0.643706 | 0.821437 | 0.259849 |
| 0  | 0203  | 0.217729 | 0.744493 | 0.155247 |
| 0  | 0204  | 0.326256 | 0.248515 | 0.666444 |
| 0  | 0205  | 0.825261 | 0.229907 | 0.838294 |
| 0  | 0206  | 0.724519 | 0.732483 | 0.336200 |
| Al | Al207 | 0.335586 | 0.861068 | 0.325215 |

|    |       |          |          |          |
|----|-------|----------|----------|----------|
| Al | Al208 | 0.332989 | 0.622951 | 0.329269 |
| Si | Si209 | 0.711375 | 0.653917 | 0.317159 |
| Si | Si210 | 0.443917 | 0.046362 | 0.177310 |
| Si | Si211 | 0.100968 | 0.548058 | 0.670482 |
| Si | Si212 | 0.452025 | 0.431397 | 0.158082 |
| Si | Si213 | 0.094926 | 0.933529 | 0.662255 |
| Si | Si214 | 0.602004 | 0.931916 | 0.819374 |
| Si | Si215 | 0.941769 | 0.437114 | 0.325315 |
| Si | Si216 | 0.593401 | 0.543086 | 0.842610 |
| Si | Si217 | 0.953150 | 0.047808 | 0.331112 |
| Si | Si218 | 0.341166 | 0.021472 | 0.338805 |
| Si | Si219 | 0.209251 | 0.518772 | 0.821736 |
| Si | Si220 | 0.337649 | 0.461144 | 0.307564 |
| Si | Si221 | 0.209595 | 0.965771 | 0.812039 |
| Si | Si222 | 0.707010 | 0.956609 | 0.660915 |
| Si | Si223 | 0.835375 | 0.459583 | 0.168720 |
| Si | Si224 | 0.711254 | 0.515747 | 0.694086 |
| Si | Si225 | 0.837765 | 0.013664 | 0.183137 |
| Si | Si226 | 0.303290 | 0.054097 | 0.553005 |
| Si | Si227 | 0.241207 | 0.550341 | 0.042825 |
| Si | Si228 | 0.299694 | 0.428811 | 0.520432 |
| Si | Si229 | 0.245685 | 0.930297 | 0.028520 |
| Si | Si230 | 0.742512 | 0.929920 | 0.442823 |
| Si | Si231 | 0.801444 | 0.425138 | 0.950799 |
| Si | Si232 | 0.744123 | 0.551340 | 0.478001 |
| Si | Si233 | 0.799522 | 0.045027 | 0.966444 |
| Si | Si234 | 0.149000 | 0.052082 | 0.531489 |
| Si | Si235 | 0.396699 | 0.553422 | 0.035297 |
| Si | Si236 | 0.143352 | 0.425029 | 0.528787 |
| Si | Si237 | 0.399471 | 0.926276 | 0.034016 |
| Si | Si238 | 0.897008 | 0.928819 | 0.461106 |
| Si | Si239 | 0.645983 | 0.424338 | 0.972647 |
| Si | Si240 | 0.899312 | 0.555864 | 0.471948 |
| Si | Si241 | 0.645231 | 0.052792 | 0.963249 |
| Si | Si242 | 0.101874 | 0.020242 | 0.318858 |
| Si | Si243 | 0.444734 | 0.518069 | 0.824642 |
| Si | Si244 | 0.091479 | 0.463130 | 0.318606 |
| Si | Si245 | 0.452838 | 0.962150 | 0.824133 |
| Si | Si246 | 0.945918 | 0.959483 | 0.672627 |
| Si | Si247 | 0.599518 | 0.459140 | 0.184168 |
| Si | Si248 | 0.953273 | 0.516290 | 0.683120 |
| Si | Si249 | 0.593781 | 0.016859 | 0.174730 |
| Si | Si250 | 0.223223 | 0.046607 | 0.189737 |
| Si | Si251 | 0.331177 | 0.542988 | 0.676605 |

|    |       |          |          |          |
|----|-------|----------|----------|----------|
| Si | Si252 | 0.207781 | 0.430167 | 0.180692 |
| Si | Si253 | 0.335352 | 0.930143 | 0.686969 |
| Si | Si254 | 0.826231 | 0.930005 | 0.805752 |
| Si | Si255 | 0.717816 | 0.435052 | 0.318786 |
| Si | Si256 | 0.836238 | 0.551051 | 0.820909 |
| Si | Si257 | 0.710985 | 0.053231 | 0.306811 |
| Si | Si258 | 0.451833 | 0.816078 | 0.179043 |
| Si | Si259 | 0.101340 | 0.314872 | 0.679576 |
| Si | Si260 | 0.448024 | 0.664208 | 0.180144 |
| Si | Si261 | 0.101806 | 0.159755 | 0.683545 |
| Si | Si262 | 0.599095 | 0.161914 | 0.814743 |
| Si | Si263 | 0.947183 | 0.662952 | 0.327945 |
| Si | Si264 | 0.600230 | 0.318844 | 0.817656 |
| Si | Si265 | 0.945728 | 0.818749 | 0.313758 |
| Si | Si266 | 0.212236 | 0.361577 | 0.826178 |
| Si | Si267 | 0.213338 | 0.124112 | 0.832824 |
| Si | Si268 | 0.712394 | 0.116006 | 0.670676 |
| Si | Si269 | 0.833877 | 0.616761 | 0.180468 |
| Si | Si270 | 0.716018 | 0.356744 | 0.671312 |
| Si | Si271 | 0.836149 | 0.854772 | 0.164913 |
| Si | Si272 | 0.295495 | 0.814795 | 0.541202 |
| Si | Si273 | 0.254498 | 0.316351 | 0.039950 |
| Si | Si274 | 0.295582 | 0.664362 | 0.550501 |
| Si | Si275 | 0.256232 | 0.158780 | 0.045184 |
| Si | Si276 | 0.754887 | 0.163898 | 0.457930 |
| Si | Si277 | 0.795454 | 0.663593 | 0.968440 |
| Si | Si278 | 0.754677 | 0.320506 | 0.457090 |
| Si | Si279 | 0.795000 | 0.819353 | 0.950318 |
| Si | Si280 | 0.143466 | 0.815752 | 0.528797 |
| Si | Si281 | 0.407845 | 0.313908 | 0.025786 |
| Si | Si282 | 0.143647 | 0.662134 | 0.528090 |
| Si | Si283 | 0.409479 | 0.161082 | 0.032063 |
| Si | Si284 | 0.909039 | 0.166809 | 0.464100 |
| Si | Si285 | 0.641847 | 0.663701 | 0.969282 |
| Si | Si286 | 0.908462 | 0.320552 | 0.470615 |
| Si | Si287 | 0.641358 | 0.817843 | 0.962917 |
| Si | Si288 | 0.093178 | 0.862816 | 0.319453 |
| Si | Si289 | 0.453305 | 0.362369 | 0.818719 |
| Si | Si290 | 0.094121 | 0.620710 | 0.313868 |
| Si | Si291 | 0.453468 | 0.120285 | 0.815907 |
| Si | Si292 | 0.955185 | 0.116487 | 0.673677 |
| Si | Si293 | 0.593296 | 0.616486 | 0.179412 |
| Si | Si294 | 0.955300 | 0.357558 | 0.688933 |
| Si | Si295 | 0.597493 | 0.859970 | 0.180078 |

|    |       |          |          |          |
|----|-------|----------|----------|----------|
| Si | Si296 | 0.210344 | 0.822973 | 0.182025 |
| Si | Si297 | 0.334078 | 0.327213 | 0.687060 |
| Si | Si298 | 0.210937 | 0.667360 | 0.189715 |
| Si | Si299 | 0.329837 | 0.171716 | 0.700786 |
| Si | Si300 | 0.835311 | 0.152094 | 0.810852 |
| Si | Si301 | 0.832307 | 0.306932 | 0.804718 |
| Si | Si302 | 0.718437 | 0.808782 | 0.298069 |
| Zn | Zn303 | 0.405760 | 0.740626 | 0.393033 |

**TS-C<sub>6</sub>H<sub>8</sub>-Dehydro-Zn<sup>2+</sup> (Fig. 9a/TS1 in Green)** Total energy = -1932.98416549 eV

data\_

\_audit\_creation\_method 'Materials Studio'

\_cell\_length\_a 20.357621

\_cell\_length\_b 20.050598

\_cell\_length\_c 13.476578

\_cell\_angle\_alpha 90.000000

\_cell\_angle\_beta 90.000000

\_cell\_angle\_gamma 90.000000

\_symmetry\_space\_group\_name\_H-M 'P1'

loop\_

\_atom\_site\_type\_symbol

\_atom\_site\_label

\_atom\_site\_fract\_x

\_atom\_site\_fract\_y

\_atom\_site\_fract\_z

|   |     |          |          |          |
|---|-----|----------|----------|----------|
| H | H1  | 0.434832 | 0.752191 | 0.641892 |
| H | H2  | 0.520962 | 0.751731 | 0.639972 |
| H | H3  | 0.405519 | 0.690787 | 0.485187 |
| H | H4  | 0.494132 | 0.781090 | 0.479407 |
| H | H5  | 0.548684 | 0.694404 | 0.381181 |
| H | H6  | 0.570775 | 0.586524 | 0.461430 |
| H | H7  | 0.510353 | 0.555712 | 0.617093 |
| H | H8  | 0.459174 | 0.643821 | 0.718178 |
| C | C9  | 0.477110 | 0.725726 | 0.610890 |
| C | C10 | 0.478355 | 0.729399 | 0.496729 |
| C | C11 | 0.526281 | 0.681847 | 0.451725 |
| C | C12 | 0.538207 | 0.622676 | 0.495642 |
| C | C13 | 0.507560 | 0.606563 | 0.590209 |
| C | C14 | 0.478936 | 0.654463 | 0.645456 |
| O | O15 | 0.512241 | 0.027884 | 0.212380 |
| O | O16 | 0.020707 | 0.549147 | 0.717644 |
| O | O17 | 0.524662 | 0.437546 | 0.220738 |
| O | O18 | 0.009449 | 0.933516 | 0.692863 |

|   |     |          |          |          |
|---|-----|----------|----------|----------|
| 0 | 019 | 0.515997 | 0.942606 | 0.788225 |
| 0 | 020 | 0.017484 | 0.457463 | 0.299889 |
| 0 | 021 | 0.512936 | 0.540334 | 0.809480 |
| 0 | 022 | 0.019644 | 0.041153 | 0.287636 |
| 0 | 023 | 0.393846 | 0.063199 | 0.278587 |
| 0 | 024 | 0.135800 | 0.558440 | 0.801549 |
| 0 | 025 | 0.401590 | 0.431418 | 0.282719 |
| 0 | 026 | 0.129156 | 0.954615 | 0.761893 |
| 0 | 027 | 0.631919 | 0.946442 | 0.706509 |
| 0 | 028 | 0.899969 | 0.432986 | 0.226242 |
| 0 | 029 | 0.633042 | 0.529118 | 0.739359 |
| 0 | 030 | 0.894728 | 0.054485 | 0.233967 |
| 0 | 031 | 0.438615 | 0.109746 | 0.106855 |
| 0 | 032 | 0.114533 | 0.625096 | 0.637281 |
| 0 | 033 | 0.440644 | 0.358680 | 0.129808 |
| 0 | 034 | 0.108436 | 0.867060 | 0.616486 |
| 0 | 035 | 0.610043 | 0.859651 | 0.850208 |
| 0 | 036 | 0.938900 | 0.373221 | 0.391722 |
| 0 | 037 | 0.605876 | 0.617565 | 0.880921 |
| 0 | 038 | 0.942594 | 0.122012 | 0.387695 |
| 0 | 039 | 0.403187 | 0.982683 | 0.124966 |
| 0 | 040 | 0.125354 | 0.493358 | 0.631098 |
| 0 | 041 | 0.432880 | 0.490348 | 0.109698 |
| 0 | 042 | 0.096108 | 0.996764 | 0.581409 |
| 0 | 043 | 0.618881 | 0.988186 | 0.891906 |
| 0 | 044 | 0.908536 | 0.502671 | 0.390176 |
| 0 | 045 | 0.603915 | 0.487624 | 0.922490 |
| 0 | 046 | 0.927473 | 0.990739 | 0.401447 |
| 0 | 047 | 0.327664 | 0.066535 | 0.446412 |
| 0 | 048 | 0.202252 | 0.552523 | 0.966217 |
| 0 | 049 | 0.339061 | 0.442392 | 0.453103 |
| 0 | 050 | 0.197940 | 0.941018 | 0.924522 |
| 0 | 051 | 0.703163 | 0.928893 | 0.549315 |
| 0 | 052 | 0.836758 | 0.428817 | 0.057734 |
| 0 | 053 | 0.699017 | 0.550686 | 0.575082 |
| 0 | 054 | 0.832895 | 0.049278 | 0.060788 |
| 0 | 055 | 0.352524 | 0.949735 | 0.360419 |
| 0 | 056 | 0.194213 | 0.445523 | 0.847024 |
| 0 | 057 | 0.344769 | 0.545861 | 0.330758 |
| 0 | 058 | 0.216348 | 0.048104 | 0.813060 |
| 0 | 059 | 0.712396 | 0.043461 | 0.650126 |
| 0 | 060 | 0.852272 | 0.545287 | 0.147035 |
| 0 | 061 | 0.721969 | 0.440394 | 0.679373 |
| 0 | 062 | 0.846056 | 0.940091 | 0.170653 |

|   |      |          |          |          |
|---|------|----------|----------|----------|
| 0 | 063  | 0.265855 | 0.032394 | 0.281176 |
| 0 | 064  | 0.266351 | 0.549166 | 0.796398 |
| 0 | 065  | 0.271570 | 0.439756 | 0.287323 |
| 0 | 066  | 0.257299 | 0.931813 | 0.747902 |
| 0 | 067  | 0.762383 | 0.933437 | 0.722745 |
| 0 | 068  | 0.770699 | 0.456853 | 0.222803 |
| 0 | 069  | 0.760853 | 0.556263 | 0.749233 |
| 0 | 070  | 0.765020 | 0.036221 | 0.225887 |
| 0 | 071  | 0.296624 | 0.134074 | 0.607057 |
| 0 | 072  | 0.229290 | 0.620133 | 0.128382 |
| 0 | 073  | 0.316544 | 0.378561 | 0.617406 |
| 0 | 074  | 0.211248 | 0.862433 | 0.076462 |
| 0 | 075  | 0.711378 | 0.864116 | 0.381938 |
| 0 | 076  | 0.805824 | 0.355172 | 0.901862 |
| 0 | 077  | 0.718522 | 0.625796 | 0.417924 |
| 0 | 078  | 0.805093 | 0.118994 | 0.900427 |
| 0 | 079  | 0.215509 | 0.040224 | 0.540306 |
| 0 | 080  | 0.315235 | 0.532402 | 0.058767 |
| 0 | 081  | 0.216500 | 0.434711 | 0.519960 |
| 0 | 082  | 0.315755 | 0.927825 | 0.001970 |
| 0 | 083  | 0.810133 | 0.943269 | 0.438423 |
| 0 | 084  | 0.721720 | 0.445629 | 0.970800 |
| 0 | 085  | 0.819286 | 0.561107 | 0.504808 |
| 0 | 086  | 0.710780 | 0.052581 | 0.992621 |
| 0 | 087  | 0.328626 | 0.007497 | 0.624440 |
| 0 | 088  | 0.203969 | 0.488813 | 0.135625 |
| 0 | 089  | 0.301915 | 0.509457 | 0.614082 |
| 0 | 090  | 0.225498 | 0.994082 | 0.100720 |
| 0 | 091  | 0.697747 | 0.996756 | 0.382863 |
| 0 | 092  | 0.830126 | 0.483319 | 0.877919 |
| 0 | 093  | 0.730455 | 0.494737 | 0.402780 |
| 0 | 094  | 0.801510 | 0.986637 | 0.893537 |
| 0 | 095  | 0.123372 | 0.126365 | 0.595115 |
| 0 | 096  | 0.406036 | 0.620486 | 0.113068 |
| 0 | 097  | 0.122975 | 0.362596 | 0.603936 |
| 0 | 098  | 0.409943 | 0.854909 | 0.082640 |
| 0 | 099  | 0.906728 | 0.859293 | 0.399690 |
| 0 | 0100 | 0.632652 | 0.357780 | 0.911019 |
| 0 | 0101 | 0.909329 | 0.634299 | 0.416032 |
| 0 | 0102 | 0.617025 | 0.120686 | 0.899436 |
| 0 | 0103 | 0.114279 | 0.067958 | 0.419821 |
| 0 | 0104 | 0.418009 | 0.558108 | 0.942805 |
| 0 | 0105 | 0.093770 | 0.443368 | 0.455680 |
| 0 | 0106 | 0.438928 | 0.943137 | 0.944133 |



|   |      |          |          |          |
|---|------|----------|----------|----------|
| 0 | 0107 | 0.907177 | 0.924417 | 0.568718 |
| 0 | 0108 | 0.618446 | 0.416543 | 0.085341 |
| 0 | 0109 | 0.943625 | 0.555886 | 0.562700 |
| 0 | 0110 | 0.588532 | 0.050100 | 0.058367 |
| 0 | 0111 | 0.140927 | 0.043719 | 0.229253 |
| 0 | 0112 | 0.391250 | 0.533944 | 0.752602 |
| 0 | 0113 | 0.142327 | 0.420322 | 0.274920 |
| 0 | 0114 | 0.387796 | 0.934790 | 0.762467 |
| 0 | 0115 | 0.889750 | 0.954614 | 0.758253 |
| 0 | 0116 | 0.646380 | 0.444991 | 0.274351 |
| 0 | 0117 | 0.892079 | 0.554696 | 0.743317 |
| 0 | 0118 | 0.637161 | 0.063415 | 0.240631 |
| 0 | 0119 | 0.103695 | 0.946168 | 0.348652 |
| 0 | 0120 | 0.439247 | 0.438488 | 0.868078 |
| 0 | 0121 | 0.115205 | 0.543186 | 0.329244 |
| 0 | 0122 | 0.439761 | 0.047816 | 0.825782 |
| 0 | 0123 | 0.944452 | 0.041728 | 0.635670 |
| 0 | 0124 | 0.599725 | 0.537962 | 0.153476 |
| 0 | 0125 | 0.945661 | 0.445456 | 0.666857 |
| 0 | 0126 | 0.610985 | 0.943764 | 0.172026 |
| 0 | 0127 | 0.228523 | 0.121615 | 0.148727 |
| 0 | 0128 | 0.322338 | 0.631959 | 0.669487 |
| 0 | 0129 | 0.222267 | 0.357133 | 0.154970 |
| 0 | 0130 | 0.332450 | 0.875702 | 0.611684 |
| 0 | 0131 | 0.824985 | 0.860122 | 0.852097 |
| 0 | 0132 | 0.734740 | 0.367535 | 0.357225 |
| 0 | 0133 | 0.830755 | 0.615747 | 0.887330 |
| 0 | 0134 | 0.721197 | 0.126578 | 0.353385 |
| 0 | 0135 | 0.518944 | 0.852215 | 0.195227 |
| 0 | 0136 | 0.022913 | 0.347468 | 0.729864 |
| 0 | 0137 | 0.518802 | 0.633366 | 0.213230 |
| 0 | 0138 | 0.019288 | 0.137133 | 0.714775 |
| 0 | 0139 | 0.518019 | 0.148106 | 0.775384 |
| 0 | 0140 | 0.018526 | 0.630250 | 0.307628 |
| 0 | 0141 | 0.524686 | 0.347989 | 0.800474 |
| 0 | 0142 | 0.016171 | 0.857363 | 0.291359 |
| 0 | 0143 | 0.405582 | 0.825449 | 0.276284 |
| 0 | 0144 | 0.144570 | 0.329179 | 0.792517 |
| 0 | 0145 | 0.405182 | 0.673652 | 0.293965 |
| 0 | 0146 | 0.136415 | 0.150907 | 0.789835 |
| 0 | 0147 | 0.638323 | 0.145812 | 0.708527 |
| 0 | 0148 | 0.904352 | 0.655133 | 0.223008 |
| 0 | 0149 | 0.639519 | 0.340488 | 0.714617 |
| 0 | 0150 | 0.902360 | 0.824719 | 0.209628 |

|   |      |          |          |          |
|---|------|----------|----------|----------|
| 0 | 0151 | 0.457376 | 0.740387 | 0.145477 |
| 0 | 0152 | 0.091653 | 0.243206 | 0.666215 |
| 0 | 0153 | 0.601949 | 0.242153 | 0.833570 |
| 0 | 0154 | 0.957779 | 0.745083 | 0.342945 |
| 0 | 0155 | 0.333306 | 0.817117 | 0.434339 |
| 0 | 0156 | 0.206131 | 0.340431 | 0.962888 |
| 0 | 0157 | 0.352181 | 0.658328 | 0.477827 |
| 0 | 0158 | 0.201975 | 0.139647 | 0.957427 |
| 0 | 0159 | 0.706825 | 0.153708 | 0.544630 |
| 0 | 0160 | 0.828232 | 0.664652 | 0.069877 |
| 0 | 0161 | 0.706483 | 0.342006 | 0.547824 |
| 0 | 0162 | 0.836018 | 0.838380 | 0.043667 |
| 0 | 0163 | 0.267290 | 0.858728 | 0.252585 |
| 0 | 0164 | 0.274602 | 0.347358 | 0.797508 |
| 0 | 0165 | 0.265168 | 0.665011 | 0.307218 |
| 0 | 0166 | 0.266709 | 0.167792 | 0.793965 |
| 0 | 0167 | 0.768653 | 0.153025 | 0.717265 |
| 0 | 0168 | 0.775385 | 0.630246 | 0.242105 |
| 0 | 0169 | 0.769198 | 0.321107 | 0.717810 |
| 0 | 0170 | 0.771671 | 0.835721 | 0.212301 |
| 0 | 0171 | 0.300122 | 0.750118 | 0.595788 |
| 0 | 0172 | 0.242978 | 0.239413 | 0.074541 |
| 0 | 0173 | 0.745519 | 0.247207 | 0.420649 |
| 0 | 0174 | 0.799411 | 0.741271 | 0.918542 |
| 0 | 0175 | 0.219933 | 0.844386 | 0.521174 |
| 0 | 0176 | 0.326746 | 0.338041 | 0.038919 |
| 0 | 0177 | 0.225847 | 0.647029 | 0.535942 |
| 0 | 0178 | 0.324798 | 0.141389 | 0.019834 |
| 0 | 0179 | 0.826318 | 0.147822 | 0.465333 |
| 0 | 0180 | 0.716963 | 0.644718 | 0.974242 |
| 0 | 0181 | 0.828962 | 0.340745 | 0.487605 |
| 0 | 0182 | 0.717355 | 0.840219 | 0.962190 |
| 0 | 0183 | 0.140702 | 0.744735 | 0.571920 |
| 0 | 0184 | 0.406693 | 0.235786 | 0.082990 |
| 0 | 0185 | 0.912303 | 0.247053 | 0.427950 |
| 0 | 0186 | 0.632449 | 0.741653 | 0.926087 |
| 0 | 0187 | 0.106474 | 0.826450 | 0.426967 |
| 0 | 0188 | 0.438783 | 0.318388 | 0.941465 |
| 0 | 0189 | 0.109141 | 0.648649 | 0.445628 |
| 0 | 0190 | 0.436734 | 0.161033 | 0.926250 |
| 0 | 0191 | 0.932039 | 0.165212 | 0.575723 |
| 0 | 0192 | 0.604301 | 0.657217 | 0.070213 |
| 0 | 0193 | 0.943582 | 0.328437 | 0.576938 |
| 0 | 0194 | 0.599423 | 0.843366 | 0.043431 |

|    |       |          |          |          |
|----|-------|----------|----------|----------|
| O  | O195  | 0.138518 | 0.841254 | 0.236350 |
| O  | O196  | 0.400728 | 0.337714 | 0.754122 |
| O  | O197  | 0.138927 | 0.663311 | 0.254848 |
| O  | O198  | 0.391491 | 0.155755 | 0.740096 |
| O  | O199  | 0.893960 | 0.130728 | 0.758827 |
| O  | O200  | 0.645279 | 0.641220 | 0.256580 |
| O  | O201  | 0.895247 | 0.342206 | 0.760132 |
| O  | O202  | 0.642954 | 0.820799 | 0.226525 |
| O  | O203  | 0.219412 | 0.747689 | 0.167967 |
| O  | O204  | 0.317469 | 0.254419 | 0.670589 |
| O  | O205  | 0.833752 | 0.237020 | 0.832092 |
| O  | O206  | 0.721573 | 0.739248 | 0.322439 |
| Al | Al207 | 0.334687 | 0.869549 | 0.325931 |
| Al | Al208 | 0.337446 | 0.629675 | 0.348204 |
| Si | Si209 | 0.715216 | 0.659348 | 0.308380 |
| Si | Si210 | 0.437136 | 0.046194 | 0.180973 |
| Si | Si211 | 0.098585 | 0.556288 | 0.695498 |
| Si | Si212 | 0.448718 | 0.429639 | 0.186333 |
| Si | Si213 | 0.086547 | 0.938029 | 0.663235 |
| Si | Si214 | 0.593778 | 0.934431 | 0.810252 |
| Si | Si215 | 0.941756 | 0.441643 | 0.328034 |
| Si | Si216 | 0.589940 | 0.543736 | 0.838286 |
| Si | Si217 | 0.945391 | 0.051985 | 0.327262 |
| Si | Si218 | 0.335138 | 0.026662 | 0.341562 |
| Si | Si219 | 0.199908 | 0.525936 | 0.853503 |
| Si | Si220 | 0.339135 | 0.466405 | 0.337685 |
| Si | Si221 | 0.200151 | 0.968732 | 0.812243 |
| Si | Si222 | 0.702542 | 0.963488 | 0.657510 |
| Si | Si223 | 0.839910 | 0.466043 | 0.164359 |
| Si | Si224 | 0.703702 | 0.519179 | 0.685807 |
| Si | Si225 | 0.834736 | 0.020148 | 0.173206 |
| Si | Si226 | 0.292210 | 0.061911 | 0.553498 |
| Si | Si227 | 0.237518 | 0.549297 | 0.073810 |
| Si | Si228 | 0.293507 | 0.440913 | 0.550892 |
| Si | Si229 | 0.237401 | 0.931078 | 0.027794 |
| Si | Si230 | 0.731127 | 0.933009 | 0.437393 |
| Si | Si231 | 0.798754 | 0.428161 | 0.952154 |
| Si | Si232 | 0.742017 | 0.558371 | 0.474347 |
| Si | Si233 | 0.787992 | 0.051866 | 0.961420 |
| Si | Si234 | 0.137716 | 0.058164 | 0.534011 |
| Si | Si235 | 0.392665 | 0.550075 | 0.056615 |
| Si | Si236 | 0.139822 | 0.433668 | 0.552753 |
| Si | Si237 | 0.391406 | 0.928028 | 0.037899 |
| Si | Si238 | 0.888035 | 0.929499 | 0.452172 |

|    |       |          |          |          |
|----|-------|----------|----------|----------|
| Si | Si239 | 0.644312 | 0.426392 | 0.972363 |
| Si | Si240 | 0.895241 | 0.562979 | 0.468227 |
| Si | Si241 | 0.634067 | 0.053167 | 0.959854 |
| Si | Si242 | 0.094368 | 0.024668 | 0.321762 |
| Si | Si243 | 0.440235 | 0.517491 | 0.844042 |
| Si | Si244 | 0.092297 | 0.465826 | 0.339515 |
| Si | Si245 | 0.445266 | 0.967485 | 0.829423 |
| Si | Si246 | 0.937959 | 0.963283 | 0.663837 |
| Si | Si247 | 0.596964 | 0.459241 | 0.183087 |
| Si | Si248 | 0.950269 | 0.525880 | 0.674105 |
| Si | Si249 | 0.586877 | 0.021483 | 0.171277 |
| Si | Si250 | 0.216033 | 0.046953 | 0.190477 |
| Si | Si251 | 0.320253 | 0.555017 | 0.709105 |
| Si | Si252 | 0.210684 | 0.426952 | 0.213107 |
| Si | Si253 | 0.325999 | 0.938479 | 0.687062 |
| Si | Si254 | 0.819788 | 0.934502 | 0.806001 |
| Si | Si255 | 0.721129 | 0.441387 | 0.313960 |
| Si | Si256 | 0.828179 | 0.551931 | 0.814088 |
| Si | Si257 | 0.705839 | 0.055702 | 0.300732 |
| Si | Si258 | 0.448018 | 0.818631 | 0.172914 |
| Si | Si259 | 0.095536 | 0.320755 | 0.698471 |
| Si | Si260 | 0.447092 | 0.665822 | 0.190658 |
| Si | Si261 | 0.092756 | 0.164340 | 0.691129 |
| Si | Si262 | 0.593686 | 0.164327 | 0.804284 |
| Si | Si263 | 0.948097 | 0.666424 | 0.322026 |
| Si | Si264 | 0.599372 | 0.321770 | 0.815099 |
| Si | Si265 | 0.946034 | 0.821797 | 0.310569 |
| Si | Si266 | 0.204847 | 0.365681 | 0.849233 |
| Si | Si267 | 0.204858 | 0.126356 | 0.838776 |
| Si | Si268 | 0.706413 | 0.123858 | 0.656003 |
| Si | Si269 | 0.839879 | 0.623477 | 0.171421 |
| Si | Si270 | 0.709162 | 0.360992 | 0.664939 |
| Si | Si271 | 0.839007 | 0.860023 | 0.159095 |
| Si | Si272 | 0.295616 | 0.822496 | 0.541217 |
| Si | Si273 | 0.249769 | 0.318787 | 0.058113 |
| Si | Si274 | 0.298489 | 0.671120 | 0.571078 |
| Si | Si275 | 0.249425 | 0.161036 | 0.049471 |
| Si | Si276 | 0.749996 | 0.168608 | 0.446010 |
| Si | Si277 | 0.793769 | 0.666260 | 0.961781 |
| Si | Si278 | 0.753756 | 0.324164 | 0.454006 |
| Si | Si279 | 0.794336 | 0.819820 | 0.945085 |
| Si | Si280 | 0.143267 | 0.821181 | 0.533344 |
| Si | Si281 | 0.402866 | 0.313370 | 0.048808 |
| Si | Si282 | 0.147386 | 0.666107 | 0.546914 |

|    |       |          |          |          |
|----|-------|----------|----------|----------|
| Si | Si283 | 0.401664 | 0.161799 | 0.034336 |
| Si | Si284 | 0.903373 | 0.170131 | 0.463552 |
| Si | Si285 | 0.639964 | 0.665141 | 0.962981 |
| Si | Si286 | 0.906262 | 0.322592 | 0.470883 |
| Si | Si287 | 0.640312 | 0.821010 | 0.945591 |
| Si | Si288 | 0.092085 | 0.867667 | 0.324867 |
| Si | Si289 | 0.450777 | 0.360571 | 0.840737 |
| Si | Si290 | 0.095764 | 0.621733 | 0.333896 |
| Si | Si291 | 0.445943 | 0.128081 | 0.817135 |
| Si | Si292 | 0.947310 | 0.118818 | 0.671598 |
| Si | Si293 | 0.592600 | 0.617217 | 0.173502 |
| Si | Si294 | 0.951558 | 0.365775 | 0.683397 |
| Si | Si295 | 0.593748 | 0.865279 | 0.158807 |
| Si | Si296 | 0.210132 | 0.827242 | 0.185719 |
| Si | Si297 | 0.326979 | 0.329698 | 0.710577 |
| Si | Si298 | 0.214479 | 0.673776 | 0.216427 |
| Si | Si299 | 0.318608 | 0.176902 | 0.703108 |
| Si | Si300 | 0.825283 | 0.159665 | 0.801526 |
| Si | Si301 | 0.826043 | 0.314578 | 0.802299 |
| Si | Si302 | 0.712304 | 0.815547 | 0.285994 |
| Zn | Zn303 | 0.412205 | 0.759129 | 0.387503 |

**M-C<sub>6</sub>H<sub>7</sub>Zn-OH-Zn<sup>2+</sup> (Fig. 9a/M2 in Green)** Total energy = -1934.29964616 eV

data\_

\_audit\_creation\_method 'Materials Studio'

\_cell\_length\_a 20.357621

\_cell\_length\_b 20.050598

\_cell\_length\_c 13.476578

\_cell\_angle\_alpha 90.000000

\_cell\_angle\_beta 90.000000

\_cell\_angle\_gamma 90.000000

\_symmetry\_space\_group\_name\_H-M 'P1'

loop\_

\_atom\_site\_type\_symbol

\_atom\_site\_label

\_atom\_site\_fract\_x

\_atom\_site\_fract\_y

\_atom\_site\_fract\_z

|   |    |          |          |          |
|---|----|----------|----------|----------|
| H | H1 | 0.463054 | 0.802556 | 0.621977 |
| H | H2 | 0.540592 | 0.766804 | 0.644744 |
| H | H3 | 0.386569 | 0.647382 | 0.508740 |
| H | H4 | 0.540436 | 0.809359 | 0.471639 |
| H | H5 | 0.581327 | 0.706853 | 0.394392 |
| H | H6 | 0.561939 | 0.598536 | 0.476407 |

|   |     |          |          |          |
|---|-----|----------|----------|----------|
| H | H7  | 0.472754 | 0.589686 | 0.604656 |
| H | H8  | 0.431450 | 0.690956 | 0.687369 |
| C | C9  | 0.495113 | 0.761316 | 0.600117 |
| C | C10 | 0.513185 | 0.763843 | 0.489823 |
| C | C11 | 0.548802 | 0.703328 | 0.457879 |
| C | C12 | 0.537524 | 0.643506 | 0.501805 |
| C | C13 | 0.488567 | 0.638742 | 0.579898 |
| C | C14 | 0.465368 | 0.694535 | 0.625383 |
| O | O15 | 0.512114 | 0.026729 | 0.212373 |
| O | O16 | 0.017170 | 0.542730 | 0.718189 |
| O | O17 | 0.523921 | 0.438685 | 0.214733 |
| O | O18 | 0.008833 | 0.934332 | 0.690709 |
| O | O19 | 0.515691 | 0.944264 | 0.785667 |
| O | O20 | 0.017896 | 0.453399 | 0.296436 |
| O | O21 | 0.511165 | 0.545689 | 0.804109 |
| O | O22 | 0.019740 | 0.042441 | 0.288910 |
| O | O23 | 0.393305 | 0.058552 | 0.278573 |
| O | O24 | 0.132965 | 0.557913 | 0.800749 |
| O | O25 | 0.403742 | 0.433421 | 0.287357 |
| O | O26 | 0.128402 | 0.948274 | 0.762489 |
| O | O27 | 0.632041 | 0.941830 | 0.705735 |
| O | O28 | 0.901012 | 0.432094 | 0.217736 |
| O | O29 | 0.629826 | 0.533527 | 0.731563 |
| O | O30 | 0.893759 | 0.054670 | 0.241031 |
| O | O31 | 0.438185 | 0.110071 | 0.110030 |
| O | O32 | 0.105007 | 0.626297 | 0.640517 |
| O | O33 | 0.437240 | 0.358057 | 0.132965 |
| O | O34 | 0.106071 | 0.868389 | 0.608374 |
| O | O35 | 0.607721 | 0.862500 | 0.856466 |
| O | O36 | 0.935667 | 0.370107 | 0.382829 |
| O | O37 | 0.605621 | 0.619151 | 0.878596 |
| O | O38 | 0.943249 | 0.119298 | 0.396068 |
| O | O39 | 0.404321 | 0.982012 | 0.120815 |
| O | O40 | 0.124254 | 0.495646 | 0.627328 |
| O | O41 | 0.426856 | 0.488731 | 0.109507 |
| O | O42 | 0.097233 | 0.999432 | 0.585669 |
| O | O43 | 0.618348 | 0.993244 | 0.885854 |
| O | O44 | 0.908651 | 0.500261 | 0.383653 |
| O | O45 | 0.602445 | 0.488583 | 0.913509 |
| O | O46 | 0.930379 | 0.987413 | 0.403175 |
| O | O47 | 0.330362 | 0.062130 | 0.448096 |
| O | O48 | 0.194623 | 0.548285 | 0.970709 |
| O | O49 | 0.339216 | 0.447999 | 0.456183 |
| O | O50 | 0.197342 | 0.942834 | 0.926929 |

|   |     |          |          |          |
|---|-----|----------|----------|----------|
| 0 | 051 | 0.707779 | 0.922784 | 0.552834 |
| 0 | 052 | 0.835011 | 0.426994 | 0.051148 |
| 0 | 053 | 0.698070 | 0.549285 | 0.568820 |
| 0 | 054 | 0.831834 | 0.051603 | 0.069129 |
| 0 | 055 | 0.348527 | 0.945135 | 0.358789 |
| 0 | 056 | 0.186074 | 0.442849 | 0.847697 |
| 0 | 057 | 0.338428 | 0.545490 | 0.323110 |
| 0 | 058 | 0.211174 | 0.046653 | 0.807022 |
| 0 | 059 | 0.699962 | 0.043274 | 0.633177 |
| 0 | 060 | 0.852947 | 0.543740 | 0.138640 |
| 0 | 061 | 0.714779 | 0.439367 | 0.676741 |
| 0 | 062 | 0.847784 | 0.940269 | 0.172433 |
| 0 | 063 | 0.264562 | 0.033149 | 0.284754 |
| 0 | 064 | 0.263427 | 0.543941 | 0.805918 |
| 0 | 065 | 0.273572 | 0.431787 | 0.290097 |
| 0 | 066 | 0.257032 | 0.929716 | 0.751855 |
| 0 | 067 | 0.762253 | 0.947153 | 0.727470 |
| 0 | 068 | 0.771622 | 0.456194 | 0.217864 |
| 0 | 069 | 0.758032 | 0.554583 | 0.744570 |
| 0 | 070 | 0.764688 | 0.033526 | 0.233895 |
| 0 | 071 | 0.301169 | 0.131211 | 0.607754 |
| 0 | 072 | 0.225419 | 0.618008 | 0.130437 |
| 0 | 073 | 0.313678 | 0.373735 | 0.610858 |
| 0 | 074 | 0.212946 | 0.860978 | 0.075426 |
| 0 | 075 | 0.714286 | 0.859981 | 0.383749 |
| 0 | 076 | 0.804550 | 0.355851 | 0.893161 |
| 0 | 077 | 0.720372 | 0.625730 | 0.414067 |
| 0 | 078 | 0.807706 | 0.117432 | 0.905474 |
| 0 | 079 | 0.216986 | 0.039924 | 0.540694 |
| 0 | 080 | 0.313318 | 0.537359 | 0.049185 |
| 0 | 081 | 0.215544 | 0.436436 | 0.518109 |
| 0 | 082 | 0.316481 | 0.926350 | 0.999763 |
| 0 | 083 | 0.810836 | 0.943355 | 0.435574 |
| 0 | 084 | 0.720308 | 0.446138 | 0.963409 |
| 0 | 085 | 0.818709 | 0.556297 | 0.499653 |
| 0 | 086 | 0.711727 | 0.050186 | 0.993667 |
| 0 | 087 | 0.328323 | 0.002979 | 0.625518 |
| 0 | 088 | 0.209038 | 0.486010 | 0.139242 |
| 0 | 089 | 0.300413 | 0.504463 | 0.624193 |
| 0 | 090 | 0.228297 | 0.991597 | 0.104255 |
| 0 | 091 | 0.695064 | 0.992100 | 0.386892 |
| 0 | 092 | 0.829668 | 0.484341 | 0.873335 |
| 0 | 093 | 0.727436 | 0.494672 | 0.395145 |
| 0 | 094 | 0.807183 | 0.984988 | 0.903596 |

|   |      |          |          |          |
|---|------|----------|----------|----------|
| 0 | 095  | 0.126128 | 0.128511 | 0.591930 |
| 0 | 096  | 0.404015 | 0.619355 | 0.122236 |
| 0 | 097  | 0.124230 | 0.363856 | 0.607128 |
| 0 | 098  | 0.409256 | 0.852744 | 0.084220 |
| 0 | 099  | 0.906269 | 0.856689 | 0.402323 |
| 0 | 0100 | 0.631298 | 0.358811 | 0.902727 |
| 0 | 0101 | 0.909283 | 0.631170 | 0.414998 |
| 0 | 0102 | 0.619903 | 0.124865 | 0.907768 |
| 0 | 0103 | 0.115910 | 0.066112 | 0.419600 |
| 0 | 0104 | 0.422025 | 0.562057 | 0.947255 |
| 0 | 0105 | 0.092347 | 0.440627 | 0.455079 |
| 0 | 0106 | 0.440052 | 0.938097 | 0.942646 |
| 0 | 0107 | 0.904850 | 0.924044 | 0.570714 |
| 0 | 0108 | 0.615953 | 0.417714 | 0.076577 |
| 0 | 0109 | 0.942695 | 0.549229 | 0.559291 |
| 0 | 0110 | 0.589833 | 0.047484 | 0.059752 |
| 0 | 0111 | 0.140647 | 0.041496 | 0.228399 |
| 0 | 0112 | 0.388787 | 0.541694 | 0.757421 |
| 0 | 0113 | 0.143547 | 0.418678 | 0.275840 |
| 0 | 0114 | 0.387928 | 0.929653 | 0.761711 |
| 0 | 0115 | 0.890587 | 0.952237 | 0.761638 |
| 0 | 0116 | 0.646584 | 0.441538 | 0.265350 |
| 0 | 0117 | 0.888889 | 0.558521 | 0.738246 |
| 0 | 0118 | 0.636906 | 0.061179 | 0.243763 |
| 0 | 0119 | 0.100617 | 0.944746 | 0.348121 |
| 0 | 0120 | 0.438323 | 0.443298 | 0.866080 |
| 0 | 0121 | 0.113299 | 0.541140 | 0.329828 |
| 0 | 0122 | 0.433932 | 0.044684 | 0.827516 |
| 0 | 0123 | 0.940212 | 0.042184 | 0.639252 |
| 0 | 0124 | 0.600674 | 0.538282 | 0.150203 |
| 0 | 0125 | 0.934967 | 0.443248 | 0.674723 |
| 0 | 0126 | 0.610475 | 0.941760 | 0.175507 |
| 0 | 0127 | 0.228367 | 0.119612 | 0.147158 |
| 0 | 0128 | 0.310369 | 0.629357 | 0.674647 |
| 0 | 0129 | 0.221128 | 0.353769 | 0.154379 |
| 0 | 0130 | 0.328439 | 0.870304 | 0.615295 |
| 0 | 0131 | 0.818321 | 0.860208 | 0.847956 |
| 0 | 0132 | 0.735666 | 0.367044 | 0.352027 |
| 0 | 0133 | 0.826025 | 0.616868 | 0.882575 |
| 0 | 0134 | 0.718291 | 0.122599 | 0.362494 |
| 0 | 0135 | 0.517070 | 0.851259 | 0.199125 |
| 0 | 0136 | 0.020596 | 0.349412 | 0.726264 |
| 0 | 0137 | 0.519125 | 0.631396 | 0.216526 |
| 0 | 0138 | 0.022011 | 0.133615 | 0.712146 |



|   |      |          |          |          |
|---|------|----------|----------|----------|
| 0 | 0139 | 0.521028 | 0.138149 | 0.779044 |
| 0 | 0140 | 0.015952 | 0.627138 | 0.301347 |
| 0 | 0141 | 0.521482 | 0.351547 | 0.796140 |
| 0 | 0142 | 0.013040 | 0.855794 | 0.288466 |
| 0 | 0143 | 0.403794 | 0.823542 | 0.277884 |
| 0 | 0144 | 0.139937 | 0.325347 | 0.794511 |
| 0 | 0145 | 0.408129 | 0.671159 | 0.304744 |
| 0 | 0146 | 0.139312 | 0.155282 | 0.785971 |
| 0 | 0147 | 0.642599 | 0.148639 | 0.716867 |
| 0 | 0148 | 0.901971 | 0.653469 | 0.221400 |
| 0 | 0149 | 0.635622 | 0.335989 | 0.707750 |
| 0 | 0150 | 0.897725 | 0.822263 | 0.211563 |
| 0 | 0151 | 0.456720 | 0.738293 | 0.150347 |
| 0 | 0152 | 0.087404 | 0.243716 | 0.662249 |
| 0 | 0153 | 0.593266 | 0.242885 | 0.833280 |
| 0 | 0154 | 0.956216 | 0.742643 | 0.341478 |
| 0 | 0155 | 0.334851 | 0.812887 | 0.437960 |
| 0 | 0156 | 0.204874 | 0.338194 | 0.961765 |
| 0 | 0157 | 0.340930 | 0.644969 | 0.483031 |
| 0 | 0158 | 0.202694 | 0.136171 | 0.955257 |
| 0 | 0159 | 0.708350 | 0.161343 | 0.551263 |
| 0 | 0160 | 0.828248 | 0.664060 | 0.066262 |
| 0 | 0161 | 0.704013 | 0.342420 | 0.541240 |
| 0 | 0162 | 0.835876 | 0.840716 | 0.041078 |
| 0 | 0163 | 0.263502 | 0.852694 | 0.256631 |
| 0 | 0164 | 0.269129 | 0.347958 | 0.791947 |
| 0 | 0165 | 0.264527 | 0.667931 | 0.305230 |
| 0 | 0166 | 0.270475 | 0.162621 | 0.794897 |
| 0 | 0167 | 0.773065 | 0.136094 | 0.717573 |
| 0 | 0168 | 0.774294 | 0.625123 | 0.236215 |
| 0 | 0169 | 0.766000 | 0.321199 | 0.710626 |
| 0 | 0170 | 0.767530 | 0.839239 | 0.206114 |
| 0 | 0171 | 0.293547 | 0.745395 | 0.594274 |
| 0 | 0172 | 0.242416 | 0.236943 | 0.071603 |
| 0 | 0173 | 0.744905 | 0.246444 | 0.415424 |
| 0 | 0174 | 0.797193 | 0.742402 | 0.918553 |
| 0 | 0175 | 0.217963 | 0.840672 | 0.516957 |
| 0 | 0176 | 0.325306 | 0.336711 | 0.036905 |
| 0 | 0177 | 0.215526 | 0.643505 | 0.536299 |
| 0 | 0178 | 0.325521 | 0.140026 | 0.019187 |
| 0 | 0179 | 0.825555 | 0.147554 | 0.466818 |
| 0 | 0180 | 0.714824 | 0.646241 | 0.976251 |
| 0 | 0181 | 0.827739 | 0.339122 | 0.485487 |
| 0 | 0182 | 0.715252 | 0.840702 | 0.966688 |

|    |       |          |          |          |
|----|-------|----------|----------|----------|
| O  | O183  | 0.134330 | 0.744302 | 0.569590 |
| O  | O184  | 0.407221 | 0.235889 | 0.079185 |
| O  | O185  | 0.912133 | 0.245230 | 0.428459 |
| O  | O186  | 0.630580 | 0.742832 | 0.925648 |
| O  | O187  | 0.105107 | 0.823784 | 0.420664 |
| O  | O188  | 0.438447 | 0.323054 | 0.941507 |
| O  | O189  | 0.099265 | 0.645796 | 0.447435 |
| O  | O190  | 0.438686 | 0.158376 | 0.927188 |
| O  | O191  | 0.930070 | 0.166354 | 0.580832 |
| O  | O192  | 0.601069 | 0.657842 | 0.068930 |
| O  | O193  | 0.944264 | 0.331807 | 0.570327 |
| O  | O194  | 0.597660 | 0.841115 | 0.048462 |
| O  | O195  | 0.134866 | 0.842674 | 0.229708 |
| O  | O196  | 0.396214 | 0.342395 | 0.755749 |
| O  | O197  | 0.137525 | 0.662201 | 0.260129 |
| O  | O198  | 0.395642 | 0.156043 | 0.740115 |
| O  | O199  | 0.898407 | 0.134751 | 0.766831 |
| O  | O200  | 0.645677 | 0.641654 | 0.253826 |
| O  | O201  | 0.893517 | 0.330791 | 0.752895 |
| O  | O202  | 0.640557 | 0.818923 | 0.232566 |
| O  | O203  | 0.213289 | 0.745835 | 0.164129 |
| O  | O204  | 0.318237 | 0.252392 | 0.674007 |
| O  | O205  | 0.822140 | 0.234332 | 0.828817 |
| O  | O206  | 0.726341 | 0.737561 | 0.314607 |
| Al | Al207 | 0.332115 | 0.863549 | 0.327843 |
| Al | Al208 | 0.335731 | 0.629744 | 0.343025 |
| Si | Si209 | 0.716584 | 0.657795 | 0.303490 |
| Si | Si210 | 0.436993 | 0.044530 | 0.180557 |
| Si | Si211 | 0.094311 | 0.555109 | 0.695750 |
| Si | Si212 | 0.446988 | 0.429857 | 0.186659 |
| Si | Si213 | 0.085986 | 0.937746 | 0.661795 |
| Si | Si214 | 0.593127 | 0.935734 | 0.809952 |
| Si | Si215 | 0.941326 | 0.439075 | 0.321126 |
| Si | Si216 | 0.588377 | 0.546740 | 0.832374 |
| Si | Si217 | 0.946029 | 0.050867 | 0.331896 |
| Si | Si218 | 0.334483 | 0.022838 | 0.342237 |
| Si | Si219 | 0.194134 | 0.522866 | 0.857222 |
| Si | Si220 | 0.338529 | 0.466251 | 0.338184 |
| Si | Si221 | 0.198475 | 0.966768 | 0.812698 |
| Si | Si222 | 0.700852 | 0.963940 | 0.655571 |
| Si | Si223 | 0.840044 | 0.464676 | 0.157267 |
| Si | Si224 | 0.700428 | 0.519034 | 0.680301 |
| Si | Si225 | 0.834381 | 0.019940 | 0.179684 |
| Si | Si226 | 0.294279 | 0.058995 | 0.554629 |

|    |       |          |          |          |
|----|-------|----------|----------|----------|
| Si | Si227 | 0.235753 | 0.548163 | 0.074050 |
| Si | Si228 | 0.292225 | 0.440099 | 0.551828 |
| Si | Si229 | 0.238530 | 0.930161 | 0.028084 |
| Si | Si230 | 0.732231 | 0.929464 | 0.439083 |
| Si | Si231 | 0.797377 | 0.428204 | 0.945206 |
| Si | Si232 | 0.741430 | 0.556733 | 0.468624 |
| Si | Si233 | 0.789680 | 0.051098 | 0.967329 |
| Si | Si234 | 0.139513 | 0.058719 | 0.534055 |
| Si | Si235 | 0.391273 | 0.552005 | 0.057986 |
| Si | Si236 | 0.139049 | 0.434093 | 0.552165 |
| Si | Si237 | 0.392055 | 0.925413 | 0.036872 |
| Si | Si238 | 0.888193 | 0.927771 | 0.453128 |
| Si | Si239 | 0.642672 | 0.427466 | 0.964086 |
| Si | Si240 | 0.894895 | 0.558888 | 0.464304 |
| Si | Si241 | 0.635108 | 0.054061 | 0.961346 |
| Si | Si242 | 0.094208 | 0.023643 | 0.321686 |
| Si | Si243 | 0.439981 | 0.522839 | 0.845160 |
| Si | Si244 | 0.091855 | 0.463183 | 0.338767 |
| Si | Si245 | 0.444101 | 0.964588 | 0.828797 |
| Si | Si246 | 0.936490 | 0.963109 | 0.665176 |
| Si | Si247 | 0.596380 | 0.459123 | 0.176392 |
| Si | Si248 | 0.945890 | 0.523190 | 0.673445 |
| Si | Si249 | 0.587027 | 0.019590 | 0.173121 |
| Si | Si250 | 0.216247 | 0.045580 | 0.191663 |
| Si | Si251 | 0.315208 | 0.553029 | 0.716880 |
| Si | Si252 | 0.212363 | 0.423128 | 0.214848 |
| Si | Si253 | 0.324856 | 0.934265 | 0.688748 |
| Si | Si254 | 0.819497 | 0.936676 | 0.809203 |
| Si | Si255 | 0.720832 | 0.440231 | 0.307230 |
| Si | Si256 | 0.825272 | 0.552965 | 0.809595 |
| Si | Si257 | 0.704300 | 0.052434 | 0.306925 |
| Si | Si258 | 0.446494 | 0.816734 | 0.175943 |
| Si | Si259 | 0.092901 | 0.320634 | 0.697567 |
| Si | Si260 | 0.446982 | 0.664511 | 0.198966 |
| Si | Si261 | 0.093815 | 0.165080 | 0.687991 |
| Si | Si262 | 0.594035 | 0.163829 | 0.809282 |
| Si | Si263 | 0.946244 | 0.664045 | 0.319745 |
| Si | Si264 | 0.595144 | 0.321973 | 0.809884 |
| Si | Si265 | 0.943503 | 0.819598 | 0.310542 |
| Si | Si266 | 0.200353 | 0.363485 | 0.848470 |
| Si | Si267 | 0.205276 | 0.124941 | 0.836029 |
| Si | Si268 | 0.705891 | 0.122300 | 0.656164 |
| Si | Si269 | 0.839281 | 0.621193 | 0.166317 |
| Si | Si270 | 0.704724 | 0.359836 | 0.659064 |

|    |       |          |          |          |
|----|-------|----------|----------|----------|
| Si | Si271 | 0.837398 | 0.860781 | 0.157620 |
| Si | Si272 | 0.293295 | 0.818547 | 0.540629 |
| Si | Si273 | 0.248705 | 0.316404 | 0.056638 |
| Si | Si274 | 0.286674 | 0.666739 | 0.575460 |
| Si | Si275 | 0.249656 | 0.158484 | 0.047579 |
| Si | Si276 | 0.749275 | 0.169010 | 0.448594 |
| Si | Si277 | 0.791453 | 0.667026 | 0.960015 |
| Si | Si278 | 0.752728 | 0.323506 | 0.449417 |
| Si | Si279 | 0.791823 | 0.820934 | 0.944898 |
| Si | Si280 | 0.140518 | 0.820108 | 0.528157 |
| Si | Si281 | 0.401933 | 0.313895 | 0.047946 |
| Si | Si282 | 0.137471 | 0.665167 | 0.547752 |
| Si | Si283 | 0.402269 | 0.160857 | 0.034327 |
| Si | Si284 | 0.902750 | 0.169191 | 0.467583 |
| Si | Si285 | 0.637883 | 0.666320 | 0.962646 |
| Si | Si286 | 0.905053 | 0.321734 | 0.466675 |
| Si | Si287 | 0.638254 | 0.821691 | 0.949305 |
| Si | Si288 | 0.089211 | 0.866716 | 0.320576 |
| Si | Si289 | 0.448388 | 0.364939 | 0.839753 |
| Si | Si290 | 0.092097 | 0.619215 | 0.333970 |
| Si | Si291 | 0.446980 | 0.124210 | 0.818675 |
| Si | Si292 | 0.947657 | 0.119110 | 0.675121 |
| Si | Si293 | 0.592018 | 0.617215 | 0.172477 |
| Si | Si294 | 0.948061 | 0.363741 | 0.680945 |
| Si | Si295 | 0.592002 | 0.863474 | 0.163563 |
| Si | Si296 | 0.207402 | 0.825494 | 0.184098 |
| Si | Si297 | 0.324044 | 0.329086 | 0.709149 |
| Si | Si298 | 0.211622 | 0.673203 | 0.216542 |
| Si | Si299 | 0.321787 | 0.174505 | 0.704070 |
| Si | Si300 | 0.825392 | 0.155784 | 0.803684 |
| Si | Si301 | 0.821738 | 0.311607 | 0.795908 |
| Si | Si302 | 0.712553 | 0.814435 | 0.284494 |
| Zn | Zn303 | 0.432884 | 0.772927 | 0.403536 |

**TS-C<sub>6</sub>H<sub>7</sub>Zn-HTransfer-Concerted-Zn<sup>2+</sup> (Fig. 9a/TS2 in Green)**

Total energy = -1933.10025253 eV

data\_

|                        |                    |
|------------------------|--------------------|
| _audit_creation_method | 'Materials Studio' |
| _cell_length_a         | 20.357621          |
| _cell_length_b         | 20.050598          |
| _cell_length_c         | 13.476578          |
| _cell_angle_alpha      | 90.000000          |
| _cell_angle_beta       | 90.000000          |

```

_cell_angle_gamma      90.000000
_symmetry_space_group_name_H-M  'P1'
loop_
_atom_site_type_symbol
_atom_site_label
_atom_site_fract_x
_atom_site_fract_y
_atom_site_fract_z
  H      H1      0.438679      0.644756      0.521478
  H      H2      0.431858      0.693894      0.633405
  H      H3      0.394529      0.637838      0.499419
  H      H4      0.444633      0.798403      0.555738
  H      H5      0.539396      0.828156      0.444209
  H      H6      0.639571      0.763979      0.479923
  H      H7      0.634009      0.662804      0.585662
  H      H8      0.529414      0.620202      0.648739
  C      C9      0.468535      0.694682      0.574489
  C      C10     0.471180      0.758521      0.516956
  C      C11     0.536469      0.781007      0.483891
  C      C12     0.592043      0.745994      0.503834
  C      C13     0.588587      0.687176      0.564461
  C      C14     0.530637      0.663147      0.600096
  O      O15     0.511935      0.027799      0.208017
  O      O16     0.021296      0.535750      0.721618
  O      O17     0.523848      0.439371      0.209605
  O      O18     0.014795      0.942757      0.699576
  O      O19     0.523436      0.952466      0.785484
  O      O20     0.016720      0.453551      0.289418
  O      O21     0.514604      0.547151      0.803718
  O      O22     0.020791      0.041993      0.286925
  O      O23     0.392130      0.058763      0.267320
  O      O24     0.140890      0.562743      0.785272
  O      O25     0.402020      0.432753      0.274327
  O      O26     0.139922      0.940757      0.746760
  O      O27     0.642272      0.929120      0.719227
  O      O28     0.897700      0.430061      0.221671
  O      O29     0.635436      0.540160      0.740588
  O      O30     0.894652      0.050281      0.244398
  O      O31     0.441122      0.114075      0.104827
  O      O32     0.095596      0.624426      0.626544
  O      O33     0.439808      0.361821      0.117220
  O      O34     0.094653      0.867519      0.596120
  O      O35     0.600414      0.866201      0.878467
  O      O36     0.938253      0.371390      0.385837

```

|   |     |          |          |          |
|---|-----|----------|----------|----------|
| 0 | 037 | 0.604111 | 0.618533 | 0.893443 |
| 0 | 038 | 0.945611 | 0.121658 | 0.392160 |
| 0 | 039 | 0.407408 | 0.986289 | 0.105110 |
| 0 | 040 | 0.125747 | 0.495810 | 0.618290 |
| 0 | 041 | 0.429906 | 0.493249 | 0.101919 |
| 0 | 042 | 0.100263 | 0.998844 | 0.578595 |
| 0 | 043 | 0.628028 | 0.996363 | 0.886226 |
| 0 | 044 | 0.910834 | 0.501563 | 0.383764 |
| 0 | 045 | 0.602219 | 0.486633 | 0.915851 |
| 0 | 046 | 0.934820 | 0.990089 | 0.410717 |
| 0 | 047 | 0.331777 | 0.063369 | 0.438323 |
| 0 | 048 | 0.196897 | 0.545130 | 0.958110 |
| 0 | 049 | 0.339589 | 0.449178 | 0.444196 |
| 0 | 050 | 0.200884 | 0.947421 | 0.918180 |
| 0 | 051 | 0.704761 | 0.925259 | 0.551259 |
| 0 | 052 | 0.833388 | 0.426616 | 0.054605 |
| 0 | 053 | 0.701282 | 0.546921 | 0.573801 |
| 0 | 054 | 0.836232 | 0.040399 | 0.070465 |
| 0 | 055 | 0.345410 | 0.946190 | 0.347611 |
| 0 | 056 | 0.187918 | 0.443805 | 0.828151 |
| 0 | 057 | 0.336664 | 0.545122 | 0.307841 |
| 0 | 058 | 0.211445 | 0.047620 | 0.791420 |
| 0 | 059 | 0.693235 | 0.041051 | 0.646820 |
| 0 | 060 | 0.849135 | 0.542642 | 0.147009 |
| 0 | 061 | 0.713230 | 0.439443 | 0.687661 |
| 0 | 062 | 0.834448 | 0.938017 | 0.194287 |
| 0 | 063 | 0.263249 | 0.037633 | 0.277025 |
| 0 | 064 | 0.270436 | 0.542956 | 0.798092 |
| 0 | 065 | 0.272230 | 0.430243 | 0.280000 |
| 0 | 066 | 0.269422 | 0.932748 | 0.752394 |
| 0 | 067 | 0.772262 | 0.946818 | 0.715190 |
| 0 | 068 | 0.768185 | 0.452203 | 0.220158 |
| 0 | 069 | 0.764163 | 0.554493 | 0.745792 |
| 0 | 070 | 0.764867 | 0.047059 | 0.233196 |
| 0 | 071 | 0.305446 | 0.130606 | 0.600144 |
| 0 | 072 | 0.221673 | 0.619502 | 0.114400 |
| 0 | 073 | 0.314431 | 0.371208 | 0.596137 |
| 0 | 074 | 0.208586 | 0.863851 | 0.065194 |
| 0 | 075 | 0.729142 | 0.858257 | 0.388568 |
| 0 | 076 | 0.809617 | 0.357617 | 0.892736 |
| 0 | 077 | 0.722724 | 0.621645 | 0.418049 |
| 0 | 078 | 0.822143 | 0.117700 | 0.916748 |
| 0 | 079 | 0.220155 | 0.039779 | 0.535569 |
| 0 | 080 | 0.313776 | 0.538197 | 0.044040 |

|   |      |          |          |          |
|---|------|----------|----------|----------|
| 0 | 081  | 0.217060 | 0.437822 | 0.509393 |
| 0 | 082  | 0.317555 | 0.923242 | 0.996141 |
| 0 | 083  | 0.815024 | 0.949238 | 0.451382 |
| 0 | 084  | 0.721597 | 0.445659 | 0.957606 |
| 0 | 085  | 0.821941 | 0.555204 | 0.503765 |
| 0 | 086  | 0.717007 | 0.058384 | 0.996291 |
| 0 | 087  | 0.333273 | 0.001544 | 0.612897 |
| 0 | 088  | 0.208590 | 0.487356 | 0.130488 |
| 0 | 089  | 0.305477 | 0.501689 | 0.617021 |
| 0 | 090  | 0.231502 | 0.993617 | 0.096548 |
| 0 | 091  | 0.700450 | 0.988231 | 0.379796 |
| 0 | 092  | 0.833362 | 0.487742 | 0.880726 |
| 0 | 093  | 0.731968 | 0.490082 | 0.401620 |
| 0 | 094  | 0.803408 | 0.987398 | 0.896914 |
| 0 | 095  | 0.127555 | 0.128020 | 0.582536 |
| 0 | 096  | 0.402708 | 0.622957 | 0.114015 |
| 0 | 097  | 0.123959 | 0.364398 | 0.594347 |
| 0 | 098  | 0.413460 | 0.855686 | 0.082964 |
| 0 | 099  | 0.906492 | 0.860076 | 0.405395 |
| 0 | 0100 | 0.630083 | 0.356930 | 0.909468 |
| 0 | 0101 | 0.917189 | 0.630170 | 0.428895 |
| 0 | 0102 | 0.619886 | 0.127431 | 0.914286 |
| 0 | 0103 | 0.120553 | 0.063982 | 0.411441 |
| 0 | 0104 | 0.420582 | 0.564968 | 0.938810 |
| 0 | 0105 | 0.093899 | 0.443548 | 0.445150 |
| 0 | 0106 | 0.439376 | 0.933177 | 0.930489 |
| 0 | 0107 | 0.913262 | 0.923794 | 0.576847 |
| 0 | 0108 | 0.622423 | 0.419892 | 0.081750 |
| 0 | 0109 | 0.944645 | 0.540160 | 0.565071 |
| 0 | 0110 | 0.595104 | 0.045893 | 0.061861 |
| 0 | 0111 | 0.139867 | 0.038908 | 0.218858 |
| 0 | 0112 | 0.394497 | 0.546376 | 0.745481 |
| 0 | 0113 | 0.142104 | 0.420462 | 0.265243 |
| 0 | 0114 | 0.399666 | 0.928090 | 0.741379 |
| 0 | 0115 | 0.896183 | 0.950545 | 0.769385 |
| 0 | 0116 | 0.643901 | 0.446391 | 0.273083 |
| 0 | 0117 | 0.894657 | 0.560101 | 0.745563 |
| 0 | 0118 | 0.635518 | 0.061618 | 0.249343 |
| 0 | 0119 | 0.100928 | 0.942796 | 0.341183 |
| 0 | 0120 | 0.437267 | 0.445985 | 0.857730 |
| 0 | 0121 | 0.110361 | 0.543567 | 0.317593 |
| 0 | 0122 | 0.431626 | 0.043688 | 0.823905 |
| 0 | 0123 | 0.937770 | 0.044246 | 0.645846 |
| 0 | 0124 | 0.600257 | 0.540605 | 0.151624 |

|   |      |          |          |          |
|---|------|----------|----------|----------|
| 0 | 0125 | 0.932061 | 0.439850 | 0.690622 |
| 0 | 0126 | 0.610566 | 0.941792 | 0.180564 |
| 0 | 0127 | 0.223919 | 0.121851 | 0.137577 |
| 0 | 0128 | 0.311551 | 0.628617 | 0.661460 |
| 0 | 0129 | 0.217871 | 0.354454 | 0.142613 |
| 0 | 0130 | 0.328645 | 0.868400 | 0.606546 |
| 0 | 0131 | 0.817358 | 0.861440 | 0.849745 |
| 0 | 0132 | 0.728862 | 0.363333 | 0.353546 |
| 0 | 0133 | 0.827835 | 0.620848 | 0.884300 |
| 0 | 0134 | 0.713023 | 0.121189 | 0.376282 |
| 0 | 0135 | 0.516175 | 0.852487 | 0.208157 |
| 0 | 0136 | 0.024131 | 0.348498 | 0.721069 |
| 0 | 0137 | 0.514937 | 0.630977 | 0.216199 |
| 0 | 0138 | 0.025040 | 0.134475 | 0.706519 |
| 0 | 0139 | 0.524033 | 0.133310 | 0.779557 |
| 0 | 0140 | 0.012400 | 0.630570 | 0.293084 |
| 0 | 0141 | 0.524325 | 0.356200 | 0.793142 |
| 0 | 0142 | 0.010895 | 0.854559 | 0.286514 |
| 0 | 0143 | 0.399679 | 0.822451 | 0.274613 |
| 0 | 0144 | 0.145755 | 0.324168 | 0.779396 |
| 0 | 0145 | 0.402518 | 0.673350 | 0.298297 |
| 0 | 0146 | 0.143791 | 0.158532 | 0.774637 |
| 0 | 0147 | 0.646937 | 0.153123 | 0.725734 |
| 0 | 0148 | 0.890791 | 0.652533 | 0.239401 |
| 0 | 0149 | 0.640840 | 0.331562 | 0.715544 |
| 0 | 0150 | 0.893864 | 0.822532 | 0.216218 |
| 0 | 0151 | 0.457859 | 0.740352 | 0.149208 |
| 0 | 0152 | 0.088807 | 0.243921 | 0.649591 |
| 0 | 0153 | 0.586698 | 0.243218 | 0.837370 |
| 0 | 0154 | 0.952134 | 0.743596 | 0.347280 |
| 0 | 0155 | 0.323906 | 0.813070 | 0.427593 |
| 0 | 0156 | 0.206886 | 0.342060 | 0.948883 |
| 0 | 0157 | 0.334099 | 0.644399 | 0.468913 |
| 0 | 0158 | 0.205416 | 0.134507 | 0.944152 |
| 0 | 0159 | 0.717026 | 0.158393 | 0.565080 |
| 0 | 0160 | 0.830258 | 0.662593 | 0.071061 |
| 0 | 0161 | 0.704896 | 0.345424 | 0.546097 |
| 0 | 0162 | 0.835003 | 0.848805 | 0.044329 |
| 0 | 0163 | 0.259965 | 0.854503 | 0.244671 |
| 0 | 0164 | 0.274503 | 0.349353 | 0.781672 |
| 0 | 0165 | 0.259889 | 0.666642 | 0.290887 |
| 0 | 0166 | 0.275307 | 0.161867 | 0.786976 |
| 0 | 0167 | 0.775115 | 0.124955 | 0.734017 |
| 0 | 0168 | 0.763530 | 0.624140 | 0.230766 |



|    |       |          |          |          |
|----|-------|----------|----------|----------|
| O  | O169  | 0.772426 | 0.324238 | 0.709295 |
| O  | O170  | 0.762937 | 0.828420 | 0.201789 |
| O  | O171  | 0.289694 | 0.744022 | 0.584527 |
| O  | O172  | 0.241123 | 0.238401 | 0.057181 |
| O  | O173  | 0.743026 | 0.245084 | 0.426050 |
| O  | O174  | 0.798980 | 0.745333 | 0.928620 |
| O  | O175  | 0.212570 | 0.843496 | 0.522605 |
| O  | O176  | 0.324822 | 0.339067 | 0.031455 |
| O  | O177  | 0.210630 | 0.641544 | 0.534415 |
| O  | O178  | 0.326093 | 0.140511 | 0.018120 |
| O  | O179  | 0.827368 | 0.146391 | 0.461980 |
| O  | O180  | 0.716663 | 0.647427 | 0.979728 |
| O  | O181  | 0.826786 | 0.341616 | 0.480272 |
| O  | O182  | 0.714825 | 0.843521 | 0.968831 |
| O  | O183  | 0.129997 | 0.743655 | 0.564625 |
| O  | O184  | 0.407647 | 0.238724 | 0.069936 |
| O  | O185  | 0.911596 | 0.246776 | 0.428594 |
| O  | O186  | 0.631664 | 0.743570 | 0.931128 |
| O  | O187  | 0.106895 | 0.820878 | 0.410863 |
| O  | O188  | 0.434546 | 0.323929 | 0.927549 |
| O  | O189  | 0.099038 | 0.649239 | 0.434234 |
| O  | O190  | 0.437420 | 0.158751 | 0.920366 |
| O  | O191  | 0.931115 | 0.166511 | 0.578051 |
| O  | O192  | 0.605788 | 0.662564 | 0.081070 |
| O  | O193  | 0.941152 | 0.333529 | 0.572421 |
| O  | O194  | 0.603081 | 0.833472 | 0.067362 |
| O  | O195  | 0.131062 | 0.841592 | 0.219019 |
| O  | O196  | 0.400844 | 0.346735 | 0.739102 |
| O  | O197  | 0.133177 | 0.663520 | 0.243983 |
| O  | O198  | 0.400476 | 0.155413 | 0.731028 |
| O  | O199  | 0.902273 | 0.143265 | 0.766745 |
| O  | O200  | 0.637966 | 0.640510 | 0.270459 |
| O  | O201  | 0.899089 | 0.321550 | 0.758232 |
| O  | O202  | 0.638165 | 0.823490 | 0.256773 |
| O  | O203  | 0.211171 | 0.747150 | 0.151059 |
| O  | O204  | 0.323307 | 0.252119 | 0.666489 |
| O  | O205  | 0.816367 | 0.233473 | 0.832102 |
| O  | O206  | 0.723135 | 0.734799 | 0.324763 |
| Al | Al207 | 0.327094 | 0.864691 | 0.319309 |
| Al | Al208 | 0.329387 | 0.628368 | 0.335418 |
| Si | Si209 | 0.711888 | 0.655538 | 0.309921 |
| Si | Si210 | 0.438074 | 0.046692 | 0.171391 |
| Si | Si211 | 0.095389 | 0.554465 | 0.687304 |
| Si | Si212 | 0.447744 | 0.431921 | 0.176228 |

|    |       |          |          |          |
|----|-------|----------|----------|----------|
| Si | Si213 | 0.088525 | 0.937627 | 0.655356 |
| Si | Si214 | 0.598183 | 0.936373 | 0.818585 |
| Si | Si215 | 0.941426 | 0.439256 | 0.321236 |
| Si | Si216 | 0.590467 | 0.547881 | 0.839299 |
| Si | Si217 | 0.948191 | 0.050913 | 0.333433 |
| Si | Si218 | 0.333388 | 0.024415 | 0.332190 |
| Si | Si219 | 0.198922 | 0.523299 | 0.843203 |
| Si | Si220 | 0.337295 | 0.466053 | 0.325809 |
| Si | Si221 | 0.205351 | 0.967176 | 0.802508 |
| Si | Si222 | 0.703363 | 0.961086 | 0.658940 |
| Si | Si223 | 0.837003 | 0.463076 | 0.161605 |
| Si | Si224 | 0.703841 | 0.519698 | 0.687100 |
| Si | Si225 | 0.832538 | 0.018883 | 0.185941 |
| Si | Si226 | 0.297660 | 0.058791 | 0.546164 |
| Si | Si227 | 0.235436 | 0.548395 | 0.063351 |
| Si | Si228 | 0.294152 | 0.439747 | 0.541274 |
| Si | Si229 | 0.239456 | 0.931680 | 0.020606 |
| Si | Si230 | 0.737667 | 0.930217 | 0.442148 |
| Si | Si231 | 0.799484 | 0.429146 | 0.946090 |
| Si | Si232 | 0.744692 | 0.553310 | 0.473311 |
| Si | Si233 | 0.794578 | 0.050979 | 0.969594 |
| Si | Si234 | 0.142648 | 0.057873 | 0.526694 |
| Si | Si235 | 0.391323 | 0.554723 | 0.050415 |
| Si | Si236 | 0.140340 | 0.435199 | 0.541956 |
| Si | Si237 | 0.393919 | 0.925448 | 0.028662 |
| Si | Si238 | 0.892522 | 0.930509 | 0.460947 |
| Si | Si239 | 0.644312 | 0.426796 | 0.966505 |
| Si | Si240 | 0.898623 | 0.556567 | 0.470345 |
| Si | Si241 | 0.640225 | 0.056858 | 0.964442 |
| Si | Si242 | 0.095673 | 0.021831 | 0.315085 |
| Si | Si243 | 0.441320 | 0.525693 | 0.837820 |
| Si | Si244 | 0.091111 | 0.465223 | 0.328825 |
| Si | Si245 | 0.448126 | 0.964474 | 0.820023 |
| Si | Si246 | 0.940689 | 0.965212 | 0.672280 |
| Si | Si247 | 0.597261 | 0.461433 | 0.178537 |
| Si | Si248 | 0.948171 | 0.518862 | 0.681320 |
| Si | Si249 | 0.588031 | 0.019729 | 0.175386 |
| Si | Si250 | 0.215305 | 0.047336 | 0.182749 |
| Si | Si251 | 0.319871 | 0.553594 | 0.705883 |
| Si | Si252 | 0.210910 | 0.423600 | 0.204373 |
| Si | Si253 | 0.332025 | 0.933544 | 0.678034 |
| Si | Si254 | 0.822177 | 0.937020 | 0.807606 |
| Si | Si255 | 0.718592 | 0.438267 | 0.311720 |
| Si | Si256 | 0.829693 | 0.555309 | 0.814479 |

|    |       |          |          |          |
|----|-------|----------|----------|----------|
| Si | Si257 | 0.704070 | 0.054461 | 0.310080 |
| Si | Si258 | 0.446746 | 0.818515 | 0.176609 |
| Si | Si259 | 0.095552 | 0.320510 | 0.686103 |
| Si | Si260 | 0.444560 | 0.666224 | 0.193871 |
| Si | Si261 | 0.096346 | 0.165838 | 0.678270 |
| Si | Si262 | 0.594229 | 0.164393 | 0.814085 |
| Si | Si263 | 0.943654 | 0.664562 | 0.326922 |
| Si | Si264 | 0.595326 | 0.321814 | 0.813745 |
| Si | Si265 | 0.941148 | 0.820377 | 0.313760 |
| Si | Si266 | 0.204190 | 0.364801 | 0.834208 |
| Si | Si267 | 0.208460 | 0.125357 | 0.824638 |
| Si | Si268 | 0.708219 | 0.119127 | 0.668721 |
| Si | Si269 | 0.833615 | 0.620026 | 0.172803 |
| Si | Si270 | 0.707326 | 0.360146 | 0.664577 |
| Si | Si271 | 0.832308 | 0.859793 | 0.163660 |
| Si | Si272 | 0.288029 | 0.818183 | 0.535239 |
| Si | Si273 | 0.247904 | 0.318170 | 0.045538 |
| Si | Si274 | 0.284422 | 0.664934 | 0.562555 |
| Si | Si275 | 0.249198 | 0.159275 | 0.038642 |
| Si | Si276 | 0.750192 | 0.167447 | 0.456830 |
| Si | Si277 | 0.793322 | 0.668832 | 0.965116 |
| Si | Si278 | 0.750845 | 0.323396 | 0.452462 |
| Si | Si279 | 0.791699 | 0.824445 | 0.949155 |
| Si | Si280 | 0.135754 | 0.819332 | 0.522894 |
| Si | Si281 | 0.401580 | 0.316296 | 0.036847 |
| Si | Si282 | 0.133250 | 0.664817 | 0.539381 |
| Si | Si283 | 0.402751 | 0.162820 | 0.028614 |
| Si | Si284 | 0.904006 | 0.169944 | 0.464899 |
| Si | Si285 | 0.639447 | 0.667776 | 0.971774 |
| Si | Si286 | 0.904347 | 0.323225 | 0.466974 |
| Si | Si287 | 0.637958 | 0.821741 | 0.961076 |
| Si | Si288 | 0.088086 | 0.865017 | 0.313242 |
| Si | Si289 | 0.449086 | 0.368121 | 0.829247 |
| Si | Si290 | 0.089391 | 0.621778 | 0.321798 |
| Si | Si291 | 0.448228 | 0.122671 | 0.813903 |
| Si | Si292 | 0.949219 | 0.121907 | 0.674792 |
| Si | Si293 | 0.590083 | 0.618540 | 0.179752 |
| Si | Si294 | 0.949077 | 0.360868 | 0.685093 |
| Si | Si295 | 0.592443 | 0.863135 | 0.177581 |
| Si | Si296 | 0.203878 | 0.826519 | 0.172589 |
| Si | Si297 | 0.328028 | 0.329821 | 0.696802 |
| Si | Si298 | 0.207799 | 0.673890 | 0.201711 |
| Si | Si299 | 0.326438 | 0.174182 | 0.695942 |
| Si | Si300 | 0.829120 | 0.155188 | 0.811060 |

|    |       |          |          |          |
|----|-------|----------|----------|----------|
| Si | Si301 | 0.824740 | 0.310241 | 0.798132 |
| Si | Si302 | 0.713485 | 0.811936 | 0.292922 |
| Zn | Zn303 | 0.414243 | 0.759531 | 0.392719 |

**C<sub>6</sub>H<sub>6</sub>-Phys.Ads-H<sub>2</sub>-Phys.Ads-Zn<sup>2+</sup> (Fig. 9a/M3 in Green)**

Total energy = -1935.71411533 eV

data\_

\_audit\_creation\_method 'Materials Studio'

\_cell\_length\_a 20.357621

\_cell\_length\_b 20.050598

\_cell\_length\_c 13.476578

\_cell\_angle\_alpha 90.000000

\_cell\_angle\_beta 90.000000

\_cell\_angle\_gamma 90.000000

\_symmetry\_space\_group\_name\_H-M 'P1'

loop\_

\_atom\_site\_type\_symbol

\_atom\_site\_label

\_atom\_site\_fract\_x

\_atom\_site\_fract\_y

\_atom\_site\_fract\_z

|   |     |          |          |          |
|---|-----|----------|----------|----------|
| H | H1  | 0.497447 | 0.478756 | 0.560109 |
| H | H2  | 0.460106 | 0.747755 | 0.708163 |
| H | H3  | 0.469979 | 0.492693 | 0.530806 |
| H | H4  | 0.467889 | 0.835558 | 0.578340 |
| H | H5  | 0.522753 | 0.809901 | 0.417052 |
| H | H6  | 0.562874 | 0.694638 | 0.382472 |
| H | H7  | 0.555350 | 0.607652 | 0.513430 |
| H | H8  | 0.503306 | 0.634437 | 0.674642 |
| C | C9  | 0.481976 | 0.736290 | 0.636707 |
| C | C10 | 0.485584 | 0.785474 | 0.563609 |
| C | C11 | 0.513731 | 0.770167 | 0.470260 |
| C | C12 | 0.539613 | 0.705771 | 0.452875 |
| C | C13 | 0.535643 | 0.657148 | 0.526603 |
| C | C14 | 0.506753 | 0.672492 | 0.617965 |
| O | O15 | 0.517083 | 0.030993 | 0.214074 |
| O | O16 | 0.016236 | 0.554592 | 0.709576 |
| O | O17 | 0.522791 | 0.443964 | 0.218177 |
| O | O18 | 0.012753 | 0.933150 | 0.698201 |
| O | O19 | 0.517029 | 0.934114 | 0.791371 |
| O | O20 | 0.018639 | 0.454427 | 0.290971 |
| O | O21 | 0.514088 | 0.550155 | 0.798937 |
| O | O22 | 0.022226 | 0.040155 | 0.286846 |

|   |     |          |          |          |
|---|-----|----------|----------|----------|
| 0 | 023 | 0.398268 | 0.062025 | 0.281131 |
| 0 | 024 | 0.131274 | 0.538197 | 0.789886 |
| 0 | 025 | 0.400222 | 0.424714 | 0.281276 |
| 0 | 026 | 0.130309 | 0.954440 | 0.774030 |
| 0 | 027 | 0.631850 | 0.947745 | 0.707361 |
| 0 | 028 | 0.900430 | 0.428880 | 0.217753 |
| 0 | 029 | 0.630415 | 0.528950 | 0.724058 |
| 0 | 030 | 0.897579 | 0.056130 | 0.233163 |
| 0 | 031 | 0.443052 | 0.115632 | 0.114019 |
| 0 | 032 | 0.118360 | 0.623751 | 0.641361 |
| 0 | 033 | 0.444775 | 0.363899 | 0.119006 |
| 0 | 034 | 0.114251 | 0.865645 | 0.629740 |
| 0 | 035 | 0.617815 | 0.862029 | 0.854451 |
| 0 | 036 | 0.939861 | 0.371092 | 0.384651 |
| 0 | 037 | 0.614164 | 0.621366 | 0.863551 |
| 0 | 038 | 0.945287 | 0.119880 | 0.389701 |
| 0 | 039 | 0.409826 | 0.987753 | 0.120200 |
| 0 | 040 | 0.110295 | 0.494098 | 0.606589 |
| 0 | 041 | 0.423894 | 0.494011 | 0.116336 |
| 0 | 042 | 0.102395 | 0.994817 | 0.590145 |
| 0 | 043 | 0.615715 | 0.992011 | 0.891002 |
| 0 | 044 | 0.909930 | 0.500423 | 0.379522 |
| 0 | 045 | 0.605025 | 0.493030 | 0.911120 |
| 0 | 046 | 0.929023 | 0.988654 | 0.397804 |
| 0 | 047 | 0.334669 | 0.061708 | 0.450997 |
| 0 | 048 | 0.202459 | 0.546512 | 0.948922 |
| 0 | 049 | 0.336407 | 0.427537 | 0.451975 |
| 0 | 050 | 0.200104 | 0.940228 | 0.936040 |
| 0 | 051 | 0.703823 | 0.925480 | 0.551637 |
| 0 | 052 | 0.835484 | 0.428815 | 0.049816 |
| 0 | 053 | 0.697160 | 0.551560 | 0.562662 |
| 0 | 054 | 0.833483 | 0.054414 | 0.062044 |
| 0 | 055 | 0.356827 | 0.946865 | 0.357568 |
| 0 | 056 | 0.215718 | 0.440803 | 0.828296 |
| 0 | 057 | 0.356276 | 0.540225 | 0.351930 |
| 0 | 058 | 0.219067 | 0.046850 | 0.821224 |
| 0 | 059 | 0.709587 | 0.043875 | 0.639887 |
| 0 | 060 | 0.857597 | 0.543566 | 0.141310 |
| 0 | 061 | 0.720392 | 0.440457 | 0.666772 |
| 0 | 062 | 0.855778 | 0.941774 | 0.159438 |
| 0 | 063 | 0.270115 | 0.034093 | 0.286730 |
| 0 | 064 | 0.259845 | 0.557586 | 0.772697 |
| 0 | 065 | 0.271329 | 0.449167 | 0.286864 |
| 0 | 066 | 0.258241 | 0.929890 | 0.759186 |

|   |      |          |          |          |
|---|------|----------|----------|----------|
| 0 | 067  | 0.762311 | 0.939310 | 0.725622 |
| 0 | 068  | 0.771897 | 0.458754 | 0.216035 |
| 0 | 069  | 0.757549 | 0.556595 | 0.738620 |
| 0 | 070  | 0.769293 | 0.028817 | 0.227954 |
| 0 | 071  | 0.301421 | 0.131566 | 0.608416 |
| 0 | 072  | 0.217745 | 0.621530 | 0.106394 |
| 0 | 073  | 0.302397 | 0.361351 | 0.612649 |
| 0 | 074  | 0.215530 | 0.863319 | 0.091333 |
| 0 | 075  | 0.717370 | 0.861882 | 0.384479 |
| 0 | 076  | 0.802980 | 0.355576 | 0.894286 |
| 0 | 077  | 0.717183 | 0.626348 | 0.405472 |
| 0 | 078  | 0.806003 | 0.121215 | 0.899291 |
| 0 | 079  | 0.217956 | 0.042072 | 0.535322 |
| 0 | 080  | 0.316766 | 0.546666 | 0.039563 |
| 0 | 081  | 0.214983 | 0.438541 | 0.523173 |
| 0 | 082  | 0.318435 | 0.927585 | 0.012404 |
| 0 | 083  | 0.812827 | 0.943473 | 0.447037 |
| 0 | 084  | 0.717991 | 0.442967 | 0.969641 |
| 0 | 085  | 0.815995 | 0.555491 | 0.487257 |
| 0 | 086  | 0.712733 | 0.051352 | 0.988738 |
| 0 | 087  | 0.325884 | 0.002950 | 0.627489 |
| 0 | 088  | 0.213140 | 0.488689 | 0.121857 |
| 0 | 089  | 0.314105 | 0.493094 | 0.619566 |
| 0 | 090  | 0.227559 | 0.995549 | 0.109103 |
| 0 | 091  | 0.700301 | 0.994216 | 0.384981 |
| 0 | 092  | 0.823455 | 0.484230 | 0.871516 |
| 0 | 093  | 0.719852 | 0.494992 | 0.388794 |
| 0 | 094  | 0.808062 | 0.988690 | 0.895389 |
| 0 | 095  | 0.126398 | 0.125372 | 0.601124 |
| 0 | 096  | 0.409029 | 0.625086 | 0.115515 |
| 0 | 097  | 0.124063 | 0.362173 | 0.607288 |
| 0 | 098  | 0.409546 | 0.856166 | 0.104343 |
| 0 | 099  | 0.906444 | 0.857701 | 0.399215 |
| 0 | 0100 | 0.627231 | 0.361790 | 0.897075 |
| 0 | 0101 | 0.907238 | 0.631888 | 0.407001 |
| 0 | 0102 | 0.621796 | 0.124520 | 0.898387 |
| 0 | 0103 | 0.110819 | 0.066724 | 0.427207 |
| 0 | 0104 | 0.430930 | 0.562333 | 0.948246 |
| 0 | 0105 | 0.097114 | 0.426504 | 0.441278 |
| 0 | 0106 | 0.441627 | 0.928453 | 0.949843 |
| 0 | 0107 | 0.914778 | 0.923361 | 0.567511 |
| 0 | 0108 | 0.607794 | 0.418568 | 0.071375 |
| 0 | 0109 | 0.938416 | 0.553295 | 0.554677 |
| 0 | 0110 | 0.592128 | 0.054725 | 0.059113 |

|   |      |          |          |          |
|---|------|----------|----------|----------|
| 0 | 0111 | 0.145307 | 0.050110 | 0.237758 |
| 0 | 0112 | 0.388581 | 0.536426 | 0.765316 |
| 0 | 0113 | 0.143804 | 0.424948 | 0.257676 |
| 0 | 0114 | 0.388547 | 0.940396 | 0.770877 |
| 0 | 0115 | 0.891093 | 0.951719 | 0.756069 |
| 0 | 0116 | 0.647649 | 0.430579 | 0.258059 |
| 0 | 0117 | 0.888041 | 0.552789 | 0.735734 |
| 0 | 0118 | 0.642862 | 0.062838 | 0.241021 |
| 0 | 0119 | 0.108266 | 0.946882 | 0.346769 |
| 0 | 0120 | 0.451795 | 0.443988 | 0.869675 |
| 0 | 0121 | 0.113600 | 0.539808 | 0.340931 |
| 0 | 0122 | 0.453575 | 0.041618 | 0.853993 |
| 0 | 0123 | 0.947777 | 0.041028 | 0.638637 |
| 0 | 0124 | 0.608733 | 0.536673 | 0.157711 |
| 0 | 0125 | 0.947610 | 0.445587 | 0.663740 |
| 0 | 0126 | 0.613410 | 0.945513 | 0.167754 |
| 0 | 0127 | 0.234374 | 0.123942 | 0.152422 |
| 0 | 0128 | 0.333894 | 0.622398 | 0.645471 |
| 0 | 0129 | 0.231424 | 0.359094 | 0.156343 |
| 0 | 0130 | 0.334899 | 0.871048 | 0.629005 |
| 0 | 0131 | 0.822004 | 0.861355 | 0.852262 |
| 0 | 0132 | 0.741836 | 0.367583 | 0.350360 |
| 0 | 0133 | 0.827317 | 0.616457 | 0.877073 |
| 0 | 0134 | 0.728952 | 0.122820 | 0.353060 |
| 0 | 0135 | 0.523069 | 0.854148 | 0.205339 |
| 0 | 0136 | 0.021624 | 0.345852 | 0.729372 |
| 0 | 0137 | 0.524332 | 0.630614 | 0.212474 |
| 0 | 0138 | 0.021963 | 0.136585 | 0.719561 |
| 0 | 0139 | 0.520243 | 0.143076 | 0.775816 |
| 0 | 0140 | 0.020885 | 0.629355 | 0.308690 |
| 0 | 0141 | 0.521205 | 0.347005 | 0.783003 |
| 0 | 0142 | 0.019419 | 0.856644 | 0.299503 |
| 0 | 0143 | 0.411660 | 0.818902 | 0.292687 |
| 0 | 0144 | 0.141099 | 0.333410 | 0.798661 |
| 0 | 0145 | 0.413472 | 0.669144 | 0.299799 |
| 0 | 0146 | 0.139251 | 0.150035 | 0.795425 |
| 0 | 0147 | 0.639848 | 0.146969 | 0.705432 |
| 0 | 0148 | 0.910036 | 0.654567 | 0.214665 |
| 0 | 0149 | 0.637835 | 0.340191 | 0.702417 |
| 0 | 0150 | 0.907689 | 0.825864 | 0.208516 |
| 0 | 0151 | 0.465198 | 0.741448 | 0.154166 |
| 0 | 0152 | 0.094817 | 0.242751 | 0.672231 |
| 0 | 0153 | 0.599568 | 0.243733 | 0.825415 |
| 0 | 0154 | 0.958513 | 0.743626 | 0.341756 |

|   |      |          |          |          |
|---|------|----------|----------|----------|
| 0 | 0155 | 0.340847 | 0.816432 | 0.450368 |
| 0 | 0156 | 0.207837 | 0.345048 | 0.964574 |
| 0 | 0157 | 0.346717 | 0.668395 | 0.461352 |
| 0 | 0158 | 0.207012 | 0.140644 | 0.960907 |
| 0 | 0159 | 0.708687 | 0.156904 | 0.541607 |
| 0 | 0160 | 0.833519 | 0.662042 | 0.061586 |
| 0 | 0161 | 0.707526 | 0.340565 | 0.537848 |
| 0 | 0162 | 0.841385 | 0.835626 | 0.042333 |
| 0 | 0163 | 0.271801 | 0.848510 | 0.267825 |
| 0 | 0164 | 0.271700 | 0.324713 | 0.796846 |
| 0 | 0165 | 0.272425 | 0.647194 | 0.281953 |
| 0 | 0166 | 0.269332 | 0.166160 | 0.793053 |
| 0 | 0167 | 0.770457 | 0.149007 | 0.713836 |
| 0 | 0168 | 0.781385 | 0.629220 | 0.235510 |
| 0 | 0169 | 0.767226 | 0.321403 | 0.710520 |
| 0 | 0170 | 0.777164 | 0.843403 | 0.211744 |
| 0 | 0171 | 0.301185 | 0.745946 | 0.604596 |
| 0 | 0172 | 0.247158 | 0.241891 | 0.073462 |
| 0 | 0173 | 0.749549 | 0.245934 | 0.412280 |
| 0 | 0174 | 0.800091 | 0.741601 | 0.915666 |
| 0 | 0175 | 0.224231 | 0.842933 | 0.529771 |
| 0 | 0176 | 0.330194 | 0.340406 | 0.031052 |
| 0 | 0177 | 0.226922 | 0.645657 | 0.535461 |
| 0 | 0178 | 0.329963 | 0.143977 | 0.022748 |
| 0 | 0179 | 0.829988 | 0.148644 | 0.470338 |
| 0 | 0180 | 0.718193 | 0.645947 | 0.976563 |
| 0 | 0181 | 0.831697 | 0.338293 | 0.485207 |
| 0 | 0182 | 0.719738 | 0.838575 | 0.973774 |
| 0 | 0183 | 0.142860 | 0.743863 | 0.576241 |
| 0 | 0184 | 0.411913 | 0.240539 | 0.079044 |
| 0 | 0185 | 0.916691 | 0.245357 | 0.426811 |
| 0 | 0186 | 0.633950 | 0.742657 | 0.926858 |
| 0 | 0187 | 0.108548 | 0.831223 | 0.438625 |
| 0 | 0188 | 0.439903 | 0.320960 | 0.930941 |
| 0 | 0189 | 0.109490 | 0.649397 | 0.448739 |
| 0 | 0190 | 0.441901 | 0.161875 | 0.928705 |
| 0 | 0191 | 0.937496 | 0.164567 | 0.576721 |
| 0 | 0192 | 0.599899 | 0.649263 | 0.056174 |
| 0 | 0193 | 0.946808 | 0.329485 | 0.572045 |
| 0 | 0194 | 0.598979 | 0.841902 | 0.046778 |
| 0 | 0195 | 0.142264 | 0.836423 | 0.247956 |
| 0 | 0196 | 0.394456 | 0.357129 | 0.751027 |
| 0 | 0197 | 0.142960 | 0.656825 | 0.258255 |
| 0 | 0198 | 0.392452 | 0.133014 | 0.748842 |



|    |       |          |          |          |
|----|-------|----------|----------|----------|
| O  | O199  | 0.895804 | 0.131228 | 0.758583 |
| O  | O200  | 0.651647 | 0.649209 | 0.238164 |
| O  | O201  | 0.893068 | 0.343228 | 0.752618 |
| O  | O202  | 0.648525 | 0.824168 | 0.227079 |
| O  | O203  | 0.220311 | 0.744380 | 0.170932 |
| O  | O204  | 0.342063 | 0.245716 | 0.682179 |
| O  | O205  | 0.832492 | 0.237833 | 0.824769 |
| O  | O206  | 0.730831 | 0.740576 | 0.312785 |
| Al | Al207 | 0.340650 | 0.864009 | 0.337183 |
| Al | Al208 | 0.342160 | 0.624375 | 0.344970 |
| Si | Si209 | 0.720493 | 0.661325 | 0.296624 |
| Si | Si210 | 0.441934 | 0.049178 | 0.182611 |
| Si | Si211 | 0.094300 | 0.552756 | 0.685912 |
| Si | Si212 | 0.446999 | 0.431632 | 0.184664 |
| Si | Si213 | 0.090557 | 0.937089 | 0.672871 |
| Si | Si214 | 0.595534 | 0.934361 | 0.812218 |
| Si | Si215 | 0.942871 | 0.438612 | 0.318970 |
| Si | Si216 | 0.591812 | 0.548096 | 0.825355 |
| Si | Si217 | 0.947975 | 0.051092 | 0.326534 |
| Si | Si218 | 0.340175 | 0.024388 | 0.343820 |
| Si | Si219 | 0.202507 | 0.520527 | 0.836098 |
| Si | Si220 | 0.341225 | 0.462069 | 0.342499 |
| Si | Si221 | 0.201745 | 0.967729 | 0.823584 |
| Si | Si222 | 0.702102 | 0.964379 | 0.656756 |
| Si | Si223 | 0.841319 | 0.464882 | 0.157106 |
| Si | Si224 | 0.701878 | 0.519178 | 0.672772 |
| Si | Si225 | 0.838989 | 0.020477 | 0.171075 |
| Si | Si226 | 0.294973 | 0.059465 | 0.554650 |
| Si | Si227 | 0.237658 | 0.551551 | 0.056200 |
| Si | Si228 | 0.292202 | 0.430132 | 0.551568 |
| Si | Si229 | 0.240235 | 0.931197 | 0.039180 |
| Si | Si230 | 0.734162 | 0.931172 | 0.441049 |
| Si | Si231 | 0.794989 | 0.427879 | 0.946369 |
| Si | Si232 | 0.738323 | 0.557199 | 0.459892 |
| Si | Si233 | 0.790399 | 0.053976 | 0.960894 |
| Si | Si234 | 0.139717 | 0.057527 | 0.538564 |
| Si | Si235 | 0.394617 | 0.556497 | 0.055231 |
| Si | Si236 | 0.137107 | 0.430096 | 0.545206 |
| Si | Si237 | 0.394444 | 0.925731 | 0.046843 |
| Si | Si238 | 0.890976 | 0.928353 | 0.453037 |
| Si | Si239 | 0.639703 | 0.428519 | 0.962100 |
| Si | Si240 | 0.893066 | 0.559883 | 0.457071 |
| Si | Si241 | 0.635741 | 0.055925 | 0.958485 |
| Si | Si242 | 0.096593 | 0.025674 | 0.324889 |

|    |       |          |          |          |
|----|-------|----------|----------|----------|
| Si | Si243 | 0.445456 | 0.522875 | 0.845436 |
| Si | Si244 | 0.093267 | 0.461642 | 0.332447 |
| Si | Si245 | 0.449356 | 0.961585 | 0.840496 |
| Si | Si246 | 0.941777 | 0.962209 | 0.665171 |
| Si | Si247 | 0.596074 | 0.457425 | 0.176151 |
| Si | Si248 | 0.947389 | 0.526118 | 0.667166 |
| Si | Si249 | 0.591005 | 0.023683 | 0.170739 |
| Si | Si250 | 0.220064 | 0.050169 | 0.196929 |
| Si | Si251 | 0.323474 | 0.551339 | 0.700976 |
| Si | Si252 | 0.215581 | 0.431011 | 0.206088 |
| Si | Si253 | 0.326197 | 0.937253 | 0.697008 |
| Si | Si254 | 0.820985 | 0.935973 | 0.806561 |
| Si | Si255 | 0.720830 | 0.438345 | 0.303080 |
| Si | Si256 | 0.823952 | 0.551876 | 0.805668 |
| Si | Si257 | 0.710841 | 0.052233 | 0.301804 |
| Si | Si258 | 0.452270 | 0.818112 | 0.188219 |
| Si | Si259 | 0.095466 | 0.320974 | 0.701688 |
| Si | Si260 | 0.453265 | 0.666070 | 0.194474 |
| Si | Si261 | 0.095644 | 0.163762 | 0.696713 |
| Si | Si262 | 0.595227 | 0.164748 | 0.801468 |
| Si | Si263 | 0.950024 | 0.665176 | 0.317756 |
| Si | Si264 | 0.596219 | 0.322785 | 0.802111 |
| Si | Si265 | 0.948624 | 0.821107 | 0.312017 |
| Si | Si266 | 0.208653 | 0.361204 | 0.846894 |
| Si | Si267 | 0.208375 | 0.125787 | 0.842699 |
| Si | Si268 | 0.707060 | 0.124151 | 0.651293 |
| Si | Si269 | 0.845569 | 0.622035 | 0.164013 |
| Si | Si270 | 0.708070 | 0.360659 | 0.654607 |
| Si | Si271 | 0.845460 | 0.861736 | 0.155796 |
| Si | Si272 | 0.299186 | 0.819668 | 0.554013 |
| Si | Si273 | 0.254046 | 0.321237 | 0.056325 |
| Si | Si274 | 0.301487 | 0.669974 | 0.561808 |
| Si | Si275 | 0.254450 | 0.163001 | 0.052231 |
| Si | Si276 | 0.754280 | 0.168274 | 0.444267 |
| Si | Si277 | 0.794798 | 0.666146 | 0.957097 |
| Si | Si278 | 0.757288 | 0.322793 | 0.446988 |
| Si | Si279 | 0.795867 | 0.819487 | 0.946710 |
| Si | Si280 | 0.147039 | 0.821258 | 0.542708 |
| Si | Si281 | 0.406573 | 0.316986 | 0.040522 |
| Si | Si282 | 0.149252 | 0.665383 | 0.549685 |
| Si | Si283 | 0.406696 | 0.164950 | 0.036752 |
| Si | Si284 | 0.907465 | 0.169143 | 0.465296 |
| Si | Si285 | 0.641618 | 0.664817 | 0.956043 |
| Si | Si286 | 0.909153 | 0.321412 | 0.466749 |

|    |       |          |          |          |
|----|-------|----------|----------|----------|
| Si | Si287 | 0.642897 | 0.821284 | 0.950919 |
| Si | Si288 | 0.095441 | 0.867591 | 0.332348 |
| Si | Si289 | 0.451430 | 0.366775 | 0.833317 |
| Si | Si290 | 0.097481 | 0.619153 | 0.338404 |
| Si | Si291 | 0.451466 | 0.120222 | 0.826540 |
| Si | Si292 | 0.950635 | 0.118394 | 0.673687 |
| Si | Si293 | 0.596708 | 0.616152 | 0.166040 |
| Si | Si294 | 0.951850 | 0.365880 | 0.679538 |
| Si | Si295 | 0.596349 | 0.866687 | 0.161464 |
| Si | Si296 | 0.213926 | 0.823127 | 0.196840 |
| Si | Si297 | 0.327492 | 0.322598 | 0.710699 |
| Si | Si298 | 0.214973 | 0.667296 | 0.206537 |
| Si | Si299 | 0.326207 | 0.168702 | 0.708327 |
| Si | Si300 | 0.826174 | 0.159641 | 0.798383 |
| Si | Si301 | 0.824110 | 0.315219 | 0.794936 |
| Si | Si302 | 0.718836 | 0.817990 | 0.283632 |
| Zn | Zn303 | 0.410615 | 0.744892 | 0.406742 |

**C<sub>6</sub>H<sub>12</sub>-Phys.Ads-ZnOH<sup>+</sup> (Fig. 9b/M1 in Black)**

Total energy = -1962.47011774 eV

data\_

\_audit\_creation\_method 'Materials Studio'

\_cell\_length\_a 20.357621

\_cell\_length\_b 20.050598

\_cell\_length\_c 13.476578

\_cell\_angle\_alpha 90.000000

\_cell\_angle\_beta 90.000000

\_cell\_angle\_gamma 90.000000

\_symmetry\_space\_group\_name\_H-M 'P1'

loop\_

\_atom\_site\_type\_symbol

\_atom\_site\_label

\_atom\_site\_fract\_x

\_atom\_site\_fract\_y

\_atom\_site\_fract\_z

|   |    |          |          |          |
|---|----|----------|----------|----------|
| H | H1 | 0.751618 | 0.752598 | 0.652184 |
| H | H2 | 0.545935 | 0.640035 | 0.464854 |
| H | H3 | 0.471852 | 0.684029 | 0.480174 |
| H | H4 | 0.606987 | 0.746596 | 0.446133 |
| H | H5 | 0.543669 | 0.742277 | 0.358275 |
| H | H6 | 0.473943 | 0.815702 | 0.464161 |
| H | H7 | 0.549591 | 0.854985 | 0.439654 |
| H | H8 | 0.517629 | 0.865055 | 0.618774 |

|   |     |          |          |          |
|---|-----|----------|----------|----------|
| H | H9  | 0.592291 | 0.821791 | 0.604301 |
| H | H10 | 0.457110 | 0.759039 | 0.641644 |
| H | H11 | 0.522849 | 0.762720 | 0.726650 |
| H | H12 | 0.514311 | 0.650148 | 0.644861 |
| H | H13 | 0.590240 | 0.688995 | 0.620891 |
| C | C14 | 0.524943 | 0.686540 | 0.494048 |
| C | C15 | 0.553067 | 0.746642 | 0.438031 |
| C | C16 | 0.526890 | 0.812832 | 0.478875 |
| C | C17 | 0.539132 | 0.818621 | 0.590846 |
| C | C18 | 0.511027 | 0.758585 | 0.647453 |
| C | C19 | 0.537087 | 0.692276 | 0.606131 |
| O | O20 | 0.520099 | 0.035931 | 0.217609 |
| O | O21 | 0.017426 | 0.546606 | 0.716105 |
| O | O22 | 0.525015 | 0.440158 | 0.216200 |
| O | O23 | 0.013042 | 0.935832 | 0.706824 |
| O | O24 | 0.515077 | 0.947946 | 0.789444 |
| O | O25 | 0.020908 | 0.455715 | 0.293543 |
| O | O26 | 0.514176 | 0.540892 | 0.793885 |
| O | O27 | 0.019864 | 0.036698 | 0.295135 |
| O | O28 | 0.401835 | 0.059163 | 0.290324 |
| O | O29 | 0.133683 | 0.554682 | 0.795720 |
| O | O30 | 0.405187 | 0.433158 | 0.290648 |
| O | O31 | 0.129668 | 0.938435 | 0.789378 |
| O | O32 | 0.629570 | 0.953401 | 0.705620 |
| O | O33 | 0.903692 | 0.436641 | 0.215933 |
| O | O34 | 0.632617 | 0.532307 | 0.725659 |
| O | O35 | 0.903581 | 0.049137 | 0.214494 |
| O | O36 | 0.440323 | 0.120921 | 0.126138 |
| O | O37 | 0.107232 | 0.625085 | 0.634568 |
| O | O38 | 0.437834 | 0.362194 | 0.131156 |
| O | O39 | 0.109484 | 0.865187 | 0.628394 |
| O | O40 | 0.609083 | 0.865167 | 0.849192 |
| O | O41 | 0.939149 | 0.371708 | 0.378788 |
| O | O42 | 0.605607 | 0.619552 | 0.868456 |
| O | O43 | 0.934447 | 0.120319 | 0.374985 |
| O | O44 | 0.414856 | 0.991332 | 0.123468 |
| O | O45 | 0.120145 | 0.493822 | 0.621910 |
| O | O46 | 0.425923 | 0.493583 | 0.117703 |
| O | O47 | 0.111006 | 0.996859 | 0.614159 |
| O | O48 | 0.617237 | 0.993675 | 0.892529 |
| O | O49 | 0.913651 | 0.501991 | 0.385374 |
| O | O50 | 0.605987 | 0.489151 | 0.908761 |
| O | O51 | 0.914950 | 0.989671 | 0.389703 |
| O | O52 | 0.339558 | 0.038571 | 0.459054 |

|   |     |          |          |          |
|---|-----|----------|----------|----------|
| 0 | 053 | 0.197023 | 0.539124 | 0.962429 |
| 0 | 054 | 0.340547 | 0.452649 | 0.458369 |
| 0 | 055 | 0.196073 | 0.951104 | 0.955275 |
| 0 | 056 | 0.692997 | 0.940165 | 0.538012 |
| 0 | 057 | 0.838541 | 0.426381 | 0.048130 |
| 0 | 058 | 0.704106 | 0.541755 | 0.566134 |
| 0 | 059 | 0.839802 | 0.041947 | 0.043405 |
| 0 | 060 | 0.336576 | 0.946725 | 0.314845 |
| 0 | 061 | 0.206784 | 0.446789 | 0.819138 |
| 0 | 062 | 0.334983 | 0.543270 | 0.312516 |
| 0 | 063 | 0.207467 | 0.043225 | 0.812181 |
| 0 | 064 | 0.712782 | 0.047812 | 0.649478 |
| 0 | 065 | 0.853252 | 0.545161 | 0.129450 |
| 0 | 066 | 0.721328 | 0.438255 | 0.688292 |
| 0 | 067 | 0.833526 | 0.941239 | 0.171878 |
| 0 | 068 | 0.270469 | 0.058714 | 0.295947 |
| 0 | 069 | 0.263915 | 0.563570 | 0.796779 |
| 0 | 070 | 0.274427 | 0.427836 | 0.293654 |
| 0 | 071 | 0.259534 | 0.924583 | 0.786955 |
| 0 | 072 | 0.758840 | 0.932116 | 0.707643 |
| 0 | 073 | 0.774190 | 0.455780 | 0.212044 |
| 0 | 074 | 0.759530 | 0.558251 | 0.742468 |
| 0 | 075 | 0.773484 | 0.056013 | 0.209859 |
| 0 | 076 | 0.313544 | 0.120573 | 0.606941 |
| 0 | 077 | 0.226877 | 0.617570 | 0.113199 |
| 0 | 078 | 0.316800 | 0.373082 | 0.610007 |
| 0 | 079 | 0.222712 | 0.868938 | 0.103526 |
| 0 | 080 | 0.712954 | 0.873597 | 0.372487 |
| 0 | 081 | 0.806042 | 0.356263 | 0.890779 |
| 0 | 082 | 0.720994 | 0.632901 | 0.427129 |
| 0 | 083 | 0.809132 | 0.122699 | 0.895176 |
| 0 | 084 | 0.218944 | 0.044325 | 0.530978 |
| 0 | 085 | 0.316958 | 0.536842 | 0.033844 |
| 0 | 086 | 0.218617 | 0.438910 | 0.521958 |
| 0 | 087 | 0.317518 | 0.940755 | 0.018964 |
| 0 | 088 | 0.814301 | 0.926596 | 0.470407 |
| 0 | 089 | 0.721065 | 0.443066 | 0.965749 |
| 0 | 090 | 0.823201 | 0.562656 | 0.494425 |
| 0 | 091 | 0.716079 | 0.052625 | 0.985643 |
| 0 | 092 | 0.314981 | 0.990300 | 0.637203 |
| 0 | 093 | 0.218200 | 0.487122 | 0.139023 |
| 0 | 094 | 0.304782 | 0.503499 | 0.631972 |
| 0 | 095 | 0.227319 | 0.999105 | 0.132406 |
| 0 | 096 | 0.730061 | 0.004266 | 0.377253 |

|   |      |          |          |          |
|---|------|----------|----------|----------|
| 0 | 097  | 0.827982 | 0.486229 | 0.873381 |
| 0 | 098  | 0.731741 | 0.505921 | 0.381542 |
| 0 | 099  | 0.801781 | 0.992273 | 0.869916 |
| 0 | 0100 | 0.129003 | 0.127864 | 0.602131 |
| 0 | 0101 | 0.403289 | 0.624143 | 0.102846 |
| 0 | 0102 | 0.127930 | 0.361992 | 0.603428 |
| 0 | 0103 | 0.409141 | 0.860619 | 0.093306 |
| 0 | 0104 | 0.909531 | 0.856379 | 0.388897 |
| 0 | 0105 | 0.629885 | 0.358281 | 0.901246 |
| 0 | 0106 | 0.912981 | 0.634643 | 0.399233 |
| 0 | 0107 | 0.622995 | 0.126307 | 0.901609 |
| 0 | 0108 | 0.103779 | 0.058228 | 0.441239 |
| 0 | 0109 | 0.431804 | 0.553546 | 0.944131 |
| 0 | 0110 | 0.097383 | 0.436481 | 0.449192 |
| 0 | 0111 | 0.438824 | 0.941430 | 0.946352 |
| 0 | 0112 | 0.931156 | 0.920147 | 0.555861 |
| 0 | 0113 | 0.613912 | 0.418242 | 0.073671 |
| 0 | 0114 | 0.945537 | 0.562732 | 0.555408 |
| 0 | 0115 | 0.596946 | 0.055411 | 0.062646 |
| 0 | 0116 | 0.143382 | 0.060606 | 0.253015 |
| 0 | 0117 | 0.390777 | 0.556680 | 0.756905 |
| 0 | 0118 | 0.145149 | 0.420543 | 0.267277 |
| 0 | 0119 | 0.389182 | 0.924831 | 0.765832 |
| 0 | 0120 | 0.886906 | 0.948916 | 0.737602 |
| 0 | 0121 | 0.648383 | 0.450047 | 0.258649 |
| 0 | 0122 | 0.889327 | 0.554208 | 0.733602 |
| 0 | 0123 | 0.645628 | 0.055121 | 0.246492 |
| 0 | 0124 | 0.112078 | 0.946320 | 0.337181 |
| 0 | 0125 | 0.430096 | 0.442957 | 0.836580 |
| 0 | 0126 | 0.117036 | 0.541511 | 0.332626 |
| 0 | 0127 | 0.428028 | 0.044387 | 0.824000 |
| 0 | 0128 | 0.949554 | 0.039630 | 0.629762 |
| 0 | 0129 | 0.594433 | 0.540201 | 0.137189 |
| 0 | 0130 | 0.942917 | 0.447695 | 0.647186 |
| 0 | 0131 | 0.607480 | 0.942335 | 0.164799 |
| 0 | 0132 | 0.225357 | 0.131457 | 0.148102 |
| 0 | 0133 | 0.316259 | 0.634535 | 0.651087 |
| 0 | 0134 | 0.225000 | 0.354257 | 0.150573 |
| 0 | 0135 | 0.316032 | 0.857317 | 0.642690 |
| 0 | 0136 | 0.820010 | 0.862925 | 0.844589 |
| 0 | 0137 | 0.733189 | 0.374903 | 0.354069 |
| 0 | 0138 | 0.829938 | 0.619583 | 0.876527 |
| 0 | 0139 | 0.721671 | 0.133921 | 0.348828 |
| 0 | 0140 | 0.519865 | 0.847088 | 0.199025 |

|   |      |          |          |          |
|---|------|----------|----------|----------|
| 0 | 0141 | 0.021644 | 0.352593 | 0.718717 |
| 0 | 0142 | 0.516377 | 0.636174 | 0.201983 |
| 0 | 0143 | 0.019515 | 0.137745 | 0.711120 |
| 0 | 0144 | 0.519477 | 0.135500 | 0.781261 |
| 0 | 0145 | 0.022226 | 0.628557 | 0.290472 |
| 0 | 0146 | 0.522468 | 0.353808 | 0.787864 |
| 0 | 0147 | 0.020329 | 0.859455 | 0.283109 |
| 0 | 0148 | 0.405019 | 0.835654 | 0.286574 |
| 0 | 0149 | 0.138958 | 0.334539 | 0.795661 |
| 0 | 0150 | 0.404372 | 0.655058 | 0.294268 |
| 0 | 0151 | 0.135061 | 0.152932 | 0.795673 |
| 0 | 0152 | 0.637445 | 0.149301 | 0.707868 |
| 0 | 0153 | 0.911029 | 0.652536 | 0.202950 |
| 0 | 0154 | 0.638593 | 0.335761 | 0.707083 |
| 0 | 0155 | 0.907147 | 0.832474 | 0.196049 |
| 0 | 0156 | 0.443875 | 0.742639 | 0.158411 |
| 0 | 0157 | 0.091233 | 0.244811 | 0.669593 |
| 0 | 0158 | 0.590322 | 0.243147 | 0.828309 |
| 0 | 0159 | 0.961313 | 0.744782 | 0.321824 |
| 0 | 0160 | 0.336812 | 0.851124 | 0.449985 |
| 0 | 0161 | 0.208010 | 0.352718 | 0.957320 |
| 0 | 0162 | 0.336216 | 0.633540 | 0.456982 |
| 0 | 0163 | 0.207688 | 0.134544 | 0.954679 |
| 0 | 0164 | 0.704222 | 0.158164 | 0.542095 |
| 0 | 0165 | 0.827466 | 0.666067 | 0.060048 |
| 0 | 0166 | 0.707448 | 0.349334 | 0.543043 |
| 0 | 0167 | 0.834114 | 0.843126 | 0.036706 |
| 0 | 0168 | 0.274177 | 0.834425 | 0.279117 |
| 0 | 0169 | 0.269869 | 0.334522 | 0.786466 |
| 0 | 0170 | 0.273882 | 0.658409 | 0.288372 |
| 0 | 0171 | 0.265668 | 0.158882 | 0.782751 |
| 0 | 0172 | 0.767527 | 0.158064 | 0.714352 |
| 0 | 0173 | 0.784349 | 0.630906 | 0.238670 |
| 0 | 0174 | 0.768599 | 0.317438 | 0.710107 |
| 0 | 0175 | 0.776840 | 0.827021 | 0.211479 |
| 0 | 0176 | 0.299931 | 0.744175 | 0.549579 |
| 0 | 0177 | 0.244654 | 0.242991 | 0.052249 |
| 0 | 0178 | 0.743409 | 0.252735 | 0.418154 |
| 0 | 0179 | 0.797582 | 0.744577 | 0.911831 |
| 0 | 0180 | 0.215216 | 0.843255 | 0.517546 |
| 0 | 0181 | 0.328244 | 0.343321 | 0.029158 |
| 0 | 0182 | 0.215426 | 0.643678 | 0.526580 |
| 0 | 0183 | 0.328205 | 0.141602 | 0.027466 |
| 0 | 0184 | 0.824088 | 0.152792 | 0.467971 |

|    |       |          |          |          |
|----|-------|----------|----------|----------|
| O  | O185  | 0.715475 | 0.647075 | 0.964035 |
| O  | O186  | 0.829859 | 0.343825 | 0.478127 |
| O  | O187  | 0.714785 | 0.842166 | 0.960998 |
| O  | O188  | 0.134844 | 0.744304 | 0.569904 |
| O  | O189  | 0.408582 | 0.241832 | 0.072221 |
| O  | O190  | 0.911667 | 0.246529 | 0.419669 |
| O  | O191  | 0.631613 | 0.744057 | 0.914041 |
| O  | O192  | 0.096982 | 0.833901 | 0.436940 |
| O  | O193  | 0.443108 | 0.331379 | 0.938472 |
| O  | O194  | 0.099211 | 0.650552 | 0.441801 |
| O  | O195  | 0.442308 | 0.152839 | 0.935324 |
| O  | O196  | 0.936669 | 0.161927 | 0.564092 |
| O  | O197  | 0.600677 | 0.659792 | 0.057122 |
| O  | O198  | 0.944450 | 0.328322 | 0.565697 |
| O  | O199  | 0.596108 | 0.839733 | 0.041009 |
| O  | O200  | 0.145522 | 0.831812 | 0.253146 |
| O  | O201  | 0.397517 | 0.329268 | 0.752052 |
| O  | O202  | 0.146118 | 0.659103 | 0.257069 |
| O  | O203  | 0.393974 | 0.160968 | 0.751636 |
| O  | O204  | 0.892789 | 0.128868 | 0.745405 |
| O  | O205  | 0.642530 | 0.641276 | 0.242953 |
| O  | O206  | 0.893890 | 0.347142 | 0.747007 |
| O  | O207  | 0.646951 | 0.822220 | 0.220470 |
| O  | O208  | 0.221251 | 0.744121 | 0.161239 |
| O  | O209  | 0.317559 | 0.246598 | 0.658995 |
| O  | O210  | 0.840916 | 0.238703 | 0.822264 |
| O  | O211  | 0.720135 | 0.745397 | 0.337554 |
| O  | O212  | 0.741662 | 0.777216 | 0.592255 |
| Al | Al213 | 0.715635 | 0.659513 | 0.298127 |
| Si | Si214 | 0.444465 | 0.052086 | 0.188922 |
| Si | Si215 | 0.094748 | 0.554937 | 0.691004 |
| Si | Si216 | 0.448056 | 0.432383 | 0.188846 |
| Si | Si217 | 0.091148 | 0.934171 | 0.684159 |
| Si | Si218 | 0.592885 | 0.940012 | 0.810085 |
| Si | Si219 | 0.944402 | 0.441624 | 0.318985 |
| Si | Si220 | 0.590407 | 0.545696 | 0.825714 |
| Si | Si221 | 0.943012 | 0.048979 | 0.319400 |
| Si | Si222 | 0.337101 | 0.025769 | 0.340531 |
| Si | Si223 | 0.200656 | 0.525813 | 0.844264 |
| Si | Si224 | 0.338867 | 0.464188 | 0.339295 |
| Si | Si225 | 0.198346 | 0.964323 | 0.836714 |
| Si | Si226 | 0.698546 | 0.968132 | 0.650464 |
| Si | Si227 | 0.842621 | 0.466590 | 0.152440 |
| Si | Si228 | 0.704491 | 0.517253 | 0.680609 |



|    |       |          |          |          |
|----|-------|----------|----------|----------|
| Si | Si229 | 0.837741 | 0.021880 | 0.159982 |
| Si | Si230 | 0.296433 | 0.048566 | 0.559100 |
| Si | Si231 | 0.240032 | 0.545460 | 0.063092 |
| Si | Si232 | 0.295216 | 0.441842 | 0.556143 |
| Si | Si233 | 0.240914 | 0.939973 | 0.053358 |
| Si | Si234 | 0.737974 | 0.935844 | 0.439265 |
| Si | Si235 | 0.798309 | 0.428099 | 0.944384 |
| Si | Si236 | 0.745523 | 0.559593 | 0.467594 |
| Si | Si237 | 0.792006 | 0.052403 | 0.948210 |
| Si | Si238 | 0.141010 | 0.056719 | 0.547441 |
| Si | Si239 | 0.394425 | 0.552000 | 0.050069 |
| Si | Si240 | 0.141258 | 0.433013 | 0.549510 |
| Si | Si241 | 0.394847 | 0.933511 | 0.045638 |
| Si | Si242 | 0.892639 | 0.923642 | 0.450680 |
| Si | Si243 | 0.642910 | 0.426963 | 0.962203 |
| Si | Si244 | 0.899321 | 0.565194 | 0.457456 |
| Si | Si245 | 0.638367 | 0.057188 | 0.959829 |
| Si | Si246 | 0.094583 | 0.025401 | 0.331915 |
| Si | Si247 | 0.441558 | 0.523043 | 0.833661 |
| Si | Si248 | 0.095049 | 0.463446 | 0.335419 |
| Si | Si249 | 0.442698 | 0.964918 | 0.831234 |
| Si | Si250 | 0.944642 | 0.960973 | 0.658040 |
| Si | Si251 | 0.595495 | 0.462709 | 0.171258 |
| Si | Si252 | 0.948294 | 0.527535 | 0.664299 |
| Si | Si253 | 0.592616 | 0.021925 | 0.172518 |
| Si | Si254 | 0.216737 | 0.061670 | 0.206996 |
| Si | Si255 | 0.318680 | 0.563783 | 0.709140 |
| Si | Si256 | 0.215895 | 0.423023 | 0.212228 |
| Si | Si257 | 0.319708 | 0.925030 | 0.707779 |
| Si | Si258 | 0.816996 | 0.934471 | 0.789305 |
| Si | Si259 | 0.722175 | 0.446444 | 0.301246 |
| Si | Si260 | 0.826872 | 0.553810 | 0.807370 |
| Si | Si261 | 0.717728 | 0.061769 | 0.295298 |
| Si | Si262 | 0.444836 | 0.821334 | 0.184152 |
| Si | Si263 | 0.094688 | 0.323272 | 0.696838 |
| Si | Si264 | 0.442784 | 0.664559 | 0.189064 |
| Si | Si265 | 0.093436 | 0.165948 | 0.694449 |
| Si | Si266 | 0.592600 | 0.163936 | 0.804871 |
| Si | Si267 | 0.951875 | 0.665529 | 0.303513 |
| Si | Si268 | 0.595057 | 0.322408 | 0.806466 |
| Si | Si269 | 0.949728 | 0.822868 | 0.297214 |
| Si | Si270 | 0.338044 | 0.866944 | 0.332243 |
| Si | Si271 | 0.205885 | 0.367171 | 0.839305 |
| Si | Si272 | 0.337401 | 0.622400 | 0.337853 |

|    |       |          |          |          |
|----|-------|----------|----------|----------|
| Si | Si273 | 0.203901 | 0.122431 | 0.836143 |
| Si | Si274 | 0.705345 | 0.128074 | 0.653782 |
| Si | Si275 | 0.842341 | 0.623185 | 0.159636 |
| Si | Si276 | 0.708539 | 0.360039 | 0.662263 |
| Si | Si277 | 0.838135 | 0.861362 | 0.153424 |
| Si | Si278 | 0.291605 | 0.823748 | 0.540166 |
| Si | Si279 | 0.251661 | 0.322922 | 0.047582 |
| Si | Si280 | 0.291794 | 0.664398 | 0.545902 |
| Si | Si281 | 0.251771 | 0.163170 | 0.045423 |
| Si | Si282 | 0.748358 | 0.174234 | 0.444575 |
| Si | Si283 | 0.792371 | 0.668799 | 0.953062 |
| Si | Si284 | 0.753381 | 0.329977 | 0.448592 |
| Si | Si285 | 0.791509 | 0.822978 | 0.939364 |
| Si | Si286 | 0.138992 | 0.821901 | 0.537837 |
| Si | Si287 | 0.404477 | 0.319929 | 0.042451 |
| Si | Si288 | 0.139177 | 0.665829 | 0.543124 |
| Si | Si289 | 0.404804 | 0.164166 | 0.040129 |
| Si | Si290 | 0.901961 | 0.169821 | 0.456158 |
| Si | Si291 | 0.638238 | 0.667352 | 0.951848 |
| Si | Si292 | 0.906371 | 0.322735 | 0.460104 |
| Si | Si293 | 0.637963 | 0.822544 | 0.941569 |
| Si | Si294 | 0.094036 | 0.867759 | 0.327295 |
| Si | Si295 | 0.448164 | 0.364413 | 0.828605 |
| Si | Si296 | 0.096590 | 0.619850 | 0.330466 |
| Si | Si297 | 0.445780 | 0.123268 | 0.823200 |
| Si | Si298 | 0.949331 | 0.117373 | 0.662873 |
| Si | Si299 | 0.589926 | 0.619768 | 0.161545 |
| Si | Si300 | 0.950550 | 0.368748 | 0.669836 |
| Si | Si301 | 0.592552 | 0.863010 | 0.156224 |
| Si | Si302 | 0.215949 | 0.820675 | 0.199304 |
| Si | Si303 | 0.325396 | 0.321866 | 0.701799 |
| Si | Si304 | 0.217201 | 0.668803 | 0.204702 |
| Si | Si305 | 0.322664 | 0.170675 | 0.699993 |
| Si | Si306 | 0.827399 | 0.161616 | 0.793598 |
| Si | Si307 | 0.827349 | 0.315453 | 0.792248 |
| Si | Si308 | 0.714274 | 0.818767 | 0.284630 |
| Zn | Zn309 | 0.728004 | 0.723743 | 0.486612 |

**TS-C<sub>6</sub>H<sub>12</sub>-Dehydro-on-HydroxyO-ZnOH<sup>+</sup> (Fig. 9b/TS1 in Black)**

Total energy = -1960.78825166 eV

data\_

\_audit\_creation\_method 'Materials Studio'

\_cell\_length\_a 20.357621

|                                |     |           |          |          |
|--------------------------------|-----|-----------|----------|----------|
| _cell_length_b                 |     | 20.050598 |          |          |
| _cell_length_c                 |     | 13.476578 |          |          |
| _cell_angle_alpha              |     | 90.000000 |          |          |
| _cell_angle_beta               |     | 90.000000 |          |          |
| _cell_angle_gamma              |     | 90.000000 |          |          |
| _symmetry_space_group_name_H-M |     | 'P1'      |          |          |
| loop_                          |     |           |          |          |
| _atom_site_type_symbol         |     |           |          |          |
| _atom_site_label               |     |           |          |          |
| _atom_site_fract_x             |     |           |          |          |
| _atom_site_fract_y             |     |           |          |          |
| _atom_site_fract_z             |     |           |          |          |
| H                              | H1  | 0.774664  | 0.726638 | 0.647497 |
| H                              | H2  | 0.619125  | 0.800832 | 0.698604 |
| H                              | H3  | 0.543563  | 0.758147 | 0.698521 |
| H                              | H4  | 0.682787  | 0.733961 | 0.615004 |
| H                              | H5  | 0.626798  | 0.676009 | 0.664063 |
| H                              | H6  | 0.526394  | 0.658554 | 0.580646 |
| H                              | H7  | 0.587663  | 0.633475 | 0.497598 |
| H                              | H8  | 0.499563  | 0.698117 | 0.413619 |
| H                              | H9  | 0.574773  | 0.740217 | 0.402525 |
| H                              | H10 | 0.464069  | 0.773098 | 0.548154 |
| H                              | H11 | 0.489938  | 0.821795 | 0.446493 |
| H                              | H12 | 0.534642  | 0.865806 | 0.607276 |
| H                              | H13 | 0.598057  | 0.841570 | 0.526555 |
| C                              | C14 | 0.584352  | 0.774689 | 0.650586 |
| C                              | C15 | 0.616713  | 0.712207 | 0.604779 |
| C                              | C16 | 0.566678  | 0.677576 | 0.533831 |
| C                              | C17 | 0.536977  | 0.724873 | 0.456238 |
| C                              | C18 | 0.507312  | 0.787416 | 0.504096 |
| C                              | C19 | 0.557195  | 0.822301 | 0.571626 |
| O                              | O20 | 0.513664  | 0.032757 | 0.210717 |
| O                              | O21 | 0.020790  | 0.536415 | 0.706744 |
| O                              | O22 | 0.525413  | 0.441214 | 0.199346 |
| O                              | O23 | 0.016709  | 0.948094 | 0.705533 |
| O                              | O24 | 0.526033  | 0.961672 | 0.787525 |
| O                              | O25 | 0.019256  | 0.458745 | 0.281877 |
| O                              | O26 | 0.514512  | 0.550209 | 0.790006 |
| O                              | O27 | 0.023854  | 0.042751 | 0.292398 |
| O                              | O28 | 0.394780  | 0.060661 | 0.274528 |
| O                              | O29 | 0.137569  | 0.559546 | 0.783071 |
| O                              | O30 | 0.404928  | 0.452680 | 0.266380 |
| O                              | O31 | 0.141856  | 0.947494 | 0.752098 |
| O                              | O32 | 0.645669  | 0.936860 | 0.725445 |

|   |     |          |          |          |
|---|-----|----------|----------|----------|
| 0 | 033 | 0.902986 | 0.428589 | 0.206887 |
| 0 | 034 | 0.634258 | 0.539321 | 0.720357 |
| 0 | 035 | 0.897866 | 0.040501 | 0.249069 |
| 0 | 036 | 0.439783 | 0.118729 | 0.111881 |
| 0 | 037 | 0.102120 | 0.620287 | 0.617848 |
| 0 | 038 | 0.432365 | 0.368706 | 0.118973 |
| 0 | 039 | 0.096468 | 0.868915 | 0.607865 |
| 0 | 040 | 0.599466 | 0.874133 | 0.883833 |
| 0 | 041 | 0.943392 | 0.368350 | 0.369389 |
| 0 | 042 | 0.608230 | 0.626197 | 0.863507 |
| 0 | 043 | 0.943981 | 0.121279 | 0.390680 |
| 0 | 044 | 0.408014 | 0.989554 | 0.111897 |
| 0 | 045 | 0.129197 | 0.490097 | 0.617749 |
| 0 | 046 | 0.435944 | 0.499823 | 0.086969 |
| 0 | 047 | 0.102009 | 0.000051 | 0.580353 |
| 0 | 048 | 0.630317 | 0.003030 | 0.891925 |
| 0 | 049 | 0.909247 | 0.496338 | 0.374592 |
| 0 | 050 | 0.606403 | 0.495571 | 0.902522 |
| 0 | 051 | 0.941091 | 0.990270 | 0.420367 |
| 0 | 052 | 0.332678 | 0.062887 | 0.443565 |
| 0 | 053 | 0.202052 | 0.562804 | 0.950746 |
| 0 | 054 | 0.337731 | 0.450608 | 0.432968 |
| 0 | 055 | 0.203432 | 0.947539 | 0.922591 |
| 0 | 056 | 0.709822 | 0.930364 | 0.558623 |
| 0 | 057 | 0.841464 | 0.432562 | 0.036037 |
| 0 | 058 | 0.701560 | 0.532430 | 0.555151 |
| 0 | 059 | 0.837047 | 0.048706 | 0.078083 |
| 0 | 060 | 0.346886 | 0.947395 | 0.348631 |
| 0 | 061 | 0.193452 | 0.449065 | 0.850393 |
| 0 | 062 | 0.325210 | 0.553371 | 0.311189 |
| 0 | 063 | 0.216617 | 0.051027 | 0.802062 |
| 0 | 064 | 0.695643 | 0.047837 | 0.645358 |
| 0 | 065 | 0.855731 | 0.543312 | 0.142636 |
| 0 | 066 | 0.715402 | 0.437232 | 0.690496 |
| 0 | 067 | 0.819552 | 0.941342 | 0.191355 |
| 0 | 068 | 0.265459 | 0.039290 | 0.279793 |
| 0 | 069 | 0.268436 | 0.547788 | 0.784192 |
| 0 | 070 | 0.275825 | 0.436516 | 0.261082 |
| 0 | 071 | 0.271448 | 0.935447 | 0.756299 |
| 0 | 072 | 0.775136 | 0.957907 | 0.722818 |
| 0 | 073 | 0.772988 | 0.447653 | 0.199636 |
| 0 | 074 | 0.763551 | 0.557563 | 0.723244 |
| 0 | 075 | 0.768484 | 0.057099 | 0.243385 |
| 0 | 076 | 0.308343 | 0.133570 | 0.603847 |

|   |      |          |          |          |
|---|------|----------|----------|----------|
| 0 | 077  | 0.235096 | 0.628504 | 0.112509 |
| 0 | 078  | 0.323933 | 0.376002 | 0.589233 |
| 0 | 079  | 0.213240 | 0.870361 | 0.076942 |
| 0 | 080  | 0.729982 | 0.865875 | 0.393139 |
| 0 | 081  | 0.808448 | 0.367214 | 0.874778 |
| 0 | 082  | 0.718801 | 0.624384 | 0.419686 |
| 0 | 083  | 0.825223 | 0.124294 | 0.920913 |
| 0 | 084  | 0.221974 | 0.042441 | 0.543297 |
| 0 | 085  | 0.316511 | 0.537759 | 0.037308 |
| 0 | 086  | 0.217808 | 0.430570 | 0.503073 |
| 0 | 087  | 0.321244 | 0.926338 | 0.999301 |
| 0 | 088  | 0.819732 | 0.952220 | 0.455494 |
| 0 | 089  | 0.724220 | 0.453213 | 0.954458 |
| 0 | 090  | 0.822386 | 0.556605 | 0.490924 |
| 0 | 091  | 0.719026 | 0.066740 | 0.999642 |
| 0 | 092  | 0.335965 | 0.004749 | 0.619248 |
| 0 | 093  | 0.206074 | 0.499099 | 0.121994 |
| 0 | 094  | 0.299923 | 0.505586 | 0.603494 |
| 0 | 095  | 0.235761 | 0.000018 | 0.096668 |
| 0 | 096  | 0.704923 | 0.995225 | 0.388868 |
| 0 | 097  | 0.831777 | 0.497747 | 0.866978 |
| 0 | 098  | 0.736748 | 0.498218 | 0.372059 |
| 0 | 099  | 0.807348 | 0.993587 | 0.905823 |
| 0 | 0100 | 0.128450 | 0.130137 | 0.587252 |
| 0 | 0101 | 0.402596 | 0.629126 | 0.094092 |
| 0 | 0102 | 0.119304 | 0.360826 | 0.579120 |
| 0 | 0103 | 0.421151 | 0.859792 | 0.077996 |
| 0 | 0104 | 0.910709 | 0.861328 | 0.411294 |
| 0 | 0105 | 0.636600 | 0.366241 | 0.888369 |
| 0 | 0106 | 0.915184 | 0.627488 | 0.401150 |
| 0 | 0107 | 0.621220 | 0.134005 | 0.915044 |
| 0 | 0108 | 0.124672 | 0.066703 | 0.415015 |
| 0 | 0109 | 0.418499 | 0.568741 | 0.921734 |
| 0 | 0110 | 0.095820 | 0.447869 | 0.438045 |
| 0 | 0111 | 0.442860 | 0.944821 | 0.934179 |
| 0 | 0112 | 0.915274 | 0.923610 | 0.584804 |
| 0 | 0113 | 0.618992 | 0.421604 | 0.063442 |
| 0 | 0114 | 0.945766 | 0.546173 | 0.548773 |
| 0 | 0115 | 0.597038 | 0.055164 | 0.065694 |
| 0 | 0116 | 0.142455 | 0.039205 | 0.222399 |
| 0 | 0117 | 0.393199 | 0.538851 | 0.731945 |
| 0 | 0118 | 0.145129 | 0.427601 | 0.257509 |
| 0 | 0119 | 0.402210 | 0.930971 | 0.747116 |
| 0 | 0120 | 0.898611 | 0.953532 | 0.777158 |

|   |      |          |          |          |
|---|------|----------|----------|----------|
| 0 | 0121 | 0.647791 | 0.446809 | 0.252444 |
| 0 | 0122 | 0.894189 | 0.565941 | 0.728270 |
| 0 | 0123 | 0.637656 | 0.060598 | 0.253054 |
| 0 | 0124 | 0.105064 | 0.944850 | 0.348327 |
| 0 | 0125 | 0.441216 | 0.448068 | 0.853951 |
| 0 | 0126 | 0.113013 | 0.549170 | 0.315163 |
| 0 | 0127 | 0.430446 | 0.050318 | 0.817890 |
| 0 | 0128 | 0.936006 | 0.045998 | 0.647947 |
| 0 | 0129 | 0.599632 | 0.541754 | 0.134602 |
| 0 | 0130 | 0.928912 | 0.444565 | 0.673213 |
| 0 | 0131 | 0.607420 | 0.944310 | 0.170600 |
| 0 | 0132 | 0.224558 | 0.126049 | 0.143710 |
| 0 | 0133 | 0.318902 | 0.630873 | 0.650540 |
| 0 | 0134 | 0.216427 | 0.366110 | 0.123414 |
| 0 | 0135 | 0.332101 | 0.871856 | 0.610553 |
| 0 | 0136 | 0.815176 | 0.867954 | 0.855234 |
| 0 | 0137 | 0.730968 | 0.367683 | 0.343145 |
| 0 | 0138 | 0.821362 | 0.630911 | 0.857140 |
| 0 | 0139 | 0.708173 | 0.127765 | 0.381460 |
| 0 | 0140 | 0.516389 | 0.852509 | 0.213887 |
| 0 | 0141 | 0.021902 | 0.354244 | 0.711993 |
| 0 | 0142 | 0.512948 | 0.630711 | 0.198732 |
| 0 | 0143 | 0.023936 | 0.135720 | 0.706329 |
| 0 | 0144 | 0.523431 | 0.140661 | 0.782502 |
| 0 | 0145 | 0.020878 | 0.640882 | 0.285856 |
| 0 | 0146 | 0.524939 | 0.358050 | 0.785305 |
| 0 | 0147 | 0.015980 | 0.855394 | 0.292648 |
| 0 | 0148 | 0.393593 | 0.836185 | 0.267557 |
| 0 | 0149 | 0.143536 | 0.338800 | 0.769796 |
| 0 | 0150 | 0.400809 | 0.659596 | 0.286746 |
| 0 | 0151 | 0.141767 | 0.157681 | 0.780442 |
| 0 | 0152 | 0.645163 | 0.157205 | 0.724255 |
| 0 | 0153 | 0.905546 | 0.657288 | 0.207747 |
| 0 | 0154 | 0.638365 | 0.330794 | 0.698570 |
| 0 | 0155 | 0.898433 | 0.837512 | 0.217184 |
| 0 | 0156 | 0.451016 | 0.743995 | 0.155879 |
| 0 | 0157 | 0.088520 | 0.245625 | 0.657089 |
| 0 | 0158 | 0.589848 | 0.249189 | 0.836968 |
| 0 | 0159 | 0.948651 | 0.746129 | 0.339019 |
| 0 | 0160 | 0.321025 | 0.828696 | 0.425341 |
| 0 | 0161 | 0.208419 | 0.331222 | 0.934252 |
| 0 | 0162 | 0.337104 | 0.645128 | 0.456066 |
| 0 | 0163 | 0.205789 | 0.141143 | 0.949484 |
| 0 | 0164 | 0.719804 | 0.167355 | 0.568935 |

|   |      |          |          |          |
|---|------|----------|----------|----------|
| 0 | 0165 | 0.833795 | 0.655949 | 0.048688 |
| 0 | 0166 | 0.708502 | 0.353535 | 0.535746 |
| 0 | 0167 | 0.832749 | 0.848593 | 0.049036 |
| 0 | 0168 | 0.265898 | 0.865234 | 0.255609 |
| 0 | 0169 | 0.272417 | 0.360908 | 0.767943 |
| 0 | 0170 | 0.269722 | 0.670629 | 0.293725 |
| 0 | 0171 | 0.272966 | 0.168340 | 0.788070 |
| 0 | 0172 | 0.773237 | 0.131668 | 0.741135 |
| 0 | 0173 | 0.777983 | 0.634193 | 0.225159 |
| 0 | 0174 | 0.769512 | 0.318556 | 0.700000 |
| 0 | 0175 | 0.767998 | 0.821876 | 0.213793 |
| 0 | 0176 | 0.299874 | 0.747091 | 0.572856 |
| 0 | 0177 | 0.241589 | 0.242993 | 0.068278 |
| 0 | 0178 | 0.745046 | 0.250203 | 0.422641 |
| 0 | 0179 | 0.796275 | 0.750084 | 0.925413 |
| 0 | 0180 | 0.214451 | 0.844942 | 0.535880 |
| 0 | 0181 | 0.324857 | 0.340008 | 0.018535 |
| 0 | 0182 | 0.216722 | 0.647714 | 0.530323 |
| 0 | 0183 | 0.326130 | 0.145795 | 0.022746 |
| 0 | 0184 | 0.826147 | 0.148697 | 0.459821 |
| 0 | 0185 | 0.714583 | 0.651055 | 0.969596 |
| 0 | 0186 | 0.830411 | 0.346987 | 0.466561 |
| 0 | 0187 | 0.712813 | 0.847390 | 0.974384 |
| 0 | 0188 | 0.131535 | 0.744330 | 0.573280 |
| 0 | 0189 | 0.408843 | 0.243762 | 0.071997 |
| 0 | 0190 | 0.911815 | 0.246768 | 0.423246 |
| 0 | 0191 | 0.631470 | 0.749254 | 0.920703 |
| 0 | 0192 | 0.109376 | 0.823737 | 0.422355 |
| 0 | 0193 | 0.440578 | 0.327986 | 0.929737 |
| 0 | 0194 | 0.105642 | 0.656732 | 0.430529 |
| 0 | 0195 | 0.438264 | 0.160638 | 0.926231 |
| 0 | 0196 | 0.930580 | 0.167633 | 0.575801 |
| 0 | 0197 | 0.596507 | 0.660326 | 0.054594 |
| 0 | 0198 | 0.944143 | 0.337247 | 0.559102 |
| 0 | 0199 | 0.600702 | 0.830658 | 0.069271 |
| 0 | 0200 | 0.138357 | 0.842460 | 0.232542 |
| 0 | 0201 | 0.400065 | 0.346010 | 0.743042 |
| 0 | 0202 | 0.144017 | 0.667048 | 0.242601 |
| 0 | 0203 | 0.399375 | 0.166091 | 0.738017 |
| 0 | 0204 | 0.901560 | 0.147000 | 0.765408 |
| 0 | 0205 | 0.637762 | 0.646056 | 0.242393 |
| 0 | 0206 | 0.896827 | 0.326025 | 0.742323 |
| 0 | 0207 | 0.640860 | 0.831963 | 0.257379 |
| 0 | 0208 | 0.224498 | 0.754713 | 0.161727 |

|    |       |          |          |          |
|----|-------|----------|----------|----------|
| O  | O209  | 0.319284 | 0.257142 | 0.663949 |
| O  | O210  | 0.820418 | 0.239817 | 0.834463 |
| O  | O211  | 0.714389 | 0.741568 | 0.346877 |
| O  | O212  | 0.744027 | 0.753573 | 0.609535 |
| Al | Al213 | 0.712858 | 0.658261 | 0.296306 |
| Si | Si214 | 0.439423 | 0.050450 | 0.176203 |
| Si | Si215 | 0.097046 | 0.551482 | 0.680280 |
| Si | Si216 | 0.448868 | 0.440741 | 0.167555 |
| Si | Si217 | 0.090233 | 0.941143 | 0.661389 |
| Si | Si218 | 0.600077 | 0.943998 | 0.823268 |
| Si | Si219 | 0.944271 | 0.438198 | 0.308696 |
| Si | Si220 | 0.591430 | 0.552701 | 0.820166 |
| Si | Si221 | 0.950599 | 0.048829 | 0.338012 |
| Si | Si222 | 0.334834 | 0.027179 | 0.335976 |
| Si | Si223 | 0.200592 | 0.529430 | 0.841321 |
| Si | Si224 | 0.335957 | 0.473214 | 0.317795 |
| Si | Si225 | 0.208325 | 0.970527 | 0.807932 |
| Si | Si226 | 0.706577 | 0.968480 | 0.664210 |
| Si | Si227 | 0.843055 | 0.463845 | 0.146978 |
| Si | Si228 | 0.703745 | 0.516432 | 0.672775 |
| Si | Si229 | 0.830976 | 0.021694 | 0.190845 |
| Si | Si230 | 0.299533 | 0.061084 | 0.552672 |
| Si | Si231 | 0.239936 | 0.557436 | 0.056215 |
| Si | Si232 | 0.294716 | 0.440591 | 0.532732 |
| Si | Si233 | 0.243637 | 0.936050 | 0.024512 |
| Si | Si234 | 0.741588 | 0.936146 | 0.449160 |
| Si | Si235 | 0.801269 | 0.437381 | 0.932659 |
| Si | Si236 | 0.745274 | 0.552376 | 0.459257 |
| Si | Si237 | 0.796933 | 0.058412 | 0.975457 |
| Si | Si238 | 0.144471 | 0.060173 | 0.531391 |
| Si | Si239 | 0.393537 | 0.559023 | 0.035352 |
| Si | Si240 | 0.140824 | 0.432660 | 0.534423 |
| Si | Si241 | 0.397994 | 0.930384 | 0.030897 |
| Si | Si242 | 0.896452 | 0.931304 | 0.468240 |
| Si | Si243 | 0.646735 | 0.434066 | 0.952178 |
| Si | Si244 | 0.898356 | 0.556669 | 0.453134 |
| Si | Si245 | 0.642214 | 0.064618 | 0.967952 |
| Si | Si246 | 0.098869 | 0.023486 | 0.320152 |
| Si | Si247 | 0.442019 | 0.526604 | 0.824785 |
| Si | Si248 | 0.093300 | 0.470780 | 0.322408 |
| Si | Si249 | 0.450274 | 0.971872 | 0.821225 |
| Si | Si250 | 0.941729 | 0.967674 | 0.678432 |
| Si | Si251 | 0.597898 | 0.463351 | 0.162387 |
| Si | Si252 | 0.947338 | 0.523331 | 0.664765 |



|    |       |          |          |          |
|----|-------|----------|----------|----------|
| Si | Si253 | 0.589212 | 0.023216 | 0.175742 |
| Si | Si254 | 0.217269 | 0.050732 | 0.185691 |
| Si | Si255 | 0.319863 | 0.555261 | 0.693245 |
| Si | Si256 | 0.211262 | 0.432699 | 0.190694 |
| Si | Si257 | 0.334839 | 0.936085 | 0.683181 |
| Si | Si258 | 0.823849 | 0.943484 | 0.815146 |
| Si | Si259 | 0.722391 | 0.440114 | 0.291433 |
| Si | Si260 | 0.827787 | 0.562315 | 0.794811 |
| Si | Si261 | 0.705236 | 0.059901 | 0.316483 |
| Si | Si262 | 0.445557 | 0.822875 | 0.178883 |
| Si | Si263 | 0.093198 | 0.324654 | 0.679636 |
| Si | Si264 | 0.442329 | 0.665932 | 0.183734 |
| Si | Si265 | 0.095733 | 0.167242 | 0.682827 |
| Si | Si266 | 0.594722 | 0.170129 | 0.814789 |
| Si | Si267 | 0.947355 | 0.667996 | 0.308147 |
| Si | Si268 | 0.597231 | 0.325995 | 0.802241 |
| Si | Si269 | 0.943556 | 0.824948 | 0.315048 |
| Si | Si270 | 0.331718 | 0.869731 | 0.323544 |
| Si | Si271 | 0.204641 | 0.370375 | 0.829736 |
| Si | Si272 | 0.333766 | 0.631949 | 0.337191 |
| Si | Si273 | 0.208735 | 0.129342 | 0.830332 |
| Si | Si274 | 0.708848 | 0.125829 | 0.670406 |
| Si | Si275 | 0.841349 | 0.622531 | 0.157723 |
| Si | Si276 | 0.707351 | 0.359872 | 0.655754 |
| Si | Si277 | 0.830319 | 0.862650 | 0.167477 |
| Si | Si278 | 0.291667 | 0.823472 | 0.536607 |
| Si | Si279 | 0.248086 | 0.320483 | 0.036978 |
| Si | Si280 | 0.293077 | 0.668054 | 0.551251 |
| Si | Si281 | 0.249446 | 0.164369 | 0.044924 |
| Si | Si282 | 0.749811 | 0.173309 | 0.457983 |
| Si | Si283 | 0.791247 | 0.671481 | 0.950823 |
| Si | Si284 | 0.753730 | 0.329232 | 0.442661 |
| Si | Si285 | 0.789325 | 0.828143 | 0.952034 |
| Si | Si286 | 0.137960 | 0.820762 | 0.534802 |
| Si | Si287 | 0.401878 | 0.320554 | 0.034789 |
| Si | Si288 | 0.139209 | 0.667231 | 0.538037 |
| Si | Si289 | 0.403035 | 0.167225 | 0.033491 |
| Si | Si290 | 0.903194 | 0.170805 | 0.462567 |
| Si | Si291 | 0.637601 | 0.671270 | 0.953167 |
| Si | Si292 | 0.907175 | 0.324813 | 0.454382 |
| Si | Si293 | 0.636203 | 0.825194 | 0.961824 |
| Si | Si294 | 0.092114 | 0.866743 | 0.323607 |
| Si | Si295 | 0.451279 | 0.369862 | 0.827738 |
| Si | Si296 | 0.095975 | 0.628266 | 0.319075 |

|    |       |          |          |          |
|----|-------|----------|----------|----------|
| Si | Si297 | 0.447792 | 0.129346 | 0.816304 |
| Si | Si298 | 0.948057 | 0.124059 | 0.674049 |
| Si | Si299 | 0.588087 | 0.620364 | 0.159643 |
| Si | Si300 | 0.947715 | 0.365788 | 0.671506 |
| Si | Si301 | 0.591311 | 0.865099 | 0.177245 |
| Si | Si302 | 0.210389 | 0.832762 | 0.183097 |
| Si | Si303 | 0.328852 | 0.334902 | 0.692145 |
| Si | Si304 | 0.218075 | 0.679101 | 0.202351 |
| Si | Si305 | 0.325345 | 0.180257 | 0.698474 |
| Si | Si306 | 0.830053 | 0.160942 | 0.814166 |
| Si | Si307 | 0.824155 | 0.314063 | 0.788117 |
| Si | Si308 | 0.713347 | 0.816997 | 0.301464 |
| Zn | Zn309 | 0.698628 | 0.714002 | 0.490930 |

**M-C<sub>6</sub>H<sub>11</sub>Zn-OH<sub>2</sub>-ZnOH<sup>+</sup> (Fig. 9b/M2 in Black)** Total energy = -1962.17053776 eV

data\_

\_audit\_creation\_method 'Materials Studio'

\_cell\_length\_a 20.357621

\_cell\_length\_b 20.050598

\_cell\_length\_c 13.476578

\_cell\_angle\_alpha 90.000000

\_cell\_angle\_beta 90.000000

\_cell\_angle\_gamma 90.000000

\_symmetry\_space\_group\_name\_H-M 'P1'

loop\_

\_atom\_site\_type\_symbol

\_atom\_site\_label

\_atom\_site\_fract\_x

\_atom\_site\_fract\_y

\_atom\_site\_fract\_z

|   |     |          |          |          |
|---|-----|----------|----------|----------|
| H | H1  | 0.777226 | 0.724559 | 0.531071 |
| H | H2  | 0.747838 | 0.755586 | 0.627704 |
| H | H3  | 0.542329 | 0.623960 | 0.598207 |
| H | H4  | 0.466172 | 0.660183 | 0.568697 |
| H | H5  | 0.541037 | 0.681758 | 0.431817 |
| H | H6  | 0.463407 | 0.771252 | 0.465548 |
| H | H7  | 0.537671 | 0.808025 | 0.427874 |
| H | H8  | 0.489489 | 0.867325 | 0.574026 |
| H | H9  | 0.566146 | 0.832169 | 0.604116 |
| H | H10 | 0.431531 | 0.772072 | 0.653706 |
| H | H11 | 0.485715 | 0.808788 | 0.739034 |
| H | H12 | 0.493349 | 0.684465 | 0.743355 |
| H | H13 | 0.568681 | 0.720664 | 0.708509 |

|   |     |          |          |          |
|---|-----|----------|----------|----------|
| C | C14 | 0.517654 | 0.672017 | 0.587632 |
| C | C15 | 0.547525 | 0.710746 | 0.500405 |
| C | C16 | 0.514913 | 0.779358 | 0.488135 |
| C | C17 | 0.515167 | 0.819731 | 0.584699 |
| C | C18 | 0.483864 | 0.780227 | 0.669963 |
| C | C19 | 0.517654 | 0.712518 | 0.684044 |
| O | O20 | 0.488636 | 0.029199 | 0.220367 |
| O | O21 | 0.998108 | 0.531678 | 0.716316 |
| O | O22 | 0.502005 | 0.434986 | 0.209606 |
| O | O23 | 0.984174 | 0.935578 | 0.709719 |
| O | O24 | 0.491542 | 0.947677 | 0.796398 |
| O | O25 | 0.996110 | 0.455394 | 0.294227 |
| O | O26 | 0.492060 | 0.539978 | 0.796310 |
| O | O27 | 0.993811 | 0.035676 | 0.297608 |
| O | O28 | 0.370538 | 0.059407 | 0.288744 |
| O | O29 | 0.115946 | 0.560103 | 0.785745 |
| O | O30 | 0.381853 | 0.443128 | 0.280888 |
| O | O31 | 0.103963 | 0.943981 | 0.781363 |
| O | O32 | 0.605987 | 0.949800 | 0.711993 |
| O | O33 | 0.880413 | 0.436226 | 0.212570 |
| O | O34 | 0.613651 | 0.536875 | 0.735429 |
| O | O35 | 0.872927 | 0.042079 | 0.230301 |
| O | O36 | 0.413339 | 0.113965 | 0.121322 |
| O | O37 | 0.073958 | 0.616606 | 0.619852 |
| O | O38 | 0.409041 | 0.360602 | 0.132183 |
| O | O39 | 0.078344 | 0.861804 | 0.631930 |
| O | O40 | 0.584781 | 0.862200 | 0.854502 |
| O | O41 | 0.914267 | 0.366109 | 0.370045 |
| O | O42 | 0.579401 | 0.615991 | 0.885129 |
| O | O43 | 0.910023 | 0.116881 | 0.384629 |
| O | O44 | 0.381083 | 0.985424 | 0.128382 |
| O | O45 | 0.104885 | 0.487553 | 0.622532 |
| O | O46 | 0.409308 | 0.491240 | 0.100535 |
| O | O47 | 0.076521 | 0.992434 | 0.601168 |
| O | O48 | 0.596058 | 0.990307 | 0.898635 |
| O | O49 | 0.886835 | 0.495463 | 0.387213 |
| O | O50 | 0.581117 | 0.483532 | 0.909752 |
| O | O51 | 0.897486 | 0.985640 | 0.405456 |
| O | O52 | 0.311128 | 0.046450 | 0.461361 |
| O | O53 | 0.174624 | 0.546529 | 0.959199 |
| O | O54 | 0.316860 | 0.448367 | 0.449563 |
| O | O55 | 0.170304 | 0.949069 | 0.947700 |
| O | O56 | 0.669470 | 0.925395 | 0.547116 |
| O | O57 | 0.814628 | 0.425249 | 0.047042 |

|   |      |          |          |          |
|---|------|----------|----------|----------|
| 0 | 058  | 0.679111 | 0.531827 | 0.569024 |
| 0 | 059  | 0.808412 | 0.033050 | 0.060267 |
| 0 | 060  | 0.318742 | 0.943384 | 0.337381 |
| 0 | 061  | 0.170099 | 0.445180 | 0.830715 |
| 0 | 062  | 0.304437 | 0.546699 | 0.317900 |
| 0 | 063  | 0.185211 | 0.045316 | 0.812556 |
| 0 | 064  | 0.687416 | 0.041014 | 0.639923 |
| 0 | 065  | 0.823638 | 0.543334 | 0.133050 |
| 0 | 066  | 0.695531 | 0.435287 | 0.701802 |
| 0 | 067  | 0.800829 | 0.934630 | 0.191590 |
| 0 | 068  | 0.240022 | 0.045810 | 0.298417 |
| 0 | 069  | 0.246450 | 0.550273 | 0.797019 |
| 0 | 070  | 0.251774 | 0.429831 | 0.281652 |
| 0 | 071  | 0.233524 | 0.926022 | 0.778122 |
| 0 | 072  | 0.735737 | 0.929104 | 0.714229 |
| 0 | 073  | 0.749624 | 0.448394 | 0.212364 |
| 0 | 074  | 0.742060 | 0.556164 | 0.737315 |
| 0 | 075  | 0.743058 | 0.050365 | 0.228321 |
| 0 | 076  | 0.277854 | 0.123883 | 0.611573 |
| 0 | 077  | 0.210239 | 0.620185 | 0.112561 |
| 0 | 078  | 0.298375 | 0.371037 | 0.603981 |
| 0 | 079  | 0.188795 | 0.867614 | 0.097903 |
| 0 | 080  | 0.684202 | 0.869952 | 0.372684 |
| 0 | 081  | 0.788625 | 0.358208 | 0.885172 |
| 0 | 082  | 0.696018 | 0.625573 | 0.434833 |
| 0 | 083  | 0.789925 | 0.115862 | 0.911239 |
| 0 | 084  | 0.192568 | 0.035119 | 0.541386 |
| 0 | 085  | 0.293155 | 0.531270 | 0.038398 |
| 0 | 086  | 0.195488 | 0.427691 | 0.512266 |
| 0 | 087  | 0.290812 | 0.930375 | 0.013040 |
| 0 | 088  | 0.785694 | 0.930009 | 0.460335 |
| 0 | 089  | 0.699250 | 0.441545 | 0.958237 |
| 0 | 090  | 0.799069 | 0.556009 | 0.502892 |
| 0 | 091  | 0.687469 | 0.056521 | 0.998447 |
| 0 | 092  | 0.298263 | 0.995129 | 0.640408 |
| 0 | 093  | 0.187289 | 0.490415 | 0.134789 |
| 0 | 094  | 0.275291 | 0.500392 | 0.620038 |
| 0 | 095  | 0.206137 | 0.996932 | 0.123215 |
| 0 | 096  | 0.686845 | 0.001365 | 0.390372 |
| 0 | 097  | 0.808014 | 0.488285 | 0.875103 |
| 0 | 098  | 0.712240 | 0.498947 | 0.384796 |
| 0 | 099  | 0.766909 | 0.988077 | 0.884008 |
| 0 | 0100 | 0.103613 | 0.122569 | 0.604383 |
| 0 | 0101 | 0.379366 | 0.620940 | 0.103282 |

|   |      |          |          |          |
|---|------|----------|----------|----------|
| 0 | 0102 | 0.103042 | 0.355743 | 0.597829 |
| 0 | 0103 | 0.382925 | 0.854919 | 0.093754 |
| 0 | 0104 | 0.883922 | 0.852913 | 0.403859 |
| 0 | 0105 | 0.608426 | 0.353587 | 0.902412 |
| 0 | 0106 | 0.889920 | 0.627485 | 0.410232 |
| 0 | 0107 | 0.591482 | 0.122798 | 0.909461 |
| 0 | 0108 | 0.085098 | 0.060517 | 0.434492 |
| 0 | 0109 | 0.399909 | 0.559242 | 0.933084 |
| 0 | 0110 | 0.071794 | 0.434648 | 0.449557 |
| 0 | 0111 | 0.414748 | 0.939104 | 0.952042 |
| 0 | 0112 | 0.891354 | 0.917180 | 0.573375 |
| 0 | 0113 | 0.596469 | 0.414955 | 0.075099 |
| 0 | 0114 | 0.922623 | 0.548831 | 0.559709 |
| 0 | 0115 | 0.566035 | 0.050113 | 0.067349 |
| 0 | 0116 | 0.115657 | 0.048476 | 0.243125 |
| 0 | 0117 | 0.370407 | 0.538639 | 0.742087 |
| 0 | 0118 | 0.121126 | 0.421987 | 0.268237 |
| 0 | 0119 | 0.364677 | 0.924402 | 0.771693 |
| 0 | 0120 | 0.860985 | 0.952519 | 0.758697 |
| 0 | 0121 | 0.623963 | 0.449827 | 0.261276 |
| 0 | 0122 | 0.872386 | 0.559798 | 0.741778 |
| 0 | 0123 | 0.613588 | 0.058016 | 0.250912 |
| 0 | 0124 | 0.081712 | 0.942432 | 0.348255 |
| 0 | 0125 | 0.413809 | 0.439842 | 0.853951 |
| 0 | 0126 | 0.091645 | 0.541531 | 0.338355 |
| 0 | 0127 | 0.403631 | 0.043159 | 0.832414 |
| 0 | 0128 | 0.916877 | 0.038770 | 0.636473 |
| 0 | 0129 | 0.569795 | 0.537032 | 0.135059 |
| 0 | 0130 | 0.906578 | 0.441385 | 0.671940 |
| 0 | 0131 | 0.582377 | 0.940545 | 0.175864 |
| 0 | 0132 | 0.200226 | 0.126630 | 0.154003 |
| 0 | 0133 | 0.295963 | 0.627659 | 0.655116 |
| 0 | 0134 | 0.196530 | 0.357109 | 0.144295 |
| 0 | 0135 | 0.296798 | 0.862083 | 0.637042 |
| 0 | 0136 | 0.793663 | 0.861024 | 0.854761 |
| 0 | 0137 | 0.705512 | 0.369184 | 0.353686 |
| 0 | 0138 | 0.803698 | 0.621236 | 0.878453 |
| 0 | 0139 | 0.690113 | 0.131254 | 0.362597 |
| 0 | 0140 | 0.491672 | 0.847687 | 0.204315 |
| 0 | 0141 | 0.997986 | 0.350689 | 0.715740 |
| 0 | 0142 | 0.490059 | 0.629471 | 0.208534 |
| 0 | 0143 | 0.994435 | 0.132089 | 0.713383 |
| 0 | 0144 | 0.491828 | 0.135754 | 0.782572 |
| 0 | 0145 | 0.997042 | 0.628161 | 0.296004 |

|   |      |          |          |          |
|---|------|----------|----------|----------|
| 0 | 0146 | 0.499026 | 0.347684 | 0.793115 |
| 0 | 0147 | 0.992488 | 0.853383 | 0.292646 |
| 0 | 0148 | 0.376180 | 0.829312 | 0.286314 |
| 0 | 0149 | 0.115719 | 0.328209 | 0.789248 |
| 0 | 0150 | 0.376529 | 0.655361 | 0.294149 |
| 0 | 0151 | 0.109255 | 0.152332 | 0.796884 |
| 0 | 0152 | 0.611413 | 0.137097 | 0.715444 |
| 0 | 0153 | 0.884080 | 0.647214 | 0.213446 |
| 0 | 0154 | 0.613901 | 0.332193 | 0.707098 |
| 0 | 0155 | 0.878031 | 0.828529 | 0.209848 |
| 0 | 0156 | 0.423000 | 0.738788 | 0.159361 |
| 0 | 0157 | 0.063042 | 0.240064 | 0.665999 |
| 0 | 0158 | 0.569654 | 0.238549 | 0.828289 |
| 0 | 0159 | 0.930937 | 0.740267 | 0.335265 |
| 0 | 0160 | 0.305701 | 0.834844 | 0.446404 |
| 0 | 0161 | 0.182047 | 0.342568 | 0.952407 |
| 0 | 0162 | 0.310217 | 0.639729 | 0.460206 |
| 0 | 0163 | 0.178901 | 0.134025 | 0.959908 |
| 0 | 0164 | 0.681889 | 0.159506 | 0.556584 |
| 0 | 0165 | 0.804913 | 0.664424 | 0.065076 |
| 0 | 0166 | 0.684885 | 0.352656 | 0.546169 |
| 0 | 0167 | 0.807754 | 0.842241 | 0.047565 |
| 0 | 0168 | 0.246296 | 0.844076 | 0.271482 |
| 0 | 0169 | 0.245806 | 0.344461 | 0.780820 |
| 0 | 0170 | 0.245103 | 0.662104 | 0.294168 |
| 0 | 0171 | 0.239784 | 0.163650 | 0.792348 |
| 0 | 0172 | 0.740924 | 0.142807 | 0.731623 |
| 0 | 0173 | 0.756389 | 0.630979 | 0.242303 |
| 0 | 0174 | 0.743873 | 0.313739 | 0.711086 |
| 0 | 0175 | 0.747885 | 0.816423 | 0.217625 |
| 0 | 0176 | 0.271529 | 0.741929 | 0.573554 |
| 0 | 0177 | 0.216804 | 0.240042 | 0.064199 |
| 0 | 0178 | 0.717714 | 0.250636 | 0.427464 |
| 0 | 0179 | 0.770739 | 0.743954 | 0.920988 |
| 0 | 0180 | 0.188407 | 0.840660 | 0.530584 |
| 0 | 0181 | 0.301406 | 0.337798 | 0.027744 |
| 0 | 0182 | 0.190972 | 0.640000 | 0.539495 |
| 0 | 0183 | 0.300277 | 0.139787 | 0.028970 |
| 0 | 0184 | 0.797957 | 0.149256 | 0.470477 |
| 0 | 0185 | 0.690968 | 0.644912 | 0.973322 |
| 0 | 0186 | 0.805633 | 0.343446 | 0.475731 |
| 0 | 0187 | 0.688248 | 0.841214 | 0.971707 |
| 0 | 0188 | 0.108543 | 0.740267 | 0.580003 |
| 0 | 0189 | 0.381603 | 0.238067 | 0.080417 |

|    |       |          |          |          |
|----|-------|----------|----------|----------|
| O  | O190  | 0.885879 | 0.243679 | 0.424201 |
| O  | O191  | 0.606386 | 0.742018 | 0.925034 |
| O  | O192  | 0.073389 | 0.827014 | 0.441118 |
| O  | O193  | 0.417441 | 0.323244 | 0.941506 |
| O  | O194  | 0.083381 | 0.657503 | 0.433424 |
| O  | O195  | 0.413019 | 0.155555 | 0.934591 |
| O  | O196  | 0.908326 | 0.161821 | 0.572369 |
| O  | O197  | 0.578196 | 0.660606 | 0.071897 |
| O  | O198  | 0.922315 | 0.333398 | 0.559528 |
| O  | O199  | 0.567574 | 0.841406 | 0.045584 |
| O  | O200  | 0.117651 | 0.831499 | 0.255024 |
| O  | O201  | 0.373594 | 0.332557 | 0.754955 |
| O  | O202  | 0.119178 | 0.653815 | 0.244380 |
| O  | O203  | 0.366545 | 0.155833 | 0.749382 |
| O  | O204  | 0.869093 | 0.131581 | 0.756899 |
| O  | O205  | 0.615496 | 0.630644 | 0.257257 |
| O  | O206  | 0.872407 | 0.323849 | 0.741286 |
| O  | O207  | 0.617897 | 0.817806 | 0.222974 |
| O  | O208  | 0.195341 | 0.745542 | 0.163215 |
| O  | O209  | 0.292839 | 0.248122 | 0.665606 |
| O  | O210  | 0.804385 | 0.233666 | 0.836622 |
| O  | O211  | 0.684986 | 0.740160 | 0.345418 |
| O  | O212  | 0.739244 | 0.747662 | 0.557934 |
| Al | Al213 | 0.688760 | 0.654790 | 0.309771 |
| Si | Si214 | 0.413764 | 0.047152 | 0.189016 |
| Si | Si215 | 0.073193 | 0.548781 | 0.685436 |
| Si | Si216 | 0.424983 | 0.432797 | 0.180724 |
| Si | Si217 | 0.061469 | 0.933565 | 0.680858 |
| Si | Si218 | 0.569188 | 0.937584 | 0.816786 |
| Si | Si219 | 0.919696 | 0.438429 | 0.316718 |
| Si | Si220 | 0.567572 | 0.544274 | 0.832954 |
| Si | Si221 | 0.917878 | 0.045256 | 0.329791 |
| Si | Si222 | 0.309916 | 0.023448 | 0.346239 |
| Si | Si223 | 0.177006 | 0.525222 | 0.843392 |
| Si | Si224 | 0.313913 | 0.466876 | 0.332567 |
| Si | Si225 | 0.173384 | 0.965958 | 0.830342 |
| Si | Si226 | 0.674398 | 0.961900 | 0.654226 |
| Si | Si227 | 0.816992 | 0.464030 | 0.152544 |
| Si | Si228 | 0.682639 | 0.514682 | 0.686004 |
| Si | Si229 | 0.806351 | 0.015039 | 0.177636 |
| Si | Si230 | 0.269676 | 0.050272 | 0.563838 |
| Si | Si231 | 0.216430 | 0.547340 | 0.061653 |
| Si | Si232 | 0.271611 | 0.436582 | 0.546901 |
| Si | Si233 | 0.214072 | 0.935795 | 0.046094 |

|    |       |          |          |          |
|----|-------|----------|----------|----------|
| Si | Si234 | 0.707152 | 0.931417 | 0.441224 |
| Si | Si235 | 0.777246 | 0.428343 | 0.941236 |
| Si | Si236 | 0.721366 | 0.553262 | 0.472111 |
| Si | Si237 | 0.763494 | 0.048514 | 0.963614 |
| Si | Si238 | 0.114775 | 0.052827 | 0.545581 |
| Si | Si239 | 0.370501 | 0.550917 | 0.044350 |
| Si | Si240 | 0.118886 | 0.426811 | 0.545855 |
| Si | Si241 | 0.367263 | 0.927635 | 0.046903 |
| Si | Si242 | 0.864614 | 0.921859 | 0.459980 |
| Si | Si243 | 0.621637 | 0.423120 | 0.961505 |
| Si | Si244 | 0.874601 | 0.556533 | 0.464050 |
| Si | Si245 | 0.610358 | 0.054937 | 0.967842 |
| Si | Si246 | 0.068776 | 0.021669 | 0.331378 |
| Si | Si247 | 0.419106 | 0.519257 | 0.832121 |
| Si | Si248 | 0.070057 | 0.463353 | 0.336725 |
| Si | Si249 | 0.418594 | 0.963799 | 0.837441 |
| Si | Si250 | 0.913449 | 0.960926 | 0.669489 |
| Si | Si251 | 0.573257 | 0.459709 | 0.170141 |
| Si | Si252 | 0.924752 | 0.520307 | 0.672922 |
| Si | Si253 | 0.562774 | 0.019243 | 0.178896 |
| Si | Si254 | 0.190681 | 0.054049 | 0.204698 |
| Si | Si255 | 0.296867 | 0.553798 | 0.703955 |
| Si | Si256 | 0.189500 | 0.425514 | 0.206895 |
| Si | Si257 | 0.297901 | 0.927556 | 0.706713 |
| Si | Si258 | 0.789681 | 0.933548 | 0.802680 |
| Si | Si259 | 0.697889 | 0.441992 | 0.302767 |
| Si | Si260 | 0.806430 | 0.555620 | 0.808964 |
| Si | Si261 | 0.683678 | 0.059767 | 0.307523 |
| Si | Si262 | 0.418728 | 0.817264 | 0.186015 |
| Si | Si263 | 0.069639 | 0.318539 | 0.692253 |
| Si | Si264 | 0.418032 | 0.660940 | 0.191019 |
| Si | Si265 | 0.067494 | 0.161910 | 0.694944 |
| Si | Si266 | 0.566137 | 0.159167 | 0.808757 |
| Si | Si267 | 0.925236 | 0.661004 | 0.313272 |
| Si | Si268 | 0.572453 | 0.317956 | 0.808261 |
| Si | Si269 | 0.921450 | 0.818471 | 0.309956 |
| Si | Si270 | 0.311381 | 0.863134 | 0.334693 |
| Si | Si271 | 0.178730 | 0.365210 | 0.837731 |
| Si | Si272 | 0.309397 | 0.625826 | 0.341654 |
| Si | Si273 | 0.178017 | 0.123788 | 0.840599 |
| Si | Si274 | 0.680367 | 0.120270 | 0.661456 |
| Si | Si275 | 0.815215 | 0.621151 | 0.165979 |
| Si | Si276 | 0.684256 | 0.358486 | 0.666115 |
| Si | Si277 | 0.808630 | 0.855651 | 0.166234 |



|    |       |          |          |          |
|----|-------|----------|----------|----------|
| Si | Si278 | 0.265180 | 0.819994 | 0.546949 |
| Si | Si279 | 0.224558 | 0.319229 | 0.047453 |
| Si | Si280 | 0.267167 | 0.662588 | 0.555991 |
| Si | Si281 | 0.224155 | 0.160571 | 0.051274 |
| Si | Si282 | 0.721897 | 0.172360 | 0.454159 |
| Si | Si283 | 0.767398 | 0.667584 | 0.960063 |
| Si | Si284 | 0.728414 | 0.328825 | 0.451238 |
| Si | Si285 | 0.764962 | 0.821841 | 0.950527 |
| Si | Si286 | 0.112146 | 0.817660 | 0.545544 |
| Si | Si287 | 0.377558 | 0.315395 | 0.045274 |
| Si | Si288 | 0.114390 | 0.663413 | 0.543504 |
| Si | Si289 | 0.377035 | 0.161676 | 0.041527 |
| Si | Si290 | 0.875739 | 0.167574 | 0.462468 |
| Si | Si291 | 0.613569 | 0.665532 | 0.964688 |
| Si | Si292 | 0.881868 | 0.321561 | 0.457284 |
| Si | Si293 | 0.611738 | 0.821019 | 0.949978 |
| Si | Si294 | 0.066692 | 0.863556 | 0.333925 |
| Si | Si295 | 0.425648 | 0.360928 | 0.835466 |
| Si | Si296 | 0.072959 | 0.620017 | 0.328136 |
| Si | Si297 | 0.418556 | 0.122419 | 0.825017 |
| Si | Si298 | 0.921803 | 0.116424 | 0.670099 |
| Si | Si299 | 0.564940 | 0.614896 | 0.170750 |
| Si | Si300 | 0.924663 | 0.362500 | 0.671916 |
| Si | Si301 | 0.564912 | 0.861888 | 0.162268 |
| Si | Si302 | 0.187132 | 0.822495 | 0.197584 |
| Si | Si303 | 0.302590 | 0.324518 | 0.701830 |
| Si | Si304 | 0.192500 | 0.669525 | 0.203598 |
| Si | Si305 | 0.294412 | 0.171874 | 0.704809 |
| Si | Si306 | 0.801081 | 0.155624 | 0.808058 |
| Si | Si307 | 0.802381 | 0.308674 | 0.793343 |
| Si | Si308 | 0.684000 | 0.811357 | 0.289921 |
| Zn | Zn309 | 0.645414 | 0.714632 | 0.500114 |

**TS-C<sub>6</sub>H<sub>11</sub>ZnOH<sub>2</sub>-HTransfer-Concerted-ZnOH<sup>+</sup> (Fig. 9b/TS2 in Black)**

Total energy = -1960.04143314 eV

data\_

```

_audit_creation_method    'Materials Studio'
_cell_length_a            20.357621
_cell_length_b            20.050598
_cell_length_c            13.476578
_cell_angle_alpha         90.000000
_cell_angle_beta          90.000000
_cell_angle_gamma         90.000000

```

\_symmetry\_space\_group\_name\_H-M 'P1'

loop\_

\_atom\_site\_type\_symbol

\_atom\_site\_label

\_atom\_site\_fract\_x

\_atom\_site\_fract\_y

\_atom\_site\_fract\_z

|   |     |          |          |          |
|---|-----|----------|----------|----------|
| H | H1  | 0.747631 | 0.758543 | 0.609738 |
| H | H2  | 0.659107 | 0.768752 | 0.653578 |
| H | H3  | 0.538673 | 0.647622 | 0.433961 |
| H | H4  | 0.475695 | 0.706881 | 0.434112 |
| H | H5  | 0.565609 | 0.779551 | 0.442297 |
| H | H6  | 0.556338 | 0.833473 | 0.592162 |
| H | H7  | 0.620429 | 0.787446 | 0.656954 |
| H | H8  | 0.497719 | 0.790532 | 0.729182 |
| H | H9  | 0.545583 | 0.717914 | 0.727388 |
| H | H10 | 0.422558 | 0.739479 | 0.601514 |
| H | H11 | 0.431502 | 0.685875 | 0.704321 |
| H | H12 | 0.445367 | 0.619934 | 0.548678 |
| H | H13 | 0.521074 | 0.623790 | 0.611381 |
| C | C14 | 0.515423 | 0.685985 | 0.479865 |
| C | C15 | 0.563396 | 0.744016 | 0.503950 |
| C | C16 | 0.555583 | 0.779222 | 0.596909 |
| C | C17 | 0.515028 | 0.750171 | 0.681145 |
| C | C18 | 0.457843 | 0.707838 | 0.641439 |
| C | C19 | 0.484548 | 0.654058 | 0.571804 |
| O | O20 | 0.487941 | 0.030668 | 0.212129 |
| O | O21 | 0.994898 | 0.532238 | 0.708267 |
| O | O22 | 0.499114 | 0.443504 | 0.205673 |
| O | O23 | 0.986890 | 0.943425 | 0.707668 |
| O | O24 | 0.493529 | 0.957980 | 0.791658 |
| O | O25 | 0.991369 | 0.459387 | 0.290943 |
| O | O26 | 0.486994 | 0.543781 | 0.792132 |
| O | O27 | 0.996941 | 0.044848 | 0.293207 |
| O | O28 | 0.370994 | 0.059977 | 0.284040 |
| O | O29 | 0.110913 | 0.557966 | 0.785526 |
| O | O30 | 0.377117 | 0.454568 | 0.267766 |
| O | O31 | 0.108820 | 0.957821 | 0.767062 |
| O | O32 | 0.610369 | 0.934009 | 0.716824 |
| O | O33 | 0.876601 | 0.431275 | 0.210590 |
| O | O34 | 0.608290 | 0.536597 | 0.729052 |
| O | O35 | 0.873271 | 0.035318 | 0.239154 |
| O | O36 | 0.411559 | 0.116072 | 0.116646 |
| O | O37 | 0.074517 | 0.617980 | 0.619277 |

|   |     |          |          |          |
|---|-----|----------|----------|----------|
| 0 | 038 | 0.408928 | 0.365621 | 0.129008 |
| 0 | 039 | 0.078839 | 0.866742 | 0.630845 |
| 0 | 040 | 0.572617 | 0.872735 | 0.881629 |
| 0 | 041 | 0.913505 | 0.368981 | 0.373998 |
| 0 | 042 | 0.575534 | 0.625203 | 0.866057 |
| 0 | 043 | 0.908943 | 0.121077 | 0.380359 |
| 0 | 044 | 0.378577 | 0.987230 | 0.122722 |
| 0 | 045 | 0.104983 | 0.488693 | 0.620240 |
| 0 | 046 | 0.409633 | 0.495361 | 0.086058 |
| 0 | 047 | 0.073844 | 0.995947 | 0.584910 |
| 0 | 048 | 0.602167 | 0.002372 | 0.882683 |
| 0 | 049 | 0.879737 | 0.496919 | 0.380067 |
| 0 | 050 | 0.578095 | 0.495211 | 0.911557 |
| 0 | 051 | 0.912037 | 0.990467 | 0.416073 |
| 0 | 052 | 0.305671 | 0.062873 | 0.451151 |
| 0 | 053 | 0.177110 | 0.564636 | 0.951966 |
| 0 | 054 | 0.309484 | 0.447616 | 0.432668 |
| 0 | 055 | 0.176014 | 0.944675 | 0.931594 |
| 0 | 056 | 0.678977 | 0.926823 | 0.553238 |
| 0 | 057 | 0.810062 | 0.423764 | 0.044503 |
| 0 | 058 | 0.677639 | 0.535089 | 0.567560 |
| 0 | 059 | 0.808113 | 0.045999 | 0.072116 |
| 0 | 060 | 0.320794 | 0.947447 | 0.356913 |
| 0 | 061 | 0.165685 | 0.448091 | 0.860061 |
| 0 | 062 | 0.294607 | 0.552494 | 0.315408 |
| 0 | 063 | 0.194725 | 0.051366 | 0.818862 |
| 0 | 064 | 0.664782 | 0.044129 | 0.642096 |
| 0 | 065 | 0.826172 | 0.541404 | 0.130431 |
| 0 | 066 | 0.690517 | 0.436057 | 0.695923 |
| 0 | 067 | 0.790891 | 0.938902 | 0.184551 |
| 0 | 068 | 0.241174 | 0.039961 | 0.284676 |
| 0 | 069 | 0.241281 | 0.543033 | 0.784890 |
| 0 | 070 | 0.247964 | 0.435801 | 0.260035 |
| 0 | 071 | 0.237169 | 0.933855 | 0.758704 |
| 0 | 072 | 0.740840 | 0.950906 | 0.720890 |
| 0 | 073 | 0.746706 | 0.450539 | 0.210171 |
| 0 | 074 | 0.737578 | 0.554802 | 0.740162 |
| 0 | 075 | 0.744343 | 0.055280 | 0.242403 |
| 0 | 076 | 0.276442 | 0.130972 | 0.612485 |
| 0 | 077 | 0.211672 | 0.631033 | 0.112875 |
| 0 | 078 | 0.304324 | 0.375695 | 0.592232 |
| 0 | 079 | 0.179397 | 0.875475 | 0.093971 |
| 0 | 080 | 0.706012 | 0.865955 | 0.386759 |
| 0 | 081 | 0.778152 | 0.360325 | 0.880990 |

|   |      |          |          |          |
|---|------|----------|----------|----------|
| 0 | 082  | 0.684338 | 0.622443 | 0.425677 |
| 0 | 083  | 0.797162 | 0.117298 | 0.912012 |
| 0 | 084  | 0.193536 | 0.038633 | 0.545772 |
| 0 | 085  | 0.290359 | 0.536882 | 0.040863 |
| 0 | 086  | 0.192642 | 0.423216 | 0.511334 |
| 0 | 087  | 0.291981 | 0.920995 | 0.013318 |
| 0 | 088  | 0.791022 | 0.953397 | 0.457869 |
| 0 | 089  | 0.696346 | 0.450511 | 0.955725 |
| 0 | 090  | 0.794896 | 0.563286 | 0.492920 |
| 0 | 091  | 0.689724 | 0.064253 | 0.995148 |
| 0 | 092  | 0.306463 | 0.002378 | 0.625270 |
| 0 | 093  | 0.178290 | 0.503122 | 0.125468 |
| 0 | 094  | 0.274052 | 0.504345 | 0.602554 |
| 0 | 095  | 0.210044 | 0.004033 | 0.100296 |
| 0 | 096  | 0.676983 | 0.995301 | 0.386114 |
| 0 | 097  | 0.808463 | 0.489091 | 0.874014 |
| 0 | 098  | 0.709435 | 0.495289 | 0.386678 |
| 0 | 099  | 0.775275 | 0.987143 | 0.903020 |
| 0 | 0100 | 0.101673 | 0.126185 | 0.595615 |
| 0 | 0101 | 0.379110 | 0.625086 | 0.098917 |
| 0 | 0102 | 0.090542 | 0.359063 | 0.586437 |
| 0 | 0103 | 0.397304 | 0.858916 | 0.082286 |
| 0 | 0104 | 0.879554 | 0.861707 | 0.405262 |
| 0 | 0105 | 0.605164 | 0.365309 | 0.894954 |
| 0 | 0106 | 0.893745 | 0.627238 | 0.405508 |
| 0 | 0107 | 0.589809 | 0.131759 | 0.916917 |
| 0 | 0108 | 0.094765 | 0.065739 | 0.421614 |
| 0 | 0109 | 0.391662 | 0.566688 | 0.923629 |
| 0 | 0110 | 0.072045 | 0.444183 | 0.441642 |
| 0 | 0111 | 0.411401 | 0.947984 | 0.941892 |
| 0 | 0112 | 0.889019 | 0.921549 | 0.579893 |
| 0 | 0113 | 0.593440 | 0.421119 | 0.071418 |
| 0 | 0114 | 0.916656 | 0.545597 | 0.554814 |
| 0 | 0115 | 0.568174 | 0.046508 | 0.061201 |
| 0 | 0116 | 0.117295 | 0.038564 | 0.229993 |
| 0 | 0117 | 0.366079 | 0.537495 | 0.733399 |
| 0 | 0118 | 0.116788 | 0.429863 | 0.257770 |
| 0 | 0119 | 0.368523 | 0.929161 | 0.757858 |
| 0 | 0120 | 0.866068 | 0.953425 | 0.769742 |
| 0 | 0121 | 0.621130 | 0.450606 | 0.259869 |
| 0 | 0122 | 0.868776 | 0.561049 | 0.737852 |
| 0 | 0123 | 0.613221 | 0.060175 | 0.245543 |
| 0 | 0124 | 0.074947 | 0.944892 | 0.352317 |
| 0 | 0125 | 0.409477 | 0.444876 | 0.856273 |

|   |      |          |          |          |
|---|------|----------|----------|----------|
| 0 | 0126 | 0.084802 | 0.549550 | 0.325427 |
| 0 | 0127 | 0.400752 | 0.050074 | 0.818869 |
| 0 | 0128 | 0.911354 | 0.043553 | 0.643500 |
| 0 | 0129 | 0.573653 | 0.542710 | 0.137019 |
| 0 | 0130 | 0.902495 | 0.441190 | 0.674345 |
| 0 | 0131 | 0.581350 | 0.940800 | 0.176974 |
| 0 | 0132 | 0.196851 | 0.128484 | 0.153340 |
| 0 | 0133 | 0.290540 | 0.628956 | 0.654028 |
| 0 | 0134 | 0.186387 | 0.370210 | 0.119292 |
| 0 | 0135 | 0.301299 | 0.869418 | 0.618546 |
| 0 | 0136 | 0.788573 | 0.862588 | 0.848599 |
| 0 | 0137 | 0.701976 | 0.366998 | 0.346810 |
| 0 | 0138 | 0.800830 | 0.622074 | 0.877305 |
| 0 | 0139 | 0.682353 | 0.127723 | 0.375876 |
| 0 | 0140 | 0.492686 | 0.846243 | 0.216659 |
| 0 | 0141 | 0.992134 | 0.347944 | 0.716585 |
| 0 | 0142 | 0.489540 | 0.632715 | 0.204309 |
| 0 | 0143 | 0.995127 | 0.135224 | 0.709141 |
| 0 | 0144 | 0.492345 | 0.141917 | 0.784527 |
| 0 | 0145 | 0.996734 | 0.644622 | 0.285663 |
| 0 | 0146 | 0.494709 | 0.355266 | 0.789036 |
| 0 | 0147 | 0.988597 | 0.853408 | 0.295064 |
| 0 | 0148 | 0.370039 | 0.838152 | 0.272935 |
| 0 | 0149 | 0.113122 | 0.339475 | 0.778795 |
| 0 | 0150 | 0.376924 | 0.654047 | 0.292656 |
| 0 | 0151 | 0.111580 | 0.151525 | 0.789756 |
| 0 | 0152 | 0.614210 | 0.152442 | 0.725387 |
| 0 | 0153 | 0.880693 | 0.649517 | 0.209410 |
| 0 | 0154 | 0.608935 | 0.333091 | 0.703088 |
| 0 | 0155 | 0.873742 | 0.838347 | 0.210382 |
| 0 | 0156 | 0.420345 | 0.741874 | 0.160709 |
| 0 | 0157 | 0.065317 | 0.242860 | 0.664915 |
| 0 | 0158 | 0.563294 | 0.247745 | 0.837989 |
| 0 | 0159 | 0.917354 | 0.745473 | 0.335253 |
| 0 | 0160 | 0.299449 | 0.827702 | 0.432296 |
| 0 | 0161 | 0.188270 | 0.327834 | 0.933038 |
| 0 | 0162 | 0.310065 | 0.643741 | 0.459798 |
| 0 | 0163 | 0.176648 | 0.144835 | 0.959077 |
| 0 | 0164 | 0.684653 | 0.163731 | 0.565395 |
| 0 | 0165 | 0.796829 | 0.661806 | 0.064900 |
| 0 | 0166 | 0.679057 | 0.353261 | 0.539869 |
| 0 | 0167 | 0.807014 | 0.845968 | 0.042777 |
| 0 | 0168 | 0.241782 | 0.863824 | 0.263608 |
| 0 | 0169 | 0.240839 | 0.364121 | 0.760585 |

|    |       |          |          |          |
|----|-------|----------|----------|----------|
| 0  | 0170  | 0.246990 | 0.673001 | 0.294506 |
| 0  | 0171  | 0.241718 | 0.171547 | 0.794678 |
| 0  | 0172  | 0.742750 | 0.128789 | 0.734787 |
| 0  | 0173  | 0.755539 | 0.622902 | 0.243778 |
| 0  | 0174  | 0.739328 | 0.315393 | 0.703201 |
| 0  | 0175  | 0.743728 | 0.818565 | 0.208811 |
| 0  | 0176  | 0.271800 | 0.745100 | 0.576492 |
| 0  | 0177  | 0.215267 | 0.245263 | 0.077757 |
| 0  | 0178  | 0.715031 | 0.249834 | 0.426029 |
| 0  | 0179  | 0.769156 | 0.745654 | 0.922545 |
| 0  | 0180  | 0.187351 | 0.841840 | 0.529541 |
| 0  | 0181  | 0.300042 | 0.341008 | 0.029845 |
| 0  | 0182  | 0.189127 | 0.645755 | 0.532398 |
| 0  | 0183  | 0.297498 | 0.146032 | 0.030169 |
| 0  | 0184  | 0.796366 | 0.149327 | 0.467988 |
| 0  | 0185  | 0.685549 | 0.647867 | 0.964703 |
| 0  | 0186  | 0.800966 | 0.345767 | 0.471517 |
| 0  | 0187  | 0.686749 | 0.844886 | 0.969555 |
| 0  | 0188  | 0.105700 | 0.742962 | 0.581195 |
| 0  | 0189  | 0.382250 | 0.241746 | 0.079306 |
| 0  | 0190  | 0.881452 | 0.246266 | 0.421716 |
| 0  | 0191  | 0.603516 | 0.748016 | 0.918962 |
| 0  | 0192  | 0.071488 | 0.828419 | 0.441500 |
| 0  | 0193  | 0.415056 | 0.326767 | 0.939119 |
| 0  | 0194  | 0.078664 | 0.660319 | 0.433446 |
| 0  | 0195  | 0.408812 | 0.158729 | 0.931375 |
| 0  | 0196  | 0.908071 | 0.164058 | 0.568189 |
| 0  | 0197  | 0.569311 | 0.661180 | 0.055613 |
| 0  | 0198  | 0.915053 | 0.332828 | 0.562230 |
| 0  | 0199  | 0.575199 | 0.830723 | 0.067508 |
| 0  | 0200  | 0.114246 | 0.836608 | 0.255346 |
| 0  | 0201  | 0.368647 | 0.338595 | 0.755352 |
| 0  | 0202  | 0.121095 | 0.664171 | 0.246637 |
| 0  | 0203  | 0.367839 | 0.166795 | 0.744039 |
| 0  | 0204  | 0.870857 | 0.144855 | 0.755422 |
| 0  | 0205  | 0.615907 | 0.648242 | 0.239402 |
| 0  | 0206  | 0.866574 | 0.324026 | 0.745220 |
| 0  | 0207  | 0.617364 | 0.826242 | 0.255041 |
| 0  | 0208  | 0.197667 | 0.756045 | 0.165199 |
| 0  | 0209  | 0.287532 | 0.256290 | 0.664670 |
| 0  | 0210  | 0.790900 | 0.234747 | 0.833256 |
| 0  | 0211  | 0.695196 | 0.739715 | 0.347399 |
| 0  | 0212  | 0.711269 | 0.727622 | 0.615040 |
| Al | Al213 | 0.688517 | 0.656345 | 0.302645 |

|    |       |          |          |          |
|----|-------|----------|----------|----------|
| Si | Si214 | 0.412735 | 0.048638 | 0.182842 |
| Si | Si215 | 0.070771 | 0.549179 | 0.682296 |
| Si | Si216 | 0.423052 | 0.439838 | 0.171969 |
| Si | Si217 | 0.062837 | 0.940881 | 0.672307 |
| Si | Si218 | 0.569329 | 0.941885 | 0.819674 |
| Si | Si219 | 0.915781 | 0.439308 | 0.314534 |
| Si | Si220 | 0.563048 | 0.550017 | 0.825850 |
| Si | Si221 | 0.921867 | 0.048196 | 0.332285 |
| Si | Si222 | 0.309550 | 0.027265 | 0.343423 |
| Si | Si223 | 0.173713 | 0.528125 | 0.844766 |
| Si | Si224 | 0.307349 | 0.472488 | 0.318718 |
| Si | Si225 | 0.179140 | 0.971887 | 0.818901 |
| Si | Si226 | 0.673823 | 0.964599 | 0.659555 |
| Si | Si227 | 0.814786 | 0.462486 | 0.150053 |
| Si | Si228 | 0.679011 | 0.515876 | 0.683561 |
| Si | Si229 | 0.804303 | 0.018796 | 0.184905 |
| Si | Si230 | 0.270438 | 0.059067 | 0.558788 |
| Si | Si231 | 0.214320 | 0.559268 | 0.058077 |
| Si | Si232 | 0.269726 | 0.437559 | 0.535280 |
| Si | Si233 | 0.214721 | 0.936182 | 0.035486 |
| Si | Si234 | 0.713458 | 0.935612 | 0.445269 |
| Si | Si235 | 0.773172 | 0.430912 | 0.938508 |
| Si | Si236 | 0.717208 | 0.554023 | 0.467591 |
| Si | Si237 | 0.767268 | 0.053728 | 0.969929 |
| Si | Si238 | 0.115960 | 0.056945 | 0.537035 |
| Si | Si239 | 0.367878 | 0.556310 | 0.037839 |
| Si | Si240 | 0.115344 | 0.429166 | 0.539751 |
| Si | Si241 | 0.369362 | 0.929057 | 0.039825 |
| Si | Si242 | 0.867886 | 0.931369 | 0.464417 |
| Si | Si243 | 0.618540 | 0.432766 | 0.958408 |
| Si | Si244 | 0.870992 | 0.558305 | 0.457812 |
| Si | Si245 | 0.612783 | 0.061182 | 0.964242 |
| Si | Si246 | 0.070765 | 0.023546 | 0.324686 |
| Si | Si247 | 0.413746 | 0.523247 | 0.826979 |
| Si | Si248 | 0.066192 | 0.470760 | 0.328160 |
| Si | Si249 | 0.418556 | 0.971393 | 0.827217 |
| Si | Si250 | 0.913496 | 0.965406 | 0.675078 |
| Si | Si251 | 0.571854 | 0.464888 | 0.168349 |
| Si | Si252 | 0.920425 | 0.520196 | 0.669310 |
| Si | Si253 | 0.562837 | 0.019579 | 0.174667 |
| Si | Si254 | 0.191529 | 0.052265 | 0.192591 |
| Si | Si255 | 0.292574 | 0.552773 | 0.694448 |
| Si | Si256 | 0.182710 | 0.435048 | 0.190576 |
| Si | Si257 | 0.302788 | 0.934177 | 0.690060 |

|    |       |          |          |          |
|----|-------|----------|----------|----------|
| Si | Si258 | 0.792684 | 0.939049 | 0.810314 |
| Si | Si259 | 0.695189 | 0.441345 | 0.300319 |
| Si | Si260 | 0.803778 | 0.556565 | 0.807502 |
| Si | Si261 | 0.679536 | 0.059363 | 0.312188 |
| Si | Si262 | 0.420075 | 0.820922 | 0.183229 |
| Si | Si263 | 0.065166 | 0.322150 | 0.686688 |
| Si | Si264 | 0.417069 | 0.663432 | 0.188846 |
| Si | Si265 | 0.068439 | 0.164163 | 0.689930 |
| Si | Si266 | 0.564808 | 0.168587 | 0.816163 |
| Si | Si267 | 0.921629 | 0.666664 | 0.308691 |
| Si | Si268 | 0.567960 | 0.325397 | 0.806335 |
| Si | Si269 | 0.914989 | 0.824334 | 0.311595 |
| Si | Si270 | 0.307829 | 0.869581 | 0.330582 |
| Si | Si271 | 0.177149 | 0.370222 | 0.832575 |
| Si | Si272 | 0.307697 | 0.630552 | 0.340850 |
| Si | Si273 | 0.180468 | 0.129752 | 0.840860 |
| Si | Si274 | 0.676909 | 0.122340 | 0.667535 |
| Si | Si275 | 0.813186 | 0.618564 | 0.163803 |
| Si | Si276 | 0.678810 | 0.359606 | 0.659923 |
| Si | Si277 | 0.804429 | 0.860519 | 0.161127 |
| Si | Si278 | 0.264533 | 0.821423 | 0.539782 |
| Si | Si279 | 0.222645 | 0.321626 | 0.040881 |
| Si | Si280 | 0.265261 | 0.666115 | 0.554413 |
| Si | Si281 | 0.221478 | 0.166495 | 0.054029 |
| Si | Si282 | 0.719797 | 0.172479 | 0.458320 |
| Si | Si283 | 0.763022 | 0.668549 | 0.957220 |
| Si | Si284 | 0.724205 | 0.328748 | 0.446778 |
| Si | Si285 | 0.762964 | 0.824083 | 0.947153 |
| Si | Si286 | 0.110793 | 0.820146 | 0.545591 |
| Si | Si287 | 0.376599 | 0.319078 | 0.044268 |
| Si | Si288 | 0.111972 | 0.666555 | 0.541925 |
| Si | Si289 | 0.374910 | 0.165624 | 0.039616 |
| Si | Si290 | 0.873697 | 0.169886 | 0.459643 |
| Si | Si291 | 0.608931 | 0.670169 | 0.952541 |
| Si | Si292 | 0.877531 | 0.323641 | 0.457102 |
| Si | Si293 | 0.609722 | 0.823925 | 0.959608 |
| Si | Si294 | 0.062491 | 0.865929 | 0.335562 |
| Si | Si295 | 0.421753 | 0.366397 | 0.834497 |
| Si | Si296 | 0.070383 | 0.629199 | 0.323088 |
| Si | Si297 | 0.417280 | 0.129320 | 0.820047 |
| Si | Si298 | 0.921196 | 0.121968 | 0.669207 |
| Si | Si299 | 0.563704 | 0.621699 | 0.161343 |
| Si | Si300 | 0.918807 | 0.361936 | 0.674429 |
| Si | Si301 | 0.566814 | 0.861100 | 0.178386 |



|    |       |          |          |          |
|----|-------|----------|----------|----------|
| Si | Si302 | 0.183208 | 0.832707 | 0.195703 |
| Si | Si303 | 0.300356 | 0.333450 | 0.694400 |
| Si | Si304 | 0.193915 | 0.679861 | 0.204636 |
| Si | Si305 | 0.293828 | 0.180289 | 0.703903 |
| Si | Si306 | 0.800267 | 0.156705 | 0.807558 |
| Si | Si307 | 0.794248 | 0.310044 | 0.790783 |
| Si | Si308 | 0.690579 | 0.813185 | 0.298730 |
| Zn | Zn309 | 0.659357 | 0.711726 | 0.497030 |

**C<sub>6</sub>H<sub>10</sub>-Phys.Ads-H<sub>2</sub>-Phys.Ads-ZnOH<sup>+</sup> (Fig. 9b/M3 in Black)**

Total energy = -1961.63677156 eV

data\_

\_audit\_creation\_method 'Materials Studio'

\_cell\_length\_a 20.357621

\_cell\_length\_b 20.050598

\_cell\_length\_c 13.476578

\_cell\_angle\_alpha 90.000000

\_cell\_angle\_beta 90.000000

\_cell\_angle\_gamma 90.000000

\_symmetry\_space\_group\_name\_H-M 'P1'

loop\_

\_atom\_site\_type\_symbol

\_atom\_site\_label

\_atom\_site\_fract\_x

\_atom\_site\_fract\_y

\_atom\_site\_fract\_z

|   |     |          |          |          |
|---|-----|----------|----------|----------|
| H | H1  | 0.768861 | 0.759786 | 0.613412 |
| H | H2  | 0.575346 | 0.828017 | 0.415398 |
| H | H3  | 0.496858 | 0.795759 | 0.435079 |
| H | H4  | 0.597192 | 0.836796 | 0.593104 |
| H | H5  | 0.518463 | 0.870629 | 0.573208 |
| H | H6  | 0.515965 | 0.794165 | 0.719292 |
| H | H7  | 0.468133 | 0.760496 | 0.622485 |
| H | H8  | 0.605320 | 0.717235 | 0.689854 |
| H | H9  | 0.533972 | 0.668696 | 0.682583 |
| H | H10 | 0.591819 | 0.634028 | 0.534043 |
| H | H11 | 0.577899 | 0.702922 | 0.387804 |
| H | H12 | 0.513763 | 0.560856 | 0.409940 |
| H | H13 | 0.524230 | 0.525976 | 0.418033 |
| C | C14 | 0.546998 | 0.796006 | 0.465540 |
| C | C15 | 0.546830 | 0.824202 | 0.571313 |
| C | C16 | 0.518639 | 0.773156 | 0.644465 |
| C | C17 | 0.560535 | 0.709435 | 0.646025 |

|   |     |          |          |          |
|---|-----|----------|----------|----------|
| C | C18 | 0.578507 | 0.686333 | 0.543120 |
| C | C19 | 0.571832 | 0.725270 | 0.460908 |
| O | O20 | 0.522873 | 0.038358 | 0.219334 |
| O | O21 | 0.018906 | 0.548656 | 0.716511 |
| O | O22 | 0.527320 | 0.439235 | 0.216978 |
| O | O23 | 0.015717 | 0.935526 | 0.708293 |
| O | O24 | 0.517747 | 0.949170 | 0.789615 |
| O | O25 | 0.023453 | 0.457202 | 0.295784 |
| O | O26 | 0.516384 | 0.541790 | 0.793238 |
| O | O27 | 0.021821 | 0.035837 | 0.298066 |
| O | O28 | 0.404269 | 0.059205 | 0.292179 |
| O | O29 | 0.134359 | 0.553004 | 0.799297 |
| O | O30 | 0.408057 | 0.432511 | 0.294137 |
| O | O31 | 0.132314 | 0.938393 | 0.791819 |
| O | O32 | 0.632850 | 0.955286 | 0.706761 |
| O | O33 | 0.906895 | 0.439446 | 0.215512 |
| O | O34 | 0.634303 | 0.531466 | 0.723225 |
| O | O35 | 0.906231 | 0.045436 | 0.214956 |
| O | O36 | 0.441668 | 0.123110 | 0.129702 |
| O | O37 | 0.112023 | 0.625512 | 0.638938 |
| O | O38 | 0.438932 | 0.361145 | 0.134461 |
| O | O39 | 0.112873 | 0.865016 | 0.631022 |
| O | O40 | 0.611323 | 0.865903 | 0.847386 |
| O | O41 | 0.940946 | 0.371927 | 0.376864 |
| O | O42 | 0.609324 | 0.618828 | 0.866141 |
| O | O43 | 0.935184 | 0.120618 | 0.372571 |
| O | O44 | 0.418682 | 0.993309 | 0.123302 |
| O | O45 | 0.121214 | 0.494132 | 0.623743 |
| O | O46 | 0.426646 | 0.492127 | 0.120517 |
| O | O47 | 0.113793 | 0.996603 | 0.616371 |
| O | O48 | 0.619520 | 0.994175 | 0.894892 |
| O | O49 | 0.915352 | 0.502095 | 0.387541 |
| O | O50 | 0.608282 | 0.488411 | 0.907038 |
| O | O51 | 0.916144 | 0.990255 | 0.393367 |
| O | O52 | 0.341797 | 0.039247 | 0.460653 |
| O | O53 | 0.200229 | 0.539071 | 0.964379 |
| O | O54 | 0.343296 | 0.452722 | 0.461127 |
| O | O55 | 0.198880 | 0.951531 | 0.957795 |
| O | O56 | 0.696708 | 0.941046 | 0.539220 |
| O | O57 | 0.841053 | 0.426795 | 0.048460 |
| O | O58 | 0.707954 | 0.540376 | 0.566271 |
| O | O59 | 0.841565 | 0.040955 | 0.044716 |
| O | O60 | 0.337009 | 0.947903 | 0.316151 |
| O | O61 | 0.210469 | 0.447038 | 0.820635 |

|   |      |          |          |          |
|---|------|----------|----------|----------|
| 0 | 062  | 0.337436 | 0.542632 | 0.314537 |
| 0 | 063  | 0.209553 | 0.043580 | 0.814313 |
| 0 | 064  | 0.717244 | 0.048329 | 0.651598 |
| 0 | 065  | 0.850150 | 0.545615 | 0.131450 |
| 0 | 066  | 0.724169 | 0.437855 | 0.690081 |
| 0 | 067  | 0.829787 | 0.941207 | 0.174533 |
| 0 | 068  | 0.272728 | 0.060772 | 0.297525 |
| 0 | 069  | 0.264368 | 0.564987 | 0.796760 |
| 0 | 070  | 0.277018 | 0.427077 | 0.296425 |
| 0 | 071  | 0.262477 | 0.925327 | 0.789740 |
| 0 | 072  | 0.762238 | 0.931515 | 0.708466 |
| 0 | 073  | 0.776456 | 0.451116 | 0.213058 |
| 0 | 074  | 0.760867 | 0.558117 | 0.744896 |
| 0 | 075  | 0.776590 | 0.059316 | 0.211737 |
| 0 | 076  | 0.315901 | 0.120293 | 0.609422 |
| 0 | 077  | 0.228345 | 0.617656 | 0.115690 |
| 0 | 078  | 0.318773 | 0.373394 | 0.612641 |
| 0 | 079  | 0.226279 | 0.870064 | 0.106694 |
| 0 | 080  | 0.711683 | 0.876053 | 0.371383 |
| 0 | 081  | 0.808722 | 0.356307 | 0.891340 |
| 0 | 082  | 0.717153 | 0.630100 | 0.425628 |
| 0 | 083  | 0.813846 | 0.124055 | 0.897783 |
| 0 | 084  | 0.221260 | 0.044396 | 0.532720 |
| 0 | 085  | 0.320606 | 0.540613 | 0.034233 |
| 0 | 086  | 0.221485 | 0.441329 | 0.525757 |
| 0 | 087  | 0.320481 | 0.942040 | 0.021406 |
| 0 | 088  | 0.816875 | 0.921507 | 0.469610 |
| 0 | 089  | 0.723306 | 0.442600 | 0.965523 |
| 0 | 090  | 0.825525 | 0.567805 | 0.492102 |
| 0 | 091  | 0.718456 | 0.055134 | 0.985800 |
| 0 | 092  | 0.317320 | 0.989813 | 0.638229 |
| 0 | 093  | 0.223911 | 0.486999 | 0.140201 |
| 0 | 094  | 0.309759 | 0.503844 | 0.635390 |
| 0 | 095  | 0.229831 | 0.000351 | 0.134487 |
| 0 | 096  | 0.736831 | 0.005238 | 0.379698 |
| 0 | 097  | 0.830445 | 0.486501 | 0.874094 |
| 0 | 098  | 0.738450 | 0.503135 | 0.383648 |
| 0 | 099  | 0.802970 | 0.994322 | 0.869416 |
| 0 | 0100 | 0.131129 | 0.127660 | 0.604033 |
| 0 | 0101 | 0.410224 | 0.623291 | 0.106528 |
| 0 | 0102 | 0.130876 | 0.362570 | 0.603740 |
| 0 | 0103 | 0.412243 | 0.862525 | 0.097089 |
| 0 | 0104 | 0.916222 | 0.856579 | 0.390459 |
| 0 | 0105 | 0.631093 | 0.357604 | 0.903265 |

|   |      |          |          |          |
|---|------|----------|----------|----------|
| 0 | 0106 | 0.919080 | 0.634911 | 0.396570 |
| 0 | 0107 | 0.624138 | 0.127035 | 0.902000 |
| 0 | 0108 | 0.105963 | 0.057998 | 0.443346 |
| 0 | 0109 | 0.436908 | 0.552229 | 0.947450 |
| 0 | 0110 | 0.101218 | 0.437425 | 0.449619 |
| 0 | 0111 | 0.441334 | 0.941002 | 0.946952 |
| 0 | 0112 | 0.932711 | 0.919847 | 0.558632 |
| 0 | 0113 | 0.616448 | 0.420096 | 0.074464 |
| 0 | 0114 | 0.947382 | 0.564689 | 0.555553 |
| 0 | 0115 | 0.600002 | 0.057878 | 0.064542 |
| 0 | 0116 | 0.145342 | 0.061641 | 0.255010 |
| 0 | 0117 | 0.392187 | 0.560387 | 0.762754 |
| 0 | 0118 | 0.147736 | 0.421646 | 0.266784 |
| 0 | 0119 | 0.392092 | 0.924151 | 0.766131 |
| 0 | 0120 | 0.889867 | 0.950243 | 0.740230 |
| 0 | 0121 | 0.650446 | 0.456508 | 0.258410 |
| 0 | 0122 | 0.890670 | 0.553972 | 0.733044 |
| 0 | 0123 | 0.648994 | 0.050351 | 0.248710 |
| 0 | 0124 | 0.115693 | 0.946749 | 0.338042 |
| 0 | 0125 | 0.431508 | 0.444165 | 0.833828 |
| 0 | 0126 | 0.120833 | 0.542257 | 0.332547 |
| 0 | 0127 | 0.429196 | 0.044059 | 0.824676 |
| 0 | 0128 | 0.953169 | 0.039672 | 0.630366 |
| 0 | 0129 | 0.590777 | 0.541838 | 0.135417 |
| 0 | 0130 | 0.946419 | 0.448911 | 0.645279 |
| 0 | 0131 | 0.605535 | 0.942431 | 0.159138 |
| 0 | 0132 | 0.226930 | 0.132647 | 0.149395 |
| 0 | 0133 | 0.318087 | 0.635424 | 0.652188 |
| 0 | 0134 | 0.227747 | 0.354335 | 0.151900 |
| 0 | 0135 | 0.317236 | 0.856859 | 0.645218 |
| 0 | 0136 | 0.823602 | 0.864868 | 0.848934 |
| 0 | 0137 | 0.728417 | 0.373370 | 0.353640 |
| 0 | 0138 | 0.832952 | 0.619747 | 0.877525 |
| 0 | 0139 | 0.720527 | 0.133731 | 0.351123 |
| 0 | 0140 | 0.523883 | 0.843275 | 0.199587 |
| 0 | 0141 | 0.023007 | 0.351890 | 0.715537 |
| 0 | 0142 | 0.523119 | 0.644519 | 0.205427 |
| 0 | 0143 | 0.020530 | 0.139994 | 0.710293 |
| 0 | 0144 | 0.520459 | 0.135289 | 0.781736 |
| 0 | 0145 | 0.028210 | 0.631015 | 0.287458 |
| 0 | 0146 | 0.524203 | 0.354580 | 0.788259 |
| 0 | 0147 | 0.025270 | 0.859171 | 0.281311 |
| 0 | 0148 | 0.410786 | 0.839977 | 0.291731 |
| 0 | 0149 | 0.139597 | 0.336611 | 0.796644 |

|   |      |          |          |          |
|---|------|----------|----------|----------|
| 0 | 0150 | 0.411458 | 0.651737 | 0.299469 |
| 0 | 0151 | 0.135531 | 0.152336 | 0.797610 |
| 0 | 0152 | 0.638332 | 0.148085 | 0.708162 |
| 0 | 0153 | 0.916894 | 0.649469 | 0.199065 |
| 0 | 0154 | 0.640718 | 0.336139 | 0.708634 |
| 0 | 0155 | 0.910725 | 0.837299 | 0.196281 |
| 0 | 0156 | 0.440736 | 0.743652 | 0.163690 |
| 0 | 0157 | 0.095219 | 0.245254 | 0.670293 |
| 0 | 0158 | 0.591030 | 0.243220 | 0.827432 |
| 0 | 0159 | 0.963890 | 0.745236 | 0.316135 |
| 0 | 0160 | 0.339839 | 0.853056 | 0.452800 |
| 0 | 0161 | 0.209160 | 0.352798 | 0.958575 |
| 0 | 0162 | 0.339221 | 0.633051 | 0.458592 |
| 0 | 0163 | 0.209155 | 0.135329 | 0.956068 |
| 0 | 0164 | 0.706554 | 0.158627 | 0.544785 |
| 0 | 0165 | 0.829240 | 0.666669 | 0.061300 |
| 0 | 0166 | 0.709125 | 0.349142 | 0.544407 |
| 0 | 0167 | 0.833644 | 0.842536 | 0.041178 |
| 0 | 0168 | 0.280286 | 0.832930 | 0.279591 |
| 0 | 0169 | 0.270590 | 0.333316 | 0.787612 |
| 0 | 0170 | 0.281789 | 0.659961 | 0.285878 |
| 0 | 0171 | 0.265919 | 0.159893 | 0.783175 |
| 0 | 0172 | 0.767900 | 0.159508 | 0.719421 |
| 0 | 0173 | 0.791230 | 0.636897 | 0.245201 |
| 0 | 0174 | 0.770715 | 0.316859 | 0.711019 |
| 0 | 0175 | 0.781989 | 0.823705 | 0.220883 |
| 0 | 0176 | 0.303422 | 0.744561 | 0.548824 |
| 0 | 0177 | 0.247761 | 0.243580 | 0.052613 |
| 0 | 0178 | 0.743909 | 0.252448 | 0.418976 |
| 0 | 0179 | 0.801265 | 0.745243 | 0.912681 |
| 0 | 0180 | 0.217633 | 0.842916 | 0.517791 |
| 0 | 0181 | 0.330111 | 0.344862 | 0.028627 |
| 0 | 0182 | 0.218022 | 0.644663 | 0.525925 |
| 0 | 0183 | 0.329972 | 0.141170 | 0.028525 |
| 0 | 0184 | 0.825140 | 0.152474 | 0.466538 |
| 0 | 0185 | 0.718215 | 0.648144 | 0.963172 |
| 0 | 0186 | 0.829984 | 0.345430 | 0.472205 |
| 0 | 0187 | 0.716386 | 0.841791 | 0.959853 |
| 0 | 0188 | 0.136901 | 0.744395 | 0.570730 |
| 0 | 0189 | 0.409523 | 0.242553 | 0.070249 |
| 0 | 0190 | 0.912039 | 0.246876 | 0.418657 |
| 0 | 0191 | 0.633447 | 0.743968 | 0.909648 |
| 0 | 0192 | 0.098827 | 0.835104 | 0.439217 |
| 0 | 0193 | 0.445955 | 0.334530 | 0.940698 |

|    |       |          |          |          |
|----|-------|----------|----------|----------|
| O  | O194  | 0.100308 | 0.648824 | 0.445791 |
| O  | O195  | 0.444836 | 0.151343 | 0.937819 |
| O  | O196  | 0.938120 | 0.161337 | 0.561880 |
| O  | O197  | 0.602534 | 0.660439 | 0.053313 |
| O  | O198  | 0.943471 | 0.329274 | 0.564175 |
| O  | O199  | 0.597001 | 0.838492 | 0.037755 |
| O  | O200  | 0.151217 | 0.831822 | 0.258048 |
| O  | O201  | 0.398718 | 0.328901 | 0.755419 |
| O  | O202  | 0.153226 | 0.661094 | 0.265463 |
| O  | O203  | 0.394605 | 0.161368 | 0.755691 |
| O  | O204  | 0.893562 | 0.128546 | 0.742853 |
| O  | O205  | 0.650272 | 0.639413 | 0.235545 |
| O  | O206  | 0.895507 | 0.349641 | 0.746254 |
| O  | O207  | 0.651893 | 0.824843 | 0.214652 |
| O  | O208  | 0.225018 | 0.744626 | 0.161697 |
| O  | O209  | 0.319740 | 0.246649 | 0.659890 |
| O  | O210  | 0.845414 | 0.239505 | 0.821482 |
| O  | O211  | 0.713771 | 0.746223 | 0.341615 |
| O  | O212  | 0.721612 | 0.761960 | 0.606872 |
| Al | Al213 | 0.719354 | 0.661325 | 0.300456 |
| Si | Si214 | 0.447053 | 0.053707 | 0.190751 |
| Si | Si215 | 0.096637 | 0.555242 | 0.693552 |
| Si | Si216 | 0.450080 | 0.431390 | 0.191515 |
| Si | Si217 | 0.093941 | 0.933978 | 0.686437 |
| Si | Si218 | 0.595622 | 0.941368 | 0.810776 |
| Si | Si219 | 0.946641 | 0.442905 | 0.319578 |
| Si | Si220 | 0.593016 | 0.545085 | 0.824217 |
| Si | Si221 | 0.944690 | 0.048111 | 0.320598 |
| Si | Si222 | 0.338927 | 0.026921 | 0.342058 |
| Si | Si223 | 0.202578 | 0.525861 | 0.846100 |
| Si | Si224 | 0.341479 | 0.463620 | 0.341950 |
| Si | Si225 | 0.200884 | 0.964681 | 0.839170 |
| Si | Si226 | 0.702291 | 0.968790 | 0.651870 |
| Si | Si227 | 0.843932 | 0.466520 | 0.153338 |
| Si | Si228 | 0.707258 | 0.516820 | 0.680853 |
| Si | Si229 | 0.838782 | 0.021441 | 0.161533 |
| Si | Si230 | 0.298712 | 0.048578 | 0.560900 |
| Si | Si231 | 0.243579 | 0.546276 | 0.064598 |
| Si | Si232 | 0.298211 | 0.442636 | 0.559320 |
| Si | Si233 | 0.243864 | 0.941035 | 0.055924 |
| Si | Si234 | 0.740960 | 0.935538 | 0.439578 |
| Si | Si235 | 0.800808 | 0.428258 | 0.944763 |
| Si | Si236 | 0.747835 | 0.560196 | 0.466688 |
| Si | Si237 | 0.794553 | 0.053728 | 0.949275 |

|    |       |          |          |          |
|----|-------|----------|----------|----------|
| Si | Si238 | 0.143312 | 0.056571 | 0.549423 |
| Si | Si239 | 0.398500 | 0.552022 | 0.052622 |
| Si | Si240 | 0.143901 | 0.434087 | 0.551029 |
| Si | Si241 | 0.397937 | 0.934735 | 0.047249 |
| Si | Si242 | 0.895652 | 0.922662 | 0.452138 |
| Si | Si243 | 0.645108 | 0.426880 | 0.962497 |
| Si | Si244 | 0.901850 | 0.567178 | 0.456670 |
| Si | Si245 | 0.640590 | 0.058549 | 0.960918 |
| Si | Si246 | 0.096921 | 0.025551 | 0.333752 |
| Si | Si247 | 0.444103 | 0.524087 | 0.835096 |
| Si | Si248 | 0.098050 | 0.464460 | 0.335936 |
| Si | Si249 | 0.445083 | 0.964861 | 0.831867 |
| Si | Si250 | 0.947382 | 0.961272 | 0.659875 |
| Si | Si251 | 0.596637 | 0.464861 | 0.171154 |
| Si | Si252 | 0.950221 | 0.528791 | 0.663729 |
| Si | Si253 | 0.594563 | 0.022096 | 0.172680 |
| Si | Si254 | 0.218698 | 0.063014 | 0.208813 |
| Si | Si255 | 0.320800 | 0.565201 | 0.711693 |
| Si | Si256 | 0.219172 | 0.423173 | 0.213606 |
| Si | Si257 | 0.321997 | 0.924903 | 0.709529 |
| Si | Si258 | 0.819794 | 0.935479 | 0.791397 |
| Si | Si259 | 0.723548 | 0.446133 | 0.301844 |
| Si | Si260 | 0.828887 | 0.554116 | 0.808103 |
| Si | Si261 | 0.720574 | 0.061553 | 0.297288 |
| Si | Si262 | 0.447337 | 0.822279 | 0.187420 |
| Si | Si263 | 0.096823 | 0.323908 | 0.696574 |
| Si | Si264 | 0.447176 | 0.665617 | 0.193007 |
| Si | Si265 | 0.095241 | 0.166429 | 0.695387 |
| Si | Si266 | 0.593580 | 0.163937 | 0.804865 |
| Si | Si267 | 0.956591 | 0.665581 | 0.299846 |
| Si | Si268 | 0.596598 | 0.322637 | 0.807296 |
| Si | Si269 | 0.953962 | 0.823939 | 0.295794 |
| Si | Si270 | 0.341706 | 0.868412 | 0.334831 |
| Si | Si271 | 0.207339 | 0.367411 | 0.840510 |
| Si | Si272 | 0.342297 | 0.621643 | 0.339611 |
| Si | Si273 | 0.204939 | 0.122842 | 0.837650 |
| Si | Si274 | 0.707442 | 0.128413 | 0.656256 |
| Si | Si275 | 0.845108 | 0.624346 | 0.161142 |
| Si | Si276 | 0.710789 | 0.359872 | 0.663516 |
| Si | Si277 | 0.838998 | 0.861393 | 0.157455 |
| Si | Si278 | 0.294021 | 0.824119 | 0.541421 |
| Si | Si279 | 0.253818 | 0.323575 | 0.048175 |
| Si | Si280 | 0.294390 | 0.664794 | 0.546326 |
| Si | Si281 | 0.253734 | 0.163680 | 0.046440 |

|    |       |          |          |          |
|----|-------|----------|----------|----------|
| Si | Si282 | 0.749145 | 0.174131 | 0.445611 |
| Si | Si283 | 0.795309 | 0.669416 | 0.953397 |
| Si | Si284 | 0.752957 | 0.330085 | 0.447577 |
| Si | Si285 | 0.793588 | 0.823218 | 0.941114 |
| Si | Si286 | 0.141355 | 0.822056 | 0.539347 |
| Si | Si287 | 0.406161 | 0.321006 | 0.043094 |
| Si | Si288 | 0.141684 | 0.665754 | 0.545287 |
| Si | Si289 | 0.406406 | 0.164439 | 0.041364 |
| Si | Si290 | 0.902903 | 0.169920 | 0.454391 |
| Si | Si291 | 0.641118 | 0.667626 | 0.948868 |
| Si | Si292 | 0.906607 | 0.323522 | 0.457575 |
| Si | Si293 | 0.639877 | 0.822149 | 0.938851 |
| Si | Si294 | 0.097930 | 0.868078 | 0.328782 |
| Si | Si295 | 0.450013 | 0.365550 | 0.829399 |
| Si | Si296 | 0.100880 | 0.620729 | 0.332701 |
| Si | Si297 | 0.447141 | 0.122939 | 0.825005 |
| Si | Si298 | 0.951024 | 0.117783 | 0.661575 |
| Si | Si299 | 0.593630 | 0.621661 | 0.159004 |
| Si | Si300 | 0.951975 | 0.369795 | 0.667834 |
| Si | Si301 | 0.594771 | 0.862492 | 0.152637 |
| Si | Si302 | 0.220622 | 0.820837 | 0.201487 |
| Si | Si303 | 0.326952 | 0.321688 | 0.703858 |
| Si | Si304 | 0.222179 | 0.669663 | 0.206861 |
| Si | Si305 | 0.323979 | 0.170959 | 0.701956 |
| Si | Si306 | 0.829996 | 0.162450 | 0.794785 |
| Si | Si307 | 0.830065 | 0.316132 | 0.792295 |
| Si | Si308 | 0.715426 | 0.818553 | 0.287001 |
| Zn | Zn309 | 0.690662 | 0.719694 | 0.495146 |

**C<sub>6</sub>H<sub>10</sub>-Phys.Ads-ZnOH<sup>+</sup> (Fig. 9b/M1 in Blue)** Total energy = -1954.30193768 eV

data\_

\_audit\_creation\_method 'Materials Studio'

\_cell\_length\_a 20.357621

\_cell\_length\_b 20.050598

\_cell\_length\_c 13.476578

\_cell\_angle\_alpha 90.000000

\_cell\_angle\_beta 90.000000

\_cell\_angle\_gamma 90.000000

\_symmetry\_space\_group\_name\_H-M 'P1'

loop\_

\_atom\_site\_type\_symbol

\_atom\_site\_label

\_atom\_site\_fract\_x



\_atom\_site\_fract\_y

\_atom\_site\_fract\_z

|   |     |          |          |          |
|---|-----|----------|----------|----------|
| H | H1  | 0.753489 | 0.758487 | 0.648099 |
| H | H2  | 0.619426 | 0.647739 | 0.622681 |
| H | H3  | 0.586962 | 0.640995 | 0.450316 |
| H | H4  | 0.482022 | 0.708276 | 0.430291 |
| H | H5  | 0.547740 | 0.747725 | 0.371260 |
| H | H6  | 0.473906 | 0.823741 | 0.479664 |
| H | H7  | 0.558762 | 0.830417 | 0.503452 |
| H | H8  | 0.463441 | 0.742958 | 0.622423 |
| H | H9  | 0.493508 | 0.820867 | 0.662215 |
| H | H10 | 0.555794 | 0.718864 | 0.731296 |
| H | H11 | 0.605687 | 0.778698 | 0.674706 |
| C | C12 | 0.591886 | 0.688912 | 0.590242 |
| C | C13 | 0.573541 | 0.684802 | 0.493371 |
| C | C14 | 0.528608 | 0.734421 | 0.444692 |
| C | C15 | 0.516395 | 0.796559 | 0.508560 |
| C | C16 | 0.505647 | 0.777048 | 0.617379 |
| C | C17 | 0.566751 | 0.742200 | 0.659633 |
| O | O18 | 0.515364 | 0.032896 | 0.217692 |
| O | O19 | 0.022989 | 0.534717 | 0.714568 |
| O | O20 | 0.524879 | 0.437328 | 0.210792 |
| O | O21 | 0.009324 | 0.933689 | 0.707700 |
| O | O22 | 0.513123 | 0.948984 | 0.789621 |
| O | O23 | 0.018341 | 0.455396 | 0.292802 |
| O | O24 | 0.516214 | 0.536175 | 0.791274 |
| O | O25 | 0.017441 | 0.036501 | 0.294107 |
| O | O26 | 0.397254 | 0.059252 | 0.288199 |
| O | O27 | 0.141508 | 0.561185 | 0.780978 |
| O | O28 | 0.403154 | 0.438319 | 0.275733 |
| O | O29 | 0.127261 | 0.940329 | 0.785053 |
| O | O30 | 0.627996 | 0.941710 | 0.707090 |
| O | O31 | 0.901246 | 0.438533 | 0.217237 |
| O | O32 | 0.638939 | 0.540404 | 0.737874 |
| O | O33 | 0.898870 | 0.039288 | 0.220401 |
| O | O34 | 0.437792 | 0.118340 | 0.122993 |
| O | O35 | 0.098935 | 0.618468 | 0.615697 |
| O | O36 | 0.437364 | 0.361918 | 0.122945 |
| O | O37 | 0.105385 | 0.862699 | 0.629126 |
| O | O38 | 0.600440 | 0.860757 | 0.855059 |
| O | O39 | 0.937072 | 0.367907 | 0.373926 |
| O | O40 | 0.596091 | 0.616803 | 0.885657 |
| O | O41 | 0.930048 | 0.117614 | 0.374156 |
| O | O42 | 0.409124 | 0.989393 | 0.123383 |

|   |     |          |          |          |
|---|-----|----------|----------|----------|
| 0 | 043 | 0.127723 | 0.489140 | 0.617869 |
| 0 | 044 | 0.432892 | 0.493326 | 0.100351 |
| 0 | 045 | 0.104134 | 0.993878 | 0.607125 |
| 0 | 046 | 0.619085 | 0.989638 | 0.890397 |
| 0 | 047 | 0.912185 | 0.497470 | 0.391879 |
| 0 | 048 | 0.605064 | 0.484830 | 0.911091 |
| 0 | 049 | 0.919254 | 0.986663 | 0.399427 |
| 0 | 050 | 0.336189 | 0.039560 | 0.458123 |
| 0 | 051 | 0.198896 | 0.542858 | 0.954196 |
| 0 | 052 | 0.340816 | 0.450208 | 0.446232 |
| 0 | 053 | 0.193879 | 0.951117 | 0.950973 |
| 0 | 054 | 0.690954 | 0.937957 | 0.540683 |
| 0 | 055 | 0.837233 | 0.425540 | 0.050512 |
| 0 | 056 | 0.703950 | 0.532869 | 0.571472 |
| 0 | 057 | 0.834443 | 0.033276 | 0.049804 |
| 0 | 058 | 0.336630 | 0.945019 | 0.317750 |
| 0 | 059 | 0.198828 | 0.446085 | 0.817579 |
| 0 | 060 | 0.329504 | 0.544879 | 0.307571 |
| 0 | 061 | 0.206150 | 0.044243 | 0.809566 |
| 0 | 062 | 0.706361 | 0.042520 | 0.660590 |
| 0 | 063 | 0.843311 | 0.544357 | 0.134252 |
| 0 | 064 | 0.716405 | 0.435582 | 0.705081 |
| 0 | 065 | 0.820879 | 0.935634 | 0.182974 |
| 0 | 066 | 0.266093 | 0.054867 | 0.295414 |
| 0 | 067 | 0.271762 | 0.554291 | 0.793277 |
| 0 | 068 | 0.272897 | 0.428502 | 0.281763 |
| 0 | 069 | 0.256941 | 0.925197 | 0.782519 |
| 0 | 070 | 0.758869 | 0.927526 | 0.708461 |
| 0 | 071 | 0.770826 | 0.448587 | 0.214533 |
| 0 | 072 | 0.767638 | 0.554931 | 0.738958 |
| 0 | 073 | 0.769916 | 0.055417 | 0.216274 |
| 0 | 074 | 0.307278 | 0.121016 | 0.606056 |
| 0 | 075 | 0.231675 | 0.619708 | 0.105429 |
| 0 | 076 | 0.320536 | 0.371231 | 0.599462 |
| 0 | 077 | 0.216321 | 0.869493 | 0.101053 |
| 0 | 078 | 0.707115 | 0.872338 | 0.374543 |
| 0 | 079 | 0.811169 | 0.356120 | 0.890801 |
| 0 | 080 | 0.717633 | 0.626816 | 0.436998 |
| 0 | 081 | 0.810505 | 0.116513 | 0.901437 |
| 0 | 082 | 0.216358 | 0.038512 | 0.534283 |
| 0 | 083 | 0.317356 | 0.532238 | 0.033968 |
| 0 | 084 | 0.219498 | 0.430915 | 0.508815 |
| 0 | 085 | 0.314986 | 0.935502 | 0.014797 |
| 0 | 086 | 0.810234 | 0.930165 | 0.462923 |

|   |      |          |          |          |
|---|------|----------|----------|----------|
| 0 | 087  | 0.722615 | 0.441670 | 0.959423 |
| 0 | 088  | 0.823032 | 0.559122 | 0.501980 |
| 0 | 089  | 0.711949 | 0.053105 | 0.991581 |
| 0 | 090  | 0.317231 | 0.991218 | 0.637252 |
| 0 | 091  | 0.212572 | 0.489794 | 0.131782 |
| 0 | 092  | 0.301000 | 0.501160 | 0.618210 |
| 0 | 093  | 0.228350 | 0.999349 | 0.126533 |
| 0 | 094  | 0.718382 | 0.003426 | 0.378645 |
| 0 | 095  | 0.832406 | 0.486014 | 0.876198 |
| 0 | 096  | 0.735076 | 0.500861 | 0.386497 |
| 0 | 097  | 0.792640 | 0.987861 | 0.874958 |
| 0 | 098  | 0.127331 | 0.124453 | 0.601365 |
| 0 | 099  | 0.403651 | 0.623008 | 0.095322 |
| 0 | 0100 | 0.128545 | 0.357020 | 0.594628 |
| 0 | 0101 | 0.407361 | 0.858558 | 0.092570 |
| 0 | 0102 | 0.906665 | 0.854041 | 0.396032 |
| 0 | 0103 | 0.630045 | 0.354511 | 0.905647 |
| 0 | 0104 | 0.913417 | 0.629932 | 0.405091 |
| 0 | 0105 | 0.617569 | 0.122145 | 0.903669 |
| 0 | 0106 | 0.104707 | 0.058220 | 0.436447 |
| 0 | 0107 | 0.425119 | 0.557550 | 0.929280 |
| 0 | 0108 | 0.095954 | 0.434897 | 0.445646 |
| 0 | 0109 | 0.437571 | 0.940306 | 0.947090 |
| 0 | 0110 | 0.920512 | 0.916494 | 0.565743 |
| 0 | 0111 | 0.620222 | 0.416804 | 0.077524 |
| 0 | 0112 | 0.946105 | 0.557033 | 0.560790 |
| 0 | 0113 | 0.590500 | 0.048385 | 0.060491 |
| 0 | 0114 | 0.140193 | 0.055227 | 0.246490 |
| 0 | 0115 | 0.395414 | 0.545819 | 0.736914 |
| 0 | 0116 | 0.142792 | 0.422467 | 0.262664 |
| 0 | 0117 | 0.387268 | 0.923070 | 0.767370 |
| 0 | 0118 | 0.885018 | 0.948611 | 0.750428 |
| 0 | 0119 | 0.645912 | 0.451456 | 0.265112 |
| 0 | 0120 | 0.897694 | 0.558030 | 0.744971 |
| 0 | 0121 | 0.640863 | 0.058688 | 0.242526 |
| 0 | 0122 | 0.107409 | 0.943838 | 0.338358 |
| 0 | 0123 | 0.431344 | 0.440085 | 0.841612 |
| 0 | 0124 | 0.113980 | 0.541966 | 0.333695 |
| 0 | 0125 | 0.424100 | 0.043327 | 0.825343 |
| 0 | 0126 | 0.943580 | 0.036972 | 0.633595 |
| 0 | 0127 | 0.593832 | 0.538685 | 0.136826 |
| 0 | 0128 | 0.933964 | 0.444220 | 0.660139 |
| 0 | 0129 | 0.605823 | 0.940710 | 0.173338 |
| 0 | 0130 | 0.222286 | 0.130497 | 0.148362 |

|   |      |          |          |          |
|---|------|----------|----------|----------|
| 0 | 0131 | 0.317714 | 0.630306 | 0.647177 |
| 0 | 0132 | 0.219407 | 0.356367 | 0.141678 |
| 0 | 0133 | 0.315403 | 0.857905 | 0.640447 |
| 0 | 0134 | 0.817156 | 0.860177 | 0.851755 |
| 0 | 0135 | 0.727100 | 0.370334 | 0.357689 |
| 0 | 0136 | 0.828772 | 0.619203 | 0.881611 |
| 0 | 0137 | 0.716380 | 0.133813 | 0.352723 |
| 0 | 0138 | 0.515493 | 0.847696 | 0.204952 |
| 0 | 0139 | 0.023536 | 0.353560 | 0.712372 |
| 0 | 0140 | 0.512669 | 0.631969 | 0.204573 |
| 0 | 0141 | 0.017487 | 0.133926 | 0.709541 |
| 0 | 0142 | 0.515691 | 0.133910 | 0.780779 |
| 0 | 0143 | 0.018969 | 0.628043 | 0.288613 |
| 0 | 0144 | 0.523444 | 0.352132 | 0.789870 |
| 0 | 0145 | 0.015637 | 0.856207 | 0.286265 |
| 0 | 0146 | 0.399367 | 0.830569 | 0.284667 |
| 0 | 0147 | 0.141381 | 0.329325 | 0.785764 |
| 0 | 0148 | 0.398222 | 0.655942 | 0.286756 |
| 0 | 0149 | 0.132353 | 0.153093 | 0.793827 |
| 0 | 0150 | 0.634406 | 0.148008 | 0.711329 |
| 0 | 0151 | 0.905051 | 0.649083 | 0.208884 |
| 0 | 0152 | 0.639894 | 0.328720 | 0.712250 |
| 0 | 0153 | 0.901165 | 0.831010 | 0.202807 |
| 0 | 0154 | 0.445145 | 0.740995 | 0.155062 |
| 0 | 0155 | 0.086868 | 0.241785 | 0.663645 |
| 0 | 0156 | 0.586721 | 0.240021 | 0.834554 |
| 0 | 0157 | 0.955953 | 0.742033 | 0.326148 |
| 0 | 0158 | 0.332536 | 0.846732 | 0.447909 |
| 0 | 0159 | 0.207479 | 0.348425 | 0.948774 |
| 0 | 0160 | 0.333427 | 0.635676 | 0.452393 |
| 0 | 0161 | 0.204271 | 0.134436 | 0.954061 |
| 0 | 0162 | 0.702700 | 0.150787 | 0.547750 |
| 0 | 0163 | 0.821352 | 0.665364 | 0.065610 |
| 0 | 0164 | 0.707934 | 0.353008 | 0.549664 |
| 0 | 0165 | 0.826227 | 0.839518 | 0.045353 |
| 0 | 0166 | 0.268792 | 0.836749 | 0.276414 |
| 0 | 0167 | 0.272202 | 0.341284 | 0.778583 |
| 0 | 0168 | 0.266975 | 0.659379 | 0.287533 |
| 0 | 0169 | 0.262816 | 0.161195 | 0.783274 |
| 0 | 0170 | 0.764423 | 0.151673 | 0.722101 |
| 0 | 0171 | 0.777945 | 0.632537 | 0.244926 |
| 0 | 0172 | 0.770723 | 0.316474 | 0.712122 |
| 0 | 0173 | 0.771818 | 0.816823 | 0.221778 |
| 0 | 0174 | 0.297429 | 0.742627 | 0.555108 |

|    |       |          |          |          |
|----|-------|----------|----------|----------|
| O  | O175  | 0.241961 | 0.242089 | 0.053305 |
| O  | O176  | 0.738084 | 0.250641 | 0.431186 |
| O  | O177  | 0.790995 | 0.742720 | 0.916761 |
| O  | O178  | 0.212166 | 0.841087 | 0.520532 |
| O  | O179  | 0.325860 | 0.341826 | 0.027449 |
| O  | O180  | 0.213831 | 0.641646 | 0.529199 |
| O  | O181  | 0.324727 | 0.140118 | 0.027328 |
| O  | O182  | 0.820961 | 0.150441 | 0.468783 |
| O  | O183  | 0.711938 | 0.642194 | 0.963104 |
| O  | O184  | 0.828017 | 0.342282 | 0.476332 |
| O  | O185  | 0.709115 | 0.841928 | 0.962784 |
| O  | O186  | 0.132102 | 0.741697 | 0.572081 |
| O  | O187  | 0.405164 | 0.240089 | 0.073700 |
| O  | O188  | 0.909135 | 0.243971 | 0.421009 |
| O  | O189  | 0.627611 | 0.741494 | 0.922353 |
| O  | O190  | 0.094942 | 0.830939 | 0.437327 |
| O  | O191  | 0.438882 | 0.324329 | 0.932755 |
| O  | O192  | 0.104176 | 0.657956 | 0.427680 |
| O  | O193  | 0.437733 | 0.153249 | 0.933301 |
| O  | O194  | 0.933821 | 0.158593 | 0.564138 |
| O  | O195  | 0.604082 | 0.661757 | 0.072315 |
| O  | O196  | 0.943730 | 0.329774 | 0.562260 |
| O  | O197  | 0.591325 | 0.839329 | 0.046779 |
| O  | O198  | 0.140465 | 0.830095 | 0.251522 |
| O  | O199  | 0.399417 | 0.329915 | 0.744082 |
| O  | O200  | 0.141168 | 0.653790 | 0.238568 |
| O  | O201  | 0.390678 | 0.158897 | 0.748535 |
| O  | O202  | 0.891230 | 0.129773 | 0.748071 |
| O  | O203  | 0.636425 | 0.633191 | 0.260098 |
| O  | O204  | 0.898234 | 0.332685 | 0.747588 |
| O  | O205  | 0.641652 | 0.818777 | 0.224952 |
| O  | O206  | 0.218021 | 0.744943 | 0.157675 |
| O  | O207  | 0.315954 | 0.246793 | 0.657551 |
| O  | O208  | 0.834073 | 0.234476 | 0.831938 |
| O  | O209  | 0.705780 | 0.741833 | 0.350137 |
| O  | O210  | 0.739990 | 0.777118 | 0.585155 |
| Al | Al211 | 0.710281 | 0.656403 | 0.311343 |
| Si | Si212 | 0.440233 | 0.050166 | 0.187491 |
| Si | Si213 | 0.097780 | 0.550815 | 0.681493 |
| Si | Si214 | 0.448784 | 0.433024 | 0.177323 |
| Si | Si215 | 0.086934 | 0.932793 | 0.681843 |
| Si | Si216 | 0.590109 | 0.935691 | 0.811916 |
| Si | Si217 | 0.942290 | 0.439982 | 0.319821 |
| Si | Si218 | 0.590188 | 0.544345 | 0.832949 |

|    |       |          |          |          |
|----|-------|----------|----------|----------|
| Si | Si219 | 0.940733 | 0.045088 | 0.322693 |
| Si | Si220 | 0.333875 | 0.024521 | 0.340197 |
| Si | Si221 | 0.202820 | 0.525784 | 0.837048 |
| Si | Si222 | 0.336687 | 0.465300 | 0.328146 |
| Si | Si223 | 0.196119 | 0.965227 | 0.832691 |
| Si | Si224 | 0.696474 | 0.962332 | 0.654383 |
| Si | Si225 | 0.838252 | 0.465087 | 0.155374 |
| Si | Si226 | 0.707043 | 0.515213 | 0.688557 |
| Si | Si227 | 0.831225 | 0.015630 | 0.167373 |
| Si | Si228 | 0.293878 | 0.047873 | 0.559290 |
| Si | Si229 | 0.240235 | 0.546356 | 0.056876 |
| Si | Si230 | 0.295636 | 0.438093 | 0.543781 |
| Si | Si231 | 0.238361 | 0.938749 | 0.049025 |
| Si | Si232 | 0.732610 | 0.935196 | 0.438805 |
| Si | Si233 | 0.800611 | 0.427477 | 0.944065 |
| Si | Si234 | 0.745464 | 0.554731 | 0.474027 |
| Si | Si235 | 0.787844 | 0.047853 | 0.954433 |
| Si | Si236 | 0.138407 | 0.053743 | 0.545088 |
| Si | Si237 | 0.394670 | 0.551549 | 0.040116 |
| Si | Si238 | 0.142947 | 0.428304 | 0.542171 |
| Si | Si239 | 0.392043 | 0.931109 | 0.044644 |
| Si | Si240 | 0.888938 | 0.921899 | 0.455558 |
| Si | Si241 | 0.644881 | 0.424095 | 0.963518 |
| Si | Si242 | 0.898809 | 0.560989 | 0.463898 |
| Si | Si243 | 0.634881 | 0.053327 | 0.960870 |
| Si | Si244 | 0.092116 | 0.023245 | 0.329309 |
| Si | Si245 | 0.441949 | 0.519627 | 0.825784 |
| Si | Si246 | 0.092719 | 0.463703 | 0.332981 |
| Si | Si247 | 0.440437 | 0.964237 | 0.832091 |
| Si | Si248 | 0.939257 | 0.958743 | 0.664477 |
| Si | Si249 | 0.596519 | 0.461389 | 0.172318 |
| Si | Si250 | 0.949825 | 0.523384 | 0.670624 |
| Si | Si251 | 0.588394 | 0.019992 | 0.173608 |
| Si | Si252 | 0.214267 | 0.059393 | 0.204048 |
| Si | Si253 | 0.321177 | 0.557342 | 0.698909 |
| Si | Si254 | 0.212159 | 0.424946 | 0.203995 |
| Si | Si255 | 0.318801 | 0.925153 | 0.706505 |
| Si | Si256 | 0.813604 | 0.931329 | 0.795462 |
| Si | Si257 | 0.719936 | 0.442894 | 0.306014 |
| Si | Si258 | 0.831615 | 0.554039 | 0.811256 |
| Si | Si259 | 0.711448 | 0.062191 | 0.297441 |
| Si | Si260 | 0.442050 | 0.819232 | 0.184058 |
| Si | Si261 | 0.094696 | 0.320207 | 0.689165 |
| Si | Si262 | 0.440617 | 0.662779 | 0.184679 |

|    |       |          |          |          |
|----|-------|----------|----------|----------|
| Si | Si263 | 0.090727 | 0.163439 | 0.691867 |
| Si | Si264 | 0.588685 | 0.161341 | 0.807575 |
| Si | Si265 | 0.947966 | 0.662709 | 0.307286 |
| Si | Si266 | 0.594865 | 0.318706 | 0.810970 |
| Si | Si267 | 0.944816 | 0.820298 | 0.302725 |
| Si | Si268 | 0.334002 | 0.864929 | 0.331023 |
| Si | Si269 | 0.205182 | 0.366289 | 0.832117 |
| Si | Si270 | 0.331985 | 0.623789 | 0.333364 |
| Si | Si271 | 0.201236 | 0.123251 | 0.835177 |
| Si | Si272 | 0.702105 | 0.122968 | 0.660468 |
| Si | Si273 | 0.835263 | 0.622511 | 0.165721 |
| Si | Si274 | 0.708463 | 0.358314 | 0.669592 |
| Si | Si275 | 0.830019 | 0.855999 | 0.162822 |
| Si | Si276 | 0.288749 | 0.821928 | 0.541168 |
| Si | Si277 | 0.248969 | 0.321781 | 0.043052 |
| Si | Si278 | 0.290233 | 0.662940 | 0.545475 |
| Si | Si279 | 0.248471 | 0.162263 | 0.045437 |
| Si | Si280 | 0.744603 | 0.171367 | 0.450133 |
| Si | Si281 | 0.788364 | 0.666695 | 0.957066 |
| Si | Si282 | 0.750438 | 0.328646 | 0.453956 |
| Si | Si283 | 0.785906 | 0.820927 | 0.945277 |
| Si | Si284 | 0.135832 | 0.819359 | 0.539297 |
| Si | Si285 | 0.401848 | 0.317366 | 0.038900 |
| Si | Si286 | 0.137204 | 0.664751 | 0.536313 |
| Si | Si287 | 0.401324 | 0.162787 | 0.039303 |
| Si | Si288 | 0.898796 | 0.167157 | 0.456481 |
| Si | Si289 | 0.635102 | 0.665258 | 0.961922 |
| Si | Si290 | 0.904433 | 0.320971 | 0.458179 |
| Si | Si291 | 0.632452 | 0.820485 | 0.947484 |
| Si | Si292 | 0.089776 | 0.865197 | 0.328121 |
| Si | Si293 | 0.448133 | 0.361632 | 0.826717 |
| Si | Si294 | 0.094647 | 0.620256 | 0.322211 |
| Si | Si295 | 0.441854 | 0.122233 | 0.822209 |
| Si | Si296 | 0.946060 | 0.115126 | 0.664114 |
| Si | Si297 | 0.588133 | 0.616699 | 0.170582 |
| Si | Si298 | 0.949685 | 0.365148 | 0.670344 |
| Si | Si299 | 0.588754 | 0.861907 | 0.162362 |
| Si | Si300 | 0.210881 | 0.821081 | 0.196822 |
| Si | Si301 | 0.326863 | 0.322863 | 0.695103 |
| Si | Si302 | 0.214431 | 0.668688 | 0.197161 |
| Si | Si303 | 0.319176 | 0.170896 | 0.698775 |
| Si | Si304 | 0.824867 | 0.157389 | 0.800112 |
| Si | Si305 | 0.828606 | 0.310848 | 0.795303 |
| Si | Si306 | 0.707371 | 0.813414 | 0.293099 |

Zn Zn307 0.695277 0.718534 0.505041

**TS-C<sub>6</sub>H<sub>10</sub>-Dehydro-on-HydroxyO-ZnOH<sup>+</sup> (Fig. 9b/TS1 in Blue)**

Total energy = -1952.18110572 eV

data\_

\_audit\_creation\_method 'Materials Studio'

\_cell\_length\_a 20.357621

\_cell\_length\_b 20.050598

\_cell\_length\_c 13.476578

\_cell\_angle\_alpha 90.000000

\_cell\_angle\_beta 90.000000

\_cell\_angle\_gamma 90.000000

\_symmetry\_space\_group\_name\_H-M 'P1'

loop\_

\_atom\_site\_type\_symbol

\_atom\_site\_label

\_atom\_site\_fract\_x

\_atom\_site\_fract\_y

\_atom\_site\_fract\_z

|   |     |          |          |          |
|---|-----|----------|----------|----------|
| H | H1  | 0.744824 | 0.722081 | 0.648010 |
| H | H2  | 0.665823 | 0.758164 | 0.605799 |
| H | H3  | 0.547060 | 0.744819 | 0.346317 |
| H | H4  | 0.541515 | 0.631002 | 0.403524 |
| H | H5  | 0.580352 | 0.612411 | 0.579862 |
| H | H6  | 0.496047 | 0.626198 | 0.579051 |
| H | H7  | 0.571919 | 0.694600 | 0.707062 |
| H | H8  | 0.502628 | 0.731708 | 0.652494 |
| H | H9  | 0.598796 | 0.807604 | 0.643005 |
| H | H10 | 0.586782 | 0.832400 | 0.459927 |
| H | H11 | 0.510981 | 0.813756 | 0.515030 |
| C | C12 | 0.549652 | 0.734711 | 0.425346 |
| C | C13 | 0.546011 | 0.670907 | 0.457732 |
| C | C14 | 0.543360 | 0.651155 | 0.565566 |
| C | C15 | 0.551672 | 0.711169 | 0.636127 |
| C | C16 | 0.593957 | 0.766321 | 0.589855 |
| C | C17 | 0.559330 | 0.792128 | 0.495999 |
| O | O18 | 0.520801 | 0.036894 | 0.217049 |
| O | O19 | 0.017932 | 0.545400 | 0.712948 |
| O | O20 | 0.525441 | 0.435960 | 0.215716 |
| O | O21 | 0.014053 | 0.933220 | 0.708590 |
| O | O22 | 0.517328 | 0.949397 | 0.789087 |
| O | O23 | 0.020793 | 0.456977 | 0.294437 |
| O | O24 | 0.516035 | 0.537978 | 0.789074 |



|   |     |          |          |          |
|---|-----|----------|----------|----------|
| 0 | 025 | 0.020694 | 0.031822 | 0.296167 |
| 0 | 026 | 0.402215 | 0.058876 | 0.289437 |
| 0 | 027 | 0.134231 | 0.552301 | 0.793848 |
| 0 | 028 | 0.405300 | 0.431691 | 0.289926 |
| 0 | 029 | 0.131767 | 0.936473 | 0.788389 |
| 0 | 030 | 0.632349 | 0.952509 | 0.705956 |
| 0 | 031 | 0.904545 | 0.438327 | 0.214252 |
| 0 | 032 | 0.634815 | 0.522484 | 0.723738 |
| 0 | 033 | 0.904283 | 0.037968 | 0.215569 |
| 0 | 034 | 0.440297 | 0.121875 | 0.126323 |
| 0 | 035 | 0.109557 | 0.621884 | 0.631202 |
| 0 | 036 | 0.436243 | 0.359951 | 0.131030 |
| 0 | 037 | 0.110066 | 0.862212 | 0.629143 |
| 0 | 038 | 0.609179 | 0.863517 | 0.845935 |
| 0 | 039 | 0.939594 | 0.369782 | 0.374212 |
| 0 | 040 | 0.610283 | 0.615284 | 0.858196 |
| 0 | 041 | 0.934171 | 0.117584 | 0.368151 |
| 0 | 042 | 0.416246 | 0.992361 | 0.121174 |
| 0 | 043 | 0.120007 | 0.490354 | 0.621051 |
| 0 | 044 | 0.427213 | 0.491308 | 0.117056 |
| 0 | 045 | 0.110681 | 0.993742 | 0.612708 |
| 0 | 046 | 0.620676 | 0.991516 | 0.894213 |
| 0 | 047 | 0.911919 | 0.499615 | 0.387450 |
| 0 | 048 | 0.605376 | 0.485942 | 0.908857 |
| 0 | 049 | 0.916652 | 0.987536 | 0.396854 |
| 0 | 050 | 0.339940 | 0.037630 | 0.457880 |
| 0 | 051 | 0.199276 | 0.537989 | 0.960123 |
| 0 | 052 | 0.341260 | 0.450431 | 0.457078 |
| 0 | 053 | 0.198130 | 0.949893 | 0.954336 |
| 0 | 054 | 0.696409 | 0.935484 | 0.539976 |
| 0 | 055 | 0.838301 | 0.424132 | 0.047992 |
| 0 | 056 | 0.706845 | 0.539168 | 0.566661 |
| 0 | 057 | 0.838765 | 0.035784 | 0.046370 |
| 0 | 058 | 0.336746 | 0.946491 | 0.312904 |
| 0 | 059 | 0.209154 | 0.445635 | 0.816947 |
| 0 | 060 | 0.333026 | 0.540712 | 0.311488 |
| 0 | 061 | 0.208839 | 0.041792 | 0.810790 |
| 0 | 062 | 0.717833 | 0.044452 | 0.648557 |
| 0 | 063 | 0.845414 | 0.543383 | 0.130750 |
| 0 | 064 | 0.728834 | 0.434703 | 0.685118 |
| 0 | 065 | 0.823144 | 0.936826 | 0.176458 |
| 0 | 066 | 0.270770 | 0.058716 | 0.294988 |
| 0 | 067 | 0.264482 | 0.563170 | 0.793462 |
| 0 | 068 | 0.274138 | 0.424761 | 0.292633 |

|   |      |          |          |          |
|---|------|----------|----------|----------|
| 0 | 069  | 0.261975 | 0.923611 | 0.786651 |
| 0 | 070  | 0.761486 | 0.927516 | 0.709193 |
| 0 | 071  | 0.773949 | 0.447485 | 0.212983 |
| 0 | 072  | 0.760145 | 0.556122 | 0.744387 |
| 0 | 073  | 0.775277 | 0.057043 | 0.214327 |
| 0 | 074  | 0.312992 | 0.118413 | 0.606576 |
| 0 | 075  | 0.230369 | 0.616299 | 0.110682 |
| 0 | 076  | 0.318466 | 0.372048 | 0.610010 |
| 0 | 077  | 0.223943 | 0.868885 | 0.104183 |
| 0 | 078  | 0.709039 | 0.871571 | 0.372053 |
| 0 | 079  | 0.807469 | 0.353633 | 0.889799 |
| 0 | 080  | 0.709138 | 0.624976 | 0.421438 |
| 0 | 081  | 0.817120 | 0.120525 | 0.899761 |
| 0 | 082  | 0.219680 | 0.040219 | 0.531918 |
| 0 | 083  | 0.319832 | 0.536007 | 0.029879 |
| 0 | 084  | 0.220016 | 0.437883 | 0.522385 |
| 0 | 085  | 0.319489 | 0.938934 | 0.018691 |
| 0 | 086  | 0.815732 | 0.917848 | 0.465634 |
| 0 | 087  | 0.721201 | 0.439640 | 0.962470 |
| 0 | 088  | 0.822131 | 0.569369 | 0.487317 |
| 0 | 089  | 0.716979 | 0.056823 | 0.985144 |
| 0 | 090  | 0.317795 | 0.988031 | 0.635865 |
| 0 | 091  | 0.221729 | 0.485764 | 0.136430 |
| 0 | 092  | 0.307540 | 0.502632 | 0.630452 |
| 0 | 093  | 0.229524 | 0.999256 | 0.130416 |
| 0 | 094  | 0.733400 | 0.000905 | 0.379801 |
| 0 | 095  | 0.829019 | 0.483855 | 0.873848 |
| 0 | 096  | 0.737250 | 0.498063 | 0.385442 |
| 0 | 097  | 0.798859 | 0.991775 | 0.870038 |
| 0 | 098  | 0.129848 | 0.124593 | 0.601862 |
| 0 | 099  | 0.408186 | 0.621685 | 0.099160 |
| 0 | 0100 | 0.128799 | 0.359055 | 0.598357 |
| 0 | 0101 | 0.412306 | 0.861339 | 0.095647 |
| 0 | 0102 | 0.917460 | 0.853807 | 0.391882 |
| 0 | 0103 | 0.628252 | 0.354825 | 0.902516 |
| 0 | 0104 | 0.919198 | 0.632566 | 0.394990 |
| 0 | 0105 | 0.620496 | 0.124712 | 0.899710 |
| 0 | 0106 | 0.105529 | 0.055741 | 0.440008 |
| 0 | 0107 | 0.435611 | 0.549200 | 0.941919 |
| 0 | 0108 | 0.099823 | 0.435249 | 0.445775 |
| 0 | 0109 | 0.440679 | 0.939996 | 0.945547 |
| 0 | 0110 | 0.928957 | 0.916094 | 0.561795 |
| 0 | 0111 | 0.615941 | 0.416401 | 0.074845 |
| 0 | 0112 | 0.943357 | 0.562524 | 0.554980 |

|   |      |          |          |          |
|---|------|----------|----------|----------|
| 0 | 0113 | 0.598210 | 0.056153 | 0.062646 |
| 0 | 0114 | 0.143672 | 0.058584 | 0.251065 |
| 0 | 0115 | 0.392115 | 0.557572 | 0.756392 |
| 0 | 0116 | 0.144750 | 0.420410 | 0.261825 |
| 0 | 0117 | 0.391739 | 0.922412 | 0.764687 |
| 0 | 0118 | 0.888629 | 0.949307 | 0.743767 |
| 0 | 0119 | 0.648117 | 0.456275 | 0.258050 |
| 0 | 0120 | 0.890173 | 0.551624 | 0.734385 |
| 0 | 0121 | 0.647247 | 0.045197 | 0.246364 |
| 0 | 0122 | 0.115495 | 0.943843 | 0.336019 |
| 0 | 0123 | 0.429976 | 0.441253 | 0.828223 |
| 0 | 0124 | 0.119517 | 0.540690 | 0.330202 |
| 0 | 0125 | 0.427371 | 0.042838 | 0.822921 |
| 0 | 0126 | 0.951181 | 0.036646 | 0.629201 |
| 0 | 0127 | 0.587314 | 0.538303 | 0.131441 |
| 0 | 0128 | 0.943669 | 0.446301 | 0.643636 |
| 0 | 0129 | 0.600842 | 0.939649 | 0.153273 |
| 0 | 0130 | 0.225024 | 0.131233 | 0.147022 |
| 0 | 0131 | 0.317844 | 0.633916 | 0.648505 |
| 0 | 0132 | 0.225016 | 0.352903 | 0.147393 |
| 0 | 0133 | 0.317246 | 0.854979 | 0.642917 |
| 0 | 0134 | 0.822921 | 0.862875 | 0.852025 |
| 0 | 0135 | 0.723675 | 0.369386 | 0.351257 |
| 0 | 0136 | 0.831575 | 0.617156 | 0.878419 |
| 0 | 0137 | 0.715746 | 0.129194 | 0.353054 |
| 0 | 0138 | 0.522958 | 0.838467 | 0.198997 |
| 0 | 0139 | 0.021189 | 0.349052 | 0.710875 |
| 0 | 0140 | 0.520789 | 0.642104 | 0.199318 |
| 0 | 0141 | 0.018626 | 0.137680 | 0.706598 |
| 0 | 0142 | 0.517743 | 0.134796 | 0.777991 |
| 0 | 0143 | 0.026913 | 0.628892 | 0.283092 |
| 0 | 0144 | 0.522678 | 0.351195 | 0.785044 |
| 0 | 0145 | 0.024636 | 0.856559 | 0.279153 |
| 0 | 0146 | 0.409532 | 0.837596 | 0.290064 |
| 0 | 0147 | 0.137902 | 0.335504 | 0.791859 |
| 0 | 0148 | 0.409155 | 0.647498 | 0.293088 |
| 0 | 0149 | 0.133064 | 0.149399 | 0.795524 |
| 0 | 0150 | 0.636201 | 0.142013 | 0.705610 |
| 0 | 0151 | 0.914493 | 0.646111 | 0.197715 |
| 0 | 0152 | 0.640291 | 0.337297 | 0.707573 |
| 0 | 0153 | 0.908839 | 0.836748 | 0.197241 |
| 0 | 0154 | 0.437728 | 0.741399 | 0.160360 |
| 0 | 0155 | 0.094006 | 0.242443 | 0.667614 |
| 0 | 0156 | 0.591838 | 0.240822 | 0.821208 |

|   |      |          |          |          |
|---|------|----------|----------|----------|
| 0 | 0157 | 0.962574 | 0.742790 | 0.312674 |
| 0 | 0158 | 0.337604 | 0.852246 | 0.450181 |
| 0 | 0159 | 0.206891 | 0.350921 | 0.954263 |
| 0 | 0160 | 0.338626 | 0.631841 | 0.454809 |
| 0 | 0161 | 0.207395 | 0.133039 | 0.953423 |
| 0 | 0162 | 0.707884 | 0.156834 | 0.546757 |
| 0 | 0163 | 0.825663 | 0.664876 | 0.062307 |
| 0 | 0164 | 0.708256 | 0.344830 | 0.542751 |
| 0 | 0165 | 0.830025 | 0.837784 | 0.043986 |
| 0 | 0166 | 0.279326 | 0.831820 | 0.276046 |
| 0 | 0167 | 0.268977 | 0.331833 | 0.783872 |
| 0 | 0168 | 0.279403 | 0.658974 | 0.283868 |
| 0 | 0169 | 0.263174 | 0.159110 | 0.780098 |
| 0 | 0170 | 0.764864 | 0.154934 | 0.725231 |
| 0 | 0171 | 0.789272 | 0.635036 | 0.247320 |
| 0 | 0172 | 0.769427 | 0.312239 | 0.710102 |
| 0 | 0173 | 0.781137 | 0.817334 | 0.225227 |
| 0 | 0174 | 0.301882 | 0.743058 | 0.545354 |
| 0 | 0175 | 0.245589 | 0.241852 | 0.048930 |
| 0 | 0176 | 0.741541 | 0.248613 | 0.415760 |
| 0 | 0177 | 0.799008 | 0.742475 | 0.911492 |
| 0 | 0178 | 0.216170 | 0.841766 | 0.518033 |
| 0 | 0179 | 0.327785 | 0.343233 | 0.024616 |
| 0 | 0180 | 0.217418 | 0.642293 | 0.523046 |
| 0 | 0181 | 0.328079 | 0.139477 | 0.026105 |
| 0 | 0182 | 0.823865 | 0.149112 | 0.460654 |
| 0 | 0183 | 0.716067 | 0.645364 | 0.961460 |
| 0 | 0184 | 0.827712 | 0.342327 | 0.465700 |
| 0 | 0185 | 0.713959 | 0.838710 | 0.958297 |
| 0 | 0186 | 0.136492 | 0.741964 | 0.569245 |
| 0 | 0187 | 0.407125 | 0.241221 | 0.067742 |
| 0 | 0188 | 0.910873 | 0.244051 | 0.415078 |
| 0 | 0189 | 0.632162 | 0.740850 | 0.904526 |
| 0 | 0190 | 0.098057 | 0.832233 | 0.437190 |
| 0 | 0191 | 0.444181 | 0.332799 | 0.937805 |
| 0 | 0192 | 0.100946 | 0.649584 | 0.438913 |
| 0 | 0193 | 0.442568 | 0.150793 | 0.934512 |
| 0 | 0194 | 0.936373 | 0.157756 | 0.557656 |
| 0 | 0195 | 0.597945 | 0.655823 | 0.045010 |
| 0 | 0196 | 0.940086 | 0.326821 | 0.561259 |
| 0 | 0197 | 0.594427 | 0.833516 | 0.035548 |
| 0 | 0198 | 0.150325 | 0.828615 | 0.256087 |
| 0 | 0199 | 0.397154 | 0.325296 | 0.752673 |
| 0 | 0200 | 0.151382 | 0.658048 | 0.256427 |

|    |       |          |          |          |
|----|-------|----------|----------|----------|
| O  | O201  | 0.391793 | 0.159496 | 0.752563 |
| O  | O202  | 0.891624 | 0.126715 | 0.738985 |
| O  | O203  | 0.649204 | 0.636573 | 0.225049 |
| O  | O204  | 0.894059 | 0.346260 | 0.744479 |
| O  | O205  | 0.651676 | 0.824296 | 0.210676 |
| O  | O206  | 0.224615 | 0.743166 | 0.157450 |
| O  | O207  | 0.317326 | 0.244876 | 0.655878 |
| O  | O208  | 0.844381 | 0.236464 | 0.821941 |
| O  | O209  | 0.706403 | 0.742097 | 0.340405 |
| O  | O210  | 0.725404 | 0.750857 | 0.597990 |
| Al | Al211 | 0.715107 | 0.657886 | 0.297301 |
| Si | Si212 | 0.445091 | 0.052719 | 0.188176 |
| Si | Si213 | 0.095470 | 0.552464 | 0.688791 |
| Si | Si214 | 0.448275 | 0.429857 | 0.188379 |
| Si | Si215 | 0.091972 | 0.931506 | 0.684320 |
| Si | Si216 | 0.594915 | 0.939532 | 0.810107 |
| Si | Si217 | 0.944212 | 0.441455 | 0.318431 |
| Si | Si218 | 0.592317 | 0.540451 | 0.821894 |
| Si | Si219 | 0.943711 | 0.043795 | 0.320098 |
| Si | Si220 | 0.337372 | 0.025473 | 0.339260 |
| Si | Si221 | 0.201931 | 0.524616 | 0.841828 |
| Si | Si222 | 0.338398 | 0.461724 | 0.338067 |
| Si | Si223 | 0.200255 | 0.962874 | 0.835726 |
| Si | Si224 | 0.702102 | 0.965061 | 0.651471 |
| Si | Si225 | 0.840885 | 0.464135 | 0.152691 |
| Si | Si226 | 0.708090 | 0.512865 | 0.679816 |
| Si | Si227 | 0.835643 | 0.016676 | 0.163261 |
| Si | Si228 | 0.297254 | 0.046176 | 0.558630 |
| Si | Si229 | 0.242976 | 0.544199 | 0.060249 |
| Si | Si230 | 0.296678 | 0.440549 | 0.555755 |
| Si | Si231 | 0.242795 | 0.939272 | 0.052726 |
| Si | Si232 | 0.739352 | 0.931109 | 0.438920 |
| Si | Si233 | 0.798921 | 0.425373 | 0.943567 |
| Si | Si234 | 0.744519 | 0.557903 | 0.464651 |
| Si | Si235 | 0.793235 | 0.051337 | 0.950283 |
| Si | Si236 | 0.141750 | 0.053518 | 0.546964 |
| Si | Si237 | 0.397526 | 0.549511 | 0.047327 |
| Si | Si238 | 0.142376 | 0.430922 | 0.547108 |
| Si | Si239 | 0.396916 | 0.933136 | 0.045416 |
| Si | Si240 | 0.894818 | 0.919296 | 0.453203 |
| Si | Si241 | 0.642981 | 0.423824 | 0.962023 |
| Si | Si242 | 0.899015 | 0.565744 | 0.454953 |
| Si | Si243 | 0.639155 | 0.057185 | 0.959422 |
| Si | Si244 | 0.096088 | 0.022494 | 0.330998 |

|    |       |          |          |          |
|----|-------|----------|----------|----------|
| Si | Si245 | 0.443264 | 0.521038 | 0.829726 |
| Si | Si246 | 0.095940 | 0.463133 | 0.332659 |
| Si | Si247 | 0.444190 | 0.963826 | 0.830460 |
| Si | Si248 | 0.945262 | 0.958705 | 0.661257 |
| Si | Si249 | 0.594596 | 0.462100 | 0.169863 |
| Si | Si250 | 0.948314 | 0.526136 | 0.662451 |
| Si | Si251 | 0.592028 | 0.019308 | 0.169835 |
| Si | Si252 | 0.217224 | 0.061156 | 0.205626 |
| Si | Si253 | 0.320173 | 0.563406 | 0.707251 |
| Si | Si254 | 0.216456 | 0.421648 | 0.209331 |
| Si | Si255 | 0.321937 | 0.923057 | 0.707180 |
| Si | Si256 | 0.818324 | 0.933007 | 0.793226 |
| Si | Si257 | 0.720800 | 0.442927 | 0.301489 |
| Si | Si258 | 0.827998 | 0.551649 | 0.808530 |
| Si | Si259 | 0.717726 | 0.057543 | 0.297759 |
| Si | Si260 | 0.445858 | 0.819666 | 0.185777 |
| Si | Si261 | 0.095108 | 0.321307 | 0.692277 |
| Si | Si262 | 0.444684 | 0.663027 | 0.187197 |
| Si | Si263 | 0.093525 | 0.163623 | 0.692627 |
| Si | Si264 | 0.591621 | 0.161209 | 0.801178 |
| Si | Si265 | 0.955311 | 0.663111 | 0.297244 |
| Si | Si266 | 0.595581 | 0.320643 | 0.804461 |
| Si | Si267 | 0.953235 | 0.821822 | 0.295150 |
| Si | Si268 | 0.340590 | 0.866967 | 0.332226 |
| Si | Si269 | 0.205593 | 0.365964 | 0.836324 |
| Si | Si270 | 0.339955 | 0.619655 | 0.335857 |
| Si | Si271 | 0.203030 | 0.120866 | 0.834931 |
| Si | Si272 | 0.706792 | 0.124352 | 0.656670 |
| Si | Si273 | 0.842003 | 0.622029 | 0.161632 |
| Si | Si274 | 0.711203 | 0.357014 | 0.661373 |
| Si | Si275 | 0.835782 | 0.857330 | 0.159986 |
| Si | Si276 | 0.292808 | 0.822723 | 0.539380 |
| Si | Si277 | 0.251465 | 0.321873 | 0.044072 |
| Si | Si278 | 0.293682 | 0.663249 | 0.542799 |
| Si | Si279 | 0.251772 | 0.161909 | 0.043708 |
| Si | Si280 | 0.747415 | 0.170657 | 0.444305 |
| Si | Si281 | 0.793159 | 0.666842 | 0.953466 |
| Si | Si282 | 0.750464 | 0.326290 | 0.444108 |
| Si | Si283 | 0.791434 | 0.820262 | 0.942061 |
| Si | Si284 | 0.140046 | 0.819749 | 0.538023 |
| Si | Si285 | 0.403808 | 0.319522 | 0.039784 |
| Si | Si286 | 0.140984 | 0.663776 | 0.540552 |
| Si | Si287 | 0.404417 | 0.163155 | 0.038498 |
| Si | Si288 | 0.901638 | 0.166852 | 0.449900 |

|    |       |          |          |          |
|----|-------|----------|----------|----------|
| Si | Si289 | 0.639195 | 0.664234 | 0.943336 |
| Si | Si290 | 0.904599 | 0.320788 | 0.453619 |
| Si | Si291 | 0.637596 | 0.818794 | 0.936484 |
| Si | Si292 | 0.097281 | 0.865235 | 0.326801 |
| Si | Si293 | 0.448477 | 0.362622 | 0.825810 |
| Si | Si294 | 0.099958 | 0.619252 | 0.327154 |
| Si | Si295 | 0.444732 | 0.121839 | 0.822007 |
| Si | Si296 | 0.949161 | 0.115089 | 0.658225 |
| Si | Si297 | 0.590754 | 0.618408 | 0.152080 |
| Si | Si298 | 0.949689 | 0.367029 | 0.664946 |
| Si | Si299 | 0.592666 | 0.859378 | 0.149706 |
| Si | Si300 | 0.219555 | 0.819082 | 0.198428 |
| Si | Si301 | 0.325433 | 0.319636 | 0.700522 |
| Si | Si302 | 0.221494 | 0.667997 | 0.201755 |
| Si | Si303 | 0.321282 | 0.169331 | 0.698685 |
| Si | Si304 | 0.829336 | 0.159246 | 0.795789 |
| Si | Si305 | 0.828890 | 0.312781 | 0.791348 |
| Si | Si306 | 0.712539 | 0.814621 | 0.287080 |
| Zn | Zn307 | 0.670805 | 0.712097 | 0.484615 |

**M-C<sub>6</sub>H<sub>9</sub>Zn-OH<sub>2</sub>-ZnOH<sup>+</sup> (Fig. 9b/M2 in Blue)** Total energy = -1953.75185020 eV

data\_

\_audit\_creation\_method 'Materials Studio'

\_cell\_length\_a 20.357621

\_cell\_length\_b 20.050598

\_cell\_length\_c 13.476578

\_cell\_angle\_alpha 90.000000

\_cell\_angle\_beta 90.000000

\_cell\_angle\_gamma 90.000000

\_symmetry\_space\_group\_name\_H-M 'P1'

loop\_

\_atom\_site\_type\_symbol

\_atom\_site\_label

\_atom\_site\_fract\_x

\_atom\_site\_fract\_y

\_atom\_site\_fract\_z

|   |    |          |          |          |
|---|----|----------|----------|----------|
| H | H1 | 0.768800 | 0.717531 | 0.565613 |
| H | H2 | 0.727606 | 0.748242 | 0.651576 |
| H | H3 | 0.560361 | 0.782727 | 0.436290 |
| H | H4 | 0.505735 | 0.835631 | 0.568965 |
| H | H5 | 0.581618 | 0.817081 | 0.621596 |
| H | H6 | 0.453178 | 0.670835 | 0.724578 |
| H | H7 | 0.497014 | 0.781210 | 0.744000 |

|   |     |          |          |          |
|---|-----|----------|----------|----------|
| H | H8  | 0.505040 | 0.673231 | 0.411012 |
| H | H9  | 0.451426 | 0.732480 | 0.463632 |
| H | H10 | 0.518380 | 0.616523 | 0.571673 |
| H | H11 | 0.434356 | 0.629781 | 0.553554 |
| C | C12 | 0.552647 | 0.750078 | 0.500640 |
| C | C13 | 0.537244 | 0.793407 | 0.591935 |
| C | C14 | 0.477666 | 0.694412 | 0.662123 |
| C | C15 | 0.502464 | 0.755813 | 0.673108 |
| C | C16 | 0.495708 | 0.702272 | 0.478330 |
| C | C17 | 0.480859 | 0.656042 | 0.566101 |
| O | O18 | 0.488677 | 0.030714 | 0.211992 |
| O | O19 | 0.995428 | 0.532255 | 0.709671 |
| O | O20 | 0.499115 | 0.442726 | 0.206219 |
| O | O21 | 0.987705 | 0.943620 | 0.706838 |
| O | O22 | 0.495054 | 0.958099 | 0.790134 |
| O | O23 | 0.991398 | 0.460270 | 0.291216 |
| O | O24 | 0.487690 | 0.542466 | 0.793088 |
| O | O25 | 0.997592 | 0.044293 | 0.292833 |
| O | O26 | 0.371506 | 0.059191 | 0.283164 |
| O | O27 | 0.111803 | 0.558431 | 0.785452 |
| O | O28 | 0.377048 | 0.452807 | 0.268159 |
| O | O29 | 0.109897 | 0.955705 | 0.765676 |
| O | O30 | 0.612742 | 0.933428 | 0.717890 |
| O | O31 | 0.876093 | 0.431271 | 0.213225 |
| O | O32 | 0.609431 | 0.537536 | 0.731396 |
| O | O33 | 0.873692 | 0.035670 | 0.239764 |
| O | O34 | 0.412134 | 0.115854 | 0.116331 |
| O | O35 | 0.074316 | 0.617723 | 0.619140 |
| O | O36 | 0.409249 | 0.365677 | 0.127131 |
| O | O37 | 0.078011 | 0.866991 | 0.626698 |
| O | O38 | 0.572958 | 0.871289 | 0.880276 |
| O | O39 | 0.914652 | 0.370136 | 0.376878 |
| O | O40 | 0.575251 | 0.623469 | 0.871824 |
| O | O41 | 0.910607 | 0.121669 | 0.379960 |
| O | O42 | 0.379989 | 0.986889 | 0.121201 |
| O | O43 | 0.104934 | 0.488280 | 0.620921 |
| O | O44 | 0.409771 | 0.495939 | 0.087675 |
| O | O45 | 0.074690 | 0.996905 | 0.585068 |
| O | O46 | 0.602995 | 0.000623 | 0.884512 |
| O | O47 | 0.880181 | 0.498102 | 0.381408 |
| O | O48 | 0.578451 | 0.493102 | 0.911760 |
| O | O49 | 0.912575 | 0.991078 | 0.416744 |
| O | O50 | 0.306972 | 0.062785 | 0.450962 |
| O | O51 | 0.176997 | 0.563478 | 0.952812 |



|   |     |          |          |          |
|---|-----|----------|----------|----------|
| 0 | 052 | 0.310001 | 0.448247 | 0.433776 |
| 0 | 053 | 0.176434 | 0.945847 | 0.931185 |
| 0 | 054 | 0.680198 | 0.926182 | 0.553258 |
| 0 | 055 | 0.811228 | 0.424486 | 0.045745 |
| 0 | 056 | 0.677494 | 0.533699 | 0.568750 |
| 0 | 057 | 0.809083 | 0.045188 | 0.072255 |
| 0 | 058 | 0.320922 | 0.947103 | 0.356977 |
| 0 | 059 | 0.166217 | 0.447968 | 0.857862 |
| 0 | 060 | 0.295556 | 0.551961 | 0.314267 |
| 0 | 061 | 0.194086 | 0.051308 | 0.815644 |
| 0 | 062 | 0.666157 | 0.043836 | 0.641890 |
| 0 | 063 | 0.826373 | 0.541790 | 0.133141 |
| 0 | 064 | 0.691158 | 0.435953 | 0.698607 |
| 0 | 065 | 0.792344 | 0.938428 | 0.185302 |
| 0 | 066 | 0.241635 | 0.040188 | 0.285285 |
| 0 | 067 | 0.242211 | 0.544072 | 0.786175 |
| 0 | 068 | 0.247755 | 0.435023 | 0.262015 |
| 0 | 069 | 0.238522 | 0.933742 | 0.759027 |
| 0 | 070 | 0.742747 | 0.950810 | 0.719858 |
| 0 | 071 | 0.746242 | 0.450440 | 0.210339 |
| 0 | 072 | 0.738706 | 0.555311 | 0.739612 |
| 0 | 073 | 0.744641 | 0.054626 | 0.242090 |
| 0 | 074 | 0.277137 | 0.131159 | 0.611891 |
| 0 | 075 | 0.210874 | 0.630387 | 0.113374 |
| 0 | 076 | 0.303669 | 0.375360 | 0.592183 |
| 0 | 077 | 0.182274 | 0.874041 | 0.091039 |
| 0 | 078 | 0.706594 | 0.866787 | 0.384733 |
| 0 | 079 | 0.778860 | 0.359775 | 0.883352 |
| 0 | 080 | 0.684420 | 0.623040 | 0.429861 |
| 0 | 081 | 0.798538 | 0.116393 | 0.911970 |
| 0 | 082 | 0.194413 | 0.038980 | 0.544559 |
| 0 | 083 | 0.290628 | 0.537046 | 0.041482 |
| 0 | 084 | 0.192669 | 0.423851 | 0.510681 |
| 0 | 085 | 0.293333 | 0.922483 | 0.009605 |
| 0 | 086 | 0.791563 | 0.953632 | 0.457478 |
| 0 | 087 | 0.697009 | 0.450127 | 0.957792 |
| 0 | 088 | 0.794740 | 0.563678 | 0.495486 |
| 0 | 089 | 0.690920 | 0.063402 | 0.994831 |
| 0 | 090 | 0.307085 | 0.002642 | 0.625371 |
| 0 | 091 | 0.178958 | 0.502059 | 0.126252 |
| 0 | 092 | 0.273731 | 0.504004 | 0.604174 |
| 0 | 093 | 0.211182 | 0.002843 | 0.101389 |
| 0 | 094 | 0.677466 | 0.996196 | 0.387540 |
| 0 | 095 | 0.808466 | 0.488595 | 0.874372 |

|   |      |          |          |          |
|---|------|----------|----------|----------|
| 0 | 096  | 0.710148 | 0.496060 | 0.386840 |
| 0 | 097  | 0.776577 | 0.986197 | 0.903081 |
| 0 | 098  | 0.102861 | 0.126929 | 0.595002 |
| 0 | 099  | 0.379420 | 0.625824 | 0.097982 |
| 0 | 0100 | 0.090915 | 0.358790 | 0.585306 |
| 0 | 0101 | 0.396558 | 0.858246 | 0.081652 |
| 0 | 0102 | 0.880145 | 0.862184 | 0.404840 |
| 0 | 0103 | 0.606958 | 0.363618 | 0.897281 |
| 0 | 0104 | 0.892430 | 0.628748 | 0.409058 |
| 0 | 0105 | 0.591395 | 0.130549 | 0.915438 |
| 0 | 0106 | 0.095216 | 0.066105 | 0.421232 |
| 0 | 0107 | 0.392046 | 0.566066 | 0.923963 |
| 0 | 0108 | 0.071835 | 0.444823 | 0.441941 |
| 0 | 0109 | 0.413826 | 0.946665 | 0.940993 |
| 0 | 0110 | 0.889377 | 0.921281 | 0.579753 |
| 0 | 0111 | 0.594152 | 0.420424 | 0.073103 |
| 0 | 0112 | 0.916614 | 0.546162 | 0.556832 |
| 0 | 0113 | 0.569302 | 0.047438 | 0.061761 |
| 0 | 0114 | 0.117947 | 0.037708 | 0.229935 |
| 0 | 0115 | 0.366765 | 0.535810 | 0.734051 |
| 0 | 0116 | 0.116606 | 0.429073 | 0.258126 |
| 0 | 0117 | 0.369764 | 0.929251 | 0.757029 |
| 0 | 0118 | 0.867424 | 0.951275 | 0.770518 |
| 0 | 0119 | 0.620903 | 0.451322 | 0.261335 |
| 0 | 0120 | 0.869572 | 0.561573 | 0.740063 |
| 0 | 0121 | 0.613632 | 0.060589 | 0.246376 |
| 0 | 0122 | 0.075451 | 0.944749 | 0.353661 |
| 0 | 0123 | 0.410378 | 0.444006 | 0.858167 |
| 0 | 0124 | 0.085992 | 0.549339 | 0.324300 |
| 0 | 0125 | 0.402012 | 0.049620 | 0.819879 |
| 0 | 0126 | 0.910548 | 0.043128 | 0.644732 |
| 0 | 0127 | 0.572853 | 0.542313 | 0.136739 |
| 0 | 0128 | 0.902544 | 0.441482 | 0.675863 |
| 0 | 0129 | 0.582506 | 0.941323 | 0.176452 |
| 0 | 0130 | 0.197195 | 0.127625 | 0.152557 |
| 0 | 0131 | 0.292705 | 0.628579 | 0.654247 |
| 0 | 0132 | 0.186772 | 0.369042 | 0.120928 |
| 0 | 0133 | 0.301953 | 0.869758 | 0.617740 |
| 0 | 0134 | 0.787802 | 0.861466 | 0.847921 |
| 0 | 0135 | 0.701894 | 0.367643 | 0.348357 |
| 0 | 0136 | 0.800573 | 0.621768 | 0.878982 |
| 0 | 0137 | 0.683512 | 0.128418 | 0.375094 |
| 0 | 0138 | 0.492459 | 0.848136 | 0.215925 |
| 0 | 0139 | 0.993406 | 0.349338 | 0.717161 |

|   |      |          |          |          |
|---|------|----------|----------|----------|
| 0 | 0140 | 0.488720 | 0.631800 | 0.205969 |
| 0 | 0141 | 0.996039 | 0.133882 | 0.708380 |
| 0 | 0142 | 0.493198 | 0.141542 | 0.784391 |
| 0 | 0143 | 0.995937 | 0.642920 | 0.289106 |
| 0 | 0144 | 0.496426 | 0.355063 | 0.791124 |
| 0 | 0145 | 0.989007 | 0.853924 | 0.294285 |
| 0 | 0146 | 0.370052 | 0.837848 | 0.272467 |
| 0 | 0147 | 0.115063 | 0.338584 | 0.776830 |
| 0 | 0148 | 0.375165 | 0.655335 | 0.291254 |
| 0 | 0149 | 0.112164 | 0.152680 | 0.789155 |
| 0 | 0150 | 0.614919 | 0.152188 | 0.724079 |
| 0 | 0151 | 0.879987 | 0.650140 | 0.212730 |
| 0 | 0152 | 0.610539 | 0.332433 | 0.704926 |
| 0 | 0153 | 0.873853 | 0.836791 | 0.210400 |
| 0 | 0154 | 0.422061 | 0.742110 | 0.160820 |
| 0 | 0155 | 0.064038 | 0.242925 | 0.664277 |
| 0 | 0156 | 0.564430 | 0.246799 | 0.838595 |
| 0 | 0157 | 0.918775 | 0.745879 | 0.337451 |
| 0 | 0158 | 0.299649 | 0.827081 | 0.431789 |
| 0 | 0159 | 0.187441 | 0.328333 | 0.934050 |
| 0 | 0160 | 0.309718 | 0.642941 | 0.459543 |
| 0 | 0161 | 0.177245 | 0.143564 | 0.958241 |
| 0 | 0162 | 0.686462 | 0.163441 | 0.565312 |
| 0 | 0163 | 0.797336 | 0.661975 | 0.066955 |
| 0 | 0164 | 0.680192 | 0.353560 | 0.541601 |
| 0 | 0165 | 0.807420 | 0.845870 | 0.042573 |
| 0 | 0166 | 0.241807 | 0.863758 | 0.263553 |
| 0 | 0167 | 0.243176 | 0.363331 | 0.763373 |
| 0 | 0168 | 0.244724 | 0.671264 | 0.296046 |
| 0 | 0169 | 0.242528 | 0.171189 | 0.794439 |
| 0 | 0170 | 0.743545 | 0.128714 | 0.735439 |
| 0 | 0171 | 0.754721 | 0.622815 | 0.245839 |
| 0 | 0172 | 0.741260 | 0.315843 | 0.704325 |
| 0 | 0173 | 0.743434 | 0.818541 | 0.207767 |
| 0 | 0174 | 0.272884 | 0.744844 | 0.576866 |
| 0 | 0175 | 0.215169 | 0.244379 | 0.076720 |
| 0 | 0176 | 0.715847 | 0.250290 | 0.426747 |
| 0 | 0177 | 0.768900 | 0.745080 | 0.923031 |
| 0 | 0178 | 0.188093 | 0.841228 | 0.530005 |
| 0 | 0179 | 0.299870 | 0.340408 | 0.029676 |
| 0 | 0180 | 0.189877 | 0.645372 | 0.535701 |
| 0 | 0181 | 0.298000 | 0.145489 | 0.029667 |
| 0 | 0182 | 0.797641 | 0.149639 | 0.466515 |
| 0 | 0183 | 0.685822 | 0.647277 | 0.967502 |

|    |       |          |          |          |
|----|-------|----------|----------|----------|
| O  | O184  | 0.801645 | 0.346246 | 0.471704 |
| O  | O185  | 0.686694 | 0.844450 | 0.970190 |
| O  | O186  | 0.105649 | 0.742785 | 0.580808 |
| O  | O187  | 0.382233 | 0.241392 | 0.079613 |
| O  | O188  | 0.882811 | 0.246822 | 0.422654 |
| O  | O189  | 0.604104 | 0.747100 | 0.920492 |
| O  | O190  | 0.073593 | 0.826660 | 0.438008 |
| O  | O191  | 0.414447 | 0.325116 | 0.937882 |
| O  | O192  | 0.080471 | 0.659546 | 0.433458 |
| O  | O193  | 0.409482 | 0.158823 | 0.931240 |
| O  | O194  | 0.908849 | 0.163501 | 0.568163 |
| O  | O195  | 0.570772 | 0.662413 | 0.060762 |
| O  | O196  | 0.914879 | 0.332690 | 0.564632 |
| O  | O197  | 0.574641 | 0.831242 | 0.067163 |
| O  | O198  | 0.114148 | 0.838430 | 0.251017 |
| O  | O199  | 0.371022 | 0.339138 | 0.752623 |
| O  | O200  | 0.119284 | 0.664805 | 0.244974 |
| O  | O201  | 0.368687 | 0.165934 | 0.743857 |
| O  | O202  | 0.871850 | 0.145448 | 0.755567 |
| O  | O203  | 0.614690 | 0.645012 | 0.245713 |
| O  | O204  | 0.868163 | 0.324312 | 0.748651 |
| O  | O205  | 0.617178 | 0.826418 | 0.254344 |
| O  | O206  | 0.198024 | 0.755544 | 0.165933 |
| O  | O207  | 0.288890 | 0.256092 | 0.665196 |
| O  | O208  | 0.791691 | 0.234426 | 0.834488 |
| O  | O209  | 0.694706 | 0.739963 | 0.346788 |
| O  | O210  | 0.726168 | 0.716256 | 0.597680 |
| Al | Al211 | 0.688156 | 0.656910 | 0.305879 |
| Si | Si212 | 0.413505 | 0.048243 | 0.182145 |
| Si | Si213 | 0.071241 | 0.549133 | 0.682762 |
| Si | Si214 | 0.423098 | 0.439410 | 0.172082 |
| Si | Si215 | 0.063479 | 0.940743 | 0.670737 |
| Si | Si216 | 0.570386 | 0.940957 | 0.819445 |
| Si | Si217 | 0.916085 | 0.440019 | 0.316273 |
| Si | Si218 | 0.563404 | 0.549285 | 0.828004 |
| Si | Si219 | 0.922666 | 0.048440 | 0.332403 |
| Si | Si220 | 0.310197 | 0.026957 | 0.343330 |
| Si | Si221 | 0.174395 | 0.528129 | 0.844759 |
| Si | Si222 | 0.307644 | 0.471929 | 0.319277 |
| Si | Si223 | 0.179775 | 0.971584 | 0.817709 |
| Si | Si224 | 0.675284 | 0.964345 | 0.659229 |
| Si | Si225 | 0.814851 | 0.462774 | 0.151744 |
| Si | Si226 | 0.679483 | 0.515595 | 0.685259 |
| Si | Si227 | 0.805000 | 0.018392 | 0.185256 |

|    |       |          |          |          |
|----|-------|----------|----------|----------|
| Si | Si228 | 0.271353 | 0.059171 | 0.558361 |
| Si | Si229 | 0.214387 | 0.558570 | 0.058806 |
| Si | Si230 | 0.269700 | 0.437742 | 0.535785 |
| Si | Si231 | 0.216142 | 0.936175 | 0.033986 |
| Si | Si232 | 0.713956 | 0.935632 | 0.444799 |
| Si | Si233 | 0.773747 | 0.430608 | 0.940136 |
| Si | Si234 | 0.717092 | 0.553755 | 0.469272 |
| Si | Si235 | 0.768445 | 0.052896 | 0.969907 |
| Si | Si236 | 0.116884 | 0.057557 | 0.536544 |
| Si | Si237 | 0.368139 | 0.556534 | 0.038249 |
| Si | Si238 | 0.115438 | 0.429305 | 0.539563 |
| Si | Si239 | 0.370550 | 0.928824 | 0.038154 |
| Si | Si240 | 0.868343 | 0.931749 | 0.464288 |
| Si | Si241 | 0.619322 | 0.431599 | 0.960033 |
| Si | Si242 | 0.870916 | 0.558786 | 0.459918 |
| Si | Si243 | 0.613893 | 0.060365 | 0.964305 |
| Si | Si244 | 0.071404 | 0.023277 | 0.324825 |
| Si | Si245 | 0.414387 | 0.522225 | 0.827913 |
| Si | Si246 | 0.066450 | 0.470798 | 0.328103 |
| Si | Si247 | 0.420128 | 0.970886 | 0.826477 |
| Si | Si248 | 0.913988 | 0.964847 | 0.675223 |
| Si | Si249 | 0.571761 | 0.464640 | 0.169178 |
| Si | Si250 | 0.920913 | 0.520367 | 0.671159 |
| Si | Si251 | 0.563671 | 0.019993 | 0.174873 |
| Si | Si252 | 0.192205 | 0.051610 | 0.192730 |
| Si | Si253 | 0.293502 | 0.552569 | 0.695355 |
| Si | Si254 | 0.182929 | 0.434115 | 0.191709 |
| Si | Si255 | 0.303877 | 0.934182 | 0.689717 |
| Si | Si256 | 0.793617 | 0.938174 | 0.810223 |
| Si | Si257 | 0.695070 | 0.441751 | 0.301070 |
| Si | Si258 | 0.804191 | 0.556350 | 0.808878 |
| Si | Si259 | 0.680144 | 0.059606 | 0.312477 |
| Si | Si260 | 0.420349 | 0.821210 | 0.182879 |
| Si | Si261 | 0.065799 | 0.322199 | 0.685988 |
| Si | Si262 | 0.416873 | 0.663777 | 0.188812 |
| Si | Si263 | 0.068830 | 0.164288 | 0.689250 |
| Si | Si264 | 0.565850 | 0.167818 | 0.815519 |
| Si | Si265 | 0.921442 | 0.666918 | 0.311542 |
| Si | Si266 | 0.569426 | 0.324571 | 0.808079 |
| Si | Si267 | 0.915632 | 0.824481 | 0.311564 |
| Si | Si268 | 0.307997 | 0.869242 | 0.330414 |
| Si | Si269 | 0.178144 | 0.369897 | 0.832420 |
| Si | Si270 | 0.306942 | 0.630165 | 0.340596 |
| Si | Si271 | 0.180847 | 0.129574 | 0.839682 |

|    |       |          |          |          |
|----|-------|----------|----------|----------|
| Si | Si272 | 0.678074 | 0.122080 | 0.667310 |
| Si | Si273 | 0.812784 | 0.618854 | 0.166570 |
| Si | Si274 | 0.680138 | 0.359484 | 0.661704 |
| Si | Si275 | 0.804672 | 0.859946 | 0.161328 |
| Si | Si276 | 0.265445 | 0.821067 | 0.539828 |
| Si | Si277 | 0.222501 | 0.321036 | 0.041203 |
| Si | Si278 | 0.266328 | 0.665838 | 0.555350 |
| Si | Si279 | 0.221857 | 0.165618 | 0.053252 |
| Si | Si280 | 0.721019 | 0.172730 | 0.457941 |
| Si | Si281 | 0.763080 | 0.668149 | 0.959623 |
| Si | Si282 | 0.724806 | 0.329159 | 0.447806 |
| Si | Si283 | 0.762827 | 0.823732 | 0.947829 |
| Si | Si284 | 0.111412 | 0.819636 | 0.543695 |
| Si | Si285 | 0.376488 | 0.318523 | 0.043588 |
| Si | Si286 | 0.112721 | 0.666207 | 0.542597 |
| Si | Si287 | 0.375362 | 0.165337 | 0.039390 |
| Si | Si288 | 0.874994 | 0.170143 | 0.459385 |
| Si | Si289 | 0.608993 | 0.669624 | 0.956175 |
| Si | Si290 | 0.878272 | 0.324033 | 0.458685 |
| Si | Si291 | 0.609577 | 0.823378 | 0.959926 |
| Si | Si292 | 0.063280 | 0.866002 | 0.333809 |
| Si | Si293 | 0.422865 | 0.365818 | 0.834499 |
| Si | Si294 | 0.070537 | 0.628787 | 0.323339 |
| Si | Si295 | 0.418203 | 0.128894 | 0.820216 |
| Si | Si296 | 0.921739 | 0.121521 | 0.669325 |
| Si | Si297 | 0.563371 | 0.620931 | 0.164679 |
| Si | Si298 | 0.919538 | 0.362285 | 0.676423 |
| Si | Si299 | 0.566928 | 0.861795 | 0.178138 |
| Si | Si300 | 0.184039 | 0.832664 | 0.194138 |
| Si | Si301 | 0.301685 | 0.333282 | 0.694559 |
| Si | Si302 | 0.192891 | 0.679367 | 0.204842 |
| Si | Si303 | 0.294780 | 0.179957 | 0.703814 |
| Si | Si304 | 0.801221 | 0.156476 | 0.808043 |
| Si | Si305 | 0.795501 | 0.309899 | 0.792817 |
| Si | Si306 | 0.690357 | 0.812867 | 0.298356 |
| Zn | Zn307 | 0.638200 | 0.702424 | 0.502015 |

**TS-C<sub>6</sub>H<sub>9</sub>ZnOH<sub>2</sub>-HTransfer-Concerted-ZnOH<sup>+</sup> (Fig. 9b/TS2 in Blue)**

Total energy = -1951.89755663 eV

data\_

\_audit\_creation\_method 'Materials Studio'  
\_cell\_length\_a 20.357621  
\_cell\_length\_b 20.050598

|                                |     |           |          |          |
|--------------------------------|-----|-----------|----------|----------|
| _cell_length_c                 |     | 13.476578 |          |          |
| _cell_angle_alpha              |     | 90.000000 |          |          |
| _cell_angle_beta               |     | 90.000000 |          |          |
| _cell_angle_gamma              |     | 90.000000 |          |          |
| _symmetry_space_group_name_H-M |     | 'P1'      |          |          |
| loop_                          |     |           |          |          |
| _atom_site_type_symbol         |     |           |          |          |
| _atom_site_label               |     |           |          |          |
| _atom_site_fract_x             |     |           |          |          |
| _atom_site_fract_y             |     |           |          |          |
| _atom_site_fract_z             |     |           |          |          |
| H                              | H1  | 0.738972  | 0.748244 | 0.618882 |
| H                              | H2  | 0.651111  | 0.751584 | 0.661636 |
| H                              | H3  | 0.559994  | 0.784349 | 0.444171 |
| H                              | H4  | 0.563203  | 0.833597 | 0.601335 |
| H                              | H5  | 0.612014  | 0.770275 | 0.670614 |
| H                              | H6  | 0.434633  | 0.682979 | 0.712334 |
| H                              | H7  | 0.488643  | 0.791642 | 0.730914 |
| H                              | H8  | 0.522654  | 0.658998 | 0.423409 |
| H                              | H9  | 0.461157  | 0.716556 | 0.455871 |
| H                              | H10 | 0.533446  | 0.623104 | 0.599039 |
| H                              | H11 | 0.450971  | 0.616641 | 0.561963 |
| C                              | C12 | 0.558211  | 0.747072 | 0.503655 |
| C                              | C13 | 0.550484  | 0.780967 | 0.598929 |
| C                              | C14 | 0.471682  | 0.698772 | 0.659247 |
| C                              | C15 | 0.500789  | 0.758942 | 0.669311 |
| C                              | C16 | 0.506592  | 0.692736 | 0.482469 |
| C                              | C17 | 0.490250  | 0.652659 | 0.576288 |
| O                              | O18 | 0.488630  | 0.030551 | 0.211642 |
| O                              | O19 | 0.994698  | 0.532939 | 0.707454 |
| O                              | O20 | 0.499159  | 0.443064 | 0.205840 |
| O                              | O21 | 0.987608  | 0.943611 | 0.706613 |
| O                              | O22 | 0.494569  | 0.958476 | 0.790078 |
| O                              | O23 | 0.991226  | 0.460254 | 0.291344 |
| O                              | O24 | 0.487424  | 0.544930 | 0.792436 |
| O                              | O25 | 0.997327  | 0.044008 | 0.292614 |
| O                              | O26 | 0.371747  | 0.059863 | 0.283514 |
| O                              | O27 | 0.110690  | 0.558139 | 0.785922 |
| O                              | O28 | 0.377153  | 0.453378 | 0.267956 |
| O                              | O29 | 0.109518  | 0.956814 | 0.766345 |
| O                              | O30 | 0.611640  | 0.932979 | 0.717008 |
| O                              | O31 | 0.876607  | 0.430637 | 0.211491 |
| O                              | O32 | 0.608127  | 0.534538 | 0.727533 |
| O                              | O33 | 0.873561  | 0.035784 | 0.238753 |

|   |     |          |          |          |
|---|-----|----------|----------|----------|
| 0 | 034 | 0.412403 | 0.116470 | 0.116607 |
| 0 | 035 | 0.075195 | 0.618031 | 0.619156 |
| 0 | 036 | 0.409083 | 0.366093 | 0.127120 |
| 0 | 037 | 0.079005 | 0.867174 | 0.628123 |
| 0 | 038 | 0.571980 | 0.872338 | 0.881221 |
| 0 | 039 | 0.914156 | 0.369887 | 0.375890 |
| 0 | 040 | 0.578383 | 0.625142 | 0.862970 |
| 0 | 041 | 0.910486 | 0.121313 | 0.379975 |
| 0 | 042 | 0.379424 | 0.987717 | 0.121458 |
| 0 | 043 | 0.104951 | 0.488559 | 0.620952 |
| 0 | 044 | 0.409781 | 0.496273 | 0.087378 |
| 0 | 045 | 0.074803 | 0.996803 | 0.584997 |
| 0 | 046 | 0.603286 | 0.001564 | 0.882601 |
| 0 | 047 | 0.879188 | 0.497735 | 0.379794 |
| 0 | 048 | 0.578505 | 0.495511 | 0.911270 |
| 0 | 049 | 0.911756 | 0.990718 | 0.415715 |
| 0 | 050 | 0.306959 | 0.063269 | 0.451038 |
| 0 | 051 | 0.176977 | 0.564460 | 0.952491 |
| 0 | 052 | 0.310035 | 0.448692 | 0.433352 |
| 0 | 053 | 0.176500 | 0.945982 | 0.931336 |
| 0 | 054 | 0.678461 | 0.926711 | 0.552208 |
| 0 | 055 | 0.811019 | 0.423956 | 0.044100 |
| 0 | 056 | 0.677022 | 0.533945 | 0.565928 |
| 0 | 057 | 0.808584 | 0.043598 | 0.071409 |
| 0 | 058 | 0.321097 | 0.947695 | 0.356834 |
| 0 | 059 | 0.166497 | 0.448514 | 0.858955 |
| 0 | 060 | 0.295961 | 0.552635 | 0.314303 |
| 0 | 061 | 0.194556 | 0.051697 | 0.816363 |
| 0 | 062 | 0.666032 | 0.043571 | 0.643121 |
| 0 | 063 | 0.826663 | 0.541041 | 0.132027 |
| 0 | 064 | 0.691460 | 0.435154 | 0.694332 |
| 0 | 065 | 0.791207 | 0.938273 | 0.187513 |
| 0 | 066 | 0.241797 | 0.040731 | 0.285099 |
| 0 | 067 | 0.241279 | 0.544862 | 0.785103 |
| 0 | 068 | 0.247767 | 0.435986 | 0.261389 |
| 0 | 069 | 0.238005 | 0.934019 | 0.758682 |
| 0 | 070 | 0.742188 | 0.949034 | 0.718689 |
| 0 | 071 | 0.746685 | 0.449364 | 0.209169 |
| 0 | 072 | 0.737582 | 0.553948 | 0.738375 |
| 0 | 073 | 0.744705 | 0.055544 | 0.241525 |
| 0 | 074 | 0.277055 | 0.131668 | 0.611914 |
| 0 | 075 | 0.211774 | 0.630835 | 0.113310 |
| 0 | 076 | 0.303598 | 0.376009 | 0.591934 |
| 0 | 077 | 0.181676 | 0.874635 | 0.091764 |



|   |      |          |          |          |
|---|------|----------|----------|----------|
| 0 | 078  | 0.706320 | 0.864939 | 0.387037 |
| 0 | 079  | 0.777563 | 0.360424 | 0.881081 |
| 0 | 080  | 0.681042 | 0.620859 | 0.422926 |
| 0 | 081  | 0.798795 | 0.117128 | 0.913208 |
| 0 | 082  | 0.194265 | 0.039531 | 0.544202 |
| 0 | 083  | 0.290422 | 0.536847 | 0.040971 |
| 0 | 084  | 0.192672 | 0.424594 | 0.510255 |
| 0 | 085  | 0.293091 | 0.922418 | 0.010637 |
| 0 | 086  | 0.791027 | 0.952872 | 0.457947 |
| 0 | 087  | 0.696698 | 0.450988 | 0.956982 |
| 0 | 088  | 0.793589 | 0.564891 | 0.491225 |
| 0 | 089  | 0.690576 | 0.064167 | 0.994660 |
| 0 | 090  | 0.306781 | 0.003107 | 0.625380 |
| 0 | 091  | 0.178492 | 0.502777 | 0.125932 |
| 0 | 092  | 0.273984 | 0.504723 | 0.603533 |
| 0 | 093  | 0.210918 | 0.003409 | 0.101363 |
| 0 | 094  | 0.677363 | 0.994151 | 0.384108 |
| 0 | 095  | 0.808260 | 0.489233 | 0.873772 |
| 0 | 096  | 0.710339 | 0.494289 | 0.385850 |
| 0 | 097  | 0.775189 | 0.987379 | 0.900486 |
| 0 | 098  | 0.102577 | 0.126966 | 0.595398 |
| 0 | 099  | 0.378676 | 0.625878 | 0.098434 |
| 0 | 0100 | 0.091458 | 0.359066 | 0.585633 |
| 0 | 0101 | 0.397317 | 0.859269 | 0.081554 |
| 0 | 0102 | 0.879974 | 0.861810 | 0.404656 |
| 0 | 0103 | 0.606181 | 0.365686 | 0.894658 |
| 0 | 0104 | 0.893512 | 0.628039 | 0.406680 |
| 0 | 0105 | 0.590324 | 0.130906 | 0.916372 |
| 0 | 0106 | 0.094688 | 0.066396 | 0.421408 |
| 0 | 0107 | 0.391875 | 0.566591 | 0.924031 |
| 0 | 0108 | 0.071748 | 0.444817 | 0.441931 |
| 0 | 0109 | 0.413204 | 0.947888 | 0.941103 |
| 0 | 0110 | 0.889508 | 0.921604 | 0.579364 |
| 0 | 0111 | 0.593216 | 0.421166 | 0.071069 |
| 0 | 0112 | 0.915104 | 0.545727 | 0.555121 |
| 0 | 0113 | 0.569009 | 0.046002 | 0.060794 |
| 0 | 0114 | 0.117898 | 0.038351 | 0.230229 |
| 0 | 0115 | 0.366365 | 0.536167 | 0.734571 |
| 0 | 0116 | 0.116589 | 0.429422 | 0.258029 |
| 0 | 0117 | 0.369327 | 0.929861 | 0.757385 |
| 0 | 0118 | 0.867016 | 0.952876 | 0.769480 |
| 0 | 0119 | 0.621250 | 0.450683 | 0.259415 |
| 0 | 0120 | 0.868755 | 0.561607 | 0.738745 |
| 0 | 0121 | 0.613667 | 0.060576 | 0.245174 |

|   |      |          |          |          |
|---|------|----------|----------|----------|
| 0 | 0122 | 0.075783 | 0.944980 | 0.353416 |
| 0 | 0123 | 0.412082 | 0.444747 | 0.857753 |
| 0 | 0124 | 0.085874 | 0.549445 | 0.324603 |
| 0 | 0125 | 0.402000 | 0.050493 | 0.819131 |
| 0 | 0126 | 0.911497 | 0.043586 | 0.643522 |
| 0 | 0127 | 0.573022 | 0.542618 | 0.136970 |
| 0 | 0128 | 0.902340 | 0.441555 | 0.675001 |
| 0 | 0129 | 0.582434 | 0.940861 | 0.177288 |
| 0 | 0130 | 0.197086 | 0.128232 | 0.152746 |
| 0 | 0131 | 0.293346 | 0.629168 | 0.654161 |
| 0 | 0132 | 0.186937 | 0.369815 | 0.120410 |
| 0 | 0133 | 0.302153 | 0.870149 | 0.617906 |
| 0 | 0134 | 0.789458 | 0.862270 | 0.848986 |
| 0 | 0135 | 0.701363 | 0.366126 | 0.346075 |
| 0 | 0136 | 0.798754 | 0.622200 | 0.876403 |
| 0 | 0137 | 0.682819 | 0.126519 | 0.377141 |
| 0 | 0138 | 0.492941 | 0.847060 | 0.215919 |
| 0 | 0139 | 0.992840 | 0.349094 | 0.715790 |
| 0 | 0140 | 0.489032 | 0.632771 | 0.204307 |
| 0 | 0141 | 0.995761 | 0.134992 | 0.708639 |
| 0 | 0142 | 0.492975 | 0.142924 | 0.784247 |
| 0 | 0143 | 0.996842 | 0.643780 | 0.287475 |
| 0 | 0144 | 0.495833 | 0.354192 | 0.789075 |
| 0 | 0145 | 0.989152 | 0.854066 | 0.294822 |
| 0 | 0146 | 0.370393 | 0.838590 | 0.272268 |
| 0 | 0147 | 0.113887 | 0.339758 | 0.777893 |
| 0 | 0148 | 0.376287 | 0.655638 | 0.291841 |
| 0 | 0149 | 0.111951 | 0.152513 | 0.789590 |
| 0 | 0150 | 0.614913 | 0.152067 | 0.724979 |
| 0 | 0151 | 0.880844 | 0.649576 | 0.210593 |
| 0 | 0152 | 0.610208 | 0.332009 | 0.703341 |
| 0 | 0153 | 0.874226 | 0.837603 | 0.210063 |
| 0 | 0154 | 0.420975 | 0.742475 | 0.159768 |
| 0 | 0155 | 0.064995 | 0.243296 | 0.664622 |
| 0 | 0156 | 0.565270 | 0.247430 | 0.839281 |
| 0 | 0157 | 0.918787 | 0.745693 | 0.335505 |
| 0 | 0158 | 0.300129 | 0.827718 | 0.431761 |
| 0 | 0159 | 0.187504 | 0.328475 | 0.933691 |
| 0 | 0160 | 0.310775 | 0.643479 | 0.459728 |
| 0 | 0161 | 0.177386 | 0.144175 | 0.958432 |
| 0 | 0162 | 0.686852 | 0.163168 | 0.566349 |
| 0 | 0163 | 0.798425 | 0.661088 | 0.064487 |
| 0 | 0164 | 0.679259 | 0.351661 | 0.539397 |
| 0 | 0165 | 0.806552 | 0.846670 | 0.043444 |

|   |      |          |          |          |
|---|------|----------|----------|----------|
| 0 | 0166 | 0.242082 | 0.864171 | 0.263441 |
| 0 | 0167 | 0.241960 | 0.363821 | 0.762118 |
| 0 | 0168 | 0.245920 | 0.672199 | 0.295838 |
| 0 | 0169 | 0.242181 | 0.171860 | 0.794211 |
| 0 | 0170 | 0.743352 | 0.128239 | 0.736897 |
| 0 | 0171 | 0.755335 | 0.623150 | 0.243233 |
| 0 | 0172 | 0.740816 | 0.314853 | 0.702567 |
| 0 | 0173 | 0.744125 | 0.817472 | 0.209480 |
| 0 | 0174 | 0.273681 | 0.745333 | 0.576755 |
| 0 | 0175 | 0.215353 | 0.244992 | 0.076914 |
| 0 | 0176 | 0.715392 | 0.248858 | 0.425069 |
| 0 | 0177 | 0.768973 | 0.745733 | 0.923905 |
| 0 | 0178 | 0.188431 | 0.841486 | 0.529708 |
| 0 | 0179 | 0.299953 | 0.340879 | 0.028975 |
| 0 | 0180 | 0.190520 | 0.645922 | 0.534989 |
| 0 | 0181 | 0.298073 | 0.145880 | 0.030255 |
| 0 | 0182 | 0.797549 | 0.148990 | 0.466433 |
| 0 | 0183 | 0.685256 | 0.648688 | 0.969150 |
| 0 | 0184 | 0.800881 | 0.345310 | 0.470035 |
| 0 | 0185 | 0.686674 | 0.845487 | 0.968316 |
| 0 | 0186 | 0.106316 | 0.743027 | 0.580865 |
| 0 | 0187 | 0.382298 | 0.241955 | 0.079411 |
| 0 | 0188 | 0.882534 | 0.246477 | 0.421639 |
| 0 | 0189 | 0.603622 | 0.748041 | 0.918740 |
| 0 | 0190 | 0.073430 | 0.827401 | 0.439142 |
| 0 | 0191 | 0.414728 | 0.325861 | 0.937745 |
| 0 | 0192 | 0.080805 | 0.659834 | 0.433297 |
| 0 | 0193 | 0.409370 | 0.159193 | 0.931389 |
| 0 | 0194 | 0.908578 | 0.164046 | 0.568060 |
| 0 | 0195 | 0.566501 | 0.659960 | 0.052338 |
| 0 | 0196 | 0.914026 | 0.332631 | 0.563628 |
| 0 | 0197 | 0.575655 | 0.830843 | 0.067337 |
| 0 | 0198 | 0.114457 | 0.838098 | 0.252299 |
| 0 | 0199 | 0.369933 | 0.340348 | 0.753430 |
| 0 | 0200 | 0.120417 | 0.664599 | 0.245380 |
| 0 | 0201 | 0.368388 | 0.166860 | 0.744036 |
| 0 | 0202 | 0.871577 | 0.145131 | 0.755526 |
| 0 | 0203 | 0.615807 | 0.649612 | 0.235124 |
| 0 | 0204 | 0.867651 | 0.324506 | 0.747763 |
| 0 | 0205 | 0.617509 | 0.826045 | 0.254869 |
| 0 | 0206 | 0.198380 | 0.755953 | 0.165825 |
| 0 | 0207 | 0.288702 | 0.256726 | 0.664896 |
| 0 | 0208 | 0.791624 | 0.234706 | 0.834162 |
| 0 | 0209 | 0.694032 | 0.738908 | 0.347765 |

|    |       |          |          |          |
|----|-------|----------|----------|----------|
| O  | O210  | 0.703030 | 0.716621 | 0.616352 |
| Al | Al211 | 0.687593 | 0.655941 | 0.301100 |
| Si | Si212 | 0.413513 | 0.048806 | 0.182307 |
| Si | Si213 | 0.070802 | 0.549372 | 0.682406 |
| Si | Si214 | 0.423141 | 0.439799 | 0.171871 |
| Si | Si215 | 0.063516 | 0.941007 | 0.671182 |
| Si | Si216 | 0.570029 | 0.941528 | 0.819227 |
| Si | Si217 | 0.915724 | 0.439840 | 0.315338 |
| Si | Si218 | 0.563941 | 0.549958 | 0.824745 |
| Si | Si219 | 0.922321 | 0.048223 | 0.331840 |
| Si | Si220 | 0.310281 | 0.027573 | 0.343321 |
| Si | Si221 | 0.173842 | 0.528655 | 0.844751 |
| Si | Si222 | 0.307726 | 0.472527 | 0.318912 |
| Si | Si223 | 0.179623 | 0.972087 | 0.818055 |
| Si | Si224 | 0.674721 | 0.963863 | 0.659101 |
| Si | Si225 | 0.815128 | 0.462017 | 0.150292 |
| Si | Si226 | 0.679121 | 0.514832 | 0.681869 |
| Si | Si227 | 0.804634 | 0.018209 | 0.185093 |
| Si | Si228 | 0.271153 | 0.059724 | 0.558281 |
| Si | Si229 | 0.214334 | 0.559045 | 0.058498 |
| Si | Si230 | 0.269676 | 0.438330 | 0.535349 |
| Si | Si231 | 0.215850 | 0.936515 | 0.034493 |
| Si | Si232 | 0.713581 | 0.934930 | 0.444582 |
| Si | Si233 | 0.773347 | 0.431067 | 0.938703 |
| Si | Si234 | 0.716053 | 0.553880 | 0.465901 |
| Si | Si235 | 0.768040 | 0.053149 | 0.969325 |
| Si | Si236 | 0.116617 | 0.057763 | 0.536574 |
| Si | Si237 | 0.367844 | 0.556694 | 0.038222 |
| Si | Si238 | 0.115457 | 0.429641 | 0.539538 |
| Si | Si239 | 0.370322 | 0.929604 | 0.038505 |
| Si | Si240 | 0.868028 | 0.931302 | 0.464046 |
| Si | Si241 | 0.618904 | 0.433117 | 0.958435 |
| Si | Si242 | 0.869937 | 0.558992 | 0.457783 |
| Si | Si243 | 0.613645 | 0.060591 | 0.963888 |
| Si | Si244 | 0.071224 | 0.023508 | 0.324833 |
| Si | Si245 | 0.414663 | 0.523051 | 0.827913 |
| Si | Si246 | 0.066242 | 0.470924 | 0.328148 |
| Si | Si247 | 0.419717 | 0.971778 | 0.826520 |
| Si | Si248 | 0.914086 | 0.965355 | 0.674534 |
| Si | Si249 | 0.571733 | 0.464803 | 0.168174 |
| Si | Si250 | 0.919997 | 0.520636 | 0.669578 |
| Si | Si251 | 0.563574 | 0.019537 | 0.174438 |
| Si | Si252 | 0.192108 | 0.052194 | 0.192839 |
| Si | Si253 | 0.293239 | 0.553019 | 0.695201 |

|    |       |          |          |          |
|----|-------|----------|----------|----------|
| Si | Si254 | 0.182775 | 0.434794 | 0.191355 |
| Si | Si255 | 0.303503 | 0.934715 | 0.689750 |
| Si | Si256 | 0.793476 | 0.938416 | 0.809236 |
| Si | Si257 | 0.695284 | 0.440590 | 0.299599 |
| Si | Si258 | 0.803122 | 0.556573 | 0.807037 |
| Si | Si259 | 0.680009 | 0.058960 | 0.311707 |
| Si | Si260 | 0.420408 | 0.821504 | 0.182505 |
| Si | Si261 | 0.065646 | 0.322617 | 0.686044 |
| Si | Si262 | 0.416829 | 0.664149 | 0.188277 |
| Si | Si263 | 0.068825 | 0.164629 | 0.689594 |
| Si | Si264 | 0.565788 | 0.168438 | 0.816063 |
| Si | Si265 | 0.921930 | 0.666742 | 0.309701 |
| Si | Si266 | 0.569290 | 0.324944 | 0.806674 |
| Si | Si267 | 0.915737 | 0.824423 | 0.311342 |
| Si | Si268 | 0.308234 | 0.869855 | 0.330246 |
| Si | Si269 | 0.177591 | 0.370453 | 0.832569 |
| Si | Si270 | 0.307768 | 0.630730 | 0.340686 |
| Si | Si271 | 0.180839 | 0.129971 | 0.839956 |
| Si | Si272 | 0.678091 | 0.121848 | 0.668365 |
| Si | Si273 | 0.813622 | 0.618388 | 0.164341 |
| Si | Si274 | 0.679844 | 0.358545 | 0.659338 |
| Si | Si275 | 0.804572 | 0.860075 | 0.162134 |
| Si | Si276 | 0.265752 | 0.821557 | 0.539650 |
| Si | Si277 | 0.222583 | 0.321560 | 0.040905 |
| Si | Si278 | 0.266865 | 0.666325 | 0.555087 |
| Si | Si279 | 0.221917 | 0.166196 | 0.053532 |
| Si | Si280 | 0.720824 | 0.171739 | 0.458358 |
| Si | Si281 | 0.762748 | 0.668542 | 0.958348 |
| Si | Si282 | 0.724186 | 0.327838 | 0.445729 |
| Si | Si283 | 0.763001 | 0.824312 | 0.947535 |
| Si | Si284 | 0.111732 | 0.819997 | 0.544280 |
| Si | Si285 | 0.376552 | 0.319047 | 0.043267 |
| Si | Si286 | 0.113193 | 0.666514 | 0.542310 |
| Si | Si287 | 0.375419 | 0.165814 | 0.039640 |
| Si | Si288 | 0.874800 | 0.169961 | 0.459083 |
| Si | Si289 | 0.608783 | 0.670121 | 0.951766 |
| Si | Si290 | 0.877696 | 0.323732 | 0.457526 |
| Si | Si291 | 0.609736 | 0.823921 | 0.959139 |
| Si | Si292 | 0.063349 | 0.866191 | 0.334428 |
| Si | Si293 | 0.422930 | 0.366268 | 0.834059 |
| Si | Si294 | 0.070940 | 0.629002 | 0.323117 |
| Si | Si295 | 0.418074 | 0.129827 | 0.820088 |
| Si | Si296 | 0.921681 | 0.121973 | 0.669098 |
| Si | Si297 | 0.562778 | 0.621785 | 0.159354 |

|    |       |          |          |          |
|----|-------|----------|----------|----------|
| Si | Si298 | 0.918964 | 0.362364 | 0.675309 |
| Si | Si299 | 0.567306 | 0.861285 | 0.178154 |
| Si | Si300 | 0.184054 | 0.832937 | 0.194571 |
| Si | Si301 | 0.301053 | 0.333972 | 0.694338 |
| Si | Si302 | 0.193721 | 0.679756 | 0.204866 |
| Si | Si303 | 0.294500 | 0.180632 | 0.703720 |
| Si | Si304 | 0.801230 | 0.156634 | 0.808663 |
| Si | Si305 | 0.794898 | 0.310009 | 0.791496 |
| Si | Si306 | 0.690520 | 0.812390 | 0.298937 |
| Zn | Zn307 | 0.652271 | 0.710882 | 0.493755 |

**C<sub>6</sub>H<sub>8</sub>-Phys.Ads-H<sub>2</sub>-Phys.Ads-ZnOH<sup>+</sup> (Fig. 9b/M3 in Blue)**

Total energy = -1953.15608577 eV

data\_

\_audit\_creation\_method 'Materials Studio'

\_cell\_length\_a 20.357621

\_cell\_length\_b 20.050598

\_cell\_length\_c 13.476578

\_cell\_angle\_alpha 90.000000

\_cell\_angle\_beta 90.000000

\_cell\_angle\_gamma 90.000000

\_symmetry\_space\_group\_name\_H-M 'P1'

loop\_

\_atom\_site\_type\_symbol

\_atom\_site\_label

\_atom\_site\_fract\_x

\_atom\_site\_fract\_y

\_atom\_site\_fract\_z

|   |     |          |          |          |
|---|-----|----------|----------|----------|
| H | H1  | 0.750761 | 0.784989 | 0.631792 |
| H | H2  | 0.606206 | 0.787522 | 0.677654 |
| H | H3  | 0.524655 | 0.786819 | 0.634555 |
| H | H4  | 0.616686 | 0.667688 | 0.667989 |
| H | H5  | 0.540987 | 0.682801 | 0.724976 |
| H | H6  | 0.511855 | 0.600504 | 0.596006 |
| H | H7  | 0.519900 | 0.633618 | 0.420000 |
| H | H8  | 0.581453 | 0.735452 | 0.372063 |
| H | H9  | 0.610509 | 0.820328 | 0.496320 |
| H | H10 | 0.488333 | 0.500877 | 0.467328 |
| H | H11 | 0.514854 | 0.493934 | 0.431377 |
| C | C12 | 0.572857 | 0.762165 | 0.626664 |
| C | C13 | 0.567143 | 0.688224 | 0.654636 |
| C | C14 | 0.535274 | 0.647075 | 0.574860 |
| C | C15 | 0.539795 | 0.664702 | 0.478433 |

|   |     |          |          |          |
|---|-----|----------|----------|----------|
| C | C16 | 0.574072 | 0.725422 | 0.450460 |
| C | C17 | 0.593760 | 0.771264 | 0.520056 |
| O | O18 | 0.521273 | 0.033338 | 0.217485 |
| O | O19 | 0.021738 | 0.540248 | 0.719313 |
| O | O20 | 0.526141 | 0.438696 | 0.219503 |
| O | O21 | 0.013585 | 0.932398 | 0.707415 |
| O | O22 | 0.516119 | 0.943346 | 0.789988 |
| O | O23 | 0.019185 | 0.457865 | 0.297837 |
| O | O24 | 0.517749 | 0.536526 | 0.796804 |
| O | O25 | 0.022207 | 0.035129 | 0.295577 |
| O | O26 | 0.404022 | 0.056860 | 0.293448 |
| O | O27 | 0.140579 | 0.556895 | 0.789361 |
| O | O28 | 0.402850 | 0.430145 | 0.280190 |
| O | O29 | 0.129593 | 0.940363 | 0.791755 |
| O | O30 | 0.630155 | 0.947454 | 0.703229 |
| O | O31 | 0.901299 | 0.435525 | 0.224908 |
| O | O32 | 0.638112 | 0.524616 | 0.739270 |
| O | O33 | 0.905599 | 0.045897 | 0.215058 |
| O | O34 | 0.440808 | 0.119273 | 0.129049 |
| O | O35 | 0.104194 | 0.621470 | 0.627335 |
| O | O36 | 0.444263 | 0.360858 | 0.123521 |
| O | O37 | 0.113221 | 0.863207 | 0.634155 |
| O | O38 | 0.611294 | 0.861304 | 0.848463 |
| O | O39 | 0.941201 | 0.371516 | 0.386119 |
| O | O40 | 0.606721 | 0.614266 | 0.876779 |
| O | O41 | 0.936820 | 0.120080 | 0.372949 |
| O | O42 | 0.414238 | 0.990278 | 0.125283 |
| O | O43 | 0.124263 | 0.490793 | 0.620928 |
| O | O44 | 0.432717 | 0.492218 | 0.110423 |
| O | O45 | 0.110230 | 0.994344 | 0.613218 |
| O | O46 | 0.619602 | 0.990591 | 0.889365 |
| O | O47 | 0.912016 | 0.501103 | 0.394049 |
| O | O48 | 0.603779 | 0.484009 | 0.920741 |
| O | O49 | 0.917796 | 0.989837 | 0.392946 |
| O | O50 | 0.340854 | 0.037855 | 0.461447 |
| O | O51 | 0.200976 | 0.538534 | 0.958730 |
| O | O52 | 0.342238 | 0.449035 | 0.452238 |
| O | O53 | 0.198094 | 0.949288 | 0.956373 |
| O | O54 | 0.695476 | 0.935060 | 0.538111 |
| O | O55 | 0.835606 | 0.422283 | 0.058571 |
| O | O56 | 0.706454 | 0.543587 | 0.579186 |
| O | O57 | 0.840122 | 0.035316 | 0.045192 |
| O | O58 | 0.338294 | 0.944771 | 0.319043 |
| O | O59 | 0.205923 | 0.444755 | 0.817129 |

|   |      |          |          |          |
|---|------|----------|----------|----------|
| 0 | 060  | 0.336242 | 0.541488 | 0.309546 |
| 0 | 061  | 0.210733 | 0.042558 | 0.814933 |
| 0 | 062  | 0.714021 | 0.043216 | 0.651941 |
| 0 | 063  | 0.850802 | 0.542845 | 0.134333 |
| 0 | 064  | 0.729738 | 0.436455 | 0.691199 |
| 0 | 065  | 0.833658 | 0.937981 | 0.179237 |
| 0 | 066  | 0.272545 | 0.056943 | 0.297322 |
| 0 | 067  | 0.271310 | 0.557327 | 0.796065 |
| 0 | 068  | 0.272217 | 0.427815 | 0.290680 |
| 0 | 069  | 0.259088 | 0.922757 | 0.786039 |
| 0 | 070  | 0.759585 | 0.925895 | 0.707627 |
| 0 | 071  | 0.771915 | 0.455744 | 0.221810 |
| 0 | 072  | 0.764197 | 0.555293 | 0.755195 |
| 0 | 073  | 0.775739 | 0.054252 | 0.212873 |
| 0 | 074  | 0.313637 | 0.118373 | 0.610647 |
| 0 | 075  | 0.231066 | 0.617610 | 0.108696 |
| 0 | 076  | 0.318317 | 0.369741 | 0.603987 |
| 0 | 077  | 0.222440 | 0.868877 | 0.107577 |
| 0 | 078  | 0.713945 | 0.873600 | 0.368871 |
| 0 | 079  | 0.809506 | 0.352483 | 0.897865 |
| 0 | 080  | 0.714781 | 0.630261 | 0.434466 |
| 0 | 081  | 0.811654 | 0.116974 | 0.897236 |
| 0 | 082  | 0.220387 | 0.040192 | 0.534595 |
| 0 | 083  | 0.319346 | 0.532490 | 0.038298 |
| 0 | 084  | 0.220125 | 0.435262 | 0.516404 |
| 0 | 085  | 0.319490 | 0.935761 | 0.019466 |
| 0 | 086  | 0.815734 | 0.925919 | 0.467122 |
| 0 | 087  | 0.722263 | 0.440176 | 0.964119 |
| 0 | 088  | 0.823479 | 0.567001 | 0.500536 |
| 0 | 089  | 0.716674 | 0.049091 | 0.987583 |
| 0 | 090  | 0.318220 | 0.988005 | 0.638936 |
| 0 | 091  | 0.215629 | 0.487595 | 0.136955 |
| 0 | 092  | 0.306063 | 0.500393 | 0.625515 |
| 0 | 093  | 0.231895 | 0.999194 | 0.131196 |
| 0 | 094  | 0.728309 | 0.004430 | 0.379865 |
| 0 | 095  | 0.833397 | 0.482164 | 0.882853 |
| 0 | 096  | 0.734085 | 0.501816 | 0.397805 |
| 0 | 097  | 0.800237 | 0.987331 | 0.870576 |
| 0 | 098  | 0.131033 | 0.125016 | 0.603477 |
| 0 | 099  | 0.406311 | 0.622071 | 0.102334 |
| 0 | 0100 | 0.130545 | 0.358802 | 0.601597 |
| 0 | 0101 | 0.413043 | 0.859523 | 0.096865 |
| 0 | 0102 | 0.912241 | 0.856426 | 0.387286 |
| 0 | 0103 | 0.628788 | 0.353529 | 0.913563 |



|   |      |          |          |          |
|---|------|----------|----------|----------|
| 0 | 0104 | 0.918583 | 0.633416 | 0.407190 |
| 0 | 0105 | 0.624656 | 0.122948 | 0.901272 |
| 0 | 0106 | 0.106792 | 0.056909 | 0.440951 |
| 0 | 0107 | 0.429115 | 0.555274 | 0.938219 |
| 0 | 0108 | 0.097795 | 0.433682 | 0.448889 |
| 0 | 0109 | 0.441449 | 0.940131 | 0.949141 |
| 0 | 0110 | 0.930849 | 0.917556 | 0.557051 |
| 0 | 0111 | 0.621297 | 0.415981 | 0.086151 |
| 0 | 0112 | 0.945635 | 0.559998 | 0.563819 |
| 0 | 0113 | 0.596354 | 0.051103 | 0.060222 |
| 0 | 0114 | 0.145710 | 0.057611 | 0.252291 |
| 0 | 0115 | 0.396646 | 0.548534 | 0.746861 |
| 0 | 0116 | 0.142662 | 0.420717 | 0.264740 |
| 0 | 0117 | 0.389343 | 0.922398 | 0.770697 |
| 0 | 0118 | 0.887221 | 0.946132 | 0.738970 |
| 0 | 0119 | 0.647108 | 0.453534 | 0.272672 |
| 0 | 0120 | 0.894603 | 0.552353 | 0.745952 |
| 0 | 0121 | 0.647191 | 0.054109 | 0.242976 |
| 0 | 0122 | 0.114215 | 0.944366 | 0.338718 |
| 0 | 0123 | 0.433278 | 0.439632 | 0.844014 |
| 0 | 0124 | 0.118270 | 0.540698 | 0.337030 |
| 0 | 0125 | 0.431153 | 0.041960 | 0.824616 |
| 0 | 0126 | 0.950217 | 0.036656 | 0.631479 |
| 0 | 0127 | 0.595600 | 0.538904 | 0.141485 |
| 0 | 0128 | 0.941766 | 0.444486 | 0.655187 |
| 0 | 0129 | 0.608785 | 0.939917 | 0.165745 |
| 0 | 0130 | 0.227211 | 0.130869 | 0.150407 |
| 0 | 0131 | 0.320613 | 0.630650 | 0.650315 |
| 0 | 0132 | 0.222581 | 0.354377 | 0.148035 |
| 0 | 0133 | 0.318156 | 0.854896 | 0.644814 |
| 0 | 0134 | 0.821446 | 0.858511 | 0.845582 |
| 0 | 0135 | 0.730693 | 0.372457 | 0.360492 |
| 0 | 0136 | 0.834701 | 0.615155 | 0.891336 |
| 0 | 0137 | 0.721508 | 0.133252 | 0.348593 |
| 0 | 0138 | 0.523876 | 0.842487 | 0.202002 |
| 0 | 0139 | 0.025387 | 0.351223 | 0.719188 |
| 0 | 0140 | 0.518124 | 0.635638 | 0.206031 |
| 0 | 0141 | 0.020691 | 0.134968 | 0.710635 |
| 0 | 0142 | 0.520522 | 0.134823 | 0.782482 |
| 0 | 0143 | 0.024243 | 0.627628 | 0.290948 |
| 0 | 0144 | 0.525490 | 0.351099 | 0.791650 |
| 0 | 0145 | 0.024015 | 0.856228 | 0.284353 |
| 0 | 0146 | 0.409801 | 0.835215 | 0.290842 |
| 0 | 0147 | 0.143716 | 0.329780 | 0.792708 |

|   |      |          |          |          |
|---|------|----------|----------|----------|
| 0 | 0148 | 0.405135 | 0.652980 | 0.294411 |
| 0 | 0149 | 0.135526 | 0.150603 | 0.796764 |
| 0 | 0150 | 0.638390 | 0.145367 | 0.707601 |
| 0 | 0151 | 0.911243 | 0.648178 | 0.209966 |
| 0 | 0152 | 0.643848 | 0.337530 | 0.718117 |
| 0 | 0153 | 0.911138 | 0.831171 | 0.195091 |
| 0 | 0154 | 0.444426 | 0.740976 | 0.160372 |
| 0 | 0155 | 0.092202 | 0.241963 | 0.668445 |
| 0 | 0156 | 0.594007 | 0.240460 | 0.829217 |
| 0 | 0157 | 0.962615 | 0.743085 | 0.323234 |
| 0 | 0158 | 0.338960 | 0.848040 | 0.452103 |
| 0 | 0159 | 0.211641 | 0.350559 | 0.954631 |
| 0 | 0160 | 0.336256 | 0.630854 | 0.455925 |
| 0 | 0161 | 0.207980 | 0.134324 | 0.956762 |
| 0 | 0162 | 0.706956 | 0.152990 | 0.543448 |
| 0 | 0163 | 0.824532 | 0.665453 | 0.072301 |
| 0 | 0164 | 0.709077 | 0.345372 | 0.550495 |
| 0 | 0165 | 0.835017 | 0.843628 | 0.038730 |
| 0 | 0166 | 0.279485 | 0.831499 | 0.277852 |
| 0 | 0167 | 0.274900 | 0.335855 | 0.784698 |
| 0 | 0168 | 0.274378 | 0.656453 | 0.287332 |
| 0 | 0169 | 0.265927 | 0.159670 | 0.785030 |
| 0 | 0170 | 0.768306 | 0.153720 | 0.717981 |
| 0 | 0171 | 0.785592 | 0.626943 | 0.251775 |
| 0 | 0172 | 0.773252 | 0.314859 | 0.715417 |
| 0 | 0173 | 0.781483 | 0.821074 | 0.215389 |
| 0 | 0174 | 0.302080 | 0.741371 | 0.552044 |
| 0 | 0175 | 0.246789 | 0.242113 | 0.054064 |
| 0 | 0176 | 0.743995 | 0.250434 | 0.422886 |
| 0 | 0177 | 0.801445 | 0.741237 | 0.919060 |
| 0 | 0178 | 0.217343 | 0.840575 | 0.519719 |
| 0 | 0179 | 0.329881 | 0.342955 | 0.035086 |
| 0 | 0180 | 0.216954 | 0.641193 | 0.531875 |
| 0 | 0181 | 0.329092 | 0.139627 | 0.027901 |
| 0 | 0182 | 0.825723 | 0.149922 | 0.465346 |
| 0 | 0183 | 0.717195 | 0.644732 | 0.967160 |
| 0 | 0184 | 0.830379 | 0.342177 | 0.480434 |
| 0 | 0185 | 0.716244 | 0.838086 | 0.961790 |
| 0 | 0186 | 0.136680 | 0.742483 | 0.573908 |
| 0 | 0187 | 0.408958 | 0.239580 | 0.074720 |
| 0 | 0188 | 0.912835 | 0.245516 | 0.422431 |
| 0 | 0189 | 0.631962 | 0.740435 | 0.915337 |
| 0 | 0190 | 0.098129 | 0.833685 | 0.442433 |
| 0 | 0191 | 0.440124 | 0.323324 | 0.933233 |

|    |       |          |          |          |
|----|-------|----------|----------|----------|
| O  | O192  | 0.104801 | 0.654402 | 0.436598 |
| O  | O193  | 0.443942 | 0.149852 | 0.938036 |
| O  | O194  | 0.937543 | 0.158482 | 0.563743 |
| O  | O195  | 0.602865 | 0.659013 | 0.062141 |
| O  | O196  | 0.943923 | 0.325474 | 0.571485 |
| O  | O197  | 0.596959 | 0.838272 | 0.040023 |
| O  | O198  | 0.150110 | 0.828762 | 0.261162 |
| O  | O199  | 0.401806 | 0.330599 | 0.744086 |
| O  | O200  | 0.147287 | 0.655029 | 0.249850 |
| O  | O201  | 0.394438 | 0.158591 | 0.755181 |
| O  | O202  | 0.894097 | 0.126830 | 0.745947 |
| O  | O203  | 0.644169 | 0.639862 | 0.247691 |
| O  | O204  | 0.899047 | 0.340964 | 0.756380 |
| O  | O205  | 0.651282 | 0.820092 | 0.216728 |
| O  | O206  | 0.223141 | 0.743181 | 0.160715 |
| O  | O207  | 0.320197 | 0.244750 | 0.659731 |
| O  | O208  | 0.841261 | 0.234145 | 0.828793 |
| O  | O209  | 0.717713 | 0.744166 | 0.342054 |
| O  | O210  | 0.752893 | 0.740222 | 0.605388 |
| Al | Al211 | 0.716328 | 0.657782 | 0.307857 |
| Si | Si212 | 0.445412 | 0.050180 | 0.190868 |
| Si | Si213 | 0.097603 | 0.552192 | 0.688352 |
| Si | Si214 | 0.450718 | 0.430623 | 0.183667 |
| Si | Si215 | 0.091940 | 0.932645 | 0.686195 |
| Si | Si216 | 0.594170 | 0.935972 | 0.809258 |
| Si | Si217 | 0.943376 | 0.441825 | 0.326530 |
| Si | Si218 | 0.592903 | 0.539865 | 0.835163 |
| Si | Si219 | 0.945384 | 0.047848 | 0.319782 |
| Si | Si220 | 0.338827 | 0.024042 | 0.343203 |
| Si | Si221 | 0.204743 | 0.524117 | 0.840913 |
| Si | Si222 | 0.338537 | 0.461962 | 0.333426 |
| Si | Si223 | 0.199481 | 0.963696 | 0.838066 |
| Si | Si224 | 0.699900 | 0.963716 | 0.650658 |
| Si | Si225 | 0.840118 | 0.464733 | 0.160988 |
| Si | Si226 | 0.710127 | 0.515047 | 0.690920 |
| Si | Si227 | 0.839014 | 0.018234 | 0.162959 |
| Si | Si228 | 0.297874 | 0.046353 | 0.561935 |
| Si | Si229 | 0.241916 | 0.544255 | 0.061368 |
| Si | Si230 | 0.296734 | 0.438407 | 0.549998 |
| Si | Si231 | 0.242962 | 0.938236 | 0.054449 |
| Si | Si232 | 0.739249 | 0.934739 | 0.437151 |
| Si | Si233 | 0.800294 | 0.424486 | 0.950893 |
| Si | Si234 | 0.745321 | 0.560941 | 0.477686 |
| Si | Si235 | 0.792628 | 0.047224 | 0.950039 |

|    |       |          |          |          |
|----|-------|----------|----------|----------|
| Si | Si236 | 0.142420 | 0.053993 | 0.548342 |
| Si | Si237 | 0.396700 | 0.550509 | 0.047831 |
| Si | Si238 | 0.143256 | 0.429889 | 0.547442 |
| Si | Si239 | 0.396796 | 0.931448 | 0.047751 |
| Si | Si240 | 0.894533 | 0.922690 | 0.450247 |
| Si | Si241 | 0.644509 | 0.423014 | 0.971378 |
| Si | Si242 | 0.899686 | 0.565402 | 0.465618 |
| Si | Si243 | 0.639382 | 0.053609 | 0.958962 |
| Si | Si244 | 0.096939 | 0.023414 | 0.332193 |
| Si | Si245 | 0.443971 | 0.519467 | 0.832625 |
| Si | Si246 | 0.094259 | 0.463155 | 0.336554 |
| Si | Si247 | 0.444357 | 0.962368 | 0.833345 |
| Si | Si248 | 0.945136 | 0.958007 | 0.659259 |
| Si | Si249 | 0.597800 | 0.462177 | 0.179573 |
| Si | Si250 | 0.950294 | 0.524274 | 0.671879 |
| Si | Si251 | 0.593551 | 0.019435 | 0.171451 |
| Si | Si252 | 0.219366 | 0.060335 | 0.207626 |
| Si | Si253 | 0.323182 | 0.558574 | 0.704668 |
| Si | Si254 | 0.213406 | 0.423140 | 0.209682 |
| Si | Si255 | 0.320866 | 0.922776 | 0.709777 |
| Si | Si256 | 0.817647 | 0.929942 | 0.790428 |
| Si | Si257 | 0.721463 | 0.446213 | 0.313235 |
| Si | Si258 | 0.831808 | 0.550912 | 0.818988 |
| Si | Si259 | 0.718211 | 0.060976 | 0.295369 |
| Si | Si260 | 0.447981 | 0.819385 | 0.187382 |
| Si | Si261 | 0.097520 | 0.320388 | 0.695439 |
| Si | Si262 | 0.444256 | 0.662699 | 0.189873 |
| Si | Si263 | 0.094588 | 0.163341 | 0.694731 |
| Si | Si264 | 0.594388 | 0.161424 | 0.805183 |
| Si | Si265 | 0.953678 | 0.663405 | 0.308212 |
| Si | Si266 | 0.598005 | 0.320393 | 0.813395 |
| Si | Si267 | 0.952590 | 0.821000 | 0.297395 |
| Si | Si268 | 0.341434 | 0.864869 | 0.334764 |
| Si | Si269 | 0.209065 | 0.365194 | 0.836858 |
| Si | Si270 | 0.337804 | 0.620314 | 0.336760 |
| Si | Si271 | 0.204838 | 0.121811 | 0.838201 |
| Si | Si272 | 0.706935 | 0.123858 | 0.655494 |
| Si | Si273 | 0.841385 | 0.620357 | 0.169118 |
| Si | Si274 | 0.713485 | 0.358564 | 0.668941 |
| Si | Si275 | 0.840520 | 0.858566 | 0.156349 |
| Si | Si276 | 0.293685 | 0.820979 | 0.542434 |
| Si | Si277 | 0.252931 | 0.322086 | 0.048135 |
| Si | Si278 | 0.293708 | 0.661602 | 0.547077 |
| Si | Si279 | 0.252999 | 0.162237 | 0.047046 |

|    |       |          |          |          |
|----|-------|----------|----------|----------|
| Si | Si280 | 0.749660 | 0.171624 | 0.445409 |
| Si | Si281 | 0.794460 | 0.666068 | 0.961734 |
| Si | Si282 | 0.753585 | 0.327684 | 0.453750 |
| Si | Si283 | 0.793525 | 0.819784 | 0.942105 |
| Si | Si284 | 0.141051 | 0.820135 | 0.542102 |
| Si | Si285 | 0.405720 | 0.317093 | 0.041434 |
| Si | Si286 | 0.140616 | 0.664683 | 0.542542 |
| Si | Si287 | 0.405669 | 0.161979 | 0.042085 |
| Si | Si288 | 0.903516 | 0.168130 | 0.455614 |
| Si | Si289 | 0.640055 | 0.664380 | 0.956316 |
| Si | Si290 | 0.907139 | 0.321388 | 0.464672 |
| Si | Si291 | 0.639467 | 0.819018 | 0.942010 |
| Si | Si292 | 0.096773 | 0.865549 | 0.331343 |
| Si | Si293 | 0.450178 | 0.361269 | 0.827938 |
| Si | Si294 | 0.098910 | 0.619191 | 0.328672 |
| Si | Si295 | 0.447278 | 0.121239 | 0.825342 |
| Si | Si296 | 0.950300 | 0.114658 | 0.663128 |
| Si | Si297 | 0.591960 | 0.618521 | 0.166114 |
| Si | Si298 | 0.952359 | 0.365615 | 0.675552 |
| Si | Si299 | 0.595296 | 0.860416 | 0.155897 |
| Si | Si300 | 0.218766 | 0.819036 | 0.201921 |
| Si | Si301 | 0.328647 | 0.320947 | 0.698223 |
| Si | Si302 | 0.219054 | 0.667199 | 0.201527 |
| Si | Si303 | 0.323551 | 0.169253 | 0.702588 |
| Si | Si304 | 0.828672 | 0.157622 | 0.796672 |
| Si | Si305 | 0.830815 | 0.311553 | 0.799386 |
| Si | Si306 | 0.716896 | 0.815438 | 0.285220 |
| Zn | Zn307 | 0.698807 | 0.724901 | 0.498484 |

**C<sub>6</sub>H<sub>8</sub>-Phys.Ads-ZnOH<sup>+</sup> (Fig. 9b/M1 in Green)** Total energy = -1945.83321476 eV

data\_

\_audit\_creation\_method 'Materials Studio'

\_cell\_length\_a 20.357621

\_cell\_length\_b 20.050598

\_cell\_length\_c 13.476578

\_cell\_angle\_alpha 90.000000

\_cell\_angle\_beta 90.000000

\_cell\_angle\_gamma 90.000000

\_symmetry\_space\_group\_name\_H-M 'P1'

loop\_

\_atom\_site\_type\_symbol

\_atom\_site\_label

\_atom\_site\_fract\_x

\_atom\_site\_fract\_y

\_atom\_site\_fract\_z

|   |     |          |          |          |
|---|-----|----------|----------|----------|
| H | H1  | 0.745085 | 0.784414 | 0.631170 |
| H | H2  | 0.597918 | 0.781340 | 0.675383 |
| H | H3  | 0.517236 | 0.777478 | 0.628845 |
| H | H4  | 0.613413 | 0.662135 | 0.664414 |
| H | H5  | 0.536120 | 0.673655 | 0.718428 |
| H | H6  | 0.512607 | 0.591076 | 0.587297 |
| H | H7  | 0.522482 | 0.625673 | 0.412202 |
| H | H8  | 0.580564 | 0.730425 | 0.368112 |
| H | H9  | 0.604227 | 0.815479 | 0.494631 |
| C | C10 | 0.566535 | 0.754943 | 0.622646 |
| C | C11 | 0.563336 | 0.680624 | 0.649344 |
| C | C12 | 0.534601 | 0.638694 | 0.567778 |
| C | C13 | 0.540146 | 0.657114 | 0.471843 |
| C | C14 | 0.572342 | 0.719480 | 0.446028 |
| C | C15 | 0.588847 | 0.765645 | 0.517011 |
| O | O16 | 0.520779 | 0.033061 | 0.217673 |
| O | O17 | 0.021253 | 0.541422 | 0.719633 |
| O | O18 | 0.527043 | 0.437916 | 0.220272 |
| O | O19 | 0.013279 | 0.932568 | 0.707911 |
| O | O20 | 0.516006 | 0.943682 | 0.790586 |
| O | O21 | 0.020847 | 0.456950 | 0.299202 |
| O | O22 | 0.517758 | 0.536499 | 0.796509 |
| O | O23 | 0.021785 | 0.034397 | 0.296060 |
| O | O24 | 0.403409 | 0.057694 | 0.292936 |
| O | O25 | 0.139140 | 0.556166 | 0.793719 |
| O | O26 | 0.405372 | 0.432345 | 0.287666 |
| O | O27 | 0.129369 | 0.940472 | 0.792047 |
| O | O28 | 0.629958 | 0.948527 | 0.703593 |
| O | O29 | 0.903594 | 0.436292 | 0.223129 |
| O | O30 | 0.637637 | 0.523394 | 0.736807 |
| O | O31 | 0.905157 | 0.045761 | 0.215561 |
| O | O32 | 0.441162 | 0.119233 | 0.128035 |
| O | O33 | 0.106051 | 0.622260 | 0.631401 |
| O | O34 | 0.441522 | 0.359849 | 0.131630 |
| O | O35 | 0.112835 | 0.863318 | 0.634555 |
| O | O36 | 0.611350 | 0.861459 | 0.847673 |
| O | O37 | 0.941024 | 0.370967 | 0.384572 |
| O | O38 | 0.608183 | 0.614034 | 0.873702 |
| O | O39 | 0.936819 | 0.119560 | 0.373704 |
| O | O40 | 0.413693 | 0.990422 | 0.125405 |
| O | O41 | 0.124590 | 0.491459 | 0.623655 |
| O | O42 | 0.431512 | 0.491081 | 0.114384 |

|   |     |          |          |          |
|---|-----|----------|----------|----------|
| 0 | 043 | 0.109880 | 0.994481 | 0.613535 |
| 0 | 044 | 0.619511 | 0.990568 | 0.890308 |
| 0 | 045 | 0.913107 | 0.500774 | 0.393529 |
| 0 | 046 | 0.604548 | 0.484036 | 0.919376 |
| 0 | 047 | 0.917002 | 0.989326 | 0.393055 |
| 0 | 048 | 0.340614 | 0.038141 | 0.461577 |
| 0 | 049 | 0.200627 | 0.537992 | 0.962316 |
| 0 | 050 | 0.342645 | 0.450251 | 0.457012 |
| 0 | 051 | 0.197774 | 0.949262 | 0.956714 |
| 0 | 052 | 0.695465 | 0.934441 | 0.538840 |
| 0 | 053 | 0.836708 | 0.421870 | 0.057778 |
| 0 | 054 | 0.707361 | 0.543241 | 0.578138 |
| 0 | 055 | 0.839702 | 0.035416 | 0.045765 |
| 0 | 056 | 0.338436 | 0.945262 | 0.319058 |
| 0 | 057 | 0.206882 | 0.445191 | 0.819322 |
| 0 | 058 | 0.334802 | 0.541779 | 0.313007 |
| 0 | 059 | 0.210679 | 0.042525 | 0.815495 |
| 0 | 060 | 0.714642 | 0.043198 | 0.650978 |
| 0 | 061 | 0.850999 | 0.542678 | 0.133000 |
| 0 | 062 | 0.730059 | 0.435830 | 0.689798 |
| 0 | 063 | 0.832938 | 0.937991 | 0.179615 |
| 0 | 064 | 0.271944 | 0.057003 | 0.297836 |
| 0 | 065 | 0.269861 | 0.559271 | 0.798919 |
| 0 | 066 | 0.274480 | 0.426396 | 0.293686 |
| 0 | 067 | 0.258929 | 0.922890 | 0.786361 |
| 0 | 068 | 0.759231 | 0.925863 | 0.708669 |
| 0 | 069 | 0.773943 | 0.454521 | 0.221977 |
| 0 | 070 | 0.763430 | 0.554628 | 0.755446 |
| 0 | 071 | 0.775238 | 0.054291 | 0.213411 |
| 0 | 072 | 0.312545 | 0.119081 | 0.609889 |
| 0 | 073 | 0.231631 | 0.617067 | 0.112041 |
| 0 | 074 | 0.320460 | 0.371158 | 0.609510 |
| 0 | 075 | 0.221931 | 0.868952 | 0.107891 |
| 0 | 076 | 0.712847 | 0.872843 | 0.369600 |
| 0 | 077 | 0.809156 | 0.352406 | 0.897186 |
| 0 | 078 | 0.714744 | 0.629098 | 0.432463 |
| 0 | 079 | 0.812094 | 0.117759 | 0.898361 |
| 0 | 080 | 0.219973 | 0.040047 | 0.534431 |
| 0 | 081 | 0.319915 | 0.533125 | 0.037892 |
| 0 | 082 | 0.221085 | 0.435210 | 0.521382 |
| 0 | 083 | 0.319151 | 0.935557 | 0.019879 |
| 0 | 084 | 0.815520 | 0.924154 | 0.467069 |
| 0 | 085 | 0.722702 | 0.440191 | 0.964977 |
| 0 | 086 | 0.824159 | 0.567162 | 0.498881 |

|   |      |          |          |          |
|---|------|----------|----------|----------|
| 0 | 087  | 0.716446 | 0.050039 | 0.987590 |
| 0 | 088  | 0.317933 | 0.988921 | 0.639669 |
| 0 | 089  | 0.218184 | 0.486987 | 0.140231 |
| 0 | 090  | 0.306475 | 0.501490 | 0.630202 |
| 0 | 091  | 0.231558 | 0.999297 | 0.131492 |
| 0 | 092  | 0.728743 | 0.003538 | 0.380363 |
| 0 | 093  | 0.833564 | 0.482165 | 0.882624 |
| 0 | 094  | 0.735316 | 0.500679 | 0.397275 |
| 0 | 095  | 0.799943 | 0.988255 | 0.870612 |
| 0 | 096  | 0.130851 | 0.125127 | 0.603841 |
| 0 | 097  | 0.407129 | 0.621311 | 0.104194 |
| 0 | 098  | 0.130325 | 0.359399 | 0.604217 |
| 0 | 099  | 0.412826 | 0.859532 | 0.097611 |
| 0 | 0100 | 0.913039 | 0.855797 | 0.388048 |
| 0 | 0101 | 0.629594 | 0.353601 | 0.912131 |
| 0 | 0102 | 0.919393 | 0.633164 | 0.405370 |
| 0 | 0103 | 0.623646 | 0.123109 | 0.901751 |
| 0 | 0104 | 0.106338 | 0.057066 | 0.441205 |
| 0 | 0105 | 0.431758 | 0.553358 | 0.941803 |
| 0 | 0106 | 0.099193 | 0.434477 | 0.451251 |
| 0 | 0107 | 0.441183 | 0.939810 | 0.949584 |
| 0 | 0108 | 0.930606 | 0.917569 | 0.557533 |
| 0 | 0109 | 0.620793 | 0.415801 | 0.084837 |
| 0 | 0110 | 0.946110 | 0.560609 | 0.562937 |
| 0 | 0111 | 0.596344 | 0.051390 | 0.061034 |
| 0 | 0112 | 0.145191 | 0.057791 | 0.252386 |
| 0 | 0113 | 0.395806 | 0.552259 | 0.751916 |
| 0 | 0114 | 0.144726 | 0.420309 | 0.267767 |
| 0 | 0115 | 0.389192 | 0.923022 | 0.770967 |
| 0 | 0116 | 0.886892 | 0.947159 | 0.738954 |
| 0 | 0117 | 0.648603 | 0.454620 | 0.269950 |
| 0 | 0118 | 0.893783 | 0.551857 | 0.744109 |
| 0 | 0119 | 0.646742 | 0.052639 | 0.244222 |
| 0 | 0120 | 0.114509 | 0.944447 | 0.339136 |
| 0 | 0121 | 0.432061 | 0.440149 | 0.840326 |
| 0 | 0122 | 0.119286 | 0.540626 | 0.337452 |
| 0 | 0123 | 0.431216 | 0.042224 | 0.826152 |
| 0 | 0124 | 0.950660 | 0.036886 | 0.631005 |
| 0 | 0125 | 0.594134 | 0.538654 | 0.139699 |
| 0 | 0126 | 0.942953 | 0.444851 | 0.653383 |
| 0 | 0127 | 0.607809 | 0.939419 | 0.164569 |
| 0 | 0128 | 0.227026 | 0.130973 | 0.150781 |
| 0 | 0129 | 0.319352 | 0.632064 | 0.652526 |
| 0 | 0130 | 0.224197 | 0.353837 | 0.150616 |



|   |      |          |          |          |
|---|------|----------|----------|----------|
| 0 | 0131 | 0.318109 | 0.855784 | 0.644790 |
| 0 | 0132 | 0.822110 | 0.859431 | 0.846737 |
| 0 | 0133 | 0.729837 | 0.371683 | 0.359204 |
| 0 | 0134 | 0.834776 | 0.615276 | 0.889828 |
| 0 | 0135 | 0.720501 | 0.132341 | 0.349770 |
| 0 | 0136 | 0.523999 | 0.841198 | 0.201468 |
| 0 | 0137 | 0.024211 | 0.350321 | 0.719670 |
| 0 | 0138 | 0.519528 | 0.637267 | 0.205854 |
| 0 | 0139 | 0.020444 | 0.135639 | 0.710640 |
| 0 | 0140 | 0.520108 | 0.135217 | 0.781956 |
| 0 | 0141 | 0.025604 | 0.627785 | 0.290177 |
| 0 | 0142 | 0.525119 | 0.351279 | 0.792288 |
| 0 | 0143 | 0.024363 | 0.856374 | 0.284120 |
| 0 | 0144 | 0.410251 | 0.835913 | 0.291790 |
| 0 | 0145 | 0.142026 | 0.331265 | 0.795797 |
| 0 | 0146 | 0.407115 | 0.651218 | 0.296625 |
| 0 | 0147 | 0.135207 | 0.150171 | 0.797462 |
| 0 | 0148 | 0.638304 | 0.144540 | 0.708069 |
| 0 | 0149 | 0.912851 | 0.647455 | 0.207935 |
| 0 | 0150 | 0.642825 | 0.337932 | 0.716421 |
| 0 | 0151 | 0.911237 | 0.831799 | 0.195379 |
| 0 | 0152 | 0.442821 | 0.740741 | 0.161969 |
| 0 | 0153 | 0.093091 | 0.242248 | 0.670061 |
| 0 | 0154 | 0.594106 | 0.240581 | 0.828249 |
| 0 | 0155 | 0.963151 | 0.742903 | 0.321646 |
| 0 | 0156 | 0.338693 | 0.848617 | 0.452282 |
| 0 | 0157 | 0.210769 | 0.351220 | 0.957270 |
| 0 | 0158 | 0.337259 | 0.631816 | 0.458152 |
| 0 | 0159 | 0.207903 | 0.134383 | 0.957240 |
| 0 | 0160 | 0.707035 | 0.153727 | 0.544383 |
| 0 | 0161 | 0.825390 | 0.665344 | 0.071122 |
| 0 | 0162 | 0.708880 | 0.344641 | 0.549472 |
| 0 | 0163 | 0.834469 | 0.843247 | 0.039747 |
| 0 | 0164 | 0.279990 | 0.831910 | 0.277509 |
| 0 | 0165 | 0.273117 | 0.334715 | 0.786677 |
| 0 | 0166 | 0.276749 | 0.658392 | 0.288425 |
| 0 | 0167 | 0.265663 | 0.159597 | 0.785316 |
| 0 | 0168 | 0.768125 | 0.153524 | 0.719120 |
| 0 | 0169 | 0.787380 | 0.627510 | 0.251464 |
| 0 | 0170 | 0.771934 | 0.313824 | 0.715504 |
| 0 | 0171 | 0.781811 | 0.820813 | 0.217186 |
| 0 | 0172 | 0.301727 | 0.742196 | 0.552808 |
| 0 | 0173 | 0.246835 | 0.242189 | 0.054401 |
| 0 | 0174 | 0.744053 | 0.249929 | 0.421700 |

|    |       |          |          |          |
|----|-------|----------|----------|----------|
| O  | O175  | 0.802000 | 0.741502 | 0.918344 |
| O  | O176  | 0.217053 | 0.841298 | 0.520041 |
| O  | O177  | 0.329949 | 0.342953 | 0.034058 |
| O  | O178  | 0.217120 | 0.641712 | 0.530955 |
| O  | O179  | 0.329043 | 0.139697 | 0.028382 |
| O  | O180  | 0.825436 | 0.149398 | 0.465025 |
| O  | O181  | 0.717634 | 0.645152 | 0.966680 |
| O  | O182  | 0.830058 | 0.342178 | 0.478922 |
| O  | O183  | 0.716223 | 0.837904 | 0.961068 |
| O  | O184  | 0.136838 | 0.742739 | 0.574069 |
| O  | O185  | 0.408868 | 0.239802 | 0.074864 |
| O  | O186  | 0.912402 | 0.245176 | 0.421920 |
| O  | O187  | 0.632172 | 0.740334 | 0.913419 |
| O  | O188  | 0.097816 | 0.833808 | 0.442864 |
| O  | O189  | 0.443344 | 0.327531 | 0.939470 |
| O  | O190  | 0.103332 | 0.652854 | 0.439811 |
| O  | O191  | 0.443428 | 0.151125 | 0.937206 |
| O  | O192  | 0.936961 | 0.158827 | 0.564106 |
| O  | O193  | 0.602431 | 0.658341 | 0.059174 |
| O  | O194  | 0.943597 | 0.325671 | 0.570317 |
| O  | O195  | 0.596897 | 0.837525 | 0.039099 |
| O  | O196  | 0.150544 | 0.828659 | 0.262247 |
| O  | O197  | 0.400667 | 0.327384 | 0.751803 |
| O  | O198  | 0.149248 | 0.655926 | 0.254638 |
| O  | O199  | 0.393994 | 0.157952 | 0.754107 |
| O  | O200  | 0.893953 | 0.126226 | 0.746177 |
| O  | O201  | 0.646161 | 0.638859 | 0.243501 |
| O  | O202  | 0.897469 | 0.342413 | 0.754202 |
| O  | O203  | 0.651599 | 0.820019 | 0.215572 |
| O  | O204  | 0.223439 | 0.743236 | 0.161198 |
| O  | O205  | 0.319560 | 0.245077 | 0.660464 |
| O  | O206  | 0.842101 | 0.234410 | 0.827700 |
| O  | O207  | 0.716760 | 0.743475 | 0.341691 |
| O  | O208  | 0.747523 | 0.739202 | 0.606553 |
| Al | Al209 | 0.717226 | 0.657305 | 0.306178 |
| Si | Si210 | 0.445077 | 0.050372 | 0.190623 |
| Si | Si211 | 0.097623 | 0.552699 | 0.691199 |
| Si | Si212 | 0.450810 | 0.430455 | 0.188563 |
| Si | Si213 | 0.091628 | 0.932783 | 0.686568 |
| Si | Si214 | 0.594111 | 0.936329 | 0.809533 |
| Si | Si215 | 0.944583 | 0.441599 | 0.325916 |
| Si | Si216 | 0.593294 | 0.539530 | 0.833401 |
| Si | Si217 | 0.944986 | 0.047362 | 0.320264 |
| Si | Si218 | 0.338541 | 0.024502 | 0.343234 |

|    |       |          |          |          |
|----|-------|----------|----------|----------|
| Si | Si219 | 0.204193 | 0.524423 | 0.844192 |
| Si | Si220 | 0.339339 | 0.462520 | 0.338135 |
| Si | Si221 | 0.199255 | 0.963705 | 0.838459 |
| Si | Si222 | 0.699917 | 0.963775 | 0.650973 |
| Si | Si223 | 0.841550 | 0.464475 | 0.160057 |
| Si | Si224 | 0.710156 | 0.514371 | 0.689732 |
| Si | Si225 | 0.838507 | 0.018226 | 0.163487 |
| Si | Si226 | 0.297394 | 0.046724 | 0.561852 |
| Si | Si227 | 0.242733 | 0.544007 | 0.063892 |
| Si | Si228 | 0.297609 | 0.439284 | 0.555104 |
| Si | Si229 | 0.242609 | 0.938253 | 0.054823 |
| Si | Si230 | 0.739015 | 0.933722 | 0.437674 |
| Si | Si231 | 0.800655 | 0.424371 | 0.950644 |
| Si | Si232 | 0.746041 | 0.560318 | 0.476383 |
| Si | Si233 | 0.792483 | 0.047896 | 0.950490 |
| Si | Si234 | 0.142044 | 0.054096 | 0.548546 |
| Si | Si235 | 0.397403 | 0.549696 | 0.050061 |
| Si | Si236 | 0.143863 | 0.430456 | 0.550576 |
| Si | Si237 | 0.396451 | 0.931334 | 0.048187 |
| Si | Si238 | 0.894399 | 0.921994 | 0.450548 |
| Si | Si239 | 0.644902 | 0.422978 | 0.970488 |
| Si | Si240 | 0.900455 | 0.565406 | 0.464337 |
| Si | Si241 | 0.639052 | 0.053916 | 0.959473 |
| Si | Si242 | 0.096657 | 0.023367 | 0.332496 |
| Si | Si243 | 0.444156 | 0.520015 | 0.833762 |
| Si | Si244 | 0.095734 | 0.462986 | 0.338389 |
| Si | Si245 | 0.444261 | 0.962580 | 0.834043 |
| Si | Si246 | 0.944986 | 0.958350 | 0.659385 |
| Si | Si247 | 0.597959 | 0.462160 | 0.178445 |
| Si | Si248 | 0.950370 | 0.524675 | 0.670891 |
| Si | Si249 | 0.593081 | 0.018943 | 0.171730 |
| Si | Si250 | 0.218917 | 0.060429 | 0.207903 |
| Si | Si251 | 0.322446 | 0.560548 | 0.708445 |
| Si | Si252 | 0.215475 | 0.422478 | 0.212731 |
| Si | Si253 | 0.320702 | 0.923460 | 0.710120 |
| Si | Si254 | 0.817562 | 0.930577 | 0.790996 |
| Si | Si255 | 0.722372 | 0.445680 | 0.311996 |
| Si | Si256 | 0.831518 | 0.550680 | 0.818201 |
| Si | Si257 | 0.717813 | 0.060149 | 0.296235 |
| Si | Si258 | 0.447723 | 0.819218 | 0.188001 |
| Si | Si259 | 0.096996 | 0.320692 | 0.697480 |
| Si | Si260 | 0.444900 | 0.662476 | 0.191244 |
| Si | Si261 | 0.094590 | 0.163472 | 0.695315 |
| Si | Si262 | 0.594067 | 0.161427 | 0.805060 |

|    |       |          |          |          |
|----|-------|----------|----------|----------|
| Si | Si263 | 0.954732 | 0.663173 | 0.306619 |
| Si | Si264 | 0.597847 | 0.320559 | 0.812569 |
| Si | Si265 | 0.953004 | 0.820990 | 0.297212 |
| Si | Si266 | 0.341596 | 0.865385 | 0.334968 |
| Si | Si267 | 0.208154 | 0.365593 | 0.839340 |
| Si | Si268 | 0.338817 | 0.620708 | 0.339065 |
| Si | Si269 | 0.204671 | 0.121728 | 0.838741 |
| Si | Si270 | 0.707052 | 0.123767 | 0.655930 |
| Si | Si271 | 0.842509 | 0.620281 | 0.167854 |
| Si | Si272 | 0.712948 | 0.358065 | 0.667870 |
| Si | Si273 | 0.840272 | 0.858552 | 0.157163 |
| Si | Si274 | 0.293404 | 0.821742 | 0.542681 |
| Si | Si275 | 0.253121 | 0.322164 | 0.049309 |
| Si | Si276 | 0.293620 | 0.662409 | 0.548249 |
| Si | Si277 | 0.252939 | 0.162309 | 0.047472 |
| Si | Si278 | 0.749369 | 0.171287 | 0.445559 |
| Si | Si279 | 0.794949 | 0.666240 | 0.960743 |
| Si | Si280 | 0.753276 | 0.327232 | 0.452513 |
| Si | Si281 | 0.793662 | 0.819910 | 0.942221 |
| Si | Si282 | 0.140854 | 0.820415 | 0.542439 |
| Si | Si283 | 0.405840 | 0.317860 | 0.044697 |
| Si | Si284 | 0.140752 | 0.664693 | 0.544148 |
| Si | Si285 | 0.405585 | 0.162316 | 0.041856 |
| Si | Si286 | 0.903189 | 0.167885 | 0.455667 |
| Si | Si287 | 0.640497 | 0.664244 | 0.954101 |
| Si | Si288 | 0.906830 | 0.321230 | 0.463514 |
| Si | Si289 | 0.639513 | 0.818794 | 0.940907 |
| Si | Si290 | 0.096948 | 0.865635 | 0.331710 |
| Si | Si291 | 0.450296 | 0.361661 | 0.830737 |
| Si | Si292 | 0.099635 | 0.619092 | 0.330557 |
| Si | Si293 | 0.446961 | 0.121549 | 0.825079 |
| Si | Si294 | 0.950193 | 0.114812 | 0.663167 |
| Si | Si295 | 0.592444 | 0.618424 | 0.163747 |
| Si | Si296 | 0.951890 | 0.365878 | 0.674360 |
| Si | Si297 | 0.595154 | 0.859774 | 0.154938 |
| Si | Si298 | 0.218938 | 0.819123 | 0.202284 |
| Si | Si299 | 0.328297 | 0.320513 | 0.702122 |
| Si | Si300 | 0.220315 | 0.667659 | 0.203871 |
| Si | Si301 | 0.322955 | 0.169339 | 0.702424 |
| Si | Si302 | 0.828888 | 0.157706 | 0.797054 |
| Si | Si303 | 0.830217 | 0.311653 | 0.798439 |
| Si | Si304 | 0.716513 | 0.814998 | 0.285486 |
| Zn | Zn305 | 0.695877 | 0.722768 | 0.497262 |

**TS-C<sub>6</sub>H<sub>8</sub>-Dehydro-on-HydroxyO-ZnOH<sup>+</sup> (Fig. 9b/TS1 in Green)**

Total energy = -1943.86065690 eV

data\_

\_audit\_creation\_method 'Materials Studio'

\_cell\_length\_a 20.357621

\_cell\_length\_b 20.050598

\_cell\_length\_c 13.476578

\_cell\_angle\_alpha 90.000000

\_cell\_angle\_beta 90.000000

\_cell\_angle\_gamma 90.000000

\_symmetry\_space\_group\_name\_H-M 'P1'

loop\_

\_atom\_site\_type\_symbol

\_atom\_site\_label

\_atom\_site\_fract\_x

\_atom\_site\_fract\_y

\_atom\_site\_fract\_z

|   |     |          |          |          |
|---|-----|----------|----------|----------|
| H | H1  | 0.740118 | 0.745865 | 0.652004 |
| H | H2  | 0.585052 | 0.849733 | 0.515463 |
| H | H3  | 0.481330 | 0.866109 | 0.603219 |
| H | H4  | 0.418492 | 0.767452 | 0.668151 |
| H | H5  | 0.473532 | 0.659717 | 0.691425 |
| H | H6  | 0.583095 | 0.642310 | 0.617337 |
| H | H7  | 0.599600 | 0.706034 | 0.702996 |
| H | H8  | 0.576091 | 0.717395 | 0.478989 |
| H | H9  | 0.658539 | 0.758306 | 0.587663 |
| C | C10 | 0.561707 | 0.808351 | 0.553714 |
| C | C11 | 0.503997 | 0.817090 | 0.601258 |
| C | C12 | 0.469325 | 0.760935 | 0.645993 |
| C | C13 | 0.499437 | 0.701780 | 0.659265 |
| C | C14 | 0.571456 | 0.694239 | 0.635385 |
| C | C15 | 0.593474 | 0.740389 | 0.549715 |
| O | O16 | 0.518826 | 0.033839 | 0.211389 |
| O | O17 | 0.015287 | 0.544871 | 0.713079 |
| O | O18 | 0.524273 | 0.435749 | 0.213115 |
| O | O19 | 0.011800 | 0.934314 | 0.703732 |
| O | O20 | 0.515363 | 0.949137 | 0.786006 |
| O | O21 | 0.020318 | 0.456798 | 0.292159 |
| O | O22 | 0.513786 | 0.540208 | 0.790604 |
| O | O23 | 0.019131 | 0.033170 | 0.292436 |
| O | O24 | 0.400875 | 0.059251 | 0.284897 |
| O | O25 | 0.131030 | 0.552147 | 0.795488 |
| O | O26 | 0.404783 | 0.432337 | 0.289891 |

|   |     |          |          |          |
|---|-----|----------|----------|----------|
| 0 | 027 | 0.129417 | 0.938244 | 0.784087 |
| 0 | 028 | 0.629657 | 0.952127 | 0.699756 |
| 0 | 029 | 0.904144 | 0.437440 | 0.211340 |
| 0 | 030 | 0.631618 | 0.523454 | 0.721127 |
| 0 | 031 | 0.903009 | 0.042046 | 0.210618 |
| 0 | 032 | 0.439704 | 0.119391 | 0.119824 |
| 0 | 033 | 0.106369 | 0.623603 | 0.634871 |
| 0 | 034 | 0.434445 | 0.359291 | 0.131238 |
| 0 | 035 | 0.107855 | 0.863608 | 0.624973 |
| 0 | 036 | 0.608049 | 0.862854 | 0.841076 |
| 0 | 037 | 0.938624 | 0.370388 | 0.372951 |
| 0 | 038 | 0.610427 | 0.614504 | 0.859966 |
| 0 | 039 | 0.933320 | 0.119208 | 0.365535 |
| 0 | 040 | 0.412515 | 0.990329 | 0.118461 |
| 0 | 041 | 0.118672 | 0.492332 | 0.620479 |
| 0 | 042 | 0.424832 | 0.490311 | 0.115472 |
| 0 | 043 | 0.108287 | 0.995231 | 0.608126 |
| 0 | 044 | 0.619953 | 0.990800 | 0.887714 |
| 0 | 045 | 0.911358 | 0.500094 | 0.383577 |
| 0 | 046 | 0.603456 | 0.484592 | 0.905534 |
| 0 | 047 | 0.914033 | 0.989244 | 0.390534 |
| 0 | 048 | 0.339098 | 0.041414 | 0.455184 |
| 0 | 049 | 0.197045 | 0.538872 | 0.960892 |
| 0 | 050 | 0.340195 | 0.451274 | 0.456859 |
| 0 | 051 | 0.196150 | 0.951013 | 0.950128 |
| 0 | 052 | 0.693808 | 0.936560 | 0.533131 |
| 0 | 053 | 0.836692 | 0.422858 | 0.045721 |
| 0 | 054 | 0.704530 | 0.541881 | 0.564583 |
| 0 | 055 | 0.838245 | 0.036090 | 0.040700 |
| 0 | 056 | 0.337294 | 0.946791 | 0.315631 |
| 0 | 057 | 0.205426 | 0.445451 | 0.818770 |
| 0 | 058 | 0.333416 | 0.542117 | 0.311971 |
| 0 | 059 | 0.206128 | 0.043678 | 0.807621 |
| 0 | 060 | 0.714405 | 0.044909 | 0.642340 |
| 0 | 061 | 0.848310 | 0.542835 | 0.123628 |
| 0 | 062 | 0.725038 | 0.435281 | 0.679377 |
| 0 | 063 | 0.825776 | 0.937939 | 0.172492 |
| 0 | 064 | 0.269285 | 0.057287 | 0.292268 |
| 0 | 065 | 0.261363 | 0.562624 | 0.793353 |
| 0 | 066 | 0.273838 | 0.426235 | 0.291879 |
| 0 | 067 | 0.259608 | 0.925978 | 0.781811 |
| 0 | 068 | 0.759008 | 0.928643 | 0.702766 |
| 0 | 069 | 0.773992 | 0.451380 | 0.211168 |
| 0 | 070 | 0.757142 | 0.555189 | 0.743177 |

|   |      |          |          |          |
|---|------|----------|----------|----------|
| 0 | 071  | 0.773399 | 0.056671 | 0.207471 |
| 0 | 072  | 0.308612 | 0.121269 | 0.603279 |
| 0 | 073  | 0.226982 | 0.616285 | 0.112882 |
| 0 | 074  | 0.316222 | 0.372973 | 0.609409 |
| 0 | 075  | 0.220068 | 0.867789 | 0.097920 |
| 0 | 076  | 0.708712 | 0.870051 | 0.367333 |
| 0 | 077  | 0.804861 | 0.353984 | 0.886448 |
| 0 | 078  | 0.713105 | 0.627356 | 0.418788 |
| 0 | 079  | 0.813691 | 0.119626 | 0.894000 |
| 0 | 080  | 0.218127 | 0.040304 | 0.528144 |
| 0 | 081  | 0.317734 | 0.537935 | 0.030795 |
| 0 | 082  | 0.218438 | 0.439561 | 0.520908 |
| 0 | 083  | 0.317458 | 0.935883 | 0.013775 |
| 0 | 084  | 0.813633 | 0.919914 | 0.460855 |
| 0 | 085  | 0.719831 | 0.440627 | 0.960753 |
| 0 | 086  | 0.821697 | 0.566840 | 0.487067 |
| 0 | 087  | 0.715501 | 0.054601 | 0.982194 |
| 0 | 088  | 0.317342 | 0.991098 | 0.632949 |
| 0 | 089  | 0.219915 | 0.485621 | 0.135824 |
| 0 | 090  | 0.305683 | 0.503285 | 0.630208 |
| 0 | 091  | 0.229517 | 0.997668 | 0.127171 |
| 0 | 092  | 0.729711 | 0.000020 | 0.370944 |
| 0 | 093  | 0.827962 | 0.483891 | 0.871786 |
| 0 | 094  | 0.733732 | 0.499433 | 0.383348 |
| 0 | 095  | 0.797482 | 0.990447 | 0.865799 |
| 0 | 096  | 0.129309 | 0.125862 | 0.598729 |
| 0 | 097  | 0.406353 | 0.621342 | 0.104679 |
| 0 | 098  | 0.128007 | 0.360874 | 0.598718 |
| 0 | 099  | 0.410615 | 0.859257 | 0.092615 |
| 0 | 0100 | 0.914414 | 0.855595 | 0.384927 |
| 0 | 0101 | 0.628928 | 0.354127 | 0.899294 |
| 0 | 0102 | 0.916870 | 0.632768 | 0.393573 |
| 0 | 0103 | 0.620797 | 0.123983 | 0.895286 |
| 0 | 0104 | 0.104332 | 0.058077 | 0.435931 |
| 0 | 0105 | 0.433705 | 0.552148 | 0.943846 |
| 0 | 0106 | 0.097848 | 0.436566 | 0.445841 |
| 0 | 0107 | 0.439009 | 0.938173 | 0.942720 |
| 0 | 0108 | 0.927695 | 0.917631 | 0.555071 |
| 0 | 0109 | 0.614194 | 0.415336 | 0.071609 |
| 0 | 0110 | 0.943029 | 0.561828 | 0.552697 |
| 0 | 0111 | 0.595552 | 0.054107 | 0.056399 |
| 0 | 0112 | 0.142416 | 0.055844 | 0.246796 |
| 0 | 0113 | 0.389235 | 0.555969 | 0.759024 |
| 0 | 0114 | 0.144439 | 0.420108 | 0.262998 |

|   |      |          |          |          |
|---|------|----------|----------|----------|
| 0 | 0115 | 0.389495 | 0.923722 | 0.761492 |
| 0 | 0116 | 0.886165 | 0.948800 | 0.737247 |
| 0 | 0117 | 0.647506 | 0.454725 | 0.254150 |
| 0 | 0118 | 0.887078 | 0.552641 | 0.730746 |
| 0 | 0119 | 0.644871 | 0.050539 | 0.240196 |
| 0 | 0120 | 0.111550 | 0.943846 | 0.337931 |
| 0 | 0121 | 0.430707 | 0.441843 | 0.834842 |
| 0 | 0122 | 0.118576 | 0.541002 | 0.328525 |
| 0 | 0123 | 0.426460 | 0.042920 | 0.824005 |
| 0 | 0124 | 0.948613 | 0.037719 | 0.625282 |
| 0 | 0125 | 0.586893 | 0.537530 | 0.128461 |
| 0 | 0126 | 0.940513 | 0.446315 | 0.643346 |
| 0 | 0127 | 0.604761 | 0.939976 | 0.153937 |
| 0 | 0128 | 0.223393 | 0.129650 | 0.144623 |
| 0 | 0129 | 0.316455 | 0.634161 | 0.650881 |
| 0 | 0130 | 0.224545 | 0.353048 | 0.147762 |
| 0 | 0131 | 0.314727 | 0.857926 | 0.638054 |
| 0 | 0132 | 0.819651 | 0.861634 | 0.843400 |
| 0 | 0133 | 0.725403 | 0.370426 | 0.347678 |
| 0 | 0134 | 0.828368 | 0.617194 | 0.875561 |
| 0 | 0135 | 0.717212 | 0.129643 | 0.348178 |
| 0 | 0136 | 0.522024 | 0.841865 | 0.195790 |
| 0 | 0137 | 0.020164 | 0.350745 | 0.710353 |
| 0 | 0138 | 0.520005 | 0.639532 | 0.202298 |
| 0 | 0139 | 0.018217 | 0.137054 | 0.703993 |
| 0 | 0140 | 0.516883 | 0.134116 | 0.776074 |
| 0 | 0141 | 0.026117 | 0.629869 | 0.284431 |
| 0 | 0142 | 0.521657 | 0.351322 | 0.785356 |
| 0 | 0143 | 0.023130 | 0.855864 | 0.275133 |
| 0 | 0144 | 0.408777 | 0.837827 | 0.287471 |
| 0 | 0145 | 0.136791 | 0.333846 | 0.791166 |
| 0 | 0146 | 0.408631 | 0.650189 | 0.297294 |
| 0 | 0147 | 0.132749 | 0.152555 | 0.791962 |
| 0 | 0148 | 0.634670 | 0.143362 | 0.701140 |
| 0 | 0149 | 0.915017 | 0.645575 | 0.195714 |
| 0 | 0150 | 0.638345 | 0.336489 | 0.704042 |
| 0 | 0151 | 0.908366 | 0.835143 | 0.190610 |
| 0 | 0152 | 0.440234 | 0.741007 | 0.160803 |
| 0 | 0153 | 0.091090 | 0.243570 | 0.663414 |
| 0 | 0154 | 0.590520 | 0.240492 | 0.819367 |
| 0 | 0155 | 0.959757 | 0.743128 | 0.311728 |
| 0 | 0156 | 0.335149 | 0.848586 | 0.446040 |
| 0 | 0157 | 0.205119 | 0.349846 | 0.954581 |
| 0 | 0158 | 0.335522 | 0.632634 | 0.456464 |



|   |      |          |          |          |
|---|------|----------|----------|----------|
| 0 | 0159 | 0.205293 | 0.134198 | 0.951482 |
| 0 | 0160 | 0.705667 | 0.157640 | 0.541166 |
| 0 | 0161 | 0.827283 | 0.665317 | 0.058753 |
| 0 | 0162 | 0.706129 | 0.344316 | 0.538417 |
| 0 | 0163 | 0.829966 | 0.840789 | 0.036331 |
| 0 | 0164 | 0.278780 | 0.834690 | 0.268976 |
| 0 | 0165 | 0.267886 | 0.333277 | 0.784298 |
| 0 | 0166 | 0.279147 | 0.660059 | 0.283485 |
| 0 | 0167 | 0.263439 | 0.160089 | 0.780503 |
| 0 | 0168 | 0.763892 | 0.154575 | 0.718164 |
| 0 | 0169 | 0.789579 | 0.631653 | 0.241436 |
| 0 | 0170 | 0.767968 | 0.313632 | 0.705798 |
| 0 | 0171 | 0.780204 | 0.819323 | 0.216417 |
| 0 | 0172 | 0.297716 | 0.743302 | 0.549222 |
| 0 | 0173 | 0.244069 | 0.241490 | 0.050492 |
| 0 | 0174 | 0.742006 | 0.249238 | 0.411199 |
| 0 | 0175 | 0.797502 | 0.742662 | 0.908741 |
| 0 | 0176 | 0.213518 | 0.841931 | 0.513935 |
| 0 | 0177 | 0.326488 | 0.342360 | 0.023668 |
| 0 | 0178 | 0.214974 | 0.641544 | 0.527246 |
| 0 | 0179 | 0.326304 | 0.139249 | 0.023847 |
| 0 | 0180 | 0.823303 | 0.149780 | 0.460038 |
| 0 | 0181 | 0.714776 | 0.646929 | 0.964857 |
| 0 | 0182 | 0.826990 | 0.343024 | 0.466157 |
| 0 | 0183 | 0.712482 | 0.838916 | 0.954773 |
| 0 | 0184 | 0.134243 | 0.742462 | 0.568871 |
| 0 | 0185 | 0.405469 | 0.240264 | 0.068901 |
| 0 | 0186 | 0.909678 | 0.245119 | 0.413137 |
| 0 | 0187 | 0.630162 | 0.740782 | 0.904676 |
| 0 | 0188 | 0.095342 | 0.830339 | 0.434025 |
| 0 | 0189 | 0.443090 | 0.330787 | 0.937892 |
| 0 | 0190 | 0.098819 | 0.647738 | 0.441916 |
| 0 | 0191 | 0.439786 | 0.153588 | 0.929948 |
| 0 | 0192 | 0.936343 | 0.159235 | 0.555331 |
| 0 | 0193 | 0.595972 | 0.656372 | 0.046276 |
| 0 | 0194 | 0.939892 | 0.327275 | 0.559938 |
| 0 | 0195 | 0.592945 | 0.836168 | 0.031830 |
| 0 | 0196 | 0.149453 | 0.830663 | 0.254176 |
| 0 | 0197 | 0.395945 | 0.328245 | 0.752332 |
| 0 | 0198 | 0.150822 | 0.659892 | 0.261041 |
| 0 | 0199 | 0.391462 | 0.157969 | 0.746383 |
| 0 | 0200 | 0.890957 | 0.128373 | 0.736485 |
| 0 | 0201 | 0.648459 | 0.634616 | 0.224943 |
| 0 | 0202 | 0.893011 | 0.344800 | 0.743194 |

|    |       |          |          |          |
|----|-------|----------|----------|----------|
| O  | O203  | 0.650289 | 0.821773 | 0.206158 |
| O  | O204  | 0.222633 | 0.743332 | 0.157056 |
| O  | O205  | 0.316715 | 0.246506 | 0.656377 |
| O  | O206  | 0.840339 | 0.236392 | 0.819642 |
| O  | O207  | 0.710322 | 0.741511 | 0.332589 |
| O  | O208  | 0.719106 | 0.768334 | 0.596664 |
| Al | Al209 | 0.716331 | 0.656165 | 0.291551 |
| Si | Si210 | 0.443186 | 0.050850 | 0.183352 |
| Si | Si211 | 0.092904 | 0.553127 | 0.689973 |
| Si | Si212 | 0.446825 | 0.429598 | 0.187467 |
| Si | Si213 | 0.089803 | 0.932972 | 0.679864 |
| Si | Si214 | 0.593130 | 0.938585 | 0.804485 |
| Si | Si215 | 0.943699 | 0.441377 | 0.315649 |
| Si | Si216 | 0.590533 | 0.540843 | 0.821065 |
| Si | Si217 | 0.942211 | 0.045982 | 0.315561 |
| Si | Si218 | 0.336676 | 0.026188 | 0.337259 |
| Si | Si219 | 0.198966 | 0.524584 | 0.842860 |
| Si | Si220 | 0.338052 | 0.462952 | 0.337898 |
| Si | Si221 | 0.197869 | 0.964642 | 0.831670 |
| Si | Si222 | 0.699148 | 0.965411 | 0.645134 |
| Si | Si223 | 0.841087 | 0.464197 | 0.149158 |
| Si | Si224 | 0.704783 | 0.513580 | 0.676964 |
| Si | Si225 | 0.835341 | 0.018057 | 0.157934 |
| Si | Si226 | 0.295491 | 0.048563 | 0.555284 |
| Si | Si227 | 0.240750 | 0.544930 | 0.060993 |
| Si | Si228 | 0.295049 | 0.441571 | 0.554941 |
| Si | Si229 | 0.240832 | 0.938141 | 0.047932 |
| Si | Si230 | 0.737165 | 0.931548 | 0.432751 |
| Si | Si231 | 0.797323 | 0.425430 | 0.941211 |
| Si | Si232 | 0.743980 | 0.558102 | 0.463337 |
| Si | Si233 | 0.791463 | 0.050297 | 0.945496 |
| Si | Si234 | 0.140357 | 0.054853 | 0.543086 |
| Si | Si235 | 0.395505 | 0.550516 | 0.049230 |
| Si | Si236 | 0.140955 | 0.432640 | 0.546804 |
| Si | Si237 | 0.394738 | 0.930842 | 0.042034 |
| Si | Si238 | 0.892659 | 0.921066 | 0.447083 |
| Si | Si239 | 0.641861 | 0.423314 | 0.959226 |
| Si | Si240 | 0.898393 | 0.565136 | 0.453008 |
| Si | Si241 | 0.637919 | 0.055759 | 0.954426 |
| Si | Si242 | 0.094169 | 0.022744 | 0.328466 |
| Si | Si243 | 0.441669 | 0.521952 | 0.832845 |
| Si | Si244 | 0.095099 | 0.463428 | 0.332047 |
| Si | Si245 | 0.442550 | 0.963605 | 0.828393 |
| Si | Si246 | 0.943143 | 0.959488 | 0.655708 |

|    |       |          |          |          |
|----|-------|----------|----------|----------|
| Si | Si247 | 0.593469 | 0.461200 | 0.166799 |
| Si | Si248 | 0.946060 | 0.526151 | 0.661050 |
| Si | Si249 | 0.591072 | 0.019452 | 0.165418 |
| Si | Si250 | 0.216175 | 0.059297 | 0.202447 |
| Si | Si251 | 0.317912 | 0.563195 | 0.708485 |
| Si | Si252 | 0.215802 | 0.421882 | 0.209417 |
| Si | Si253 | 0.320000 | 0.925488 | 0.703188 |
| Si | Si254 | 0.815839 | 0.932703 | 0.786740 |
| Si | Si255 | 0.720278 | 0.443937 | 0.298446 |
| Si | Si256 | 0.825433 | 0.551552 | 0.806058 |
| Si | Si257 | 0.716138 | 0.058661 | 0.291213 |
| Si | Si258 | 0.445688 | 0.819796 | 0.183923 |
| Si | Si259 | 0.093724 | 0.322029 | 0.691100 |
| Si | Si260 | 0.444568 | 0.663013 | 0.190877 |
| Si | Si261 | 0.092499 | 0.164804 | 0.689193 |
| Si | Si262 | 0.590711 | 0.161033 | 0.798029 |
| Si | Si263 | 0.954116 | 0.663310 | 0.296529 |
| Si | Si264 | 0.594606 | 0.320249 | 0.802268 |
| Si | Si265 | 0.951400 | 0.821879 | 0.290506 |
| Si | Si266 | 0.339793 | 0.866827 | 0.329497 |
| Si | Si267 | 0.203636 | 0.365614 | 0.836819 |
| Si | Si268 | 0.339190 | 0.621090 | 0.337623 |
| Si | Si269 | 0.201790 | 0.122683 | 0.832803 |
| Si | Si270 | 0.704668 | 0.124869 | 0.650997 |
| Si | Si271 | 0.843491 | 0.620980 | 0.156641 |
| Si | Si272 | 0.708807 | 0.357139 | 0.657036 |
| Si | Si273 | 0.836228 | 0.858575 | 0.152935 |
| Si | Si274 | 0.289938 | 0.822719 | 0.536857 |
| Si | Si275 | 0.250186 | 0.321442 | 0.044350 |
| Si | Si276 | 0.291251 | 0.663380 | 0.545564 |
| Si | Si277 | 0.250083 | 0.161671 | 0.042314 |
| Si | Si278 | 0.747133 | 0.171276 | 0.440395 |
| Si | Si279 | 0.791846 | 0.667331 | 0.951886 |
| Si | Si280 | 0.750207 | 0.326737 | 0.441180 |
| Si | Si281 | 0.789795 | 0.820888 | 0.936628 |
| Si | Si282 | 0.137591 | 0.819770 | 0.535166 |
| Si | Si283 | 0.402410 | 0.318503 | 0.039961 |
| Si | Si284 | 0.138660 | 0.663802 | 0.543137 |
| Si | Si285 | 0.402714 | 0.162873 | 0.035521 |
| Si | Si286 | 0.900942 | 0.167952 | 0.448042 |
| Si | Si287 | 0.637681 | 0.664527 | 0.944818 |
| Si | Si288 | 0.903836 | 0.321567 | 0.452718 |
| Si | Si289 | 0.635878 | 0.819328 | 0.933225 |
| Si | Si290 | 0.095147 | 0.865124 | 0.324832 |

|    |       |          |          |          |
|----|-------|----------|----------|----------|
| Si | Si291 | 0.447782 | 0.363044 | 0.827408 |
| Si | Si292 | 0.098952 | 0.619565 | 0.329011 |
| Si | Si293 | 0.443516 | 0.121916 | 0.819195 |
| Si | Si294 | 0.948258 | 0.115975 | 0.655591 |
| Si | Si295 | 0.589422 | 0.617303 | 0.152303 |
| Si | Si296 | 0.948351 | 0.367153 | 0.664166 |
| Si | Si297 | 0.592305 | 0.860264 | 0.146840 |
| Si | Si298 | 0.217805 | 0.819980 | 0.194703 |
| Si | Si299 | 0.324189 | 0.321347 | 0.700679 |
| Si | Si300 | 0.220084 | 0.668728 | 0.203324 |
| Si | Si301 | 0.320055 | 0.170423 | 0.696700 |
| Si | Si302 | 0.827040 | 0.159250 | 0.791246 |
| Si | Si303 | 0.826569 | 0.312874 | 0.788416 |
| Si | Si304 | 0.712648 | 0.814875 | 0.279907 |
| Zn | Zn305 | 0.687700 | 0.717181 | 0.477022 |

**M-C<sub>6</sub>H<sub>7</sub>Zn-OH<sub>2</sub>-ZnOH<sup>+</sup> (Fig. 9b/M2 in Green)** Total energy = -1945.44714981 eV

data\_

\_audit\_creation\_method 'Materials Studio'

\_cell\_length\_a 20.357621

\_cell\_length\_b 20.050598

\_cell\_length\_c 13.476578

\_cell\_angle\_alpha 90.000000

\_cell\_angle\_beta 90.000000

\_cell\_angle\_gamma 90.000000

\_symmetry\_space\_group\_name\_H-M 'P1'

loop\_

\_atom\_site\_type\_symbol

\_atom\_site\_label

\_atom\_site\_fract\_x

\_atom\_site\_fract\_y

\_atom\_site\_fract\_z

|   |     |          |          |          |
|---|-----|----------|----------|----------|
| H | H1  | 0.773322 | 0.728310 | 0.603661 |
| H | H2  | 0.543664 | 0.808881 | 0.397568 |
| H | H3  | 0.492337 | 0.862992 | 0.541775 |
| H | H4  | 0.492718 | 0.804363 | 0.706706 |
| H | H5  | 0.508924 | 0.682721 | 0.714072 |
| H | H6  | 0.473964 | 0.659076 | 0.518938 |
| H | H7  | 0.546659 | 0.622452 | 0.563671 |
| H | H8  | 0.559265 | 0.687255 | 0.399515 |
| H | H9  | 0.728495 | 0.789310 | 0.627906 |
| C | C10 | 0.536383 | 0.781329 | 0.466159 |
| C | C11 | 0.508653 | 0.811477 | 0.546040 |

|   |     |          |          |          |
|---|-----|----------|----------|----------|
| C | C12 | 0.504279 | 0.776235 | 0.640075 |
| C | C13 | 0.513659 | 0.709513 | 0.644411 |
| C | C14 | 0.523177 | 0.670641 | 0.549652 |
| C | C15 | 0.560395 | 0.711805 | 0.472054 |
| O | O16 | 0.516865 | 0.034681 | 0.217460 |
| O | O17 | 0.019465 | 0.539704 | 0.715389 |
| O | O18 | 0.527395 | 0.436016 | 0.211816 |
| O | O19 | 0.009059 | 0.935122 | 0.705185 |
| O | O20 | 0.513565 | 0.945204 | 0.787624 |
| O | O21 | 0.022659 | 0.455787 | 0.295084 |
| O | O22 | 0.515683 | 0.538824 | 0.791576 |
| O | O23 | 0.017379 | 0.034886 | 0.294293 |
| O | O24 | 0.397655 | 0.060428 | 0.285432 |
| O | O25 | 0.135008 | 0.554508 | 0.796473 |
| O | O26 | 0.408637 | 0.436293 | 0.290773 |
| O | O27 | 0.126848 | 0.939889 | 0.785157 |
| O | O28 | 0.627817 | 0.952548 | 0.702490 |
| O | O29 | 0.907642 | 0.443336 | 0.209522 |
| O | O30 | 0.635378 | 0.536025 | 0.725276 |
| O | O31 | 0.900370 | 0.045654 | 0.215176 |
| O | O32 | 0.439138 | 0.117814 | 0.119179 |
| O | O33 | 0.105446 | 0.623737 | 0.635660 |
| O | O34 | 0.435327 | 0.358659 | 0.136263 |
| O | O35 | 0.105518 | 0.865242 | 0.625532 |
| O | O36 | 0.609926 | 0.863706 | 0.843900 |
| O | O37 | 0.936837 | 0.368797 | 0.365598 |
| O | O38 | 0.603599 | 0.618465 | 0.871939 |
| O | O39 | 0.932490 | 0.119177 | 0.373775 |
| O | O40 | 0.412524 | 0.988305 | 0.122744 |
| O | O41 | 0.125559 | 0.493324 | 0.622495 |
| O | O42 | 0.428281 | 0.489168 | 0.111906 |
| O | O43 | 0.104932 | 0.997021 | 0.609478 |
| O | O44 | 0.615657 | 0.992450 | 0.890241 |
| O | O45 | 0.913543 | 0.498197 | 0.387698 |
| O | O46 | 0.608289 | 0.486939 | 0.904871 |
| O | O47 | 0.913477 | 0.988756 | 0.391991 |
| O | O48 | 0.336838 | 0.040110 | 0.456240 |
| O | O49 | 0.199667 | 0.537997 | 0.962696 |
| O | O50 | 0.343131 | 0.451309 | 0.457600 |
| O | O51 | 0.194569 | 0.950732 | 0.950809 |
| O | O52 | 0.692265 | 0.932999 | 0.537219 |
| O | O53 | 0.840434 | 0.427697 | 0.045317 |
| O | O54 | 0.707534 | 0.535339 | 0.565816 |
| O | O55 | 0.835069 | 0.034852 | 0.045323 |

|   |     |          |          |          |
|---|-----|----------|----------|----------|
| 0 | 056 | 0.335753 | 0.946877 | 0.314595 |
| 0 | 057 | 0.206127 | 0.445590 | 0.819125 |
| 0 | 058 | 0.332996 | 0.542900 | 0.313481 |
| 0 | 059 | 0.205602 | 0.043917 | 0.809215 |
| 0 | 060 | 0.714411 | 0.043322 | 0.644711 |
| 0 | 061 | 0.843823 | 0.546445 | 0.129174 |
| 0 | 062 | 0.721719 | 0.437698 | 0.697800 |
| 0 | 063 | 0.827391 | 0.938071 | 0.179808 |
| 0 | 064 | 0.266370 | 0.056947 | 0.294150 |
| 0 | 065 | 0.265613 | 0.561289 | 0.796589 |
| 0 | 066 | 0.277930 | 0.425160 | 0.291537 |
| 0 | 067 | 0.256700 | 0.925336 | 0.781388 |
| 0 | 068 | 0.756393 | 0.925411 | 0.706099 |
| 0 | 069 | 0.776647 | 0.447789 | 0.212387 |
| 0 | 070 | 0.762711 | 0.559501 | 0.740912 |
| 0 | 071 | 0.770665 | 0.054866 | 0.213239 |
| 0 | 072 | 0.307552 | 0.121380 | 0.603339 |
| 0 | 073 | 0.227092 | 0.617192 | 0.113450 |
| 0 | 074 | 0.320233 | 0.373281 | 0.611533 |
| 0 | 075 | 0.220304 | 0.868594 | 0.099420 |
| 0 | 076 | 0.705972 | 0.876208 | 0.362876 |
| 0 | 077 | 0.813049 | 0.356883 | 0.887291 |
| 0 | 078 | 0.716575 | 0.629349 | 0.431010 |
| 0 | 079 | 0.810101 | 0.117531 | 0.897231 |
| 0 | 080 | 0.216446 | 0.039613 | 0.531548 |
| 0 | 081 | 0.319635 | 0.538981 | 0.035540 |
| 0 | 082 | 0.221463 | 0.436536 | 0.519763 |
| 0 | 083 | 0.316298 | 0.938384 | 0.014347 |
| 0 | 084 | 0.810645 | 0.922731 | 0.460622 |
| 0 | 085 | 0.723815 | 0.440768 | 0.958804 |
| 0 | 086 | 0.824795 | 0.565111 | 0.493748 |
| 0 | 087 | 0.712383 | 0.052900 | 0.987578 |
| 0 | 088 | 0.316564 | 0.991424 | 0.635438 |
| 0 | 089 | 0.221361 | 0.486681 | 0.139333 |
| 0 | 090 | 0.305816 | 0.503503 | 0.629768 |
| 0 | 091 | 0.227352 | 0.998706 | 0.127325 |
| 0 | 092 | 0.724165 | 0.006370 | 0.382199 |
| 0 | 093 | 0.831330 | 0.486772 | 0.870150 |
| 0 | 094 | 0.738295 | 0.503109 | 0.380897 |
| 0 | 095 | 0.793010 | 0.988880 | 0.869861 |
| 0 | 096 | 0.128601 | 0.127268 | 0.599087 |
| 0 | 097 | 0.410657 | 0.620693 | 0.106548 |
| 0 | 098 | 0.130546 | 0.361093 | 0.602057 |
| 0 | 099 | 0.406105 | 0.857651 | 0.092812 |

|   |      |          |          |          |
|---|------|----------|----------|----------|
| 0 | 0100 | 0.911294 | 0.854872 | 0.390767 |
| 0 | 0101 | 0.630495 | 0.355736 | 0.900917 |
| 0 | 0102 | 0.919238 | 0.630758 | 0.398269 |
| 0 | 0103 | 0.619240 | 0.125073 | 0.901984 |
| 0 | 0104 | 0.103776 | 0.059029 | 0.436589 |
| 0 | 0105 | 0.433221 | 0.553843 | 0.941962 |
| 0 | 0106 | 0.099275 | 0.437104 | 0.449980 |
| 0 | 0107 | 0.438657 | 0.938151 | 0.946207 |
| 0 | 0108 | 0.923088 | 0.919112 | 0.558871 |
| 0 | 0109 | 0.618592 | 0.418649 | 0.071926 |
| 0 | 0110 | 0.946829 | 0.558471 | 0.556186 |
| 0 | 0111 | 0.592553 | 0.053586 | 0.061284 |
| 0 | 0112 | 0.140141 | 0.056818 | 0.246661 |
| 0 | 0113 | 0.392329 | 0.555884 | 0.754658 |
| 0 | 0114 | 0.147635 | 0.421152 | 0.268502 |
| 0 | 0115 | 0.386989 | 0.924672 | 0.766720 |
| 0 | 0116 | 0.883210 | 0.951015 | 0.740736 |
| 0 | 0117 | 0.650160 | 0.455395 | 0.256205 |
| 0 | 0118 | 0.892762 | 0.560369 | 0.736166 |
| 0 | 0119 | 0.642436 | 0.055773 | 0.245205 |
| 0 | 0120 | 0.109596 | 0.944768 | 0.338536 |
| 0 | 0121 | 0.430489 | 0.442202 | 0.836185 |
| 0 | 0122 | 0.119051 | 0.541790 | 0.332786 |
| 0 | 0123 | 0.428734 | 0.042878 | 0.827125 |
| 0 | 0124 | 0.945904 | 0.039346 | 0.628881 |
| 0 | 0125 | 0.589905 | 0.539964 | 0.132557 |
| 0 | 0126 | 0.934173 | 0.446448 | 0.657850 |
| 0 | 0127 | 0.605474 | 0.942050 | 0.164730 |
| 0 | 0128 | 0.222543 | 0.130453 | 0.146021 |
| 0 | 0129 | 0.316115 | 0.634207 | 0.651528 |
| 0 | 0130 | 0.224409 | 0.353777 | 0.149294 |
| 0 | 0131 | 0.315814 | 0.858006 | 0.640579 |
| 0 | 0132 | 0.819245 | 0.861073 | 0.845802 |
| 0 | 0133 | 0.727102 | 0.372844 | 0.353928 |
| 0 | 0134 | 0.830222 | 0.619683 | 0.881346 |
| 0 | 0135 | 0.718017 | 0.135115 | 0.348754 |
| 0 | 0136 | 0.517934 | 0.846877 | 0.196126 |
| 0 | 0137 | 0.021719 | 0.354210 | 0.711394 |
| 0 | 0138 | 0.521911 | 0.640102 | 0.209964 |
| 0 | 0139 | 0.018819 | 0.136667 | 0.706930 |
| 0 | 0140 | 0.517617 | 0.135207 | 0.778419 |
| 0 | 0141 | 0.026528 | 0.630240 | 0.285237 |
| 0 | 0142 | 0.521984 | 0.351720 | 0.789530 |
| 0 | 0143 | 0.019737 | 0.856939 | 0.280756 |

|   |      |          |          |          |
|---|------|----------|----------|----------|
| 0 | 0144 | 0.404569 | 0.836142 | 0.287253 |
| 0 | 0145 | 0.137174 | 0.333734 | 0.794257 |
| 0 | 0146 | 0.408883 | 0.650696 | 0.299051 |
| 0 | 0147 | 0.133809 | 0.153742 | 0.792368 |
| 0 | 0148 | 0.636607 | 0.142379 | 0.708129 |
| 0 | 0149 | 0.914418 | 0.646879 | 0.200077 |
| 0 | 0150 | 0.637563 | 0.336172 | 0.705781 |
| 0 | 0151 | 0.905068 | 0.831908 | 0.197327 |
| 0 | 0152 | 0.442472 | 0.740916 | 0.162366 |
| 0 | 0153 | 0.089651 | 0.244635 | 0.665819 |
| 0 | 0154 | 0.591437 | 0.241176 | 0.823538 |
| 0 | 0155 | 0.959737 | 0.742700 | 0.319416 |
| 0 | 0156 | 0.333763 | 0.850529 | 0.448084 |
| 0 | 0157 | 0.206874 | 0.350879 | 0.955863 |
| 0 | 0158 | 0.334802 | 0.633457 | 0.457231 |
| 0 | 0159 | 0.205214 | 0.134886 | 0.952551 |
| 0 | 0160 | 0.703520 | 0.155681 | 0.543604 |
| 0 | 0161 | 0.824551 | 0.668351 | 0.065169 |
| 0 | 0162 | 0.709024 | 0.353089 | 0.545456 |
| 0 | 0163 | 0.831197 | 0.843509 | 0.039443 |
| 0 | 0164 | 0.273868 | 0.835391 | 0.274480 |
| 0 | 0165 | 0.267999 | 0.333228 | 0.784055 |
| 0 | 0166 | 0.279796 | 0.661337 | 0.283156 |
| 0 | 0167 | 0.264647 | 0.159561 | 0.782039 |
| 0 | 0168 | 0.766408 | 0.152471 | 0.716969 |
| 0 | 0169 | 0.789857 | 0.637047 | 0.250407 |
| 0 | 0170 | 0.767120 | 0.315486 | 0.712159 |
| 0 | 0171 | 0.775168 | 0.820682 | 0.214741 |
| 0 | 0172 | 0.298270 | 0.743927 | 0.550325 |
| 0 | 0173 | 0.243837 | 0.242160 | 0.052047 |
| 0 | 0174 | 0.740293 | 0.252774 | 0.423615 |
| 0 | 0175 | 0.795953 | 0.744142 | 0.914031 |
| 0 | 0176 | 0.213205 | 0.842652 | 0.519398 |
| 0 | 0177 | 0.327429 | 0.342446 | 0.027692 |
| 0 | 0178 | 0.214278 | 0.643205 | 0.528798 |
| 0 | 0179 | 0.325809 | 0.139859 | 0.025627 |
| 0 | 0180 | 0.822141 | 0.152240 | 0.465245 |
| 0 | 0181 | 0.714552 | 0.645997 | 0.963956 |
| 0 | 0182 | 0.829067 | 0.344539 | 0.471877 |
| 0 | 0183 | 0.712909 | 0.842113 | 0.960965 |
| 0 | 0184 | 0.132920 | 0.743531 | 0.571976 |
| 0 | 0185 | 0.406194 | 0.240043 | 0.071684 |
| 0 | 0186 | 0.910264 | 0.245825 | 0.417905 |
| 0 | 0187 | 0.630681 | 0.743480 | 0.913994 |



|    |       |          |          |          |
|----|-------|----------|----------|----------|
| O  | O188  | 0.096412 | 0.830863 | 0.434774 |
| O  | O189  | 0.444031 | 0.332197 | 0.942505 |
| O  | O190  | 0.098287 | 0.649730 | 0.443240 |
| O  | O191  | 0.438582 | 0.154943 | 0.930153 |
| O  | O192  | 0.934072 | 0.161708 | 0.562940 |
| O  | O193  | 0.601154 | 0.661163 | 0.059552 |
| O  | O194  | 0.945872 | 0.334124 | 0.555340 |
| O  | O195  | 0.592092 | 0.842519 | 0.035106 |
| O  | O196  | 0.145216 | 0.831823 | 0.251120 |
| O  | O197  | 0.396438 | 0.326970 | 0.757551 |
| O  | O198  | 0.151312 | 0.659906 | 0.262935 |
| O  | O199  | 0.392245 | 0.155977 | 0.744981 |
| O  | O200  | 0.892853 | 0.129780 | 0.746486 |
| O  | O201  | 0.649762 | 0.633447 | 0.239890 |
| O  | O202  | 0.895393 | 0.333531 | 0.737524 |
| O  | O203  | 0.645117 | 0.820570 | 0.211022 |
| O  | O204  | 0.221179 | 0.744251 | 0.158231 |
| O  | O205  | 0.318032 | 0.246330 | 0.657855 |
| O  | O206  | 0.835335 | 0.235297 | 0.827943 |
| O  | O207  | 0.708404 | 0.745121 | 0.340210 |
| O  | O208  | 0.737700 | 0.755522 | 0.578226 |
| Al | Al209 | 0.717271 | 0.660217 | 0.305635 |
| Si | Si210 | 0.441608 | 0.050535 | 0.185773 |
| Si | Si211 | 0.096274 | 0.552734 | 0.691437 |
| Si | Si212 | 0.449757 | 0.430302 | 0.187782 |
| Si | Si213 | 0.087181 | 0.934361 | 0.680953 |
| Si | Si214 | 0.591587 | 0.938726 | 0.807570 |
| Si | Si215 | 0.945384 | 0.441793 | 0.315157 |
| Si | Si216 | 0.591631 | 0.545098 | 0.825032 |
| Si | Si217 | 0.940693 | 0.047320 | 0.319407 |
| Si | Si218 | 0.334183 | 0.026064 | 0.338012 |
| Si | Si219 | 0.201848 | 0.524677 | 0.844474 |
| Si | Si220 | 0.340667 | 0.463829 | 0.338705 |
| Si | Si221 | 0.195955 | 0.964913 | 0.832435 |
| Si | Si222 | 0.697487 | 0.964460 | 0.647851 |
| Si | Si223 | 0.842219 | 0.467041 | 0.150447 |
| Si | Si224 | 0.707099 | 0.516796 | 0.682255 |
| Si | Si225 | 0.833561 | 0.018233 | 0.163310 |
| Si | Si226 | 0.294049 | 0.048183 | 0.556995 |
| Si | Si227 | 0.242355 | 0.545434 | 0.063587 |
| Si | Si228 | 0.297715 | 0.440901 | 0.555325 |
| Si | Si229 | 0.239595 | 0.939070 | 0.048635 |
| Si | Si230 | 0.733803 | 0.934351 | 0.434010 |
| Si | Si231 | 0.801779 | 0.428202 | 0.940430 |

|    |       |          |          |          |
|----|-------|----------|----------|----------|
| Si | Si232 | 0.746884 | 0.558363 | 0.467075 |
| Si | Si233 | 0.788117 | 0.048736 | 0.950178 |
| Si | Si234 | 0.138818 | 0.055717 | 0.544463 |
| Si | Si235 | 0.397878 | 0.550770 | 0.049615 |
| Si | Si236 | 0.144290 | 0.432294 | 0.548955 |
| Si | Si237 | 0.393155 | 0.930595 | 0.044229 |
| Si | Si238 | 0.889848 | 0.921903 | 0.449469 |
| Si | Si239 | 0.645573 | 0.425265 | 0.959104 |
| Si | Si240 | 0.900966 | 0.563004 | 0.457600 |
| Si | Si241 | 0.634916 | 0.055901 | 0.959510 |
| Si | Si242 | 0.092549 | 0.023785 | 0.329301 |
| Si | Si243 | 0.442780 | 0.522199 | 0.832051 |
| Si | Si244 | 0.096955 | 0.463820 | 0.336050 |
| Si | Si245 | 0.441783 | 0.963162 | 0.831698 |
| Si | Si246 | 0.940218 | 0.961080 | 0.658700 |
| Si | Si247 | 0.596836 | 0.462995 | 0.168104 |
| Si | Si248 | 0.948090 | 0.525959 | 0.666839 |
| Si | Si249 | 0.589483 | 0.021302 | 0.172130 |
| Si | Si250 | 0.214150 | 0.059999 | 0.203206 |
| Si | Si251 | 0.319757 | 0.563005 | 0.708184 |
| Si | Si252 | 0.217966 | 0.422407 | 0.212055 |
| Si | Si253 | 0.318683 | 0.925664 | 0.705558 |
| Si | Si254 | 0.813558 | 0.932392 | 0.790326 |
| Si | Si255 | 0.723029 | 0.445191 | 0.300617 |
| Si | Si256 | 0.829279 | 0.555833 | 0.808033 |
| Si | Si257 | 0.713764 | 0.062369 | 0.296743 |
| Si | Si258 | 0.443078 | 0.820046 | 0.184381 |
| Si | Si259 | 0.094455 | 0.323049 | 0.693557 |
| Si | Si260 | 0.446724 | 0.663071 | 0.193980 |
| Si | Si261 | 0.092462 | 0.165743 | 0.690669 |
| Si | Si262 | 0.591248 | 0.161670 | 0.802905 |
| Si | Si263 | 0.954419 | 0.663034 | 0.300711 |
| Si | Si264 | 0.595053 | 0.320932 | 0.805567 |
| Si | Si265 | 0.948966 | 0.821003 | 0.296825 |
| Si | Si266 | 0.336858 | 0.867026 | 0.330913 |
| Si | Si267 | 0.204451 | 0.365866 | 0.838023 |
| Si | Si268 | 0.339070 | 0.621952 | 0.338398 |
| Si | Si269 | 0.202266 | 0.123064 | 0.833899 |
| Si | Si270 | 0.705036 | 0.123587 | 0.653778 |
| Si | Si271 | 0.841426 | 0.624426 | 0.163533 |
| Si | Si272 | 0.708609 | 0.360579 | 0.665029 |
| Si | Si273 | 0.834498 | 0.858580 | 0.157514 |
| Si | Si274 | 0.289982 | 0.823373 | 0.539683 |
| Si | Si275 | 0.250816 | 0.322050 | 0.046478 |

|    |       |          |          |          |
|----|-------|----------|----------|----------|
| Si | Si276 | 0.290808 | 0.664131 | 0.546750 |
| Si | Si277 | 0.249627 | 0.162351 | 0.043799 |
| Si | Si278 | 0.746076 | 0.173879 | 0.445307 |
| Si | Si279 | 0.791304 | 0.668610 | 0.956741 |
| Si | Si280 | 0.751533 | 0.330678 | 0.448905 |
| Si | Si281 | 0.789752 | 0.822404 | 0.941696 |
| Si | Si282 | 0.136968 | 0.820766 | 0.537581 |
| Si | Si283 | 0.403318 | 0.318597 | 0.044180 |
| Si | Si284 | 0.137853 | 0.665022 | 0.544954 |
| Si | Si285 | 0.402364 | 0.162979 | 0.036660 |
| Si | Si286 | 0.900026 | 0.169305 | 0.454367 |
| Si | Si287 | 0.637441 | 0.666993 | 0.953273 |
| Si | Si288 | 0.905441 | 0.323369 | 0.452630 |
| Si | Si289 | 0.636328 | 0.822320 | 0.939442 |
| Si | Si290 | 0.093078 | 0.865971 | 0.325982 |
| Si | Si291 | 0.448092 | 0.363374 | 0.831316 |
| Si | Si292 | 0.099106 | 0.620244 | 0.331067 |
| Si | Si293 | 0.444088 | 0.122109 | 0.820342 |
| Si | Si294 | 0.947603 | 0.117264 | 0.661582 |
| Si | Si295 | 0.592736 | 0.618940 | 0.162754 |
| Si | Si296 | 0.949177 | 0.367171 | 0.665365 |
| Si | Si297 | 0.590172 | 0.863054 | 0.151841 |
| Si | Si298 | 0.215189 | 0.820803 | 0.195973 |
| Si | Si299 | 0.325630 | 0.321080 | 0.702668 |
| Si | Si300 | 0.219996 | 0.669483 | 0.204116 |
| Si | Si301 | 0.320575 | 0.169922 | 0.697109 |
| Si | Si302 | 0.826084 | 0.158251 | 0.796374 |
| Si | Si303 | 0.827763 | 0.311473 | 0.790933 |
| Si | Si304 | 0.709184 | 0.815640 | 0.282919 |
| Zn | Zn305 | 0.658845 | 0.712196 | 0.491768 |

**TS-C<sub>6</sub>H<sub>7</sub>ZnOH<sub>2</sub>-HTransfer-Concerted-ZnOH<sup>+</sup> (Fig. 9b/TS2 in Green)**

Total energy = -1944.14522895 eV

data\_

\_audit\_creation\_method 'Materials Studio'

\_cell\_length\_a 20.357621

\_cell\_length\_b 20.050598

\_cell\_length\_c 13.476578

\_cell\_angle\_alpha 90.000000

\_cell\_angle\_beta 90.000000

\_cell\_angle\_gamma 90.000000

\_symmetry\_space\_group\_name\_H-M 'P1'

loop\_

| <u>_atom_site_type_symbol</u> |     |          |          |          |
|-------------------------------|-----|----------|----------|----------|
| <u>_atom_site_label</u>       |     |          |          |          |
| <u>_atom_site_fract_x</u>     |     |          |          |          |
| <u>_atom_site_fract_y</u>     |     |          |          |          |
| <u>_atom_site_fract_z</u>     |     |          |          |          |
| H                             | H1  | 0.740531 | 0.751636 | 0.615148 |
| H                             | H2  | 0.656008 | 0.753747 | 0.657599 |
| H                             | H3  | 0.524416 | 0.657647 | 0.428492 |
| H                             | H4  | 0.559813 | 0.777884 | 0.443523 |
| H                             | H5  | 0.563949 | 0.835511 | 0.600548 |
| H                             | H6  | 0.613151 | 0.772910 | 0.666323 |
| H                             | H7  | 0.489401 | 0.794085 | 0.733152 |
| H                             | H8  | 0.431741 | 0.687992 | 0.709535 |
| H                             | H9  | 0.455704 | 0.614429 | 0.565091 |
| C                             | C10 | 0.521514 | 0.684497 | 0.498523 |
| C                             | C11 | 0.559290 | 0.745692 | 0.509261 |
| C                             | C12 | 0.553750 | 0.782344 | 0.604447 |
| C                             | C13 | 0.501790 | 0.762098 | 0.670886 |
| C                             | C14 | 0.469725 | 0.702725 | 0.657314 |
| C                             | C15 | 0.481908 | 0.661216 | 0.573056 |
| O                             | O16 | 0.488126 | 0.030978 | 0.211787 |
| O                             | O17 | 0.994003 | 0.533087 | 0.707269 |
| O                             | O18 | 0.498642 | 0.443614 | 0.206185 |
| O                             | O19 | 0.987478 | 0.943971 | 0.707423 |
| O                             | O20 | 0.494499 | 0.959190 | 0.790917 |
| O                             | O21 | 0.990802 | 0.460386 | 0.290967 |
| O                             | O22 | 0.486862 | 0.545394 | 0.791915 |
| O                             | O23 | 0.996958 | 0.043744 | 0.292742 |
| O                             | O24 | 0.371144 | 0.060206 | 0.283434 |
| O                             | O25 | 0.109969 | 0.557968 | 0.785896 |
| O                             | O26 | 0.376487 | 0.453416 | 0.267745 |
| O                             | O27 | 0.109639 | 0.956948 | 0.766140 |
| O                             | O28 | 0.611747 | 0.934122 | 0.718363 |
| O                             | O29 | 0.876271 | 0.430328 | 0.210930 |
| O                             | O30 | 0.607367 | 0.534173 | 0.725763 |
| O                             | O31 | 0.873060 | 0.034844 | 0.239713 |
| O                             | O32 | 0.411859 | 0.116575 | 0.116351 |
| O                             | O33 | 0.074620 | 0.618142 | 0.619214 |
| O                             | O34 | 0.409055 | 0.366073 | 0.127263 |
| O                             | O35 | 0.078374 | 0.867358 | 0.628183 |
| O                             | O36 | 0.571914 | 0.873410 | 0.882785 |
| O                             | O37 | 0.914052 | 0.369633 | 0.375364 |
| O                             | O38 | 0.578684 | 0.625759 | 0.860627 |
| O                             | O39 | 0.910061 | 0.121102 | 0.379808 |

|   |     |          |          |          |
|---|-----|----------|----------|----------|
| 0 | 040 | 0.379072 | 0.987746 | 0.121670 |
| 0 | 041 | 0.104170 | 0.488629 | 0.620594 |
| 0 | 042 | 0.409331 | 0.496142 | 0.087072 |
| 0 | 043 | 0.074319 | 0.997010 | 0.585105 |
| 0 | 044 | 0.602890 | 0.002635 | 0.883760 |
| 0 | 045 | 0.878709 | 0.497335 | 0.379260 |
| 0 | 046 | 0.578505 | 0.496576 | 0.910171 |
| 0 | 047 | 0.911869 | 0.990618 | 0.416763 |
| 0 | 048 | 0.306500 | 0.063671 | 0.451118 |
| 0 | 049 | 0.176514 | 0.564544 | 0.952284 |
| 0 | 050 | 0.309297 | 0.448861 | 0.433087 |
| 0 | 051 | 0.176224 | 0.946386 | 0.931516 |
| 0 | 052 | 0.678731 | 0.926537 | 0.553600 |
| 0 | 053 | 0.811109 | 0.424524 | 0.042952 |
| 0 | 054 | 0.676903 | 0.534426 | 0.564520 |
| 0 | 055 | 0.808281 | 0.044634 | 0.072449 |
| 0 | 056 | 0.320354 | 0.948102 | 0.356831 |
| 0 | 057 | 0.165848 | 0.448465 | 0.859085 |
| 0 | 058 | 0.295300 | 0.552768 | 0.313798 |
| 0 | 059 | 0.194358 | 0.052023 | 0.816499 |
| 0 | 060 | 0.666036 | 0.044092 | 0.641812 |
| 0 | 061 | 0.826973 | 0.541203 | 0.132008 |
| 0 | 062 | 0.691672 | 0.435547 | 0.692546 |
| 0 | 063 | 0.790061 | 0.938423 | 0.186716 |
| 0 | 064 | 0.241197 | 0.041302 | 0.285313 |
| 0 | 065 | 0.240572 | 0.544722 | 0.784863 |
| 0 | 066 | 0.247137 | 0.436010 | 0.261186 |
| 0 | 067 | 0.238205 | 0.934379 | 0.759323 |
| 0 | 068 | 0.742176 | 0.950457 | 0.719798 |
| 0 | 069 | 0.746423 | 0.449558 | 0.207809 |
| 0 | 070 | 0.736609 | 0.554733 | 0.737304 |
| 0 | 071 | 0.744238 | 0.055501 | 0.242516 |
| 0 | 072 | 0.276543 | 0.131726 | 0.612234 |
| 0 | 073 | 0.211545 | 0.631309 | 0.112618 |
| 0 | 074 | 0.303326 | 0.376107 | 0.591578 |
| 0 | 075 | 0.180857 | 0.875175 | 0.092042 |
| 0 | 076 | 0.706524 | 0.864614 | 0.388675 |
| 0 | 077 | 0.776654 | 0.360637 | 0.880613 |
| 0 | 078 | 0.681658 | 0.621197 | 0.421592 |
| 0 | 079 | 0.799045 | 0.117541 | 0.913341 |
| 0 | 080 | 0.193882 | 0.039558 | 0.544376 |
| 0 | 081 | 0.290162 | 0.537269 | 0.040696 |
| 0 | 082 | 0.192113 | 0.424406 | 0.510529 |
| 0 | 083 | 0.292638 | 0.922289 | 0.011235 |

|   |      |          |          |          |
|---|------|----------|----------|----------|
| 0 | 084  | 0.791042 | 0.952985 | 0.458741 |
| 0 | 085  | 0.696125 | 0.451150 | 0.957616 |
| 0 | 086  | 0.793563 | 0.564992 | 0.490148 |
| 0 | 087  | 0.690537 | 0.065344 | 0.994926 |
| 0 | 088  | 0.306513 | 0.003168 | 0.625203 |
| 0 | 089  | 0.178230 | 0.503288 | 0.125890 |
| 0 | 090  | 0.273433 | 0.504771 | 0.603394 |
| 0 | 091  | 0.210744 | 0.003814 | 0.101480 |
| 0 | 092  | 0.677153 | 0.993709 | 0.384990 |
| 0 | 093  | 0.807113 | 0.489418 | 0.872416 |
| 0 | 094  | 0.709997 | 0.494510 | 0.384239 |
| 0 | 095  | 0.775258 | 0.987773 | 0.902035 |
| 0 | 096  | 0.102216 | 0.127151 | 0.595273 |
| 0 | 097  | 0.378901 | 0.625740 | 0.099049 |
| 0 | 098  | 0.090674 | 0.359109 | 0.585755 |
| 0 | 099  | 0.397232 | 0.859359 | 0.081515 |
| 0 | 0100 | 0.879759 | 0.861751 | 0.405598 |
| 0 | 0101 | 0.605647 | 0.366556 | 0.893337 |
| 0 | 0102 | 0.893588 | 0.627733 | 0.405139 |
| 0 | 0103 | 0.590262 | 0.132127 | 0.916740 |
| 0 | 0104 | 0.094385 | 0.066445 | 0.421395 |
| 0 | 0105 | 0.391704 | 0.566968 | 0.924067 |
| 0 | 0106 | 0.071328 | 0.444559 | 0.441562 |
| 0 | 0107 | 0.412566 | 0.948141 | 0.941128 |
| 0 | 0108 | 0.889308 | 0.921449 | 0.580400 |
| 0 | 0109 | 0.591729 | 0.421663 | 0.069838 |
| 0 | 0110 | 0.914996 | 0.545905 | 0.554264 |
| 0 | 0111 | 0.569064 | 0.047699 | 0.061823 |
| 0 | 0112 | 0.117432 | 0.038540 | 0.230065 |
| 0 | 0113 | 0.365671 | 0.536264 | 0.734671 |
| 0 | 0114 | 0.116022 | 0.429776 | 0.257428 |
| 0 | 0115 | 0.369455 | 0.930102 | 0.756997 |
| 0 | 0116 | 0.866940 | 0.953063 | 0.770589 |
| 0 | 0117 | 0.621035 | 0.449932 | 0.258279 |
| 0 | 0118 | 0.867841 | 0.561628 | 0.737377 |
| 0 | 0119 | 0.613142 | 0.060149 | 0.246655 |
| 0 | 0120 | 0.075767 | 0.944993 | 0.353402 |
| 0 | 0121 | 0.411755 | 0.445171 | 0.857798 |
| 0 | 0122 | 0.085255 | 0.549615 | 0.325043 |
| 0 | 0123 | 0.401557 | 0.050793 | 0.819211 |
| 0 | 0124 | 0.910934 | 0.043587 | 0.643964 |
| 0 | 0125 | 0.573047 | 0.542851 | 0.137545 |
| 0 | 0126 | 0.901827 | 0.441664 | 0.673935 |
| 0 | 0127 | 0.581500 | 0.941190 | 0.175791 |

|   |      |          |          |          |
|---|------|----------|----------|----------|
| 0 | 0128 | 0.196487 | 0.128616 | 0.152749 |
| 0 | 0129 | 0.292528 | 0.629243 | 0.654282 |
| 0 | 0130 | 0.186297 | 0.370316 | 0.119633 |
| 0 | 0131 | 0.301706 | 0.870198 | 0.618202 |
| 0 | 0132 | 0.788843 | 0.862832 | 0.849512 |
| 0 | 0133 | 0.701756 | 0.366112 | 0.345079 |
| 0 | 0134 | 0.798279 | 0.622403 | 0.875309 |
| 0 | 0135 | 0.682401 | 0.126143 | 0.378451 |
| 0 | 0136 | 0.492506 | 0.847042 | 0.216304 |
| 0 | 0137 | 0.992129 | 0.349180 | 0.716016 |
| 0 | 0138 | 0.489524 | 0.633699 | 0.204486 |
| 0 | 0139 | 0.995523 | 0.134711 | 0.708863 |
| 0 | 0140 | 0.492700 | 0.143196 | 0.784662 |
| 0 | 0141 | 0.997118 | 0.644600 | 0.286567 |
| 0 | 0142 | 0.495080 | 0.354516 | 0.788460 |
| 0 | 0143 | 0.988710 | 0.854375 | 0.295206 |
| 0 | 0144 | 0.369721 | 0.839212 | 0.272095 |
| 0 | 0145 | 0.113158 | 0.339710 | 0.778089 |
| 0 | 0146 | 0.376944 | 0.654870 | 0.292769 |
| 0 | 0147 | 0.111778 | 0.152792 | 0.789399 |
| 0 | 0148 | 0.614501 | 0.151942 | 0.724941 |
| 0 | 0149 | 0.881307 | 0.650125 | 0.209120 |
| 0 | 0150 | 0.609421 | 0.333104 | 0.702017 |
| 0 | 0151 | 0.873658 | 0.838274 | 0.210839 |
| 0 | 0152 | 0.420179 | 0.742607 | 0.160478 |
| 0 | 0153 | 0.064158 | 0.243343 | 0.664676 |
| 0 | 0154 | 0.565144 | 0.248118 | 0.837939 |
| 0 | 0155 | 0.918284 | 0.745849 | 0.335323 |
| 0 | 0156 | 0.299457 | 0.828138 | 0.431805 |
| 0 | 0157 | 0.187535 | 0.328391 | 0.933200 |
| 0 | 0158 | 0.309917 | 0.643169 | 0.459655 |
| 0 | 0159 | 0.176888 | 0.144604 | 0.958465 |
| 0 | 0160 | 0.686899 | 0.164284 | 0.566995 |
| 0 | 0161 | 0.798315 | 0.660983 | 0.063403 |
| 0 | 0162 | 0.679025 | 0.351630 | 0.538280 |
| 0 | 0163 | 0.806234 | 0.846143 | 0.043939 |
| 0 | 0164 | 0.241374 | 0.864456 | 0.263583 |
| 0 | 0165 | 0.241059 | 0.364046 | 0.761153 |
| 0 | 0166 | 0.246851 | 0.672932 | 0.294557 |
| 0 | 0167 | 0.242043 | 0.172178 | 0.794520 |
| 0 | 0168 | 0.742940 | 0.128159 | 0.737437 |
| 0 | 0169 | 0.756023 | 0.623940 | 0.242729 |
| 0 | 0170 | 0.739905 | 0.314895 | 0.702168 |
| 0 | 0171 | 0.743699 | 0.817507 | 0.210332 |

|    |       |          |          |          |
|----|-------|----------|----------|----------|
| O  | O172  | 0.273205 | 0.745399 | 0.576575 |
| O  | O173  | 0.214998 | 0.245373 | 0.077063 |
| O  | O174  | 0.715519 | 0.248799 | 0.424139 |
| O  | O175  | 0.768932 | 0.745937 | 0.923126 |
| O  | O176  | 0.187957 | 0.841602 | 0.530193 |
| O  | O177  | 0.299663 | 0.341295 | 0.029400 |
| O  | O178  | 0.189922 | 0.646155 | 0.535003 |
| O  | O179  | 0.297535 | 0.146145 | 0.030285 |
| O  | O180  | 0.797379 | 0.148931 | 0.466893 |
| O  | O181  | 0.684913 | 0.649251 | 0.968422 |
| O  | O182  | 0.800815 | 0.345306 | 0.469697 |
| O  | O183  | 0.686403 | 0.845267 | 0.969193 |
| O  | O184  | 0.105676 | 0.743176 | 0.581219 |
| O  | O185  | 0.381865 | 0.242153 | 0.079347 |
| O  | O186  | 0.882317 | 0.246297 | 0.421443 |
| O  | O187  | 0.602999 | 0.748496 | 0.918242 |
| O  | O188  | 0.073044 | 0.827468 | 0.439330 |
| O  | O189  | 0.414317 | 0.326211 | 0.937710 |
| O  | O190  | 0.080193 | 0.660134 | 0.433492 |
| O  | O191  | 0.408802 | 0.159546 | 0.931277 |
| O  | O192  | 0.908712 | 0.163880 | 0.567811 |
| O  | O193  | 0.565885 | 0.659384 | 0.050521 |
| O  | O194  | 0.913864 | 0.332481 | 0.563307 |
| O  | O195  | 0.575618 | 0.830138 | 0.068317 |
| O  | O196  | 0.113840 | 0.837872 | 0.252325 |
| O  | O197  | 0.369100 | 0.340749 | 0.753769 |
| O  | O198  | 0.121034 | 0.664497 | 0.246089 |
| O  | O199  | 0.368188 | 0.167107 | 0.743763 |
| O  | O200  | 0.871205 | 0.145619 | 0.755101 |
| O  | O201  | 0.616344 | 0.650600 | 0.232953 |
| O  | O202  | 0.866763 | 0.324903 | 0.747161 |
| O  | O203  | 0.617065 | 0.827369 | 0.256292 |
| O  | O204  | 0.197957 | 0.756302 | 0.165349 |
| O  | O205  | 0.288338 | 0.256874 | 0.664758 |
| O  | O206  | 0.791044 | 0.234973 | 0.833806 |
| O  | O207  | 0.693061 | 0.739118 | 0.348074 |
| O  | O208  | 0.703540 | 0.721215 | 0.615544 |
| Al | Al209 | 0.687860 | 0.656323 | 0.299406 |
| Si | Si210 | 0.412968 | 0.049022 | 0.182321 |
| Si | Si211 | 0.070172 | 0.549419 | 0.682275 |
| Si | Si212 | 0.422678 | 0.439894 | 0.171889 |
| Si | Si213 | 0.063285 | 0.941218 | 0.671385 |
| Si | Si214 | 0.569907 | 0.942434 | 0.820371 |
| Si | Si215 | 0.915423 | 0.439569 | 0.314764 |



|    |       |          |          |          |
|----|-------|----------|----------|----------|
| Si | Si216 | 0.563516 | 0.550574 | 0.822926 |
| Si | Si217 | 0.922056 | 0.047860 | 0.332332 |
| Si | Si218 | 0.309703 | 0.027975 | 0.343389 |
| Si | Si219 | 0.173222 | 0.528605 | 0.844658 |
| Si | Si220 | 0.307058 | 0.472670 | 0.318654 |
| Si | Si221 | 0.179600 | 0.972376 | 0.818196 |
| Si | Si222 | 0.674693 | 0.964564 | 0.659852 |
| Si | Si223 | 0.815109 | 0.462137 | 0.149486 |
| Si | Si224 | 0.678509 | 0.515125 | 0.680461 |
| Si | Si225 | 0.804054 | 0.018298 | 0.185631 |
| Si | Si226 | 0.270772 | 0.059835 | 0.558405 |
| Si | Si227 | 0.214057 | 0.559412 | 0.058171 |
| Si | Si228 | 0.269148 | 0.438396 | 0.535232 |
| Si | Si229 | 0.215438 | 0.936819 | 0.034764 |
| Si | Si230 | 0.713613 | 0.934875 | 0.445858 |
| Si | Si231 | 0.772654 | 0.431338 | 0.938105 |
| Si | Si232 | 0.716140 | 0.553727 | 0.464609 |
| Si | Si233 | 0.767993 | 0.053941 | 0.970044 |
| Si | Si234 | 0.116266 | 0.057869 | 0.536615 |
| Si | Si235 | 0.367661 | 0.556874 | 0.038188 |
| Si | Si236 | 0.114860 | 0.429567 | 0.539459 |
| Si | Si237 | 0.369930 | 0.929648 | 0.038667 |
| Si | Si238 | 0.868016 | 0.931286 | 0.465021 |
| Si | Si239 | 0.618157 | 0.433832 | 0.957596 |
| Si | Si240 | 0.869958 | 0.558888 | 0.456746 |
| Si | Si241 | 0.613508 | 0.061863 | 0.964582 |
| Si | Si242 | 0.070972 | 0.023510 | 0.324832 |
| Si | Si243 | 0.414253 | 0.523482 | 0.827733 |
| Si | Si244 | 0.065794 | 0.471046 | 0.327975 |
| Si | Si245 | 0.419450 | 0.972104 | 0.826621 |
| Si | Si246 | 0.913872 | 0.965441 | 0.675426 |
| Si | Si247 | 0.571145 | 0.464885 | 0.167751 |
| Si | Si248 | 0.919478 | 0.520730 | 0.668776 |
| Si | Si249 | 0.563083 | 0.020019 | 0.174724 |
| Si | Si250 | 0.191657 | 0.052573 | 0.192846 |
| Si | Si251 | 0.292621 | 0.553089 | 0.695102 |
| Si | Si252 | 0.182271 | 0.435142 | 0.190916 |
| Si | Si253 | 0.303441 | 0.934845 | 0.689787 |
| Si | Si254 | 0.793291 | 0.939090 | 0.810337 |
| Si | Si255 | 0.695141 | 0.440406 | 0.298293 |
| Si | Si256 | 0.802266 | 0.556805 | 0.805822 |
| Si | Si257 | 0.679595 | 0.058674 | 0.312829 |
| Si | Si258 | 0.419877 | 0.821680 | 0.182796 |
| Si | Si259 | 0.064929 | 0.322650 | 0.686189 |

|    |       |          |          |          |
|----|-------|----------|----------|----------|
| Si | Si260 | 0.416864 | 0.664225 | 0.188869 |
| Si | Si261 | 0.068452 | 0.164689 | 0.689574 |
| Si | Si262 | 0.565514 | 0.168979 | 0.815945 |
| Si | Si263 | 0.922081 | 0.667037 | 0.308695 |
| Si | Si264 | 0.568715 | 0.325683 | 0.805520 |
| Si | Si265 | 0.915363 | 0.824695 | 0.311820 |
| Si | Si266 | 0.307569 | 0.870233 | 0.330332 |
| Si | Si267 | 0.177031 | 0.370473 | 0.832310 |
| Si | Si268 | 0.307830 | 0.630741 | 0.340667 |
| Si | Si269 | 0.180603 | 0.130293 | 0.840026 |
| Si | Si270 | 0.677886 | 0.122226 | 0.668352 |
| Si | Si271 | 0.814056 | 0.618701 | 0.163375 |
| Si | Si272 | 0.679370 | 0.358898 | 0.658208 |
| Si | Si273 | 0.804014 | 0.860198 | 0.162413 |
| Si | Si274 | 0.265349 | 0.821670 | 0.539816 |
| Si | Si275 | 0.222279 | 0.321871 | 0.040729 |
| Si | Si276 | 0.266377 | 0.666393 | 0.555026 |
| Si | Si277 | 0.221418 | 0.166572 | 0.053592 |
| Si | Si278 | 0.720711 | 0.171885 | 0.458692 |
| Si | Si279 | 0.762449 | 0.668739 | 0.957436 |
| Si | Si280 | 0.724207 | 0.327793 | 0.444927 |
| Si | Si281 | 0.762661 | 0.824365 | 0.947760 |
| Si | Si282 | 0.111281 | 0.820114 | 0.544565 |
| Si | Si283 | 0.376249 | 0.319277 | 0.043319 |
| Si | Si284 | 0.112667 | 0.666711 | 0.542506 |
| Si | Si285 | 0.374890 | 0.166038 | 0.039542 |
| Si | Si286 | 0.874641 | 0.169816 | 0.459075 |
| Si | Si287 | 0.608389 | 0.670387 | 0.950256 |
| Si | Si288 | 0.877594 | 0.323583 | 0.457167 |
| Si | Si289 | 0.609370 | 0.824096 | 0.959691 |
| Si | Si290 | 0.063023 | 0.866235 | 0.334622 |
| Si | Si291 | 0.422336 | 0.366688 | 0.834012 |
| Si | Si292 | 0.070948 | 0.629292 | 0.323215 |
| Si | Si293 | 0.417710 | 0.130092 | 0.820090 |
| Si | Si294 | 0.921444 | 0.121995 | 0.669128 |
| Si | Si295 | 0.562808 | 0.622159 | 0.158256 |
| Si | Si296 | 0.918408 | 0.362463 | 0.674915 |
| Si | Si297 | 0.566749 | 0.861574 | 0.178417 |
| Si | Si298 | 0.183478 | 0.833167 | 0.194561 |
| Si | Si299 | 0.300488 | 0.334182 | 0.694062 |
| Si | Si300 | 0.193978 | 0.680099 | 0.204513 |
| Si | Si301 | 0.294212 | 0.180826 | 0.703764 |
| Si | Si302 | 0.800958 | 0.156903 | 0.808627 |
| Si | Si303 | 0.794070 | 0.310247 | 0.791009 |

|    |       |          |          |          |
|----|-------|----------|----------|----------|
| Si | Si304 | 0.690060 | 0.812978 | 0.299712 |
| Zn | Zn305 | 0.654435 | 0.709666 | 0.491959 |

**C<sub>6</sub>H<sub>6</sub>-Phys.Ads-H<sub>2</sub>-Phys.Ads-ZnOH<sup>+</sup> (Fig. 9b/M3 in Green)**

Total energy = -1946.05876143 eV

data\_

\_audit\_creation\_method 'Materials Studio'

\_cell\_length\_a 20.357621

\_cell\_length\_b 20.050598

\_cell\_length\_c 13.476578

\_cell\_angle\_alpha 90.000000

\_cell\_angle\_beta 90.000000

\_cell\_angle\_gamma 90.000000

\_symmetry\_space\_group\_name\_H-M 'P1'

loop\_

\_atom\_site\_type\_symbol

\_atom\_site\_label

\_atom\_site\_fract\_x

\_atom\_site\_fract\_y

\_atom\_site\_fract\_z

|   |     |          |          |          |
|---|-----|----------|----------|----------|
| H | H1  | 0.747768 | 0.750053 | 0.656064 |
| H | H2  | 0.546330 | 0.797679 | 0.705311 |
| H | H3  | 0.564081 | 0.848287 | 0.539054 |
| H | H4  | 0.565191 | 0.775885 | 0.389072 |
| H | H5  | 0.552104 | 0.653328 | 0.406274 |
| H | H6  | 0.536050 | 0.602996 | 0.573433 |
| H | H7  | 0.531931 | 0.675871 | 0.722168 |
| H | H8  | 0.491305 | 0.530723 | 0.438444 |
| H | H9  | 0.508269 | 0.502083 | 0.415406 |
| C | C10 | 0.547544 | 0.766434 | 0.639771 |
| C | C11 | 0.557410 | 0.794768 | 0.546272 |
| C | C12 | 0.559081 | 0.753896 | 0.462117 |
| C | C13 | 0.551378 | 0.684742 | 0.471751 |
| C | C14 | 0.541892 | 0.656554 | 0.565590 |
| C | C15 | 0.539677 | 0.697514 | 0.649393 |
| O | O16 | 0.521668 | 0.033058 | 0.216114 |
| O | O17 | 0.021441 | 0.539860 | 0.716827 |
| O | O18 | 0.525933 | 0.437874 | 0.216139 |
| O | O19 | 0.014233 | 0.932332 | 0.707626 |
| O | O20 | 0.516222 | 0.945515 | 0.789681 |
| O | O21 | 0.019622 | 0.456410 | 0.293856 |
| O | O22 | 0.517108 | 0.536499 | 0.794375 |
| O | O23 | 0.022535 | 0.035307 | 0.294845 |

|   |     |          |          |          |
|---|-----|----------|----------|----------|
| 0 | 024 | 0.404832 | 0.055906 | 0.293489 |
| 0 | 025 | 0.140061 | 0.556517 | 0.787205 |
| 0 | 026 | 0.403080 | 0.429850 | 0.278235 |
| 0 | 027 | 0.130287 | 0.938701 | 0.791520 |
| 0 | 028 | 0.630211 | 0.946119 | 0.703270 |
| 0 | 029 | 0.901943 | 0.434587 | 0.220130 |
| 0 | 030 | 0.637011 | 0.527696 | 0.732876 |
| 0 | 031 | 0.905893 | 0.042475 | 0.214483 |
| 0 | 032 | 0.440587 | 0.119750 | 0.130010 |
| 0 | 033 | 0.103944 | 0.620299 | 0.624052 |
| 0 | 034 | 0.443266 | 0.361797 | 0.119410 |
| 0 | 035 | 0.112725 | 0.862099 | 0.633487 |
| 0 | 036 | 0.608876 | 0.861936 | 0.850929 |
| 0 | 037 | 0.940983 | 0.369918 | 0.381216 |
| 0 | 038 | 0.605842 | 0.615441 | 0.873154 |
| 0 | 039 | 0.935066 | 0.118537 | 0.371082 |
| 0 | 040 | 0.414380 | 0.990723 | 0.123850 |
| 0 | 041 | 0.123805 | 0.489438 | 0.619459 |
| 0 | 042 | 0.432339 | 0.493453 | 0.109420 |
| 0 | 043 | 0.111591 | 0.993298 | 0.613366 |
| 0 | 044 | 0.620911 | 0.991111 | 0.888218 |
| 0 | 045 | 0.912685 | 0.499633 | 0.389684 |
| 0 | 046 | 0.605877 | 0.485052 | 0.914759 |
| 0 | 047 | 0.919525 | 0.987943 | 0.393165 |
| 0 | 048 | 0.341174 | 0.037140 | 0.460933 |
| 0 | 049 | 0.200277 | 0.538708 | 0.956840 |
| 0 | 050 | 0.341924 | 0.448595 | 0.450181 |
| 0 | 051 | 0.198038 | 0.949575 | 0.956392 |
| 0 | 052 | 0.694945 | 0.938103 | 0.537135 |
| 0 | 053 | 0.838502 | 0.423072 | 0.051404 |
| 0 | 054 | 0.705901 | 0.538468 | 0.570925 |
| 0 | 055 | 0.840795 | 0.035823 | 0.044525 |
| 0 | 056 | 0.337881 | 0.944439 | 0.317666 |
| 0 | 057 | 0.205404 | 0.444511 | 0.815972 |
| 0 | 058 | 0.336495 | 0.541278 | 0.307632 |
| 0 | 059 | 0.209935 | 0.042135 | 0.813630 |
| 0 | 060 | 0.711795 | 0.043910 | 0.653842 |
| 0 | 061 | 0.851002 | 0.542367 | 0.131736 |
| 0 | 062 | 0.726316 | 0.435254 | 0.692069 |
| 0 | 063 | 0.830410 | 0.937261 | 0.176230 |
| 0 | 064 | 0.273402 | 0.057403 | 0.296517 |
| 0 | 065 | 0.270665 | 0.557067 | 0.794028 |
| 0 | 066 | 0.272674 | 0.427615 | 0.287971 |
| 0 | 067 | 0.259962 | 0.922682 | 0.786987 |

|   |      |          |          |          |
|---|------|----------|----------|----------|
| 0 | 068  | 0.760390 | 0.928253 | 0.707154 |
| 0 | 069  | 0.772365 | 0.452353 | 0.213920 |
| 0 | 070  | 0.763916 | 0.555756 | 0.745162 |
| 0 | 071  | 0.776349 | 0.055420 | 0.211617 |
| 0 | 072  | 0.314825 | 0.117679 | 0.610474 |
| 0 | 073  | 0.230972 | 0.617606 | 0.106704 |
| 0 | 074  | 0.317025 | 0.369066 | 0.601402 |
| 0 | 075  | 0.222213 | 0.868715 | 0.107280 |
| 0 | 076  | 0.715278 | 0.871215 | 0.372343 |
| 0 | 077  | 0.808956 | 0.353043 | 0.892635 |
| 0 | 078  | 0.719527 | 0.629289 | 0.431265 |
| 0 | 079  | 0.812790 | 0.117788 | 0.896775 |
| 0 | 080  | 0.220768 | 0.040756 | 0.533601 |
| 0 | 081  | 0.318906 | 0.532252 | 0.035632 |
| 0 | 082  | 0.219548 | 0.435009 | 0.513244 |
| 0 | 083  | 0.319338 | 0.935697 | 0.019364 |
| 0 | 084  | 0.816127 | 0.926711 | 0.468379 |
| 0 | 085  | 0.722832 | 0.440195 | 0.963659 |
| 0 | 086  | 0.824420 | 0.563116 | 0.499222 |
| 0 | 087  | 0.717361 | 0.050356 | 0.986804 |
| 0 | 088  | 0.317719 | 0.987198 | 0.638175 |
| 0 | 089  | 0.215313 | 0.487598 | 0.134911 |
| 0 | 090  | 0.304976 | 0.499788 | 0.623559 |
| 0 | 091  | 0.231833 | 0.998917 | 0.131487 |
| 0 | 092  | 0.729228 | 0.001977 | 0.375456 |
| 0 | 093  | 0.831475 | 0.482971 | 0.876144 |
| 0 | 094  | 0.735664 | 0.502197 | 0.387097 |
| 0 | 095  | 0.801200 | 0.988019 | 0.870584 |
| 0 | 096  | 0.130650 | 0.124248 | 0.603362 |
| 0 | 097  | 0.404654 | 0.623050 | 0.099619 |
| 0 | 098  | 0.130375 | 0.357698 | 0.598344 |
| 0 | 099  | 0.413020 | 0.859705 | 0.096455 |
| 0 | 0100 | 0.911141 | 0.854853 | 0.388640 |
| 0 | 0101 | 0.630142 | 0.354381 | 0.907287 |
| 0 | 0102 | 0.916040 | 0.632332 | 0.403327 |
| 0 | 0103 | 0.624675 | 0.123440 | 0.900777 |
| 0 | 0104 | 0.106504 | 0.055770 | 0.441275 |
| 0 | 0105 | 0.428956 | 0.555676 | 0.936367 |
| 0 | 0106 | 0.096986 | 0.433399 | 0.446750 |
| 0 | 0107 | 0.441081 | 0.939791 | 0.948065 |
| 0 | 0108 | 0.931400 | 0.916254 | 0.557838 |
| 0 | 0109 | 0.619421 | 0.415497 | 0.080039 |
| 0 | 0110 | 0.947192 | 0.559443 | 0.559093 |
| 0 | 0111 | 0.596869 | 0.050781 | 0.059179 |

|   |      |          |          |          |
|---|------|----------|----------|----------|
| 0 | 0112 | 0.146257 | 0.057478 | 0.253163 |
| 0 | 0113 | 0.395729 | 0.547125 | 0.745226 |
| 0 | 0114 | 0.143264 | 0.420268 | 0.263221 |
| 0 | 0115 | 0.389926 | 0.921754 | 0.768988 |
| 0 | 0116 | 0.888171 | 0.945799 | 0.739854 |
| 0 | 0117 | 0.647652 | 0.451211 | 0.266336 |
| 0 | 0118 | 0.894045 | 0.552713 | 0.739682 |
| 0 | 0119 | 0.647591 | 0.054106 | 0.241655 |
| 0 | 0120 | 0.113830 | 0.943763 | 0.337504 |
| 0 | 0121 | 0.433492 | 0.439482 | 0.844365 |
| 0 | 0122 | 0.117451 | 0.540304 | 0.334839 |
| 0 | 0123 | 0.428992 | 0.041895 | 0.824253 |
| 0 | 0124 | 0.950489 | 0.035943 | 0.630425 |
| 0 | 0125 | 0.595422 | 0.537967 | 0.137796 |
| 0 | 0126 | 0.941689 | 0.444247 | 0.650819 |
| 0 | 0127 | 0.609443 | 0.939610 | 0.165109 |
| 0 | 0128 | 0.226763 | 0.130658 | 0.149673 |
| 0 | 0129 | 0.320249 | 0.630033 | 0.648519 |
| 0 | 0130 | 0.222701 | 0.354329 | 0.145539 |
| 0 | 0131 | 0.317245 | 0.854140 | 0.644837 |
| 0 | 0132 | 0.821017 | 0.859244 | 0.845679 |
| 0 | 0133 | 0.731554 | 0.371729 | 0.356668 |
| 0 | 0134 | 0.832599 | 0.616297 | 0.882329 |
| 0 | 0135 | 0.721482 | 0.131848 | 0.349518 |
| 0 | 0136 | 0.523167 | 0.843643 | 0.203020 |
| 0 | 0137 | 0.025179 | 0.351176 | 0.715883 |
| 0 | 0138 | 0.516584 | 0.633664 | 0.202199 |
| 0 | 0139 | 0.020187 | 0.134600 | 0.710302 |
| 0 | 0140 | 0.519913 | 0.133464 | 0.782731 |
| 0 | 0141 | 0.023088 | 0.626939 | 0.289880 |
| 0 | 0142 | 0.525135 | 0.351645 | 0.788744 |
| 0 | 0143 | 0.022881 | 0.855867 | 0.284730 |
| 0 | 0144 | 0.408474 | 0.834203 | 0.289836 |
| 0 | 0145 | 0.143271 | 0.329755 | 0.789967 |
| 0 | 0146 | 0.403835 | 0.653652 | 0.291673 |
| 0 | 0147 | 0.135095 | 0.150557 | 0.796402 |
| 0 | 0148 | 0.637211 | 0.147170 | 0.706979 |
| 0 | 0149 | 0.910439 | 0.648391 | 0.206707 |
| 0 | 0150 | 0.642722 | 0.333793 | 0.712842 |
| 0 | 0151 | 0.909816 | 0.831876 | 0.195668 |
| 0 | 0152 | 0.445478 | 0.741146 | 0.158748 |
| 0 | 0153 | 0.091631 | 0.241331 | 0.666982 |
| 0 | 0154 | 0.591466 | 0.240453 | 0.829739 |
| 0 | 0155 | 0.961228 | 0.742471 | 0.321862 |

|   |      |          |          |          |
|---|------|----------|----------|----------|
| 0 | 0156 | 0.338477 | 0.848480 | 0.451884 |
| 0 | 0157 | 0.210562 | 0.349579 | 0.952418 |
| 0 | 0158 | 0.336165 | 0.630510 | 0.454111 |
| 0 | 0159 | 0.208125 | 0.133536 | 0.955814 |
| 0 | 0160 | 0.706395 | 0.153355 | 0.543675 |
| 0 | 0161 | 0.826391 | 0.664152 | 0.065063 |
| 0 | 0162 | 0.709211 | 0.346809 | 0.546677 |
| 0 | 0163 | 0.834001 | 0.840681 | 0.038830 |
| 0 | 0164 | 0.278040 | 0.831390 | 0.278607 |
| 0 | 0165 | 0.274510 | 0.335782 | 0.782817 |
| 0 | 0166 | 0.272863 | 0.655267 | 0.286654 |
| 0 | 0167 | 0.265354 | 0.159251 | 0.783531 |
| 0 | 0168 | 0.767090 | 0.154085 | 0.718523 |
| 0 | 0169 | 0.783840 | 0.627992 | 0.243676 |
| 0 | 0170 | 0.772830 | 0.314254 | 0.711141 |
| 0 | 0171 | 0.780399 | 0.819693 | 0.215947 |
| 0 | 0172 | 0.301741 | 0.740970 | 0.550405 |
| 0 | 0173 | 0.246251 | 0.241645 | 0.052712 |
| 0 | 0174 | 0.743529 | 0.249846 | 0.421556 |
| 0 | 0175 | 0.798829 | 0.741406 | 0.914416 |
| 0 | 0176 | 0.216994 | 0.840061 | 0.519010 |
| 0 | 0177 | 0.329275 | 0.342307 | 0.031014 |
| 0 | 0178 | 0.216929 | 0.640678 | 0.529679 |
| 0 | 0179 | 0.329014 | 0.139388 | 0.027977 |
| 0 | 0180 | 0.825373 | 0.149896 | 0.466505 |
| 0 | 0181 | 0.716563 | 0.643788 | 0.964597 |
| 0 | 0182 | 0.830632 | 0.341510 | 0.477251 |
| 0 | 0183 | 0.715379 | 0.838994 | 0.961246 |
| 0 | 0184 | 0.136330 | 0.741652 | 0.572361 |
| 0 | 0185 | 0.408724 | 0.239745 | 0.073622 |
| 0 | 0186 | 0.912729 | 0.244248 | 0.419823 |
| 0 | 0187 | 0.632237 | 0.740725 | 0.914748 |
| 0 | 0188 | 0.097819 | 0.833136 | 0.441566 |
| 0 | 0189 | 0.439769 | 0.322048 | 0.930023 |
| 0 | 0190 | 0.104833 | 0.654327 | 0.433894 |
| 0 | 0191 | 0.444007 | 0.149044 | 0.938623 |
| 0 | 0192 | 0.938468 | 0.157602 | 0.561495 |
| 0 | 0193 | 0.602750 | 0.658346 | 0.060298 |
| 0 | 0194 | 0.944512 | 0.325252 | 0.567287 |
| 0 | 0195 | 0.596938 | 0.836492 | 0.042154 |
| 0 | 0196 | 0.148753 | 0.828039 | 0.259428 |
| 0 | 0197 | 0.401326 | 0.331710 | 0.741191 |
| 0 | 0198 | 0.145981 | 0.654370 | 0.246392 |
| 0 | 0199 | 0.394089 | 0.159440 | 0.756226 |

|    |       |          |          |          |
|----|-------|----------|----------|----------|
| O  | O200  | 0.893140 | 0.126466 | 0.742791 |
| O  | O201  | 0.642049 | 0.637987 | 0.246887 |
| O  | O202  | 0.898520 | 0.341126 | 0.751547 |
| O  | O203  | 0.650290 | 0.819783 | 0.219683 |
| O  | O204  | 0.222874 | 0.742945 | 0.160095 |
| O  | O205  | 0.320051 | 0.244409 | 0.658633 |
| O  | O206  | 0.841750 | 0.234479 | 0.825716 |
| O  | O207  | 0.717587 | 0.742198 | 0.342193 |
| O  | O208  | 0.739408 | 0.774421 | 0.595377 |
| Al | Al209 | 0.714960 | 0.656389 | 0.302914 |
| Si | Si210 | 0.445724 | 0.050047 | 0.190379 |
| Si | Si211 | 0.097494 | 0.551424 | 0.685957 |
| Si | Si212 | 0.450200 | 0.430921 | 0.180912 |
| Si | Si213 | 0.092498 | 0.931694 | 0.686020 |
| Si | Si214 | 0.594081 | 0.936445 | 0.809194 |
| Si | Si215 | 0.943888 | 0.440239 | 0.321906 |
| Si | Si216 | 0.592537 | 0.541202 | 0.830397 |
| Si | Si217 | 0.945479 | 0.046150 | 0.319137 |
| Si | Si218 | 0.339202 | 0.023597 | 0.342604 |
| Si | Si219 | 0.204237 | 0.523938 | 0.839141 |
| Si | Si220 | 0.338749 | 0.461801 | 0.331437 |
| Si | Si221 | 0.199742 | 0.963241 | 0.837910 |
| Si | Si222 | 0.699553 | 0.963892 | 0.650671 |
| Si | Si223 | 0.841192 | 0.463757 | 0.155421 |
| Si | Si224 | 0.708447 | 0.514042 | 0.685339 |
| Si | Si225 | 0.838563 | 0.017550 | 0.161771 |
| Si | Si226 | 0.298257 | 0.045906 | 0.561397 |
| Si | Si227 | 0.241556 | 0.544277 | 0.059224 |
| Si | Si228 | 0.296094 | 0.438019 | 0.547571 |
| Si | Si229 | 0.242863 | 0.938140 | 0.054439 |
| Si | Si230 | 0.739532 | 0.934149 | 0.438031 |
| Si | Si231 | 0.800427 | 0.424920 | 0.945870 |
| Si | Si232 | 0.746881 | 0.557285 | 0.472242 |
| Si | Si233 | 0.793348 | 0.048044 | 0.949427 |
| Si | Si234 | 0.142705 | 0.053351 | 0.548217 |
| Si | Si235 | 0.396055 | 0.551144 | 0.045704 |
| Si | Si236 | 0.142862 | 0.429115 | 0.544906 |
| Si | Si237 | 0.396725 | 0.931487 | 0.047048 |
| Si | Si238 | 0.894653 | 0.921739 | 0.451396 |
| Si | Si239 | 0.644861 | 0.423432 | 0.966474 |
| Si | Si240 | 0.900486 | 0.563399 | 0.461718 |
| Si | Si241 | 0.640031 | 0.054064 | 0.958094 |
| Si | Si242 | 0.097031 | 0.022952 | 0.332004 |
| Si | Si243 | 0.443544 | 0.519324 | 0.831039 |



|    |       |          |          |          |
|----|-------|----------|----------|----------|
| Si | Si244 | 0.094317 | 0.462542 | 0.334155 |
| Si | Si245 | 0.443938 | 0.962507 | 0.832465 |
| Si | Si246 | 0.945630 | 0.957424 | 0.659474 |
| Si | Si247 | 0.597213 | 0.461041 | 0.174741 |
| Si | Si248 | 0.950655 | 0.523876 | 0.667671 |
| Si | Si249 | 0.594009 | 0.019180 | 0.170393 |
| Si | Si250 | 0.219635 | 0.060276 | 0.207576 |
| Si | Si251 | 0.322582 | 0.557942 | 0.702624 |
| Si | Si252 | 0.213713 | 0.422999 | 0.207370 |
| Si | Si253 | 0.320983 | 0.922112 | 0.709309 |
| Si | Si254 | 0.817883 | 0.930669 | 0.789972 |
| Si | Si255 | 0.722146 | 0.444201 | 0.305810 |
| Si | Si256 | 0.830653 | 0.551223 | 0.811567 |
| Si | Si257 | 0.718626 | 0.060240 | 0.294232 |
| Si | Si258 | 0.447681 | 0.819424 | 0.187064 |
| Si | Si259 | 0.097276 | 0.319887 | 0.692720 |
| Si | Si260 | 0.443329 | 0.662801 | 0.187541 |
| Si | Si261 | 0.094150 | 0.162835 | 0.694236 |
| Si | Si262 | 0.593324 | 0.161459 | 0.805114 |
| Si | Si263 | 0.952590 | 0.662965 | 0.305501 |
| Si | Si264 | 0.597228 | 0.319794 | 0.809854 |
| Si | Si265 | 0.951457 | 0.820767 | 0.297556 |
| Si | Si266 | 0.340637 | 0.864550 | 0.334350 |
| Si | Si267 | 0.208529 | 0.364899 | 0.834831 |
| Si | Si268 | 0.337277 | 0.620125 | 0.334993 |
| Si | Si269 | 0.204471 | 0.121359 | 0.837221 |
| Si | Si270 | 0.705678 | 0.124327 | 0.655872 |
| Si | Si271 | 0.841285 | 0.620260 | 0.163761 |
| Si | Si272 | 0.712242 | 0.357328 | 0.665831 |
| Si | Si273 | 0.838855 | 0.857709 | 0.155945 |
| Si | Si274 | 0.293434 | 0.820613 | 0.541869 |
| Si | Si275 | 0.252424 | 0.321547 | 0.045617 |
| Si | Si276 | 0.293713 | 0.661229 | 0.545296 |
| Si | Si277 | 0.252777 | 0.161768 | 0.046296 |
| Si | Si278 | 0.749270 | 0.171092 | 0.445629 |
| Si | Si279 | 0.793505 | 0.665862 | 0.956452 |
| Si | Si280 | 0.753765 | 0.327239 | 0.450761 |
| Si | Si281 | 0.792304 | 0.819896 | 0.940884 |
| Si | Si282 | 0.140811 | 0.819439 | 0.541158 |
| Si | Si283 | 0.405189 | 0.316848 | 0.038306 |
| Si | Si284 | 0.140636 | 0.664066 | 0.540060 |
| Si | Si285 | 0.405545 | 0.161851 | 0.042300 |
| Si | Si286 | 0.903203 | 0.167067 | 0.454244 |
| Si | Si287 | 0.639417 | 0.664368 | 0.954131 |

|    |       |          |          |          |
|----|-------|----------|----------|----------|
| Si | Si288 | 0.907276 | 0.320324 | 0.460942 |
| Si | Si289 | 0.638585 | 0.819232 | 0.942543 |
| Si | Si290 | 0.096071 | 0.865019 | 0.330531 |
| Si | Si291 | 0.449839 | 0.361291 | 0.825698 |
| Si | Si292 | 0.098231 | 0.618811 | 0.326314 |
| Si | Si293 | 0.446532 | 0.120849 | 0.825669 |
| Si | Si294 | 0.950224 | 0.114027 | 0.661501 |
| Si | Si295 | 0.590576 | 0.617338 | 0.163436 |
| Si | Si296 | 0.952407 | 0.365367 | 0.671421 |
| Si | Si297 | 0.594937 | 0.860180 | 0.157235 |
| Si | Si298 | 0.218027 | 0.818752 | 0.201466 |
| Si | Si299 | 0.328107 | 0.320883 | 0.696108 |
| Si | Si300 | 0.218358 | 0.666769 | 0.199898 |
| Si | Si301 | 0.323549 | 0.169046 | 0.702086 |
| Si | Si302 | 0.828491 | 0.157716 | 0.795113 |
| Si | Si303 | 0.830547 | 0.311456 | 0.794970 |
| Si | Si304 | 0.716201 | 0.814831 | 0.286905 |
| Zn | Zn305 | 0.719548 | 0.720475 | 0.492399 |
